# Supplementary material for: PDZD7-MYO7A complex identified in enriched stereocilia membranes
Source: eLife. 2016 Aug 15;5:e18312. doi: 10.7554/eLife.18312 (PMC5005036; doi:10.7554/eLife.18312)
Supplement: Figure 2—source data 2. — DOI: http://dx.doi.org/10.7554/eLife.18312.008 [file elife-18312-fig2-data2.xls]

## Sheet: Read me
File:	Figure 2—Source data 2 (mclust clustering data)
In support of:	Morgan et al. "PDZD7-MYO7A Complex Identified in Enriched Stereocilia Membranes"
General comments:	Output from the clustering program mclust, with each protein assigned to one cluster.
Tabs:	Label	Description
	Read me	Read me
	Summary	Number of proteins per cluster; heat map showing clustering
	Data	All data
	Sorted	Sorted by cluster and averaged. Mean ± SD (standard deviation) is also calculated for each cluster, as is the slope.
Column Headers:	#	Header	Description	Hidden?
	1	Protein	Protein symbol (all caps, non-italicized gene name in almost all cases)	No
	2	S1	Normalized signal (signal for each protein minus the mean for the protein divided by the standard deviation)	No
	3	S2	" "	Yes
	4	P2	" "	Yes
	5	S3	" "	Yes
	6	M3	" "	Yes
	7	S6	" "	No
	8	P6	" "	No
	9	P7	" "	No
	10	S7	" "	No
	11	cluster	Cluster # (arbitrary designation)	No

## Sheet: Summary
Cluster #	# Proteins
1	81
2	139
3	100
4	94
5	106
6	44
7	52
8	109
9	67
10	113
11	87
12	47
13	116
14	79
15	103
16	52
17	65
18	69
19	94
20	66
21	88
22	112
23	41
24	30
25	88

## Sheet: Data
Protein	S1	S2	P2	S3	M3	S6	P6	P7	S7	cluster
H2A-VII	-0.448593	-2.51615	0.373118	0.345691	0.501679	0.100302	0.652362	0.61847	0.373118	3
H4-I	-0.300308	-2.44497	0.447445	0.491015	0.679731	-0.228557	0.71023	0.685778	-0.0403612	3
H2B-I	-0.532849	-2.46175	0.325723	0.373989	0.552336	-0.0723501	0.571975	0.622583	0.620344	3
ACTB	1.00891	1.58702	-0.997503	-1.07308	-0.580905	1.21973	-0.254826	-0.372857	-0.536485	11
H3-IX	-0.736179	-2.28086	0.225542	-0.0261812	0.160082	1.13492	0.262786	0.512103	0.74779	3
GAPDH	1.46829	1.77711	-0.23062	-0.23941	-0.288848	0.178653	-0.950193	-0.649268	-1.06571	13
ATP5B	0.216032	-1.12167	0.858937	0.916815	0.37017	1.45774	-1.09996	-1.228	-0.370055	5
HIST1H1B	-0.760173	-2.07186	0.38321	0.246632	0.349395	-0.619573	0.931876	1.19509	0.345401	3
ATP5A1	-0.152192	-1.97437	0.907304	0.991616	0.528424	0.954277	-0.495985	-0.903103	0.144023	6
CKB	1.29429	1.5569	0.316497	0.364957	-0.893412	0.252451	-1.06139	-0.869998	-0.960288	4
TUBB4B	0.817249	0.953761	-0.508553	-0.713192	-0.77187	-1.36575	0.392831	1.67599	-0.480474	19
ATP1A1	0.0346309	-1.19642	0.877196	1.02427	0.0809134	0.862703	-0.363905	-1.88345	0.564063	5
SCCPDH	-0.11898	-1.12353	0.679855	0.709214	0.629789	-0.354211	0.234861	-1.90414	1.24714	9
SLC25A6	-0.0478949	-1.89528	0.87309	0.863246	0.403064	0.903757	0.0537388	-1.36759	0.213863	6
VDAC2	-0.192148	-1.59759	0.377671	0.391324	0.404223	1.40972	0.0830578	-1.57248	0.696218	10
SERPINH1	0.379593	0.573514	0.438222	0.381282	1.57732	0.00409592	-1.02454	-0.479646	-1.84984	2
TUBA4A	0.983291	1.40229	-0.755313	-0.882596	-1.10363	0.578655	0.143654	0.835811	-1.20216	11
MT-CO2	-0.0184162	-1.99417	0.929446	0.728568	0.421577	-0.212683	0.160165	-1.09801	1.08352	9
ENO1	1.41341	1.6231	-0.0616879	-0.0895186	-0.790153	0.573518	-0.98825	-0.756046	-0.924378	4
COCH	-0.80701	-1.12941	-0.189019	-0.626572	-0.196708	0.145839	1.48909	1.77593	-0.462136	1
EEF1A1	1.06398	1.57539	-0.587672	-0.60486	-0.814724	0.99407	-0.325973	0.0818161	-1.38202	11
ATP5I	0.0544877	-1.76678	0.718973	0.684197	0.583887	-0.674705	0.336747	-1.18884	1.25203	9
HSPA5	0.157158	-0.40103	0.406154	0.355902	-0.231184	1.51669	-1.51744	-1.33171	1.04546	2
ANXA5	-0.808537	-1.49032	-0.0439539	-0.0103071	0.441411	1.29775	0.296345	-1.08737	1.40498	10
PPIA	1.60593	1.75793	-0.440955	-0.469792	-0.864167	-0.0793697	-0.997221	-0.120619	-0.391732	13
RPS27A	-0.700097	-1.88072	0.0352052	0.187241	-0.252362	0.357566	1.15276	-0.401281	1.50168	10
HSP90B1	0.766281	0.890482	0.0270237	0.138579	0.268583	1.40942	-1.19268	-1.6314	-0.676288	2
PDIA3	0.884279	0.967844	0.387936	0.612219	-1.32794	1.20043	-1.01471	-1.02791	-0.682141	14
HSPA8	1.39796	1.86497	-0.295484	-0.268272	-0.795581	0.268256	-0.795581	-0.439729	-0.936536	13
COX4I1	0.145899	-1.88966	0.819314	0.725146	0.495478	-0.0867087	0.267927	-1.41599	0.938594	9
INA	-0.666336	-1.41631	-0.374139	-0.733237	0.497436	-0.423325	0.931441	1.86433	0.320141	1
NDUFA4	0.152996	-1.52306	0.978669	0.876493	0.589245	-1.05617	0.246995	-1.22162	0.956448	9
PRDX1	1.54057	1.78969	-0.428162	-0.557984	-0.982216	-0.36935	-0.729518	0.229728	-0.492766	13
MPZ	0.32071	-0.718432	0.709225	0.811766	0.35911	-0.481327	0.0112331	-2.14106	1.12877	9
MDH2	1.11864	1.00143	0.850924	1.05765	-1.04769	-0.29844	-1.3114	-0.853854	-0.51726	14
COX6A1	-0.0230185	-1.85621	0.735308	0.860163	0.4271	-0.56232	0.248274	-1.07623	1.24694	9
UQCR10	-0.00529826	-1.64883	0.805245	0.718143	0.625676	-1.26735	0.272022	-0.729689	1.23008	9
CKAP4	-0.7514	-1.95313	0.379563	0.38564	0.461172	-0.354743	0.195897	-0.0790298	1.71603	3
KRT78	-0.81609	-1.34379	-0.381119	-0.595569	0.852853	1.79217	0.141163	0.885028	-0.534643	16
CYB5A	-0.345584	-1.92013	-0.0107833	0.041256	0.457785	0.99593	0.171812	-0.873064	1.48278	10
PDIA6	1.09237	1.16929	0.0809244	0.0176105	-0.249974	0.566907	-0.473714	-0.0069759	-2.19643	2
ATP1B4	0.427493	-0.764309	1.17626	1.24143	0.045499	-0.0504277	-0.310989	-2.03345	0.268491	5
AGR3	0.789269	0.487026	0.731945	0.818346	-0.60498	0.482365	-1.90163	-1.23714	0.434797	14
CD9	0.468946	0.0930765	0.775025	0.865851	0.256452	-1.00021	0.220605	-2.23548	0.555734	5
UQCRC2	0.0100312	-1.98984	0.741421	0.831928	0.568359	-0.234262	0.20025	-1.15308	1.02519	9
MT-CO1	-0.0394247	-1.76901	0.858755	0.694272	0.125278	0.233087	0.101754	-1.43432	1.22961	6
ANXA2	-1.23464	-2.03054	0.620699	0.485502	0.226679	-0.137924	0.607435	0.397995	1.0648	3
ATP5C1	-0.271347	-2.32105	0.667258	0.828781	0.576703	0.949631	-0.095877	-0.398977	0.0648817	6
PGAM1	1.56036	1.76731	-0.0188553	-0.0885623	-0.865207	-0.18938	-0.708193	-0.52189	-0.935587	13
YWHAQ	1.57296	1.8025	-0.136488	-0.151839	-0.726215	-0.652675	-0.869918	-0.124585	-0.713746	13
MT-ATP8	0.471086	-0.780177	0.856882	0.779645	0.6355	-1.96469	0.26017	-0.984297	0.725883	9
HSP90AA1	1.56235	1.88788	-0.332919	-0.436853	-0.605059	-0.214494	-0.519381	-0.434565	-0.906963	13
GOT2	0.981855	0.994077	0.874748	1.01855	-1.12391	0.201459	-0.929188	-0.862734	-1.15485	14
ATP5F1	0.117939	-1.97482	0.972923	1.01526	0.637696	-0.630466	0.425333	-0.976494	0.412633	9
ATP1B1	-0.214142	-1.83601	0.896416	0.946716	0.409743	-0.154447	-0.0358342	-1.16602	1.15358	9
NEFM	-0.670268	-1.34026	-0.455056	-0.617672	0.128086	-0.217858	0.753662	2.10615	0.313223	1
ATP5O	0.0742916	-2.04831	0.89571	0.991125	0.561925	-0.0524129	0.28832	-1.17999	0.469338	6
PKM	1.47864	1.73904	0.0677138	-0.0471985	-0.971213	0.0712533	-0.74623	-0.724861	-0.867144	13
OCM	1.59024	1.65121	-0.473095	-0.657053	-0.742513	-0.0959343	-1.18077	-0.301118	0.209028	4
RPL22	0.795795	1.6714	0.357388	0.221754	-0.657875	-1.51293	-0.257755	0.532898	-1.15068	18
ANXA6	-0.60339	-1.71309	0.603841	0.650893	0.428786	0.136028	0.118136	-1.15687	1.53567	15
HNRNPH3	-0.494037	-1.36699	-0.400849	-0.57067	0.822268	1.72018	0.177196	0.985966	-0.873061	16
P4HB	0.65153	0.805379	0.228141	0.312612	-0.463623	1.70809	-1.23291	-1.23485	-0.774374	2
SRSF3	-0.420458	-1.58563	0.119986	-0.0170594	0.30611	-1.16818	1.1099	1.61317	0.0421645	1
EPYC	0.524081	0.311741	-0.789447	-1.00776	-0.779679	0.908011	-0.219927	1.93259	-0.879607	19
ACO2	1.02081	0.958711	0.952471	1.05539	-0.622572	-0.142373	-1.33221	-1.10107	-0.789158	14
RPL12	1.20279	1.61959	-0.550851	-0.000153997	-1.25601	0.846558	-0.928609	-0.598445	-0.334867	4
TMED4	-0.585827	-1.36202	0.417933	0.263147	0.622748	-0.945448	0.525112	-0.778157	1.84251	15
VDAC1	0.0522763	-1.73557	0.569863	0.60566	0.606536	0.588837	-0.000748422	-1.63629	0.949437	6
RPSA	0.712015	0.984055	-0.116881	0.193188	-0.420828	1.7513	-1.14957	-0.962674	-0.990606	2
LDHB	1.29605	1.55779	-0.000323868	0.0855639	-0.562867	0.663407	-0.95358	-0.894366	-1.19168	4
RPS8	0.844804	0.927818	0.276397	0.428735	-0.88425	-1.95859	0.0766966	1.01016	-0.721773	20
COX6C	0.250276	-1.14194	0.687545	0.939011	0.600093	-1.72144	0.284644	-0.915833	1.01765	9
MDH1	1.40603	1.6369	0.165012	0.0706874	-0.691141	0.278446	-0.897221	-0.902934	-1.06578	4
RPLP1	0.607373	-1.32554	1.16791	0.000661844	0.866023	0.493317	-1.78827	0.388344	-0.409818	2
TPI1	1.54423	1.65808	0.0577889	-0.0832226	-0.874844	0.139402	-1.05031	-0.683236	-0.707885	4
PPIB	1.04567	1.29851	0.408601	0.755353	-1.05588	0.400358	-1.43985	-0.967784	-0.444975	14
RAB1A	0.139451	-0.147571	0.0824998	0.0647496	0.581298	1.11433	-0.244953	-2.38304	0.793237	17
RPS14	0.53602	1.1611	0.280243	0.938024	-1.60169	-0.548	0.35226	0.38744	-1.5054	18
UQCRC1	-0.0369583	-1.96688	0.591703	0.662964	0.461638	0.631718	-0.20555	-1.22612	1.08748	6
RPL14	0.553617	0.594222	0.381357	0.153109	-0.393993	-2.34899	0.381357	1.08879	-0.409462	20
CYB5B	-0.461527	-1.67084	0.456428	0.429895	0.532615	-1.1338	0.468475	-0.275761	1.65452	15
ATP5L	0.0697255	-1.58466	0.851517	0.840641	0.714024	-1.4408	0.500651	-0.754861	0.803762	9
RPS13	0.0855829	0.428982	0.4886	0.462419	0.316212	-2.64554	0.294007	0.350062	0.21967	20
VAMP3	-0.0440444	-0.892331	0.527708	0.275796	0.727322	-0.548086	0.1689	-1.83479	1.61953	15
RPL27	0.18637	0.698355	0.314824	0.531849	0.236872	-2.61525	0.0451169	0.209362	0.392505	20
PGK1	1.47789	1.80081	0.0550533	0.020972	-0.802798	-0.326537	-0.667447	-0.496784	-1.06116	13
SLC25A3	-0.109911	-1.9593	0.822751	0.972012	0.714702	0.58067	0.246609	-1.27221	0.00467612	6
HSPD1	0.0903102	-0.266709	0.448508	0.488946	1.03309	1.56268	-1.36223	-1.24867	-0.745927	2
RPN2	-0.577291	-1.99244	0.431119	0.671612	1.05671	-0.505855	0.623079	-0.646033	0.939094	15
ALDH2	1.03805	0.949807	1.06879	1.10265	-0.530771	-0.650178	-1.01105	-0.969887	-0.997406	14
MBP	0.522953	0.506358	0.125079	-0.121728	-0.608922	-1.74681	0.704279	1.59976	-0.980964	19
RPL36	0.330279	0.467571	0.30602	0.451629	-0.0921267	-2.58349	0.223022	0.794714	0.102376	20
ATP5H	0.195409	-1.60125	0.659261	0.6864	0.708404	-0.790838	0.0140525	-1.23116	1.35972	9
RPS15A	0.242157	0.929826	-0.0864529	0.0994627	-0.354443	-2.14284	0.835793	1.11288	-0.636388	20
RPL35	0.0767296	0.602152	0.543741	0.632155	-0.234122	-2.406	-0.497383	0.535286	0.747443	20
UQCRQ	-0.0324234	-2.31215	0.659033	0.591762	0.437711	0.834985	0.254432	-0.857371	0.424021	6
PHB	-0.182917	-2.11684	0.592437	0.576462	0.351534	1.1615	-0.12918	-0.926778	0.673777	6
COX7A2	0.0221223	-1.49939	0.798906	0.809373	0.888907	-1.49939	0.256865	-0.703834	0.926446	9
RPLP2	0.645098	0.454951	0.589857	0.397789	0.285906	-2.34589	-0.853835	0.0848286	0.741298	20
RPL10A	0.763597	0.960922	0.355294	0.552645	0.0224211	-2.4577	-0.011514	-0.136197	-0.0494718	20
CISD1	-0.139715	-1.77393	1.01867	0.924361	0.564387	-0.706787	0.196587	-1.06192	0.978343	9
GNB1	-0.476387	-1.03262	0.272298	0.127097	0.103639	1.54015	-0.458674	-1.45557	1.38006	10
RPL7A	0.75807	1.29486	0.429843	0.783818	-0.888234	-2.01145	-0.273207	0.0865493	-0.180251	18
HNRNPA3	0.574561	0.419278	-0.433618	-0.370153	-1.10623	0.436428	0.274202	1.78481	-1.57927	19
RPL7	0.308404	0.701956	0.713344	0.560662	-0.485713	-2.23328	-0.304289	1.07653	-0.337619	20
HADHA	-0.662466	-2.26622	0.416419	0.430242	0.675228	1.15099	0.164802	-0.311478	0.402478	3
RPS3	1.3243	1.62462	0.273456	0.281135	-1.12522	-1.08954	-0.0643275	-0.261435	-0.962991	18
HADHB	-0.733441	-2.1273	0.312559	0.319867	0.775288	1.32635	0.0966628	-0.413126	0.443135	3
ANXA8	-0.422597	-1.43837	0.409792	0.391839	0.310373	1.14129	0.114564	-1.64818	1.14129	10
IDH2	1.05021	1.01207	0.846166	0.942614	0.0338558	-1.44068	-0.70313	-0.569366	-1.17174	14
RPL4	0.474929	0.754618	0.481702	0.279632	-0.653276	-2.19939	0.310741	1.10688	-0.555835	20
ARF1	1.16884	1.53122	-0.35663	-0.378777	-0.410565	0.81204	-0.530765	-0.13519	-1.70017	11
CALR	0.866219	0.779711	0.885641	1.14637	-0.689571	-0.683067	-1.59359	-0.99159	0.27987	14
RPS17	1.21581	1.33774	0.342274	0.441063	-0.564862	-0.533155	-0.868625	-1.71564	0.345391	14
RPL23A	-0.264236	0.911432	-0.531272	-0.34392	-1.3922	-0.788429	-0.235656	0.780179	1.8641	8
SPTAN1	0.568989	0.999429	-1.34131	-1.72548	-0.434876	0.587312	0.0249032	0.163622	1.1574	21
PHB2	-0.29342	-2.33179	0.731247	0.903964	0.439677	0.357285	0.327686	-0.65357	0.518921	6
RPL23	0.429081	0.623747	0.280673	0.172583	-0.397154	-1.61566	0.606005	1.3957	-1.49498	20
SNRPD3	0.115532	0.293588	-0.212581	-0.343128	-1.0445	1.34485	0.47718	1.16966	-1.8006	19
GJB2	0.0634648	-2.40099	0.691296	0.729667	0.636163	-0.31101	0.351671	0.652361	-0.412626	5
NDUFS3	0.218299	-1.75017	0.903588	0.868831	0.568075	-1.19894	0.23107	-0.783988	0.94324	9
RPS7	1.28967	1.33578	0.60222	0.690631	-0.885312	-0.709581	-1.09181	-1.10316	-0.128435	14
HMGB1	-0.951935	-0.723312	-0.485789	-0.508368	0.615384	-1.00439	1.21693	1.7903	0.0511751	1
RPL38	0.860722	0.975569	0.276915	0.128541	-0.860545	0.674271	-0.155794	0.313167	-2.21285	2
DYNLL1	1.06356	1.37971	0.312466	0.156729	-0.00260017	-1.83236	-0.279332	0.338777	-1.13695	18
PDIA4	0.828215	0.872131	0.544364	0.712838	-0.934671	1.111	-1.10797	-1.43799	-0.587926	14
NDUFA7	0.137168	-1.33331	0.959612	0.907943	0.330338	-1.57189	0.283808	-0.794048	1.08038	9
PMP2	1.56861	1.7768	-0.183648	-0.206881	-0.859347	-0.0670595	-0.570468	-0.433488	-1.02451	13
GDI2	1.46283	1.76191	-0.0994266	-0.0994266	-1.0112	-0.0513293	-0.591796	-0.227474	-1.14408	13
NME1	1.55403	1.78578	0.135618	-0.0504648	-0.69428	-0.641438	-0.800856	-0.572526	-0.715855	13
ANXA4	-0.694134	-1.7314	0.313951	0.323218	0.487336	0.707681	0.0377259	-1.03049	1.58611	10
COMT	-0.782027	-1.8619	0.520325	0.341142	0.66211	-0.223935	0.437707	-0.652064	1.55864	15
TMED10	-0.556757	-1.06814	0.306433	0.402308	0.77893	-0.998277	0.604082	-1.18065	1.71207	15
RAB2A	0.425448	-1.15284	0.532986	0.770431	0.881237	-0.496109	0.167506	-1.96515	0.836496	9
RAC1	0.571092	0.874169	0.305758	0.314704	0.223744	-2.57275	0.185997	0.114753	-0.0174697	20
CLTC	1.16438	1.63507	-0.40881	-0.547229	-0.879994	-0.786327	0.178564	0.826261	-1.18191	7
RHOA	0.469337	0.911248	-0.385021	0.235253	0.0534681	1.83808	-1.04079	-1.2802	-0.801371	2
ARHGDIA	1.50411	1.76163	0.00568461	0.0848059	-0.800101	-0.231913	-0.774205	-0.517609	-1.0324	13
TECTA	-0.91124	-1.59753	-0.39588	-0.855887	0.307062	1.55523	0.543427	0.710335	0.64449	16
SEC22B	-1.07617	-1.38668	-0.145555	-0.378682	0.930197	0.248723	0.961325	-0.704523	1.55137	8
NDUFB6	0.173382	-1.99081	0.815217	0.890377	0.546873	-1.1566	0.465977	-0.447831	0.703413	9
EIF4A2	1.32641	1.90567	-0.498862	-0.423097	-0.393198	-0.833096	-0.0582958	0.120988	-1.14652	7
COX5A	-0.163233	-2.01451	0.714287	0.700711	0.726887	0.176283	-0.181599	-1.05659	1.09777	6
RPS25	0.872179	0.749722	0.360828	0.424279	-0.0633386	-2.5088	-0.100981	0.241068	0.0250407	20
VAT1	1.40412	1.84423	-0.135724	0.034083	-0.106377	-0.450662	-0.61941	-1.17037	-0.799887	13
RPL27A	0.671681	0.967035	0.445791	0.751524	-0.589111	-1.86696	-1.08989	0.892417	-0.182484	20
LMNB2	-0.674493	-1.45494	-0.00803691	-0.250546	0.573052	-1.30395	0.790675	1.18882	1.13941	1
ARL6IP5	-0.266964	-1.20893	0.372376	0.327914	0.787541	-1.69732	0.900556	-0.502262	1.2871	15
PEBP1	1.55992	1.64126	0.00252481	0.0349445	-1.10227	-0.198037	-1.11629	-0.281665	-0.540396	4
CS	1.02131	1.04258	1.00439	1.09743	-0.756594	-0.557144	-0.905645	-0.800465	-1.14587	14
USMG5	-0.126131	0.932609	0.340172	0.86933	0.448101	-0.858865	0.685989	-2.19657	-0.0946404	17
SRSF7	-0.602414	-2.30401	0.43334	0.374282	0.374879	-0.392978	0.749767	1.00691	0.360228	3
GPI	1.41454	1.63953	0.197792	0.259088	-0.698447	0.000731104	-0.786809	-0.863791	-1.16264	4
RPN1	-0.669704	-2.04727	0.506583	0.549377	0.644604	-0.0805991	0.447015	-0.667132	1.31713	3
RPS3A	-0.321494	0.61557	-0.0686144	-0.0188378	-1.54225	1.91808	-0.279942	0.664521	-0.967033	22
H2BFM	-0.71687	-2.27694	0.425197	0.411918	0.527611	-0.412967	0.584057	0.950645	0.507351	3
DDOST	-0.683622	-2.16486	0.276443	0.30441	0.502012	0.572787	0.242575	-0.415525	1.36578	3
GNAI2	0.0555159	-1.06439	0.698177	0.92072	0.263659	-0.382287	0.228106	-1.94125	1.22175	9
RAB6A	-0.0529273	-0.510227	-0.0862593	-0.255976	0.4136	1.27026	-0.0313907	-2.04674	1.29967	10
RAB7A	-0.178371	-1.09696	0.77604	0.411027	0.343836	-0.968168	0.430296	-1.39396	1.67626	15
NDUFA5	-0.122581	-2.22367	0.752255	0.736966	0.552928	0.0213197	0.224316	-0.857625	0.916093	6
CALB1	1.54156	1.69085	0.0281692	0.183295	-0.70944	-0.31377	-1.09642	-0.819473	-0.50477	4
SPTBN1	0.874138	1.47256	-1.02505	-1.53085	-0.430927	-0.849344	0.37556	0.60538	0.50854	18
RPL17	0.16337	0.00289269	-0.299695	-0.558652	-1.30675	1.19488	-0.0614392	1.8571	-0.991703	19
MT-ND3	0.270508	-1.13193	0.822056	1.06353	0.711708	-1.97697	0.490131	-0.400663	0.151635	9
GNB2L1	1.27853	1.39542	0.79275	0.399678	-1.28337	-0.287573	-1.07402	-0.630596	-0.590823	14
LMAN2	-0.24652	-1.87986	0.457951	0.254646	0.731921	-0.37107	0.40086	-0.915759	1.56783	15
HNRNPF	-0.079937	-0.864494	-0.36189	-0.498028	-0.0721498	-0.269297	0.981262	2.18673	-1.02219	1
RPL30	0.464707	0.867861	0.954248	1.00857	-0.0665535	0.440589	-0.912755	-1.00971	-1.74696	14
SRSF1	-0.358996	-1.75829	0.0938299	-0.249399	0.430662	-1.07085	0.682231	1.57511	0.655706	1
MTCH2	0.274101	-1.96924	0.95009	0.883494	0.579449	-0.401245	0.201282	-1.17884	0.660908	9
MYO6	-0.900111	-1.34231	-0.371296	-0.675763	-0.364726	0.142637	1.17242	1.68424	0.65491	1
MMP2	-1.22223	-0.26284	-1.19415	-1.1623	0.60022	0.574104	0.981806	1.38403	0.301359	8
VCP	1.54543	1.89982	-0.426782	-0.443696	-0.726918	-0.494013	-0.690255	-0.609493	-0.054094	13
DPYSL2	1.42397	1.86602	-0.284471	-0.453838	-0.969644	-0.318521	-0.400687	0.129343	-0.99218	13
RPS20	1.01291	1.53521	0.664376	0.529463	-1.61304	-0.835844	-0.412487	-0.576363	-0.304223	18
THY1	-0.490072	-0.579295	-0.287631	-0.0423389	0.0843274	1.60592	0.215236	-1.76622	1.26007	10
HNRNPA2B1	0.753445	0.723995	-0.413443	-0.677211	-0.727181	-0.246608	0.354095	1.78026	-1.54735	19
RPS16	0.511373	0.448529	0.500107	0.581968	0.0528047	-2.48559	0.817048	-0.280761	-0.145474	20
IDH1	1.40912	1.78999	-0.180838	-0.264753	-0.797707	-0.135072	-0.383918	-0.0575986	-1.37922	13
VDAC3	-0.219918	-1.36466	0.57048	0.590238	0.482948	1.0301	0.0999392	-1.8992	0.710072	10
ANP32A	0.186687	0.507949	0.267104	0.150226	0.379642	-2.36435	0.21711	1.22695	-0.57132	20
DSTN	1.57988	1.80216	-0.385097	-0.410523	-0.735544	-1.00721	-0.589912	-0.169734	-0.0840259	13
NDUFA8	-0.134872	-2.15604	0.56053	0.573395	0.479961	0.889066	0.0393832	-1.03025	0.778823	6
RAB14	0.183518	-0.288499	0.247873	0.304088	0.599421	-0.158779	0.281527	-2.39868	1.22953	15
NDUFA10	0.0781823	-1.99289	0.919182	0.9638	0.47973	-0.725791	0.0842137	-0.759282	0.952859	9
RAB5C	0.260892	0.383067	-0.330855	-0.411709	-0.109129	2.26196	-0.281042	-1.48941	-0.283781	22
NDUFS1	-0.0922202	-2.08331	0.665551	0.771233	0.269533	0.81274	-0.0582809	-1.10082	0.815575	6
H2AFY2	-0.761549	-2.33535	0.254928	0.281614	0.500672	-0.0647378	0.531694	0.885611	0.707119	3
RAP1B	-0.304218	-1.44556	0.987885	0.963586	0.355238	0.960374	-1.08643	-1.10755	0.676674	5
RPS11	0.312753	0.588532	0.185583	0.27226	-0.978737	-2.1331	0.501846	1.29812	-0.0472489	20
OC90	0.973262	0.949131	0.563516	0.647993	-1.50076	-1.29635	-1.05806	0.586557	0.134703	18
RPL9	0.926709	1.08656	-0.196848	0.311668	-0.134701	0.682596	-2.23297	0.136505	-0.579519	2
CANX	-0.375637	-1.914	0.487797	0.306089	0.607475	-0.078327	0.131497	-0.831988	1.66709	3
HEBP2	1.43171	1.75737	-0.478992	-0.464101	-0.107105	-1.47382	-0.0729464	-0.133567	-0.458551	7
TMED7	-0.809017	-1.59068	-0.173468	0.106632	0.913629	1.13369	0.575458	-1.15294	0.996693	10
CALM	1.40868	1.43216	0.215922	-0.12591	-0.112005	-0.208787	-1.65949	-1.04106	0.0904833	4
RPL24	0.198114	0.308166	-0.0222053	0.0806012	0.0594003	-2.43025	0.771153	1.15737	-0.12235	20
GSN	1.11255	1.51034	-0.682074	-0.913531	-0.349397	1.3089	-0.66705	-0.536973	-0.782771	11
RPS4X	0.753813	1.13892	0.366344	0.372546	-0.508661	-2.18183	0.484136	0.296152	-0.721419	20
SSR1	-0.626409	-2.2694	0.153394	0.0445817	0.706225	0.761523	0.666602	-0.330679	0.894165	3
ERP44	-0.518009	-1.2661	-0.130837	-0.0735645	-0.286349	1.9411	-0.471741	-0.521733	1.32723	10
NDUFA2	0.306262	-0.80105	0.765757	0.706971	0.608769	-0.652232	0.0292544	-2.04984	1.08611	9
RPLP0	0.915264	1.24173	-0.202	0.307736	-0.12129	1.07233	-0.755328	-0.625989	-1.83246	2
NDUFV1	-0.0936831	-1.82242	0.817821	0.906051	0.342035	0.786797	0.0510684	-1.48223	0.494563	6
HSPE1	1.03538	0.592759	0.837924	0.885676	-0.139142	-0.261126	-1.98193	-1.03453	0.0649919	14
ACAT1	0.387207	-0.318266	0.708829	0.620197	0.929026	1.17478	-1.74929	-0.983235	-0.76924	2
RPL21	-0.246248	1.01962	0.382903	0.128202	0.43281	-2.26265	0.307461	0.927327	-0.689433	20
SRSF6	-0.372265	-2.27444	0.366093	0.472359	0.414211	-0.690835	0.640031	1.06074	0.384111	3
HK1	-0.029779	-1.75337	1.03967	1.17904	0.175406	0.897578	-0.363034	-1.21675	0.0712275	5
ND4L	0.382243	-1.51696	0.967305	0.881008	0.552277	-1.6468	0.0879384	-0.475297	0.768288	9
CYB5R3	-0.550521	-1.33439	0.521729	0.976508	0.840914	0.510982	0.196429	-1.80741	0.645759	5
MYH10	-0.825598	-1.73348	0.211814	0.269977	0.13985	-0.999424	0.899868	1.40114	0.635857	1
RPS6	1.36945	1.26369	-0.131729	-0.520106	-1.47358	-0.434601	0.51172	0.558059	-1.1429	18
HEATR5A	-1.40076	-0.391134	-0.299144	0.0651288	-0.733471	-0.413628	1.20153	1.90635	0.0651288	1
RPL6	0.73545	1.33219	0.266142	0.858848	-0.933619	-0.991784	-0.503793	0.730808	-1.49424	18
NDUFS2	-0.0964238	-2.10105	0.622079	0.77373	0.31835	1.14059	0.00175634	-1.02636	0.367327	6
RPL13	0.478676	0.366649	0.62081	0.613817	-0.0714087	-2.53274	-0.0986902	0.665455	-0.0425665	20
P4HA1	1.06283	1.18171	0.450824	0.450824	-0.637668	0.886163	-1.28175	-1.04219	-1.07074	14
SDOS	0.807401	1.38813	-0.160076	-0.271333	-0.37804	-1.44661	0.398138	1.02928	-1.36689	18
NDUFA9	-0.135507	-2.25279	0.673443	0.706885	0.373628	0.687374	-0.0364897	-0.826755	0.81021	6
RPS12	0.476561	0.253752	0.0959709	-0.00806154	0.169808	1.38945	-2.32062	-0.448487	0.391627	2
RPL5	-0.783809	0.296648	-0.061835	0.677195	-0.263433	1.87787	-0.404031	-1.71339	0.374783	17
UQCRH	0.341927	-1.27131	0.730756	0.708631	0.577977	-1.27131	-0.489018	-0.850249	1.5226	5
H2AFY	-0.532521	-2.24417	0.62379	0.40918	0.445889	-0.714099	0.499033	0.653031	0.859863	3
ATP1B3	-0.634625	-1.83768	0.634202	0.708721	0.693537	-0.786108	0.271272	-0.444227	1.39491	15
ALDOC	1.57273	1.74616	-0.0477027	0.0741525	-0.947869	-0.528171	-0.736431	-0.333821	-0.799048	13
EEF2	1.35456	1.71333	-0.503907	-0.399124	-0.967304	0.615421	-0.593627	-0.158989	-1.06036	11
SLC12A2	0.335116	-1.04808	1.05689	1.20408	0.435634	-1.17843	0.0372777	-1.49074	0.648261	9
SNRPE	-0.0753784	0.0155673	-0.420361	-0.53719	-0.471421	2.32827	0.183572	0.303555	-1.32661	22
IMMT	-0.249131	-1.98926	0.574433	0.601782	0.151346	1.41769	-0.237326	-0.897421	0.627877	6
GPX1	1.5296	1.70939	0.211776	0.0795988	-0.784652	-0.744899	-0.913888	-0.330544	-0.756384	13
PCYOX1	-0.641818	-1.64649	0.431362	0.31654	0.579977	1.49117	0.272406	-1.30551	0.502361	10
H1F0	-0.619771	-1.91458	0.468871	0.927694	0.13422	-0.932601	0.564942	0.0844667	1.28676	3
SNRPD1	0.424066	0.357076	-0.124883	-0.128028	0.170358	0.27042	0.726097	0.824963	-2.52007	19
ERH	-0.859748	-2.10909	0.340533	0.18537	0.751794	-0.154654	-0.0522762	0.582248	1.31582	3
RPL3	0.605651	0.791452	0.367687	0.607567	-1.40396	0.310791	0.0972589	0.630489	-2.00694	2
NDUFV2	0.144498	-1.71361	0.759863	0.815747	0.61538	-0.174069	-0.12213	-1.4518	1.12613	9
HSP90AB1	1.56075	1.89516	-0.365867	-0.398038	-0.615827	-0.439166	-0.441438	-0.282784	-0.912791	13
C1QBP	-0.00749766	-1.59781	1.24315	1.14457	0.225567	0.797643	-1.31636	-0.405697	-0.0835667	5
MGST1	0.214987	-0.916282	0.326099	0.593344	0.929982	-1.63438	0.638924	-1.2382	1.08553	15
HNRNPK	0.560488	0.848539	-0.289447	-0.286888	-1.12729	-0.225188	0.300246	1.74745	-1.52792	19
CISD2	-0.185346	-0.75756	0.457954	0.480927	0.853556	-2.14159	0.44037	-0.308728	1.16041	15
SDHB	-0.226091	-2.21569	0.936789	1.05002	0.512325	-0.000985117	-0.0740335	-0.620191	0.637859	6
KRT18	-0.141848	-0.599459	-0.816112	-0.860012	1.21062	-0.769165	0.124266	2.02762	-0.175915	8
SUB1	0.00805816	-1.61789	0.111215	0.141227	0.484657	-1.61789	0.301799	1.16886	1.01996	15
ERLIN2	-0.383103	-1.58226	0.293273	0.402653	0.736313	-1.54252	0.671491	0.092465	1.3117	15
SLC25A13	-0.0741506	-2.15506	0.806191	0.783466	0.474631	0.483201	0.226172	-1.11731	0.572858	6
LMAN1	-0.54605	-1.87085	0.267293	0.246088	0.764068	-0.565018	0.789407	-0.573217	1.48828	15
ACADL	1.1353	0.811406	0.907829	0.946842	0.261199	-0.754721	-1.27933	-1.0206	-1.00792	14
SDHA	0.056619	-1.87252	0.866089	0.998481	0.237148	0.882774	-0.483297	-1.19102	0.505725	6
APOA1	0.892484	1.40368	-0.896286	-1.23058	-0.731362	-0.976525	0.359849	1.13838	0.0403579	18
HSD17B12	-0.552667	-1.6144	0.67446	0.70909	0.940346	0.0207949	0.740472	-1.52585	0.607754	15
HNRNPR	0.318615	0.014532	0.435634	0.463628	-0.478863	-2.13509	0.86633	1.21217	-0.696954	20
LDHA	1.51631	1.77778	0.0624536	-0.0799566	-0.877991	-0.534742	-0.65097	-0.210292	-1.00259	13
RPL19	-0.0611436	0.229686	0.453252	-0.0717129	-0.432721	-2.33124	0.387168	1.29588	0.530834	20
AC024592.12	0.142809	-1.80157	0.48794	0.49186	0.629252	0.927909	0.324539	-1.64261	0.439869	6
UQCRFS1	-0.368024	-1.35537	0.186024	0.203254	0.227331	2.05294	-0.0835302	-1.2395	0.37687	10
TST	0.820524	1.06731	0.69704	0.605504	0.073766	0.5954	-1.2536	-1.23902	-1.36692	14
HMGB3	0.501907	0.751553	0.0770894	-0.590397	0.216711	-2.29452	0.775698	0.896347	-0.334389	20
SEC61G	-0.102728	-1.10951	0.230474	0.351983	0.94241	-2.01755	0.811284	-0.0848127	0.978458	15
CALB2	1.62138	1.69143	0.0613741	0.0448698	-0.74696	-0.513873	-0.907625	-0.429568	-0.821027	13
ARPC4	1.16743	1.57272	-0.383242	-0.310436	-0.7823	1.07745	-0.690132	-0.433617	-1.21787	11
PDHB	0.582412	-0.411475	1.00062	1.25876	0.761347	-0.0348048	-1.7659	-1.04126	-0.349703	5
ERP29	1.01502	1.16534	0.294014	0.352577	-1.13434	1.00991	-1.47091	-0.90934	-0.322269	14
CNP	1.45069	1.77569	-0.172239	-0.320936	-0.452225	-0.492563	-0.342089	-0.0161775	-1.43015	13
CTNNB1	-1.14743	-1.68658	-0.587472	0.0324551	0.197696	1.50575	0.309536	0.419938	0.956112	16
RAN	1.35089	1.82129	-0.223391	-0.312142	-0.579681	-1.19883	-0.156762	0.226763	-0.928143	7
COPA	0.22806	0.240513	-0.183389	-0.127873	0.336593	-2.47548	0.673322	0.27351	1.03474	20
GBAS	-1.12962	-2.07261	0.406424	-0.247041	1.11037	0.404405	0.375709	0.561021	0.591339	3
GLG1	-0.235642	-1.11124	0.588686	0.566119	0.722278	-0.681541	0.270796	-1.63705	1.5176	15
RPS28	0.351727	0.732834	-0.720054	-0.175983	0.667189	-1.06348	-0.918429	-0.80365	1.92984	8
NPM1	0.716767	0.934395	-0.696703	-0.705653	-1.16632	1.43584	-0.875507	1.00852	-0.651339	12
NMRAL1	1.50209	1.8312	-0.0459484	-0.11584	-0.676137	-0.436031	-0.662978	-0.302459	-1.09389	13
HSD17B10	0.399929	0.0810549	0.59602	0.552348	0.36162	1.46505	-1.48799	-0.373552	-1.59447	2
NAP1L1	1.29781	1.51175	-0.379853	-0.510953	-0.063132	-1.53643	-0.393179	0.77962	-0.705639	18
GSTA4	1.51071	1.73945	0.0403538	0.0652662	-0.573246	-0.232752	-0.779153	-0.631597	-1.13903	13
ANP32E	0.98562	1.22585	-0.597436	-0.889279	0.220424	-0.340036	-0.893773	1.44304	-1.15442	21
ECI1	1.03777	0.87371	0.835358	0.922488	0.425973	-1.44327	-0.870615	-0.861497	-0.919914	14
PCBP2	1.1648	1.48952	-0.0961077	-0.387465	-0.434706	-1.35203	0.114172	0.778316	-1.27649	18
NDUFB10	0.0607847	-2.13008	0.574868	0.580602	0.349306	0.816189	-0.144324	-1.04783	0.940489	6
PLP1	0.131142	-0.451008	0.748818	1.08926	0.523416	-1.28573	0.302073	-1.84318	0.785212	9
PRDX3	0.783045	-0.0445241	1.06908	0.857975	0.421206	-0.242564	-1.83408	-1.34038	0.330245	5
SRPR	0.724298	1.6141	0.729616	0.626528	0.100255	-0.49292	-0.990136	-1.29683	-1.01491	14
NDUFC2	-0.0453765	-1.67037	0.836324	0.993226	0.58782	-1.2458	0.444565	-0.793309	0.892928	9
GNB4	-0.696044	-1.41413	0.456881	0.0679898	0.265182	1.09534	-0.694054	-0.791271	1.71011	10
CTNNA1	0.0203196	-0.0574278	0.0960863	-0.076703	0.379553	-2.42208	0.221144	0.579988	1.25912	20
TKT	1.43571	1.70314	-0.0788721	-0.162599	-1.26574	0.165254	-0.44528	-0.312326	-1.03929	13
RPL10	0.259826	0.0584936	0.59362	0.273989	-0.209216	-0.772225	0.488867	1.43968	-2.13304	19
IDH3A	0.432148	0.461567	0.305103	0.44944	1.2042	0.962277	-1.42926	-1.0495	-1.33597	2
COX7A2L	0.0572485	-1.39494	0.898936	0.917524	0.645635	-0.987558	0.126813	-1.34797	1.08431	9
TECTB	-0.769897	-1.44822	-0.487917	-0.711409	0.0319555	1.89104	0.14589	0.844709	0.503851	16
MT-ND1	0.208169	-1.63045	1.05381	1.14006	0.594713	-1.0349	0.351699	-1.08531	0.402207	9
AP2A2	0.915343	1.56575	-0.484486	-0.635781	-0.652746	-0.417688	0.311074	0.962883	-1.56435	18
ACAA2	0.948977	0.962616	0.757032	1.0087	-0.305113	0.250683	-1.38511	-1.1632	-1.07458	14
TNMD	-0.979695	-0.999906	-0.00220422	-0.576619	1.1679	-1.13882	0.861011	1.51018	0.158154	1
NDUFB3	0.150464	-1.35047	0.659253	0.919075	0.679956	-1.35047	0.450332	-1.16831	1.01017	9
HNRNPU	-0.662718	-0.810761	-0.0283725	-0.198235	-0.217456	-0.825193	1.41682	1.93747	-0.611548	1
HADH	0.48029	0.413312	0.6112	0.509002	0.192558	1.50279	-1.33821	-1.3711	-0.999838	2
NACA	1.1772	1.76549	-0.147338	0.0217498	-0.194391	-1.62802	-0.308503	0.134524	-0.820713	7
UBE2D3	1.51074	1.63774	-0.368371	-0.2195	-0.226688	-1.41404	-0.510844	0.273019	-0.682054	18
NDUFB8	-0.152929	-1.46685	0.737723	0.975462	0.567617	-1.48868	0.396614	-0.662148	1.0932	9
RPS24	0.279541	0.971744	0.124136	0.36877	-0.050988	-2.47893	-0.0310355	0.823097	-0.00633815	20
HP1BP3	-0.793357	-1.75036	0.0832008	-0.00605787	-0.177816	0.128142	0.797998	1.89325	-0.174997	1
ILF2	-0.150546	-0.133743	-0.0967892	-0.383567	-0.0531267	0.112848	0.787348	1.85142	-1.93384	19
HSPA9	0.811479	0.399363	1.08874	1.16479	0.0614217	-0.0275182	-1.21904	-1.66492	-0.614309	14
RAB11B	0.282602	0.782459	0.246583	0.109343	0.497141	-1.3516	-0.00817637	-1.86114	1.30279	17
SRI	-0.804267	-2.23724	0.374635	0.209346	1.0139	-0.275536	0.538238	0.781321	0.399596	3
ATP2A2	-0.764911	-2.00492	0.0905601	0.0640907	0.586812	0.499354	0.716763	-0.580181	1.39243	3
CSE1L	1.33792	0.508797	-0.87194	-1.04373	-0.912694	-0.0502927	-0.521094	-0.169116	1.72214	21
NDUFB4	-0.0413682	-2.14233	0.724494	0.819767	0.619082	-0.596703	0.427582	-0.702672	0.892146	9
CSNK2A1	-0.655632	-1.88576	0.0602887	0.0726988	0.855058	-1.00518	0.778382	1.08151	0.698627	3
PRDX4	0.992175	0.722017	0.622528	0.814753	-0.492834	-0.695748	-1.84275	-0.870321	0.75018	14
TSPO	0.109158	-1.89313	1.2159	0.309496	0.826329	-0.209008	0.201123	-1.25622	0.696346	5
CAPZA2	1.45542	1.89674	-0.395691	-0.381458	-0.44812	0.079902	-0.760949	-0.448572	-0.99728	13
NDRG3	0.106654	-0.765553	0.6733	0.984232	0.762445	-1.35683	-0.258476	-1.39212	1.24635	9
PURA	0.674826	1.67758	-0.489271	-0.837568	-0.21903	-0.933874	0.0347718	1.24291	-1.15035	18
MIF	1.56612	1.67475	-0.386083	-0.300319	-0.562878	-0.258282	-1.35724	-0.509655	0.133597	4
PAICS	0.154848	0.443313	-0.480302	-0.374834	0.0576147	-1.13729	1.12009	1.66287	-1.44631	19
MYH9	-0.240846	-1.05299	1.35723	1.74965	-0.377502	-0.0993081	-1.0163	-0.748798	0.428856	5
ETFA	0.413702	-0.21215	0.461322	0.544234	1.45064	0.589145	-1.9965	-0.791971	-0.458428	2
ATP6V0C	0.239274	-0.143176	0.470908	0.406256	1.18967	-2.1424	0.747752	0.197231	-0.96551	20
HNRNPAB	1.09568	1.39639	-0.199487	-0.182845	-0.944683	-1.21638	0.208893	1.00479	-1.16236	18
YBX1	-0.314683	-0.274941	0.3584	0.354996	-0.850374	2.3361	-0.11296	-0.389209	-1.10733	22
VAPA	0.305751	-0.956679	0.274761	0.0380147	0.709392	-2.13954	0.338601	0.124601	1.3051	15
CBR1	1.50096	1.78759	0.0515749	-0.0350489	-0.327876	-0.659685	-0.781301	-0.440501	-1.09571	13
ACTN4	1.146	1.55444	-0.649829	-0.802926	-0.745249	-0.977858	0.3744	0.929868	-0.828849	18
NDUFS5	0.0422345	-1.69215	0.679969	0.805457	0.729557	-1.1164	0.0711468	-0.790633	1.27082	9
ALDH7A1	1.20484	1.36312	0.692289	0.747871	-0.894345	-0.344832	-0.900068	-1.23149	-0.63738	14
RPL26	-0.438803	0.399913	0.578379	0.524036	0.4964	-2.51455	0.418371	-0.00589015	0.542147	20
ALDH6A1	0.266754	0.394268	0.586026	0.42301	0.935547	1.20687	-1.05685	-1.32498	-1.43064	2
PDHA1	0.832793	-0.222013	1.25748	1.38648	0.373047	-0.527453	-1.32797	-0.853812	-0.91855	5
OSTC	-0.473385	-1.03488	0.614898	0.809939	0.663557	-1.66195	0.57413	-0.74864	1.25633	15
APOO	0.0773266	-1.16486	0.827478	0.934547	0.514909	-1.16486	0.380463	-1.47337	1.06837	9
NDUFS7	0.0783674	-2.43957	0.820264	0.74086	0.397869	0.164639	0.225641	-0.534535	0.546462	6
CCT6A	1.35561	1.83166	-0.497673	-0.703612	-0.575444	0.51296	-0.622148	-0.306804	-0.99455	13
MYL12A	-0.502623	-0.926673	-0.370898	-0.97192	0.394439	0.941311	-1.10106	0.860549	1.67688	8
ACTN1	1.0313	1.33596	-0.476093	-0.906217	-0.675329	-1.19022	0.306761	1.27996	-0.706125	18
TMED5	-1.09454	-1.31055	-0.00947956	0.140682	0.789456	0.95714	0.262919	-1.1757	1.44007	10
TM9SF3	-0.593594	-1.0509	0.115248	0.122533	0.863786	0.901765	0.494851	-1.90102	1.04733	10
RPS26	-0.0528024	0.440474	0.0687096	0.169985	-0.322223	-1.80391	0.425215	1.88885	-0.814308	20
SSR3	-1.58708	-1.46506	0.344597	0.388082	0.617977	-0.600257	1.00438	0.162434	1.13492	15
RALA	0.44098	-0.409047	0.722051	0.466765	0.688142	0.348717	-0.647058	-2.31991	0.709359	5
SEPT7_	1.32623	1.69653	-0.0780863	-0.275404	-0.56072	-1.29661	-0.133512	0.380995	-1.05942	7
ANXA7	-0.320144	-1.42507	0.586759	0.839868	0.61638	-1.69158	0.775687	-0.316622	0.934724	15
SFXN3	-0.439709	-2.0004	0.540002	0.559435	0.646351	0.146581	0.573499	-1.1156	1.08984	15
ERGIC1	-0.537912	-1.12273	0.440461	0.547784	0.860421	-1.81468	0.773477	-0.266385	1.11957	15
UQCR11	0.45834	-1.09629	0.794157	0.882804	1.10065	-1.30043	0.719499	-1.30043	-0.258316	5
PRDX6	1.50809	1.80523	-0.137799	0.00279418	-0.760273	-0.638797	-0.584251	-0.14672	-1.04827	13
HINT1	1.56793	1.72724	0.0463451	-0.141678	-0.496622	-1.01544	-1.01544	-0.359878	-0.312459	13
CD151	-0.00769738	-0.356252	0.916063	0.937116	0.376603	-1.35122	0.0908745	-1.71633	1.11085	9
DDX17	0.346781	0.585566	-0.126373	-0.0621429	-0.538001	-1.92367	0.903287	1.49801	-0.683455	20
GJB6	-0.276235	-1.59248	0.688665	0.681085	0.935714	-1.59248	0.941154	0.361477	-0.146902	5
S100A11	1.37895	1.48012	-0.0240868	0.0197704	-0.625129	-1.5666	-0.991702	0.274506	0.0541743	18
HNRNPA1	-0.0802442	0.537799	-0.0299331	-0.660969	-1.14834	0.72734	0.492024	1.68796	-1.52564	19
APMAP	-0.543501	-1.60326	0.468379	0.44116	0.868828	-0.530314	0.399863	-1.05437	1.55322	15
CDC42	0.304533	0.439992	-0.692938	-0.618394	0.574787	2.19512	-0.605467	-0.971108	-0.626522	22
RPS2	0.337257	0.202988	0.794008	1.14784	-1.78293	0.149179	-1.2428	0.929904	-0.535455	2
RPS15	0.852381	1.15863	0.288035	-0.0593285	-1.93178	0.777317	-1.15831	0.323037	-0.249982	2
NDUFA12	0.197376	-1.50423	0.842654	0.771969	0.687186	-1.4771	0.427571	-0.854177	0.908756	9
HRAS	0.846214	0.688942	0.55845	0.700677	0.252327	-1.81563	-0.435865	-1.43202	0.636898	14
SLC1A6	-0.491729	-2.07632	0.234571	0.192859	0.423251	1.21721	0.292018	-0.786772	0.994917	3
NCL	-0.686756	-1.2812	0.739221	0.689967	-0.71351	1.21539	-0.0333062	1.23397	-1.16377	16
MSN	1.47198	1.95209	-0.362172	-0.509803	-0.79144	-0.58903	-0.479158	-0.0389413	-0.653529	13
OGDH	0.778505	0.116697	1.26158	1.4798	-0.0835481	-0.576365	-1.01764	-1.37017	-0.588867	14
PPP1CC	1.2226	1.6651	-0.0722292	-0.300621	-0.736809	-1.41172	-0.110795	0.598984	-0.854512	7
CCT2	1.39023	1.91678	-0.399434	-0.522782	-0.886708	0.0169299	-0.773858	0.0169299	-0.758087	13
DLD	0.979753	0.899469	1.07428	1.14022	-0.298338	-0.940888	-0.998944	-0.723906	-1.13165	14
COPB1	1.06432	1.44593	-0.285311	-0.44232	-0.398714	-1.96041	0.374135	0.511563	-0.309193	18
SRSF2	-0.795323	-1.97647	0.590431	0.683053	0.5068	-0.983555	0.66673	0.900383	0.40795	3
RAB18	-0.234954	-1.09342	0.492547	0.532578	0.641469	-1.82524	0.53441	-0.456613	1.40922	15
ANXA11	-0.322512	-1.51959	0.72165	0.478573	0.620986	-1.50805	0.466529	-0.304014	1.36642	15
DAD1	-0.775283	-1.77094	0.00807871	-0.117452	0.833088	1.36149	0.450041	-0.860119	0.871098	10
KRTX	-0.749509	-1.0894	-0.393305	-0.666825	1.39269	0.353847	0.792302	1.38316	-1.02295	1
EPCAM	-0.122327	-1.29895	0.531375	0.577321	0.435442	0.50682	0.326419	-2.00645	1.05035	15
ACTR3	1.2238	1.72164	0.0152405	-0.0133893	-0.68261	0.222578	-0.423938	-0.43418	-1.62914	4
DLAT	-0.0190502	-1.9134	0.872656	0.962535	1.02978	0.743472	-0.50273	-0.806087	-0.367176	5
MARC2L_	-0.066278	-1.47486	0.740664	0.706065	0.551309	-1.80572	0.34656	-0.0403289	1.04259	9
PABPC1	0.840181	1.16832	0.545596	0.636381	-0.584577	-1.82998	-0.0254022	0.416458	-1.16698	18
SRSF10	-0.738775	-1.05772	-0.312373	-0.180806	0.39323	-1.05772	0.943117	2.01055	0.000487429	1
SFPQ	0.797791	1.23988	-0.263586	-0.507756	-0.993343	-1.3034	0.592184	1.30692	-0.868687	18
UGT8	0.0836102	-0.897551	0.806718	0.54089	0.94015	-2.03963	0.70944	-0.657682	0.514051	15
OTOL1	-1.27481	-1.55837	-0.138276	-0.424802	-0.0567951	1.38999	0.777729	1.07889	0.206444	16
SET	0.765383	0.576378	-0.86723	-1.15272	0.00397087	0.347972	-0.66323	1.9002	-0.910716	21
PGM1	1.38015	1.84576	-0.269861	-0.296486	-0.673021	-0.212881	-0.435471	0.0180427	-1.35624	13
ACTR1A	1.37772	1.86771	-0.298394	-0.202659	-0.361718	0.0278612	-0.700363	-0.408425	-1.30173	13
ACTR2	1.26867	1.7418	-0.0715919	-0.0224159	-0.727451	0.433656	-0.527932	-0.763565	-1.33117	4
GSTA4	1.47155	1.71222	0.0705785	0.171507	-0.884046	-0.049444	-0.900873	-0.738755	-0.852731	13
RDH12	-0.823934	-1.52719	0.321389	0.86154	1.11648	-0.900179	0.697924	-0.758199	1.01216	15
RPS23	-0.246007	0.109262	0.362252	0.443869	-0.366175	-0.204317	0.900495	1.24862	-2.248	19
SERPINB12	0.012136	0.105949	-0.595863	-0.995498	-0.277127	2.4339	-0.0324793	0.137578	-0.7886	22
ECHS1	1.06646	0.574832	0.880424	1.04502	-0.225197	0.199517	-1.57048	-1.27383	-0.696751	14
FH	1.03723	0.932232	1.06094	1.02455	-0.550895	-0.307953	-1.1158	-1.23073	-0.849568	14
RTN4	-0.981076	-1.3204	0.136236	0.408462	0.768996	1.86145	0.29758	-0.958328	-0.212924	10
MT-ATP6	0.643785	-1.40983	1.18846	1.05484	0.355529	0.226405	0.117618	-0.582403	-1.59441	5
HYOU1	0.811015	0.652472	0.838893	0.655296	-0.856328	0.912518	-1.01928	-1.76842	-0.226165	14
AKR7A2	1.42191	1.78997	-0.0317973	-0.134132	-0.384747	-0.147802	-0.534436	-0.576267	-1.4027	13
HNRNPD	-0.343324	0.524966	-0.398725	-0.606679	-0.621942	-0.171288	0.931033	2.0105	-1.32454	19
FAM120A	-0.536117	-0.947191	0.211234	-0.0544311	0.264503	-1.74386	1.08388	1.56789	0.154091	1
ALDH3A1	-0.372905	-1.4572	0.577622	0.483346	0.913692	-1.50039	0.382232	-0.368822	1.34243	15
DLST	0.0791936	-1.16944	1.06007	1.04299	0.707911	0.903468	-1.06693	-1.38949	-0.167773	5
NDUFS6	-0.0330256	-0.391414	0.575741	0.432446	0.68558	-0.391414	-0.870705	-1.72782	1.72061	5
FAAH	-0.655327	-1.93755	0.35613	0.330359	0.603599	1.16372	0.380354	-1.03937	0.798089	3
PGRMC1	-0.446743	-1.43378	0.405544	0.402778	1.07985	-1.58189	0.835881	-0.254636	0.992992	15
RBM4B	-0.276897	-1.47041	0.170094	0.133534	0.602331	-1.48313	0.587853	1.67407	0.0625588	1
NNT	0.0833066	-1.97852	0.849868	0.922015	0.504282	-0.0265863	0.161332	-1.28062	0.764924	9
UBE2N	1.52108	1.86966	-0.346307	-0.357065	-0.367063	-1.04251	-0.57243	-0.0832068	-0.622158	13
ALDH9A1	1.29996	1.56278	0.427845	0.30455	-0.303177	-1.27024	-0.443239	-0.317915	-1.26058	18
RPL18A	0.627673	0.965967	0.0416097	0.235041	-0.29799	-2.24149	0.457471	0.903104	-0.691388	20
LMAN2L	-1.26261	-1.54879	-0.0451531	-0.0281635	0.513958	0.744837	0.530883	-0.525767	1.62081	10
RBBP4	0.869484	1.00063	-0.126942	-0.353113	-0.256968	-1.4009	-1.48329	1.28789	0.463206	18
CCT3	1.26391	1.82269	-0.198636	-0.217374	-0.41524	-1.45992	-0.366455	0.266936	-0.695914	7
TCP1	1.44887	1.94148	-0.435799	-0.529838	-0.813121	-0.277744	-0.372686	-0.0795238	-0.881632	13
PGRMC2	-0.161271	-1.50404	0.571235	0.499633	0.727303	-1.69314	0.502586	-0.152435	1.21013	15
NHP2	-0.16168	-0.787743	0.464732	0.351605	-0.150347	-0.0645945	0.490672	1.76389	-1.90653	1
DDX3X	0.236288	0.382918	0.150185	0.152825	0.0487815	-2.39831	0.668267	1.1741	-0.415049	20
CAPZB2	1.49548	1.86128	-0.127361	-0.0449569	-0.866376	-0.333261	-0.749523	-0.400268	-0.835017	13
LGALS1	-0.112996	-0.910277	0.340704	0.247654	0.592372	-0.447034	-1.5197	-0.20987	2.01914	8
PDCD6	-0.622842	-2.35072	0.439823	0.182717	0.660348	-0.290772	0.769137	0.684655	0.527655	3
OXCT1	0.830609	0.812878	0.69517	0.795526	-0.57287	0.988906	-1.13886	-1.09901	-1.31235	14
SRPRB	-0.662765	-1.86884	0.565837	0.47532	0.904133	-0.676903	0.733989	-0.62073	1.14996	15
BRT-1	1.63041	1.45676	0.226369	-0.108311	-0.574168	-1.44034	-0.812835	-0.0882512	-0.289643	18
OTOF	-0.955246	-1.84812	0.0725316	-0.102001	0.585181	-0.200359	0.764107	0.0444309	1.63948	3
RER1	-0.0729547	-0.838474	0.396413	0.484752	0.678816	-2.03048	0.806374	-0.578257	1.15381	15
IDH3G	1.06929	-0.061537	0.696747	0.973671	0.800055	-1.91245	-0.597675	-0.0993748	-0.868734	5
PLS3	1.48994	1.93916	-0.508405	-0.578921	-0.858196	-0.604674	-0.372157	-0.0844244	-0.422321	13
TM9SF2	0.225961	-0.870992	0.457613	0.457613	0.671488	-0.642618	0.270192	-1.96876	1.39951	15
STT3A	-0.790289	-2.0938	0.479854	0.423926	0.635383	1.26566	0.545325	-0.52449	0.0584285	3
GPX2	-0.322964	0.017592	-1.45918	-1.7375	0.534673	0.938766	0.341682	0.701116	0.98581	8
GOT1	1.40554	1.52206	0.409465	0.422409	-0.683878	-0.242306	-0.811941	-1.26866	-0.752696	4
COPB2	-0.160823	0.437536	-0.902319	-0.929279	0.0158936	2.05604	-0.296531	-1.04972	0.829202	22
DCN	-0.279949	-0.347181	0.101043	0.311566	0.346711	-2.40169	0.630232	0.999471	0.639798	20
PTBP1	1.05517	1.52332	-0.304165	-0.248835	-0.569059	-1.13715	0.149145	0.919653	-1.38807	18
BDH1	0.292395	-1.23364	0.945011	1.07407	0.658613	-1.05863	0.213638	-1.52936	0.637902	9
FBLN5	-0.952022	-1.30028	-0.197391	-0.449101	0.365163	-0.205916	1.43669	1.66969	-0.366832	1
MMEL1	-0.504001	-0.831014	-0.171427	-0.804873	-0.0809212	-1.01008	1.76132	1.49233	0.148668	1
CLIC4	1.56459	1.71714	-0.0223918	0.0129124	-0.959548	-0.455238	-0.58371	-0.235061	-1.03869	13
PFKL	1.26986	1.66779	-0.252907	-0.417145	-0.706993	-1.12532	0.0239089	0.635206	-1.09441	7
SURF4	-0.945011	-1.6356	0.808584	0.723771	0.535911	-0.883514	0.688885	-0.501447	1.20843	15
ACAD9	-0.0754691	-0.645761	0.830395	0.878737	0.978122	1.20005	-0.798764	-0.810419	-1.55689	5
DPYSL3	1.3647	1.60322	-0.0390496	-0.0941671	-0.696828	-1.5473	-0.104333	0.280366	-0.766609	7
MLEC	-1.01797	-1.82782	0.0429205	0.181071	0.63989	1.16765	0.300301	-0.635506	1.14946	10
SPARC	1.21336	1.31832	0.262703	0.317896	-0.771779	0.662806	-1.34239	-0.381337	-1.27959	4
MATR3	0.354894	0.793539	-0.0171414	-0.164197	-0.408177	-1.47984	0.62631	1.63474	-1.34012	19
PGD	1.37139	1.65797	0.0668533	0.150862	-0.701884	-0.0462778	-0.867775	-0.19707	-1.43407	4
JUP	-0.326308	-0.908485	0.408463	0.372381	-0.362407	1.31119	0.502923	0.943591	-1.94135	16
TMPO	-1.00139	-1.65247	0.0113654	-0.278522	0.36989	-0.680132	1.01307	1.33602	0.882166	1
CHCHD2	0.575477	-1.67286	0.660791	0.686529	0.273555	-0.989153	0.0439408	-0.976217	1.39793	9
UGGT1	-0.158611	-0.920421	0.552015	0.577687	1.09066	1.40708	-0.652335	-1.68855	-0.207528	5
FAM162A	0.0462271	-0.834639	0.93558	1.0938	0.629446	-1.35306	0.232293	-1.52973	0.780086	9
EHD3	1.20726	1.73882	-0.320473	-0.265741	0.0223685	-1.62824	-0.17918	0.210964	-0.78578	7
DPH2	0.40759	1.2291	0.317232	0.606675	-0.0922559	1.03551	-1.25142	-0.547014	-1.70541	2
ETFDH	-0.000298978	-1.6216	0.800502	0.825036	0.585558	-0.831734	0.438626	-1.28182	1.08573	9
ITGB1	-0.670071	-2.12451	0.0712688	0.145902	0.445727	1.1328	0.0195331	-0.234626	1.21398	3
CCT3	1.38248	1.81123	-0.353171	-0.157901	-0.575262	-1.25279	-0.134297	0.130113	-0.850393	7
FSCN1	1.51974	1.85618	-0.163785	-0.233321	-0.859049	-0.275537	-0.550277	-0.323033	-0.970919	13
FEN1	0.587646	1.26419	0.427988	0.56469	1.00266	-0.252963	-1.38547	-1.3557	-0.853041	14
BSG	-0.486166	-1.43503	0.146551	0.731364	-0.474867	0.999374	-0.0976829	-1.05635	1.67281	10
ATP6V0D1	-0.766938	-1.3425	0.740576	0.539486	1.10854	-1.14081	0.634714	-0.838138	1.06507	15
FLNB	1.32507	1.72661	-0.757355	-0.838337	-1.25255	-0.00559365	-0.413945	0.441989	-0.225886	11
TMEM258	-0.610294	-1.16997	0.305252	0.743285	0.873072	-1.37892	0.263982	-0.609968	1.58356	15
MPST	1.36189	1.69159	0.042329	0.346008	0.0159829	-0.773457	-1.14601	-0.585878	-0.952456	4
CLDN3	-0.0413063	-2.04565	0.675593	0.931191	0.532545	-0.534355	0.811475	-0.941964	0.612474	6
EEF1B2	1.57723	1.7011	-0.281585	-0.280779	-0.730858	-1.0923	-0.71166	0.233714	-0.414869	13
U2AF1	-1.04438	-0.829782	-0.0603418	-0.481941	-0.168226	1.65173	0.508886	1.41191	-0.987853	16
TAGLN2	1.3951	1.5573	-0.21916	-0.440134	-0.38475	-1.23761	-0.0808236	0.57869	-1.16861	7
COPE	0.681049	0.76409	-0.283683	-0.536236	0.0583156	1.44133	-2.02479	-0.496535	0.396462	2
RPL15	0.771106	0.338165	0.682146	0.387792	0.459098	-1.72206	0.0826936	0.723904	-1.72284	20
LYZ	-0.397145	-0.310997	-0.949054	-1.02946	-0.486627	2.14103	-0.0963374	0.165478	0.963115	22
PFN2	1.46756	1.38227	-0.551058	-0.661743	-0.188649	-1.54205	-0.499738	0.717863	-0.124448	18
EIF4A3	-1.37598	-0.729321	-0.0211968	0.201172	0.56826	0.783135	0.657932	1.40043	-1.48444	1
COPG1	0.914695	1.24802	-0.120788	-0.372287	-0.441424	-2.04325	0.401161	0.85357	-0.439697	18
FXYD6	-0.276461	-0.665798	0.727865	0.703683	0.575855	-1.38881	0.22386	-1.38881	1.48862	9
CCT7	1.00785	1.37467	-0.456923	-0.641659	-0.934367	1.53108	-0.771134	-0.402097	-0.707419	12
DECR1	0.559218	0.693799	0.318388	0.223076	1.208	0.636756	-0.963171	-0.754219	-1.92185	2
LAMC1	-0.580423	-1.48398	0.302453	0.122221	-0.938755	-0.423224	0.68572	1.91364	0.402348	1
MGST3	-0.223403	-2.11029	0.888711	1.07738	0.566232	0.224377	0.22322	-1.00009	0.353865	6
SCP2D1	0.199564	-1.35502	0.543004	0.73011	0.862293	1.30075	-0.161089	-0.517425	-1.60219	5
NDUFB9	-0.237027	-1.11911	1.07486	0.927326	0.406974	-1.11911	0.344709	-1.3844	1.10578	9
AKR1E2	1.12494	1.35345	-0.121634	-0.186352	-0.567	1.15435	-0.765594	-0.435415	-1.55674	4
RPS10	0.619556	1.20317	0.317071	0.268641	-0.73104	1.45523	-1.18266	-0.826908	-1.12306	2
LECT2	1.02436	1.27547	-0.396417	-0.379576	-0.762015	-1.27941	0.320836	1.25656	-1.05981	18
SEPT1_	1.38317	1.83007	-0.477009	-0.476082	-0.491723	-0.963978	-0.178996	0.35241	-0.977863	7
SUCLG1	1.09892	1.17914	0.58674	0.746677	0.0101894	-0.136303	-1.10097	-0.730295	-1.6541	14
CCT4	1.51731	1.86412	-0.19458	-0.329558	-0.886761	-0.320852	-0.537505	-0.182131	-0.930044	13
SUCLA2	0.752595	0.893204	0.842946	0.80597	0.792176	-1.4337	-0.737116	-0.631241	-1.28483	14
HNRNPDL	0.687863	-0.0411364	-0.357221	-0.913283	0.126261	-1.05136	0.578279	2.00792	-1.03732	19
PTRH2	-0.0524922	-2.09332	0.798203	0.659769	0.48493	-0.941521	0.347806	-0.302729	1.09936	9
DJ-1	1.53929	1.65205	-0.0663216	-0.0761217	-0.871334	-0.0125441	-1.28582	-0.653984	-0.225218	4
C19ORF70	-0.772919	-1.26192	0.327136	0.552019	0.615267	1.84315	-0.1416	-1.26192	0.1008	10
PSMA2	1.42333	1.79044	-0.153396	-0.161299	-0.900089	0.2595	-0.817777	-0.4607	-0.980006	13
ATP2B2	-0.746651	-1.98849	0.286571	0.284979	0.568794	0.259193	0.665612	-0.729637	1.39963	3
ATP2B2	-1.05049	-1.47712	-0.582248	-0.698764	0.676053	0.874876	0.892304	-0.00159248	1.36698	8
RPL31	0.0424095	0.325099	0.17574	0.68235	0.505985	-2.19566	0.464338	-1.02567	1.02541	20
ILVBL	-0.353442	-1.43385	0.575998	0.720725	0.930378	-1.67556	0.628635	-0.2945	0.901617	15
PARP1	-0.468664	-1.54328	0.398457	0.36752	0.54846	-1.54741	0.886473	1.27124	0.0872109	1
PFKP	1.3181	1.72666	-0.287572	-0.763872	-0.800574	-0.994529	0.209721	0.450972	-0.858901	7
AHNAK	1.4723	1.86324	-0.328538	-0.340412	-0.73594	-0.485786	-1.08689	-0.417571	0.0596006	13
NAP1L4	1.36583	1.59975	-0.224523	-0.348094	-0.326013	-0.357581	-0.81642	0.579285	-1.47223	4
NUCB2	0.917932	0.242885	0.948565	1.03956	-0.793762	-0.635386	-1.25544	-1.32768	0.863316	14
ADPGK	-0.586775	-2.26039	0.321021	0.384855	0.557846	-0.0320974	0.437851	-0.152011	1.3297	3
CIRBP	1.22461	1.41832	-0.757561	-0.642313	-1.5282	0.0869684	0.168322	0.766764	-0.736906	11
PTPLAD1	-0.283923	-1.96542	0.200379	-0.0701529	0.765905	0.148568	-0.0418745	-0.522192	1.76871	3
HMOX2	-1.15819	-1.92181	0.243435	0.339239	0.74039	0.727507	0.171028	-0.381897	1.2403	3
AC012493.2	1.77015	1.25201	0.526044	0.0764444	-0.742598	-1.11618	-0.337663	-0.920537	-0.507671	18
AIFM1	0.00140287	-2.25386	0.680121	0.686866	0.334392	0.576873	0.1211	-0.943991	0.7971	6
PSMB1	1.39698	1.75666	-0.306471	-0.348961	-0.725604	0.510641	-0.751211	-0.433045	-1.09899	13
ARPC3	1.47531	1.78365	-0.0466727	-0.187608	-0.554485	-0.0578992	-0.83417	-0.369051	-1.20907	13
EIF2S3	1.26174	1.69892	-0.216653	-0.430377	-0.442718	-0.764136	-0.0513482	0.459715	-1.51514	7
RAB10	-0.157495	-1.57355	0.552405	-0.137976	1.3892	-1.28436	1.02457	-0.420332	0.60753	15
MAGOH	0.532357	0.163562	0.404892	-0.27267	-0.0825299	-2.25367	0.737917	1.25818	-0.488039	20
RPL8	-0.202446	-0.932705	0.237682	-0.47728	-0.872112	1.78962	-0.94748	1.39414	0.0105773	22
AKR1E2	1.49252	1.73267	0.142378	0.119992	-0.799825	-0.212065	-0.813716	-0.768897	-0.893055	13
LRP12	-1.00504	1.69525	-0.0732282	-0.0469796	0.685588	1.18822	-0.418207	-1.00504	-1.02057	25
DHRS7	-0.903264	-1.85764	0.493046	0.547237	0.868326	0.395488	0.484507	-1.02509	0.997387	15
AP2B1	0.997582	1.46388	-0.155318	-0.146034	-0.346837	-1.69121	0.20173	0.771606	-1.0954	18
AVIL	1.25448	1.52787	-0.0515023	-0.158747	-0.797492	0.88527	-0.929363	-1.24161	-0.4889	4
TRA2A	-1.07743	-1.23285	0.546388	0.664818	0.531584	-1.41721	0.664818	1.35801	-0.0381211	1
SAMM50	-0.489296	-1.7654	1.20554	1.29926	0.450915	-0.295236	0.355752	-1.01146	0.249923	5
GLUD1	0.960739	0.426637	1.18517	1.22055	-0.144424	-0.572489	-0.854018	-1.58734	-0.634817	14
LRPAP1	-0.182184	-1.14901	0.342192	0.391488	0.726771	1.0811	-0.562541	-1.76491	1.11709	10
NPEPPS	1.51031	1.76365	-0.0151089	-0.0202342	-1.01689	-0.0567892	-0.647924	-0.766046	-0.750963	13
EFTUD2	-0.789592	-1.5848	0.128164	0.0122245	0.128164	-0.442278	0.969479	1.89621	-0.317573	1
EMC6	-0.262667	-1.25112	0.358294	0.520999	0.608358	-1.25112	0.840033	-1.05207	1.48929	15
ASNA1	0.953243	0.529166	-0.00759031	-0.00115263	0.786386	-2.33147	-0.116799	-0.508279	0.696495	20
GLUL	1.5141	1.74788	-0.0517436	-0.242354	-1.06736	-0.701695	-0.543583	0.146291	-0.801545	13
PRPF19	0.973454	-0.0818608	0.386554	-0.486479	0.548391	-1.91139	-0.124276	1.45417	-0.75856	20
ASPH	-0.565129	-1.56607	-0.0094261	0.235914	0.400802	-1.20409	0.849925	0.182958	1.67511	15
PSMA7	1.34342	1.78409	-0.282621	-0.617198	-1.20422	0.509512	-0.644724	-0.318624	-0.569634	13
LGALS3	0.135096	0.240079	0.724865	0.445099	0.95882	1.21515	-1.42985	-1.40904	-0.880216	2
TMEM33	-0.229233	-1.10282	0.990614	0.949147	0.919695	-1.85844	0.651639	-0.351855	0.0312527	5
LAMP1	0.00806973	-0.163036	0.00708781	0.119769	0.131837	1.59115	0.31261	-2.2877	0.280213	17
MPC2	-0.31932	-1.54457	0.921219	1.13004	0.737135	-0.26127	0.418235	-1.54457	0.4631	9
LRRC59	0.442371	-0.283318	0.0499011	0.329949	0.253671	-2.43561	0.582558	1.12792	-0.0674394	20
LAMP2	0.361223	-0.0421652	0.3211	0.662866	0.441924	-0.0541563	0.197689	-2.57285	0.68437	17
RUVBL1	0.894334	1.34211	-0.660503	-1.03467	-0.218205	-1.6683	0.508108	0.894334	-0.0572145	18
PSMA1	1.42354	1.76573	-0.292154	-0.29053	-1.05549	0.0900244	-0.450584	-0.0242735	-1.16626	13
PLOD1	0.616788	1.26285	0.30333	0.143175	-0.735216	-0.739098	0.357147	0.803898	-2.01287	18
TMEM43	-0.624112	-1.91041	0.469991	0.302463	0.688476	-0.606904	0.688476	-0.463164	1.45519	15
PSMA4	1.50615	1.8199	-0.193761	-0.220107	-0.779798	-0.0151481	-0.9456	-0.316902	-0.854736	13
GOSR2	-0.481311	-1.54263	0.597723	0.603064	0.620721	-1.4788	0.532003	-0.184367	1.3336	15
PADI1	1.30744	1.71617	-0.373375	-0.447757	-0.859446	-1.21255	-3.24118e-05	0.56249	-0.692929	7
NDUFAB1	0.399452	-0.548158	0.596	1.42254	0.367656	-0.997135	-0.800799	-1.50309	1.06353	5
REEP5	-0.737862	-1.12338	0.541009	0.70479	1.19082	-1.70578	0.661625	-0.279822	0.748595	15
PSMA5	1.53393	1.52877	-0.3104	-0.486629	-0.38141	0.430554	-1.5096	-0.256219	-0.548994	4
MANF	1.0919	0.736361	0.746105	0.730912	-0.960403	0.674989	-1.36177	-1.36177	-0.296318	14
NDUFB5	-0.206029	-1.4133	0.646609	0.910762	0.426358	0.419365	-0.0320566	-1.80262	1.05091	9
GAL1	-1.36841	-0.888273	0.277393	-0.16133	0.439763	-1.36841	1.01747	1.14704	0.904746	1
IQGAP1	1.37341	1.89044	-0.208511	-0.216593	-0.767997	-1.13976	-0.218998	0.00405774	-0.716047	7
SEC61B	-0.877105	-1.15624	0.148794	0.613224	1.03946	-1.49149	1.46867	0.103061	0.151624	8
LRP2	-0.852511	-2.27221	0.403423	0.319635	0.34899	0.475659	0.123724	0.265131	1.18816	3
CPNE1	-0.545971	-1.18413	-0.291587	-0.270181	-0.193656	2.44855	-0.0637493	-0.172901	0.273623	22
SLC30A9	-1.07535	1.74241	0.654392	1.05903	-0.605641	0.300586	-1.08955	-0.745515	-0.240357	5
LAMB1	-0.648299	-1.29338	0.256631	0.13347	-1.12098	-0.389566	0.83124	1.9014	0.329489	1
GCAT	0.041462	0.141864	1.13362	1.04622	0.649356	0.577278	-1.04543	-0.765367	-1.77901	5
RTN1	0.212131	1.2682	-0.0572254	-0.131115	0.129653	1.04748	-0.546275	-2.19938	0.276534	17
SFXN1	-0.0262457	-1.88755	0.758596	0.743947	0.594037	-0.674349	0.498482	-1.06445	1.05753	9
MRPS36	0.766615	-0.21214	1.44292	1.14334	-0.194069	0.215909	-0.984046	-1.61483	-0.563696	5
C21ORF33	1.03712	0.98929	0.84358	0.700222	0.0193825	-0.761023	-1.93215	-0.569115	-0.327314	14
SCARB2	-0.576738	-0.538651	0.047058	0.557362	0.879849	-1.1007	-0.129707	-1.1007	1.96222	15
SEC11A	-0.0208758	-1.86637	0.557558	0.407051	0.721864	-1.38358	1.0242	-0.166245	0.726403	15
COL1A2	-0.428277	-1.16997	0.0336224	-0.334106	-0.548111	0.431163	0.715334	2.14876	-0.848409	1
SLC25A22	-0.478652	-0.900806	0.602756	0.528826	0.748668	0.365658	0.349902	-2.15091	0.93456	15
GMPPB	1.11414	1.27835	-0.332223	-0.369623	-0.255088	-0.794988	0.3086	0.873526	-1.82269	18
ETHE1	1.02232	1.09394	0.655262	0.969872	0.338751	-1.27397	-1.06135	-0.843191	-0.901629	14
PPP2CA	1.37068	1.90868	-0.388169	-0.341079	-0.802626	-0.159677	-0.45468	0.0219497	-1.15509	13
DNAJB11	-0.784398	-0.899431	0.365984	0.22866	1.03077	-1.27356	-0.683826	0.231455	1.78434	8
ADH5	1.50046	1.63344	-0.0714402	-0.198696	0.0701995	0.0701995	-1.08362	-0.898782	-1.02177	4
ARL1	1.01213	1.50996	-0.823144	-0.898965	-0.210672	0.838519	-0.145982	0.258936	-1.54079	11
AKR1A1	1.48957	1.69744	0.137746	0.0543516	-0.872805	-0.0623891	-0.622636	-0.728941	-1.09234	13
NID1	-0.980951	-0.293191	0.294633	-0.0113742	-1.29466	-0.836356	0.789052	1.92323	0.409625	1
HDGFRP3	0.736619	0.0605092	-0.306453	-1.02368	-0.417668	-1.58747	0.347983	1.836	0.354157	19
ABHD12	-0.707122	-1.9609	0.506626	0.558446	0.754366	-0.768579	0.737621	-0.265791	1.14534	15
SOD2	1.03418	0.945406	1.04289	0.996573	-0.606037	-0.189812	-1.08669	-1.27964	-0.85686	14
PSMB2	1.59002	1.78686	-0.660957	-0.433873	-0.991504	-0.254646	-0.734075	-0.0471776	-0.254646	13
ARPC1A	1.27623	1.64509	0.309973	0.154034	-0.726323	0.190427	-0.741979	-0.729623	-1.37783	4
TLN1	0.896482	1.54246	0.552101	0.662222	-0.610233	-1.53776	-0.479991	0.026209	-1.05149	18
TRA2B	-0.885881	-1.70873	0.346866	0.317869	0.320119	1.1809	0.430697	1.0926	-1.09444	16
MAPRE1	1.68037	1.73431	-0.470748	-0.656638	-0.563582	-0.516413	-0.529071	0.11998	-0.798207	13
NSF	1.24665	1.54398	-0.312116	-0.550588	0.634542	-1.43734	-0.428494	0.27079	-0.967427	18
ATP6V1A	1.50927	1.89651	-0.13682	-0.408504	-0.422112	-1.03551	-0.413399	-0.374459	-0.614972	13
SYNCRIP	0.845738	0.977205	-0.278512	-0.261297	-1.30191	-0.650498	0.549337	1.43053	-1.31059	19
CCT8	1.41031	1.84007	-0.242039	-0.237463	-0.512153	-1.13056	-0.330871	0.122142	-0.919434	7
AGPAT3	-0.0198191	-1.70747	0.535062	0.46925	1.10191	-1.05648	0.601698	-0.932235	1.00808	15
FUT8	0.0491579	-0.566187	0.425928	0.32686	0.852238	-1.2498	0.627426	-1.74912	1.2835	15
PSMC5	1.45681	1.68652	-0.661586	-0.851935	-0.598	-0.720772	-0.170787	0.620442	-0.760688	7
ELAVL1	0.487306	0.710317	-0.378314	-0.567222	-0.607048	-0.786179	0.88667	1.70647	-1.452	19
CTSD	1.22763	1.19555	0.5614	0.446127	-0.396421	0.336856	-1.38516	-1.43346	-0.552513	14
CAPZA1	1.45632	1.92597	-0.3982	-0.286882	-0.28205	-0.30699	-1.1296	-0.501779	-0.476786	13
EIF3F	0.389318	-0.101494	0.0964574	-0.104843	0.915932	1.60106	-1.63199	-1.31508	0.150635	2
PSMB3	1.22105	1.59218	-0.38066	-0.518028	-0.609989	0.983786	-0.483752	-0.478871	-1.32571	11
MT-ND5	0.0987341	-1.57888	1.11503	1.14931	0.833376	-0.652358	0.33216	-1.30488	0.00751461	5
ACADSB	0.190949	-0.588983	0.327604	0.476387	0.78197	1.80232	-1.28044	-0.454095	-1.25571	2
PON1	-0.448542	-1.61314	0.406268	0.494708	0.81718	-0.186073	0.123577	-1.20885	1.61487	15
CHTOP	-1.3568	-1.49289	-0.338585	0.394151	0.721724	-0.355247	0.564564	0.239074	1.62401	8
SCAMP3	0.109151	-1.22815	0.157316	-0.226672	0.447	1.02721	0.528048	-1.91337	1.09946	10
GNA11	0.514158	-0.507499	0.877402	0.794368	0.498937	-2.15259	0.152116	-0.848656	0.671769	9
KARS	1.38936	1.87994	-0.134723	-0.136585	-1.02647	-0.648333	-0.38808	-0.000180771	-0.934932	13
ARL8B	-0.590165	0.651477	0.205726	-0.404341	1.59695	1.10595	-0.635828	-1.66552	-0.264249	2
SERPINB6	1.4589	1.73118	-0.0947827	-0.147444	-0.727064	0.0302156	-0.419736	-0.435316	-1.39595	13
NHP2L1	-0.281983	-0.281615	-0.225947	-0.545108	0.792718	1.63384	-1.52853	1.1573	-0.720677	2
METTL7A	-0.513164	-1.64821	0.317085	0.493343	0.643421	0.0694102	0.497717	-1.34397	1.48437	15
HIBADH	0.924148	0.59957	0.887842	0.992618	0.329579	-0.444496	-1.79512	-1.17603	-0.318104	14
GSTK1	0.987315	0.737482	0.483624	0.508285	1.08159	-0.254453	-1.00128	-0.761554	-1.781	14
STRBP	-0.380789	-1.24719	0.63407	0.639441	0.479405	-1.56431	0.858299	1.2668	-0.685732	1
RNPS1	-1.43417	-1.50418	1.24815	0.864495	0.0839291	-0.264743	0.0405633	1.1272	-0.161246	5
ARPC5	1.51898	1.56179	-0.0999229	-0.399941	-0.476808	0.592059	-0.676785	-1.07574	-0.943634	4
UBE2M	1.38172	1.71096	-0.813209	-0.659638	-0.535158	-1.05489	-0.141631	0.622293	-0.510444	7
BTF3L4	1.23309	1.55767	-0.430007	-0.311194	-0.859422	-1.40583	-0.706139	0.718727	0.203115	18
TOMM70A	-0.466521	-1.78112	0.968305	1.21124	0.662378	-0.563337	0.00174103	-0.86741	0.83472	9
NCLN	-0.656106	-1.80256	0.524996	0.673971	0.769728	-1.04468	0.539653	-0.250961	1.24596	15
TM9SF4	-0.0605996	-0.915342	0.423195	0.522948	0.821774	-1.16636	0.343695	-1.49323	1.52392	15
TXNDC5	1.41473	1.59876	0.264575	0.0885295	-1.05861	-0.812759	-1.23077	-0.00248399	-0.261961	4
STT3B	-0.646937	-1.92987	0.494605	0.507725	0.890197	-0.770214	0.884871	-0.430639	1.00026	15
LETM1	0.28181	-1.72219	0.793357	0.789792	0.599982	-1.3748	0.370149	-0.669076	0.93098	9
MYF6	0.368617	-1.36378	1.05173	1.16779	0.663524	-0.828879	0.754717	-0.596493	-1.21722	5
IDH3B	0.476017	-0.403396	1.17509	0.718526	1.51267	-1.13718	-0.817848	-0.373201	-1.15068	5
BSND	0.269391	-0.652525	1.28145	1.16604	0.225185	-0.548073	-0.497761	-1.87238	0.62867	5
AKR1B1	1.39088	1.75947	0.267447	0.282106	-0.707763	-0.582888	-0.672273	-0.9618	-0.775181	13
ALB	1.27731	1.67271	-0.401291	-0.444768	-1.17235	-0.961885	0.0784701	0.648474	-0.696674	7
EIF3K	0.0170606	0.0514928	0.220012	0.426967	1.77496	-1.98915	-0.367214	-0.574657	0.440535	20
PYCR1	-0.148119	-0.534359	0.512992	0.370926	1.52795	1.28728	-0.904768	-0.701443	-1.41046	2
XIRP2	-1.68107	-0.0931768	-0.59359	-1.32291	0.26672	0.743388	0.728804	0.93625	1.01558	8
LMNB1	-0.362425	-0.889762	0.228115	0.0616007	0.470048	-2.08754	0.478686	1.10325	0.998027	1
HNRNPL	0.256049	0.57329	-0.476627	-1.0803	-1.22521	0.365369	0.929529	1.65116	-0.99326	19
CAP1	1.53703	1.84534	-0.144534	-0.0226036	-0.581666	-0.482231	-0.545483	-0.64004	-0.965808	13
CADM1	-0.615379	-1.6716	0.161818	-0.0209407	0.542382	-0.853104	0.536143	0.0530089	1.86767	15
CA2	1.34637	1.62785	-0.758863	-0.763614	-1.29156	-0.00439298	-0.00439298	0.515396	-0.666798	11
ZPLD1	-0.568111	-1.32466	0.191424	-0.149511	-0.209828	2.39313	0.0256532	-0.296619	-0.061483	10
RAB21	0.498858	0.436594	0.658726	0.439364	0.317698	-2.46024	-0.120102	-0.493378	0.722484	20
CCT5	1.395	1.72841	-0.0382927	-0.129096	-0.477849	-1.48692	-0.437729	0.0867989	-0.640322	7
AP2M1	0.796803	1.52323	-1.06992	-1.07699	-0.0998176	-0.35514	0.568387	0.915031	-1.20159	18
TMX4	-1.41596	-0.956787	0.303186	-0.471648	1.0087	-0.956787	0.970677	0.152274	1.36635	8
GPX7	1.40542	1.56696	0.330424	0.00493898	-0.772449	-1.5958	-0.194602	-0.343625	-0.401276	18
ARHGDIB	1.52764	1.82879	-0.235403	-0.502624	-0.919794	-0.0128476	-0.653281	-0.193878	-0.838601	13
CTNND1	0.00741442	-0.838721	0.685119	0.414671	0.119837	-1.98887	0.470125	1.52052	-0.390093	20
MAL2	0.0564761	-0.917982	0.664957	0.412265	0.900155	-1.4389	0.742038	-1.4389	1.0199	15
HMGB2	-0.870895	0.303771	-0.32209	-0.688901	0.0789219	-1.35942	0.920214	1.967	-0.0285996	1
ADD1	1.1993	1.65946	-0.332817	-0.288577	-1.14421	-0.903852	0.141997	0.674773	-1.00607	7
LRPPRC	-0.347132	-1.80219	0.656299	0.591202	0.881931	-0.975031	0.570877	1.13589	-0.711844	1
PYGB	1.41168	1.78159	-0.0858577	0.0068795	-0.488824	-1.29482	-0.211587	-0.213652	-0.905408	13
CPD	0.116369	-0.828381	0.693251	0.79858	0.736605	-1.30364	0.304904	-1.62136	1.10367	9
GSTA4	1.29105	1.59015	-0.251037	-0.248875	-0.836142	0.870085	-0.645035	-0.538277	-1.23193	4
EMC7	-1.45883	-1.05408	0.547711	0.386916	0.673657	-1.15941	0.549514	0.0278395	1.48669	15
MAPK1	1.23662	1.61566	-0.622205	-0.626259	-0.97683	-0.790115	0.0903511	0.90004	-0.827261	7
MRPS17	-0.775703	-1.32117	1.12279	1.18262	0.930423	-1.32117	0.2335	0.378426	-0.429725	5
VPS35	1.29392	1.772	-0.250446	-0.430767	-0.947454	-0.654256	-0.00868985	0.422763	-1.19707	7
ANP32B	-0.2303	-0.542516	-0.357622	-0.380314	0.565964	-1.09078	0.804091	2.10992	-0.878443	1
KCC2D	0.816889	1.56931	-0.273071	-0.811775	-0.576136	-1.49326	-0.69754	0.816889	0.648695	18
ARCN1	1.14087	1.75443	-0.383045	-0.468953	-0.553858	-0.820417	-0.0226983	0.692838	-1.33917	7
MMGT1	-0.790706	-1.25355	0.534182	0.491343	0.877527	-0.960443	0.513557	-0.960443	1.54853	15
LEMD2	-0.498048	-2.3784	0.282157	0.208818	0.469154	-0.309843	0.707247	0.791685	0.727232	3
CTNNA2	-0.351545	-1.47736	0.439579	0.561889	-0.156562	-1.58411	1.27718	0.340089	0.950841	8
CASC4	-0.308458	-0.759982	0.512786	0.371158	0.746627	-0.628324	0.478584	-1.88849	1.4761	15
NOP58	-0.819104	-1.06804	0.631355	0.379139	0.449946	-1.31232	0.95688	1.50908	-0.726933	1
MTX2	0.202346	-2.21925	0.786683	0.90682	0.488092	-0.904836	0.199039	-0.147662	0.68877	9
SELENBP1	1.61089	1.78737	-0.0647841	-0.123607	-0.578854	-0.494949	-0.698415	-0.930529	-0.507117	13
TIMM13	0.832714	0.258816	0.0355238	-0.407159	0.373534	0.847265	-1.82933	-1.25204	1.14067	2
CHP1	-0.439466	-2.09007	0.212762	0.28215	0.519225	0.680015	0.349297	-0.838956	1.32504	3
TMED2	-0.451624	-1.60082	0.0762123	0.383519	0.931981	0.577196	0.181518	-1.43481	1.33683	10
SLC25A24	-0.226177	-0.757723	0.973354	0.845057	0.605074	-1.60786	0.332896	-1.23068	1.06605	9
WDR1	1.53042	1.71901	0.0346618	0.195796	-0.840529	-0.641769	-0.745994	-0.946078	-0.305522	13
EIF3D	0.126227	0.348681	0.535888	-0.108252	-0.333937	-2.46943	0.599218	0.922686	0.37892	20
MATN4	-0.941372	-1.85462	0.227123	-0.151734	-0.0626	-0.151097	1.06519	1.52254	0.346573	1
SLC25A1	-0.26034	-0.875366	1.14562	1.09029	0.823249	-0.875366	0.422419	-1.72549	0.254984	5
USO1	1.08192	1.4817	-0.454473	-0.682882	-0.242193	-1.76448	0.0973512	0.817269	-0.334206	18
ALDH1A3	1.52358	1.93115	-0.497604	-0.480332	-0.664572	-0.713896	-0.24733	-0.205866	-0.645128	13
TMX3	-0.574365	-1.8025	-0.0377567	0.480197	1.02356	-0.678737	0.844633	-0.546712	1.29168	15
TRAP1	-0.569522	1.07502	1.02916	-0.381659	0.936188	-2.04904	-0.245576	-0.179008	0.384434	20
HSPA4L	1.40049	1.7039	-0.0797934	-0.12625	-0.780383	-1.50697	-0.202383	0.0287888	-0.437399	7
EMC2	-0.524568	-1.75127	0.32998	0.463851	0.536747	-0.786648	0.689724	-0.576207	1.61839	15
ATP6V1B2	1.49906	1.90519	-0.345619	-0.435429	-0.435919	-0.527335	-1.0794	-0.211911	-0.368644	13
SF3B3	-0.411678	-0.28021	-0.127159	-0.150721	-0.159449	-0.90726	1.3946	1.85614	-1.21426	1
DPM1	-0.679356	-2.11504	0.807007	0.477548	0.728361	-0.11888	1.00694	-0.610743	0.504169	3
MRPS14	-0.0574925	-0.246348	-0.338442	-0.782714	-0.283306	-1.33511	1.93673	1.25432	-0.147632	8
CTBP1	1.25644	1.57432	-0.406383	-0.508645	-0.79385	-0.477535	0.0701708	0.738313	-1.45283	7
RPS21	-0.348518	-0.624788	0.0722338	-0.0548922	0.808073	1.29532	-1.09982	-1.42708	1.37947	10
PTCD1	0.389892	-1.70771	1.07302	1.1548	0.652925	-0.497958	0.608936	-0.817884	-0.856018	5
ITGAV	-0.386177	-1.90447	0.299389	0.189914	0.700827	-0.986616	0.477835	0.0595552	1.54974	15
EIF3L	0.805784	0.76028	0.274324	0.535289	0.839511	-1.54071	0.571832	-0.632043	-1.61427	20
COL9A2	-0.300328	0.263749	-0.060905	-0.394025	-1.31794	0.263749	0.856577	1.91038	-1.22125	19
SLC9A3R2	-0.370756	-0.659187	-0.902045	-1.68304	0.123967	0.99159	0.352956	0.652096	1.49442	8
DYNC1H1	1.30884	1.73541	-0.10097	-0.210821	-0.934758	-1.27574	0.00469149	0.275488	-0.802148	7
ALPL	-0.198673	-0.309247	-1.08047	-1.60521	-0.455683	1.43175	0.419568	0.710777	1.08719	23
OCIAD1	-0.172874	-0.602426	0.863854	0.94418	0.615538	-0.602426	0.110678	-2.08602	0.929493	9
HNMT	1.44351	1.74496	-0.403851	-0.299805	-1.07599	0.0849885	-0.720713	0.177002	-0.9501	13
PSMC6	1.40973	1.78793	-0.732391	-0.539017	-0.587947	-0.631384	-0.143724	0.448279	-1.01148	7
SEC61A1	-1.0116	-1.90985	0.426689	0.5866	0.550704	1.48067	0.35334	-0.0526123	-0.423941	3
NOMO1	-0.658459	-1.97082	0.357573	0.467858	0.580074	0.65625	0.388305	-1.0062	1.18541	3
LMF2	-0.409281	-2.07176	0.422627	0.370812	0.660339	-1.0233	1.02466	0.225851	0.800043	3
CDC5L	-0.727739	-1.32506	-0.0857302	-0.132109	-0.340561	0.0553071	0.130317	2.35561	0.0699744	1
TFAM	-0.199328	-2.53549	0.361041	0.581564	0.457983	0.698709	0.139588	-0.0856301	0.581564	3
EMC3	-0.518902	-2.09712	0.381265	0.508038	0.544343	-0.645962	0.817731	-0.214565	1.22517	3
HDAC1	-0.146812	0.223531	0.137347	-0.055515	-0.0269554	-1.82932	1.46144	1.2126	-0.976317	20
STX12	-0.312551	-0.717358	0.577228	0.569215	0.553947	-1.50814	0.641058	-1.26531	1.46192	15
M6PR	-0.388119	-0.598381	0.272083	0.183219	0.931539	-1.18409	0.605953	-1.4491	1.6269	15
NONE	0.740461	0.962346	-0.0842546	-0.234954	-0.4367	-0.39586	0.58292	1.03508	-2.16904	19
ADD3	1.21689	1.70213	-0.397653	-0.190137	-0.898698	0.035601	-0.392419	0.433265	-1.50898	7
EIF3A	0.330539	0.234742	0.78852	0.593014	0.540247	-2.53435	0.124529	0.215288	-0.29253	20
SLC25A20	0.0352312	-2.10449	0.751395	0.824957	0.740433	-0.378632	0.533306	-0.997281	0.595084	6
PA2G4	1.41615	1.66259	0.195071	0.285921	-0.955986	-0.119346	-0.796719	-0.595389	-1.09229	4
ATP5S	-0.918082	-2.09366	0.483614	0.212818	1.03472	-0.489594	0.509918	0.885139	0.375128	3
FTH1	1.43557	1.57074	-0.0242627	0.229344	-1.21316	-0.0744763	-1.15182	0.012028	-0.783957	4
CAPN11	1.20976	1.57197	-0.182526	-0.824157	-0.541175	-1.64587	-0.204982	0.552148	0.0648303	18
NDUFS4	-0.47964	-0.907336	0.119423	0.302357	0.294811	1.89137	0.0138819	-1.71611	0.481237	10
CBX3	-0.698059	-1.57271	0.312559	-0.404475	0.430767	-0.633176	-0.293495	1.52836	1.33023	8
UGDH	1.5086	1.71258	-0.127314	-0.663389	-0.893463	-0.37404	-0.372496	0.292355	-1.08283	13
SLC25A12	-0.255295	-0.816979	0.987457	1.07512	0.654814	-0.682838	0.115756	-1.88937	0.81133	9
VKORC1L1	-1.34538	-1.01806	0.496142	0.423428	0.890942	-1.01806	0.74335	-0.58688	1.41451	15
RBM39	-0.512093	-1.47586	0.336628	0.176402	0.108037	-0.464742	0.933167	1.848	-0.949534	1
SARS	1.3566	1.5967	-0.110836	-0.163747	-0.546092	-0.110441	-0.163322	-0.0615828	-1.79728	4
DDX1	0.939808	1.73954	-0.796633	-0.612971	-0.42426	-0.97648	0.202466	0.939808	-1.01127	18
NDRG1	1.04534	1.36321	-0.524267	-0.483717	-0.069415	-2.05999	0.271519	-0.0094683	0.466796	18
CLTB	0.955253	1.1643	-0.16591	-0.82291	-0.514216	-1.21425	-1.2343	1.12423	0.707795	18
ARPC2	1.21098	1.57197	0.103451	0.0079525	-0.713198	0.407529	-0.843579	-0.116708	-1.6284	4
TOLLIP	0.0455787	-1.38427	-0.179	-0.545386	0.223102	-1.20356	0.381884	0.798919	1.86274	8
PSMD12	1.34942	1.64942	-0.687568	-0.912507	-0.877549	0.769397	-0.350912	-0.133418	-0.806276	11
NONE	1.11384	1.86878	-0.194831	0.0628446	0.0241114	-1.54521	-0.643868	-0.648805	-0.0368667	18
PSMD11	1.49073	1.92202	-0.503834	-0.696124	-0.384227	-0.577442	-0.264462	-0.101279	-0.885374	13
NANS	1.57508	1.75812	-0.703917	-0.460989	-0.860457	-0.00792374	-0.321805	-0.0431114	-0.935004	13
ABHD12B	-0.385909	-2.2699	0.682385	0.507775	0.681947	-0.0616969	0.458124	-0.587846	0.975119	6
ALYREF	0.589807	0.719921	0.195491	0.44606	-0.735241	-0.0687373	0.642507	0.577651	-2.36746	19
GSTZ1	1.24472	1.47786	0.479677	0.474507	0.0459985	-0.457032	-1.15062	-0.91687	-1.19824	14
SLC27A4	-0.317945	-1.8599	0.409743	0.339985	0.964934	-0.669844	0.718574	-0.835407	1.24986	15
AIF1L	1.54715	1.57102	-0.368222	-0.569539	-0.824699	-0.00321575	-1.40566	-0.0755311	0.128698	4
PRKAR1A	1.1458	1.37802	-0.177104	-0.224867	0.00205674	0.823072	-0.963189	-1.74468	-0.239117	21
BIOC	1.45969	1.72797	0.0554204	-0.0758918	-0.833145	0.158223	-0.594348	-0.972701	-0.925219	13
GNAS	-0.235311	-0.662815	0.579971	0.785516	0.659253	-1.63551	0.258039	-1.16769	1.41855	9
ACAA1	0.0447891	0.139948	0.613872	0.559643	0.808567	-2.08142	0.363903	0.792434	-1.24174	20
STXBP1	1.13247	1.44659	-0.257193	0.0056353	-0.0655927	-2.02423	-0.365595	-0.332962	0.460877	18
AHCYL2	-0.648038	-1.52299	-0.148674	0.756243	0.240461	2.06283	-0.148674	-0.575421	-0.0157307	10
ACO1	1.51249	1.73392	0.00912938	0.0847983	-1.0688	-0.728674	-0.465433	-0.200871	-0.876562	13
SCAMP1	-0.311919	-0.43226	0.243957	0.389517	0.939145	-0.784659	0.598936	-1.97085	1.32814	15
PREB	-0.593377	-1.89873	-0.0452298	0.164032	0.680554	1.00787	0.624407	-1.00492	1.0654	10
NONE	-0.761106	-2.23545	0.198439	-0.0535097	0.296432	0.983818	0.597883	-0.0103249	0.983818	3
DARS	1.39089	1.85385	-0.259844	-0.567677	-0.944154	0.0831295	-0.528945	0.00268338	-1.02993	13
SNRPB	0.480735	0.733236	0.320196	0.217411	-0.243173	-1.09749	0.532279	1.12367	-2.06686	19
CDH3	-0.626401	-0.313718	0.987461	0.825445	-0.407387	-0.313718	-1.15333	-0.869682	1.87133	5
AHCY	1.52442	1.81279	-0.183276	-0.122131	-0.858431	-0.635638	-0.215131	-0.287425	-1.03518	13
DNAJC10	-0.186611	-1.06028	0.589551	0.667075	1.11563	-2.10191	0.330463	0.138896	0.507187	15
POR	-0.713891	-2.15275	0.272726	0.0856876	0.527361	0.826905	0.414993	-0.457311	1.19628	3
TCEB3	1.19927	1.2527	0.720212	0.541456	-0.616504	-1.77958	-0.311193	-0.626508	-0.379857	18
GALE	1.53613	1.78435	-0.584218	-0.61182	-0.797041	-0.714104	0.0754963	-0.764291	0.0754963	13
FAF2	-0.403804	-1.88208	0.540355	0.469562	0.956373	-1.04095	0.725934	-0.409222	1.04383	15
FAM3C	-0.0389995	-1.1878	0.345217	0.371484	0.750898	1.12777	0.0762917	-2.03489	0.590028	10
PRKACB	0.535109	0.971259	-0.0469636	-0.348169	-0.00226017	1.42474	-0.32148	-0.0895852	-2.12265	2
KPNA4	0.681233	1.03465	-0.519019	-0.615431	-1.12737	0.775295	-0.52521	1.49433	-1.19848	21
CD99	-0.0967091	-0.709766	-0.0676479	-0.191116	-0.0792329	-1.46097	0.968279	-0.41173	2.0489	8
SCAMP2	-1.02073	-1.05772	0.0235567	-0.103583	0.526649	0.519127	0.31929	-1.16286	1.95627	10
SLC1A3	-0.630512	-2.0115	0.473526	0.469055	0.886634	0.859959	0.427533	-1.04077	0.566074	3
SEC13	1.66735	1.3797	-0.51052	-1.0261	-0.484298	-0.639379	-0.522797	0.801824	-0.665784	18
BLMH	1.44747	1.68221	0.151504	0.0261474	-1.04353	0.148053	-0.776923	-0.803467	-0.831466	4
MRC2	-0.375069	-2.0031	0.194806	-0.128003	0.217452	-0.386551	-0.033181	0.790145	1.7235	3
GGT5	-0.75631	-1.01709	-0.644981	-0.705087	0.114793	-0.533131	1.04612	0.549858	1.94583	8
ATP6V0A1	-0.353255	-1.68661	0.137151	0.218434	1.20808	-0.978555	0.763147	-0.583025	1.27463	15
NOP56	-0.941999	-1.9176	0.477026	0.449294	-0.0749918	-0.337885	0.860398	1.46476	0.0209997	1
CPT2	0.228042	-0.411009	1.05443	1.28652	1.21304	-0.689319	-1.24667	-1.20824	-0.226805	5
GNAO1	0.33904	0.986704	0.478675	0.559692	0.101527	-1.13525	0.00554241	-2.11323	0.777301	17
SLC2A1	0.218765	-0.24902	0.490758	0.730631	0.517869	-1.18994	0.16404	-1.94951	1.26641	9
TIMM50	-1.09233	-0.952317	0.986778	1.16091	0.85162	-0.979155	-0.0885479	-0.913074	1.02611	5
ARF6	1.23589	1.76317	-0.251476	-0.0899822	-0.453765	-0.481242	0.118136	-0.163113	-1.67762	7
CAND1	1.33401	1.72039	-0.112401	-0.200736	-0.740009	-1.05658	-0.0319528	0.294053	-1.20677	7
PRKAR2A	1.29684	1.60588	-1.09224	-0.805686	0.242657	-1.35241	0.0302871	0.0904462	-0.0157676	18
CNDP2	1.34917	1.51344	0.23452	0.0578835	-0.626453	0.51833	-1.00212	-0.828739	-1.21603	4
OTUB1	1.47553	1.77364	-0.17569	-0.417638	-0.530636	-0.184891	-0.695163	0.0473112	-1.29247	13
HNRNPA0	0.421141	0.61324	-0.807022	-0.935529	-0.329587	-0.365495	1.09487	1.64274	-1.33436	19
FKBP10	1.26511	1.60282	0.111585	0.221175	-0.888215	-0.92391	-0.796754	0.515467	-1.10727	18
PSMD3	1.40666	1.8264	-0.412762	-0.738875	-0.57453	-0.437203	0.0447745	0.0850445	-1.19951	7
TMEM11	-0.327599	-1.14609	0.835368	1.08265	0.941967	-1.14609	0.635337	-1.36552	0.489974	5
CTNNA2	-0.566729	-1.39838	0.501019	0.370785	-0.127281	-1.39573	0.495632	0.398405	1.72227	8
C7ORF55-LUC7L2	-0.459827	-1.61076	0.530812	0.478293	-0.370077	-0.106239	0.216904	2.00503	-0.684134	1
RNH1	1.59026	1.64761	-0.331471	-0.16654	-0.843317	0.0988471	-1.08309	-0.0632939	-0.849002	4
SERBP1	1.57059	1.65859	0.0171188	0.263149	-0.971194	-0.545283	-0.977583	-0.530759	-0.484628	4
COLEC12	-0.369539	-1.73798	0.319213	0.18963	-0.0563985	-1.29077	0.746959	1.27304	0.925842	1
POFUT1	1.07122	1.45903	0.587896	0.542981	-0.530165	0.0868153	-1.11564	-0.638435	-1.4637	14
GNAQ	0.109607	-0.897103	0.305259	0.413698	0.481721	-1.54429	0.385519	-1.01922	1.76481	15
LRP1	-1.00629	-1.96524	-0.0175431	-0.11637	0.455828	0.20625	0.158463	0.806617	1.47828	3
PSMD4	1.42766	1.93623	-0.290933	-0.511691	-1.03434	-0.348525	-0.68762	-0.0432113	-0.447571	13
EPHX1	-0.876503	-1.4779	0.602397	-0.0336906	0.333763	1.89765	0.617402	-0.642871	-0.42024	10
EMC1	-0.483284	-2.0356	0.491093	0.448995	0.639033	0.756005	0.458157	-1.12527	0.850866	3
PIGK	-0.81165	-2.06328	0.294742	0.117393	0.807226	-0.0131072	0.476176	-0.238588	1.43108	3
FKBP4	1.32938	1.75492	-0.235279	-0.247498	-1.49953	0.0723645	-0.614659	-0.632068	0.0723645	4
HSPA4	1.4326	1.81481	-0.223149	-0.143694	-1.20265	0.054086	-0.565297	-0.324309	-0.842398	13
PSMD7	1.29839	1.74169	-0.861151	-0.903751	-0.836885	0.660187	-0.451598	-0.0293902	-0.617499	11
SNRPA1	0.17814	1.14234	-0.314265	-0.281823	-1.04188	1.09895	-0.0349468	1.02532	-1.77184	19
FUNDC2	-0.084493	-2.20516	0.696516	0.767648	0.751217	-0.538886	0.224596	-0.538886	0.927446	6
KDSR	-0.517303	-1.8201	0.398302	0.328102	0.975741	0.1947	0.75168	-1.2847	0.973585	15
SEC23A	1.36124	1.71907	-0.776149	-0.931987	-0.687055	0.115358	0.0255041	0.255478	-1.08146	11
PSMD6	1.38972	1.92919	-0.663173	-0.625699	-0.238045	-0.286059	-0.396377	-0.0050304	-1.10453	13
CD81	-0.801314	-0.834623	0.800722	0.163111	0.389931	-0.834623	0.643413	-1.28299	1.75637	15
UQCC2	-0.409004	-0.881144	1.22664	0.723665	0.904866	-0.881144	0.0843329	-1.63522	0.867011	5
CSRP2	1.42237	1.54238	-0.985774	-0.981973	-1.00243	-0.146078	0.174832	0.538276	-0.561602	11
PSMC3	1.49683	1.79565	-0.593483	-0.902791	-0.513326	-0.457879	-0.641059	0.391177	-0.575117	13
RAC3	-0.687211	-1.74681	0.757898	0.0660937	0.542119	0.523998	-0.841002	-0.219375	1.60429	10
HEXA	1.11395	1.2136	0.485167	0.534653	-0.508168	0.602374	-1.13014	-1.46826	-0.843182	14
DDX6	0.694404	0.949392	-0.699695	-0.536732	-0.425541	-0.533089	0.956431	1.27672	-1.68189	19
ACSL1	0.488922	0.593814	0.365765	0.287138	0.519318	-2.61066	0.320059	0.0615397	-0.0258997	20
EFHD1	1.68288	1.71926	-0.475353	-0.289727	-0.92158	-0.230922	-0.885956	-0.166241	-0.432369	13
COL14A1	-0.493439	-2.05715	0.357022	0.227447	-0.184152	-0.442707	1.06387	1.40278	0.126325	1
RBMX	0.569284	0.831131	0.234379	-0.149129	-0.929019	-0.391634	0.717636	1.13775	-2.0204	19
PTPRQ	-1.4526	-1.61793	-0.675943	0.424696	0.118905	0.647251	0.808903	0.768356	0.978367	8
FAM129B	1.2443	1.81369	-0.148014	-0.152023	-0.486	-0.627652	-0.195921	0.112394	-1.56078	7
HDLBP	1.18572	1.7957	-0.234961	-0.370389	-1.10823	-0.73383	-0.119574	0.602184	-1.01663	7
PSMD1	1.37756	1.84422	-0.537666	-0.585877	-0.406241	-0.782603	-0.208973	0.357745	-1.05816	7
SLC25A15	-0.637906	-0.728203	0.566448	0.803056	0.741572	0.91828	0.185501	-2.14103	0.292286	5
EIF3E	0.074436	0.571068	0.623541	0.372397	0.925526	-2.38583	0.233642	-0.682508	0.267726	20
NCSTN	-0.283941	-2.25247	0.522553	0.239562	0.534194	-0.0831043	0.428409	-0.457916	1.35271	3
SNTB1	0.0383782	-1.55835	0.681387	0.156404	-0.0603439	2.04803	-0.52371	-0.780378	-0.00142354	10
HSPB1	1.55	1.70133	-0.250568	-0.459802	-0.279936	0.0563721	-1.35776	-0.332748	-0.626896	4
CHMP5	1.49123	1.53192	-0.22848	-0.141812	-1.43451	-0.555815	-0.925446	-0.0914502	0.354362	4
CORO1C	1.38301	1.60666	-0.319996	-0.615223	-1.44997	-0.333023	0.130236	0.396685	-0.79837	7
TSPAN13	-0.22851	-1.53579	0.188453	0.0720377	0.563441	-0.729529	0.397235	-0.729529	2.00219	15
AK2	1.11746	1.06651	0.965787	-0.00367382	-1.15677	0.431002	-1.3118	-1.19535	0.0868386	14
DNAJC3	0.594794	0.169234	0.212539	1.05458	0.525958	0.614666	-1.66678	-1.72594	0.220944	2
PLOD2	0.732272	0.960953	0.641141	0.462989	-0.274634	1.01833	-0.657242	-1.76776	-1.11605	14
BCKDHB	-0.573146	-1.64177	1.24223	0.94755	1.06891	-0.739253	-0.751884	0.524249	-0.0768824	5
PDCD6IP	1.43184	1.89457	-0.495574	-0.335309	-0.818421	-0.0508606	-0.587344	-0.0475492	-0.991351	13
DHRS7B	-0.215896	-1.51476	0.817164	0.895436	0.792743	-0.373498	0.192359	-1.56331	0.969764	9
TRAPPC3	1.16374	1.67634	-0.53118	-0.932303	-0.591816	1.05061	-0.387423	-0.850145	-0.597821	11
HSDL2	0.940247	0.845667	0.85056	1.05807	0.0986544	-0.359767	-0.580763	-1.50541	-1.34726	14
SNAP23	-0.86957	-1.27988	0.771749	0.220269	0.764903	-0.356469	0.738352	-1.35561	1.36626	15
TPD52L2	1.52686	1.62049	-0.557789	-0.709187	-0.325984	-0.677546	-0.698301	-0.850762	0.672217	4
LPGAT1	-1.17029	-0.923442	0.122804	0.431223	0.883093	-0.324283	0.68511	-1.29754	1.59332	15
DSP	-0.00639324	-0.509943	0.423345	0.405781	-0.423268	0.979945	0.59	0.826459	-2.28593	19
RCN2	0.633054	0.571155	0.470143	0.43436	-0.749944	1.50914	-1.44231	-1.3936	-0.0320091	2
TSN	1.35164	1.80785	-0.453644	-0.525104	-0.63273	0.14799	-0.611506	0.17851	-1.263	13
NAPB	-0.117269	0.454274	0.773774	0.585817	1.26666	-2.10894	-0.607813	-0.562612	0.316111	20
FMO3	-0.293696	-2.49848	0.378736	0.383623	0.371205	0.682008	0.459557	-0.206727	0.723779	3
TMEM35	-0.660546	-1.70113	0.416542	-0.0164383	0.845463	-0.239246	0.609409	-0.866865	1.61281	15
CST3	0.80642	1.14236	0.31051	0.302823	-1.47178	0.997996	-1.56323	-0.500159	-0.0249385	2
SLC25A10	0.126615	-1.25533	1.20107	1.16955	0.438678	-0.458561	-0.291204	-1.62234	0.691528	5
EIF2S1	1.30567	1.7754	-0.181914	-0.391985	-0.854096	-0.754112	0.103639	0.255309	-1.25791	7
PAFAH1B1	1.3447	1.6643	-0.0338519	0.0315123	-1.37289	0.162996	-0.256084	-0.412633	-1.12805	4
ACADS	0.975147	0.642744	1.006	1.12265	-0.166249	-0.0583892	-1.27466	-0.821332	-1.4259	14
PSPC1	0.964294	1.05233	-0.237435	-0.955485	-1.28367	-0.0647686	0.387544	1.3299	-1.19271	19
RCC2	-0.568067	-0.503678	-0.273939	-0.397219	-0.567076	0.330602	1.40219	1.80965	-1.23246	1
ITGA6	-0.485267	-2.43838	0.723588	0.745463	0.205959	0.294762	0.32205	-0.0758061	0.707634	6
ACOX1	0.470274	-0.259276	1.39519	1.28843	-0.773086	-1.72466	-0.12532	0.354296	-0.625842	5
RSU1	1.56769	1.85241	-0.634374	-0.496315	-0.537558	-0.294369	-0.858879	-0.00799169	-0.59061	13
ANXA1	-0.936752	-1.29397	0.16163	0.169743	-0.301372	-0.849707	1.29795	1.70089	0.0515768	1
OPA1	-0.431589	-0.645576	1.07464	0.938914	0.618868	-0.91304	0.0504969	-1.74304	1.05032	9
DNAJA4	1.09508	1.6674	-0.601391	-0.779477	-0.691599	-0.751364	0.200639	0.91993	-1.05922	18
GORASP2	0.0880475	-1.08535	1.29007	0.780439	0.9554	-0.515537	-1.55701	-0.66253	0.706473	5
PAFAH1B2	1.29635	1.46221	-0.0676683	-0.152415	-1.11517	0.615303	-0.691128	0.083199	-1.43067	4
LEPRE1	0.72427	1.33242	0.580056	0.59856	0.277254	-1.95316	-0.138732	-0.916798	-0.503875	20
SUN2	-2.12625	-0.401702	0.040165	-0.1357	0.0436961	-0.401702	0.992884	1.28697	0.701633	8
PGM2	1.38618	1.72887	-0.145135	-0.0728785	-0.317265	0.289459	-0.940414	-0.705438	-1.22338	4
SEPT11_	1.46534	1.82495	-0.642772	-0.223705	-0.735115	-0.302446	-0.67222	0.243167	-0.957205	13
GLB1	1.06058	1.32004	0.293697	0.259397	-1.0088	0.756839	-1.56074	-0.157783	-0.963235	2
MRPS23	-0.337603	-0.929563	1.03262	0.910093	0.494752	0.743248	-0.679027	-1.86367	0.629147	5
BRD4	1.55147	1.66246	-0.905579	-0.633858	-0.800937	0.128826	-0.737622	0.29779	-0.56255	13
SULT1B1	1.51458	1.71464	-0.366968	-0.602445	-0.424153	-0.129685	-0.236152	-0.0508863	-1.41893	13
LONP1	-0.249801	-1.63419	1.12399	0.677256	0.327548	-0.911502	0.108844	1.38333	-0.825482	5
ACSL4	-1.39904	-0.187134	0.0238489	0.196699	0.713499	-1.3597	0.378216	-0.215952	1.84956	15
ZNF326	-0.411751	-1.50019	-0.172336	-0.330131	-0.105479	-0.454972	1.02155	2.04244	-0.0891302	1
EPB41L2	0.521905	0.632595	0.505801	0.359376	-0.373333	-2.54786	0.179818	0.457632	0.264065	20
AP3M1	0.543481	0.831587	0.791165	0.245767	1.22264	-0.692268	-0.235599	-0.790417	-1.91635	5
DDB1	1.048	1.66352	-0.38761	-0.846167	-0.622498	0.829426	-0.0795815	-0.132378	-1.47271	11
VCL	1.38568	1.82999	-0.416242	-0.617684	-0.47942	-1.18187	-0.130366	0.282719	-0.672798	7
TXNL1	1.48354	1.60341	-0.359627	-0.0761419	-1.25342	0.293274	-1.02182	-0.0448227	-0.624389	4
CAT	0.210899	0.188084	-0.201339	0.241841	-0.744721	1.78418	-0.142863	0.59097	-1.92706	2
PRPF8	-0.2049	-0.642252	0.439536	0.31671	0.261076	-2.22242	0.835077	1.24365	-0.0264702	20
ILK	0.863617	1.3062	-1.29278	-1.48193	-0.471881	-0.194972	1.12469	0.342032	-0.194972	21
OTOG	-0.48333	-0.782509	-0.153515	-0.52442	-0.609212	2.5172	-0.0975057	-0.187954	0.321241	22
DCTN2	1.48463	1.55323	-0.129083	-0.421664	-0.84109	-0.250189	-1.54498	-0.0274042	0.176548	4
PAPSS1	1.3529	1.76888	-0.456635	-0.710393	-0.965309	0.110057	-0.30179	0.299129	-1.09684	11
TWF2	1.42683	1.68527	-0.532438	-0.662072	-1.01313	0.671259	-0.777105	-0.433967	-0.36464	4
PSMD14	1.44754	1.95333	-1.00812	-0.559058	-0.623934	-0.325243	-0.302414	-0.244597	-0.337504	13
EIF3B	0.950539	0.874904	0.499665	0.0104039	-0.0678007	-2.43974	0.180419	0.209985	-0.21838	20
ARVCF	-0.361068	-2.43514	0.740947	0.717355	0.46751	-0.347106	0.503661	0.237296	0.476543	6
DKC1	-0.760325	-0.244515	0.409881	0.304199	-0.177247	-0.244515	0.969454	1.60899	-1.86592	1
RAB4A	0.787129	1.07577	-1.30036	-0.899022	0.010443	0.816341	0.592909	-1.57098	0.487769	21
UBXN4	-0.599948	-1.86292	0.492212	0.239224	0.77172	-0.656322	0.710393	-0.529283	1.43492	15
SNX6	1.53624	1.79975	-0.234424	-0.512201	-0.722163	-0.167635	-0.536909	-0.0475759	-1.11508	13
SNRNP200	-0.463159	-1.08999	0.155604	-0.0531879	-0.0331612	-1.13147	1.23125	1.87848	-0.494366	1
CDK5	0.928539	1.63325	0.4928	-0.182963	-1.22563	-0.82653	0.167008	0.371115	-1.35759	18
SEPHS1	1.33643	1.66446	-0.195635	-0.82588	-0.596846	0.328273	-0.57208	0.23175	-1.37047	11
NONO	0.394756	1.03603	-0.422987	-0.499571	-1.58843	-0.132843	0.641073	1.55622	-0.984251	19
STX7	-0.322716	0.202057	-0.400187	-0.765716	-0.538497	-1.38071	0.663448	0.483636	2.05868	8
HNRNPM	0.852799	0.921769	-0.150903	-0.817691	-0.816534	-0.225509	0.344872	1.50913	-1.61793	19
TFRC	-0.56029	0.120641	0.470545	0.446979	0.952985	1.37983	-0.278875	-2.02597	-0.505854	17
DHX15	0.105612	0.444952	-0.127536	-0.609805	-0.739847	-0.704486	1.0056	1.91778	-1.29227	19
BCAP29	-0.254295	-0.809075	0.421282	0.797293	0.864349	-0.266133	0.39973	-2.1298	0.976645	15
EPRS	1.30497	1.92233	-0.157267	-0.233693	-0.807978	-0.873822	-0.390218	0.193002	-0.957319	7
IARS	0.224886	0.328321	-0.480764	-0.531668	-0.247769	2.43455	-0.0969107	-0.798997	-0.831645	22
JAM3	-0.923585	-1.63808	0.110051	-0.0934832	-0.0386446	0.497235	0.845725	-0.543458	1.78424	10
TOMM22	-1.04112	-0.761837	1.10125	1.30019	0.541254	-1.10382	-0.370929	-0.761837	1.09684	5
TARDBP	0.795628	-0.713335	-0.67818	-0.940596	-0.675031	1.56689	-0.333351	1.49232	-0.51434	22
NUP210	-2.32013	0.686607	0.310116	0.311181	0.713679	-0.689232	0.215581	-0.172262	0.944465	8
STOML2	-0.650884	-1.61829	0.397181	0.426364	0.468487	1.45441	-0.132812	-1.22251	0.878055	10
PSMD2	1.46564	1.72638	-0.266899	-0.333257	-0.536327	-1.36944	-0.319495	0.239146	-0.605754	7
PIGT	-1.63795	-1.30746	0.26425	0.316259	0.783376	-0.510861	1.11345	-0.160233	1.13917	15
LTF	0.725696	0.916419	-0.426383	-0.364499	-1.38615	1.73134	-0.684623	0.376667	-0.888466	12
SF3B14	-0.381236	0.19933	-1.37927	-0.548445	-0.5092	0.869273	0.711589	1.85161	-0.813652	19
PSMC1	1.37007	1.85085	-0.667297	-0.620173	-0.784284	-0.239459	-0.286355	0.366055	-0.989406	7
SACM1L	-0.589708	-2.21871	0.167569	0.159907	0.596192	1.38758	0.366606	-0.289799	0.420362	3
KPNB1	1.15847	1.93483	-0.4453	-0.410471	-1.02206	-0.102636	-0.301632	0.326683	-1.13788	7
VPS26A	1.29338	1.7642	-0.498141	-0.487897	-0.929133	-0.0417558	0.115311	0.137323	-1.35329	7
EIF3M	0.483046	0.618412	0.481927	0.717718	0.81847	-2.31597	0.137833	-0.205093	-0.736348	20
PRPS1L1	1.28107	1.53405	-0.236082	-0.410539	-0.68015	0.115632	-0.297762	0.433981	-1.7402	11
Q5F3W7	0.705648	0.755118	-0.380738	-0.669838	-0.113295	-1.01042	0.337288	1.7881	-1.41187	19
MRPS33	-1.02992	-0.787868	0.605375	0.999542	1.05198	-0.787868	0.238651	-1.39527	1.10537	15
PAM16	-0.615242	-1.58943	0.539633	0.556805	0.414009	1.29407	-0.22004	-1.31405	0.934245	10
TMEM30A	-0.513413	-1.50702	0.328984	0.471512	0.638474	0.58122	0.707399	-1.70244	0.995279	15
TMCO1	-0.64191	-1.83872	0.697815	0.903419	0.872885	-0.841761	0.90864	-0.58064	0.520274	15
SEC24C	1.26666	1.7473	-0.50826	-0.683608	-0.980463	-0.0623328	0.000359499	0.431059	-1.21072	7
SUMF1	0.469469	1.17548	-0.019484	0.489419	-1.13457	1.60907	-0.696313	-0.897203	-0.995866	2
AP1M1	0.92336	1.77147	-0.262535	-0.73952	-0.759159	-0.392018	0.256354	0.668588	-1.46654	18
PSMC2	1.39397	1.81212	-0.840652	-0.619418	-0.900747	-0.353544	-0.183994	0.422821	-0.730559	7
SNX12	1.17837	1.53389	-0.774361	-1.18368	-0.627396	-0.0159764	-0.500809	1.07167	-0.681711	11
HSPBP1	0.833015	0.903053	-1.24985	-1.39896	-0.189625	0.225021	0.334593	1.41714	-0.874385	19
PCCA	0.856655	0.356302	1.24243	1.33864	-0.186014	-0.651719	-1.27033	-1.23622	-0.449735	14
USP5	1.53122	1.7623	-0.335933	-0.49949	-0.719652	0.228269	-0.706166	-0.227689	-1.03286	13
LEPREL4	0.769025	1.39022	-0.604274	-0.286284	-0.16842	-0.514628	-0.103052	1.27668	-1.75927	18
UGP2	1.43707	1.77715	-0.206164	-0.519097	-0.940648	0.239033	-0.499255	-0.172974	-1.11511	13
DNAJA3	-0.737532	-2.37467	0.450925	0.469467	0.842109	-0.0212559	0.434118	0.300515	0.63632	3
XPO1	1.23667	1.48453	-0.553808	-0.560839	-1.01795	-0.838075	0.503122	0.773642	-1.0273	18
SF3B1	0.0862665	-0.577517	0.42244	-0.35742	-0.0682699	-1.03815	1.16213	1.7427	-1.37218	1
AK1	1.55208	1.6824	-0.947092	-0.321128	-0.504563	0.351407	-0.636261	-0.210841	-0.965994	13
HINT3	0.0106941	0.790474	-1.07807	-1.0338	0.161011	-0.912189	-0.196865	0.208429	2.05032	8
CCDC47	-0.143613	-2.32533	0.510121	0.408069	0.556517	-0.0707335	0.673487	-0.610654	1.00214	3
CPT1A	-0.218876	-2.32579	0.727344	0.776984	0.514933	-0.0440174	0.576322	-0.640156	0.633258	6
PDIA5	1.22571	1.5094	0.332656	0.472099	-0.717623	-1.71493	-0.4049	-0.253185	-0.449222	18
NGFR	0.490486	-0.801855	-0.580828	-0.907093	-0.858466	-0.787871	0.496128	1.43837	1.51113	8
GLT8D1	-0.0953087	-1.09249	0.0648525	-0.112263	0.742979	0.231022	0.632113	-1.87466	1.50375	15
ECI2	0.529463	0.236431	0.746141	0.841777	1.03436	-1.57806	-1.64132	0.170661	-0.339457	5
DNAJC11	0.158048	-2.47349	0.821972	0.755232	0.339341	0.0703026	0.197697	-0.405247	0.536145	6
KATNAL2	1.21345	1.52023	-0.144089	-0.0996396	-0.249061	-0.0887215	0.0682148	-2.01743	-0.202953	21
SNRNP40	-0.79723	-1.85027	0.137428	-0.151148	0.255696	1.32094	0.280756	1.32035	-0.516517	16
MAGT1	-2.31889	0.24588	0.149219	-0.0204062	0.625903	0.24588	0.481453	-0.621294	1.21226	8
PCCB	0.472783	0.516053	1.24543	1.23165	-0.187762	0.155458	-1.1584	-1.61327	-0.661939	14
IPO5	1.3251	1.76688	-0.151802	-0.413575	-0.928245	0.249263	-0.360154	-0.123887	-1.36358	13
DR1	-0.653342	-1.52407	-0.53924	-0.53552	0.545175	0.161909	-0.301338	1.74531	1.10112	8
GIPC3	0.129579	-1.02675	-0.572784	-1.20448	-0.938733	0.385656	0.754155	1.73301	0.740352	8
PTGES2	-0.177387	-0.23352	0.787388	1.01989	0.571093	-0.23352	-0.00996066	-2.34304	0.619063	9
SF3A3	0.602345	1.12844	-0.44142	-0.702983	-1.02408	-0.0513609	0.502823	1.47137	-1.48514	19
GALNT2	-0.398692	-1.56516	0.324889	0.100139	0.63494	0.612367	0.346322	-1.50662	1.45181	15
CHAD	0.132135	-0.379953	-0.702414	-0.457412	-1.15876	0.146092	1.2874	1.8841	-0.751189	19
MVP	1.46634	1.99356	-0.413336	-0.542086	-0.483274	-0.678559	-0.555148	-0.171724	-0.615776	13
GLRK	-0.820228	-1.88258	0.607721	-0.355014	0.244081	0.439538	1.33091	0.982252	-0.546674	1
EIF3H	-0.0640907	0.00542053	0.0522977	-0.371548	0.327946	1.37227	-2.14895	-0.259263	1.08592	2
GALNT1	-0.402507	-1.02692	0.305774	0.256251	1.07381	-0.0281918	0.524416	-1.9243	1.22166	15
CRMP1	1.33992	1.6637	-0.404502	-0.401798	-0.896965	0.140196	-0.124982	0.180809	-1.49638	7
IARS2	0.0984919	-1.0371	0.916998	0.908491	0.84496	0.881765	-0.893079	-1.7203	-0.00023017	5
SYNGR1	-0.873183	-1.07889	0.645684	-0.545576	1.15265	-0.376173	0.627624	-1.07889	1.52675	8
PLCD1	1.18008	1.70144	-0.124046	-0.510834	-1.14522	-1.42341	-0.0399231	0.306332	0.0555849	18
DERL1	-0.857114	-1.89882	0.446927	0.364137	1.16104	-0.424247	1.11116	-0.480741	0.577658	3
LBR	-0.875611	-2.25414	0.294658	0.216321	0.594568	0.041647	0.657316	0.242458	1.08279	3
AMT	-0.412142	-1.23676	0.447018	0.386802	0.745523	1.38746	0.201568	-1.82633	0.306855	10
GPT2	0.653455	0.880405	0.715999	0.597529	1.09662	-0.44444	-1.02783	-0.779289	-1.69244	14
TIAL1	0.881396	1.19083	-0.846293	-1.0673	0.507555	0.37536	0.149998	0.591414	-1.78296	21
RPL37A	-0.109384	-0.0512996	-0.149285	-0.0781605	-0.76398	2.55884	-0.188287	-0.454468	-0.76398	22
LIN7C	0.0471679	0.337259	-0.0163971	-0.589336	-0.158761	-0.28786	-1.80782	0.497774	1.97797	8
GLYR1	-0.369965	-1.16668	-0.0481272	-0.29194	-0.0601206	-0.808411	1.0921	2.09112	-0.437979	1
MDK	-0.725077	-0.725077	-0.915136	-1.4994	0.46585	0.23415	0.674444	1.3783	1.11194	8
CKMT1A	0.445416	0.32695	0.290907	0.258146	-0.95265	2.07282	-0.942587	-1.15408	-0.344923	2
SOAT1	-0.806149	0.17213	-1.21411	-0.36541	-0.189995	0.17213	1.50119	1.61551	-0.885293	19
SCFD1	1.47477	1.7142	-0.384828	-0.395965	-0.527184	-0.19519	-0.910023	0.365981	-1.14176	13
TMX2	-0.321943	-2.03011	0.533745	0.462537	0.55602	-0.0460175	0.462918	-0.965575	1.34843	15
POF1B	-0.192126	-1.74032	0.699499	0.693137	-0.0396217	0.226639	0.856562	0.983249	-1.48701	1
CFL2	1.44151	1.87137	-0.0724598	-1.18469	-0.354535	-0.0924107	-0.439418	-0.596025	-0.573339	13
ABCD3	-0.444902	-2.45387	0.471823	0.646969	0.546262	-0.1378	0.275581	0.817731	0.278202	3
PPAP2B	-1.9433	-1.05759	0.432608	0.19371	0.729323	-0.311072	1.26691	-0.107539	0.796949	8
CTH	1.31956	1.54575	-0.127137	-0.24406	0.361319	0.361319	-0.909329	-1.00607	-1.30136	4
EPHX2	0.873602	0.868659	0.71526	0.59096	0.685286	-1.67204	-0.0767278	-0.556561	-1.42844	20
LTA4H	1.49804	1.96547	-0.349045	-0.445199	-0.799149	-0.576045	-0.327689	-0.601488	-0.364893	13
RAB3B	0.348302	-0.441967	0.996909	0.659695	-0.577467	-0.980734	-0.0561033	-1.54825	1.59962	5
HHATL	-0.281426	-1.62762	0.622999	0.467908	1.22428	0.732232	0.776523	-1.26823	-0.646676	10
MYO7A	-0.842105	-1.64714	-0.186245	-0.553359	0.229782	-0.370162	1.26787	1.39108	0.710285	1
EIF6	1.64965	1.40661	-0.500391	-0.327447	-0.752686	-0.112219	-1.50316	0.286783	-0.147141	4
RTCB	1.35191	1.37007	-1.24132	-0.544532	-0.553329	-0.0516816	-0.523339	1.05961	-0.867383	21
LOC771069	0.422159	-0.256728	1.04106	1.14764	0.358894	-0.133919	0.143499	-0.500687	-2.22193	5
IKBIP	-1.81469	1.13045	-0.241866	0.0962554	-0.371644	1.13045	-0.223446	-0.815013	1.10951	25
TIMM8A	0.687421	0.0858602	0.321006	0.165619	-0.195459	0.0228295	-1.96291	-0.810082	1.68571	2
TUSC3	1.04486	2.03748	-0.485334	-0.419381	-0.32087	0.261085	-0.610076	-1.33075	-0.177015	21
SRSF11	-0.670339	-0.0671154	0.597381	0.0891746	-0.596466	-0.0204086	0.308417	2.00525	-1.6459	1
PSMD13	1.42682	1.88264	-0.167669	-0.837204	-0.630291	0.103739	-0.637824	-0.234032	-0.906188	13
SEL1L	-0.823254	-2.15793	0.478974	0.435976	0.452532	0.44566	0.59238	-0.52644	1.1021	3
PICALM	1.07532	1.63645	-0.573008	-0.711592	-1.14514	-0.0318538	-0.0459815	0.896827	-1.10102	11
PPA1	1.42597	1.69458	-1.14318	-0.729967	0.275486	0.275486	-0.667764	-0.6613	-0.469317	21
SH3GL1	1.37641	1.74417	-0.800101	-0.871738	-1.06709	0.0249878	-0.288584	0.40667	-0.524718	11
DSG2	-0.475653	-2.15671	0.876616	0.84131	-0.213537	0.278561	0.545417	0.919861	-0.615869	5
GOLPH3	1.54822	1.53572	0.413211	-0.704553	-0.0830303	-0.785523	-0.118127	-0.509997	-1.29593	18
DNM1L	1.27486	1.70328	-0.553047	-0.502554	-1.00046	0.126321	-0.0691206	0.351201	-1.33048	7
CPSF6	1.21124	1.36788	-0.649792	-0.733531	-1.63599	-0.0402671	-0.405301	0.926031	-0.0402671	21
NUDT21	0.842641	1.27056	-0.62351	-0.928693	-0.185701	0.161051	0.350958	0.943277	-1.83058	21
DBT	-0.549815	-2.29689	0.642152	0.556317	0.994731	0.779415	-0.133332	0.210337	-0.20292	3
ALDH5A1	0.542122	0.266493	1.25046	1.26349	0.17768	-0.104674	-1.3671	-1.51732	-0.511164	5
AP1G1	1.02014	1.54895	-0.33152	-0.101763	-0.464227	-0.0435994	0.00268534	0.387344	-2.01801	18
EIF5	1.44136	1.70427	-0.515034	-0.815678	-1.05426	0.138368	-0.592696	0.375296	-0.681629	11
CORO2B	-0.836895	-0.496023	-0.416838	-1.11459	0.340878	-0.888578	1.39279	1.62329	0.395966	1
PDHX	-0.0227911	-1.4899	0.912259	0.815861	1.00783	0.773672	-1.27907	-0.980965	0.263107	5
C14ORF166	1.36467	1.513	-0.768735	-0.9201	-0.585531	0.689673	-0.671292	0.377856	-0.999538	11
PIGS	-1.7285	0.474145	-0.523128	-0.0345113	0.680108	0.474145	0.702018	-1.31276	1.26849	8
GNA13	-0.454034	-2.00348	1.00437	0.967507	0.998259	-0.217153	0.0388701	-0.772988	0.438647	6
CHST5	-0.739748	0.661053	0.349049	0.424595	0.705537	0.661053	0.157316	-2.39249	0.173633	17
ERLIN1	-1.31934	-1.99867	0.104086	0.473657	0.486947	1.00607	0.447947	0.0390595	0.760246	3
MCAM	-0.651789	-2.31279	0.16099	0.145696	-0.133642	0.877591	0.55517	0.39684	0.961933	3
ITGB6	-0.299257	-1.66822	0.65429	0.0948016	0.216697	1.96043	-0.751957	-0.429985	0.223207	10
RHOT1	-0.774855	-2.21164	0.892131	0.95842	0.496431	0.0762921	0.310477	-0.328162	0.580902	6
CDH2	-1.29321	0.957586	-0.601361	-0.691049	-0.529881	0.957586	-0.54071	-0.0142807	1.75532	23
PPP2R4	1.40233	1.59058	-0.557588	-0.753703	-0.807268	0.415336	-1.14776	-0.557257	0.415336	4
FADD	1.30241	1.68311	-0.586796	-0.825304	-1.28771	0.35295	-0.648133	-0.343487	0.35295	4
ATP6V1E1	1.3525	1.57825	-0.496016	-1.60603	-0.135573	-0.0479218	0.0810276	0.167708	-0.893945	21
OAT	1.03331	0.913425	1.02732	1.13119	-0.447635	-0.52728	-1.06776	-1.12431	-0.938259	14
PTPRK	-0.999056	-2.24326	0.210656	0.222772	0.26457	0.62494	0.380644	0.561574	0.977164	3
PPP1R7	0.940076	1.14534	-0.572794	-0.318301	-0.356598	1.64237	-0.546773	-0.529235	-1.40409	12
FN1	-1.04896	0.450362	0.126003	-0.201548	-0.644185	-0.559242	1.06766	1.89572	-1.08581	19
AGPAT4	-1.90498	-0.00212453	0.484002	0.169813	0.776504	-0.904681	0.590056	-0.610583	1.40199	15
CYP2J2L	-0.608012	-1.71232	0.507586	0.308217	0.875283	0.288568	0.632787	-1.38161	1.0895	15
MYO1C	-0.00847969	-1.30554	0.790168	0.354666	-0.321646	-0.87591	1.22708	1.32665	-1.18699	1
PES1	0.128619	1.43115	-0.35015	-0.243908	1.62599	0.0100316	-0.827315	-0.235098	-1.53932	2
DNPEP	1.35579	1.6397	-0.179555	0.0251993	-1.11449	0.555307	-1.06774	-0.527451	-0.686754	4
MCCC2	0.957738	0.597196	1.04578	1.26274	-0.312834	-0.539718	-1.26165	-1.38798	-0.361273	14
MRPL37	0.10689	-0.233751	1.31361	1.61022	-0.595424	-0.191838	-0.751916	-1.59529	0.337493	5
COL9A3	-0.551945	-1.26247	-0.168375	-0.560606	-0.762061	0.765167	0.708733	2.0142	-0.18265	1
OLA1	1.38984	1.61109	-0.419951	-0.302787	-0.414685	0.461437	-0.344704	-0.381714	-1.59852	4
COL9A1	-0.318458	-0.306697	0.0115329	-0.366603	-0.854675	0.77178	0.752235	1.84803	-1.53714	19
ACTL6A	0.520454	1.64974	-0.357594	-0.894861	0.516444	-0.234701	-0.96903	1.06619	-1.29664	21
PREP	1.35601	1.51812	-0.00183115	0.132461	-1.18547	0.625754	-0.863317	-0.639443	-0.942282	4
CNN3	1.23219	1.39098	-0.506304	-0.995816	0.0953342	0.0953342	-0.221185	0.603032	-1.69356	21
ABI1	-0.496735	2.0388	0.030879	0.462021	0.318659	-1.38871	-1.15404	0.0599443	0.129178	8
TOP2B	-0.573323	-1.94317	0.286252	-0.00903166	0.30936	-0.737588	1.09812	1.39144	0.177947	1
NUP155	-0.00313707	-0.435096	-0.0761042	-0.302953	-0.0561755	-1.63173	1.51583	1.55775	-0.568397	1
NONE	0.142284	-0.0494518	0.58005	0.329973	0.0196089	-0.0494518	-0.235772	-2.26622	1.52898	17
DCTN3	1.54018	1.66615	-0.186137	-0.468544	-0.290055	0.194397	-1.15015	-0.265491	-1.04036	4
AP3D1	0.169775	-0.710414	0.638365	0.182837	0.367577	-2.18693	0.7407	1.18665	-0.388559	20
DMD	1.11829	1.38814	0.834763	0.20124	0.367779	-0.794605	-1.2301	-0.824873	-1.06064	14
GGTLC1L	-0.391215	-1.01642	-0.239447	-0.456507	0.625901	0.953766	0.377987	-1.52283	1.66877	10
SAR1A	1.15027	1.28412	0.0722831	-0.580802	-0.0299276	-0.0926899	0.329112	0.00481568	-2.13718	18
PMM2	1.12023	1.59092	-0.27512	-0.0413947	0.401379	0.401379	-1.5854	-0.835355	-0.776632	4
QARS	1.48778	1.75539	-0.21395	-0.280616	-1.02159	0.185582	-0.79603	-0.207934	-0.908634	13
FADS2	-0.906465	-0.159861	-0.0337703	0.249093	0.858523	-0.159861	0.429735	-1.88567	1.60827	15
CYP20A1	-0.330663	-2.31305	0.667235	0.519335	0.822092	-0.0262027	0.743549	-0.585551	0.503259	3
THRAP3	-0.873486	0.265056	0.509809	0.388738	0.524329	-2.34169	0.421062	0.875737	0.230444	20
LAMTOR3	0.80903	1.25214	0.0800117	-0.14846	0.37782	-0.349402	-0.349402	-2.24386	0.572125	17
SYNJ2BP	-1.13187	-0.601432	-0.193453	-0.637655	0.148779	2.00046	-0.202575	-0.601432	1.21918	8
FKBP9	0.801173	1.53216	0.0197377	-0.0678688	-0.302011	1.11232	-0.961506	-0.579342	-1.55467	2
ATP6V1D	1.22636	1.72133	-0.850896	-0.942363	0.11961	-0.0370241	-0.321502	-1.28928	0.373762	21
SNRNP200	-0.780308	-0.948229	0.239073	0.194842	0.214151	-0.469747	0.988802	1.86106	-1.29964	1
UCHL5	1.51658	1.5364	-0.474335	-1.45149	-0.644588	0.40488	-0.321836	0.00414111	-0.569756	11
HPCAL1	-0.36519	-0.957038	0.39324	-0.374849	-0.70383	-0.251392	0.238858	-0.403994	2.4242	8
ATP6V1G1	1.0416	1.78543	-0.916631	-1.13974	-0.0108178	0.00694984	-1.18485	-0.0108178	0.428876	21
G3BP1	1.2519	1.51697	-0.331051	-0.304481	-1.02582	0.148211	-0.388149	0.645096	-1.51267	11
IGF2BP3	0.324618	0.0142821	-0.0815457	0.462395	-0.186091	0.0583429	-0.0571246	1.66771	-2.20259	19
PDXK	1.4977	1.53242	-0.301506	-0.312073	-1.09868	0.686733	-0.993086	-0.357811	-0.653706	4
UBE2K	1.27047	1.72147	-0.489457	-0.233071	-1.03974	0.414272	-1.20837	-0.618331	0.182762	4
PRPF40A	-1.02567	-2.1416	0.684601	0.495518	0.182081	0.235736	0.455213	1.16152	-0.0473976	3
PTGS1	-0.484186	-1.98512	0.112597	-0.256382	0.669027	0.839597	0.377839	-0.682438	1.40906	3
COPG2	1.3137	1.41919	-0.780577	-0.917926	-1.15416	0.11808	0.021763	0.844803	-0.864869	11
MAPT	-0.0904256	-0.738094	0.64245	0.0950604	0.0546944	0.0546944	0.777536	1.34818	-2.14409	1
GC	-0.292708	0.280185	0.384721	-2.29527	0.862732	0.275497	0.994927	-0.646967	0.436887	8
GULP1	-0.965127	-0.0218805	-0.271247	-0.131021	2.34909	-0.0052924	-0.382366	-1.04409	0.471936	8
PPT1	1.18389	1.44986	0.415648	0.420357	-0.729241	0.40534	-1.0685	-0.763544	-1.3138	4
AARS	1.38569	1.65119	-0.265877	-0.390632	-0.723579	0.620347	-0.626685	-0.342005	-1.30845	4
APRT	1.4056	1.44967	-0.79579	-0.708508	-0.959077	0.458015	0.458015	-0.109562	-1.19837	11
TMOD3	0.793759	0.492104	-0.567073	-1.00756	0.176441	-0.580109	-1.64238	1.17828	1.15654	8
GRSF1	0.762898	0.499267	1.04147	0.959147	0.238006	0.164497	-1.384	-1.67113	-0.610159	14
CD47	-0.716583	-1.77607	0.541067	0.469214	-0.112278	0.47922	0.296694	-0.846357	1.6651	10
HRSP12	1.61637	0.988591	0.407254	0.556688	-0.489971	0.154487	-0.913259	-1.42908	-0.891075	14
VAPB	-0.260698	-1.14131	-0.678612	-0.311716	0.846436	-0.16703	0.370494	-0.793208	2.13564	8
DNM2	1.31712	1.79621	-0.41114	-0.577202	-0.698916	-0.779438	-0.02619	0.479538	-1.09999	7
RAE1	-0.129046	-0.563671	-0.95715	-1.49712	-0.183555	0.544108	0.294037	1.94829	0.544108	8
DNM1	1.29673	1.58082	-0.36469	-0.427908	-1.11445	-0.624888	0.167648	0.668313	-1.18158	7
ACSL3	-1.15312	-1.68309	0.5194	0.56036	0.856825	-0.464538	0.819569	-0.589049	1.13364	15
ZMPSTE24	-0.775657	0.12356	0.514547	0.321806	0.59163	-0.972818	0.50029	-1.7982	1.49484	15
CHCHD6	-1.25988	-0.0641645	-0.856096	-0.12223	0.571758	-0.0641645	0.21642	-0.631608	2.20997	8
KTN1	1.33095	1.48928	-0.17535	-0.31861	-0.571487	-1.72801	-0.622534	0.317089	0.278674	18
C1GALT1	-0.483732	-2.33568	0.558078	0.50411	0.616265	-0.107251	0.21753	-0.107251	1.13794	3
TARSL2	-0.358388	1.3175	-0.661863	-0.634689	0.137145	1.17324	0.288286	-1.85966	0.598423	25
RARS	1.25335	1.71146	-0.199795	-0.23195	-0.760403	0.321103	-0.270083	-0.208608	-1.61508	11
HTRA2	0.727716	-1.89943	0.83264	0.426559	0.758232	-0.104506	-0.867125	-0.843041	0.968958	5
SNW1	-1.59303	-1.75813	0.663797	0.0107577	0.0954581	0.412571	0.531541	1.07215	0.564893	8
MST4	0.652861	0.761057	0.144613	-0.709982	0.22059	-2.14364	0.187298	1.27939	-0.392181	20
ARHGAP26	-0.0753116	-1.3718	1.59154	-0.387549	0.20537	-0.0433894	1.51157	-0.518603	-0.91183	8
DUSP15	0.562905	-0.0922148	1.3252	1.23661	0.109703	0.10154	-1.11738	-1.71804	-0.408331	5
MRPS27	-0.291911	-2.21494	1.05887	1.02129	0.615152	-0.0501835	0.0385549	-0.560923	0.384099	6
HNRNPUL1	-1.15074	0.519688	-0.688664	-0.424395	-0.508333	0.519688	1.00185	1.77117	-1.04026	19
GDPD1	-1.03133	-0.0431691	0.212976	0.032423	0.679996	-0.0431691	0.56768	-1.92424	1.54883	15
EEF1D	1.46638	1.6154	-0.203838	-0.562179	-0.868069	0.426242	-1.33322	-0.161447	-0.379267	4
GPD1L	1.08933	1.58378	0.310215	-0.351155	-0.226587	0.433307	-0.854857	-0.23459	-1.74944	4
GCDH	0.158814	-0.293011	0.915349	0.964725	1.67369	-0.417492	-0.873476	-0.823083	-1.30552	5
C11ORF54	1.26394	1.4959	-0.407146	-0.512393	0.521132	0.521132	-1.42002	-0.499624	-0.962914	4
APOOL	-0.922949	0.16636	1.12713	0.676362	0.328265	0.16636	-0.486835	-2.02133	0.966636	5
ITFG1	-0.394868	-1.90417	0.321526	0.185885	0.301865	1.35893	0.174986	-1.04943	1.00527	10
TIMM23	-0.239141	-1.15317	0.840978	0.784339	0.550349	0.297952	0.0677548	-2.02955	0.88049	9
OSBP	1.39234	1.77246	-0.821506	-0.834589	-0.933857	0.248306	-0.651621	0.210278	-0.381814	11
API5	0.90574	1.32018	-0.584941	-0.43566	-0.806922	0.369603	0.196193	0.862101	-1.8263	21
COL6A1	-0.494068	-1.67197	0.0755499	-0.353885	-0.792256	0.742891	1.10518	1.54998	-0.16143	1
BUD31	0.651732	0.343471	0.0814065	-0.395454	-0.0750954	0.153278	0.29056	1.2957	-2.3456	19
CTD-2410N18.5	1.53777	1.17188	-0.0866835	-0.330643	0.264277	0.088617	-1.75644	0.0975566	-0.986325	21
PSMA3	1.39419	1.64631	-0.558529	-0.949959	0.364051	0.364051	-1.02364	-0.453679	-0.782803	4
RPRD1B	0.678679	0.996495	-0.433883	-0.744305	-1.19361	0.328508	0.293853	1.48323	-1.40897	19
SLC16A7	-0.754443	-2.10271	0.729271	0.819441	0.477637	-0.140282	-0.122938	-0.140282	1.2343	6
NARS	1.21465	1.6427	-0.487159	-0.812518	-1.54648	0.356241	-0.465214	-0.258461	0.356241	21
SNX1	1.3004	1.77652	-0.30977	-0.971234	-0.433794	0.409377	-0.480803	-0.0563486	-1.23434	11
VPS29	1.48352	1.77015	-0.501095	-0.757041	-0.530521	0.130418	-0.727301	0.130418	-0.998546	13
ANPEP	0.434191	0.234986	0.00430051	-0.354286	0.278917	0.771851	0.0493843	-2.43412	1.01478	17
FLOT2	-0.666175	-1.14853	-0.283128	-0.284357	-0.0198274	2.32375	-0.28867	-0.32898	0.695923	10
PITPNA	1.27037	1.84709	-0.305177	-0.727101	-1.1704	0.361854	-0.514175	0.00398648	-0.766446	11
KIF5B	1.07391	1.91801	0.0386094	-0.153778	-1.22756	-1.14995	-0.47586	0.196622	-0.220004	18
PRPSAP1	1.30222	1.62561	-0.240231	-0.374098	0.0115126	0.37945	-0.762973	-0.317656	-1.62383	4
BUB3	1.07015	1.47172	-0.540042	-0.701867	-0.871352	0.415487	0.0687847	0.672996	-1.58588	11
DNAJC5	-0.205311	-0.988029	0.571327	0.541545	1.08937	0.125212	-0.235598	-1.98229	1.08377	5
RRAS2	0.98725	-0.715948	1.34844	0.0902013	0.561417	0.381603	0.23498	-1.45365	-1.4343	5
MCU	-1.03761	0.0615653	0.916003	0.824699	0.710952	0.0615653	0.197673	-2.16111	0.426258	5
LSAMP	-0.182821	-1.78301	0.377647	0.386526	0.0375212	1.12016	-0.244288	-1.10848	1.39674	10
LAMA2	-0.884684	-0.385415	0.30799	-0.143836	-1.13799	-0.631149	1.21175	1.92898	-0.265644	1
ACLY	1.3685	1.73972	-0.357945	-0.62899	-1.00228	0.436435	-0.268556	-0.152726	-1.13417	11
MESDC2	1.0923	0.730229	0.601802	0.353707	-0.923984	0.0601903	-2.20709	0.0601903	0.232656	2
SPTLC1	-0.944588	-1.50532	0.448883	0.15723	0.379734	0.294932	0.417828	-1.0257	1.777	15
RTCA	1.0985	1.3893	0.343971	0.0583436	-1.25547	0.375875	-0.576164	0.194773	-1.62912	4
HSDL1	-0.236331	0.000698037	1.04414	0.944174	0.194544	0.000698037	0.706509	-2.30252	-0.351906	5
EIF1AY	1.19652	1.83756	-0.277908	-0.631424	-1.41413	0.123882	-0.815383	-0.143	0.123882	4
SNAP25	-0.273448	-2.24035	0.469527	0.391591	0.672235	0.148978	0.32558	-0.702103	1.20799	3
PITPNB	1.47776	1.76354	-0.267717	-0.507719	-0.697514	0.40866	-0.419624	-0.916843	-0.840538	13
SGPL1	-1.0184	-2.13773	0.460497	0.426173	0.640419	0.371473	0.554572	-0.318036	1.02102	3
LRWD1	-0.892512	-1.51478	0.296526	-0.0838822	-0.35025	0.523354	0.8365	1.82041	-0.635364	1
COL6A3	-0.439185	-1.81212	0.388102	0.0265419	-0.673076	-0.243168	1.21023	1.54763	-0.00495044	1
MRPL40	0.215524	-1.7908	1.10711	1.12995	0.0307048	0.260999	-0.488569	-1.18856	0.723647	5
RAB35	-0.389698	0.0930203	-0.803047	-1.16024	-0.817883	-0.106225	1.62481	-0.0304908	1.58975	8
OTOGL	-0.42215	-0.766617	-0.126414	-0.623334	-0.842373	2.42136	0.0538839	-0.169174	0.474813	22
SSRP1	-2.27858	0.223027	0.269002	0.11307	0.20294	0.223027	0.795763	1.18686	-0.735105	8
CHMP4B	1.31617	1.6766	-0.0444428	-0.217786	-0.860345	0.374761	-0.827154	-1.35597	-0.0618355	4
SLC25A25	-0.0978039	0.183716	0.908995	0.899617	0.339893	-0.0880863	-0.375062	-2.38371	0.612438	5
STIM1	-1.31201	-1.50649	0.816199	0.598035	0.400701	0.586197	0.0592619	-0.919471	1.27757	10
DNAJA2	1.44201	1.32831	-1.01066	-1.18845	-0.893098	0.226145	-0.729074	0.442889	0.38193	21
LAMTOR2	0.0490341	-0.224369	-0.20429	0.0328444	0.408312	0.109461	-1.73903	-0.533589	2.10162	8
ALDOB	1.2313	1.4761	-0.284076	-0.285952	-1.55223	0.472404	-1.00627	-0.523686	0.472404	4
MOB4	1.55543	1.67709	-0.284029	-0.918329	-1.06447	0.0406412	-0.600582	0.161974	-0.567729	13
FARSB	1.15562	1.39861	-0.0824663	-0.124253	-0.949259	0.492973	-0.0486758	0.0384834	-1.88102	11
STX6	-0.0770107	-1.50854	0.489783	-0.882956	0.534823	0.0671372	-0.676776	0.0671372	1.9864	8
ALDH4A1	0.404043	0.503193	0.5077	0.761289	0.721774	0.922403	-1.16912	-1.82211	-0.829177	2
STRAP	1.46901	1.67942	-0.412438	-0.258152	-0.998399	0.502857	-1.04824	-0.475007	-0.459046	4
CRTAP	0.340442	-0.10546	0.425854	0.380274	1.26047	-1.86429	0.0917653	0.81581	-1.34487	20
TBL2	-1.33915	-1.85532	0.357557	0.364469	0.487686	0.32406	0.77546	-0.321504	1.20674	3
RBFOX2	-0.34979	-0.513537	-0.805437	-1.90971	0.812465	1.09848	0.0809648	0.488093	1.09848	8
NIPSNAP3A	1.03037	0.994132	0.776166	0.965642	-0.688494	0.293224	-1.15442	-1.28962	-0.927003	14
CNPY3	0.714545	0.373428	0.5883	0.672675	-1.81927	0.626286	-0.849117	-1.17355	0.866706	14
LAMB2	-0.760714	-1.33904	-0.112555	-0.184304	-1.09617	0.796245	1.01675	1.64656	0.0332268	1
C1GALT1C1	-0.930598	-1.86127	0.35653	0.155998	0.910311	0.150899	-0.48485	0.150899	1.55208	3
UBE2H	-1.19033	0.300143	-0.288491	-1.30782	0.197205	0.300143	-0.367571	2.08892	0.2678	8
ANK3	1.46865	1.83392	-0.0264468	0.134051	-0.96672	-0.522176	-0.763971	-0.595992	-0.561312	13
ALDH18A1	-0.149342	-0.182806	0.927218	1.01046	1.72592	-0.684907	-1.03429	-0.455265	-1.15699	5
PPP2R2A	1.39535	1.78533	-0.566453	-0.72145	-1.0593	0.382462	-0.0493551	-0.392341	-0.774249	11
TTC38	1.39126	1.6351	0.0101619	-0.0892747	-0.823284	0.41855	-0.883453	-0.397619	-1.26143	4
COL18A1	-1.02272	-0.959779	-0.0576343	-0.182346	-0.940134	0.679612	1.0933	1.81056	-0.42086	1
NFIA	0.416391	0.839723	-0.530467	-1.09833	-0.874798	0.461812	0.543507	1.59256	-1.35039	19
C4BPA	-1.63307	0.29931	0.659352	0.700619	-0.00477461	0.29931	-0.463151	-1.34365	1.48606	17
PCYOX1L	-0.295083	-1.55962	0.524888	0.860885	-0.0430068	1.63022	0.586405	-0.913868	-0.790824	10
ACBD3	1.64821	1.47389	-0.775461	-1.28611	-0.00619037	0.244816	-0.704453	-0.049803	-0.544904	21
DYNC1I2	0.816881	1.26078	-1.45758	-0.343272	0.812668	-0.00728733	-0.00728733	-1.60106	0.52616	21
GARS	1.22832	1.55808	-0.0276769	0.0471035	-0.295657	0.467473	-0.819605	-0.464871	-1.69317	4
PKP2	-0.288778	-1.21707	0.237603	0.280551	0.0639846	0.539248	0.783895	1.42986	-1.8293	1
ENPP6	0.889607	-1.02457	-0.31404	-1.02946	0.209482	1.92057	-0.0449309	-1.03883	0.432169	22
SEPT8_	1.46005	1.72242	-0.476631	-0.591733	-0.735379	0.528261	-0.612253	-0.265711	-1.02903	13
SERPINF1	-0.3222	0.564817	-0.513308	-0.928443	-1.01367	0.668719	0.99848	1.65685	-1.11124	19
VTI1B	-0.59487	-2.33247	0.669641	-0.230442	0.448789	0.375667	0.299144	0.269261	1.09528	3
NCBP2	0.412704	-0.42567	-0.635374	-1.1741	-0.770753	0.412704	0.432108	2.17549	-0.427111	19
LNPEP	-0.469605	-1.48003	0.012525	-0.0817769	0.719883	1.74999	-0.291126	-1.05562	0.895751	10
DYNC1LI2	1.32483	1.8934	-0.346359	-0.588779	-0.860145	0.402943	-0.953922	-0.457229	-0.414737	13
EIF3I	1.27731	-0.189789	0.157951	0.316842	0.238932	0.320262	-2.10781	-0.902545	0.888847	2
GSK3B	0.88336	1.38324	-0.833222	-0.79371	-1.17639	0.393717	0.0934776	1.12776	-1.07823	21
ABCD4	-0.599364	-1.27872	0.284999	1.54279	1.07265	0.375109	-0.0113722	-1.49684	0.110754	5
POMGNT2	-0.933991	0.728013	0.422756	-0.172002	0.838558	0.728013	0.142717	-2.21819	0.464129	17
PPIL1	0.937193	1.41252	-1.07684	-0.114788	-0.800101	0.443185	-1.48402	0.925242	-0.242399	21
KDELC1	0.886937	1.40685	0.5162	0.463754	-2.03898	-0.518668	-0.341459	0.0766819	-0.451314	18
ASAH1	0.998956	1.15133	0.29719	-0.14512	-0.12719	0.840205	-0.865141	-2.01979	-0.130435	17
AUH	0.764979	0.0105046	1.07925	1.01924	-0.319669	0.200137	0.200137	-2.05349	-0.901086	5
PDP1	0.580933	0.073535	0.800295	0.859363	0.00811061	1.3282	-1.02556	-1.21978	-1.4051	2
PIGU	-0.554611	-1.74191	0.437542	0.339983	1.00035	0.956196	0.850161	-1.30878	0.0210583	10
COPS4	1.25224	1.70614	-0.16805	-0.430239	-0.185282	0.380121	-0.525885	-0.384551	-1.6445	4
TOM1L2	0.561121	0.650969	-1.28332	-1.10304	-0.635484	0.623989	-1.05051	1.10246	1.13382	21
KIRREL	1.33422	1.82691	-0.566472	-0.41377	-0.541063	0.493808	-1.1292	-0.309825	-0.694609	4
CA9	0.38971	-1.1986	1.32499	1.1712	0.162095	0.711454	-0.980403	-1.31063	-0.269824	5
MYO1D	-0.750123	-0.637592	0.405779	0.0567831	0.134323	-1.91379	1.17026	1.33093	0.203438	1
PPCS	1.26473	1.45436	-0.957512	-0.280449	-0.355509	0.549239	-0.90372	0.549239	-1.32038	11
CHID1	0.795299	0.580197	0.923553	0.920481	-0.746106	0.261122	-1.77222	0.261122	-1.22344	2
COL8A2	-0.422855	-1.42891	-0.0316871	-0.879171	0.114412	0.615586	1.47303	1.34915	-0.789553	1
NCBP1	-1.08306	-1.61593	0.512154	0.0640541	0.219451	0.710374	0.443976	1.58258	-0.833593	1
NT5DC2	0.744972	0.649218	0.687846	0.576101	1.01682	-0.0121058	-0.771497	-0.993319	-1.89804	14
SEC31A	1.34046	1.61463	-0.732529	-0.891991	-1.08947	0.310732	-0.105536	0.436267	-0.882564	11
ITGB5	-1.05704	-1.39464	-0.122049	-0.0443906	0.310243	1.49398	0.198975	-0.779716	1.39463	10
ATP12A	-0.746809	-0.401372	-0.0329425	0.330506	1.98004	0.0773812	-0.366515	-1.59422	0.753932	8
EMILIN3	-0.536946	-2.07621	0.0218534	-0.0464444	-0.32666	0.750897	0.925443	1.36579	-0.0777256	1
PPIG	-2.34929	0.319184	0.76518	0.796469	-0.216146	0.319184	-0.170047	0.915113	-0.379643	8
NME3	0.685599	-0.335042	0.815056	0.616076	-0.667729	1.61911	-0.842733	-1.5814	-0.308932	2
COPS3	1.11188	1.82015	-0.47931	-0.632866	-0.599705	0.483709	-0.323752	0.0747301	-1.45483	11
ALCAM	-0.59887	-0.743845	-0.417957	-0.628578	-0.778485	1.55271	-0.432883	0.243905	1.804	23
AGPAT5	-0.387267	-0.285955	0.409697	0.914995	-0.6063	0.262667	0.292112	-2.04085	1.4409	17
GOLIM4	-0.436769	-0.388464	0.263997	0.840524	0.634699	0.383227	0.139203	-2.34324	0.906818	17
CAPN5	-0.169358	-2.05145	0.516474	0.404943	0.538379	0.453235	0.2398	-1.14438	1.21235	3
STAU2	0.115167	-0.134772	0.688217	0.942424	-0.317533	-2.11424	0.588902	1.02758	-0.79575	20
DDAH1	1.43108	1.53335	-0.534759	-0.312017	-1.17733	0.398567	0.398567	-0.82235	-0.915118	11
NONE	-0.27292	-0.07801	-0.760025	-1.45115	-0.608027	0.778727	-0.278336	0.778727	1.89102	23
PAIP1	1.04751	1.32758	-0.393668	-0.695041	-0.754761	0.483314	-0.0587651	0.794385	-1.75055	11
TJP1	-0.769116	-0.995313	-0.143288	-0.274642	-0.0863018	-1.37373	1.20982	1.16667	1.2659	1
LYPLA1	0.455265	1.15823	0.236735	-0.244852	0.945204	0.497839	-1.59758	0.165996	-1.61684	2
STAU1	-1.16902	-1.25334	0.23963	-0.337775	-0.282181	0.668723	1.16774	1.60867	-0.642451	1
PYGL	1.34854	1.6734	-0.190919	-0.224746	-0.723953	0.644775	-0.663391	-0.633864	-1.22984	4
PPIP5K1	-0.378852	-0.14938	-0.138924	-0.94081	0.318524	2.41531	-0.105962	-0.0287086	-0.991201	22
ME3	0.365152	0.596555	0.683288	0.628746	-0.631787	1.5943	-0.87136	-0.906741	-1.45815	2
ARFIP1	1.5006	1.86543	0.0311849	-0.761495	-0.369905	-0.938302	-0.239235	-0.441967	-0.64631	13
SLC34A2	-1.41331	0.425611	-0.81004	-1.24132	0.69974	0.425611	0.880641	-0.390233	1.4233	8
SNX3	1.26502	1.47748	-1.1626	-1.05607	-0.27297	0.421265	-0.109581	0.533478	-1.09602	11
PM20D1	-1.59873	0.423558	-0.0466808	-0.00420205	0.777038	0.423558	0.397607	-1.64415	1.272	17
PGM2L1	1.37667	1.65695	-0.735064	-0.834129	-0.791761	0.647521	-0.103547	-0.204442	-1.01219	11
NONE	-0.85791	-1.21098	0.150046	-0.476659	-0.790841	1.4339	0.698505	-0.427759	1.4817	10
AP3M2	-0.530239	-2.18249	0.0588884	-0.501841	0.75833	0.548853	0.185681	1.28251	0.380308	3
NID2	-1.81678	0.749869	-0.245227	-0.444023	-0.775312	0.749869	0.74207	1.42124	-0.381711	19
EPHX1L	-0.377352	0.321402	0.984539	1.03613	0.369561	0.321402	0.119654	-2.28376	-0.491578	5
SGCD	-1.30677	-1.82127	-0.114207	-0.11244	-0.0425735	1.04581	0.705538	0.853099	0.792808	16
ATP13A1	-0.258819	-2.2292	0.499005	0.449491	0.298067	-0.67332	0.589958	0.0521584	1.27266	3
PNN	-2.37365	0.481364	0.50241	0.328995	-0.151169	0.481364	-0.0511993	1.16895	-0.387068	8
AFG3L2	-0.249337	0.361599	1.13907	1.04725	0.107935	-0.438539	-0.311794	-2.19561	0.539433	5
EIF4E	1.32061	1.35163	-0.255098	-0.62784	-0.298463	0.589515	-0.763648	0.362224	-1.67894	11
ATL1	-2.21781	1.07583	0.432332	0.252429	0.328504	0.656831	0.419781	-0.978169	0.030273	17
TUBG2	-0.0407588	0.746933	-0.85423	0.345555	-0.5818	0.345555	0.871296	1.16924	-2.00179	19
CLCC1	-1.5186	-1.6563	0.8732	0.724709	0.485075	0.576599	-0.122103	-0.343507	0.980918	5
AGR2	1.13113	0.593241	0.51269	0.170289	0.348766	0.496731	-1.70854	-1.66569	0.12139	14
TPP2	1.21378	1.56158	-0.624156	-0.436959	0.560879	0.560879	-1.05557	-0.590767	-1.18966	4
STX16	-0.723923	-0.430983	0.469162	-0.999946	0.823856	0.960945	0.536259	1.09274	-1.72811	1
RAB8B	0.251028	0.60677	0.36356	-0.366825	-0.0514479	1.98727	-0.241166	-1.12817	-1.42101	2
LMNA	-1.32491	-2.05907	0.242864	0.17576	0.355257	0.548495	0.602535	0.555774	0.903303	3
ITM2A	-0.421868	-1.87777	0.548181	0.533167	0.897943	0.846274	0.623693	-1.32944	0.179825	3
ABCE1	1.19346	1.68212	-0.533986	-0.944381	-1.1045	0.499317	-0.554141	-0.737214	0.499317	21
DAP3	-0.356092	-2.41333	0.97908	0.646392	0.4995	0.472259	0.275558	-0.295431	0.192062	6
UVRAG	1.20524	-1.1995	-0.217488	0.900857	0.241892	0.65713	-1.92429	0.16808	0.16808	2
CYB5R2	-0.929842	0.218569	0.57632	0.485847	0.713625	0.218569	0.230517	-2.30014	0.786532	17
GAS2	0.962907	1.58972	-1.01426	-0.298425	-0.865717	0.269021	0.117991	0.692301	-1.45354	11
ADRM1	1.15425	1.64257	-0.76941	0.392924	-1.35639	0.392924	-0.52042	0.0415764	-0.978021	4
CSTF1	-0.239892	-0.233313	0.0899283	-1.9081	-0.622009	0.833052	0.877985	1.51346	-0.311111	19
PSMF1	1.24867	1.5059	-0.356249	-0.324088	-0.407736	0.608024	-1.58391	0.228256	-0.918867	4
GART	1.35971	1.74081	-0.609265	-0.437119	-0.958833	0.72126	-0.535046	-0.716552	-0.564967	4
HSPA12A	1.02384	1.23762	-0.965224	-1.02593	-0.903458	0.641928	0.268341	0.885432	-1.16256	21
CNTN1	-1.82142	1.05375	0.365652	0.280897	-0.361877	1.05375	-0.235394	-1.16929	0.833929	17
SLC30A7	-1.21045	0.46571	-0.835854	-1.24903	0.318038	0.46571	1.13335	-0.553772	1.46629	8
ITGB4	-2.23576	1.34034	-0.183686	-0.254946	-0.0452566	-0.186774	0.515791	0.170478	0.879822	8
SRP68	0.820841	1.27224	-0.705606	-1.2801	-1.11468	0.251803	0.202328	1.29424	-0.741075	21
CPNE3	-0.465943	-2.19612	0.296929	0.0913317	0.561475	0.627414	0.277209	-0.531957	1.33967	3
SLC4A4	-0.845095	-2.26924	0.603099	0.750191	0.248364	0.666037	0.16782	-0.132802	0.81163	3
UMPS	1.32685	1.49863	-0.493817	-1.01844	-0.729105	0.691568	-0.262137	0.241653	-1.2552	11
EPB41L3	0.157991	-0.0813152	0.340207	0.41807	-0.428153	-2.39193	1.06483	0.788721	0.13158	20
C20H20ORF108	-1.50714	0.253133	1.11431	1.04551	0.518964	0.253133	0.138442	-1.7229	-0.093453	5
NONE	1.58269	1.57198	-0.325618	-0.732319	-0.263516	0.561824	-1.03526	-0.692255	-0.667521	4
B4GALT4	-0.608048	-2.21106	0.511743	-0.164507	0.367072	0.504974	-0.229886	0.504974	1.32474	3
MRPS35	-0.462749	-2.27628	0.596506	0.703345	0.765809	0.529669	0.169963	-0.667992	0.641724	6
SMU1	0.432425	0.144025	-1.37622	-0.955696	-0.636011	1.08631	0.809848	1.39261	-0.897287	19
MRPS7	-1.82012	0.431079	0.860818	1.16219	0.274919	0.431079	-0.232723	-1.41417	0.306933	17
FSCN2	0.768604	1.23698	-0.894292	-1.75778	-0.618436	-0.0762156	0.539456	1.10403	-0.302344	21
SH3GLB2	1.40547	1.75301	-0.561552	-0.774243	-0.548908	0.610109	-0.66725	-0.310002	-0.906628	13
MSI1	-0.72799	1.66367	-0.584778	-1.49509	-0.359548	0.940557	0.940557	-0.467265	0.0898921	8
PGM3	1.09505	1.40728	-0.836719	-0.742436	-1.06745	0.61392	0.103789	0.682189	-1.25563	11
DCAF7	0.0556902	1.64769	-0.637969	-0.240504	0.457576	0.457576	-1.96526	0.617977	-0.392776	2
GPD2	-1.24926	0.336558	0.526492	0.445311	0.150706	0.77671	-0.230556	-1.94094	1.18498	17
SLC27A1	0.441386	-0.216332	0.469977	0.635382	0.242042	0.66687	-0.404927	-2.46381	0.629414	17
PRPF38A	-1.6943	0.723534	0.340914	-0.13615	-0.250517	0.723534	-0.181258	1.60451	-1.13028	19
FGG	-0.515626	-0.992871	-0.542594	-1.31433	0.676875	0.676875	0.911019	1.63993	-0.539284	1
MRPL10	-0.689422	0.485944	1.20217	1.2427	0.400233	0.485944	-0.598259	-0.848663	-1.68065	5
CES1	1.24112	1.4027	0.242727	-0.130854	-1.11139	0.680911	-0.715438	-0.130476	-1.4793	4
HIBCH	0.798629	0.686791	0.724832	0.770672	-1.43096	0.493515	0.493515	-1.17294	-1.36405	2
TAF15	-0.394879	-0.666585	-0.190743	-0.396921	-0.599409	0.917413	0.972236	1.75983	-1.40094	1
EDF1	0.346118	0.887523	-0.940036	-0.945	-0.432312	2.16284	-0.561683	-0.22987	-0.287581	22
TOP1	-1.14408	-2.089	0.107969	0.0523949	0.156863	0.6758	0.739603	1.03196	0.468489	3
SEPT9_	1.19788	1.55396	-0.379877	-0.23433	-0.855297	0.622881	-0.230457	-0.00790666	-1.66685	11
COL6A2	-0.518756	0.872759	-0.515125	-0.73651	-1.60487	0.872759	0.723111	1.42548	-0.518845	19
GLRX3	1.40194	1.63373	-0.265163	-0.324904	-0.544794	0.60006	-0.589049	-0.532692	-1.37913	4
LRRC1	-0.120566	0.610078	1.06336	1.08569	-0.378977	0.610078	-1.67313	-1.396	0.199476	5
RBM25	-0.501464	-2.34324	0.405395	0.442511	0.0615101	0.717919	-0.000229946	1.17323	0.0443703	3
TOR1AIP1	-2.25464	0.475524	0.157663	-0.277117	-0.112957	1.49487	0.446834	-0.229057	0.298881	8
LECT1	-0.533625	-0.133329	-1.0067	-1.39181	1.60145	1.16036	0.0229056	0.771186	-0.490447	24
MRPS22	-0.409732	-2.40536	0.624902	0.89314	0.546022	0.601573	0.25424	-0.305401	0.200612	6
NONE	-1.92595	0.547682	1.30466	0.860684	0.0602985	0.547682	-0.197398	-0.104821	-1.09283	5
SMARCE1	-0.847689	-0.484535	-0.804261	-0.857805	-0.328647	1.302	-0.242833	1.91912	0.344651	16
GRB2	1.52981	1.34332	0.022134	-0.888784	-0.456503	0.65002	-0.895415	-0.0273397	-1.27724	4
FASN	1.21158	1.67455	-0.423933	0.0243947	-1.37786	0.681962	-0.848589	-0.370678	-0.571434	4
TPBG	-1.39739	1.24403	-0.236803	-0.533564	0.051822	1.24403	-0.193346	-1.21972	1.04094	25
MRPS9	-1.18362	-1.61957	1.10034	1.14099	0.724851	0.761979	-0.277263	-0.511945	-0.135768	5
BCAS1	1.24443	1.40978	0.00868071	-0.0495655	-1.65257	0.670036	-0.871775	-0.0378726	-0.721141	4
SAFB2	0.151386	-1.22706	0.184036	0.22519	-0.752752	1.46461	-0.8913	1.54609	-0.700204	2
AGRN	-0.947322	-2.11922	0.291102	0.0967591	-0.22537	0.807135	0.631937	1.14643	0.318546	3
MYO18A	-0.543598	-1.46063	1.10089	1.40221	-0.559914	-1.18816	0.146433	0.689585	0.413188	5
TNPO1	0.777889	0.984193	-0.225953	-0.919986	-1.01349	0.699205	0.358107	1.02404	-1.68401	19
GJA1	-1.8239	0.712475	-0.82466	-0.273174	-0.119004	0.712475	0.906224	1.30776	-0.598196	19
ARGLU1	-0.975893	-1.63467	0.292416	-0.198946	0.256736	1.02556	0.497451	1.51179	-0.774442	16
MPP6	1.25525	1.41768	-0.02159	-0.402174	-1.00981	0.994893	-0.703124	-0.228795	-1.30233	4
OTOA	-1.14185	-0.111721	-0.292952	-0.611192	0.353667	1.79318	-0.0220753	-1.18409	1.21704	8
FERMT2	1.16051	1.73004	-0.667093	-1.19223	-1.04365	0.644372	-0.221424	0.0740322	-0.48456	11
BZW1	0.869538	0.812789	-0.653415	-2.23263	0.0994595	0.700906	-0.00441166	0.745803	-0.338035	21
MAPRE2	1.4237	1.40128	-1.07375	-0.56669	-0.471936	0.55532	-1.04164	-0.781599	0.55532	21
C17ORF75	0.347782	-0.432817	-1.27173	-1.54943	-0.359159	0.384658	0.989507	1.50653	0.384658	8
DEK	-0.837459	-1.27495	0.509669	-0.491927	-0.13746	1.00404	0.384711	1.77091	-0.927528	16
PRPSAP2	1.33558	1.64036	-0.271926	-0.633634	-0.836134	0.72239	-0.279721	-0.423262	-1.25365	11
FBN1	-1.05831	0.751998	-0.223093	-0.587913	-1.6542	0.751998	0.627412	1.48806	-0.0959584	19
PDCD10	0.594077	1.4593	-0.970211	-1.93524	0.562302	0.309551	0.202082	0.309551	-0.531412	21
UPF1	1.16298	1.45985	0.267268	0.131914	-0.748397	-0.571905	-0.273336	0.391579	-1.81996	18
PAK2	1.34187	1.51275	-0.440282	-0.745228	-0.896615	0.663817	-0.30642	0.204774	-1.33467	11
RNMT	0.693013	1.10467	-1.10045	-0.891453	-1.10495	0.669908	0.653289	1.03608	-1.06011	19
IQGAP2	1.32994	1.80302	-0.487002	-0.528342	-0.776234	0.668902	-0.605217	-0.528342	-0.876727	13
CLCNKA	-0.533609	-0.672504	0.511696	0.720181	1.76402	0.652116	-1.61173	-0.455195	-0.374981	5
DPY30	1.23002	1.57241	-1.09859	-1.15273	-0.336384	0.405441	-1.01828	-0.00732247	0.405441	21
MYEF2	0.0168626	0.612657	-0.493241	-0.250619	-0.701089	1.00588	0.337928	1.40332	-1.9317	19
RBMS1	0.517082	0.59223	-1.39501	-1.35255	-0.272735	1.4228	0.215097	0.980382	-0.707297	19
CTHRC1	-0.324706	-0.0695745	-0.50983	-0.582873	-1.81923	0.677951	0.213786	1.73652	0.677951	8
PITRM1	0.86863	0.775785	0.850795	0.91667	-0.662714	0.667017	-1.29906	-1.42376	-0.69336	14
MRPL46	-0.740382	0.246836	0.986725	0.839306	0.146937	0.773843	-0.123117	-2.25008	0.119936	5
SF3A2	0.305715	1.18744	-0.808933	-0.959907	-1.14948	0.62339	-1.09535	1.27374	0.62339	21
TMEM245	-1.71342	1.24402	-0.0371527	-0.207913	0.254547	1.24402	-0.162216	-1.21647	0.594589	25
EPS8L2	1.19775	1.5752	-0.369303	-1.2423	-1.2332	0.677752	-0.414547	0.246495	-0.437855	11
FOLH1	-0.55816	-0.0955523	-0.435863	-0.684642	0.408475	1.63484	0.167614	-1.64272	1.20601	8
FUBP1	1.09619	1.22992	-1.28414	-1.25849	-0.935112	0.603634	-0.501178	0.445536	0.603634	21
ANKFY1	1.40953	1.92274	-0.34628	-0.315113	-1.06346	-0.0432517	-0.393898	-0.335767	-0.834494	13
AP3B2	-0.460691	-2.06505	0.525956	0.218242	0.317486	-0.815803	0.360296	1.43967	0.479895	3
VAMP7	0.0601807	-0.888565	0.669304	0.497757	0.953687	0.360988	-0.0289824	-2.25287	0.628499	5
LRRC75A	-0.764811	-0.187422	1.29224	1.48275	-0.884687	0.936695	-0.507933	-0.109251	-1.25758	5
MVK	1.41512	1.61365	-0.191084	-0.494756	-0.779958	0.752764	-0.606558	-0.621389	-1.08778	4
SEH1L	0.46458	0.50214	-0.591768	-1.44472	-0.275516	0.675541	1.12437	1.03656	-1.4912	19
SMARCC1	-0.180351	-0.407901	-0.652441	-1.16896	-0.521029	1.88448	0.17601	1.3776	-0.507409	22
UXS1	-0.902963	0.632043	0.164433	-0.154512	0.229512	0.632043	0.460874	-2.18999	1.12856	17
FAM129A	1.17057	1.57219	-0.331625	-0.103571	-1.05162	0.786939	-1.34286	0.0131666	-0.713202	4
TBRG4	0.543033	0.250185	0.67043	0.304093	0.943335	0.878996	-1.83236	-0.361294	-1.39642	2
FAHD2A	1.03002	1.14233	0.62413	0.640242	-1.06291	0.669298	-0.693833	-1.26405	-1.08523	14
BCLAF1	-2.42727	0.70351	0.217618	0.329729	0.388115	0.70351	-0.451219	0.749958	-0.213954	8
SUN1	-2.02039	1.083	-0.346464	-0.449527	-0.758066	1.083	0.564962	0.405234	0.438241	25
ATP6V1H	1.1014	1.78074	-0.816225	-1.15151	-0.86551	0.690659	-0.601379	0.0457521	-0.183929	11
DNAJC5B	-1.47884	-1.11374	-0.37592	-0.933322	1.35668	0.484137	0.850073	0.484137	0.726793	8
SEC63	-0.811056	-2.1961	0.443086	0.490642	0.550365	0.70622	0.452789	-0.528379	0.892431	3
COMTD1	-2.04445	0.641984	0.436523	0.637008	0.119621	0.641984	-0.194768	-1.19577	0.957866	17
MYL1	-0.712814	-1.25634	-1.03201	-0.41981	1.26943	0.765781	-0.217553	0.0461122	1.5572	8
CTSB	1.03774	1.1195	-1.17715	0.334375	0.862874	0.160021	-1.74249	-0.604825	0.00994961	21
GPS1	0.975438	1.70622	-0.789464	-1.2699	-0.988828	0.547754	-0.534646	-0.194329	0.547754	21
PSMA6	1.01248	1.47114	-0.681065	-1.17766	-1.10209	0.599116	0.439181	-1.00029	0.439181	21
WDR18	-0.650533	-1.61167	-0.632789	-0.396457	0.180922	1.37314	-0.0479196	1.56627	0.219031	16
CRYM	1.02032	1.09263	-1.49575	-1.26929	0.211777	0.700337	0.367835	0.410295	-1.03816	21
DCPS	1.2697	1.58203	-0.64422	-1.02	-0.678313	0.791327	-0.494779	0.219177	-1.02493	11
LAMTOR1	-1.56719	0.702567	-0.278321	-1.06337	0.964719	0.702567	-0.118161	-0.717328	1.37452	8
ME1	1.11123	1.37878	-0.490443	-0.196306	-1.50032	0.681879	-0.920575	-0.746137	0.681879	21
GPR89A	-0.903777	-1.96837	0.359941	0.488844	0.635837	0.670396	0.507328	-0.84565	1.05545	3
MTDH	-0.468248	-1.83819	0.118214	-0.267608	0.194782	0.881028	0.126602	-0.535301	1.78872	10
NCAM1	-0.852317	-1.65016	0.317674	-0.360199	-0.582933	1.34314	0.523158	-0.112985	1.37461	10
IKBIP	-1.74683	1.32269	-0.301882	-0.176906	-0.0104373	1.32269	-0.277471	-0.853761	0.721913	25
LUC7L3	-0.861898	-1.90912	0.518515	0.378683	-0.558233	1.16297	0.259293	1.19733	-0.187535	16
HSPH1	0.768157	0.460548	0.216673	-0.414061	0.880031	1.4222	-1.65731	-0.962145	-0.71409	2
MYL9	-0.466385	-0.614538	-0.275361	-0.189667	-0.0167984	2.11042	-1.44545	0.0326093	0.86517	22
IVD	0.838291	0.637736	0.665003	0.728315	0.468011	0.624236	-1.2116	-1.20181	-1.54818	14
FAM114A1	1.45504	1.70375	-0.421121	-0.985237	-0.331672	-0.0196288	-0.327348	0.183537	-1.25731	11
AHNAK2	1.39939	1.75438	-0.457681	-0.447846	-1.17498	0.343013	-0.979615	-0.235494	-0.201172	4
HSD17B7	-1.62285	0.911124	-0.767664	-0.379287	0.432813	0.911124	-0.421708	-0.573232	1.50968	8
LRRC57	0.770977	0.935367	0.234444	0.183486	0.120079	1.00243	-0.49478	-0.541973	-2.21003	2
ARSE	-1.78073	-0.791325	-0.391339	0.162758	1.14617	0.64191	0.757453	-0.791992	1.0471	8
CCDC108	0.388	1.13261	0.0782459	0.124192	-0.879669	1.0113	-2.16784	0.156584	0.156584	2
RCN1	1.21231	1.5222	-0.165633	-0.0173095	-0.948956	0.834595	-1.4161	-0.334849	-0.686253	4
USP7	1.12909	1.53298	-0.700665	-0.653655	-1.25433	0.849296	-0.664905	0.469261	-0.707078	11
GDAP1	-1.52685	0.534383	0.520175	0.985736	0.0178594	0.534383	-0.811042	-1.38526	1.13061	17
CSK	0.177229	1.27356	-0.259611	-0.275221	1.36406	0.521383	-1.33487	-1.51229	0.0457597	2
LPCAT3	-1.67098	0.682423	0.299886	-0.189527	0.661045	0.682423	0.214296	-1.65065	0.971087	17
WFS1	-1.17564	1.24773	0.208152	-0.447244	0.0294214	1.02737	-0.0347589	-1.73032	0.875284	17
RHOT2	-1.81676	0.668497	0.550611	0.870335	0.175331	0.668497	-0.593889	-1.31605	0.793425	17
FGB	-0.731657	-0.530798	-0.642945	-1.33663	0.873936	0.873936	0.73743	1.52408	-0.767352	8
ACP2	0.757822	0.764092	0.35745	0.98869	-0.688801	-0.466037	-0.894173	0.98869	-1.80773	2
ACSS1	0.915885	1.02658	0.787495	0.693773	-1.09227	0.726393	-0.831239	-0.873238	-1.35337	14
MUT	0.663876	0.385985	1.00172	0.919597	-0.0232364	0.760633	-1.21007	-1.69453	-0.803975	14
MRPL15	-0.975176	0.788213	1.06848	1.00192	0.257659	0.788213	-1.3609	-1.29047	-0.277932	5
CNTNAP1	-0.504396	-2.40491	0.334834	0.396133	0.206526	1.02137	0.258775	-0.0420762	0.733738	3
RCC1	-0.153154	-1.41328	0.541279	0.313715	-1.76064	0.880611	-0.229507	0.940369	0.880611	8
EIF5B	-0.300212	-2.14227	0.464773	0.529501	0.117248	1.44216	-0.574138	0.61473	-0.151789	10
SYNPR	-1.16887	-0.459588	-1.86348	0.251742	0.763718	0.791211	-0.123784	0.791211	1.01783	8
PDK3	-0.0125922	-2.08288	0.905441	0.531161	1.04548	0.919911	-0.553981	-0.253399	-0.499141	5
SMARCA2	-0.349636	-0.405345	0.322539	0.147483	0.235406	-2.27654	0.879477	1.23798	0.208632	20
CARKD	0.0414674	1.23415	-0.78924	-0.228307	0.889842	1.38899	-1.19477	-0.0583177	-1.28381	2
RRBP1	-0.56589	-0.255916	-0.0353032	-0.888799	-1.30865	1.61778	0.0448335	-0.176526	1.56848	23
AC011841.1	0.549601	1.00182	-0.670396	-0.272979	-1.18349	0.890519	0.12287	1.17129	-1.60924	19
TTLL12	1.12123	1.54374	-0.552513	-0.715136	-1.2239	0.664377	-0.881514	-0.620659	0.664377	21
COPS2	1.00123	1.65382	-0.46512	-0.856136	-1.32951	0.607853	-0.786576	-0.433411	0.607853	21
TMEM120A	-0.381944	-1.76554	0.317197	0.509926	0.642682	0.827122	0.464537	-1.50593	0.891946	15
GCLM	1.30487	1.47761	-0.730699	-0.974087	-0.856731	0.631207	-0.750327	0.631207	-0.733057	11
U2SURP	0.25645	-1.34457	0.0395326	0.11622	-0.149349	1.21273	0.772097	0.892753	-1.79587	1
SMARCD2	-0.673968	-0.231761	-0.821473	-1.3683	-0.593285	0.947563	1.27376	1.4394	0.0280661	8
SPINT1	-2.07942	1.13829	0.113514	-0.00894083	-0.235464	1.13829	-0.0529635	-0.718451	0.705153	25
ZADH2	0.250279	0.0613571	0.358998	0.809107	1.20272	-0.0458425	-1.75164	-1.50117	0.616191	5
PRPF39	-1.46519	0.866955	0.208655	0.266728	-0.264337	0.866955	0.320285	0.96797	-1.76802	19
BZW2	1.33629	1.49761	-0.421414	-0.784281	-0.526253	0.251075	-0.268816	0.501644	-1.58585	11
CLCA2	-1.07465	-1.81571	0.20878	0.507776	0.0365826	1.13737	-0.323188	-0.0357192	1.35875	10
PRELP	0.0295592	-0.026953	-1.16404	-1.25906	-1.15149	0.889053	0.376156	1.41772	0.889053	8
PACSIN3	1.18111	1.62771	-0.831216	-1.35119	-0.158457	0.84635	-0.156816	-0.540079	-0.617411	21
ABAT	0.883992	0.887403	0.524794	0.635054	0.186996	0.663501	-1.00486	-0.934622	-1.84225	14
AAAS	-1.63754	-0.379006	-0.0714844	-0.615589	-0.954539	1.48449	0.498571	0.727231	0.947869	8
TJP2	-0.813029	-0.180246	-0.80069	-0.56628	-0.87957	1.80339	-0.493949	0.639841	1.29053	23
XPO7	1.20378	1.70407	-0.781595	-0.787796	-0.68593	0.808109	-0.112666	-0.243421	-1.10456	11
ATG3	0.996573	1.72275	-0.799261	-1.16919	-0.825462	0.792539	-0.322961	0.322757	-0.717742	11
CLINT1	0.738822	1.09254	-0.929659	-1.40909	-0.775397	1.16184	-0.021687	0.92247	-0.779839	21
HSD17B11	-1.32645	0.693598	0.206656	-0.160155	0.575911	1.03818	-0.531488	-1.64025	1.14399	17
MAP1S	0.692441	1.22609	-1.25859	-0.61721	-1.73303	0.626104	-0.0715252	0.509621	0.626104	21
COPS7A	1.36418	1.32482	-0.51445	-0.658924	-0.772609	0.668666	-1.16258	-0.917767	0.668666	21
C3H6ORF203	-0.527397	0.808811	0.205317	0.688942	-0.3587	1.89635	-1.22776	-1.07082	-0.414745	2
SF3B4	-0.731654	-0.365877	-0.764529	-0.301445	-0.405617	2.24861	-0.559187	1.0461	-0.166391	22
PRRC1	0.977867	1.46576	-1.29805	-1.35166	0.146166	0.578152	-0.333161	-0.76323	0.578152	21
MAN2A2	-0.925619	0.956777	-0.303542	-0.350116	0.525397	0.956777	0.00464696	-1.92348	1.05916	17
GALK2	1.01879	1.68717	0.61839	-0.366361	-0.948113	0.61839	-0.964758	-0.871645	-0.791865	4
APLP2	-1.07085	-1.1469	0.865504	-0.608215	0.653398	1.15879	-0.03648	-1.05453	1.23927	10
ETF1	1.09274	1.26708	-0.415455	-0.713022	-0.582527	0.7739	0.00236425	0.420105	-1.84518	11
TOM1	-0.907815	-0.963753	-0.804489	-0.462512	0.198452	1.23438	-0.685742	0.699238	1.69224	8
MRPL48	-1.67365	0.873921	-0.193363	0.349751	-1.33166	0.873921	-0.0658282	-0.142221	1.30913	8
CHERP	-0.699949	-1.92513	0.170837	0.0624997	-0.338055	1.19096	0.24116	1.46677	-0.169093	16
MRPL13	-0.252508	0.724888	0.199806	1.4983	-0.765996	0.724888	-0.724329	-1.82101	0.415955	17
PMPCA	0.686919	0.457554	0.969056	0.991058	-0.519803	0.846397	-1.36661	-0.578365	-1.48621	14
SDR16C5	-0.262357	-1.76164	0.47975	0.365615	0.895822	0.746047	0.560073	-1.57646	0.553148	10
MYOF	-1.25995	-1.95102	0.114073	0.134722	-0.0716706	0.95334	0.649034	0.387773	1.04369	3
MRPL23	-0.663918	0.767599	1.11815	1.22893	0.021793	0.767599	-1.08458	-1.32295	-0.832631	5
ENTPD8	-0.764961	-1.82979	0.142952	-0.457063	-0.43623	1.27833	0.209818	1.27833	0.578606	16
OGFOD3	-0.332318	-1.83599	0.510467	-0.161793	0.635227	1.0081	0.291471	-1.2239	1.10873	10
SRP72	0.437724	1.08912	-0.80324	-1.13041	-1.4057	1.01671	0.123047	1.18728	-0.514529	19
ITGA8	-1.13529	0.789949	0.501805	-0.683908	0.204459	2.00286	-1.02508	-0.48411	-0.170687	22
CRELD1	-1.13648	0.973365	-0.411128	-0.462584	-0.492095	0.973365	-0.821267	-0.444304	1.82112	23
SLC44A2	-0.243233	1.04401	0.309886	0.257814	0.57815	1.04401	0.236538	-1.6352	-1.59197	17
LIMA1	0.640145	1.14427	-1.38177	-1.20726	-1.24034	0.258975	0.994938	0.341719	0.449326	21
KIAA2013	-0.259391	-1.20512	0.338122	0.353504	0.451912	0.821446	0.101323	-1.90881	1.30702	10
FKBP8	-0.444436	-0.866502	0.0386485	0.396332	0.550696	0.924552	0.253507	-2.05537	1.20258	10
OGN	-0.147449	0.933442	-1.02113	-1.02017	-0.786928	1.09809	0.68698	1.28907	-1.0319	19
SLC44A5	-0.943935	-1.26478	0.429387	0.447368	-0.690264	1.27294	-1.05885	1.27294	0.535199	16
PRKCA	-0.787176	-2.11219	0.431836	0.412729	0.677215	0.801474	-0.151106	-0.402538	1.12975	3
NRCAM	-1.40067	-1.41116	-0.322145	-0.0474068	0.587909	0.1529	0.163736	0.448173	1.82867	8
TES	1.12876	1.34224	-0.835478	0.683411	-1.47192	0.683411	-0.751849	-0.0306255	-0.747949	21
WDFY1	0.14149	1.03086	0.0849576	-0.346299	-0.398938	1.61444	-0.0851758	-2.00398	-0.0373662	17
LSS	-1.21887	-1.73369	0.466266	0.239847	0.611491	1.07843	0.363296	-0.782638	0.975865	10
DCTN1	1.25493	1.55161	-0.319991	-0.223832	-0.710129	0.871758	-0.758605	-0.26803	-1.39771	4
ABCA5	-1.63537	-1.48273	-0.297991	1.25251	0.269976	0.762449	0.451454	-0.0963339	0.776028	8
PDPR	0.445206	0.169094	0.891874	0.840794	0.72063	0.764805	-1.36856	-0.872492	-1.59135	2
NUP93	0.570565	0.68757	-0.721954	-1.38745	-1.00043	1.07295	0.789993	0.989173	-1.00043	19
QKI	0.562859	1.49386	-0.944572	-0.915302	-1.25688	0.687075	-0.914803	0.600687	0.687075	21
C17ORF62	-0.695391	-1.89832	0.551725	0.318851	1.14576	0.840142	0.895136	-0.669805	-0.488093	10
GOLGA2	0.487072	-0.327622	0.343221	0.0522896	0.297316	1.52503	-1.97896	-0.949231	0.550881	2
TSPAN3	-0.891871	0.601594	-0.926896	-0.402011	-0.690706	1.80673	-0.974906	0.601594	0.876474	23
ACAD8	0.301316	-0.364247	0.912056	1.3396	0.180978	0.974311	-1.5049	-0.59381	-1.2453	2
FBN3	-1.12587	0.751889	-0.121203	-0.427532	-1.73422	0.751889	0.851922	1.2737	-0.22057	19
DPY19L1L	-2.10189	1.24801	-0.378806	-0.0491423	0.07523	1.24801	-0.402731	-0.0290524	0.390374	25
POLR2B	-0.221846	-0.0784127	-0.170038	-0.050517	-0.682682	1.43901	0.415858	1.25407	-1.90545	19
PRKCI	0.678156	-0.254962	-1.5728	-1.48242	0.678156	0.85588	-0.256517	1.23773	0.116773	8
NPLOC4	1.2047	1.359	-0.403719	-0.674529	-1.23657	0.851496	-0.0975856	0.310189	-1.31299	11
TMEM66	-2.12213	1.06282	-0.826228	0.332048	0.0492659	1.06282	-0.339235	0.495809	0.284835	8
HM13	-1.32094	1.35393	-0.243426	0.00496989	-0.109697	1.35393	0.137963	-1.53868	0.361943	25
SORL1	-0.522657	-2.00049	0.294793	0.355204	0.611852	1.22374	0.131595	-0.946501	0.85247	3
TMEM165	0.284041	-1.98018	-0.436785	-0.535294	0.565361	1.75587	-0.101805	0.284041	0.164746	22
PGAP1	-1.05935	1.45663	-0.0249259	-0.526526	-0.233008	1.45663	0.552249	-1.39488	-0.226811	25
YTHDF3	0.332957	-0.499204	-0.681914	-0.619809	-0.93446	2.07439	0.637323	-0.916368	0.607089	22
NAPG	0.122152	0.204734	-0.579121	-0.488605	0.360542	1.948	-1.83161	0.297386	-0.033474	2
ATP6AP1	-0.938967	-0.597226	-0.808864	-0.834171	0.1091	1.51478	0.647865	-0.612467	1.51995	8
MFN2	-1.36673	0.764397	0.57908	0.614156	-0.0927175	0.764397	-0.505943	-1.73849	0.981844	17
SORCS2	-0.426183	1.69995	-0.302926	-0.530311	-0.169904	1.69995	-0.790511	-0.987293	-0.192779	25
FKBP7	1.21627	1.51418	0.0710824	-0.919633	-0.908225	0.964577	-1.14235	-0.407101	-0.388809	4
CADM3	-0.658416	1.15202	-0.001521	0.0445871	-0.78118	1.15202	-0.6645	-1.50514	1.26213	25
UGGT2	-0.879815	-1.48697	-0.0614964	-0.841904	0.19885	1.9408	0.569675	0.364665	0.196191	16
SIRT2	0.894904	1.38557	-0.702618	-1.41605	-0.327991	1.11902	-0.862907	0.534697	-0.624626	21
MTHFD1	1.10483	1.45734	-0.445847	-0.695587	-1.24444	0.872713	-0.0725965	0.280126	-1.25654	11
DDX19A	1.22016	1.39642	-0.378817	-0.620279	-0.963139	0.406615	0.0740531	0.502628	-1.63764	11
CCAR1	0.844682	0.787473	-0.306542	-0.848867	-1.83224	0.422048	0.377126	1.28306	-0.726737	19
CRAT	0.690769	0.643572	0.653314	0.594406	-1.51739	0.700028	-1.29767	-1.16706	0.700028	14
BASP1	1.01203	1.07291	-0.096422	0.0709145	-1.46863	-0.0277656	-1.70237	0.799436	0.339904	21
CYP2D6	-0.378651	-1.88474	0.433153	0.0470775	0.804473	0.292718	0.882984	-1.23487	1.03785	15
MRPL39	0.0511379	0.75857	0.757326	1.07636	-0.150104	0.75857	-0.869007	-2.0568	-0.326053	5
SCP2	1.18656	0.269283	0.474816	0.800768	0.94146	-1.33172	-1.65249	-0.232145	-0.45653	14
IFT122	-0.580727	-0.0861019	0.493216	0.565343	1.34521	1.36202	-0.680405	-1.0676	-1.35095	2
FARP1	0.921742	-1.44179	0.0814621	-0.355923	-0.355923	2.0657	-0.721761	-0.0475455	-0.145961	22
ACOT9	0.535858	0.241285	0.0844048	0.357273	0.377404	1.70681	-1.84187	-0.776785	-0.684382	2
TMED3	-0.916047	0.297414	-0.443577	-0.61051	-0.0219104	2.37052	-0.912077	0.0101798	0.226007	22
ECHDC3	0.389015	-0.0308455	0.346197	0.58114	1.33343	1.01549	-1.54457	-1.12054	-0.969312	2
MRPL44	-0.0350024	0.76705	0.927591	1.06195	-2.96119e-05	0.76705	-0.820281	-1.88236	-0.78597	5
ENDOD1	-1.03121	-1.41214	0.283575	-0.00590209	0.579938	1.02859	0.539504	-1.25143	1.26907	10
ATAD1	-1.99789	0.608827	0.496252	0.76154	0.0170534	1.04602	-1.05287	0.608827	-0.487757	8
RAB24	-0.885107	0.741311	0.597451	0.589963	0.0742648	0.741311	-0.966513	-1.87364	0.980964	17
AGPS	-1.34454	-1.4827	0.812434	0.923558	0.387187	1.24375	0.290776	-0.836277	0.00581455	5
RETSAT	-0.528291	-1.83875	0.410711	0.840235	0.649941	0.999659	-0.0477922	-1.22349	0.737768	6
ENTPD5	0.302099	0.132358	0.634391	0.556956	-1.19297	1.00555	-1.833	1.00555	-0.61094	2
COQ5	-1.42052	-0.716086	0.503114	0.713764	1.29988	1.15814	-0.463963	-1.20178	0.127452	5
FMR1	-0.381514	0.101543	0.0298564	0.492843	-0.601463	1.25759	0.244737	1.00034	-2.14394	19
ACOT13	0.496639	0.340983	0.598934	1.13155	0.637081	0.683411	-1.39102	-1.0602	-1.43738	14
GBF1	0.565151	1.58061	0.429905	0.266167	-0.308908	0.918969	-1.23592	-1.15228	-1.06369	2
CIAPIN1	1.10559	1.21996	-0.655845	-0.651874	-1.75446	0.71241	0.71241	-0.115733	-0.572455	21
SARNP	0.754134	1.33899	-0.427857	-0.644487	-1.95606	0.718737	-0.416209	-0.085989	0.718737	21
DLG1	0.442402	0.774518	-0.215976	-0.703478	-0.50791	2.16055	-1.12184	-0.67433	-0.153937	22
LRRC15	-0.418506	-0.0622206	-0.212202	-1.30761	-0.549973	1.79687	0.189009	1.36392	-0.799292	22
DDX23	-0.377208	0.258008	-0.280608	-0.372185	-0.697228	1.1043	0.705606	1.45944	-1.80012	19
ERO1LB	0.430049	0.663506	0.201134	0.49413	-1.33607	1.0108	-0.920604	1.0108	-1.55375	2
AL445665.1	0.557187	-0.219846	0.997335	0.914819	0.893246	0.5203	-1.50792	-0.80835	-1.34677	5
IMPAD1	-0.412147	-2.12656	-0.13026	-0.342995	0.578289	0.769597	-0.344675	0.769597	1.23915	8
FAM98B	0.668238	1.04515	-0.899063	-1.13803	-0.660967	1.03248	0.306455	0.984357	-1.33862	19
MTCH1	-1.16134	0.56552	0.304229	-0.131705	-0.0770812	1.59785	-0.481151	-1.58117	0.964843	17
UBA5	1.27416	1.18454	-0.671576	-0.556702	-1.3973	0.720416	-1.09004	-0.183912	0.720416	21
PTCD3	-0.75603	-2.30054	0.728834	0.699786	0.567083	0.801761	0.0832457	-0.165283	0.341144	6
DHDH	1.09676	1.37554	-0.635866	-0.40185	0.763482	0.763482	-1.01908	-0.618889	-1.32358	21
ELAVL4	-1.18804	1.16369	-0.242732	-0.407264	-0.847193	1.16369	0.564007	1.03674	-1.24289	19
CYFIP1	0.999129	1.18167	-0.163512	-1.06619	-0.746309	1.40555	-0.320284	0.0530621	-1.34311	12
AP1S2	0.879291	1.61797	-0.902338	-0.925549	-0.548707	1.12136	-0.666578	0.332654	-0.908104	11
MAN2A1	-0.554302	-0.88358	-0.131773	-0.222795	0.59655	1.75612	-0.0372507	-1.53958	1.01661	10
ABCB6	-0.759718	-1.82636	-0.304639	-0.17461	-0.202249	1.28713	-0.0830284	1.28713	0.77634	16
GLRX5	-0.217813	-0.434595	0.770281	0.824339	-0.0531459	1.00032	1.00032	-1.8395	-1.05022	5
EIF4G3	0.824621	1.43136	-0.501957	-0.8907	-1.41729	0.506011	-0.363022	1.13954	-0.728558	21
ACOT7	1.14718	1.41379	-0.683321	-0.502919	0.760387	0.760387	-1.01627	-0.867649	-1.01159	21
RPF2	-0.331016	0.960806	-0.899539	-1.11315	-1.52884	0.960806	0.856433	0.951026	0.143473	19
NFS1	0.0301739	-1.45153	-0.299105	0.417767	1.52645	1.40584	-0.441668	-1.0528	-0.135132	10
SUGT1	1.26506	1.16723	0.80184	-0.809584	-0.947903	0.80184	-0.919637	-0.216604	-1.14224	2
TM9SF2	-0.210944	-1.1175	0.189234	0.345906	0.574588	0.854915	0.410667	-2.06836	1.02149	10
ARMC1	-0.594416	0.989445	1.25211	0.576349	-0.579365	0.989445	-0.239473	-0.682323	-1.71177	2
APPL2	1.20646	1.57602	-0.877812	-1.23022	-0.903923	0.608971	-0.0916749	0.375167	-0.66298	11
TXNRD3	1.08897	1.65286	-0.32044	-0.670954	-1.33151	0.9679	-0.509862	-0.142583	-0.734378	11
DAG1	-0.29915	-2.1217	0.276275	-0.0916019	0.509699	-0.537917	0.545974	0.151938	1.56648	3
TMTC4	-1.80292	1.14417	-0.408663	-0.681781	-0.192987	1.14417	0.177233	-0.476391	1.09717	25
NEXN	0.236713	0.260655	-1.07078	-0.809178	-0.402835	0.978955	-1.40272	0.582022	1.62717	23
PLRG1	-0.776266	-1.4032	-0.391859	-0.575986	-0.122069	1.38141	1.05486	1.29978	-0.46667	16
EIF2S2	0.768597	1.23302	-1.09728	-0.941329	-1.62107	0.735836	-0.0947553	0.28114	0.735836	21
TMEM38B	-2.06425	1.13265	-0.108793	-0.262099	0.403261	1.13265	0.365003	-0.854919	0.256497	25
MYO1H	-1.02742	-0.906977	-0.634201	-1.35263	0.0189468	1.02503	0.869216	1.18745	0.820581	16
PLXDC2	-1.24579	1.49237	-0.796976	-0.951086	0.568116	1.49237	-0.309572	-0.170769	-0.0786609	25
STX2	-1.89277	1.11052	-0.353599	-0.594607	-0.265135	1.11052	0.106709	-0.348285	1.12664	25
UFL1	-0.211148	1.23333	-0.317315	-0.565762	-0.112136	2.10469	-0.727565	-0.869622	-0.534472	22
PPP2R5E	1.12015	1.66016	-0.6966	-1.06847	-0.733592	1.00069	-0.522599	-0.0186451	-0.74111	11
ALG2	1.23184	-1.84202	-0.270188	0.0248905	0.41542	1.23184	-0.502035	-0.863161	0.573414	8
ADAM10	-0.79704	1.23335	0.191359	0.240721	-0.116152	1.23335	-0.881948	-1.74083	0.637186	17
SORBS2	-0.971954	-1.37802	-0.375688	-0.985471	-0.0918439	1.09495	0.998151	1.29002	0.419858	16
IAH1	1.11074	1.30977	-0.599515	-0.356677	0.799	0.799	-0.918697	-0.801872	-1.34175	21
NPC1	0.382276	0.910738	0.278839	0.0369857	-0.37332	1.4742	-0.635355	-2.05637	-0.017991	17
TMEM87A	-0.386415	-1.19811	0.566973	0.266282	0.584237	1.08867	0.459253	-1.98118	0.60029	10
SLC7A5	-1.03747	1.04435	0.0697169	0.329601	0.191873	1.04435	-0.703055	-1.82181	0.882449	17
DDRGK1	0.844686	-1.45063	0.0247405	-0.382042	0.511273	1.76497	0.340731	-1.12317	-0.530557	22
UAP1L1	0.990514	1.31447	-0.565614	-0.980968	0.786397	0.786397	-0.921213	-0.023322	-1.38666	21
TSPAN6	0.273196	0.462985	-0.378478	0.243346	-0.155424	2.00153	-0.466147	-1.79635	-0.184662	2
ERMP1	-1.14671	0.876328	0.357643	0.231551	0.361652	0.876328	-0.0173088	-2.12095	0.58147	17
DNAJC13	-0.395244	-1.46677	0.587049	0.117732	-0.248816	2.10656	0.0837082	0.117732	-0.901949	10
WDR5B	-0.313939	-0.529637	-1.11133	-1.40896	-0.577089	1.1133	0.61293	1.10141	1.1133	8
USP9X	1.16654	1.19029	0.0561834	0.557669	-1.04069	0.867034	-0.879249	-0.478566	-1.43922	2
SMARCB1	-1.16457	1.28253	-0.609707	-0.712806	-0.0997706	1.28253	0.154319	1.03637	-1.1689	25
PTX3	-0.393162	-1.49587	-0.107964	-0.906054	-0.514893	1.90298	0.229087	0.573895	0.711982	16
GSPT1	1.14626	1.53864	-0.707135	-0.666462	-0.916771	1.00079	-0.644872	0.270911	-1.02136	11
YES1	0.77154	0.48513	0.343967	0.260697	-0.55241	1.63838	-1.03966	-1.69316	-0.214488	2
RBM12B	-0.583771	-1.77278	0.169305	-0.202543	-0.168753	1.29989	0.537312	1.40463	-0.683294	16
CLPX	-0.15283	-1.62726	1.02253	0.610625	1.51262	-0.189785	-1.10064	-0.468893	0.393631	5
RALY	-1.75247	1.13243	0.635226	0.315913	-0.73114	1.13243	0.426502	-0.0932533	-1.06563	25
HDGFRP2	-0.793679	-0.897047	0.643312	0.100861	-0.0601086	1.67315	-1.5803	-0.0032345	0.917049	10
CYP46A1	-1.41003	0.958584	0.291141	0.487659	0.117453	0.958584	-0.172048	-1.85058	0.619233	17
UBE2O	0.548452	0.53804	0.0600894	-0.463501	-0.717021	2.03426	-1.04407	-1.18228	0.226033	2
MARS	1.22522	1.51846	-0.274299	-0.973338	-0.533694	0.989649	-0.415514	-0.242302	-1.29418	11
LAMA1	-0.795401	-0.385492	-0.232411	-0.178209	-1.16339	1.62233	0.660598	1.37611	-0.904132	19
RDH14	-0.480594	1.00836	0.395798	0.406113	-0.205746	1.00836	-0.083902	-2.30219	0.253801	17
STX8	-1.72292	1.17714	-0.277397	0.148463	-0.434231	1.17714	-0.67435	-0.51369	1.11985	25
NFASC	-0.619106	-1.15817	0.0221454	-0.0759214	-0.618318	2.06583	-0.115262	-0.611247	1.11006	10
ALG5	-0.468438	-1.81599	0.208912	-0.325907	-0.224052	1.21751	0.738041	-0.67282	1.34274	10
KIAA1715	-0.728251	-1.88415	-0.134721	-0.350111	0.740517	1.09624	0.328103	-0.395929	1.32831	10
LAP3	0.563222	0.353587	0.8122	0.932635	-0.50857	1.21203	-1.61324	-1.16192	-0.589947	14
NEDD4L	-0.613145	-1.87517	-0.0861175	0.083331	0.132976	0.881325	0.72946	-0.741603	1.48894	10
WARS	1.15156	1.29529	-0.547462	-0.817082	-1.36113	0.79889	-0.78166	-0.537297	0.79889	21
DDO	0.993301	-1.76012	0.742502	0.400518	-0.166662	1.44581	-0.291835	-0.493693	-0.869818	5
ACOT8	-0.752623	-2.20194	0.266095	0.633847	0.678069	-0.419833	0.150832	0.599429	1.04612	3
NCKAP1	0.658546	1.17616	-0.163596	-0.77911	-1.22343	1.78004	-0.387123	-0.238684	-0.822803	12
TCIRG1	-0.789034	-1.93196	-0.101773	-0.0907825	0.470514	1.37472	0.261704	-0.345475	1.15208	10
EPHA7	-1.87675	-0.022382	0.0988561	-0.614413	-0.220974	1.85543	-0.248221	0.57797	0.450487	8
MRPL41	-1.41561	0.933456	0.475063	1.10967	0.145752	0.933456	-0.456089	-1.59703	-0.128676	17
AHSA1	1.41937	1.58969	-0.584919	-0.805108	-0.976597	0.605009	-0.375427	0.123926	-0.995936	11
SLC44A1	-1.68078	-1.34135	0.536281	0.557379	0.2764	1.19625	0.244889	-0.665198	0.876132	10
SLC26A5	0.141126	0.277837	0.520641	0.73171	0.171299	1.28051	-1.03344	-2.08791	-0.0017659	17
LZIC	1.20183	1.19042	-0.740465	-0.574232	-0.335618	0.792584	-0.86043	-1.46667	0.792584	21
ZBTB20	-1.33048	-1.6156	-0.118409	0.121014	-0.132119	1.31656	0.268331	1.31855	0.172153	16
SMC3	-0.875289	-1.35622	-0.594366	-0.889692	0.0413984	1.26203	0.718949	1.4403	0.25289	16
NUP205	0.11491	0.477716	-0.591456	-0.670252	-1.09116	1.30322	0.715353	1.19851	-1.45684	19
YKT6	1.08651	1.64148	-0.557022	-0.752799	-0.557358	1.06465	-0.271447	-0.401317	-1.25269	11
ACTR10	1.17587	1.48646	-0.332902	-0.831504	-0.972834	1.1659	-0.677375	-0.102293	-0.911324	11
KIAA1467	-0.874189	-1.89147	0.0352438	-0.298471	0.0601766	1.30698	-0.0286603	1.30698	0.383414	16
SEC23B	1.05461	1.40159	-0.657594	-0.884554	-0.798932	0.839989	-1.05223	-0.742866	0.839989	21
TMTC3	-1.94646	1.01724	0.559975	-0.0771125	0.258787	1.01724	0.164232	-1.28256	0.288663	17
COLGALT2	-0.617149	-0.478374	-1.18307	0.638055	-1.66287	0.779946	0.925795	0.994671	0.602994	8
OLFML3	-0.469984	-1.28808	-0.773405	-0.402627	-0.291185	1.38735	1.06841	1.36266	-0.593148	16
POLDIP3	0.313901	0.297062	-0.493601	-1.05374	-0.98961	1.19214	0.72634	1.33249	-1.32498	19
PLIN5	0.860483	1.39793	-1.05224	-0.868647	0.93303	0.93303	-0.804172	-0.50396	-0.895459	21
MICU3	0.302313	0.721368	-0.600631	-1.70652	-1.06641	1.22471	0.265753	1.1502	-0.290786	19
ENDOG	-0.243178	-1.50615	0.222109	0.217443	-1.31279	1.72514	0.419078	-0.302217	0.780565	10
TPD52	0.905023	1.27982	-0.0781136	-0.192361	-0.943836	0.802318	0.802318	-1.34185	-1.23332	21
MRPL21	-0.496922	-1.74941	0.710324	0.671865	0.524139	1.53493	-0.00262221	-0.151648	-1.04065	5
ITPR1	-0.9145	-2.29862	0.311298	0.43979	0.294172	0.987699	0.477936	0.188867	0.513358	3
PLXNB2	-0.446759	-1.88002	0.575766	0.630524	-0.406651	1.57896	0.0494217	-0.710484	0.609242	10
ACSF2	0.535266	0.797278	0.510821	0.757811	0.233434	1.04632	-1.07353	-1.41161	-1.39579	14
HID1	0.557395	0.00719221	0.353998	0.255377	-0.124973	1.57095	-0.953242	-1.99903	0.332326	17
LMF1	-0.691256	1.09542	-0.717712	-1.11943	0.0331765	1.09542	1.22493	-1.30549	0.384946	8
ABCA10	-1.05559	-2.1977	0.299635	0.571128	0.133876	0.27582	0.66881	0.299635	1.00439	3
SAP18	-1.10305	0.581359	0.127898	0.300425	-2.4706e-05	2.05301	-1.34648	-0.058737	-0.5544	2
COQ6	0.57654	-1.3524	0.585178	0.503931	0.908698	1.0296	-0.645426	-1.71137	0.105251	5
SREK1	-1.43693	1.41122	-0.117268	-0.10336	-1.01452	1.41122	-0.258496	0.696629	-0.588503	25
COPS5	0.841915	1.51235	-1.1834	-0.795568	-0.534979	0.855043	-0.876002	-0.674406	0.855043	21
ABHD11	0.347456	0.239601	-0.123237	0.349336	0.895907	0.872983	-1.69748	0.75087	-1.63543	2
MINPP1	0.545353	0.365867	0.838241	0.854117	-1.08665	1.37907	-0.919275	-1.34552	-0.631204	14
PLXNA1	0.981028	1.65795	-0.553614	-0.545387	-0.757081	1.22336	-0.598263	-1.06864	-0.339347	21
PPID	1.21577	1.31	-0.227889	-0.337435	-1.36379	0.998107	-0.433076	0.0979757	-1.25965	11
SRRM1	-0.481022	-2.40958	0.295915	0.576333	0.210636	1.12637	0.00872126	0.377986	0.294635	3
BCL2L13	0.88677	0.170469	0.185802	0.750709	-0.472198	1.39099	-0.95519	-1.87329	-0.0840625	2
SF3A1	0.576043	0.980941	-0.510117	-1.39818	-1.35688	1.09316	-0.508648	0.030518	1.09316	23
ERLEC1	-0.522049	-1.65763	0.525342	-0.566543	0.851998	1.11729	-0.287808	-0.774387	1.31378	10
SORBS1	-0.0607332	0.514053	-0.160111	0.925465	-0.0545827	1.87829	-1.04099	-1.34169	-0.659695	2
MRPL22	-0.575743	1.20171	0.245686	0.880911	-0.115955	1.20171	-0.997748	-1.70805	-0.132513	17
IGF1R	-0.907894	-1.88898	0.387564	0.0122823	0.0191723	1.71233	0.205133	-0.203742	0.664132	10
PEF1	-1.78116	1.36054	-0.170662	0.0309909	0.332072	1.36054	-0.0953819	-0.0503457	-0.986586	25
TSG101	1.43862	1.83893	-1.10028	-0.761309	-0.0958486	0.0457271	-0.700888	-0.200375	-0.464574	13
RTN4IP1	-0.384461	-1.24816	0.41603	0.494763	1.29444	1.57938	-1.01858	-0.451417	-0.681999	10
SDCBP	-0.0280056	0.191616	-0.48285	-0.0684697	0.33008	1.63004	-0.908646	-1.73059	1.06682	2
PLIN2	0.475437	0.304873	-0.835102	0.0409393	0.251022	1.51975	-0.448265	-1.987	0.678345	2
SUPT5H	-0.66964	-1.59419	-0.259109	-0.48441	-0.275077	1.77318	0.560109	1.07639	-0.127256	16
ARSA	0.721094	1.09518	-0.204817	-0.383633	-0.732336	1.04017	-1.09579	1.04017	-1.48003	21
HMGCL	0.390809	-0.0986938	0.656243	0.753385	0.689593	1.13757	-1.90556	-1.05752	-0.565817	2
VPS45	0.682357	1.07935	-0.0363432	-1.06785	-0.0295311	1.47187	-0.442525	-1.69218	0.0348556	2
PLS1	0.646898	1.32711	-1.16557	-1.49476	-0.783851	1.09401	0.194587	0.516111	-0.334535	21
LACTB	-0.478598	-0.720027	0.493425	0.703281	0.453792	1.2606	-0.0721759	-2.11801	0.477716	10
PMPCB	0.42785	-0.70124	0.222039	0.517692	-0.4722	1.44383	-1.98566	0.824966	-0.277277	2
MTA1	0.221847	-0.26081	-0.66815	-0.92119	-0.838152	2.11458	-0.0784378	1.02603	-0.595724	22
PTK7	-0.188158	0.940121	-0.191355	-0.291707	-1.57274	1.84551	-0.322166	-0.799584	0.580078	22
GFM1	0.661444	0.540508	0.725173	0.810816	-0.258697	1.01775	-1.66229	-1.43601	-0.39869	14
AGFG1	-0.553436	0.172064	0.360828	0.141754	-0.69037	2.16561	-0.738417	-1.27576	0.417732	17
APOAIV	0.014854	-0.0182125	-0.841215	-0.821798	-1.38583	1.34684	-0.543575	1.29422	0.954713	23
ABHD10	0.433454	-0.0384425	0.670577	0.836934	0.237468	1.20981	-1.69239	-1.50056	-0.156855	2
B3GALT6	-1.77927	1.02803	-0.812036	-0.916892	0.0447808	0.292887	0.0514522	1.02803	1.06301	8
STX18	-1.14324	-1.8893	0.411246	-0.289936	0.735188	1.43726	0.320506	0.0168283	0.401441	3
UFSP2	-0.27794	-1.27959	0.637825	-0.145296	0.546991	1.69358	-0.999693	-1.00314	0.827262	10
ACOX2	-1.81566	1.41431	-0.187283	0.00851788	-0.302783	1.41431	0.307721	-0.165329	-0.673795	25
MTPAP	-0.680029	-2.12823	0.0956268	-0.0769409	0.405002	1.16522	0.554727	-0.354272	1.0189	3
RAB22A	0.949825	-0.361507	-1.15118	-1.16899	0.539803	1.94121	-0.111607	-0.320718	-0.316828	22
VTA1	0.94236	1.25458	-0.204926	-0.582941	-0.744712	0.874275	-0.922023	0.874275	-1.49089	21
TTYH3	-0.327612	1.59821	-0.641042	-0.825796	-0.874069	1.59821	-0.612632	0.565966	-0.481242	25
CTAGE5	-0.303864	-1.88635	0.486977	-0.00712334	0.613372	1.21433	0.22163	-1.20745	0.868485	10
FXR1	0.502865	1.24491	-0.43851	-0.657109	-1.55394	1.49968	-0.741768	0.4896	-0.345728	12
PDS5B	-0.255348	-0.136137	-0.531825	-0.882215	-0.776121	1.54235	0.638411	1.50159	-1.10071	19
CASK	0.0951415	-0.721354	0.446277	0.739887	-0.853831	2.12621	-0.394521	-1.09633	-0.341476	2
PTPRA	-1.4626	1.54135	-0.132911	0.154839	-0.874142	1.54135	0.0056306	-0.433393	-0.340118	25
PSMD5	1.00002	1.60973	-0.374525	-0.499718	-0.961136	1.11652	-0.5752	-0.086885	-1.2288	11
ARFGEF2	1.82159	0.553923	-1.60935	-0.365175	-0.823228	0.258135	-0.447507	-0.204073	0.815685	8
DRG1	1.23766	1.2264	-0.842417	-0.749116	-1.17316	1.16171	-0.170858	0.246522	-0.936734	11
SEC24A	1.19608	1.43252	-0.565902	-0.473748	-1.0795	1.17667	-0.194109	-0.377236	-1.11478	11
QSOX2	-0.769868	-1.38351	0.159938	0.0556013	0.408854	1.6939	0.0243882	-1.19228	1.00297	10
AIMP1	0.864557	1.35575	-0.444645	-0.823352	-0.81389	0.940921	-1.19048	0.940921	-0.829782	21
SPTLC2	-1.2041	1.22784	-0.140687	0.00950731	0.174917	1.22784	-0.933306	-1.3097	0.947686	25
WDR61	1.0745	0.531205	-0.677658	-0.623984	-0.365622	1.51444	-1.56063	-0.596562	0.704316	2
VCAN	-0.405765	-1.49028	1.06167	-1.21517	0.118667	0.946645	1.39408	-0.395911	-0.0139297	8
ATP2C1	-1.22795	-0.973452	0.301589	-0.0223825	0.614082	0.757888	0.590523	-1.46099	1.42069	10
SEC23IP	1.27596	1.26666	-0.243611	-0.574475	-0.792961	1.2148	-0.739252	-0.0964803	-1.31065	11
ITPR3	-0.492321	-2.366	0.309754	0.156742	0.302962	-0.0563327	0.71178	0.263807	1.16961	3
DYNC1LI1	1.18745	1.46041	-0.545671	-0.589955	-1.2201	1.20548	-0.754414	-0.261572	-0.48163	11
ADCK3	0.309535	-0.765172	0.126269	0.471518	1.03041	1.75548	-1.03832	-1.13635	-0.753379	2
STAT3	0.204462	1.02302	-0.920837	-1.26591	1.25215	1.25215	-0.395506	-0.0706585	-1.07888	24
AQPEP	-1.46598	-1.07192	0.0474106	-0.316726	-0.281213	1.50223	0.00110331	1.50223	0.0828758	16
PTPN11	0.913027	0.676147	-0.778119	-0.735023	-0.455131	1.998	-1.09471	-0.381622	-0.142566	22
MAP2K1	0.909494	1.42507	-0.486922	-0.471407	-0.663321	1.27176	-0.978138	0.258964	-1.2655	12
COL4A2	-1.28512	1.0482	-0.174423	-0.205722	-1.53032	1.0482	0.5116	1.10066	-0.513063	19
IRF6	0.816378	1.24693	-0.472344	0.905262	-1.03446	0.905262	-0.613075	-0.194166	-1.55978	2
NONE	0.370875	0.605258	0.497395	0.312992	-0.601835	0.874219	0.874219	-0.77431	-2.15881	2
ATAD3A	-0.816513	0.957153	0.315434	0.292769	0.124957	0.957153	-0.447452	-2.13101	0.74751	17
IRF2BPL	0.503862	0.750126	-0.789426	-0.9548	-1.15074	1.29415	0.145691	1.24252	-1.04138	19
MAPK14	1.00491	1.2559	-0.342293	-0.88432	0.878194	0.878194	-1.29257	-0.450249	-1.04776	21
CRNKL1	-1.5363	1.16658	0.149236	-1.04738	-0.736089	1.16658	0.3877	0.933868	-0.484205	25
SSBP1	0.0513304	-0.680431	0.0673945	0.0852582	0.0491665	2.31961	-0.874454	-1.16347	0.145597	2
MGLL	0.771948	1.45407	-0.345178	-0.49298	-1.14639	1.43588	-0.557624	-0.00589003	-1.11384	12
TIMM44	-0.233085	-0.961702	0.439118	0.217243	1.61379	1.43344	-0.798116	-0.959049	-0.751637	2
PTPRE	-1.05468	-0.889895	-0.360806	-0.782605	-0.39243	1.55773	-0.256956	0.682937	1.49671	16
UBTF	-1.85512	1.37199	-0.0619439	-0.7422	0.0991987	1.37199	0.262698	-0.39731	-0.0493056	25
FAP	-0.934319	-1.14845	-0.608194	-1.08485	0.232501	1.71132	0.614256	0.32614	0.891605	16
SCO1	-0.879039	0.957602	0.651873	0.393697	-0.107873	0.957602	-0.447664	-2.07395	0.547754	17
TPR	0.576341	0.941815	-0.863779	-1.3036	-0.836424	1.39835	-0.172143	1.0289	-0.76946	12
L2HGDH	-0.502426	1.34461	0.0366224	0.090678	0.544569	1.34461	-0.597775	-1.80584	-0.455054	17
NCALD	0.0533148	-0.13828	-0.376611	-0.101385	-0.380302	1.98981	0.422033	0.376005	-1.84458	22
CHD4	0.107609	-1.02524	-0.136899	-0.635126	-1.04736	1.64635	0.276451	1.47945	-0.665233	22
PCDH1	0.840951	-0.446874	-0.881046	-1.02008	-0.421249	1.83974	-0.977844	0.840951	0.225449	22
GOLGA5	-1.29743	-0.891614	-0.474452	-0.454571	0.791918	1.65931	-0.19538	-0.374999	1.23722	8
CAPN2	0.886578	1.07687	-0.52038	-0.31986	-0.777288	1.54193	-0.0318401	-0.229389	-1.62662	12
ITGA11	-1.47478	1.55952	-0.456808	-0.464641	-0.679661	1.55952	0.196457	-0.0605952	-0.179014	25
STRN3	0.991678	0.739222	-0.708562	-0.481292	-0.964587	1.57338	-1.49772	0.0581833	0.289699	12
IGF2R	-0.624347	-1.51006	-0.112839	-0.0848519	0.433012	1.8396	0.118538	-0.957572	0.898528	10
SLC39A11	-0.927603	-1.49475	-0.508911	-0.459669	-0.0559774	1.25996	-0.179623	1.25996	1.10661	16
NDRG4	0.0745864	0.500778	-1.17421	0.15152	-0.88537	1.46318	1.46318	-0.853445	-0.74021	8
TARS	1.01212	1.07852	-0.271847	-0.352089	-1.69031	0.884251	-0.76174	-0.783153	0.884251	21
RBM22	-1.65183	1.38129	-0.300206	-0.71064	-0.42147	1.38129	-0.130741	0.756905	-0.304593	25
COMMD4	0.91906	0.830099	-0.931913	-0.28083	-0.994613	1.67133	-1.02777	0.483023	-0.668384	12
VPS4B	1.04472	1.13686	-0.75487	-0.865784	-0.394352	1.27731	0.22024	-0.098394	-1.56572	12
VSNL1	-0.277969	0.28857	-0.208785	0.0508318	-0.901804	2.2717	-0.396948	0.399926	-1.22552	22
TRAM1	0.180685	1.58373	-1.18091	-0.956685	-0.300868	1.58373	-0.00542537	-0.185924	-0.718335	22
IPO7	0.933937	1.40556	-0.698089	-0.684717	-0.854911	1.11169	-0.27397	0.455697	-1.39519	11
HK2	-0.956242	1.24494	0.615054	0.391721	0.54564	0.592723	-0.657287	-1.97106	0.194509	17
WASF2	0.621367	1.20212	-1.30459	-0.630734	-0.55788	1.51598	-0.910817	0.5926	-0.528049	12
CLPTM1L	-1.01527	1.60883	0.0980701	-0.192084	-0.422942	1.60883	0.072594	-0.787869	-0.970153	25
PDK1	-0.298567	-0.878762	0.747308	0.400079	1.01818	1.535	-0.176307	-0.825597	-1.52134	5
ANO5	-1.77299	1.24378	0.172704	-0.883332	-0.688001	1.24378	0.373194	-0.226334	0.537198	25
ABCA13	-1.57571	-1.42162	-0.210129	0.310551	-0.374348	1.43477	0.465359	0.672834	0.698288	16
EGFR	-1.75074	1.42043	0.157973	-0.036495	-0.0567572	1.42043	-0.562117	-0.731393	0.138664	25
CPM	-0.484861	-1.03327	-0.0652655	-0.0201409	-0.028838	1.87326	-0.0702735	-1.34292	1.17231	10
COQ4	-0.408908	1.00008	0.346767	0.437077	0.582889	1.00008	-0.279042	-2.20987	-0.469075	17
FAAH2	-2.18963	1.07519	-0.370839	0.103237	0.151411	1.07519	-0.146685	-0.421294	0.723415	25
PRKCD	-0.00309388	-0.972512	-0.0808539	-0.830001	-0.389358	2.40891	0.0258448	-0.521646	0.362713	22
EWSR1	0.301943	0.62785	-0.752672	-1.13282	-1.33527	1.83512	-0.131209	-0.109383	0.696442	22
PNKD	-1.70519	1.13819	0.129481	-0.16389	0.297678	1.13819	-0.208638	-1.34485	0.719033	17
CCPG1	-1.56158	1.30397	-0.00408782	-0.456585	-0.197085	1.30397	-0.621511	-0.749591	0.982492	25
EIF4G2	1.14361	1.44725	-0.560823	-0.813783	-0.785073	1.2149	-0.0550542	-0.435101	-1.15593	11
POLDIP2	0.178443	-0.503304	0.202513	1.0559	0.226247	1.78488	-1.51003	-0.796821	-0.637832	2
EML4	1.12294	1.37011	-0.625014	-0.422363	-1.26015	1.29414	-0.690492	-0.046848	-0.742314	11
GALC	1.17475	1.58568	-0.118713	0.422356	-0.703679	0.441793	-0.847236	-1.52248	-0.432471	4
NRF1	-0.621039	-0.455349	-0.461919	-0.0871533	-0.0790875	1.94105	0.0200805	1.17146	-1.42805	22
SGCE	-0.201809	1.45569	-1.28949	-1.24452	-0.144126	1.45569	0.180958	-0.571764	0.35937	8
SULT1E1	0.900168	1.13801	-1.13065	-1.25923	0.992248	0.992248	-0.743924	-0.206731	-0.682134	21
SIRT5	0.877449	0.927954	0.421269	0.312793	-0.671278	1.39342	-1.33584	-0.785857	-1.13992	14
CEP41	0.659518	1.11123	-0.666716	1.01784	-1.23971	1.01784	-0.763075	0.155501	-1.29242	2
LDHD	0.556893	0.678764	0.191464	-0.27994	0.203115	1.58723	-1.63995	-1.36373	0.0661464	2
CD55	-0.821884	1.43296	-0.687569	0.0511302	-0.898735	1.43296	-1.15644	-0.116459	0.764038	25
NUP160	-0.0260085	0.308061	-0.821947	-1.41751	-1.38393	1.16161	0.300147	0.717955	1.16161	23
ECHDC2	0.831405	0.786859	-1.48663	1.09138	-1.2056	1.09138	-0.75799	-0.113093	-0.237715	2
CELSR1	-1.43488	1.44902	-0.692779	-0.533186	-0.684332	1.44902	-0.0468395	-0.191805	0.685775	25
SCRIB	0.164255	-1.55487	0.379482	0.164835	-0.760968	2.07205	-0.661804	-0.0663134	0.263333	10
Q8UWF3	0.475804	0.0147872	-0.420193	-1.22599	-1.48622	1.68309	-0.193554	0.994951	0.157317	22
DIABLO	0.599898	1.03451	-0.187957	-0.646265	-1.53605	0.29821	0.920988	0.920988	-1.40432	19
PPP6C	0.742927	1.02717	-1.1064	1.04321	-1.20737	1.04321	-1.19499	-0.0220431	-0.325709	2
EML1	1.11072	1.3536	-0.121675	-1.11083	-1.15604	1.22906	-0.260917	-0.186307	-0.857618	11
LARS	1.13817	1.42043	-0.415919	-0.645289	-0.956253	1.238	-0.539537	-0.0761574	-1.16344	11
PDLIM5	1.03263	1.14077	-0.831485	-0.808258	-1.25314	0.963459	-0.860485	-0.346949	0.963459	21
LAMC3	0.349439	0.0286629	0.441816	0.493491	-0.893972	1.69254	-1.03428	0.491682	-1.56938	2
STXBP3	0.625917	0.0283843	0.39486	-8.27207e-05	-0.35953	2.14431	-0.859626	-0.852132	-1.1221	2
PDXDC1	0.749969	0.763151	-0.870719	-1.14593	-1.51859	1.0816	-0.323591	0.18252	1.0816	23
MFAP1	-1.37732	1.49162	-0.724493	-0.623354	-0.00311636	1.49162	0.0406045	0.441442	-0.736992	25
MRPL19	-0.348282	1.10229	0.723009	0.472141	-0.0172421	1.10229	-0.223791	-1.99822	-0.812198	17
THOC2	-0.412457	0.373453	-0.657377	-0.722485	-0.566589	1.7677	0.100982	1.33774	-1.22097	19
DRG2	0.825672	1.02545	-0.736076	-1.0404	-1.42126	0.982114	-0.810144	0.192532	0.982114	21
GNL1	0.379164	0.630216	1.20699	-0.755429	-0.774351	1.20699	-0.72889	0.458221	-1.62292	2
INF2	0.525695	1.17788	0.0179318	0.298546	0.581774	1.10609	-1.25988	-0.999128	-1.44891	2
RBM14	-0.915595	-0.913363	0.328414	-0.136683	-0.697729	1.40043	0.725358	1.37045	-1.16129	16
CTNNA3	-0.43562	-0.538114	-0.705725	-0.798979	-0.570529	1.72575	-0.304422	-0.0981178	1.72575	23
STAT5A	0.520294	0.567996	-0.748058	-0.831891	1.3281	1.3281	-0.560191	-0.08574	-1.51861	24
AP3B1	-0.0731821	-1.17888	0.0157276	0.163949	1.0986	1.96341	-0.36309	-0.638318	-0.988221	10
CDH4	-1.20321	1.50602	-0.291848	-0.426827	-0.70209	1.50602	-0.658367	-0.491674	0.761978	25
FUBP3	0.4574	0.333266	-0.735211	-1.71209	-0.569542	1.51551	0.307988	1.04124	-0.638553	19
RPRD1A	0.178611	-0.118225	-0.368746	-1.3169	-1.22774	1.65092	0.85861	0.897967	-0.554495	19
LEPREL2	0.387515	0.949981	-0.606824	-0.736515	-0.169363	1.53579	0.037732	0.456323	-1.85464	12
FGA	-0.117742	-0.752019	-0.701344	-0.527891	1.6963	1.6963	-0.0822196	-0.883836	-0.327541	24
CDH11	-1.08531	-1.67269	-0.111518	0.00257314	-0.325217	1.78177	0.510315	0.631436	0.268645	16
TRMT10C	-1.46529	1.45699	-0.483354	-1.06517	-0.039128	1.45699	0.31717	0.15695	-0.33516	25
PIGG	-1.45237	0.973634	-0.59961	-0.805877	-0.27019	1.62121	-0.526313	0.973634	0.0858801	25
CAMK2G	-0.246569	-0.762755	-0.811588	-0.0278166	-0.266624	2.15771	-0.436688	1.11986	-0.725526	22
PLBD2	-0.0402467	-0.0875302	-0.54314	-0.541152	0.75361	1.80111	-0.939062	-1.34802	0.944426	2
SLC7A14	-0.905032	-1.45913	-0.0470656	-0.426257	-0.0112278	1.68381	0.0925204	-0.314996	1.38738	10
KLC1	0.758775	0.915854	0.286574	-0.429518	0.975205	0.950155	-1.67223	-0.697592	-1.08722	2
NEK7	0.808458	1.02891	-0.731808	-0.557391	-0.721359	1.5045	0.0668027	0.216314	-1.61443	12
UBA7	0.966173	1.30397	-0.557253	-0.730922	-0.968226	0.646945	-0.939826	-0.919479	1.19862	21
CYP51A1	-1.39819	1.08448	0.316731	0.00725835	-0.363241	1.08448	-0.0852072	-1.59682	0.950501	17
VWA8	-0.82482	-1.7252	0.121634	0.119145	0.400701	1.85649	-0.200039	0.689719	-0.437625	16
SLC12A4	-0.562452	-0.526127	-0.0610142	-0.00596237	0.182636	2.25103	-0.0618037	-1.49106	0.274752	10
PPFIBP2	0.518374	0.725645	-0.929983	-1.20225	-1.30412	1.24464	-0.308715	0.0117704	1.24464	23
VRK1	-0.831472	-0.143363	-0.249398	-0.3323	-0.892467	1.77135	0.712041	1.13903	-1.17342	19
GAA	0.689646	0.629954	0.0391529	0.221659	1.5364	0.433144	-0.885653	-1.64447	-1.01983	2
NUMA1	0.548041	0.28551	0.0794073	-0.866835	-1.72614	-0.798038	0.723088	1.64599	0.108973	19
WBP4	-0.791387	-0.763865	1.36349	-0.588482	-0.537654	1.36349	0.282308	0.909167	-1.23707	16
SRGAP3	-0.495913	-0.692865	-2.02465	0.244783	0.230703	0.189646	0.59701	1.59431	0.356978	8
GPR107	-0.962188	-1.52938	0.000788895	-0.295805	0.362242	1.92365	-0.174825	-0.190118	0.865644	10
SYNM	-0.434504	-0.501521	-0.416931	-1.22132	-0.317444	1.95955	-0.308765	1.35814	-0.117205	22
APP	-0.572335	1.41311	-0.151492	-0.704143	-0.258931	1.41311	-0.591143	-1.41276	0.864582	25
DNAJB4	-0.462824	0.532563	-2.19713	0.214921	0.0310963	1.49146	0.502285	-0.325045	0.212675	8
HACL1	0.597133	-0.923184	0.850889	1.03012	-1.04121	1.55195	-0.48127	-0.907344	-0.677082	2
NT5C2	1.12758	1.31253	-0.10371	-0.997625	-0.790222	1.36267	-0.294584	-0.558368	-1.05827	11
CUL1	0.871189	1.19316	-0.590691	-0.823622	-1.00051	1.02618	-1.19359	-0.508302	1.02618	21
ANO10	-0.44225	-1.71707	-0.313191	-0.108026	0.570005	1.77544	0.568187	-0.833982	0.500882	10
MBD3	-0.264388	-0.424598	-0.781585	1.42676	-1.17506	1.42676	-0.236933	0.917382	-0.888344	2
FBXO44	0.531503	1.05015	-0.67625	-0.366721	-1.4046	1.17723	-1.03616	-0.452381	1.17723	23
PXMP4	-0.779689	1.35869	0.504439	0.296392	0.0579548	1.35869	-0.229034	-1.33837	-1.22907	25
MRPL1	-0.288835	1.2657	0.734296	0.892336	-0.990356	0.98716	-1.30984	-1.13284	-0.157624	2
SQRDL	-1.45637	1.57426	0.173256	-0.353875	-0.015895	1.57426	-0.404981	-0.609211	-0.48144	25
NUP54	-0.0866869	0.299667	-0.746043	-1.64617	-1.06907	1.1814	0.0491322	0.836376	1.1814	23
NUP98	-0.58632	-0.137027	-0.889103	-0.866828	1.3581	1.3581	0.238092	0.820127	-1.29514	24
NUP133	0.152291	0.557258	-0.612842	-1.4819	-0.597009	1.86859	0.164614	0.75496	-0.805965	22
ACAD11	-1.72906	1.31832	-0.750984	-0.68205	-0.269853	1.31832	0.0942438	0.648699	0.0523555	25
MATN1	0.191798	0.72871	-0.810137	1.13324	-1.73125	-0.228984	-0.940072	0.523458	1.13324	8
XRN2	-0.15483	-0.901253	0.363727	0.463999	0.345733	1.23581	-0.0616532	-2.11743	0.825901	10
SMARCA5	-0.510731	-1.10785	-0.34282	-0.718961	-0.559067	2.05242	0.421461	1.04676	-0.281212	22
CSDE1	0.306659	0.538418	0.930884	-1.20533	0.930884	0.900273	-1.02182	0.210959	-1.59093	2
EFTUD1	0.785903	1.21794	-0.935704	-0.525662	-1.25517	1.04715	-0.800839	-0.580757	1.04715	21
HEPH	-1.52473	-0.842178	0.196794	-0.0136319	-0.17713	1.96219	0.0416667	-0.521494	0.878513	10
PCSK5	-0.785214	-1.39524	-0.43455	-0.461449	0.298108	1.80955	-0.259764	-0.037437	1.266	10
ECHDC1	0.152045	0.0491337	0.111087	0.129346	0.197852	1.46208	-1.67947	-1.40663	0.98456	2
IGF2BP1	0.345769	-0.391772	0.381342	0.452591	-0.242503	1.76274	-0.579292	0.226561	-1.95544	2
SPTB	0.672999	1.2925	0.0222453	-0.408911	0.459542	-0.195112	0.0742528	0.385784	-2.3033	18
B3GALTL	0.389495	0.193468	0.0821155	0.15926	-0.520377	1.26467	-1.80093	1.26467	-1.03237	2
ACP6	0.435214	1.43805	-0.0296403	-0.263775	-0.906643	1.66699	-1.14442	-0.750577	-0.445208	2
NBEA	-0.313531	-1.28197	0.688739	0.0138163	-1.15336	1.43443	-0.415208	1.43443	-0.407344	16
EEA1	-0.0994485	-0.621969	-0.232399	-0.973354	-1.31288	1.72242	0.117628	1.37735	0.0226455	22
HAGH	0.876383	0.996774	-0.477344	-0.281505	-1.34214	1.06664	1.06664	-0.812843	-1.09261	21
ABHD6	-0.975455	-1.50834	-0.0741792	0.297194	0.446234	1.94053	0.114565	-0.700236	0.459686	10
LRBA	0.737612	1.3366	-0.896765	-0.909287	-1.22365	1.53253	-0.147015	-0.0170025	-0.413011	12
MRPS34	-0.906567	1.25008	0.559649	0.499842	0.245251	1.25008	-0.61246	-1.61295	-0.672917	17
PIP4K2A	0.836345	1.09492	-0.395162	-1.385	-0.672087	1.42114	0.444551	-0.195799	-1.14891	12
USP10	0.401084	0.970315	-1.01849	-1.15261	-1.14344	1.23693	-0.373839	-0.156882	1.23693	23
PALLD	0.493766	0.293034	-1.6469	-1.16216	1.27732	1.27732	-0.565891	-0.0917717	0.12528	24
TBCD	0.773675	1.07676	-0.943662	1.06465	-1.01409	1.06465	-0.584033	-0.135343	-1.30261	2
GRPEL1	0.178081	-0.761947	0.253559	0.349851	-0.0844788	1.33277	-1.6607	-0.939908	1.33277	2
RANGAP1	0.402758	0.91456	-1.41884	-0.795207	1.10651	1.10651	-0.188336	0.222015	-1.34997	24
CYP1B1	-1.30566	1.50565	-0.0912529	-0.723201	-0.255547	1.50565	0.319625	0.0729078	-1.02817	25
INSR	-1.54273	1.54917	-0.450167	-0.477947	-0.251809	0.0329994	-0.551492	1.54917	0.142792	8
TGM2	-0.864611	1.42607	-0.220812	-0.515378	-1.3353	1.42607	0.109385	0.720565	-0.746	25
PPM1H	0.416852	1.1722	-0.412468	-0.512307	-1.47766	1.7764	-0.817854	-0.0961935	-0.0489676	12
MBOAT2	-0.982612	1.35626	-0.395246	-0.542477	0.14644	1.35626	-0.143307	-1.52612	0.730808	25
MYL4	0.000904741	-1.31661	-0.352063	-1.02609	0.217364	1.55185	1.55185	-0.434712	-0.192481	8
RAB12	0.580741	1.12942	-0.384028	-0.522144	-0.769406	1.88144	-0.156752	-0.51688	-1.24238	12
COL2A1	1.13626	1.33809	-0.311458	-0.529904	-1.35814	-0.274015	-0.404861	1.29185	-0.887822	18
MTX3	-1.74922	1.09435	0.485006	0.487919	-0.08239	1.09435	-0.879051	-0.997017	0.546049	17
IST1	0.606708	0.317575	-0.657551	1.87359	-0.468278	-0.0461936	-1.24785	0.743298	-1.1213	2
FRYL	-0.780322	1.22948	-0.473905	-0.660264	-0.897198	1.22948	0.433946	1.12359	-1.20481	19
ZC3H18	-1.55402	1.46018	-0.0872486	-0.0568283	-0.248641	1.46018	-0.851498	0.446662	-0.568798	25
RAB27A	-0.246572	-0.959604	0.47612	0.373136	0.290228	1.98095	-0.0103435	-1.59674	-0.307169	10
DTNA	1.55969	-1.19448	-0.714606	-0.402019	-0.331902	1.55969	-0.69227	-0.351938	0.567842	22
CARS	0.945726	1.09737	-0.757024	-0.927021	1.05292	1.05292	-0.590902	-0.666278	-1.20771	21
TCERG1	0.752951	1.1716	-0.57341	-0.671118	-1.36872	1.34554	-0.139505	0.591063	-1.1084	12
NMT2	0.985666	1.29822	-0.915109	-0.634181	-1.12632	1.36381	-0.463352	0.307249	-0.815973	12
PRPF4	0.236119	0.396289	-1.1773	-0.831617	-0.68083	1.49881	0.738241	1.01433	-1.19405	19
MLLT4	-0.135635	0.304323	-1.01894	-1.10763	-1.08998	2.00657	0.193573	0.503653	0.344066	22
TLN2	0.841722	1.06863	-0.825702	-1.09887	-1.28539	1.42058	-0.101765	0.528651	-0.547851	12
CSGALNACT2	-0.906967	-1.08061	-1.00657	-0.600054	0.174849	1.4219	-0.157543	1.4219	0.733101	16
CTDSP1	0.428364	-0.334289	0.381648	0.563119	-1.13287	2.08163	-0.946384	-0.826974	-0.214239	2
NCOR1	0.169697	0.187295	0.0274703	0.00676937	-0.00246876	1.76895	-0.505524	-2.08818	0.435992	17
SLC1A4	-0.704454	-1.8435	0.266445	0.00853755	0.582666	1.75353	0.575386	-0.113344	-0.525264	10
ROR2	-0.877192	-0.91511	0.238824	0.425679	-0.950319	2.24469	0.312726	-0.224221	-0.255076	10
SIRT3	-0.57637	-1.66473	0.297843	0.219452	1.08161	1.69932	0.11482	-0.6186	-0.553343	10
MAVS	0.981318	0.571633	-0.560441	-0.380393	-1.41615	1.64385	-1.06922	0.547258	-0.317857	12
ITIH2	1.08009	-0.908554	-1.01175	-1.10322	1.08009	1.52287	-0.0178342	-0.514815	-0.12688	24
SRP54	0.744222	1.36769	-0.952597	-0.55519	-0.810715	1.5455	-0.176112	-0.0305077	-1.13229	12
IPO9	0.442288	0.887784	-0.703952	-0.783739	1.35609	1.35609	-0.690819	-0.846703	-1.01703	24
SYN3	0.646204	1.1384	-0.644329	-0.782027	-1.0291	1.56547	0.0640311	0.322679	-1.28133	12
CAD	0.617932	0.974765	-0.329392	-0.519562	-1.30161	1.51647	0.0567218	0.434946	-1.45027	12
PTK2	0.827996	1.25995	-0.71671	-1.01904	-1.08663	1.60021	-0.233132	-0.0172248	-0.615426	12
MAN1A2	0.250584	1.36669	-0.455707	-0.721746	-0.594318	1.36669	-0.531229	-1.4819	0.800941	25
AMIGO3	-0.817237	1.57099	-0.505789	0.102392	-0.908974	1.57099	-0.597534	-0.863338	0.448494	25
RBM5	-0.685431	-1.28522	-0.596127	-0.289205	-0.299939	2.11348	0.426005	0.813771	-0.197329	16
PODXL2	-0.646015	-1.75104	-0.533839	-0.262242	-0.023515	1.41262	-0.0218073	1.41262	0.413213	16
AAK1	0.590598	0.673044	-1.09336	-1.11163	1.25372	1.25372	-0.4723	0.0864097	-1.1802	24
LPHN3	1.57773	-0.26576	0.136507	-0.0578472	-1.11589	1.57773	-0.956003	-0.877149	-0.0193262	2
MRPL38	-0.22001	-1.24261	0.543739	0.379742	0.00268792	1.32646	1.32646	-1.38143	-0.735043	10
STAG2	0.204355	0.165167	-0.58246	-1.09496	-0.856518	1.97652	-0.0670105	1.05361	-0.798703	22
NOL9	-0.641736	-0.78954	-0.848099	-0.344721	-0.609129	2.03434	0.571858	1.05295	-0.425921	22
CACNA2D1	-0.405437	0.0258611	-0.207649	-0.376195	-0.847944	1.55157	-1.44658	1.55157	0.15481	22
ATP2C2	-0.758425	-0.860558	0.428821	0.475936	0.225366	1.7532	-0.289234	-1.62559	0.650487	10
RPA1	0.449391	0.718703	1.15854	-0.499662	-1.12558	1.15854	-0.357906	0.204069	-1.7061	2
PRPF6	-1.15062	-0.336851	-0.770923	-0.834698	-0.704287	1.38365	0.0589425	0.971131	1.38365	23
MAP1B	0.547969	1.09557	-0.812264	-1.18199	-1.03203	1.80807	-0.263742	0.0327801	-0.194357	12
MIA3	-1.23507	1.58471	-0.0786279	0.164397	0.18242	1.05597	-0.621778	-1.48564	0.433617	17
TARS2	0.0994827	-1.34686	-0.387728	0.236535	-0.0592381	1.52932	-0.861032	-0.739795	1.52932	10
MPZL1	0.0631248	-0.131143	-1.10101	1.20362	-1.70117	1.20362	0.922656	-0.13422	-0.32547	8
SNX27	0.667968	0.980827	-0.587318	-0.940647	-1.49915	1.72647	0.0586178	-0.0488726	-0.357897	12
SLC5A3	-0.799579	1.6524	-0.382416	-0.772986	-0.439515	1.6524	-0.499647	-0.766111	0.355464	25
RPL22L1	-0.0410944	0.309896	-1.00582	1.481	-1.18043	1.481	-0.408606	0.290821	-0.926773	2
GLS	-0.462236	-0.496774	0.467589	0.784549	0.535201	1.94345	-0.725922	-1.1283	-0.917559	5
MCCC1	-0.271933	-0.278183	0.448661	0.642537	-0.95836	1.35106	-1.30843	1.35106	-0.97641	2
DHX30	-0.97667	-1.58031	-0.106982	0.209119	-0.0816585	1.6412	0.728436	0.873628	-0.70676	16
SKIV2L	0.0223148	0.0350751	-1.04555	-1.27011	-1.16765	1.31195	0.114222	0.687785	1.31195	23
AGO3	-0.0816993	0.505003	0.125786	-0.32897	-1.62055	1.93193	0.076644	0.425627	-1.03378	22
KIAA1468	-0.026304	0.403261	-0.758532	-1.35585	-0.509894	2.23043	-0.195381	0.358593	-0.146324	22
WDR26	-0.433778	0.406998	-0.324737	-0.978751	-1.10482	2.01568	0.105936	0.943759	-0.630289	22
CYP27A1	-1.14759	1.32551	0.0737678	0.29661	0.133813	1.32551	-0.371323	-1.70729	0.0709793	17
DNAJA1	1.5727	0.52253	-0.940516	-0.856232	-0.683715	1.5727	-0.422425	-0.0479086	-0.717134	22
ACOX3	-0.707519	1.6066	-0.806675	-1.03639	-0.543009	1.6066	-0.399326	0.383629	-0.1039	25
SNX4	0.671327	0.539274	-0.856159	-1.7414	-0.729652	1.18682	-0.363605	0.106576	1.18682	23
YME1L1	-0.975321	1.24835	-0.0301497	0.0873848	-0.0665976	0.492241	1.24835	-1.91542	-0.0888417	17
MANEA	-0.498512	-0.899036	-0.0662482	-0.146701	0.0546157	1.76342	0.19158	-1.55756	1.15844	10
GALNT6	-0.96514	1.39305	-0.0869476	-0.355161	0.254532	1.39305	-0.480197	-1.59966	0.446467	25
NOVEL	-0.0500731	0.123238	0.105985	-0.112922	0.7759	2.04628	-1.41902	-0.539898	-0.929492	2
ATRX	-1.84658	1.44317	-0.0910299	-0.379909	-0.310763	1.44317	-0.192879	0.228322	-0.293501	25
RAP2C	-0.937683	-1.00228	-0.534676	0.000668105	-0.45851	1.62606	-0.534548	1.62606	0.214905	16
CDK11B	-1.29557	1.50727	-0.197437	-0.311976	-0.175143	1.50727	-0.237471	0.387916	-1.18486	25
SOX9	0.161806	-1.19839	-1.33538	-0.593092	-0.215053	1.46927	0.0510141	0.190564	1.46927	8
BCHE	-0.835811	-0.69161	-0.299914	-0.245094	-0.503945	1.73493	-0.450389	1.73493	-0.443089	16
BRE	0.173914	0.615093	-0.791357	-0.826704	-1.15782	1.4781	-0.710274	-0.259058	1.4781	23
RRAGC	0.286579	0.306739	-1.28607	-0.577219	-0.164708	1.49123	-0.487422	-1.06036	1.49123	23
ANK1	-0.0859814	-1.10688	0.659426	0.744159	-0.12415	1.95877	-0.821281	-1.1135	-0.110568	5
PLAA	0.634411	0.962681	-0.883742	-1.18016	1.20254	1.20254	-0.598868	-0.251893	-1.08751	24
DDX46	-0.785085	1.31252	-0.263284	-0.322965	-0.656428	1.31252	0.309941	0.735109	-1.64233	25
TUBGCP3	0.481525	0.574462	-0.471546	-0.0732621	-0.334263	1.02798	0.292687	0.806018	-2.3036	19
ATL2	-0.886515	-0.905591	0.325429	-0.394877	-0.32223	2.09414	0.235989	-0.961007	0.814657	10
ESRP2	-0.30787	-0.602568	-0.524491	-0.806904	1.48445	1.48445	-1.26664	0.748753	-0.209171	24
FND3C2	-1.13164	1.61524	-0.266435	-0.0993852	-0.96078	1.61524	-0.702717	-0.0106765	-0.0588517	25
MAP1A	-0.0827999	0.246391	-0.967094	-1.10203	-0.664603	1.6708	0.912255	0.920131	-0.933044	19
NBAS	-0.520027	-0.616318	-0.134314	-0.566703	-0.484622	2.42522	0.489416	0.192971	-0.785624	22
DSCR3	0.87458	0.961054	-1.14364	-1.01617	-0.291072	1.6184	0.169496	-0.0615688	-1.11108	12
SLC35A3	-1.04477	-1.00586	-0.525365	-0.536343	0.17653	1.60801	-0.353666	1.60801	0.0734579	16
FBXL20	-1.60376	1.53365	-0.117706	0.038264	-0.137259	1.53365	-0.719348	-0.392237	-0.135258	25
MGRN1	-1.07492	1.67883	-0.43503	-0.589133	-0.153352	1.67883	-0.338948	-0.729044	-0.0372347	25
ATP11A	-1.45088	1.41232	-0.0220645	-0.0658281	-0.147822	1.41232	-0.36366	-1.23776	0.463371	25
CALD1	0.570396	0.788312	-1.28038	-0.927354	1.319	1.319	-0.659176	-0.592848	-0.536957	24
OSBP2	-0.188165	0.565572	-0.877962	-1.01324	-0.809135	2.1633	0.30268	-0.524748	0.381694	22
BRD4	-1.2476	1.59552	-0.398825	-0.598502	-0.706928	1.59552	-0.212377	0.367142	-0.393954	25
PPP6R2	0.595077	0.7975	-0.339772	-0.418462	-1.64096	1.80471	-0.0749678	0.1397	-0.862823	12
AQR	-1.01449	1.44356	-0.261678	-0.318717	-0.656199	1.44356	0.180381	0.55007	-1.36649	25
OSBPL1A	0.627389	0.702703	-0.420976	-1.03086	1.25376	1.25376	-1.48916	-0.214505	-0.682103	24
C2CD5	-1.34712	1.43352	0.0836314	-0.101125	-0.0699595	1.43352	-0.0423228	-1.43167	0.0415195	25
CLCN6	-1.57138	1.53454	-0.431365	-0.324652	-0.348471	1.53454	-0.551315	-0.135199	0.29331	25
ABCC3	-0.407595	-0.346167	-0.276492	-0.619552	-0.877428	2.52791	0.247009	-0.154375	-0.0933051	22
MARCKSL1	0.636154	0.751735	-0.117356	-0.410674	-1.30956	1.19396	-1.41823	1.19396	-0.519979	2
SNX5	0.985124	1.19666	-0.616349	-0.594789	-0.780629	1.60311	-0.612481	-0.0369478	-1.1437	12
TRRAP	-0.490915	-1.18196	-0.12824	-1.17367	-0.563696	1.35919	0.630905	1.55076	-0.00236829	16
KIF13B	0.469309	0.786108	-0.851766	-0.624408	-1.21564	1.34372	-0.921239	-0.329801	1.34372	23
NONE	-0.684011	0.749844	-0.439851	-0.185398	0.720446	2.1166	-0.846039	-0.750957	-0.680635	22
WARS2	-0.490869	-1.05113	-0.648108	-0.458688	0.228493	1.60713	1.60713	-0.892255	0.0982915	8
ABCA2	-0.44981	1.66848	-0.316087	-0.482421	-0.287409	1.66848	-0.32763	-1.29432	-0.179293	25
KIAA0196	-0.0767058	-0.689465	-0.216934	-0.494763	-0.662897	2.18856	0.0766284	0.933791	-1.05822	22
FBLN1	-0.633926	1.38217	-1.02396	-0.708171	0.727126	1.38217	-0.353654	0.412802	-1.18455	25
WNK2	0.786683	1.19819	-0.724143	-0.833747	-0.733195	1.73165	-0.46257	0.0246411	-0.987512	12
EPB41L4B	0.411981	0.354715	-0.989279	-0.652642	1.52425	1.52425	-0.780634	-0.503907	-0.888735	24
COL15A1	-0.606847	1.46653	-0.466236	-0.571071	-0.933135	1.51274	-0.151258	0.803095	-1.05382	25
CGNL1	1.65676	-0.106535	-0.819013	-0.762913	0.162707	1.65676	-0.916459	-0.427801	-0.443517	22
TAOK1	-0.222685	-0.481696	-0.513969	-0.608789	-0.192308	2.60223	-0.13386	-0.504015	0.0550866	22
COL5A1	-0.543744	-0.689911	-0.277507	-0.611636	-0.968303	2.11349	-0.314497	1.11462	0.177483	22
UHRF2	-0.955728	-1.29131	1.30445	-0.337663	0.526298	1.30445	0.585787	-1.13215	-0.00412699	10
HECTD4	-0.944859	-1.43228	1.35986	0.289687	0.293164	1.35986	-0.243542	-1.01018	0.328292	10
UTRN	0.00812637	0.155498	-0.382477	-0.600618	-1.41205	2.16767	-0.128425	0.704859	-0.512585	22
DNAH12	-0.184011	-0.349831	1.35251	-1.83867	-0.639103	1.35251	0.421692	0.267706	-0.382802	8
WDR11	0.755137	1.1698	-0.617162	-0.285214	-0.785664	1.67032	-0.38186	-0.0983328	-1.42702	12
EXTL3	-1.1731	0.291363	-0.941723	-0.63052	-0.224557	1.58324	-0.433379	1.58324	-0.0545666	22
NLRX1	-1.6902	1.47019	0.237042	0.10365	-0.446709	1.47019	-0.243628	-0.661252	-0.239279	25
MYO5A	-0.198045	-0.298954	-0.0373164	-0.320014	-0.832685	2.30483	0.0908254	0.512473	-1.22111	22
RAB34	-0.898389	-1.26489	-0.268144	-0.211323	-0.117736	2.18363	0.518184	0.489793	-0.431132	16
CLASP2	0.242295	0.419256	-0.65753	-1.04674	-0.706441	2.04745	0.244309	0.547092	-1.08969	22
ATP11B	-0.72879	1.69728	-0.88583	-0.455279	-0.453432	1.69728	-0.379906	-0.595496	0.10418	25
LAMA5	-1.55295	1.26248	-0.185227	-0.287191	-1.01953	1.26248	0.535073	0.684524	-0.699655	25
KIF21A	0.0717189	0.175096	-0.868335	-0.818533	-0.883436	2.37629	0.0685811	0.163941	-0.285323	22
BRD3	-0.00520655	-1.08119	-0.129351	-0.0990018	-0.728489	2.41567	-0.27657	0.37471	-0.47057	22
SIN3A	1.44581	-0.110956	-0.590512	-0.345503	-0.991667	1.44581	-0.0403236	0.599575	-1.41223	22
NUP107	-0.0334114	1.93863	-0.896157	-1.04555	-1.11062	0.487368	0.520347	0.614149	-0.474764	19
SLK	-0.359335	0.597515	-0.86033	-0.763048	1.55827	1.55827	-0.394193	-0.290674	-1.04648	24
PCYT2	0.892094	0.640464	-0.773213	-1.10853	-0.308172	1.24903	-0.749997	-1.09071	1.24903	23
USP4	0.214708	0.581455	-0.67263	-0.991321	-1.39546	1.41048	-0.501298	-0.0564084	1.41048	23
TAPT1	-1.50966	1.49922	-0.0618498	-0.255332	-0.37212	1.49922	0.0225985	-0.994013	0.171939	25
TMEM214	-0.805655	-0.0386568	0.322979	-0.0422831	-0.596646	2.3839	-0.233585	0.0792933	-1.06935	22
SEC16A	0.0427014	0.511862	-0.320485	-0.471698	-0.644414	2.46807	-0.584905	-0.325837	-0.675298	22
UBE4A	-1.14331	1.64845	0.163753	-0.204922	-0.364271	1.64845	-0.556224	-0.731678	-0.460253	25
PHKA1	-0.600642	-2.04722	0.201875	-0.31608	-0.470332	0.650857	1.13167	1.13167	0.318206	1
TTC17	-1.0235	1.69913	-0.576884	-0.351113	-0.358986	1.69913	-0.477091	-0.604772	-0.00591709	25
MYLK	0.42714	0.573248	-0.336512	-0.421472	-0.502108	2.30733	-0.487416	-1.0695	-0.490705	22
PBRM1	0.136689	-0.981909	-0.528059	-0.529998	-0.824594	2.06782	0.374628	0.955276	-0.669851	22
HIP1	0.043704	-0.247663	-0.967802	1.54656	-1.08463	1.54656	-0.0692002	0.22477	-0.992308	2
PPL	0.812909	0.857254	-0.697382	-0.708278	-1.27737	1.92352	-0.377062	-0.275951	-0.257633	12
HDHD3	-0.461337	0.0397947	-0.401533	-0.574482	-0.573852	1.68317	-1.10117	-0.293771	1.68317	23
VRK3	0.133507	0.649347	-1.19938	-0.942272	-0.694958	1.87106	0.425609	0.599535	-0.842446	22
OSBPL11	0.341514	0.517314	-0.715556	-1.08235	-0.782512	2.19372	0.0645617	0.155525	-0.69221	22
MFN1	-0.621704	1.54992	0.0944298	0.201486	-0.668403	1.54992	-0.990009	-1.15374	0.0380927	25
GCN1L1	0.680912	0.910421	-0.384894	-0.577822	-0.927609	1.64172	-0.115047	0.36159	-1.58927	12
RALBP1	1.66448	-0.06077	-0.879225	-0.602529	-1.03176	1.66448	-0.410551	-0.288101	-0.056032	22
LLGL1	0.395856	0.534147	-0.684565	-0.945005	1.47491	1.47491	-0.862021	-0.430555	-0.957677	24
PRPF3	-0.318379	-0.194022	-1.03608	-0.751183	1.54759	1.54759	-0.163553	0.460794	-1.09275	24
PDS5A	0.179654	0.202112	-0.373904	-0.317543	-1.17649	1.97301	0.325909	0.586809	-1.39956	22
MAP2K4	0.400233	0.621166	-0.865768	-1.12447	1.38754	1.38754	-0.460081	-0.187452	-1.15871	24
CUL3	0.0904762	0.426657	-0.781324	-0.790921	-0.998921	1.56981	-0.713144	-0.372447	1.56981	23
IK	1.47821	-0.381589	-1.10365	-0.594909	-0.669124	1.68388	0.0637088	0.351876	-0.828403	22
PARP3	-0.159364	-0.361928	-0.486789	-0.697058	-0.0456093	2.42075	-0.937667	0.548332	-0.280663	22
PI4KA	-0.43476	0.36657	-0.672473	-0.150535	1.1632	1.96926	-0.679045	-0.400758	-1.16146	2
GPR98	1.52076	1.52076	-1.12016	-0.986185	-0.853196	0.41225	-0.306157	-0.356668	0.168604	21
EXOC1	0.639071	0.955935	-0.416648	-1.02584	-0.207486	1.81148	-1.39118	-0.432864	0.0675353	12
KIAA1033	-0.130905	-0.324662	0.500306	-0.472677	-0.263015	2.1644	0.621639	-0.862064	-1.23302	22
VWF	1.14897	1.14897	0.09464	-0.714386	-0.640904	1.49581	-1.03288	-0.747957	-0.752273	2
RSF1	-1.41933	1.59292	-0.0250699	-0.223112	-0.553986	1.59292	-0.716596	-0.0559549	-0.191787	25
PTPN23	0.850186	1.14462	-0.362339	-0.653909	-1.15204	1.65124	-0.241956	-0.102044	-1.13375	12
VAC14	0.61084	0.482532	-0.567975	-0.540153	-0.67216	2.23159	-0.275107	-0.151919	-1.11764	22
DPP4	-0.641422	-0.88296	-0.26404	-0.443215	-0.71423	1.63914	-0.715686	1.63914	0.383268	16
RECK	-0.622746	-0.450341	-0.806081	-0.0138593	-0.96822	2.22754	-0.416466	0.26511	0.785067	22
CHST14	-0.780797	1.68309	-0.46402	-0.588793	-0.32253	1.68309	-0.321746	-0.973629	0.0853337	25
NUP214	-0.0412512	0.0117453	-0.758558	-1.17407	1.57314	1.57314	-0.565136	0.23078	-0.849792	24
MYO1E	-1.16489	-0.878358	-0.22154	-0.559454	0.00978366	2.16882	0.414172	0.666762	-0.435294	22
TRAPPC11	-0.552314	-0.260713	-0.458241	-0.679957	-0.70116	2.4152	-0.310972	0.711632	-0.163473	22
ANKMY2	0.725605	1.05475	-0.446149	-0.557045	-1.13313	1.90916	-0.779196	-0.47671	-0.297284	12
ARMC6	0.384624	0.583221	-0.774505	-0.748191	-0.906018	1.47031	-0.977478	-0.502281	1.47031	23
RYR2	-0.200778	-0.238122	1.72819	-0.756481	-0.715077	1.72819	-0.539243	-0.347407	-0.659271	2
HIP1R	1.00939	0.924795	-0.662593	-1.1266	-0.623	1.79885	-0.64372	-0.0647004	-0.612422	12
FAM171A1	-1.15295	1.65506	-0.556663	-0.249566	-0.622903	1.65506	-0.267585	-0.58693	0.126468	25
PRPF4B	-0.846736	1.55335	-0.516416	-0.254482	-0.656588	1.55335	-0.117594	0.486769	-1.20164	25
NOLC1	0.69727	1.37089	-0.228466	0.237444	-1.02755	1.37089	-0.98294	-0.17506	-1.26248	2
SYNE2	-0.684444	-1.49085	0.0944346	0.0871999	-0.207762	2.242	-0.0734882	-0.312732	0.345643	10
C7ORF26	-0.675871	-0.47737	-0.663083	-0.841676	-0.748973	1.62819	-0.307413	0.458015	1.62819	23
CSTF3	0.433517	-0.451421	-0.675694	-0.640008	-0.581146	2.45634	0.149578	-0.111545	-0.57962	22
COL12A1	1.45948	-0.720498	-0.443095	-0.859982	-1.12785	1.45948	0.418442	0.547491	-0.733461	22
AKAP13	0.146887	-0.144743	-0.896616	-0.958402	1.65399	1.65399	-0.662742	-0.323848	-0.468527	24
DHX29	0.734405	0.581632	-0.391276	-0.806184	-1.08846	1.85772	-0.177255	0.481249	-1.19182	12
EPHB2	1.5889	-0.551345	-0.891239	-0.809915	-0.996535	1.5889	0.317817	-0.313108	0.066527	22
MTOR	0.445376	0.561424	-0.547704	-0.444599	-1.25679	2.14595	0.0112469	-0.0184146	-0.896491	22
MFSD10	1.24705	1.24705	-0.516721	-0.654642	-0.810098	1.40489	-0.717257	-1.00599	-0.194271	21
Q5ZIN3	-0.455157	-0.0208699	-0.842811	-0.567013	-1.19678	1.62897	-0.141671	-0.0336283	1.62897	23
LPCAT2	-1.03926	-0.786071	-0.0787728	-0.0208664	0.083607	2.20751	0.546146	-1.04812	0.135825	10
UBR4	0.507068	0.75491	-0.264926	-0.44139	-0.685531	2.15548	-0.514592	-0.316456	-1.19456	22
TRAPPC12	-0.11549	1.6937	-0.47445	-1.10328	-0.523268	1.6937	-0.249725	-0.307969	-0.613228	25
INPP5B	0.239317	0.630377	-0.626391	-1.10964	-0.977682	1.47445	-0.613383	-0.491505	1.47445	23
ARHGEF37	0.415039	0.548833	-0.774075	-0.869011	-1.16766	1.45618	-0.523355	-0.542129	1.45618	23
CNOT1	0.865169	1.21012	-0.190994	-0.435734	-1.4925	0.523697	0.293025	0.77	-1.54278	19
EDC4	-0.411055	0.463443	-0.514475	-0.814328	1.5967	1.5967	-1.09039	-0.585019	-0.241574	24
RFTN2	-0.803715	-0.461432	-0.378932	1.61321	-0.712159	1.61321	-0.327203	-0.989468	0.446484	8
PTPRG	-0.146332	-0.918225	-0.496453	-0.55652	-0.013587	1.68647	-0.86551	1.68647	-0.376314	22
GRAMD1B	0.685539	0.00735345	-1.01971	0.356087	-0.461921	2.1152	-0.942023	-0.877382	0.136855	2
DNAJC16	-0.634293	1.58657	-0.621492	-0.436573	-0.604654	0.650454	-0.890733	1.58657	-0.63585	8
FLII	0.108156	0.454379	-0.316655	-0.74757	-1.201	2.33073	-0.17981	0.0158873	-0.464118	22
DOCK7	-0.310716	0.324494	-0.461622	-0.42415	-1.21835	2.29095	-0.0315178	0.488616	-0.657704	22
COG3	-0.13105	0.44956	-0.874356	-1.13652	-0.624102	1.11838	-0.648238	-0.0666816	1.91301	23
GNPAT	-1.08246	1.69152	-0.238087	-0.357116	-0.153453	1.69152	-0.266074	-0.659947	-0.625892	25
DST	-0.216245	-0.309851	-0.143009	-0.642069	-0.0584406	2.54806	-0.240412	-0.933089	-0.00494973	22
SKIV2L2	-0.413953	-0.494709	-0.751193	-0.909341	1.70609	1.70609	-0.229652	-0.0512996	-0.562027	24
CCDC93	-0.0566253	0.230976	1.64945	-0.596405	-0.615819	1.64945	-0.676814	-0.627454	-0.956754	2
RHPN2	0.286285	0.601521	1.46867	-0.916579	-0.99423	1.46867	-0.598404	-0.349974	-0.965953	2
NUP188	-0.253783	0.211618	-0.995409	-0.727714	-1.31472	1.51604	-0.124425	0.172352	1.51604	23
SUPT6H	-0.773067	-0.518495	-0.569394	-0.742474	-0.616724	1.70176	-0.27729	0.0939177	1.70176	23
[truncated: 43 more rows]

## Sheet: Sorted
Protein	S1	S2	P2	S3	M3	S6	P6	P7	S7	cluster		1	2	3	4	5	6	7	8	9
COCH	-0.80701	-1.12941	-0.189019	-0.626572	-0.196708	0.145839	1.48909	1.77593	-0.462136	1
INA	-0.666336	-1.41631	-0.374139	-0.733237	0.497436	-0.423325	0.931441	1.86433	0.320141	1
NEFM	-0.670268	-1.34026	-0.455056	-0.617672	0.128086	-0.217858	0.753662	2.10615	0.313223	1
SRSF3	-0.420458	-1.58563	0.119986	-0.0170594	0.30611	-1.16818	1.1099	1.61317	0.0421645	1
HMGB1	-0.951935	-0.723312	-0.485789	-0.508368	0.615384	-1.00439	1.21693	1.7903	0.0511751	1
LMNB2	-0.674493	-1.45494	-0.00803691	-0.250546	0.573052	-1.30395	0.790675	1.18882	1.13941	1
HNRNPF	-0.079937	-0.864494	-0.36189	-0.498028	-0.0721498	-0.269297	0.981262	2.18673	-1.02219	1
SRSF1	-0.358996	-1.75829	0.0938299	-0.249399	0.430662	-1.07085	0.682231	1.57511	0.655706	1
MYO6	-0.900111	-1.34231	-0.371296	-0.675763	-0.364726	0.142637	1.17242	1.68424	0.65491	1
MYH10	-0.825598	-1.73348	0.211814	0.269977	0.13985	-0.999424	0.899868	1.40114	0.635857	1
HEATR5A	-1.40076	-0.391134	-0.299144	0.0651288	-0.733471	-0.413628	1.20153	1.90635	0.0651288	1
TNMD	-0.979695	-0.999906	-0.00220422	-0.576619	1.1679	-1.13882	0.861011	1.51018	0.158154	1
HNRNPU	-0.662718	-0.810761	-0.0283725	-0.198235	-0.217456	-0.825193	1.41682	1.93747	-0.611548	1
HP1BP3	-0.793357	-1.75036	0.0832008	-0.00605787	-0.177816	0.128142	0.797998	1.89325	-0.174997	1
KRTX	-0.749509	-1.0894	-0.393305	-0.666825	1.39269	0.353847	0.792302	1.38316	-1.02295	1
SRSF10	-0.738775	-1.05772	-0.312373	-0.180806	0.39323	-1.05772	0.943117	2.01055	0.000487429	1
FAM120A	-0.536117	-0.947191	0.211234	-0.0544311	0.264503	-1.74386	1.08388	1.56789	0.154091	1
RBM4B	-0.276897	-1.47041	0.170094	0.133534	0.602331	-1.48313	0.587853	1.67407	0.0625588	1
NHP2	-0.16168	-0.787743	0.464732	0.351605	-0.150347	-0.0645945	0.490672	1.76389	-1.90653	1
FBLN5	-0.952022	-1.30028	-0.197391	-0.449101	0.365163	-0.205916	1.43669	1.66969	-0.366832	1
MMEL1	-0.504001	-0.831014	-0.171427	-0.804873	-0.0809212	-1.01008	1.76132	1.49233	0.148668	1
TMPO	-1.00139	-1.65247	0.0113654	-0.278522	0.36989	-0.680132	1.01307	1.33602	0.882166	1
EIF4A3	-1.37598	-0.729321	-0.0211968	0.201172	0.56826	0.783135	0.657932	1.40043	-1.48444	1
LAMC1	-0.580423	-1.48398	0.302453	0.122221	-0.938755	-0.423224	0.68572	1.91364	0.402348	1
PARP1	-0.468664	-1.54328	0.398457	0.36752	0.54846	-1.54741	0.886473	1.27124	0.0872109	1
TRA2A	-1.07743	-1.23285	0.546388	0.664818	0.531584	-1.41721	0.664818	1.35801	-0.0381211	1
EFTUD2	-0.789592	-1.5848	0.128164	0.0122245	0.128164	-0.442278	0.969479	1.89621	-0.317573	1
GAL1	-1.36841	-0.888273	0.277393	-0.16133	0.439763	-1.36841	1.01747	1.14704	0.904746	1
LAMB1	-0.648299	-1.29338	0.256631	0.13347	-1.12098	-0.389566	0.83124	1.9014	0.329489	1
COL1A2	-0.428277	-1.16997	0.0336224	-0.334106	-0.548111	0.431163	0.715334	2.14876	-0.848409	1
NID1	-0.980951	-0.293191	0.294633	-0.0113742	-1.29466	-0.836356	0.789052	1.92323	0.409625	1
STRBP	-0.380789	-1.24719	0.63407	0.639441	0.479405	-1.56431	0.858299	1.2668	-0.685732	1
LMNB1	-0.362425	-0.889762	0.228115	0.0616007	0.470048	-2.08754	0.478686	1.10325	0.998027	1
HMGB2	-0.870895	0.303771	-0.32209	-0.688901	0.0789219	-1.35942	0.920214	1.967	-0.0285996	1
LRPPRC	-0.347132	-1.80219	0.656299	0.591202	0.881931	-0.975031	0.570877	1.13589	-0.711844	1
ANP32B	-0.2303	-0.542516	-0.357622	-0.380314	0.565964	-1.09078	0.804091	2.10992	-0.878443	1
NOP58	-0.819104	-1.06804	0.631355	0.379139	0.449946	-1.31232	0.95688	1.50908	-0.726933	1
MATN4	-0.941372	-1.85462	0.227123	-0.151734	-0.0626	-0.151097	1.06519	1.52254	0.346573	1
SF3B3	-0.411678	-0.28021	-0.127159	-0.150721	-0.159449	-0.90726	1.3946	1.85614	-1.21426	1
CDC5L	-0.727739	-1.32506	-0.0857302	-0.132109	-0.340561	0.0553071	0.130317	2.35561	0.0699744	1
RBM39	-0.512093	-1.47586	0.336628	0.176402	0.108037	-0.464742	0.933167	1.848	-0.949534	1
NOP56	-0.941999	-1.9176	0.477026	0.449294	-0.0749918	-0.337885	0.860398	1.46476	0.0209997	1
C7ORF55-LUC7L2	-0.459827	-1.61076	0.530812	0.478293	-0.370077	-0.106239	0.216904	2.00503	-0.684134	1
COLEC12	-0.369539	-1.73798	0.319213	0.18963	-0.0563985	-1.29077	0.746959	1.27304	0.925842	1
COL14A1	-0.493439	-2.05715	0.357022	0.227447	-0.184152	-0.442707	1.06387	1.40278	0.126325	1
RCC2	-0.568067	-0.503678	-0.273939	-0.397219	-0.567076	0.330602	1.40219	1.80965	-1.23246	1
ANXA1	-0.936752	-1.29397	0.16163	0.169743	-0.301372	-0.849707	1.29795	1.70089	0.0515768	1
ZNF326	-0.411751	-1.50019	-0.172336	-0.330131	-0.105479	-0.454972	1.02155	2.04244	-0.0891302	1
DKC1	-0.760325	-0.244515	0.409881	0.304199	-0.177247	-0.244515	0.969454	1.60899	-1.86592	1
SNRNP200	-0.463159	-1.08999	0.155604	-0.0531879	-0.0331612	-1.13147	1.23125	1.87848	-0.494366	1
SF3B1	0.0862665	-0.577517	0.42244	-0.35742	-0.0682699	-1.03815	1.16213	1.7427	-1.37218	1
GLRK	-0.820228	-1.88258	0.607721	-0.355014	0.244081	0.439538	1.33091	0.982252	-0.546674	1
GLYR1	-0.369965	-1.16668	-0.0481272	-0.29194	-0.0601206	-0.808411	1.0921	2.09112	-0.437979	1
POF1B	-0.192126	-1.74032	0.699499	0.693137	-0.0396217	0.226639	0.856562	0.983249	-1.48701	1
MYO7A	-0.842105	-1.64714	-0.186245	-0.553359	0.229782	-0.370162	1.26787	1.39108	0.710285	1
SRSF11	-0.670339	-0.0671154	0.597381	0.0891746	-0.596466	-0.0204086	0.308417	2.00525	-1.6459	1
CORO2B	-0.836895	-0.496023	-0.416838	-1.11459	0.340878	-0.888578	1.39279	1.62329	0.395966	1
MYO1C	-0.00847969	-1.30554	0.790168	0.354666	-0.321646	-0.87591	1.22708	1.32665	-1.18699	1
COL9A3	-0.551945	-1.26247	-0.168375	-0.560606	-0.762061	0.765167	0.708733	2.0142	-0.18265	1
TOP2B	-0.573323	-1.94317	0.286252	-0.00903166	0.30936	-0.737588	1.09812	1.39144	0.177947	1
NUP155	-0.00313707	-0.435096	-0.0761042	-0.302953	-0.0561755	-1.63173	1.51583	1.55775	-0.568397	1
SNRNP200	-0.780308	-0.948229	0.239073	0.194842	0.214151	-0.469747	0.988802	1.86106	-1.29964	1
MAPT	-0.0904256	-0.738094	0.64245	0.0950604	0.0546944	0.0546944	0.777536	1.34818	-2.14409	1
COL6A1	-0.494068	-1.67197	0.0755499	-0.353885	-0.792256	0.742891	1.10518	1.54998	-0.16143	1
LAMA2	-0.884684	-0.385415	0.30799	-0.143836	-1.13799	-0.631149	1.21175	1.92898	-0.265644	1
LRWD1	-0.892512	-1.51478	0.296526	-0.0838822	-0.35025	0.523354	0.8365	1.82041	-0.635364	1
COL6A3	-0.439185	-1.81212	0.388102	0.0265419	-0.673076	-0.243168	1.21023	1.54763	-0.00495044	1
LAMB2	-0.760714	-1.33904	-0.112555	-0.184304	-1.09617	0.796245	1.01675	1.64656	0.0332268	1
COL18A1	-1.02272	-0.959779	-0.0576343	-0.182346	-0.940134	0.679612	1.0933	1.81056	-0.42086	1
PKP2	-0.288778	-1.21707	0.237603	0.280551	0.0639846	0.539248	0.783895	1.42986	-1.8293	1
MYO1D	-0.750123	-0.637592	0.405779	0.0567831	0.134323	-1.91379	1.17026	1.33093	0.203438	1
COL8A2	-0.422855	-1.42891	-0.0316871	-0.879171	0.114412	0.615586	1.47303	1.34915	-0.789553	1
NCBP1	-1.08306	-1.61593	0.512154	0.0640541	0.219451	0.710374	0.443976	1.58258	-0.833593	1
EMILIN3	-0.536946	-2.07621	0.0218534	-0.0464444	-0.32666	0.750897	0.925443	1.36579	-0.0777256	1
TJP1	-0.769116	-0.995313	-0.143288	-0.274642	-0.0863018	-1.37373	1.20982	1.16667	1.2659	1
STAU1	-1.16902	-1.25334	0.23963	-0.337775	-0.282181	0.668723	1.16774	1.60867	-0.642451	1
STX16	-0.723923	-0.430983	0.469162	-0.999946	0.823856	0.960945	0.536259	1.09274	-1.72811	1
FGG	-0.515626	-0.992871	-0.542594	-1.31433	0.676875	0.676875	0.911019	1.63993	-0.539284	1
TAF15	-0.394879	-0.666585	-0.190743	-0.396921	-0.599409	0.917413	0.972236	1.75983	-1.40094	1
U2SURP	0.25645	-1.34457	0.0395326	0.11622	-0.149349	1.21273	0.772097	0.892753	-1.79587	1
PHKA1	-0.600642	-2.04722	0.201875	-0.31608	-0.470332	0.650857	1.13167	1.13167	0.318206	1
Average	-0.629431	-1.17769	0.113899	-0.139292	-0.0149941	-0.407106	0.966076	1.61881	-0.330273
	±	±	±	±	±	±	±	±	±		Slope =	0.183711
SD	0.32657	0.515962	0.325965	0.408779	0.524919	0.802182	0.303624	0.321465	0.790092
SERPINH1	0.379593	0.573514	0.438222	0.381282	1.57732	0.00409592	-1.02454	-0.479646	-1.84984	2
HSPA5	0.157158	-0.40103	0.406154	0.355902	-0.231184	1.51669	-1.51744	-1.33171	1.04546	2
HSP90B1	0.766281	0.890482	0.0270237	0.138579	0.268583	1.40942	-1.19268	-1.6314	-0.676288	2
PDIA6	1.09237	1.16929	0.0809244	0.0176105	-0.249974	0.566907	-0.473714	-0.0069759	-2.19643	2
P4HB	0.65153	0.805379	0.228141	0.312612	-0.463623	1.70809	-1.23291	-1.23485	-0.774374	2
RPSA	0.712015	0.984055	-0.116881	0.193188	-0.420828	1.7513	-1.14957	-0.962674	-0.990606	2
RPLP1	0.607373	-1.32554	1.16791	0.000661844	0.866023	0.493317	-1.78827	0.388344	-0.409818	2
HSPD1	0.0903102	-0.266709	0.448508	0.488946	1.03309	1.56268	-1.36223	-1.24867	-0.745927	2
RPL38	0.860722	0.975569	0.276915	0.128541	-0.860545	0.674271	-0.155794	0.313167	-2.21285	2
RHOA	0.469337	0.911248	-0.385021	0.235253	0.0534681	1.83808	-1.04079	-1.2802	-0.801371	2
RPL9	0.926709	1.08656	-0.196848	0.311668	-0.134701	0.682596	-2.23297	0.136505	-0.579519	2
RPLP0	0.915264	1.24173	-0.202	0.307736	-0.12129	1.07233	-0.755328	-0.625989	-1.83246	2
ACAT1	0.387207	-0.318266	0.708829	0.620197	0.929026	1.17478	-1.74929	-0.983235	-0.76924	2
RPS12	0.476561	0.253752	0.0959709	-0.00806154	0.169808	1.38945	-2.32062	-0.448487	0.391627	2
RPL3	0.605651	0.791452	0.367687	0.607567	-1.40396	0.310791	0.0972589	0.630489	-2.00694	2
HSD17B10	0.399929	0.0810549	0.59602	0.552348	0.36162	1.46505	-1.48799	-0.373552	-1.59447	2
IDH3A	0.432148	0.461567	0.305103	0.44944	1.2042	0.962277	-1.42926	-1.0495	-1.33597	2
HADH	0.48029	0.413312	0.6112	0.509002	0.192558	1.50279	-1.33821	-1.3711	-0.999838	2
ETFA	0.413702	-0.21215	0.461322	0.544234	1.45064	0.589145	-1.9965	-0.791971	-0.458428	2
ALDH6A1	0.266754	0.394268	0.586026	0.42301	0.935547	1.20687	-1.05685	-1.32498	-1.43064	2
RPS2	0.337257	0.202988	0.794008	1.14784	-1.78293	0.149179	-1.2428	0.929904	-0.535455	2
RPS15	0.852381	1.15863	0.288035	-0.0593285	-1.93178	0.777317	-1.15831	0.323037	-0.249982	2
DPH2	0.40759	1.2291	0.317232	0.606675	-0.0922559	1.03551	-1.25142	-0.547014	-1.70541	2
COPE	0.681049	0.76409	-0.283683	-0.536236	0.0583156	1.44133	-2.02479	-0.496535	0.396462	2
DECR1	0.559218	0.693799	0.318388	0.223076	1.208	0.636756	-0.963171	-0.754219	-1.92185	2
RPS10	0.619556	1.20317	0.317071	0.268641	-0.73104	1.45523	-1.18266	-0.826908	-1.12306	2
LGALS3	0.135096	0.240079	0.724865	0.445099	0.95882	1.21515	-1.42985	-1.40904	-0.880216	2
EIF3F	0.389318	-0.101494	0.0964574	-0.104843	0.915932	1.60106	-1.63199	-1.31508	0.150635	2
ACADSB	0.190949	-0.588983	0.327604	0.476387	0.78197	1.80232	-1.28044	-0.454095	-1.25571	2
ARL8B	-0.590165	0.651477	0.205726	-0.404341	1.59695	1.10595	-0.635828	-1.66552	-0.264249	2
NHP2L1	-0.281983	-0.281615	-0.225947	-0.545108	0.792718	1.63384	-1.52853	1.1573	-0.720677	2
PYCR1	-0.148119	-0.534359	0.512992	0.370926	1.52795	1.28728	-0.904768	-0.701443	-1.41046	2
TIMM13	0.832714	0.258816	0.0355238	-0.407159	0.373534	0.847265	-1.82933	-1.25204	1.14067	2
PRKACB	0.535109	0.971259	-0.0469636	-0.348169	-0.00226017	1.42474	-0.32148	-0.0895852	-2.12265	2
DNAJC3	0.594794	0.169234	0.212539	1.05458	0.525958	0.614666	-1.66678	-1.72594	0.220944	2
RCN2	0.633054	0.571155	0.470143	0.43436	-0.749944	1.50914	-1.44231	-1.3936	-0.0320091	2
CST3	0.80642	1.14236	0.31051	0.302823	-1.47178	0.997996	-1.56323	-0.500159	-0.0249385	2
GLB1	1.06058	1.32004	0.293697	0.259397	-1.0088	0.756839	-1.56074	-0.157783	-0.963235	2
CAT	0.210899	0.188084	-0.201339	0.241841	-0.744721	1.78418	-0.142863	0.59097	-1.92706	2
SUMF1	0.469469	1.17548	-0.019484	0.489419	-1.13457	1.60907	-0.696313	-0.897203	-0.995866	2
EIF3H	-0.0640907	0.00542053	0.0522977	-0.371548	0.327946	1.37227	-2.14895	-0.259263	1.08592	2
CKMT1A	0.445416	0.32695	0.290907	0.258146	-0.95265	2.07282	-0.942587	-1.15408	-0.344923	2
TIMM8A	0.687421	0.0858602	0.321006	0.165619	-0.195459	0.0228295	-1.96291	-0.810082	1.68571	2
PES1	0.128619	1.43115	-0.35015	-0.243908	1.62599	0.0100316	-0.827315	-0.235098	-1.53932	2
FKBP9	0.801173	1.53216	0.0197377	-0.0678688	-0.302011	1.11232	-0.961506	-0.579342	-1.55467	2
MESDC2	1.0923	0.730229	0.601802	0.353707	-0.923984	0.0601903	-2.20709	0.0601903	0.232656	2
ALDH4A1	0.404043	0.503193	0.5077	0.761289	0.721774	0.922403	-1.16912	-1.82211	-0.829177	2
EIF3I	1.27731	-0.189789	0.157951	0.316842	0.238932	0.320262	-2.10781	-0.902545	0.888847	2
PDP1	0.580933	0.073535	0.800295	0.859363	0.00811061	1.3282	-1.02556	-1.21978	-1.4051	2
CHID1	0.795299	0.580197	0.923553	0.920481	-0.746106	0.261122	-1.77222	0.261122	-1.22344	2
NME3	0.685599	-0.335042	0.815056	0.616076	-0.667729	1.61911	-0.842733	-1.5814	-0.308932	2
LYPLA1	0.455265	1.15823	0.236735	-0.244852	0.945204	0.497839	-1.59758	0.165996	-1.61684	2
ME3	0.365152	0.596555	0.683288	0.628746	-0.631787	1.5943	-0.87136	-0.906741	-1.45815	2
RAB8B	0.251028	0.60677	0.36356	-0.366825	-0.0514479	1.98727	-0.241166	-1.12817	-1.42101	2
UVRAG	1.20524	-1.1995	-0.217488	0.900857	0.241892	0.65713	-1.92429	0.16808	0.16808	2
DCAF7	0.0556902	1.64769	-0.637969	-0.240504	0.457576	0.457576	-1.96526	0.617977	-0.392776	2
HIBCH	0.798629	0.686791	0.724832	0.770672	-1.43096	0.493515	0.493515	-1.17294	-1.36405	2
SAFB2	0.151386	-1.22706	0.184036	0.22519	-0.752752	1.46461	-0.8913	1.54609	-0.700204	2
TBRG4	0.543033	0.250185	0.67043	0.304093	0.943335	0.878996	-1.83236	-0.361294	-1.39642	2
HSPH1	0.768157	0.460548	0.216673	-0.414061	0.880031	1.4222	-1.65731	-0.962145	-0.71409	2
LRRC57	0.770977	0.935367	0.234444	0.183486	0.120079	1.00243	-0.49478	-0.541973	-2.21003	2
CCDC108	0.388	1.13261	0.0782459	0.124192	-0.879669	1.0113	-2.16784	0.156584	0.156584	2
CSK	0.177229	1.27356	-0.259611	-0.275221	1.36406	0.521383	-1.33487	-1.51229	0.0457597	2
ACP2	0.757822	0.764092	0.35745	0.98869	-0.688801	-0.466037	-0.894173	0.98869	-1.80773	2
CARKD	0.0414674	1.23415	-0.78924	-0.228307	0.889842	1.38899	-1.19477	-0.0583177	-1.28381	2
C3H6ORF203	-0.527397	0.808811	0.205317	0.688942	-0.3587	1.89635	-1.22776	-1.07082	-0.414745	2
PDPR	0.445206	0.169094	0.891874	0.840794	0.72063	0.764805	-1.36856	-0.872492	-1.59135	2
GOLGA2	0.487072	-0.327622	0.343221	0.0522896	0.297316	1.52503	-1.97896	-0.949231	0.550881	2
ACAD8	0.301316	-0.364247	0.912056	1.3396	0.180978	0.974311	-1.5049	-0.59381	-1.2453	2
NAPG	0.122152	0.204734	-0.579121	-0.488605	0.360542	1.948	-1.83161	0.297386	-0.033474	2
IFT122	-0.580727	-0.0861019	0.493216	0.565343	1.34521	1.36202	-0.680405	-1.0676	-1.35095	2
ACOT9	0.535858	0.241285	0.0844048	0.357273	0.377404	1.70681	-1.84187	-0.776785	-0.684382	2
ECHDC3	0.389015	-0.0308455	0.346197	0.58114	1.33343	1.01549	-1.54457	-1.12054	-0.969312	2
ENTPD5	0.302099	0.132358	0.634391	0.556956	-1.19297	1.00555	-1.833	1.00555	-0.61094	2
GBF1	0.565151	1.58061	0.429905	0.266167	-0.308908	0.918969	-1.23592	-1.15228	-1.06369	2
ERO1LB	0.430049	0.663506	0.201134	0.49413	-1.33607	1.0108	-0.920604	1.0108	-1.55375	2
SUGT1	1.26506	1.16723	0.80184	-0.809584	-0.947903	0.80184	-0.919637	-0.216604	-1.14224	2
ARMC1	-0.594416	0.989445	1.25211	0.576349	-0.579365	0.989445	-0.239473	-0.682323	-1.71177	2
TSPAN6	0.273196	0.462985	-0.378478	0.243346	-0.155424	2.00153	-0.466147	-1.79635	-0.184662	2
USP9X	1.16654	1.19029	0.0561834	0.557669	-1.04069	0.867034	-0.879249	-0.478566	-1.43922	2
YES1	0.77154	0.48513	0.343967	0.260697	-0.55241	1.63838	-1.03966	-1.69316	-0.214488	2
UBE2O	0.548452	0.53804	0.0600894	-0.463501	-0.717021	2.03426	-1.04407	-1.18228	0.226033	2
SAP18	-1.10305	0.581359	0.127898	0.300425	-2.4706e-05	2.05301	-1.34648	-0.058737	-0.5544	2
ABHD11	0.347456	0.239601	-0.123237	0.349336	0.895907	0.872983	-1.69748	0.75087	-1.63543	2
BCL2L13	0.88677	0.170469	0.185802	0.750709	-0.472198	1.39099	-0.95519	-1.87329	-0.0840625	2
SORBS1	-0.0607332	0.514053	-0.160111	0.925465	-0.0545827	1.87829	-1.04099	-1.34169	-0.659695	2
SDCBP	-0.0280056	0.191616	-0.48285	-0.0684697	0.33008	1.63004	-0.908646	-1.73059	1.06682	2
PLIN2	0.475437	0.304873	-0.835102	0.0409393	0.251022	1.51975	-0.448265	-1.987	0.678345	2
HMGCL	0.390809	-0.0986938	0.656243	0.753385	0.689593	1.13757	-1.90556	-1.05752	-0.565817	2
VPS45	0.682357	1.07935	-0.0363432	-1.06785	-0.0295311	1.47187	-0.442525	-1.69218	0.0348556	2
PMPCB	0.42785	-0.70124	0.222039	0.517692	-0.4722	1.44383	-1.98566	0.824966	-0.277277	2
ABHD10	0.433454	-0.0384425	0.670577	0.836934	0.237468	1.20981	-1.69239	-1.50056	-0.156855	2
CASK	0.0951415	-0.721354	0.446277	0.739887	-0.853831	2.12621	-0.394521	-1.09633	-0.341476	2
WDR61	1.0745	0.531205	-0.677658	-0.623984	-0.365622	1.51444	-1.56063	-0.596562	0.704316	2
ADCK3	0.309535	-0.765172	0.126269	0.471518	1.03041	1.75548	-1.03832	-1.13635	-0.753379	2
IRF6	0.816378	1.24693	-0.472344	0.905262	-1.03446	0.905262	-0.613075	-0.194166	-1.55978	2
NONE	0.370875	0.605258	0.497395	0.312992	-0.601835	0.874219	0.874219	-0.77431	-2.15881	2
SSBP1	0.0513304	-0.680431	0.0673945	0.0852582	0.0491665	2.31961	-0.874454	-1.16347	0.145597	2
TIMM44	-0.233085	-0.961702	0.439118	0.217243	1.61379	1.43344	-0.798116	-0.959049	-0.751637	2
POLDIP2	0.178443	-0.503304	0.202513	1.0559	0.226247	1.78488	-1.51003	-0.796821	-0.637832	2
CEP41	0.659518	1.11123	-0.666716	1.01784	-1.23971	1.01784	-0.763075	0.155501	-1.29242	2
LDHD	0.556893	0.678764	0.191464	-0.27994	0.203115	1.58723	-1.63995	-1.36373	0.0661464	2
ECHDC2	0.831405	0.786859	-1.48663	1.09138	-1.2056	1.09138	-0.75799	-0.113093	-0.237715	2
PPP6C	0.742927	1.02717	-1.1064	1.04321	-1.20737	1.04321	-1.19499	-0.0220431	-0.325709	2
LAMC3	0.349439	0.0286629	0.441816	0.493491	-0.893972	1.69254	-1.03428	0.491682	-1.56938	2
STXBP3	0.625917	0.0283843	0.39486	-8.27207e-05	-0.35953	2.14431	-0.859626	-0.852132	-1.1221	2
GNL1	0.379164	0.630216	1.20699	-0.755429	-0.774351	1.20699	-0.72889	0.458221	-1.62292	2
INF2	0.525695	1.17788	0.0179318	0.298546	0.581774	1.10609	-1.25988	-0.999128	-1.44891	2
PLBD2	-0.0402467	-0.0875302	-0.54314	-0.541152	0.75361	1.80111	-0.939062	-1.34802	0.944426	2
KLC1	0.758775	0.915854	0.286574	-0.429518	0.975205	0.950155	-1.67223	-0.697592	-1.08722	2
GAA	0.689646	0.629954	0.0391529	0.221659	1.5364	0.433144	-0.885653	-1.64447	-1.01983	2
HACL1	0.597133	-0.923184	0.850889	1.03012	-1.04121	1.55195	-0.48127	-0.907344	-0.677082	2
MBD3	-0.264388	-0.424598	-0.781585	1.42676	-1.17506	1.42676	-0.236933	0.917382	-0.888344	2
MRPL1	-0.288835	1.2657	0.734296	0.892336	-0.990356	0.98716	-1.30984	-1.13284	-0.157624	2
CSDE1	0.306659	0.538418	0.930884	-1.20533	0.930884	0.900273	-1.02182	0.210959	-1.59093	2
ECHDC1	0.152045	0.0491337	0.111087	0.129346	0.197852	1.46208	-1.67947	-1.40663	0.98456	2
IGF2BP1	0.345769	-0.391772	0.381342	0.452591	-0.242503	1.76274	-0.579292	0.226561	-1.95544	2
B3GALTL	0.389495	0.193468	0.0821155	0.15926	-0.520377	1.26467	-1.80093	1.26467	-1.03237	2
ACP6	0.435214	1.43805	-0.0296403	-0.263775	-0.906643	1.66699	-1.14442	-0.750577	-0.445208	2
TBCD	0.773675	1.07676	-0.943662	1.06465	-1.01409	1.06465	-0.584033	-0.135343	-1.30261	2
GRPEL1	0.178081	-0.761947	0.253559	0.349851	-0.0844788	1.33277	-1.6607	-0.939908	1.33277	2
IST1	0.606708	0.317575	-0.657551	1.87359	-0.468278	-0.0461936	-1.24785	0.743298	-1.1213	2
CTDSP1	0.428364	-0.334289	0.381648	0.563119	-1.13287	2.08163	-0.946384	-0.826974	-0.214239	2
LPHN3	1.57773	-0.26576	0.136507	-0.0578472	-1.11589	1.57773	-0.956003	-0.877149	-0.0193262	2
RPA1	0.449391	0.718703	1.15854	-0.499662	-1.12558	1.15854	-0.357906	0.204069	-1.7061	2
RPL22L1	-0.0410944	0.309896	-1.00582	1.481	-1.18043	1.481	-0.408606	0.290821	-0.926773	2
MCCC1	-0.271933	-0.278183	0.448661	0.642537	-0.95836	1.35106	-1.30843	1.35106	-0.97641	2
NOVEL	-0.0500731	0.123238	0.105985	-0.112922	0.7759	2.04628	-1.41902	-0.539898	-0.929492	2
MARCKSL1	0.636154	0.751735	-0.117356	-0.410674	-1.30956	1.19396	-1.41823	1.19396	-0.519979	2
HIP1	0.043704	-0.247663	-0.967802	1.54656	-1.08463	1.54656	-0.0692002	0.22477	-0.992308	2
PI4KA	-0.43476	0.36657	-0.672473	-0.150535	1.1632	1.96926	-0.679045	-0.400758	-1.16146	2
VWF	1.14897	1.14897	0.09464	-0.714386	-0.640904	1.49581	-1.03288	-0.747957	-0.752273	2
RYR2	-0.200778	-0.238122	1.72819	-0.756481	-0.715077	1.72819	-0.539243	-0.347407	-0.659271	2
NOLC1	0.69727	1.37089	-0.228466	0.237444	-1.02755	1.37089	-0.98294	-0.17506	-1.26248	2
GRAMD1B	0.685539	0.00735345	-1.01971	0.356087	-0.461921	2.1152	-0.942023	-0.877382	0.136855	2
CCDC93	-0.0566253	0.230976	1.64945	-0.596405	-0.615819	1.64945	-0.676814	-0.627454	-0.956754	2
RHPN2	0.286285	0.601521	1.46867	-0.916579	-0.99423	1.46867	-0.598404	-0.349974	-0.965953	2
SPAG9	0.344676	0.493254	-0.904663	1.44349	-0.274845	1.44349	-0.724968	-1.35411	-0.466317	2
KIAA0513	-0.251986	0.0411763	1.68244	-0.848752	-0.739656	1.68244	-0.635883	-0.173757	-0.756028	2
Average	0.419182	0.386939	0.191885	0.275334	-0.126311	1.2497	-1.13366	-0.534108	-0.712539
	±	±	±	±	±	±	±	±	±		Slope =	-0.149446
SD	0.41994	0.647024	0.564225	0.568033	0.857776	0.537663	0.571881	0.800816	0.827468
H2A-VII	-0.448593	-2.51615	0.373118	0.345691	0.501679	0.100302	0.652362	0.61847	0.373118	3
H4-I	-0.300308	-2.44497	0.447445	0.491015	0.679731	-0.228557	0.71023	0.685778	-0.0403612	3
H2B-I	-0.532849	-2.46175	0.325723	0.373989	0.552336	-0.0723501	0.571975	0.622583	0.620344	3
H3-IX	-0.736179	-2.28086	0.225542	-0.0261812	0.160082	1.13492	0.262786	0.512103	0.74779	3
HIST1H1B	-0.760173	-2.07186	0.38321	0.246632	0.349395	-0.619573	0.931876	1.19509	0.345401	3
CKAP4	-0.7514	-1.95313	0.379563	0.38564	0.461172	-0.354743	0.195897	-0.0790298	1.71603	3
ANXA2	-1.23464	-2.03054	0.620699	0.485502	0.226679	-0.137924	0.607435	0.397995	1.0648	3
HADHA	-0.662466	-2.26622	0.416419	0.430242	0.675228	1.15099	0.164802	-0.311478	0.402478	3
HADHB	-0.733441	-2.1273	0.312559	0.319867	0.775288	1.32635	0.0966628	-0.413126	0.443135	3
SRSF7	-0.602414	-2.30401	0.43334	0.374282	0.374879	-0.392978	0.749767	1.00691	0.360228	3
RPN1	-0.669704	-2.04727	0.506583	0.549377	0.644604	-0.0805991	0.447015	-0.667132	1.31713	3
H2BFM	-0.71687	-2.27694	0.425197	0.411918	0.527611	-0.412967	0.584057	0.950645	0.507351	3
DDOST	-0.683622	-2.16486	0.276443	0.30441	0.502012	0.572787	0.242575	-0.415525	1.36578	3
H2AFY2	-0.761549	-2.33535	0.254928	0.281614	0.500672	-0.0647378	0.531694	0.885611	0.707119	3
CANX	-0.375637	-1.914	0.487797	0.306089	0.607475	-0.078327	0.131497	-0.831988	1.66709	3
SSR1	-0.626409	-2.2694	0.153394	0.0445817	0.706225	0.761523	0.666602	-0.330679	0.894165	3
SRSF6	-0.372265	-2.27444	0.366093	0.472359	0.414211	-0.690835	0.640031	1.06074	0.384111	3
H2AFY	-0.532521	-2.24417	0.62379	0.40918	0.445889	-0.714099	0.499033	0.653031	0.859863	3
H1F0	-0.619771	-1.91458	0.468871	0.927694	0.13422	-0.932601	0.564942	0.0844667	1.28676	3
ERH	-0.859748	-2.10909	0.340533	0.18537	0.751794	-0.154654	-0.0522762	0.582248	1.31582	3
GBAS	-1.12962	-2.07261	0.406424	-0.247041	1.11037	0.404405	0.375709	0.561021	0.591339	3
SRI	-0.804267	-2.23724	0.374635	0.209346	1.0139	-0.275536	0.538238	0.781321	0.399596	3
ATP2A2	-0.764911	-2.00492	0.0905601	0.0640907	0.586812	0.499354	0.716763	-0.580181	1.39243	3
CSNK2A1	-0.655632	-1.88576	0.0602887	0.0726988	0.855058	-1.00518	0.778382	1.08151	0.698627	3
SLC1A6	-0.491729	-2.07632	0.234571	0.192859	0.423251	1.21721	0.292018	-0.786772	0.994917	3
SRSF2	-0.795323	-1.97647	0.590431	0.683053	0.5068	-0.983555	0.66673	0.900383	0.40795	3
FAAH	-0.655327	-1.93755	0.35613	0.330359	0.603599	1.16372	0.380354	-1.03937	0.798089	3
PDCD6	-0.622842	-2.35072	0.439823	0.182717	0.660348	-0.290772	0.769137	0.684655	0.527655	3
OTOF	-0.955246	-1.84812	0.0725316	-0.102001	0.585181	-0.200359	0.764107	0.0444309	1.63948	3
STT3A	-0.790289	-2.0938	0.479854	0.423926	0.635383	1.26566	0.545325	-0.52449	0.0584285	3
ITGB1	-0.670071	-2.12451	0.0712688	0.145902	0.445727	1.1328	0.0195331	-0.234626	1.21398	3
ATP2B2	-0.746651	-1.98849	0.286571	0.284979	0.568794	0.259193	0.665612	-0.729637	1.39963	3
ADPGK	-0.586775	-2.26039	0.321021	0.384855	0.557846	-0.0320974	0.437851	-0.152011	1.3297	3
PTPLAD1	-0.283923	-1.96542	0.200379	-0.0701529	0.765905	0.148568	-0.0418745	-0.522192	1.76871	3
HMOX2	-1.15819	-1.92181	0.243435	0.339239	0.74039	0.727507	0.171028	-0.381897	1.2403	3
LRP2	-0.852511	-2.27221	0.403423	0.319635	0.34899	0.475659	0.123724	0.265131	1.18816	3
LEMD2	-0.498048	-2.3784	0.282157	0.208818	0.469154	-0.309843	0.707247	0.791685	0.727232	3
CHP1	-0.439466	-2.09007	0.212762	0.28215	0.519225	0.680015	0.349297	-0.838956	1.32504	3
DPM1	-0.679356	-2.11504	0.807007	0.477548	0.728361	-0.11888	1.00694	-0.610743	0.504169	3
SEC61A1	-1.0116	-1.90985	0.426689	0.5866	0.550704	1.48067	0.35334	-0.0526123	-0.423941	3
NOMO1	-0.658459	-1.97082	0.357573	0.467858	0.580074	0.65625	0.388305	-1.0062	1.18541	3
LMF2	-0.409281	-2.07176	0.422627	0.370812	0.660339	-1.0233	1.02466	0.225851	0.800043	3
TFAM	-0.199328	-2.53549	0.361041	0.581564	0.457983	0.698709	0.139588	-0.0856301	0.581564	3
EMC3	-0.518902	-2.09712	0.381265	0.508038	0.544343	-0.645962	0.817731	-0.214565	1.22517	3
ATP5S	-0.918082	-2.09366	0.483614	0.212818	1.03472	-0.489594	0.509918	0.885139	0.375128	3
NONE	-0.761106	-2.23545	0.198439	-0.0535097	0.296432	0.983818	0.597883	-0.0103249	0.983818	3
POR	-0.713891	-2.15275	0.272726	0.0856876	0.527361	0.826905	0.414993	-0.457311	1.19628	3
SLC1A3	-0.630512	-2.0115	0.473526	0.469055	0.886634	0.859959	0.427533	-1.04077	0.566074	3
MRC2	-0.375069	-2.0031	0.194806	-0.128003	0.217452	-0.386551	-0.033181	0.790145	1.7235	3
LRP1	-1.00629	-1.96524	-0.0175431	-0.11637	0.455828	0.20625	0.158463	0.806617	1.47828	3
EMC1	-0.483284	-2.0356	0.491093	0.448995	0.639033	0.756005	0.458157	-1.12527	0.850866	3
PIGK	-0.81165	-2.06328	0.294742	0.117393	0.807226	-0.0131072	0.476176	-0.238588	1.43108	3
NCSTN	-0.283941	-2.25247	0.522553	0.239562	0.534194	-0.0831043	0.428409	-0.457916	1.35271	3
FMO3	-0.293696	-2.49848	0.378736	0.383623	0.371205	0.682008	0.459557	-0.206727	0.723779	3
SACM1L	-0.589708	-2.21871	0.167569	0.159907	0.596192	1.38758	0.366606	-0.289799	0.420362	3
DNAJA3	-0.737532	-2.37467	0.450925	0.469467	0.842109	-0.0212559	0.434118	0.300515	0.63632	3
CCDC47	-0.143613	-2.32533	0.510121	0.408069	0.556517	-0.0707335	0.673487	-0.610654	1.00214	3
DERL1	-0.857114	-1.89882	0.446927	0.364137	1.16104	-0.424247	1.11116	-0.480741	0.577658	3
LBR	-0.875611	-2.25414	0.294658	0.216321	0.594568	0.041647	0.657316	0.242458	1.08279	3
ABCD3	-0.444902	-2.45387	0.471823	0.646969	0.546262	-0.1378	0.275581	0.817731	0.278202	3
SEL1L	-0.823254	-2.15793	0.478974	0.435976	0.452532	0.44566	0.59238	-0.52644	1.1021	3
DBT	-0.549815	-2.29689	0.642152	0.556317	0.994731	0.779415	-0.133332	0.210337	-0.20292	3
ERLIN1	-1.31934	-1.99867	0.104086	0.473657	0.486947	1.00607	0.447947	0.0390595	0.760246	3
MCAM	-0.651789	-2.31279	0.16099	0.145696	-0.133642	0.877591	0.55517	0.39684	0.961933	3
PTPRK	-0.999056	-2.24326	0.210656	0.222772	0.26457	0.62494	0.380644	0.561574	0.977164	3
CYP20A1	-0.330663	-2.31305	0.667235	0.519335	0.822092	-0.0262027	0.743549	-0.585551	0.503259	3
PRPF40A	-1.02567	-2.1416	0.684601	0.495518	0.182081	0.235736	0.455213	1.16152	-0.0473976	3
PTGS1	-0.484186	-1.98512	0.112597	-0.256382	0.669027	0.839597	0.377839	-0.682438	1.40906	3
C1GALT1	-0.483732	-2.33568	0.558078	0.50411	0.616265	-0.107251	0.21753	-0.107251	1.13794	3
SNAP25	-0.273448	-2.24035	0.469527	0.391591	0.672235	0.148978	0.32558	-0.702103	1.20799	3
SGPL1	-1.0184	-2.13773	0.460497	0.426173	0.640419	0.371473	0.554572	-0.318036	1.02102	3
TBL2	-1.33915	-1.85532	0.357557	0.364469	0.487686	0.32406	0.77546	-0.321504	1.20674	3
C1GALT1C1	-0.930598	-1.86127	0.35653	0.155998	0.910311	0.150899	-0.48485	0.150899	1.55208	3
VTI1B	-0.59487	-2.33247	0.669641	-0.230442	0.448789	0.375667	0.299144	0.269261	1.09528	3
CAPN5	-0.169358	-2.05145	0.516474	0.404943	0.538379	0.453235	0.2398	-1.14438	1.21235	3
AP3M2	-0.530239	-2.18249	0.0588884	-0.501841	0.75833	0.548853	0.185681	1.28251	0.380308	3
ATP13A1	-0.258819	-2.2292	0.499005	0.449491	0.298067	-0.67332	0.589958	0.0521584	1.27266	3
LMNA	-1.32491	-2.05907	0.242864	0.17576	0.355257	0.548495	0.602535	0.555774	0.903303	3
ITM2A	-0.421868	-1.87777	0.548181	0.533167	0.897943	0.846274	0.623693	-1.32944	0.179825	3
CPNE3	-0.465943	-2.19612	0.296929	0.0913317	0.561475	0.627414	0.277209	-0.531957	1.33967	3
SLC4A4	-0.845095	-2.26924	0.603099	0.750191	0.248364	0.666037	0.16782	-0.132802	0.81163	3
B4GALT4	-0.608048	-2.21106	0.511743	-0.164507	0.367072	0.504974	-0.229886	0.504974	1.32474	3
TOP1	-1.14408	-2.089	0.107969	0.0523949	0.156863	0.6758	0.739603	1.03196	0.468489	3
RBM25	-0.501464	-2.34324	0.405395	0.442511	0.0615101	0.717919	-0.000229946	1.17323	0.0443703	3
AGRN	-0.947322	-2.11922	0.291102	0.0967591	-0.22537	0.807135	0.631937	1.14643	0.318546	3
AP3B2	-0.460691	-2.06505	0.525956	0.218242	0.317486	-0.815803	0.360296	1.43967	0.479895	3
SEC63	-0.811056	-2.1961	0.443086	0.490642	0.550365	0.70622	0.452789	-0.528379	0.892431	3
GPR89A	-0.903777	-1.96837	0.359941	0.488844	0.635837	0.670396	0.507328	-0.84565	1.05545	3
CNTNAP1	-0.504396	-2.40491	0.334834	0.396133	0.206526	1.02137	0.258775	-0.0420762	0.733738	3
MYOF	-1.25995	-1.95102	0.114073	0.134722	-0.0716706	0.95334	0.649034	0.387773	1.04369	3
PRKCA	-0.787176	-2.11219	0.431836	0.412729	0.677215	0.801474	-0.151106	-0.402538	1.12975	3
SORL1	-0.522657	-2.00049	0.294793	0.355204	0.611852	1.22374	0.131595	-0.946501	0.85247	3
DAG1	-0.29915	-2.1217	0.276275	-0.0916019	0.509699	-0.537917	0.545974	0.151938	1.56648	3
ACOT8	-0.752623	-2.20194	0.266095	0.633847	0.678069	-0.419833	0.150832	0.599429	1.04612	3
ITPR1	-0.9145	-2.29862	0.311298	0.43979	0.294172	0.987699	0.477936	0.188867	0.513358	3
ABCA10	-1.05559	-2.1977	0.299635	0.571128	0.133876	0.27582	0.66881	0.299635	1.00439	3
SRRM1	-0.481022	-2.40958	0.295915	0.576333	0.210636	1.12637	0.00872126	0.377986	0.294635	3
STX18	-1.14324	-1.8893	0.411246	-0.289936	0.735188	1.43726	0.320506	0.0168283	0.401441	3
MTPAP	-0.680029	-2.12823	0.0956268	-0.0769409	0.405002	1.16522	0.554727	-0.354272	1.0189	3
ITPR3	-0.492321	-2.366	0.309754	0.156742	0.302962	-0.0563327	0.71178	0.263807	1.16961	3
Average	-0.683936	-2.1518	0.361236	0.288921	0.527056	0.304624	0.431878	0.0546848	0.867336
	±	±	±	±	±	±	±	±	±		Slope =	0.216359
SD	0.272107	0.168808	0.160597	0.249201	0.250848	0.634971	0.282384	0.66173	0.464091
CKB	1.29429	1.5569	0.316497	0.364957	-0.893412	0.252451	-1.06139	-0.869998	-0.960288	4
ENO1	1.41341	1.6231	-0.0616879	-0.0895186	-0.790153	0.573518	-0.98825	-0.756046	-0.924378	4
OCM	1.59024	1.65121	-0.473095	-0.657053	-0.742513	-0.0959343	-1.18077	-0.301118	0.209028	4
RPL12	1.20279	1.61959	-0.550851	-0.000153997	-1.25601	0.846558	-0.928609	-0.598445	-0.334867	4
LDHB	1.29605	1.55779	-0.000323868	0.0855639	-0.562867	0.663407	-0.95358	-0.894366	-1.19168	4
MDH1	1.40603	1.6369	0.165012	0.0706874	-0.691141	0.278446	-0.897221	-0.902934	-1.06578	4
TPI1	1.54423	1.65808	0.0577889	-0.0832226	-0.874844	0.139402	-1.05031	-0.683236	-0.707885	4
PEBP1	1.55992	1.64126	0.00252481	0.0349445	-1.10227	-0.198037	-1.11629	-0.281665	-0.540396	4
GPI	1.41454	1.63953	0.197792	0.259088	-0.698447	0.000731104	-0.786809	-0.863791	-1.16264	4
CALB1	1.54156	1.69085	0.0281692	0.183295	-0.70944	-0.31377	-1.09642	-0.819473	-0.50477	4
CALM	1.40868	1.43216	0.215922	-0.12591	-0.112005	-0.208787	-1.65949	-1.04106	0.0904833	4
MIF	1.56612	1.67475	-0.386083	-0.300319	-0.562878	-0.258282	-1.35724	-0.509655	0.133597	4
ACTR3	1.2238	1.72164	0.0152405	-0.0133893	-0.68261	0.222578	-0.423938	-0.43418	-1.62914	4
ACTR2	1.26867	1.7418	-0.0715919	-0.0224159	-0.727451	0.433656	-0.527932	-0.763565	-1.33117	4
GOT1	1.40554	1.52206	0.409465	0.422409	-0.683878	-0.242306	-0.811941	-1.26866	-0.752696	4
SPARC	1.21336	1.31832	0.262703	0.317896	-0.771779	0.662806	-1.34239	-0.381337	-1.27959	4
PGD	1.37139	1.65797	0.0668533	0.150862	-0.701884	-0.0462778	-0.867775	-0.19707	-1.43407	4
MPST	1.36189	1.69159	0.042329	0.346008	0.0159829	-0.773457	-1.14601	-0.585878	-0.952456	4
AKR1E2	1.12494	1.35345	-0.121634	-0.186352	-0.567	1.15435	-0.765594	-0.435415	-1.55674	4
DJ-1	1.53929	1.65205	-0.0663216	-0.0761217	-0.871334	-0.0125441	-1.28582	-0.653984	-0.225218	4
NAP1L4	1.36583	1.59975	-0.224523	-0.348094	-0.326013	-0.357581	-0.81642	0.579285	-1.47223	4
AVIL	1.25448	1.52787	-0.0515023	-0.158747	-0.797492	0.88527	-0.929363	-1.24161	-0.4889	4
PSMA5	1.53393	1.52877	-0.3104	-0.486629	-0.38141	0.430554	-1.5096	-0.256219	-0.548994	4
ADH5	1.50046	1.63344	-0.0714402	-0.198696	0.0701995	0.0701995	-1.08362	-0.898782	-1.02177	4
ARPC1A	1.27623	1.64509	0.309973	0.154034	-0.726323	0.190427	-0.741979	-0.729623	-1.37783	4
ARPC5	1.51898	1.56179	-0.0999229	-0.399941	-0.476808	0.592059	-0.676785	-1.07574	-0.943634	4
TXNDC5	1.41473	1.59876	0.264575	0.0885295	-1.05861	-0.812759	-1.23077	-0.00248399	-0.261961	4
GSTA4	1.29105	1.59015	-0.251037	-0.248875	-0.836142	0.870085	-0.645035	-0.538277	-1.23193	4
PA2G4	1.41615	1.66259	0.195071	0.285921	-0.955986	-0.119346	-0.796719	-0.595389	-1.09229	4
FTH1	1.43557	1.57074	-0.0242627	0.229344	-1.21316	-0.0744763	-1.15182	0.012028	-0.783957	4
SARS	1.3566	1.5967	-0.110836	-0.163747	-0.546092	-0.110441	-0.163322	-0.0615828	-1.79728	4
ARPC2	1.21098	1.57197	0.103451	0.0079525	-0.713198	0.407529	-0.843579	-0.116708	-1.6284	4
AIF1L	1.54715	1.57102	-0.368222	-0.569539	-0.824699	-0.00321575	-1.40566	-0.0755311	0.128698	4
BLMH	1.44747	1.68221	0.151504	0.0261474	-1.04353	0.148053	-0.776923	-0.803467	-0.831466	4
CNDP2	1.34917	1.51344	0.23452	0.0578835	-0.626453	0.51833	-1.00212	-0.828739	-1.21603	4
RNH1	1.59026	1.64761	-0.331471	-0.16654	-0.843317	0.0988471	-1.08309	-0.0632939	-0.849002	4
SERBP1	1.57059	1.65859	0.0171188	0.263149	-0.971194	-0.545283	-0.977583	-0.530759	-0.484628	4
FKBP4	1.32938	1.75492	-0.235279	-0.247498	-1.49953	0.0723645	-0.614659	-0.632068	0.0723645	4
HSPB1	1.55	1.70133	-0.250568	-0.459802	-0.279936	0.0563721	-1.35776	-0.332748	-0.626896	4
CHMP5	1.49123	1.53192	-0.22848	-0.141812	-1.43451	-0.555815	-0.925446	-0.0914502	0.354362	4
TPD52L2	1.52686	1.62049	-0.557789	-0.709187	-0.325984	-0.677546	-0.698301	-0.850762	0.672217	4
PAFAH1B1	1.3447	1.6643	-0.0338519	0.0315123	-1.37289	0.162996	-0.256084	-0.412633	-1.12805	4
PAFAH1B2	1.29635	1.46221	-0.0676683	-0.152415	-1.11517	0.615303	-0.691128	0.083199	-1.43067	4
PGM2	1.38618	1.72887	-0.145135	-0.0728785	-0.317265	0.289459	-0.940414	-0.705438	-1.22338	4
TXNL1	1.48354	1.60341	-0.359627	-0.0761419	-1.25342	0.293274	-1.02182	-0.0448227	-0.624389	4
DCTN2	1.48463	1.55323	-0.129083	-0.421664	-0.84109	-0.250189	-1.54498	-0.0274042	0.176548	4
TWF2	1.42683	1.68527	-0.532438	-0.662072	-1.01313	0.671259	-0.777105	-0.433967	-0.36464	4
CTH	1.31956	1.54575	-0.127137	-0.24406	0.361319	0.361319	-0.909329	-1.00607	-1.30136	4
EIF6	1.64965	1.40661	-0.500391	-0.327447	-0.752686	-0.112219	-1.50316	0.286783	-0.147141	4
PPP2R4	1.40233	1.59058	-0.557588	-0.753703	-0.807268	0.415336	-1.14776	-0.557257	0.415336	4
FADD	1.30241	1.68311	-0.586796	-0.825304	-1.28771	0.35295	-0.648133	-0.343487	0.35295	4
DNPEP	1.35579	1.6397	-0.179555	0.0251993	-1.11449	0.555307	-1.06774	-0.527451	-0.686754	4
OLA1	1.38984	1.61109	-0.419951	-0.302787	-0.414685	0.461437	-0.344704	-0.381714	-1.59852	4
PREP	1.35601	1.51812	-0.00183115	0.132461	-1.18547	0.625754	-0.863317	-0.639443	-0.942282	4
DCTN3	1.54018	1.66615	-0.186137	-0.468544	-0.290055	0.194397	-1.15015	-0.265491	-1.04036	4
PMM2	1.12023	1.59092	-0.27512	-0.0413947	0.401379	0.401379	-1.5854	-0.835355	-0.776632	4
PDXK	1.4977	1.53242	-0.301506	-0.312073	-1.09868	0.686733	-0.993086	-0.357811	-0.653706	4
UBE2K	1.27047	1.72147	-0.489457	-0.233071	-1.03974	0.414272	-1.20837	-0.618331	0.182762	4
PPT1	1.18389	1.44986	0.415648	0.420357	-0.729241	0.40534	-1.0685	-0.763544	-1.3138	4
AARS	1.38569	1.65119	-0.265877	-0.390632	-0.723579	0.620347	-0.626685	-0.342005	-1.30845	4
EEF1D	1.46638	1.6154	-0.203838	-0.562179	-0.868069	0.426242	-1.33322	-0.161447	-0.379267	4
GPD1L	1.08933	1.58378	0.310215	-0.351155	-0.226587	0.433307	-0.854857	-0.23459	-1.74944	4
C11ORF54	1.26394	1.4959	-0.407146	-0.512393	0.521132	0.521132	-1.42002	-0.499624	-0.962914	4
PSMA3	1.39419	1.64631	-0.558529	-0.949959	0.364051	0.364051	-1.02364	-0.453679	-0.782803	4
PRPSAP1	1.30222	1.62561	-0.240231	-0.374098	0.0115126	0.37945	-0.762973	-0.317656	-1.62383	4
RTCA	1.0985	1.3893	0.343971	0.0583436	-1.25547	0.375875	-0.576164	0.194773	-1.62912	4
EIF1AY	1.19652	1.83756	-0.277908	-0.631424	-1.41413	0.123882	-0.815383	-0.143	0.123882	4
CHMP4B	1.31617	1.6766	-0.0444428	-0.217786	-0.860345	0.374761	-0.827154	-1.35597	-0.0618355	4
ALDOB	1.2313	1.4761	-0.284076	-0.285952	-1.55223	0.472404	-1.00627	-0.523686	0.472404	4
STRAP	1.46901	1.67942	-0.412438	-0.258152	-0.998399	0.502857	-1.04824	-0.475007	-0.459046	4
TTC38	1.39126	1.6351	0.0101619	-0.0892747	-0.823284	0.41855	-0.883453	-0.397619	-1.26143	4
GARS	1.22832	1.55808	-0.0276769	0.0471035	-0.295657	0.467473	-0.819605	-0.464871	-1.69317	4
COPS4	1.25224	1.70614	-0.16805	-0.430239	-0.185282	0.380121	-0.525885	-0.384551	-1.6445	4
KIRREL	1.33422	1.82691	-0.566472	-0.41377	-0.541063	0.493808	-1.1292	-0.309825	-0.694609	4
PYGL	1.34854	1.6734	-0.190919	-0.224746	-0.723953	0.644775	-0.663391	-0.633864	-1.22984	4
TPP2	1.21378	1.56158	-0.624156	-0.436959	0.560879	0.560879	-1.05557	-0.590767	-1.18966	4
ADRM1	1.15425	1.64257	-0.76941	0.392924	-1.35639	0.392924	-0.52042	0.0415764	-0.978021	4
PSMF1	1.24867	1.5059	-0.356249	-0.324088	-0.407736	0.608024	-1.58391	0.228256	-0.918867	4
GART	1.35971	1.74081	-0.609265	-0.437119	-0.958833	0.72126	-0.535046	-0.716552	-0.564967	4
NONE	1.58269	1.57198	-0.325618	-0.732319	-0.263516	0.561824	-1.03526	-0.692255	-0.667521	4
CES1	1.24112	1.4027	0.242727	-0.130854	-1.11139	0.680911	-0.715438	-0.130476	-1.4793	4
GLRX3	1.40194	1.63373	-0.265163	-0.324904	-0.544794	0.60006	-0.589049	-0.532692	-1.37913	4
GRB2	1.52981	1.34332	0.022134	-0.888784	-0.456503	0.65002	-0.895415	-0.0273397	-1.27724	4
FASN	1.21158	1.67455	-0.423933	0.0243947	-1.37786	0.681962	-0.848589	-0.370678	-0.571434	4
BCAS1	1.24443	1.40978	0.00868071	-0.0495655	-1.65257	0.670036	-0.871775	-0.0378726	-0.721141	4
MPP6	1.25525	1.41768	-0.02159	-0.402174	-1.00981	0.994893	-0.703124	-0.228795	-1.30233	4
MVK	1.41512	1.61365	-0.191084	-0.494756	-0.779958	0.752764	-0.606558	-0.621389	-1.08778	4
FAM129A	1.17057	1.57219	-0.331625	-0.103571	-1.05162	0.786939	-1.34286	0.0131666	-0.713202	4
AHNAK2	1.39939	1.75438	-0.457681	-0.447846	-1.17498	0.343013	-0.979615	-0.235494	-0.201172	4
RCN1	1.21231	1.5222	-0.165633	-0.0173095	-0.948956	0.834595	-1.4161	-0.334849	-0.686253	4
GALK2	1.01879	1.68717	0.61839	-0.366361	-0.948113	0.61839	-0.964758	-0.871645	-0.791865	4
DCTN1	1.25493	1.55161	-0.319991	-0.223832	-0.710129	0.871758	-0.758605	-0.26803	-1.39771	4
FKBP7	1.21627	1.51418	0.0710824	-0.919633	-0.908225	0.964577	-1.14235	-0.407101	-0.388809	4
GALC	1.17475	1.58568	-0.118713	0.422356	-0.703679	0.441793	-0.847236	-1.52248	-0.432471	4
Average	1.35752	1.59836	-0.141157	-0.189741	-0.734489	0.32385	-0.948163	-0.465256	-0.800927
	±	±	±	±	±	±	±	±	±		Slope =	-0.265418
SD	0.136555	0.101745	0.276582	0.319549	0.457316	0.401686	0.302501	0.371833	0.591259
ATP5B	0.216032	-1.12167	0.858937	0.916815	0.37017	1.45774	-1.09996	-1.228	-0.370055	5
ATP1A1	0.0346309	-1.19642	0.877196	1.02427	0.0809134	0.862703	-0.363905	-1.88345	0.564063	5
ATP1B4	0.427493	-0.764309	1.17626	1.24143	0.045499	-0.0504277	-0.310989	-2.03345	0.268491	5
CD9	0.468946	0.0930765	0.775025	0.865851	0.256452	-1.00021	0.220605	-2.23548	0.555734	5
GJB2	0.0634648	-2.40099	0.691296	0.729667	0.636163	-0.31101	0.351671	0.652361	-0.412626	5
RAP1B	-0.304218	-1.44556	0.987885	0.963586	0.355238	0.960374	-1.08643	-1.10755	0.676674	5
HK1	-0.029779	-1.75337	1.03967	1.17904	0.175406	0.897578	-0.363034	-1.21675	0.0712275	5
CYB5R3	-0.550521	-1.33439	0.521729	0.976508	0.840914	0.510982	0.196429	-1.80741	0.645759	5
UQCRH	0.341927	-1.27131	0.730756	0.708631	0.577977	-1.27131	-0.489018	-0.850249	1.5226	5
C1QBP	-0.00749766	-1.59781	1.24315	1.14457	0.225567	0.797643	-1.31636	-0.405697	-0.0835667	5
PDHB	0.582412	-0.411475	1.00062	1.25876	0.761347	-0.0348048	-1.7659	-1.04126	-0.349703	5
PRDX3	0.783045	-0.0445241	1.06908	0.857975	0.421206	-0.242564	-1.83408	-1.34038	0.330245	5
TSPO	0.109158	-1.89313	1.2159	0.309496	0.826329	-0.209008	0.201123	-1.25622	0.696346	5
MYH9	-0.240846	-1.05299	1.35723	1.74965	-0.377502	-0.0993081	-1.0163	-0.748798	0.428856	5
PDHA1	0.832793	-0.222013	1.25748	1.38648	0.373047	-0.527453	-1.32797	-0.853812	-0.91855	5
RALA	0.44098	-0.409047	0.722051	0.466765	0.688142	0.348717	-0.647058	-2.31991	0.709359	5
UQCR11	0.45834	-1.09629	0.794157	0.882804	1.10065	-1.30043	0.719499	-1.30043	-0.258316	5
GJB6	-0.276235	-1.59248	0.688665	0.681085	0.935714	-1.59248	0.941154	0.361477	-0.146902	5
DLAT	-0.0190502	-1.9134	0.872656	0.962535	1.02978	0.743472	-0.50273	-0.806087	-0.367176	5
MT-ATP6	0.643785	-1.40983	1.18846	1.05484	0.355529	0.226405	0.117618	-0.582403	-1.59441	5
DLST	0.0791936	-1.16944	1.06007	1.04299	0.707911	0.903468	-1.06693	-1.38949	-0.167773	5
NDUFS6	-0.0330256	-0.391414	0.575741	0.432446	0.68558	-0.391414	-0.870705	-1.72782	1.72061	5
IDH3G	1.06929	-0.061537	0.696747	0.973671	0.800055	-1.91245	-0.597675	-0.0993748	-0.868734	5
ACAD9	-0.0754691	-0.645761	0.830395	0.878737	0.978122	1.20005	-0.798764	-0.810419	-1.55689	5
UGGT1	-0.158611	-0.920421	0.552015	0.577687	1.09066	1.40708	-0.652335	-1.68855	-0.207528	5
SCP2D1	0.199564	-1.35502	0.543004	0.73011	0.862293	1.30075	-0.161089	-0.517425	-1.60219	5
SAMM50	-0.489296	-1.7654	1.20554	1.29926	0.450915	-0.295236	0.355752	-1.01146	0.249923	5
TMEM33	-0.229233	-1.10282	0.990614	0.949147	0.919695	-1.85844	0.651639	-0.351855	0.0312527	5
NDUFAB1	0.399452	-0.548158	0.596	1.42254	0.367656	-0.997135	-0.800799	-1.50309	1.06353	5
SLC30A9	-1.07535	1.74241	0.654392	1.05903	-0.605641	0.300586	-1.08955	-0.745515	-0.240357	5
GCAT	0.041462	0.141864	1.13362	1.04622	0.649356	0.577278	-1.04543	-0.765367	-1.77901	5
MRPS36	0.766615	-0.21214	1.44292	1.14334	-0.194069	0.215909	-0.984046	-1.61483	-0.563696	5
MT-ND5	0.0987341	-1.57888	1.11503	1.14931	0.833376	-0.652358	0.33216	-1.30488	0.00751461	5
RNPS1	-1.43417	-1.50418	1.24815	0.864495	0.0839291	-0.264743	0.0405633	1.1272	-0.161246	5
MYF6	0.368617	-1.36378	1.05173	1.16779	0.663524	-0.828879	0.754717	-0.596493	-1.21722	5
IDH3B	0.476017	-0.403396	1.17509	0.718526	1.51267	-1.13718	-0.817848	-0.373201	-1.15068	5
BSND	0.269391	-0.652525	1.28145	1.16604	0.225185	-0.548073	-0.497761	-1.87238	0.62867	5
MRPS17	-0.775703	-1.32117	1.12279	1.18262	0.930423	-1.32117	0.2335	0.378426	-0.429725	5
SLC25A1	-0.26034	-0.875366	1.14562	1.09029	0.823249	-0.875366	0.422419	-1.72549	0.254984	5
PTCD1	0.389892	-1.70771	1.07302	1.1548	0.652925	-0.497958	0.608936	-0.817884	-0.856018	5
CDH3	-0.626401	-0.313718	0.987461	0.825445	-0.407387	-0.313718	-1.15333	-0.869682	1.87133	5
CPT2	0.228042	-0.411009	1.05443	1.28652	1.21304	-0.689319	-1.24667	-1.20824	-0.226805	5
TIMM50	-1.09233	-0.952317	0.986778	1.16091	0.85162	-0.979155	-0.0885479	-0.913074	1.02611	5
TMEM11	-0.327599	-1.14609	0.835368	1.08265	0.941967	-1.14609	0.635337	-1.36552	0.489974	5
UQCC2	-0.409004	-0.881144	1.22664	0.723665	0.904866	-0.881144	0.0843329	-1.63522	0.867011	5
SLC25A15	-0.637906	-0.728203	0.566448	0.803056	0.741572	0.91828	0.185501	-2.14103	0.292286	5
BCKDHB	-0.573146	-1.64177	1.24223	0.94755	1.06891	-0.739253	-0.751884	0.524249	-0.0768824	5
SLC25A10	0.126615	-1.25533	1.20107	1.16955	0.438678	-0.458561	-0.291204	-1.62234	0.691528	5
ACOX1	0.470274	-0.259276	1.39519	1.28843	-0.773086	-1.72466	-0.12532	0.354296	-0.625842	5
GORASP2	0.0880475	-1.08535	1.29007	0.780439	0.9554	-0.515537	-1.55701	-0.66253	0.706473	5
MRPS23	-0.337603	-0.929563	1.03262	0.910093	0.494752	0.743248	-0.679027	-1.86367	0.629147	5
LONP1	-0.249801	-1.63419	1.12399	0.677256	0.327548	-0.911502	0.108844	1.38333	-0.825482	5
AP3M1	0.543481	0.831587	0.791165	0.245767	1.22264	-0.692268	-0.235599	-0.790417	-1.91635	5
TOMM22	-1.04112	-0.761837	1.10125	1.30019	0.541254	-1.10382	-0.370929	-0.761837	1.09684	5
ECI2	0.529463	0.236431	0.746141	0.841777	1.03436	-1.57806	-1.64132	0.170661	-0.339457	5
IARS2	0.0984919	-1.0371	0.916998	0.908491	0.84496	0.881765	-0.893079	-1.7203	-0.00023017	5
RAB3B	0.348302	-0.441967	0.996909	0.659695	-0.577467	-0.980734	-0.0561033	-1.54825	1.59962	5
LOC771069	0.422159	-0.256728	1.04106	1.14764	0.358894	-0.133919	0.143499	-0.500687	-2.22193	5
DSG2	-0.475653	-2.15671	0.876616	0.84131	-0.213537	0.278561	0.545417	0.919861	-0.615869	5
ALDH5A1	0.542122	0.266493	1.25046	1.26349	0.17768	-0.104674	-1.3671	-1.51732	-0.511164	5
PDHX	-0.0227911	-1.4899	0.912259	0.815861	1.00783	0.773672	-1.27907	-0.980965	0.263107	5
MRPL37	0.10689	-0.233751	1.31361	1.61022	-0.595424	-0.191838	-0.751916	-1.59529	0.337493	5
HTRA2	0.727716	-1.89943	0.83264	0.426559	0.758232	-0.104506	-0.867125	-0.843041	0.968958	5
DUSP15	0.562905	-0.0922148	1.3252	1.23661	0.109703	0.10154	-1.11738	-1.71804	-0.408331	5
GCDH	0.158814	-0.293011	0.915349	0.964725	1.67369	-0.417492	-0.873476	-0.823083	-1.30552	5
APOOL	-0.922949	0.16636	1.12713	0.676362	0.328265	0.16636	-0.486835	-2.02133	0.966636	5
DNAJC5	-0.205311	-0.988029	0.571327	0.541545	1.08937	0.125212	-0.235598	-1.98229	1.08377	5
RRAS2	0.98725	-0.715948	1.34844	0.0902013	0.561417	0.381603	0.23498	-1.45365	-1.4343	5
MCU	-1.03761	0.0615653	0.916003	0.824699	0.710952	0.0615653	0.197673	-2.16111	0.426258	5
HSDL1	-0.236331	0.000698037	1.04414	0.944174	0.194544	0.000698037	0.706509	-2.30252	-0.351906	5
MRPL40	0.215524	-1.7908	1.10711	1.12995	0.0307048	0.260999	-0.488569	-1.18856	0.723647	5
SLC25A25	-0.0978039	0.183716	0.908995	0.899617	0.339893	-0.0880863	-0.375062	-2.38371	0.612438	5
ALDH18A1	-0.149342	-0.182806	0.927218	1.01046	1.72592	-0.684907	-1.03429	-0.455265	-1.15699	5
ABCD4	-0.599364	-1.27872	0.284999	1.54279	1.07265	0.375109	-0.0113722	-1.49684	0.110754	5
AUH	0.764979	0.0105046	1.07925	1.01924	-0.319669	0.200137	0.200137	-2.05349	-0.901086	5
CA9	0.38971	-1.1986	1.32499	1.1712	0.162095	0.711454	-0.980403	-1.31063	-0.269824	5
EPHX1L	-0.377352	0.321402	0.984539	1.03613	0.369561	0.321402	0.119654	-2.28376	-0.491578	5
AFG3L2	-0.249337	0.361599	1.13907	1.04725	0.107935	-0.438539	-0.311794	-2.19561	0.539433	5
CLCC1	-1.5186	-1.6563	0.8732	0.724709	0.485075	0.576599	-0.122103	-0.343507	0.980918	5
C20H20ORF108	-1.50714	0.253133	1.11431	1.04551	0.518964	0.253133	0.138442	-1.7229	-0.093453	5
MRPL10	-0.689422	0.485944	1.20217	1.2427	0.400233	0.485944	-0.598259	-0.848663	-1.68065	5
LRRC1	-0.120566	0.610078	1.06336	1.08569	-0.378977	0.610078	-1.67313	-1.396	0.199476	5
NONE	-1.92595	0.547682	1.30466	0.860684	0.0602985	0.547682	-0.197398	-0.104821	-1.09283	5
MRPS9	-1.18362	-1.61957	1.10034	1.14099	0.724851	0.761979	-0.277263	-0.511945	-0.135768	5
MYO18A	-0.543598	-1.46063	1.10089	1.40221	-0.559914	-1.18816	0.146433	0.689585	0.413188	5
CLCNKA	-0.533609	-0.672504	0.511696	0.720181	1.76402	0.652116	-1.61173	-0.455195	-0.374981	5
MRPL46	-0.740382	0.246836	0.986725	0.839306	0.146937	0.773843	-0.123117	-2.25008	0.119936	5
VAMP7	0.0601807	-0.888565	0.669304	0.497757	0.953687	0.360988	-0.0289824	-2.25287	0.628499	5
LRRC75A	-0.764811	-0.187422	1.29224	1.48275	-0.884687	0.936695	-0.507933	-0.109251	-1.25758	5
MRPL15	-0.975176	0.788213	1.06848	1.00192	0.257659	0.788213	-1.3609	-1.29047	-0.277932	5
PDK3	-0.0125922	-2.08288	0.905441	0.531161	1.04548	0.919911	-0.553981	-0.253399	-0.499141	5
ZADH2	0.250279	0.0613571	0.358998	0.809107	1.20272	-0.0458425	-1.75164	-1.50117	0.616191	5
MRPL23	-0.663918	0.767599	1.11815	1.22893	0.021793	0.767599	-1.08458	-1.32295	-0.832631	5
MRPL39	0.0511379	0.75857	0.757326	1.07636	-0.150104	0.75857	-0.869007	-2.0568	-0.326053	5
MRPL44	-0.0350024	0.76705	0.927591	1.06195	-2.96119e-05	0.76705	-0.820281	-1.88236	-0.78597	5
AGPS	-1.34454	-1.4827	0.812434	0.923558	0.387187	1.24375	0.290776	-0.836277	0.00581455	5
COQ5	-1.42052	-0.716086	0.503114	0.713764	1.29988	1.15814	-0.463963	-1.20178	0.127452	5
AL445665.1	0.557187	-0.219846	0.997335	0.914819	0.893246	0.5203	-1.50792	-0.80835	-1.34677	5
GLRX5	-0.217813	-0.434595	0.770281	0.824339	-0.0531459	1.00032	1.00032	-1.8395	-1.05022	5
CLPX	-0.15283	-1.62726	1.02253	0.610625	1.51262	-0.189785	-1.10064	-0.468893	0.393631	5
DDO	0.993301	-1.76012	0.742502	0.400518	-0.166662	1.44581	-0.291835	-0.493693	-0.869818	5
MRPL21	-0.496922	-1.74941	0.710324	0.671865	0.524139	1.53493	-0.00262221	-0.151648	-1.04065	5
COQ6	0.57654	-1.3524	0.585178	0.503931	0.908698	1.0296	-0.645426	-1.71137	0.105251	5
PDK1	-0.298567	-0.878762	0.747308	0.400079	1.01818	1.535	-0.176307	-0.825597	-1.52134	5
GLS	-0.462236	-0.496774	0.467589	0.784549	0.535201	1.94345	-0.725922	-1.1283	-0.917559	5
ANK1	-0.0859814	-1.10688	0.659426	0.744159	-0.12415	1.95877	-0.821281	-1.1135	-0.110568	5
Average	-0.112842	-0.728813	0.959059	0.938731	0.50881	0.0737911	-0.445351	-1.06247	-0.130913
	±	±	±	±	±	±	±	±	±		Slope =	-0.079117
SD	0.611242	0.816377	0.25282	0.2961	0.549595	0.872394	0.669355	0.81661	0.845742
ATP5A1	-0.152192	-1.97437	0.907304	0.991616	0.528424	0.954277	-0.495985	-0.903103	0.144023	6
SLC25A6	-0.0478949	-1.89528	0.87309	0.863246	0.403064	0.903757	0.0537388	-1.36759	0.213863	6
MT-CO1	-0.0394247	-1.76901	0.858755	0.694272	0.125278	0.233087	0.101754	-1.43432	1.22961	6
ATP5C1	-0.271347	-2.32105	0.667258	0.828781	0.576703	0.949631	-0.095877	-0.398977	0.0648817	6
ATP5O	0.0742916	-2.04831	0.89571	0.991125	0.561925	-0.0524129	0.28832	-1.17999	0.469338	6
VDAC1	0.0522763	-1.73557	0.569863	0.60566	0.606536	0.588837	-0.000748422	-1.63629	0.949437	6
UQCRC1	-0.0369583	-1.96688	0.591703	0.662964	0.461638	0.631718	-0.20555	-1.22612	1.08748	6
SLC25A3	-0.109911	-1.9593	0.822751	0.972012	0.714702	0.58067	0.246609	-1.27221	0.00467612	6
UQCRQ	-0.0324234	-2.31215	0.659033	0.591762	0.437711	0.834985	0.254432	-0.857371	0.424021	6
PHB	-0.182917	-2.11684	0.592437	0.576462	0.351534	1.1615	-0.12918	-0.926778	0.673777	6
PHB2	-0.29342	-2.33179	0.731247	0.903964	0.439677	0.357285	0.327686	-0.65357	0.518921	6
COX5A	-0.163233	-2.01451	0.714287	0.700711	0.726887	0.176283	-0.181599	-1.05659	1.09777	6
NDUFA5	-0.122581	-2.22367	0.752255	0.736966	0.552928	0.0213197	0.224316	-0.857625	0.916093	6
NDUFA8	-0.134872	-2.15604	0.56053	0.573395	0.479961	0.889066	0.0393832	-1.03025	0.778823	6
NDUFS1	-0.0922202	-2.08331	0.665551	0.771233	0.269533	0.81274	-0.0582809	-1.10082	0.815575	6
NDUFV1	-0.0936831	-1.82242	0.817821	0.906051	0.342035	0.786797	0.0510684	-1.48223	0.494563	6
NDUFS2	-0.0964238	-2.10105	0.622079	0.77373	0.31835	1.14059	0.00175634	-1.02636	0.367327	6
NDUFA9	-0.135507	-2.25279	0.673443	0.706885	0.373628	0.687374	-0.0364897	-0.826755	0.81021	6
IMMT	-0.249131	-1.98926	0.574433	0.601782	0.151346	1.41769	-0.237326	-0.897421	0.627877	6
SDHB	-0.226091	-2.21569	0.936789	1.05002	0.512325	-0.000985117	-0.0740335	-0.620191	0.637859	6
SLC25A13	-0.0741506	-2.15506	0.806191	0.783466	0.474631	0.483201	0.226172	-1.11731	0.572858	6
SDHA	0.056619	-1.87252	0.866089	0.998481	0.237148	0.882774	-0.483297	-1.19102	0.505725	6
AC024592.12	0.142809	-1.80157	0.48794	0.49186	0.629252	0.927909	0.324539	-1.64261	0.439869	6
NDUFB10	0.0607847	-2.13008	0.574868	0.580602	0.349306	0.816189	-0.144324	-1.04783	0.940489	6
NDUFS7	0.0783674	-2.43957	0.820264	0.74086	0.397869	0.164639	0.225641	-0.534535	0.546462	6
CLDN3	-0.0413063	-2.04565	0.675593	0.931191	0.532545	-0.534355	0.811475	-0.941964	0.612474	6
MGST3	-0.223403	-2.11029	0.888711	1.07738	0.566232	0.224377	0.22322	-1.00009	0.353865	6
AIFM1	0.00140287	-2.25386	0.680121	0.686866	0.334392	0.576873	0.1211	-0.943991	0.7971	6
SLC25A20	0.0352312	-2.10449	0.751395	0.824957	0.740433	-0.378632	0.533306	-0.997281	0.595084	6
ABHD12B	-0.385909	-2.2699	0.682385	0.507775	0.681947	-0.0616969	0.458124	-0.587846	0.975119	6
FUNDC2	-0.084493	-2.20516	0.696516	0.767648	0.751217	-0.538886	0.224596	-0.538886	0.927446	6
ITGA6	-0.485267	-2.43838	0.723588	0.745463	0.205959	0.294762	0.32205	-0.0758061	0.707634	6
ARVCF	-0.361068	-2.43514	0.740947	0.717355	0.46751	-0.347106	0.503661	0.237296	0.476543	6
CPT1A	-0.218876	-2.32579	0.727344	0.776984	0.514933	-0.0440174	0.576322	-0.640156	0.633258	6
DNAJC11	0.158048	-2.47349	0.821972	0.755232	0.339341	0.0703026	0.197697	-0.405247	0.536145	6
GNA13	-0.454034	-2.00348	1.00437	0.967507	0.998259	-0.217153	0.0388701	-0.772988	0.438647	6
RHOT1	-0.774855	-2.21164	0.892131	0.95842	0.496431	0.0762921	0.310477	-0.328162	0.580902	6
MRPS27	-0.291911	-2.21494	1.05887	1.02129	0.615152	-0.0501835	0.0385549	-0.560923	0.384099	6
SLC16A7	-0.754443	-2.10271	0.729271	0.819441	0.477637	-0.140282	-0.122938	-0.140282	1.2343	6
DAP3	-0.356092	-2.41333	0.97908	0.646392	0.4995	0.472259	0.275558	-0.295431	0.192062	6
MRPS35	-0.462749	-2.27628	0.596506	0.703345	0.765809	0.529669	0.169963	-0.667992	0.641724	6
MRPS22	-0.409732	-2.40536	0.624902	0.89314	0.546022	0.601573	0.25424	-0.305401	0.200612	6
RETSAT	-0.528291	-1.83875	0.410711	0.840235	0.649941	0.999659	-0.0477922	-1.22349	0.737768	6
PTCD3	-0.75603	-2.30054	0.728834	0.699786	0.567083	0.801761	0.0832457	-0.165283	0.341144	6
Average	-0.192796	-2.13903	0.737612	0.782689	0.494835	0.42464	0.118056	-0.832768	0.60676
	±	±	±	±	±	±	±	±	±		Slope =	0.0919974
SD	0.232903	0.197847	0.141308	0.152738	0.176061	0.49095	0.261281	0.426851	0.296192
CLTC	1.16438	1.63507	-0.40881	-0.547229	-0.879994	-0.786327	0.178564	0.826261	-1.18191	7
EIF4A2	1.32641	1.90567	-0.498862	-0.423097	-0.393198	-0.833096	-0.0582958	0.120988	-1.14652	7
HEBP2	1.43171	1.75737	-0.478992	-0.464101	-0.107105	-1.47382	-0.0729464	-0.133567	-0.458551	7
RAN	1.35089	1.82129	-0.223391	-0.312142	-0.579681	-1.19883	-0.156762	0.226763	-0.928143	7
NACA	1.1772	1.76549	-0.147338	0.0217498	-0.194391	-1.62802	-0.308503	0.134524	-0.820713	7
SEPT7_	1.32623	1.69653	-0.0780863	-0.275404	-0.56072	-1.29661	-0.133512	0.380995	-1.05942	7
PPP1CC	1.2226	1.6651	-0.0722292	-0.300621	-0.736809	-1.41172	-0.110795	0.598984	-0.854512	7
CCT3	1.26391	1.82269	-0.198636	-0.217374	-0.41524	-1.45992	-0.366455	0.266936	-0.695914	7
PFKL	1.26986	1.66779	-0.252907	-0.417145	-0.706993	-1.12532	0.0239089	0.635206	-1.09441	7
DPYSL3	1.3647	1.60322	-0.0390496	-0.0941671	-0.696828	-1.5473	-0.104333	0.280366	-0.766609	7
EHD3	1.20726	1.73882	-0.320473	-0.265741	0.0223685	-1.62824	-0.17918	0.210964	-0.78578	7
CCT3	1.38248	1.81123	-0.353171	-0.157901	-0.575262	-1.25279	-0.134297	0.130113	-0.850393	7
TAGLN2	1.3951	1.5573	-0.21916	-0.440134	-0.38475	-1.23761	-0.0808236	0.57869	-1.16861	7
SEPT1_	1.38317	1.83007	-0.477009	-0.476082	-0.491723	-0.963978	-0.178996	0.35241	-0.977863	7
PFKP	1.3181	1.72666	-0.287572	-0.763872	-0.800574	-0.994529	0.209721	0.450972	-0.858901	7
EIF2S3	1.26174	1.69892	-0.216653	-0.430377	-0.442718	-0.764136	-0.0513482	0.459715	-1.51514	7
PADI1	1.30744	1.71617	-0.373375	-0.447757	-0.859446	-1.21255	-3.24118e-05	0.56249	-0.692929	7
IQGAP1	1.37341	1.89044	-0.208511	-0.216593	-0.767997	-1.13976	-0.218998	0.00405774	-0.716047	7
CCT8	1.41031	1.84007	-0.242039	-0.237463	-0.512153	-1.13056	-0.330871	0.122142	-0.919434	7
PSMC5	1.45681	1.68652	-0.661586	-0.851935	-0.598	-0.720772	-0.170787	0.620442	-0.760688	7
UBE2M	1.38172	1.71096	-0.813209	-0.659638	-0.535158	-1.05489	-0.141631	0.622293	-0.510444	7
ALB	1.27731	1.67271	-0.401291	-0.444768	-1.17235	-0.961885	0.0784701	0.648474	-0.696674	7
CCT5	1.395	1.72841	-0.0382927	-0.129096	-0.477849	-1.48692	-0.437729	0.0867989	-0.640322	7
ADD1	1.1993	1.65946	-0.332817	-0.288577	-1.14421	-0.903852	0.141997	0.674773	-1.00607	7
MAPK1	1.23662	1.61566	-0.622205	-0.626259	-0.97683	-0.790115	0.0903511	0.90004	-0.827261	7
VPS35	1.29392	1.772	-0.250446	-0.430767	-0.947454	-0.654256	-0.00868985	0.422763	-1.19707	7
ARCN1	1.14087	1.75443	-0.383045	-0.468953	-0.553858	-0.820417	-0.0226983	0.692838	-1.33917	7
HSPA4L	1.40049	1.7039	-0.0797934	-0.12625	-0.780383	-1.50697	-0.202383	0.0287888	-0.437399	7
CTBP1	1.25644	1.57432	-0.406383	-0.508645	-0.79385	-0.477535	0.0701708	0.738313	-1.45283	7
DYNC1H1	1.30884	1.73541	-0.10097	-0.210821	-0.934758	-1.27574	0.00469149	0.275488	-0.802148	7
PSMC6	1.40973	1.78793	-0.732391	-0.539017	-0.587947	-0.631384	-0.143724	0.448279	-1.01148	7
ADD3	1.21689	1.70213	-0.397653	-0.190137	-0.898698	0.035601	-0.392419	0.433265	-1.50898	7
ARF6	1.23589	1.76317	-0.251476	-0.0899822	-0.453765	-0.481242	0.118136	-0.163113	-1.67762	7
CAND1	1.33401	1.72039	-0.112401	-0.200736	-0.740009	-1.05658	-0.0319528	0.294053	-1.20677	7
PSMD3	1.40666	1.8264	-0.412762	-0.738875	-0.57453	-0.437203	0.0447745	0.0850445	-1.19951	7
FAM129B	1.2443	1.81369	-0.148014	-0.152023	-0.486	-0.627652	-0.195921	0.112394	-1.56078	7
HDLBP	1.18572	1.7957	-0.234961	-0.370389	-1.10823	-0.73383	-0.119574	0.602184	-1.01663	7
PSMD1	1.37756	1.84422	-0.537666	-0.585877	-0.406241	-0.782603	-0.208973	0.357745	-1.05816	7
CORO1C	1.38301	1.60666	-0.319996	-0.615223	-1.44997	-0.333023	0.130236	0.396685	-0.79837	7
EIF2S1	1.30567	1.7754	-0.181914	-0.391985	-0.854096	-0.754112	0.103639	0.255309	-1.25791	7
VCL	1.38568	1.82999	-0.416242	-0.617684	-0.47942	-1.18187	-0.130366	0.282719	-0.672798	7
EPRS	1.30497	1.92233	-0.157267	-0.233693	-0.807978	-0.873822	-0.390218	0.193002	-0.957319	7
PSMD2	1.46564	1.72638	-0.266899	-0.333257	-0.536327	-1.36944	-0.319495	0.239146	-0.605754	7
PSMC1	1.37007	1.85085	-0.667297	-0.620173	-0.784284	-0.239459	-0.286355	0.366055	-0.989406	7
KPNB1	1.15847	1.93483	-0.4453	-0.410471	-1.02206	-0.102636	-0.301632	0.326683	-1.13788	7
VPS26A	1.29338	1.7642	-0.498141	-0.487897	-0.929133	-0.0417558	0.115311	0.137323	-1.35329	7
SEC24C	1.26666	1.7473	-0.50826	-0.683608	-0.980463	-0.0623328	0.000359499	0.431059	-1.21072	7
PSMC2	1.39397	1.81212	-0.840652	-0.619418	-0.900747	-0.353544	-0.183994	0.422821	-0.730559	7
CRMP1	1.33992	1.6637	-0.404502	-0.401798	-0.896965	0.140196	-0.124982	0.180809	-1.49638	7
DNM1L	1.27486	1.70328	-0.553047	-0.502554	-1.00046	0.126321	-0.0691206	0.351201	-1.33048	7
DNM2	1.31712	1.79621	-0.41114	-0.577202	-0.698916	-0.779438	-0.02619	0.479538	-1.09999	7
DNM1	1.29673	1.58082	-0.36469	-0.427908	-1.11445	-0.624888	0.167648	0.668313	-1.18158	7
Average	1.31252	1.74483	-0.347096	-0.403867	-0.705935	-0.863522	-0.0945577	0.361933	-1.00431
	±	±	±	±	±	±	±	±	±		Slope =	-0.222844
SD	0.0815469	0.0895363	0.194694	0.195374	0.283265	0.473494	0.162227	0.238825	0.298405
RPL23A	-0.264236	0.911432	-0.531272	-0.34392	-1.3922	-0.788429	-0.235656	0.780179	1.8641	8
SEC22B	-1.07617	-1.38668	-0.145555	-0.378682	0.930197	0.248723	0.961325	-0.704523	1.55137	8
MMP2	-1.22223	-0.26284	-1.19415	-1.1623	0.60022	0.574104	0.981806	1.38403	0.301359	8
KRT18	-0.141848	-0.599459	-0.816112	-0.860012	1.21062	-0.769165	0.124266	2.02762	-0.175915	8
RPS28	0.351727	0.732834	-0.720054	-0.175983	0.667189	-1.06348	-0.918429	-0.80365	1.92984	8
MYL12A	-0.502623	-0.926673	-0.370898	-0.97192	0.394439	0.941311	-1.10106	0.860549	1.67688	8
LGALS1	-0.112996	-0.910277	0.340704	0.247654	0.592372	-0.447034	-1.5197	-0.20987	2.01914	8
GPX2	-0.322964	0.017592	-1.45918	-1.7375	0.534673	0.938766	0.341682	0.701116	0.98581	8
ATP2B2	-1.05049	-1.47712	-0.582248	-0.698764	0.676053	0.874876	0.892304	-0.00159248	1.36698	8
SEC61B	-0.877105	-1.15624	0.148794	0.613224	1.03946	-1.49149	1.46867	0.103061	0.151624	8
DNAJB11	-0.784398	-0.899431	0.365984	0.22866	1.03077	-1.27356	-0.683826	0.231455	1.78434	8
CHTOP	-1.3568	-1.49289	-0.338585	0.394151	0.721724	-0.355247	0.564564	0.239074	1.62401	8
XIRP2	-1.68107	-0.0931768	-0.59359	-1.32291	0.26672	0.743388	0.728804	0.93625	1.01558	8
TMX4	-1.41596	-0.956787	0.303186	-0.471648	1.0087	-0.956787	0.970677	0.152274	1.36635	8
CTNNA2	-0.351545	-1.47736	0.439579	0.561889	-0.156562	-1.58411	1.27718	0.340089	0.950841	8
MRPS14	-0.0574925	-0.246348	-0.338442	-0.782714	-0.283306	-1.33511	1.93673	1.25432	-0.147632	8
SLC9A3R2	-0.370756	-0.659187	-0.902045	-1.68304	0.123967	0.99159	0.352956	0.652096	1.49442	8
CBX3	-0.698059	-1.57271	0.312559	-0.404475	0.430767	-0.633176	-0.293495	1.52836	1.33023	8
TOLLIP	0.0455787	-1.38427	-0.179	-0.545386	0.223102	-1.20356	0.381884	0.798919	1.86274	8
CD99	-0.0967091	-0.709766	-0.0676479	-0.191116	-0.0792329	-1.46097	0.968279	-0.41173	2.0489	8
GGT5	-0.75631	-1.01709	-0.644981	-0.705087	0.114793	-0.533131	1.04612	0.549858	1.94583	8
CTNNA2	-0.566729	-1.39838	0.501019	0.370785	-0.127281	-1.39573	0.495632	0.398405	1.72227	8
PTPRQ	-1.4526	-1.61793	-0.675943	0.424696	0.118905	0.647251	0.808903	0.768356	0.978367	8
SUN2	-2.12625	-0.401702	0.040165	-0.1357	0.0436961	-0.401702	0.992884	1.28697	0.701633	8
STX7	-0.322716	0.202057	-0.400187	-0.765716	-0.538497	-1.38071	0.663448	0.483636	2.05868	8
NUP210	-2.32013	0.686607	0.310116	0.311181	0.713679	-0.689232	0.215581	-0.172262	0.944465	8
HINT3	0.0106941	0.790474	-1.07807	-1.0338	0.161011	-0.912189	-0.196865	0.208429	2.05032	8
NGFR	0.490486	-0.801855	-0.580828	-0.907093	-0.858466	-0.787871	0.496128	1.43837	1.51113	8
MAGT1	-2.31889	0.24588	0.149219	-0.0204062	0.625903	0.24588	0.481453	-0.621294	1.21226	8
DR1	-0.653342	-1.52407	-0.53924	-0.53552	0.545175	0.161909	-0.301338	1.74531	1.10112	8
GIPC3	0.129579	-1.02675	-0.572784	-1.20448	-0.938733	0.385656	0.754155	1.73301	0.740352	8
SYNGR1	-0.873183	-1.07889	0.645684	-0.545576	1.15265	-0.376173	0.627624	-1.07889	1.52675	8
LIN7C	0.0471679	0.337259	-0.0163971	-0.589336	-0.158761	-0.28786	-1.80782	0.497774	1.97797	8
MDK	-0.725077	-0.725077	-0.915136	-1.4994	0.46585	0.23415	0.674444	1.3783	1.11194	8
PPAP2B	-1.9433	-1.05759	0.432608	0.19371	0.729323	-0.311072	1.26691	-0.107539	0.796949	8
PIGS	-1.7285	0.474145	-0.523128	-0.0345113	0.680108	0.474145	0.702018	-1.31276	1.26849	8
ABI1	-0.496735	2.0388	0.030879	0.462021	0.318659	-1.38871	-1.15404	0.0599443	0.129178	8
SYNJ2BP	-1.13187	-0.601432	-0.193453	-0.637655	0.148779	2.00046	-0.202575	-0.601432	1.21918	8
HPCAL1	-0.36519	-0.957038	0.39324	-0.374849	-0.70383	-0.251392	0.238858	-0.403994	2.4242	8
GC	-0.292708	0.280185	0.384721	-2.29527	0.862732	0.275497	0.994927	-0.646967	0.436887	8
GULP1	-0.965127	-0.0218805	-0.271247	-0.131021	2.34909	-0.0052924	-0.382366	-1.04409	0.471936	8
TMOD3	0.793759	0.492104	-0.567073	-1.00756	0.176441	-0.580109	-1.64238	1.17828	1.15654	8
VAPB	-0.260698	-1.14131	-0.678612	-0.311716	0.846436	-0.16703	0.370494	-0.793208	2.13564	8
RAE1	-0.129046	-0.563671	-0.95715	-1.49712	-0.183555	0.544108	0.294037	1.94829	0.544108	8
CHCHD6	-1.25988	-0.0641645	-0.856096	-0.12223	0.571758	-0.0641645	0.21642	-0.631608	2.20997	8
SNW1	-1.59303	-1.75813	0.663797	0.0107577	0.0954581	0.412571	0.531541	1.07215	0.564893	8
ARHGAP26	-0.0753116	-1.3718	1.59154	-0.387549	0.20537	-0.0433894	1.51157	-0.518603	-0.91183	8
RAB35	-0.389698	0.0930203	-0.803047	-1.16024	-0.817883	-0.106225	1.62481	-0.0304908	1.58975	8
SSRP1	-2.27858	0.223027	0.269002	0.11307	0.20294	0.223027	0.795763	1.18686	-0.735105	8
LAMTOR2	0.0490341	-0.224369	-0.20429	0.0328444	0.408312	0.109461	-1.73903	-0.533589	2.10162	8
STX6	-0.0770107	-1.50854	0.489783	-0.882956	0.534823	0.0671372	-0.676776	0.0671372	1.9864	8
RBFOX2	-0.34979	-0.513537	-0.805437	-1.90971	0.812465	1.09848	0.0809648	0.488093	1.09848	8
UBE2H	-1.19033	0.300143	-0.288491	-1.30782	0.197205	0.300143	-0.367571	2.08892	0.2678	8
ATP12A	-0.746809	-0.401372	-0.0329425	0.330506	1.98004	0.0773812	-0.366515	-1.59422	0.753932	8
PPIG	-2.34929	0.319184	0.76518	0.796469	-0.216146	0.319184	-0.170047	0.915113	-0.379643	8
SLC34A2	-1.41331	0.425611	-0.81004	-1.24132	0.69974	0.425611	0.880641	-0.390233	1.4233	8
PNN	-2.37365	0.481364	0.50241	0.328995	-0.151169	0.481364	-0.0511993	1.16895	-0.387068	8
SLC30A7	-1.21045	0.46571	-0.835854	-1.24903	0.318038	0.46571	1.13335	-0.553772	1.46629	8
ITGB4	-2.23576	1.34034	-0.183686	-0.254946	-0.0452566	-0.186774	0.515791	0.170478	0.879822	8
MSI1	-0.72799	1.66367	-0.584778	-1.49509	-0.359548	0.940557	0.940557	-0.467265	0.0898921	8
TOR1AIP1	-2.25464	0.475524	0.157663	-0.277117	-0.112957	1.49487	0.446834	-0.229057	0.298881	8
OTOA	-1.14185	-0.111721	-0.292952	-0.611192	0.353667	1.79318	-0.0220753	-1.18409	1.21704	8
C17ORF75	0.347782	-0.432817	-1.27173	-1.54943	-0.359159	0.384658	0.989507	1.50653	0.384658	8
CTHRC1	-0.324706	-0.0695745	-0.50983	-0.582873	-1.81923	0.677951	0.213786	1.73652	0.677951	8
FOLH1	-0.55816	-0.0955523	-0.435863	-0.684642	0.408475	1.63484	0.167614	-1.64272	1.20601	8
BCLAF1	-2.42727	0.70351	0.217618	0.329729	0.388115	0.70351	-0.451219	0.749958	-0.213954	8
DNAJC5B	-1.47884	-1.11374	-0.37592	-0.933322	1.35668	0.484137	0.850073	0.484137	0.726793	8
MYL1	-0.712814	-1.25634	-1.03201	-0.41981	1.26943	0.765781	-0.217553	0.0461122	1.5572	8
LAMTOR1	-1.56719	0.702567	-0.278321	-1.06337	0.964719	0.702567	-0.118161	-0.717328	1.37452	8
HSD17B7	-1.62285	0.911124	-0.767664	-0.379287	0.432813	0.911124	-0.421708	-0.573232	1.50968	8
ARSE	-1.78073	-0.791325	-0.391339	0.162758	1.14617	0.64191	0.757453	-0.791992	1.0471	8
FGB	-0.731657	-0.530798	-0.642945	-1.33663	0.873936	0.873936	0.73743	1.52408	-0.767352	8
RCC1	-0.153154	-1.41328	0.541279	0.313715	-1.76064	0.880611	-0.229507	0.940369	0.880611	8
SYNPR	-1.16887	-0.459588	-1.86348	0.251742	0.763718	0.791211	-0.123784	0.791211	1.01783	8
SMARCD2	-0.673968	-0.231761	-0.821473	-1.3683	-0.593285	0.947563	1.27376	1.4394	0.0280661	8
PRELP	0.0295592	-0.026953	-1.16404	-1.25906	-1.15149	0.889053	0.376156	1.41772	0.889053	8
AAAS	-1.63754	-0.379006	-0.0714844	-0.615589	-0.954539	1.48449	0.498571	0.727231	0.947869	8
TOM1	-0.907815	-0.963753	-0.804489	-0.462512	0.198452	1.23438	-0.685742	0.699238	1.69224	8
MRPL48	-1.67365	0.873921	-0.193363	0.349751	-1.33166	0.873921	-0.0658282	-0.142221	1.30913	8
NRCAM	-1.40067	-1.41116	-0.322145	-0.0474068	0.587909	0.1529	0.163736	0.448173	1.82867	8
ABCA5	-1.63537	-1.48273	-0.297991	1.25251	0.269976	0.762449	0.451454	-0.0963339	0.776028	8
PRKCI	0.678156	-0.254962	-1.5728	-1.48242	0.678156	0.85588	-0.256517	1.23773	0.116773	8
TMEM66	-2.12213	1.06282	-0.826228	0.332048	0.0492659	1.06282	-0.339235	0.495809	0.284835	8
ATP6AP1	-0.938967	-0.597226	-0.808864	-0.834171	0.1091	1.51478	0.647865	-0.612467	1.51995	8
ATAD1	-1.99789	0.608827	0.496252	0.76154	0.0170534	1.04602	-1.05287	0.608827	-0.487757	8
IMPAD1	-0.412147	-2.12656	-0.13026	-0.342995	0.578289	0.769597	-0.344675	0.769597	1.23915	8
ALG2	1.23184	-1.84202	-0.270188	0.0248905	0.41542	1.23184	-0.502035	-0.863161	0.573414	8
WDR5B	-0.313939	-0.529637	-1.11133	-1.40896	-0.577089	1.1133	0.61293	1.10141	1.1133	8
EPHA7	-1.87675	-0.022382	0.0988561	-0.614413	-0.220974	1.85543	-0.248221	0.57797	0.450487	8
COLGALT2	-0.617149	-0.478374	-1.18307	0.638055	-1.66287	0.779946	0.925795	0.994671	0.602994	8
LMF1	-0.691256	1.09542	-0.717712	-1.11943	0.0331765	1.09542	1.22493	-1.30549	0.384946	8
B3GALT6	-1.77927	1.02803	-0.812036	-0.916892	0.0447808	0.292887	0.0514522	1.02803	1.06301	8
ARFGEF2	1.82159	0.553923	-1.60935	-0.365175	-0.823228	0.258135	-0.447507	-0.204073	0.815685	8
VCAN	-0.405765	-1.49028	1.06167	-1.21517	0.118667	0.946645	1.39408	-0.395911	-0.0139297	8
GOLGA5	-1.29743	-0.891614	-0.474452	-0.454571	0.791918	1.65931	-0.19538	-0.374999	1.23722	8
NDRG4	0.0745864	0.500778	-1.17421	0.15152	-0.88537	1.46318	1.46318	-0.853445	-0.74021	8
SGCE	-0.201809	1.45569	-1.28949	-1.24452	-0.144126	1.45569	0.180958	-0.571764	0.35937	8
SRGAP3	-0.495913	-0.692865	-2.02465	0.244783	0.230703	0.189646	0.59701	1.59431	0.356978	8
DNAJB4	-0.462824	0.532563	-2.19713	0.214921	0.0310963	1.49146	0.502285	-0.325045	0.212675	8
MATN1	0.191798	0.72871	-0.810137	1.13324	-1.73125	-0.228984	-0.940072	0.523458	1.13324	8
INSR	-1.54273	1.54917	-0.450167	-0.477947	-0.251809	0.0329994	-0.551492	1.54917	0.142792	8
MYL4	0.000904741	-1.31661	-0.352063	-1.02609	0.217364	1.55185	1.55185	-0.434712	-0.192481	8
MPZL1	0.0631248	-0.131143	-1.10101	1.20362	-1.70117	1.20362	0.922656	-0.13422	-0.32547	8
SOX9	0.161806	-1.19839	-1.33538	-0.593092	-0.215053	1.46927	0.0510141	0.190564	1.46927	8
WARS2	-0.490869	-1.05113	-0.648108	-0.458688	0.228493	1.60713	1.60713	-0.892255	0.0982915	8
DNAH12	-0.184011	-0.349831	1.35251	-1.83867	-0.639103	1.35251	0.421692	0.267706	-0.382802	8
RFTN2	-0.803715	-0.461432	-0.378932	1.61321	-0.712159	1.61321	-0.327203	-0.989468	0.446484	8
DNAJC16	-0.634293	1.58657	-0.621492	-0.436573	-0.604654	0.650454	-0.890733	1.58657	-0.63585	8
TTN	-0.51732	-0.670668	-0.439815	-0.618034	-0.381257	1.71206	1.71206	-0.835495	0.0384702	8
Average	-0.781665	-0.311674	-0.395666	-0.445989	0.123343	0.377089	0.273919	0.275738	0.884904
	±	±	±	±	±	±	±	±	±		Slope =	0.176513
SD	0.832107	0.904777	0.667152	0.747987	0.757795	0.878929	0.785226	0.897948	0.783411
SCCPDH	-0.11898	-1.12353	0.679855	0.709214	0.629789	-0.354211	0.234861	-1.90414	1.24714	9
MT-CO2	-0.0184162	-1.99417	0.929446	0.728568	0.421577	-0.212683	0.160165	-1.09801	1.08352	9
ATP5I	0.0544877	-1.76678	0.718973	0.684197	0.583887	-0.674705	0.336747	-1.18884	1.25203	9
COX4I1	0.145899	-1.88966	0.819314	0.725146	0.495478	-0.0867087	0.267927	-1.41599	0.938594	9
NDUFA4	0.152996	-1.52306	0.978669	0.876493	0.589245	-1.05617	0.246995	-1.22162	0.956448	9
MPZ	0.32071	-0.718432	0.709225	0.811766	0.35911	-0.481327	0.0112331	-2.14106	1.12877	9
COX6A1	-0.0230185	-1.85621	0.735308	0.860163	0.4271	-0.56232	0.248274	-1.07623	1.24694	9
UQCR10	-0.00529826	-1.64883	0.805245	0.718143	0.625676	-1.26735	0.272022	-0.729689	1.23008	9
UQCRC2	0.0100312	-1.98984	0.741421	0.831928	0.568359	-0.234262	0.20025	-1.15308	1.02519	9
MT-ATP8	0.471086	-0.780177	0.856882	0.779645	0.6355	-1.96469	0.26017	-0.984297	0.725883	9
ATP5F1	0.117939	-1.97482	0.972923	1.01526	0.637696	-0.630466	0.425333	-0.976494	0.412633	9
ATP1B1	-0.214142	-1.83601	0.896416	0.946716	0.409743	-0.154447	-0.0358342	-1.16602	1.15358	9
COX6C	0.250276	-1.14194	0.687545	0.939011	0.600093	-1.72144	0.284644	-0.915833	1.01765	9
ATP5L	0.0697255	-1.58466	0.851517	0.840641	0.714024	-1.4408	0.500651	-0.754861	0.803762	9
ATP5H	0.195409	-1.60125	0.659261	0.6864	0.708404	-0.790838	0.0140525	-1.23116	1.35972	9
COX7A2	0.0221223	-1.49939	0.798906	0.809373	0.888907	-1.49939	0.256865	-0.703834	0.926446	9
CISD1	-0.139715	-1.77393	1.01867	0.924361	0.564387	-0.706787	0.196587	-1.06192	0.978343	9
NDUFS3	0.218299	-1.75017	0.903588	0.868831	0.568075	-1.19894	0.23107	-0.783988	0.94324	9
NDUFA7	0.137168	-1.33331	0.959612	0.907943	0.330338	-1.57189	0.283808	-0.794048	1.08038	9
RAB2A	0.425448	-1.15284	0.532986	0.770431	0.881237	-0.496109	0.167506	-1.96515	0.836496	9
NDUFB6	0.173382	-1.99081	0.815217	0.890377	0.546873	-1.1566	0.465977	-0.447831	0.703413	9
GNAI2	0.0555159	-1.06439	0.698177	0.92072	0.263659	-0.382287	0.228106	-1.94125	1.22175	9
MT-ND3	0.270508	-1.13193	0.822056	1.06353	0.711708	-1.97697	0.490131	-0.400663	0.151635	9
MTCH2	0.274101	-1.96924	0.95009	0.883494	0.579449	-0.401245	0.201282	-1.17884	0.660908	9
NDUFA10	0.0781823	-1.99289	0.919182	0.9638	0.47973	-0.725791	0.0842137	-0.759282	0.952859	9
NDUFA2	0.306262	-0.80105	0.765757	0.706971	0.608769	-0.652232	0.0292544	-2.04984	1.08611	9
ND4L	0.382243	-1.51696	0.967305	0.881008	0.552277	-1.6468	0.0879384	-0.475297	0.768288	9
SLC12A2	0.335116	-1.04808	1.05689	1.20408	0.435634	-1.17843	0.0372777	-1.49074	0.648261	9
NDUFV2	0.144498	-1.71361	0.759863	0.815747	0.61538	-0.174069	-0.12213	-1.4518	1.12613	9
PLP1	0.131142	-0.451008	0.748818	1.08926	0.523416	-1.28573	0.302073	-1.84318	0.785212	9
NDUFC2	-0.0453765	-1.67037	0.836324	0.993226	0.58782	-1.2458	0.444565	-0.793309	0.892928	9
COX7A2L	0.0572485	-1.39494	0.898936	0.917524	0.645635	-0.987558	0.126813	-1.34797	1.08431	9
MT-ND1	0.208169	-1.63045	1.05381	1.14006	0.594713	-1.0349	0.351699	-1.08531	0.402207	9
NDUFB3	0.150464	-1.35047	0.659253	0.919075	0.679956	-1.35047	0.450332	-1.16831	1.01017	9
NDUFB8	-0.152929	-1.46685	0.737723	0.975462	0.567617	-1.48868	0.396614	-0.662148	1.0932	9
NDUFB4	-0.0413682	-2.14233	0.724494	0.819767	0.619082	-0.596703	0.427582	-0.702672	0.892146	9
NDRG3	0.106654	-0.765553	0.6733	0.984232	0.762445	-1.35683	-0.258476	-1.39212	1.24635	9
NDUFS5	0.0422345	-1.69215	0.679969	0.805457	0.729557	-1.1164	0.0711468	-0.790633	1.27082	9
APOO	0.0773266	-1.16486	0.827478	0.934547	0.514909	-1.16486	0.380463	-1.47337	1.06837	9
CD151	-0.00769738	-0.356252	0.916063	0.937116	0.376603	-1.35122	0.0908745	-1.71633	1.11085	9
NDUFA12	0.197376	-1.50423	0.842654	0.771969	0.687186	-1.4771	0.427571	-0.854177	0.908756	9
MARC2L_	-0.066278	-1.47486	0.740664	0.706065	0.551309	-1.80572	0.34656	-0.0403289	1.04259	9
NNT	0.0833066	-1.97852	0.849868	0.922015	0.504282	-0.0265863	0.161332	-1.28062	0.764924	9
BDH1	0.292395	-1.23364	0.945011	1.07407	0.658613	-1.05863	0.213638	-1.52936	0.637902	9
CHCHD2	0.575477	-1.67286	0.660791	0.686529	0.273555	-0.989153	0.0439408	-0.976217	1.39793	9
FAM162A	0.0462271	-0.834639	0.93558	1.0938	0.629446	-1.35306	0.232293	-1.52973	0.780086	9
ETFDH	-0.000298978	-1.6216	0.800502	0.825036	0.585558	-0.831734	0.438626	-1.28182	1.08573	9
FXYD6	-0.276461	-0.665798	0.727865	0.703683	0.575855	-1.38881	0.22386	-1.38881	1.48862	9
NDUFB9	-0.237027	-1.11911	1.07486	0.927326	0.406974	-1.11911	0.344709	-1.3844	1.10578	9
PTRH2	-0.0524922	-2.09332	0.798203	0.659769	0.48493	-0.941521	0.347806	-0.302729	1.09936	9
MPC2	-0.31932	-1.54457	0.921219	1.13004	0.737135	-0.26127	0.418235	-1.54457	0.4631	9
NDUFB5	-0.206029	-1.4133	0.646609	0.910762	0.426358	0.419365	-0.0320566	-1.80262	1.05091	9
SFXN1	-0.0262457	-1.88755	0.758596	0.743947	0.594037	-0.674349	0.498482	-1.06445	1.05753	9
GNA11	0.514158	-0.507499	0.877402	0.794368	0.498937	-2.15259	0.152116	-0.848656	0.671769	9
TOMM70A	-0.466521	-1.78112	0.968305	1.21124	0.662378	-0.563337	0.00174103	-0.86741	0.83472	9
LETM1	0.28181	-1.72219	0.793357	0.789792	0.599982	-1.3748	0.370149	-0.669076	0.93098	9
CPD	0.116369	-0.828381	0.693251	0.79858	0.736605	-1.30364	0.304904	-1.62136	1.10367	9
MTX2	0.202346	-2.21925	0.786683	0.90682	0.488092	-0.904836	0.199039	-0.147662	0.68877	9
SLC25A24	-0.226177	-0.757723	0.973354	0.845057	0.605074	-1.60786	0.332896	-1.23068	1.06605	9
OCIAD1	-0.172874	-0.602426	0.863854	0.94418	0.615538	-0.602426	0.110678	-2.08602	0.929493	9
SLC25A12	-0.255295	-0.816979	0.987457	1.07512	0.654814	-0.682838	0.115756	-1.88937	0.81133	9
GNAS	-0.235311	-0.662815	0.579971	0.785516	0.659253	-1.63551	0.258039	-1.16769	1.41855	9
SLC2A1	0.218765	-0.24902	0.490758	0.730631	0.517869	-1.18994	0.16404	-1.94951	1.26641	9
DHRS7B	-0.215896	-1.51476	0.817164	0.895436	0.792743	-0.373498	0.192359	-1.56331	0.969764	9
OPA1	-0.431589	-0.645576	1.07464	0.938914	0.618868	-0.91304	0.0504969	-1.74304	1.05032	9
PTGES2	-0.177387	-0.23352	0.787388	1.01989	0.571093	-0.23352	-0.00996066	-2.34304	0.619063	9
TIMM23	-0.239141	-1.15317	0.840978	0.784339	0.550349	0.297952	0.0677548	-2.02955	0.88049	9
Average	0.0528595	-1.35808	0.820947	0.879919	0.577921	-0.94219	0.221255	-1.21751	0.964886
	±	±	±	±	±	±	±	±	±		Slope =	0.0174721
SD	0.222357	0.517456	0.129703	0.132475	0.124391	0.559965	0.163014	0.513919	0.254481
VDAC2	-0.192148	-1.59759	0.377671	0.391324	0.404223	1.40972	0.0830578	-1.57248	0.696218	10
ANXA5	-0.808537	-1.49032	-0.0439539	-0.0103071	0.441411	1.29775	0.296345	-1.08737	1.40498	10
RPS27A	-0.700097	-1.88072	0.0352052	0.187241	-0.252362	0.357566	1.15276	-0.401281	1.50168	10
CYB5A	-0.345584	-1.92013	-0.0107833	0.041256	0.457785	0.99593	0.171812	-0.873064	1.48278	10
GNB1	-0.476387	-1.03262	0.272298	0.127097	0.103639	1.54015	-0.458674	-1.45557	1.38006	10
ANXA8	-0.422597	-1.43837	0.409792	0.391839	0.310373	1.14129	0.114564	-1.64818	1.14129	10
ANXA4	-0.694134	-1.7314	0.313951	0.323218	0.487336	0.707681	0.0377259	-1.03049	1.58611	10
RAB6A	-0.0529273	-0.510227	-0.0862593	-0.255976	0.4136	1.27026	-0.0313907	-2.04674	1.29967	10
THY1	-0.490072	-0.579295	-0.287631	-0.0423389	0.0843274	1.60592	0.215236	-1.76622	1.26007	10
VDAC3	-0.219918	-1.36466	0.57048	0.590238	0.482948	1.0301	0.0999392	-1.8992	0.710072	10
TMED7	-0.809017	-1.59068	-0.173468	0.106632	0.913629	1.13369	0.575458	-1.15294	0.996693	10
ERP44	-0.518009	-1.2661	-0.130837	-0.0735645	-0.286349	1.9411	-0.471741	-0.521733	1.32723	10
PCYOX1	-0.641818	-1.64649	0.431362	0.31654	0.579977	1.49117	0.272406	-1.30551	0.502361	10
UQCRFS1	-0.368024	-1.35537	0.186024	0.203254	0.227331	2.05294	-0.0835302	-1.2395	0.37687	10
GNB4	-0.696044	-1.41413	0.456881	0.0679898	0.265182	1.09534	-0.694054	-0.791271	1.71011	10
TMED5	-1.09454	-1.31055	-0.00947956	0.140682	0.789456	0.95714	0.262919	-1.1757	1.44007	10
TM9SF3	-0.593594	-1.0509	0.115248	0.122533	0.863786	0.901765	0.494851	-1.90102	1.04733	10
DAD1	-0.775283	-1.77094	0.00807871	-0.117452	0.833088	1.36149	0.450041	-0.860119	0.871098	10
RTN4	-0.981076	-1.3204	0.136236	0.408462	0.768996	1.86145	0.29758	-0.958328	-0.212924	10
LMAN2L	-1.26261	-1.54879	-0.0451531	-0.0281635	0.513958	0.744837	0.530883	-0.525767	1.62081	10
MLEC	-1.01797	-1.82782	0.0429205	0.181071	0.63989	1.16765	0.300301	-0.635506	1.14946	10
BSG	-0.486166	-1.43503	0.146551	0.731364	-0.474867	0.999374	-0.0976829	-1.05635	1.67281	10
C19ORF70	-0.772919	-1.26192	0.327136	0.552019	0.615267	1.84315	-0.1416	-1.26192	0.1008	10
LRPAP1	-0.182184	-1.14901	0.342192	0.391488	0.726771	1.0811	-0.562541	-1.76491	1.11709	10
SCAMP3	0.109151	-1.22815	0.157316	-0.226672	0.447	1.02721	0.528048	-1.91337	1.09946	10
ZPLD1	-0.568111	-1.32466	0.191424	-0.149511	-0.209828	2.39313	0.0256532	-0.296619	-0.061483	10
TMED2	-0.451624	-1.60082	0.0762123	0.383519	0.931981	0.577196	0.181518	-1.43481	1.33683	10
RPS21	-0.348518	-0.624788	0.0722338	-0.0548922	0.808073	1.29532	-1.09982	-1.42708	1.37947	10
NDUFS4	-0.47964	-0.907336	0.119423	0.302357	0.294811	1.89137	0.0138819	-1.71611	0.481237	10
AHCYL2	-0.648038	-1.52299	-0.148674	0.756243	0.240461	2.06283	-0.148674	-0.575421	-0.0157307	10
PREB	-0.593377	-1.89873	-0.0452298	0.164032	0.680554	1.00787	0.624407	-1.00492	1.0654	10
FAM3C	-0.0389995	-1.1878	0.345217	0.371484	0.750898	1.12777	0.0762917	-2.03489	0.590028	10
SCAMP2	-1.02073	-1.05772	0.0235567	-0.103583	0.526649	0.519127	0.31929	-1.16286	1.95627	10
EPHX1	-0.876503	-1.4779	0.602397	-0.0336906	0.333763	1.89765	0.617402	-0.642871	-0.42024	10
RAC3	-0.687211	-1.74681	0.757898	0.0660937	0.542119	0.523998	-0.841002	-0.219375	1.60429	10
SNTB1	0.0383782	-1.55835	0.681387	0.156404	-0.0603439	2.04803	-0.52371	-0.780378	-0.00142354	10
JAM3	-0.923585	-1.63808	0.110051	-0.0934832	-0.0386446	0.497235	0.845725	-0.543458	1.78424	10
STOML2	-0.650884	-1.61829	0.397181	0.426364	0.468487	1.45441	-0.132812	-1.22251	0.878055	10
PAM16	-0.615242	-1.58943	0.539633	0.556805	0.414009	1.29407	-0.22004	-1.31405	0.934245	10
AMT	-0.412142	-1.23676	0.447018	0.386802	0.745523	1.38746	0.201568	-1.82633	0.306855	10
HHATL	-0.281426	-1.62762	0.622999	0.467908	1.22428	0.732232	0.776523	-1.26823	-0.646676	10
ITGB6	-0.299257	-1.66822	0.65429	0.0948016	0.216697	1.96043	-0.751957	-0.429985	0.223207	10
GGTLC1L	-0.391215	-1.01642	-0.239447	-0.456507	0.625901	0.953766	0.377987	-1.52283	1.66877	10
CD47	-0.716583	-1.77607	0.541067	0.469214	-0.112278	0.47922	0.296694	-0.846357	1.6651	10
ITFG1	-0.394868	-1.90417	0.321526	0.185885	0.301865	1.35893	0.174986	-1.04943	1.00527	10
FLOT2	-0.666175	-1.14853	-0.283128	-0.284357	-0.0198274	2.32375	-0.28867	-0.32898	0.695923	10
LSAMP	-0.182821	-1.78301	0.377647	0.386526	0.0375212	1.12016	-0.244288	-1.10848	1.39674	10
STIM1	-1.31201	-1.50649	0.816199	0.598035	0.400701	0.586197	0.0592619	-0.919471	1.27757	10
PCYOX1L	-0.295083	-1.55962	0.524888	0.860885	-0.0430068	1.63022	0.586405	-0.913868	-0.790824	10
LNPEP	-0.469605	-1.48003	0.012525	-0.0817769	0.719883	1.74999	-0.291126	-1.05562	0.895751	10
PIGU	-0.554611	-1.74191	0.437542	0.339983	1.00035	0.956196	0.850161	-1.30878	0.0210583	10
ITGB5	-1.05704	-1.39464	-0.122049	-0.0443906	0.310243	1.49398	0.198975	-0.779716	1.39463	10
NONE	-0.85791	-1.21098	0.150046	-0.476659	-0.790841	1.4339	0.698505	-0.427759	1.4817	10
MTDH	-0.468248	-1.83819	0.118214	-0.267608	0.194782	0.881028	0.126602	-0.535301	1.78872	10
NCAM1	-0.852317	-1.65016	0.317674	-0.360199	-0.582933	1.34314	0.523158	-0.112985	1.37461	10
EIF5B	-0.300212	-2.14227	0.464773	0.529501	0.117248	1.44216	-0.574138	0.61473	-0.151789	10
CLCA2	-1.07465	-1.81571	0.20878	0.507776	0.0365826	1.13737	-0.323188	-0.0357192	1.35875	10
APLP2	-1.07085	-1.1469	0.865504	-0.608215	0.653398	1.15879	-0.03648	-1.05453	1.23927	10
SDR16C5	-0.262357	-1.76164	0.47975	0.365615	0.895822	0.746047	0.560073	-1.57646	0.553148	10
OGFOD3	-0.332318	-1.83599	0.510467	-0.161793	0.635227	1.0081	0.291471	-1.2239	1.10873	10
KIAA2013	-0.259391	-1.20512	0.338122	0.353504	0.451912	0.821446	0.101323	-1.90881	1.30702	10
FKBP8	-0.444436	-0.866502	0.0386485	0.396332	0.550696	0.924552	0.253507	-2.05537	1.20258	10
LSS	-1.21887	-1.73369	0.466266	0.239847	0.611491	1.07843	0.363296	-0.782638	0.975865	10
C17ORF62	-0.695391	-1.89832	0.551725	0.318851	1.14576	0.840142	0.895136	-0.669805	-0.488093	10
ENDOD1	-1.03121	-1.41214	0.283575	-0.00590209	0.579938	1.02859	0.539504	-1.25143	1.26907	10
MAN2A1	-0.554302	-0.88358	-0.131773	-0.222795	0.59655	1.75612	-0.0372507	-1.53958	1.01661	10
NFS1	0.0301739	-1.45153	-0.299105	0.417767	1.52645	1.40584	-0.441668	-1.0528	-0.135132	10
TM9SF2	-0.210944	-1.1175	0.189234	0.345906	0.574588	0.854915	0.410667	-2.06836	1.02149	10
TMEM87A	-0.386415	-1.19811	0.566973	0.266282	0.584237	1.08867	0.459253	-1.98118	0.60029	10
DNAJC13	-0.395244	-1.46677	0.587049	0.117732	-0.248816	2.10656	0.0837082	0.117732	-0.901949	10
HDGFRP2	-0.793679	-0.897047	0.643312	0.100861	-0.0601086	1.67315	-1.5803	-0.0032345	0.917049	10
NFASC	-0.619106	-1.15817	0.0221454	-0.0759214	-0.618318	2.06583	-0.115262	-0.611247	1.11006	10
ALG5	-0.468438	-1.81599	0.208912	-0.325907	-0.224052	1.21751	0.738041	-0.67282	1.34274	10
KIAA1715	-0.728251	-1.88415	-0.134721	-0.350111	0.740517	1.09624	0.328103	-0.395929	1.32831	10
NEDD4L	-0.613145	-1.87517	-0.0861175	0.083331	0.132976	0.881325	0.72946	-0.741603	1.48894	10
TCIRG1	-0.789034	-1.93196	-0.101773	-0.0907825	0.470514	1.37472	0.261704	-0.345475	1.15208	10
SLC44A1	-1.68078	-1.34135	0.536281	0.557379	0.2764	1.19625	0.244889	-0.665198	0.876132	10
ENDOG	-0.243178	-1.50615	0.222109	0.217443	-1.31279	1.72514	0.419078	-0.302217	0.780565	10
PLXNB2	-0.446759	-1.88002	0.575766	0.630524	-0.406651	1.57896	0.0494217	-0.710484	0.609242	10
ERLEC1	-0.522049	-1.65763	0.525342	-0.566543	0.851998	1.11729	-0.287808	-0.774387	1.31378	10
IGF1R	-0.907894	-1.88898	0.387564	0.0122823	0.0191723	1.71233	0.205133	-0.203742	0.664132	10
RTN4IP1	-0.384461	-1.24816	0.41603	0.494763	1.29444	1.57938	-1.01858	-0.451417	-0.681999	10
LACTB	-0.478598	-0.720027	0.493425	0.703281	0.453792	1.2606	-0.0721759	-2.11801	0.477716	10
UFSP2	-0.27794	-1.27959	0.637825	-0.145296	0.546991	1.69358	-0.999693	-1.00314	0.827262	10
CTAGE5	-0.303864	-1.88635	0.486977	-0.00712334	0.613372	1.21433	0.22163	-1.20745	0.868485	10
QSOX2	-0.769868	-1.38351	0.159938	0.0556013	0.408854	1.6939	0.0243882	-1.19228	1.00297	10
ATP2C1	-1.22795	-0.973452	0.301589	-0.0223825	0.614082	0.757888	0.590523	-1.46099	1.42069	10
IGF2R	-0.624347	-1.51006	-0.112839	-0.0848519	0.433012	1.8396	0.118538	-0.957572	0.898528	10
CPM	-0.484861	-1.03327	-0.0652655	-0.0201409	-0.028838	1.87326	-0.0702735	-1.34292	1.17231	10
SCRIB	0.164255	-1.55487	0.379482	0.164835	-0.760968	2.07205	-0.661804	-0.0663134	0.263333	10
AP3B1	-0.0731821	-1.17888	0.0157276	0.163949	1.0986	1.96341	-0.36309	-0.638318	-0.988221	10
SLC7A14	-0.905032	-1.45913	-0.0470656	-0.426257	-0.0112278	1.68381	0.0925204	-0.314996	1.38738	10
SLC12A4	-0.562452	-0.526127	-0.0610142	-0.00596237	0.182636	2.25103	-0.0618037	-1.49106	0.274752	10
GPR107	-0.962188	-1.52938	0.000788895	-0.295805	0.362242	1.92365	-0.174825	-0.190118	0.865644	10
ANO10	-0.44225	-1.71707	-0.313191	-0.108026	0.570005	1.77544	0.568187	-0.833982	0.500882	10
XRN2	-0.15483	-0.901253	0.363727	0.463999	0.345733	1.23581	-0.0616532	-2.11743	0.825901	10
HEPH	-1.52473	-0.842178	0.196794	-0.0136319	-0.17713	1.96219	0.0416667	-0.521494	0.878513	10
PCSK5	-0.785214	-1.39524	-0.43455	-0.461449	0.298108	1.80955	-0.259764	-0.037437	1.266	10
ABHD6	-0.975455	-1.50834	-0.0741792	0.297194	0.446234	1.94053	0.114565	-0.700236	0.459686	10
RAB27A	-0.246572	-0.959604	0.47612	0.373136	0.290228	1.98095	-0.0103435	-1.59674	-0.307169	10
SLC1A4	-0.704454	-1.8435	0.266445	0.00853755	0.582666	1.75353	0.575386	-0.113344	-0.525264	10
ROR2	-0.877192	-0.91511	0.238824	0.425679	-0.950319	2.24469	0.312726	-0.224221	-0.255076	10
SIRT3	-0.57637	-1.66473	0.297843	0.219452	1.08161	1.69932	0.11482	-0.6186	-0.553343	10
MRPL38	-0.22001	-1.24261	0.543739	0.379742	0.00268792	1.32646	1.32646	-1.38143	-0.735043	10
ATP2C2	-0.758425	-0.860558	0.428821	0.475936	0.225366	1.7532	-0.289234	-1.62559	0.650487	10
TARS2	0.0994827	-1.34686	-0.387728	0.236535	-0.0592381	1.52932	-0.861032	-0.739795	1.52932	10
MANEA	-0.498512	-0.899036	-0.0662482	-0.146701	0.0546157	1.76342	0.19158	-1.55756	1.15844	10
ATL2	-0.886515	-0.905591	0.325429	-0.394877	-0.32223	2.09414	0.235989	-0.961007	0.814657	10
UHRF2	-0.955728	-1.29131	1.30445	-0.337663	0.526298	1.30445	0.585787	-1.13215	-0.00412699	10
HECTD4	-0.944859	-1.43228	1.35986	0.289687	0.293164	1.35986	-0.243542	-1.01018	0.328292	10
SYNE2	-0.684444	-1.49085	0.0944346	0.0871999	-0.207762	2.242	-0.0734882	-0.312732	0.345643	10
LPCAT2	-1.03926	-0.786071	-0.0787728	-0.0208664	0.083607	2.20751	0.546146	-1.04812	0.135825	10
TMCC3	-0.877145	-1.17074	-0.0868953	-0.034949	-0.321953	1.60332	1.60332	-0.776233	0.061271	10
Average	-0.597607	-1.40041	0.238414	0.127902	0.32582	1.40199	0.105807	-0.984879	0.78296
	±	±	±	±	±	±	±	±	±		Slope =	0.129629
SD	0.346703	0.35919	0.320265	0.310957	0.475415	0.479665	0.494626	0.578675	0.689794
ACTB	1.00891	1.58702	-0.997503	-1.07308	-0.580905	1.21973	-0.254826	-0.372857	-0.536485	11
TUBA4A	0.983291	1.40229	-0.755313	-0.882596	-1.10363	0.578655	0.143654	0.835811	-1.20216	11
EEF1A1	1.06398	1.57539	-0.587672	-0.60486	-0.814724	0.99407	-0.325973	0.0818161	-1.38202	11
ARF1	1.16884	1.53122	-0.35663	-0.378777	-0.410565	0.81204	-0.530765	-0.13519	-1.70017	11
GSN	1.11255	1.51034	-0.682074	-0.913531	-0.349397	1.3089	-0.66705	-0.536973	-0.782771	11
EEF2	1.35456	1.71333	-0.503907	-0.399124	-0.967304	0.615421	-0.593627	-0.158989	-1.06036	11
ARPC4	1.16743	1.57272	-0.383242	-0.310436	-0.7823	1.07745	-0.690132	-0.433617	-1.21787	11
FLNB	1.32507	1.72661	-0.757355	-0.838337	-1.25255	-0.00559365	-0.413945	0.441989	-0.225886	11
CIRBP	1.22461	1.41832	-0.757561	-0.642313	-1.5282	0.0869684	0.168322	0.766764	-0.736906	11
ARL1	1.01213	1.50996	-0.823144	-0.898965	-0.210672	0.838519	-0.145982	0.258936	-1.54079	11
PSMB3	1.22105	1.59218	-0.38066	-0.518028	-0.609989	0.983786	-0.483752	-0.478871	-1.32571	11
CA2	1.34637	1.62785	-0.758863	-0.763614	-1.29156	-0.00439298	-0.00439298	0.515396	-0.666798	11
PSMD12	1.34942	1.64942	-0.687568	-0.912507	-0.877549	0.769397	-0.350912	-0.133418	-0.806276	11
PSMD7	1.29839	1.74169	-0.861151	-0.903751	-0.836885	0.660187	-0.451598	-0.0293902	-0.617499	11
SEC23A	1.36124	1.71907	-0.776149	-0.931987	-0.687055	0.115358	0.0255041	0.255478	-1.08146	11
CSRP2	1.42237	1.54238	-0.985774	-0.981973	-1.00243	-0.146078	0.174832	0.538276	-0.561602	11
TRAPPC3	1.16374	1.67634	-0.53118	-0.932303	-0.591816	1.05061	-0.387423	-0.850145	-0.597821	11
DDB1	1.048	1.66352	-0.38761	-0.846167	-0.622498	0.829426	-0.0795815	-0.132378	-1.47271	11
PAPSS1	1.3529	1.76888	-0.456635	-0.710393	-0.965309	0.110057	-0.30179	0.299129	-1.09684	11
SEPHS1	1.33643	1.66446	-0.195635	-0.82588	-0.596846	0.328273	-0.57208	0.23175	-1.37047	11
PRPS1L1	1.28107	1.53405	-0.236082	-0.410539	-0.68015	0.115632	-0.297762	0.433981	-1.7402	11
SNX12	1.17837	1.53389	-0.774361	-1.18368	-0.627396	-0.0159764	-0.500809	1.07167	-0.681711	11
PICALM	1.07532	1.63645	-0.573008	-0.711592	-1.14514	-0.0318538	-0.0459815	0.896827	-1.10102	11
SH3GL1	1.37641	1.74417	-0.800101	-0.871738	-1.06709	0.0249878	-0.288584	0.40667	-0.524718	11
EIF5	1.44136	1.70427	-0.515034	-0.815678	-1.05426	0.138368	-0.592696	0.375296	-0.681629	11
C14ORF166	1.36467	1.513	-0.768735	-0.9201	-0.585531	0.689673	-0.671292	0.377856	-0.999538	11
UCHL5	1.51658	1.5364	-0.474335	-1.45149	-0.644588	0.40488	-0.321836	0.00414111	-0.569756	11
G3BP1	1.2519	1.51697	-0.331051	-0.304481	-1.02582	0.148211	-0.388149	0.645096	-1.51267	11
COPG2	1.3137	1.41919	-0.780577	-0.917926	-1.15416	0.11808	0.021763	0.844803	-0.864869	11
APRT	1.4056	1.44967	-0.79579	-0.708508	-0.959077	0.458015	0.458015	-0.109562	-1.19837	11
RARS	1.25335	1.71146	-0.199795	-0.23195	-0.760403	0.321103	-0.270083	-0.208608	-1.61508	11
OSBP	1.39234	1.77246	-0.821506	-0.834589	-0.933857	0.248306	-0.651621	0.210278	-0.381814	11
SNX1	1.3004	1.77652	-0.30977	-0.971234	-0.433794	0.409377	-0.480803	-0.0563486	-1.23434	11
PITPNA	1.27037	1.84709	-0.305177	-0.727101	-1.1704	0.361854	-0.514175	0.00398648	-0.766446	11
BUB3	1.07015	1.47172	-0.540042	-0.701867	-0.871352	0.415487	0.0687847	0.672996	-1.58588	11
ACLY	1.3685	1.73972	-0.357945	-0.62899	-1.00228	0.436435	-0.268556	-0.152726	-1.13417	11
FARSB	1.15562	1.39861	-0.0824663	-0.124253	-0.949259	0.492973	-0.0486758	0.0384834	-1.88102	11
PPP2R2A	1.39535	1.78533	-0.566453	-0.72145	-1.0593	0.382462	-0.0493551	-0.392341	-0.774249	11
PPCS	1.26473	1.45436	-0.957512	-0.280449	-0.355509	0.549239	-0.90372	0.549239	-1.32038	11
SEC31A	1.34046	1.61463	-0.732529	-0.891991	-1.08947	0.310732	-0.105536	0.436267	-0.882564	11
COPS3	1.11188	1.82015	-0.47931	-0.632866	-0.599705	0.483709	-0.323752	0.0747301	-1.45483	11
DDAH1	1.43108	1.53335	-0.534759	-0.312017	-1.17733	0.398567	0.398567	-0.82235	-0.915118	11
PAIP1	1.04751	1.32758	-0.393668	-0.695041	-0.754761	0.483314	-0.0587651	0.794385	-1.75055	11
SNX3	1.26502	1.47748	-1.1626	-1.05607	-0.27297	0.421265	-0.109581	0.533478	-1.09602	11
PGM2L1	1.37667	1.65695	-0.735064	-0.834129	-0.791761	0.647521	-0.103547	-0.204442	-1.01219	11
EIF4E	1.32061	1.35163	-0.255098	-0.62784	-0.298463	0.589515	-0.763648	0.362224	-1.67894	11
GAS2	0.962907	1.58972	-1.01426	-0.298425	-0.865717	0.269021	0.117991	0.692301	-1.45354	11
UMPS	1.32685	1.49863	-0.493817	-1.01844	-0.729105	0.691568	-0.262137	0.241653	-1.2552	11
PGM3	1.09505	1.40728	-0.836719	-0.742436	-1.06745	0.61392	0.103789	0.682189	-1.25563	11
SEPT9_	1.19788	1.55396	-0.379877	-0.23433	-0.855297	0.622881	-0.230457	-0.00790666	-1.66685	11
FERMT2	1.16051	1.73004	-0.667093	-1.19223	-1.04365	0.644372	-0.221424	0.0740322	-0.48456	11
PRPSAP2	1.33558	1.64036	-0.271926	-0.633634	-0.836134	0.72239	-0.279721	-0.423262	-1.25365	11
PAK2	1.34187	1.51275	-0.440282	-0.745228	-0.896615	0.663817	-0.30642	0.204774	-1.33467	11
EPS8L2	1.19775	1.5752	-0.369303	-1.2423	-1.2332	0.677752	-0.414547	0.246495	-0.437855	11
ATP6V1H	1.1014	1.78074	-0.816225	-1.15151	-0.86551	0.690659	-0.601379	0.0457521	-0.183929	11
DCPS	1.2697	1.58203	-0.64422	-1.02	-0.678313	0.791327	-0.494779	0.219177	-1.02493	11
FAM114A1	1.45504	1.70375	-0.421121	-0.985237	-0.331672	-0.0196288	-0.327348	0.183537	-1.25731	11
USP7	1.12909	1.53298	-0.700665	-0.653655	-1.25433	0.849296	-0.664905	0.469261	-0.707078	11
GCLM	1.30487	1.47761	-0.730699	-0.974087	-0.856731	0.631207	-0.750327	0.631207	-0.733057	11
BZW2	1.33629	1.49761	-0.421414	-0.784281	-0.526253	0.251075	-0.268816	0.501644	-1.58585	11
XPO7	1.20378	1.70407	-0.781595	-0.787796	-0.68593	0.808109	-0.112666	-0.243421	-1.10456	11
ATG3	0.996573	1.72275	-0.799261	-1.16919	-0.825462	0.792539	-0.322961	0.322757	-0.717742	11
ETF1	1.09274	1.26708	-0.415455	-0.713022	-0.582527	0.7739	0.00236425	0.420105	-1.84518	11
NPLOC4	1.2047	1.359	-0.403719	-0.674529	-1.23657	0.851496	-0.0975856	0.310189	-1.31299	11
MTHFD1	1.10483	1.45734	-0.445847	-0.695587	-1.24444	0.872713	-0.0725965	0.280126	-1.25654	11
DDX19A	1.22016	1.39642	-0.378817	-0.620279	-0.963139	0.406615	0.0740531	0.502628	-1.63764	11
AP1S2	0.879291	1.61797	-0.902338	-0.925549	-0.548707	1.12136	-0.666578	0.332654	-0.908104	11
APPL2	1.20646	1.57602	-0.877812	-1.23022	-0.903923	0.608971	-0.0916749	0.375167	-0.66298	11
TXNRD3	1.08897	1.65286	-0.32044	-0.670954	-1.33151	0.9679	-0.509862	-0.142583	-0.734378	11
PPP2R5E	1.12015	1.66016	-0.6966	-1.06847	-0.733592	1.00069	-0.522599	-0.0186451	-0.74111	11
GSPT1	1.14626	1.53864	-0.707135	-0.666462	-0.916771	1.00079	-0.644872	0.270911	-1.02136	11
MARS	1.22522	1.51846	-0.274299	-0.973338	-0.533694	0.989649	-0.415514	-0.242302	-1.29418	11
AHSA1	1.41937	1.58969	-0.584919	-0.805108	-0.976597	0.605009	-0.375427	0.123926	-0.995936	11
YKT6	1.08651	1.64148	-0.557022	-0.752799	-0.557358	1.06465	-0.271447	-0.401317	-1.25269	11
ACTR10	1.17587	1.48646	-0.332902	-0.831504	-0.972834	1.1659	-0.677375	-0.102293	-0.911324	11
PPID	1.21577	1.31	-0.227889	-0.337435	-1.36379	0.998107	-0.433076	0.0979757	-1.25965	11
PSMD5	1.00002	1.60973	-0.374525	-0.499718	-0.961136	1.11652	-0.5752	-0.086885	-1.2288	11
DRG1	1.23766	1.2264	-0.842417	-0.749116	-1.17316	1.16171	-0.170858	0.246522	-0.936734	11
SEC24A	1.19608	1.43252	-0.565902	-0.473748	-1.0795	1.17667	-0.194109	-0.377236	-1.11478	11
SEC23IP	1.27596	1.26666	-0.243611	-0.574475	-0.792961	1.2148	-0.739252	-0.0964803	-1.31065	11
DYNC1LI1	1.18745	1.46041	-0.545671	-0.589955	-1.2201	1.20548	-0.754414	-0.261572	-0.48163	11
IPO7	0.933937	1.40556	-0.698089	-0.684717	-0.854911	1.11169	-0.27397	0.455697	-1.39519	11
EIF4G2	1.14361	1.44725	-0.560823	-0.813783	-0.785073	1.2149	-0.0550542	-0.435101	-1.15593	11
EML4	1.12294	1.37011	-0.625014	-0.422363	-1.26015	1.29414	-0.690492	-0.046848	-0.742314	11
EML1	1.11072	1.3536	-0.121675	-1.11083	-1.15604	1.22906	-0.260917	-0.186307	-0.857618	11
LARS	1.13817	1.42043	-0.415919	-0.645289	-0.956253	1.238	-0.539537	-0.0761574	-1.16344	11
NT5C2	1.12758	1.31253	-0.10371	-0.997625	-0.790222	1.36267	-0.294584	-0.558368	-1.05827	11
Average	1.218	1.55639	-0.564591	-0.758573	-0.861981	0.651475	-0.308506	0.137627	-1.06984
	±	±	±	±	±	±	±	±	±		Slope =	-0.191424
SD	0.135616	0.142314	0.236524	0.262798	0.280287	0.390667	0.279933	0.398953	0.38787
NPM1	0.716767	0.934395	-0.696703	-0.705653	-1.16632	1.43584	-0.875507	1.00852	-0.651339	12
CCT7	1.00785	1.37467	-0.456923	-0.641659	-0.934367	1.53108	-0.771134	-0.402097	-0.707419	12
LTF	0.725696	0.916419	-0.426383	-0.364499	-1.38615	1.73134	-0.684623	0.376667	-0.888466	12
PPP1R7	0.940076	1.14534	-0.572794	-0.318301	-0.356598	1.64237	-0.546773	-0.529235	-1.40409	12
CYFIP1	0.999129	1.18167	-0.163512	-1.06619	-0.746309	1.40555	-0.320284	0.0530621	-1.34311	12
NCKAP1	0.658546	1.17616	-0.163596	-0.77911	-1.22343	1.78004	-0.387123	-0.238684	-0.822803	12
FXR1	0.502865	1.24491	-0.43851	-0.657109	-1.55394	1.49968	-0.741768	0.4896	-0.345728	12
MAP2K1	0.909494	1.42507	-0.486922	-0.471407	-0.663321	1.27176	-0.978138	0.258964	-1.2655	12
MGLL	0.771948	1.45407	-0.345178	-0.49298	-1.14639	1.43588	-0.557624	-0.00589003	-1.11384	12
TPR	0.576341	0.941815	-0.863779	-1.3036	-0.836424	1.39835	-0.172143	1.0289	-0.76946	12
CAPN2	0.886578	1.07687	-0.52038	-0.31986	-0.777288	1.54193	-0.0318401	-0.229389	-1.62662	12
STRN3	0.991678	0.739222	-0.708562	-0.481292	-0.964587	1.57338	-1.49772	0.0581833	0.289699	12
COMMD4	0.91906	0.830099	-0.931913	-0.28083	-0.994613	1.67133	-1.02777	0.483023	-0.668384	12
VPS4B	1.04472	1.13686	-0.75487	-0.865784	-0.394352	1.27731	0.22024	-0.098394	-1.56572	12
WASF2	0.621367	1.20212	-1.30459	-0.630734	-0.55788	1.51598	-0.910817	0.5926	-0.528049	12
LEPREL2	0.387515	0.949981	-0.606824	-0.736515	-0.169363	1.53579	0.037732	0.456323	-1.85464	12
NEK7	0.808458	1.02891	-0.731808	-0.557391	-0.721359	1.5045	0.0668027	0.216314	-1.61443	12
LRBA	0.737612	1.3366	-0.896765	-0.909287	-1.22365	1.53253	-0.147015	-0.0170025	-0.413011	12
PIP4K2A	0.836345	1.09492	-0.395162	-1.385	-0.672087	1.42114	0.444551	-0.195799	-1.14891	12
PPM1H	0.416852	1.1722	-0.412468	-0.512307	-1.47766	1.7764	-0.817854	-0.0961935	-0.0489676	12
RAB12	0.580741	1.12942	-0.384028	-0.522144	-0.769406	1.88144	-0.156752	-0.51688	-1.24238	12
TCERG1	0.752951	1.1716	-0.57341	-0.671118	-1.36872	1.34554	-0.139505	0.591063	-1.1084	12
NMT2	0.985666	1.29822	-0.915109	-0.634181	-1.12632	1.36381	-0.463352	0.307249	-0.815973	12
TLN2	0.841722	1.06863	-0.825702	-1.09887	-1.28539	1.42058	-0.101765	0.528651	-0.547851	12
MAVS	0.981318	0.571633	-0.560441	-0.380393	-1.41615	1.64385	-1.06922	0.547258	-0.317857	12
SRP54	0.744222	1.36769	-0.952597	-0.55519	-0.810715	1.5455	-0.176112	-0.0305077	-1.13229	12
SYN3	0.646204	1.1384	-0.644329	-0.782027	-1.0291	1.56547	0.0640311	0.322679	-1.28133	12
CAD	0.617932	0.974765	-0.329392	-0.519562	-1.30161	1.51647	0.0567218	0.434946	-1.45027	12
PTK2	0.827996	1.25995	-0.71671	-1.01904	-1.08663	1.60021	-0.233132	-0.0172248	-0.615426	12
MAP1B	0.547969	1.09557	-0.812264	-1.18199	-1.03203	1.80807	-0.263742	0.0327801	-0.194357	12
SNX27	0.667968	0.980827	-0.587318	-0.940647	-1.49915	1.72647	0.0586178	-0.0488726	-0.357897	12
DSCR3	0.87458	0.961054	-1.14364	-1.01617	-0.291072	1.6184	0.169496	-0.0615688	-1.11108	12
PPP6R2	0.595077	0.7975	-0.339772	-0.418462	-1.64096	1.80471	-0.0749678	0.1397	-0.862823	12
SNX5	0.985124	1.19666	-0.616349	-0.594789	-0.780629	1.60311	-0.612481	-0.0369478	-1.1437	12
WNK2	0.786683	1.19819	-0.724143	-0.833747	-0.733195	1.73165	-0.46257	0.0246411	-0.987512	12
WDR11	0.755137	1.1698	-0.617162	-0.285214	-0.785664	1.67032	-0.38186	-0.0983328	-1.42702	12
PPL	0.812909	0.857254	-0.697382	-0.708278	-1.27737	1.92352	-0.377062	-0.275951	-0.257633	12
GCN1L1	0.680912	0.910421	-0.384894	-0.577822	-0.927609	1.64172	-0.115047	0.36159	-1.58927	12
EXOC1	0.639071	0.955935	-0.416648	-1.02584	-0.207486	1.81148	-1.39118	-0.432864	0.0675353	12
PTPN23	0.850186	1.14462	-0.362339	-0.653909	-1.15204	1.65124	-0.241956	-0.102044	-1.13375	12
ANKMY2	0.725605	1.05475	-0.446149	-0.557045	-1.13313	1.90916	-0.779196	-0.47671	-0.297284	12
HIP1R	1.00939	0.924795	-0.662593	-1.1266	-0.623	1.79885	-0.64372	-0.0647004	-0.612422	12
DHX29	0.734405	0.581632	-0.391276	-0.806184	-1.08846	1.85772	-0.177255	0.481249	-1.19182	12
UBA6	0.732791	1.03482	-0.339319	-0.496965	-0.906698	1.94577	-0.703387	-0.383968	-0.88304	12
DOCK1	0.603411	0.962587	-0.644555	-0.508769	-0.624786	2.01418	-0.242926	-0.383801	-1.17534	12
MID1	0.654538	1.14733	-0.648237	-0.654569	-0.891495	1.9417	-0.607734	-0.350306	-0.591221	12
CDK5RAP2	0.753957	0.858362	-0.739241	-0.750624	-1.10203	1.94545	-0.172586	-0.0494083	-0.743877	12
Average	0.76271	1.06755	-0.603248	-0.697865	-0.954403	1.63337	-0.402924	0.0776849	-0.882874
	±	±	±	±	±	±	±	±	±		Slope =	-0.113667
SD	0.161584	0.196397	0.237345	0.271202	0.356398	0.192613	0.421527	0.378953	0.490578
GAPDH	1.46829	1.77711	-0.23062	-0.23941	-0.288848	0.178653	-0.950193	-0.649268	-1.06571	13
PPIA	1.60593	1.75793	-0.440955	-0.469792	-0.864167	-0.0793697	-0.997221	-0.120619	-0.391732	13
HSPA8	1.39796	1.86497	-0.295484	-0.268272	-0.795581	0.268256	-0.795581	-0.439729	-0.936536	13
PRDX1	1.54057	1.78969	-0.428162	-0.557984	-0.982216	-0.36935	-0.729518	0.229728	-0.492766	13
PGAM1	1.56036	1.76731	-0.0188553	-0.0885623	-0.865207	-0.18938	-0.708193	-0.52189	-0.935587	13
YWHAQ	1.57296	1.8025	-0.136488	-0.151839	-0.726215	-0.652675	-0.869918	-0.124585	-0.713746	13
HSP90AA1	1.56235	1.88788	-0.332919	-0.436853	-0.605059	-0.214494	-0.519381	-0.434565	-0.906963	13
PKM	1.47864	1.73904	0.0677138	-0.0471985	-0.971213	0.0712533	-0.74623	-0.724861	-0.867144	13
PGK1	1.47789	1.80081	0.0550533	0.020972	-0.802798	-0.326537	-0.667447	-0.496784	-1.06116	13
PMP2	1.56861	1.7768	-0.183648	-0.206881	-0.859347	-0.0670595	-0.570468	-0.433488	-1.02451	13
GDI2	1.46283	1.76191	-0.0994266	-0.0994266	-1.0112	-0.0513293	-0.591796	-0.227474	-1.14408	13
NME1	1.55403	1.78578	0.135618	-0.0504648	-0.69428	-0.641438	-0.800856	-0.572526	-0.715855	13
ARHGDIA	1.50411	1.76163	0.00568461	0.0848059	-0.800101	-0.231913	-0.774205	-0.517609	-1.0324	13
VAT1	1.40412	1.84423	-0.135724	0.034083	-0.106377	-0.450662	-0.61941	-1.17037	-0.799887	13
VCP	1.54543	1.89982	-0.426782	-0.443696	-0.726918	-0.494013	-0.690255	-0.609493	-0.054094	13
DPYSL2	1.42397	1.86602	-0.284471	-0.453838	-0.969644	-0.318521	-0.400687	0.129343	-0.99218	13
IDH1	1.40912	1.78999	-0.180838	-0.264753	-0.797707	-0.135072	-0.383918	-0.0575986	-1.37922	13
DSTN	1.57988	1.80216	-0.385097	-0.410523	-0.735544	-1.00721	-0.589912	-0.169734	-0.0840259	13
ALDOC	1.57273	1.74616	-0.0477027	0.0741525	-0.947869	-0.528171	-0.736431	-0.333821	-0.799048	13
GPX1	1.5296	1.70939	0.211776	0.0795988	-0.784652	-0.744899	-0.913888	-0.330544	-0.756384	13
HSP90AB1	1.56075	1.89516	-0.365867	-0.398038	-0.615827	-0.439166	-0.441438	-0.282784	-0.912791	13
LDHA	1.51631	1.77778	0.0624536	-0.0799566	-0.877991	-0.534742	-0.65097	-0.210292	-1.00259	13
CALB2	1.62138	1.69143	0.0613741	0.0448698	-0.74696	-0.513873	-0.907625	-0.429568	-0.821027	13
CNP	1.45069	1.77569	-0.172239	-0.320936	-0.452225	-0.492563	-0.342089	-0.0161775	-1.43015	13
NMRAL1	1.50209	1.8312	-0.0459484	-0.11584	-0.676137	-0.436031	-0.662978	-0.302459	-1.09389	13
GSTA4	1.51071	1.73945	0.0403538	0.0652662	-0.573246	-0.232752	-0.779153	-0.631597	-1.13903	13
TKT	1.43571	1.70314	-0.0788721	-0.162599	-1.26574	0.165254	-0.44528	-0.312326	-1.03929	13
CAPZA2	1.45542	1.89674	-0.395691	-0.381458	-0.44812	0.079902	-0.760949	-0.448572	-0.99728	13
CBR1	1.50096	1.78759	0.0515749	-0.0350489	-0.327876	-0.659685	-0.781301	-0.440501	-1.09571	13
CCT6A	1.35561	1.83166	-0.497673	-0.703612	-0.575444	0.51296	-0.622148	-0.306804	-0.99455	13
PRDX6	1.50809	1.80523	-0.137799	0.00279418	-0.760273	-0.638797	-0.584251	-0.14672	-1.04827	13
HINT1	1.56793	1.72724	0.0463451	-0.141678	-0.496622	-1.01544	-1.01544	-0.359878	-0.312459	13
MSN	1.47198	1.95209	-0.362172	-0.509803	-0.79144	-0.58903	-0.479158	-0.0389413	-0.653529	13
CCT2	1.39023	1.91678	-0.399434	-0.522782	-0.886708	0.0169299	-0.773858	0.0169299	-0.758087	13
PGM1	1.38015	1.84576	-0.269861	-0.296486	-0.673021	-0.212881	-0.435471	0.0180427	-1.35624	13
ACTR1A	1.37772	1.86771	-0.298394	-0.202659	-0.361718	0.0278612	-0.700363	-0.408425	-1.30173	13
GSTA4	1.47155	1.71222	0.0705785	0.171507	-0.884046	-0.049444	-0.900873	-0.738755	-0.852731	13
AKR7A2	1.42191	1.78997	-0.0317973	-0.134132	-0.384747	-0.147802	-0.534436	-0.576267	-1.4027	13
UBE2N	1.52108	1.86966	-0.346307	-0.357065	-0.367063	-1.04251	-0.57243	-0.0832068	-0.622158	13
TCP1	1.44887	1.94148	-0.435799	-0.529838	-0.813121	-0.277744	-0.372686	-0.0795238	-0.881632	13
CAPZB2	1.49548	1.86128	-0.127361	-0.0449569	-0.866376	-0.333261	-0.749523	-0.400268	-0.835017	13
PLS3	1.48994	1.93916	-0.508405	-0.578921	-0.858196	-0.604674	-0.372157	-0.0844244	-0.422321	13
CLIC4	1.56459	1.71714	-0.0223918	0.0129124	-0.959548	-0.455238	-0.58371	-0.235061	-1.03869	13
FSCN1	1.51974	1.85618	-0.163785	-0.233321	-0.859049	-0.275537	-0.550277	-0.323033	-0.970919	13
EEF1B2	1.57723	1.7011	-0.281585	-0.280779	-0.730858	-1.0923	-0.71166	0.233714	-0.414869	13
CCT4	1.51731	1.86412	-0.19458	-0.329558	-0.886761	-0.320852	-0.537505	-0.182131	-0.930044	13
PSMA2	1.42333	1.79044	-0.153396	-0.161299	-0.900089	0.2595	-0.817777	-0.4607	-0.980006	13
AHNAK	1.4723	1.86324	-0.328538	-0.340412	-0.73594	-0.485786	-1.08689	-0.417571	0.0596006	13
PSMB1	1.39698	1.75666	-0.306471	-0.348961	-0.725604	0.510641	-0.751211	-0.433045	-1.09899	13
ARPC3	1.47531	1.78365	-0.0466727	-0.187608	-0.554485	-0.0578992	-0.83417	-0.369051	-1.20907	13
AKR1E2	1.49252	1.73267	0.142378	0.119992	-0.799825	-0.212065	-0.813716	-0.768897	-0.893055	13
NPEPPS	1.51031	1.76365	-0.0151089	-0.0202342	-1.01689	-0.0567892	-0.647924	-0.766046	-0.750963	13
GLUL	1.5141	1.74788	-0.0517436	-0.242354	-1.06736	-0.701695	-0.543583	0.146291	-0.801545	13
PSMA7	1.34342	1.78409	-0.282621	-0.617198	-1.20422	0.509512	-0.644724	-0.318624	-0.569634	13
PSMA1	1.42354	1.76573	-0.292154	-0.29053	-1.05549	0.0900244	-0.450584	-0.0242735	-1.16626	13
PSMA4	1.50615	1.8199	-0.193761	-0.220107	-0.779798	-0.0151481	-0.9456	-0.316902	-0.854736	13
PPP2CA	1.37068	1.90868	-0.388169	-0.341079	-0.802626	-0.159677	-0.45468	0.0219497	-1.15509	13
AKR1A1	1.48957	1.69744	0.137746	0.0543516	-0.872805	-0.0623891	-0.622636	-0.728941	-1.09234	13
PSMB2	1.59002	1.78686	-0.660957	-0.433873	-0.991504	-0.254646	-0.734075	-0.0471776	-0.254646	13
MAPRE1	1.68037	1.73431	-0.470748	-0.656638	-0.563582	-0.516413	-0.529071	0.11998	-0.798207	13
ATP6V1A	1.50927	1.89651	-0.13682	-0.408504	-0.422112	-1.03551	-0.413399	-0.374459	-0.614972	13
CAPZA1	1.45632	1.92597	-0.3982	-0.286882	-0.28205	-0.30699	-1.1296	-0.501779	-0.476786	13
KARS	1.38936	1.87994	-0.134723	-0.136585	-1.02647	-0.648333	-0.38808	-0.000180771	-0.934932	13
SERPINB6	1.4589	1.73118	-0.0947827	-0.147444	-0.727064	0.0302156	-0.419736	-0.435316	-1.39595	13
AKR1B1	1.39088	1.75947	0.267447	0.282106	-0.707763	-0.582888	-0.672273	-0.9618	-0.775181	13
CAP1	1.53703	1.84534	-0.144534	-0.0226036	-0.581666	-0.482231	-0.545483	-0.64004	-0.965808	13
ARHGDIB	1.52764	1.82879	-0.235403	-0.502624	-0.919794	-0.0128476	-0.653281	-0.193878	-0.838601	13
PYGB	1.41168	1.78159	-0.0858577	0.0068795	-0.488824	-1.29482	-0.211587	-0.213652	-0.905408	13
SELENBP1	1.61089	1.78737	-0.0647841	-0.123607	-0.578854	-0.494949	-0.698415	-0.930529	-0.507117	13
WDR1	1.53042	1.71901	0.0346618	0.195796	-0.840529	-0.641769	-0.745994	-0.946078	-0.305522	13
ALDH1A3	1.52358	1.93115	-0.497604	-0.480332	-0.664572	-0.713896	-0.24733	-0.205866	-0.645128	13
ATP6V1B2	1.49906	1.90519	-0.345619	-0.435429	-0.435919	-0.527335	-1.0794	-0.211911	-0.368644	13
HNMT	1.44351	1.74496	-0.403851	-0.299805	-1.07599	0.0849885	-0.720713	0.177002	-0.9501	13
UGDH	1.5086	1.71258	-0.127314	-0.663389	-0.893463	-0.37404	-0.372496	0.292355	-1.08283	13
PSMD11	1.49073	1.92202	-0.503834	-0.696124	-0.384227	-0.577442	-0.264462	-0.101279	-0.885374	13
NANS	1.57508	1.75812	-0.703917	-0.460989	-0.860457	-0.00792374	-0.321805	-0.0431114	-0.935004	13
BIOC	1.45969	1.72797	0.0554204	-0.0758918	-0.833145	0.158223	-0.594348	-0.972701	-0.925219	13
ACO1	1.51249	1.73392	0.00912938	0.0847983	-1.0688	-0.728674	-0.465433	-0.200871	-0.876562	13
DARS	1.39089	1.85385	-0.259844	-0.567677	-0.944154	0.0831295	-0.528945	0.00268338	-1.02993	13
AHCY	1.52442	1.81279	-0.183276	-0.122131	-0.858431	-0.635638	-0.215131	-0.287425	-1.03518	13
GALE	1.53613	1.78435	-0.584218	-0.61182	-0.797041	-0.714104	0.0754963	-0.764291	0.0754963	13
OTUB1	1.47553	1.77364	-0.17569	-0.417638	-0.530636	-0.184891	-0.695163	0.0473112	-1.29247	13
PSMD4	1.42766	1.93623	-0.290933	-0.511691	-1.03434	-0.348525	-0.68762	-0.0432113	-0.447571	13
HSPA4	1.4326	1.81481	-0.223149	-0.143694	-1.20265	0.054086	-0.565297	-0.324309	-0.842398	13
PSMD6	1.38972	1.92919	-0.663173	-0.625699	-0.238045	-0.286059	-0.396377	-0.0050304	-1.10453	13
PSMC3	1.49683	1.79565	-0.593483	-0.902791	-0.513326	-0.457879	-0.641059	0.391177	-0.575117	13
EFHD1	1.68288	1.71926	-0.475353	-0.289727	-0.92158	-0.230922	-0.885956	-0.166241	-0.432369	13
PDCD6IP	1.43184	1.89457	-0.495574	-0.335309	-0.818421	-0.0508606	-0.587344	-0.0475492	-0.991351	13
TSN	1.35164	1.80785	-0.453644	-0.525104	-0.63273	0.14799	-0.611506	0.17851	-1.263	13
RSU1	1.56769	1.85241	-0.634374	-0.496315	-0.537558	-0.294369	-0.858879	-0.00799169	-0.59061	13
SEPT11_	1.46534	1.82495	-0.642772	-0.223705	-0.735115	-0.302446	-0.67222	0.243167	-0.957205	13
BRD4	1.55147	1.66246	-0.905579	-0.633858	-0.800937	0.128826	-0.737622	0.29779	-0.56255	13
SULT1B1	1.51458	1.71464	-0.366968	-0.602445	-0.424153	-0.129685	-0.236152	-0.0508863	-1.41893	13
PSMD14	1.44754	1.95333	-1.00812	-0.559058	-0.623934	-0.325243	-0.302414	-0.244597	-0.337504	13
SNX6	1.53624	1.79975	-0.234424	-0.512201	-0.722163	-0.167635	-0.536909	-0.0475759	-1.11508	13
USP5	1.53122	1.7623	-0.335933	-0.49949	-0.719652	0.228269	-0.706166	-0.227689	-1.03286	13
UGP2	1.43707	1.77715	-0.206164	-0.519097	-0.940648	0.239033	-0.499255	-0.172974	-1.11511	13
AK1	1.55208	1.6824	-0.947092	-0.321128	-0.504563	0.351407	-0.636261	-0.210841	-0.965994	13
IPO5	1.3251	1.76688	-0.151802	-0.413575	-0.928245	0.249263	-0.360154	-0.123887	-1.36358	13
MVP	1.46634	1.99356	-0.413336	-0.542086	-0.483274	-0.678559	-0.555148	-0.171724	-0.615776	13
SCFD1	1.47477	1.7142	-0.384828	-0.395965	-0.527184	-0.19519	-0.910023	0.365981	-1.14176	13
CFL2	1.44151	1.87137	-0.0724598	-1.18469	-0.354535	-0.0924107	-0.439418	-0.596025	-0.573339	13
LTA4H	1.49804	1.96547	-0.349045	-0.445199	-0.799149	-0.576045	-0.327689	-0.601488	-0.364893	13
PSMD13	1.42682	1.88264	-0.167669	-0.837204	-0.630291	0.103739	-0.637824	-0.234032	-0.906188	13
QARS	1.48778	1.75539	-0.21395	-0.280616	-1.02159	0.185582	-0.79603	-0.207934	-0.908634	13
VPS29	1.48352	1.77015	-0.501095	-0.757041	-0.530521	0.130418	-0.727301	0.130418	-0.998546	13
PITPNB	1.47776	1.76354	-0.267717	-0.507719	-0.697514	0.40866	-0.419624	-0.916843	-0.840538	13
MOB4	1.55543	1.67709	-0.284029	-0.918329	-1.06447	0.0406412	-0.600582	0.161974	-0.567729	13
ANK3	1.46865	1.83392	-0.0264468	0.134051	-0.96672	-0.522176	-0.763971	-0.595992	-0.561312	13
SEPT8_	1.46005	1.72242	-0.476631	-0.591733	-0.735379	0.528261	-0.612253	-0.265711	-1.02903	13
DYNC1LI2	1.32483	1.8934	-0.346359	-0.588779	-0.860145	0.402943	-0.953922	-0.457229	-0.414737	13
ARFIP1	1.5006	1.86543	0.0311849	-0.761495	-0.369905	-0.938302	-0.239235	-0.441967	-0.64631	13
SH3GLB2	1.40547	1.75301	-0.561552	-0.774243	-0.548908	0.610109	-0.66725	-0.310002	-0.906628	13
IQGAP2	1.32994	1.80302	-0.487002	-0.528342	-0.776234	0.668902	-0.605217	-0.528342	-0.876727	13
ANKFY1	1.40953	1.92274	-0.34628	-0.315113	-1.06346	-0.0432517	-0.393898	-0.335767	-0.834494	13
TSG101	1.43862	1.83893	-1.10028	-0.761309	-0.0958486	0.0457271	-0.700888	-0.200375	-0.464574	13
Average	1.48358	1.80775	-0.260125	-0.325039	-0.735254	-0.236393	-0.618784	-0.275353	-0.840378
	±	±	±	±	±	±	±	±	±		Slope =	-0.269563
SD	0.071203	0.0747242	0.251427	0.273714	0.234925	0.394987	0.210387	0.311852	0.31619
PDIA3	0.884279	0.967844	0.387936	0.612219	-1.32794	1.20043	-1.01471	-1.02791	-0.682141	14
MDH2	1.11864	1.00143	0.850924	1.05765	-1.04769	-0.29844	-1.3114	-0.853854	-0.51726	14
AGR3	0.789269	0.487026	0.731945	0.818346	-0.60498	0.482365	-1.90163	-1.23714	0.434797	14
GOT2	0.981855	0.994077	0.874748	1.01855	-1.12391	0.201459	-0.929188	-0.862734	-1.15485	14
ACO2	1.02081	0.958711	0.952471	1.05539	-0.622572	-0.142373	-1.33221	-1.10107	-0.789158	14
PPIB	1.04567	1.29851	0.408601	0.755353	-1.05588	0.400358	-1.43985	-0.967784	-0.444975	14
ALDH2	1.03805	0.949807	1.06879	1.10265	-0.530771	-0.650178	-1.01105	-0.969887	-0.997406	14
IDH2	1.05021	1.01207	0.846166	0.942614	0.0338558	-1.44068	-0.70313	-0.569366	-1.17174	14
CALR	0.866219	0.779711	0.885641	1.14637	-0.689571	-0.683067	-1.59359	-0.99159	0.27987	14
RPS17	1.21581	1.33774	0.342274	0.441063	-0.564862	-0.533155	-0.868625	-1.71564	0.345391	14
RPS7	1.28967	1.33578	0.60222	0.690631	-0.885312	-0.709581	-1.09181	-1.10316	-0.128435	14
PDIA4	0.828215	0.872131	0.544364	0.712838	-0.934671	1.111	-1.10797	-1.43799	-0.587926	14
CS	1.02131	1.04258	1.00439	1.09743	-0.756594	-0.557144	-0.905645	-0.800465	-1.14587	14
GNB2L1	1.27853	1.39542	0.79275	0.399678	-1.28337	-0.287573	-1.07402	-0.630596	-0.590823	14
RPL30	0.464707	0.867861	0.954248	1.00857	-0.0665535	0.440589	-0.912755	-1.00971	-1.74696	14
HSPE1	1.03538	0.592759	0.837924	0.885676	-0.139142	-0.261126	-1.98193	-1.03453	0.0649919	14
P4HA1	1.06283	1.18171	0.450824	0.450824	-0.637668	0.886163	-1.28175	-1.04219	-1.07074	14
ACADL	1.1353	0.811406	0.907829	0.946842	0.261199	-0.754721	-1.27933	-1.0206	-1.00792	14
TST	0.820524	1.06731	0.69704	0.605504	0.073766	0.5954	-1.2536	-1.23902	-1.36692	14
ERP29	1.01502	1.16534	0.294014	0.352577	-1.13434	1.00991	-1.47091	-0.90934	-0.322269	14
ECI1	1.03777	0.87371	0.835358	0.922488	0.425973	-1.44327	-0.870615	-0.861497	-0.919914	14
SRPR	0.724298	1.6141	0.729616	0.626528	0.100255	-0.49292	-0.990136	-1.29683	-1.01491	14
ACAA2	0.948977	0.962616	0.757032	1.0087	-0.305113	0.250683	-1.38511	-1.1632	-1.07458	14
HSPA9	0.811479	0.399363	1.08874	1.16479	0.0614217	-0.0275182	-1.21904	-1.66492	-0.614309	14
PRDX4	0.992175	0.722017	0.622528	0.814753	-0.492834	-0.695748	-1.84275	-0.870321	0.75018	14
ALDH7A1	1.20484	1.36312	0.692289	0.747871	-0.894345	-0.344832	-0.900068	-1.23149	-0.63738	14
HRAS	0.846214	0.688942	0.55845	0.700677	0.252327	-1.81563	-0.435865	-1.43202	0.636898	14
OGDH	0.778505	0.116697	1.26158	1.4798	-0.0835481	-0.576365	-1.01764	-1.37017	-0.588867	14
DLD	0.979753	0.899469	1.07428	1.14022	-0.298338	-0.940888	-0.998944	-0.723906	-1.13165	14
ECHS1	1.06646	0.574832	0.880424	1.04502	-0.225197	0.199517	-1.57048	-1.27383	-0.696751	14
FH	1.03723	0.932232	1.06094	1.02455	-0.550895	-0.307953	-1.1158	-1.23073	-0.849568	14
HYOU1	0.811015	0.652472	0.838893	0.655296	-0.856328	0.912518	-1.01928	-1.76842	-0.226165	14
OXCT1	0.830609	0.812878	0.69517	0.795526	-0.57287	0.988906	-1.13886	-1.09901	-1.31235	14
FEN1	0.587646	1.26419	0.427988	0.56469	1.00266	-0.252963	-1.38547	-1.3557	-0.853041	14
SUCLG1	1.09892	1.17914	0.58674	0.746677	0.0101894	-0.136303	-1.10097	-0.730295	-1.6541	14
SUCLA2	0.752595	0.893204	0.842946	0.80597	0.792176	-1.4337	-0.737116	-0.631241	-1.28483	14
NUCB2	0.917932	0.242885	0.948565	1.03956	-0.793762	-0.635386	-1.25544	-1.32768	0.863316	14
GLUD1	0.960739	0.426637	1.18517	1.22055	-0.144424	-0.572489	-0.854018	-1.58734	-0.634817	14
MANF	1.0919	0.736361	0.746105	0.730912	-0.960403	0.674989	-1.36177	-1.36177	-0.296318	14
C21ORF33	1.03712	0.98929	0.84358	0.700222	0.0193825	-0.761023	-1.93215	-0.569115	-0.327314	14
ETHE1	1.02232	1.09394	0.655262	0.969872	0.338751	-1.27397	-1.06135	-0.843191	-0.901629	14
SOD2	1.03418	0.945406	1.04289	0.996573	-0.606037	-0.189812	-1.08669	-1.27964	-0.85686	14
CTSD	1.22763	1.19555	0.5614	0.446127	-0.396421	0.336856	-1.38516	-1.43346	-0.552513	14
HIBADH	0.924148	0.59957	0.887842	0.992618	0.329579	-0.444496	-1.79512	-1.17603	-0.318104	14
GSTK1	0.987315	0.737482	0.483624	0.508285	1.08159	-0.254453	-1.00128	-0.761554	-1.781	14
GSTZ1	1.24472	1.47786	0.479677	0.474507	0.0459985	-0.457032	-1.15062	-0.91687	-1.19824	14
POFUT1	1.07122	1.45903	0.587896	0.542981	-0.530165	0.0868153	-1.11564	-0.638435	-1.4637	14
HEXA	1.11395	1.2136	0.485167	0.534653	-0.508168	0.602374	-1.13014	-1.46826	-0.843182	14
AK2	1.11746	1.06651	0.965787	-0.00367382	-1.15677	0.431002	-1.3118	-1.19535	0.0868386	14
PLOD2	0.732272	0.960953	0.641141	0.462989	-0.274634	1.01833	-0.657242	-1.76776	-1.11605	14
HSDL2	0.940247	0.845667	0.85056	1.05807	0.0986544	-0.359767	-0.580763	-1.50541	-1.34726	14
ACADS	0.975147	0.642744	1.006	1.12265	-0.166249	-0.0583892	-1.27466	-0.821332	-1.4259	14
PCCA	0.856655	0.356302	1.24243	1.33864	-0.186014	-0.651719	-1.27033	-1.23622	-0.449735	14
PCCB	0.472783	0.516053	1.24543	1.23165	-0.187762	0.155458	-1.1584	-1.61327	-0.661939	14
GPT2	0.653455	0.880405	0.715999	0.597529	1.09662	-0.44444	-1.02783	-0.779289	-1.69244	14
OAT	1.03331	0.913425	1.02732	1.13119	-0.447635	-0.52728	-1.06776	-1.12431	-0.938259	14
MCCC2	0.957738	0.597196	1.04578	1.26274	-0.312834	-0.539718	-1.26165	-1.38798	-0.361273	14
DMD	1.11829	1.38814	0.834763	0.20124	0.367779	-0.794605	-1.2301	-0.824873	-1.06064	14
GRSF1	0.762898	0.499267	1.04147	0.959147	0.238006	0.164497	-1.384	-1.67113	-0.610159	14
HRSP12	1.61637	0.988591	0.407254	0.556688	-0.489971	0.154487	-0.913259	-1.42908	-0.891075	14
NIPSNAP3A	1.03037	0.994132	0.776166	0.965642	-0.688494	0.293224	-1.15442	-1.28962	-0.927003	14
CNPY3	0.714545	0.373428	0.5883	0.672675	-1.81927	0.626286	-0.849117	-1.17355	0.866706	14
NT5DC2	0.744972	0.649218	0.687846	0.576101	1.01682	-0.0121058	-0.771497	-0.993319	-1.89804	14
AGR2	1.13113	0.593241	0.51269	0.170289	0.348766	0.496731	-1.70854	-1.66569	0.12139	14
PITRM1	0.86863	0.775785	0.850795	0.91667	-0.662714	0.667017	-1.29906	-1.42376	-0.69336	14
FAHD2A	1.03002	1.14233	0.62413	0.640242	-1.06291	0.669298	-0.693833	-1.26405	-1.08523	14
IVD	0.838291	0.637736	0.665003	0.728315	0.468011	0.624236	-1.2116	-1.20181	-1.54818	14
ACSS1	0.915885	1.02658	0.787495	0.693773	-1.09227	0.726393	-0.831239	-0.873238	-1.35337	14
MUT	0.663876	0.385985	1.00172	0.919597	-0.0232364	0.760633	-1.21007	-1.69453	-0.803975	14
ABAT	0.883992	0.887403	0.524794	0.635054	0.186996	0.663501	-1.00486	-0.934622	-1.84225	14
PMPCA	0.686919	0.457554	0.969056	0.991058	-0.519803	0.846397	-1.36661	-0.578365	-1.48621	14
CRAT	0.690769	0.643572	0.653314	0.594406	-1.51739	0.700028	-1.29767	-1.16706	0.700028	14
SCP2	1.18656	0.269283	0.474816	0.800768	0.94146	-1.33172	-1.65249	-0.232145	-0.45653	14
ACOT13	0.496639	0.340983	0.598934	1.13155	0.637081	0.683411	-1.39102	-1.0602	-1.43738	14
LAP3	0.563222	0.353587	0.8122	0.932635	-0.50857	1.21203	-1.61324	-1.16192	-0.589947	14
ACSF2	0.535266	0.797278	0.510821	0.757811	0.233434	1.04632	-1.07353	-1.41161	-1.39579	14
MINPP1	0.545353	0.365867	0.838241	0.854117	-1.08665	1.37907	-0.919275	-1.34552	-0.631204	14
GFM1	0.661444	0.540508	0.725173	0.810816	-0.258697	1.01775	-1.66229	-1.43601	-0.39869	14
SIRT5	0.877449	0.927954	0.421269	0.312793	-0.671278	1.39342	-1.33584	-0.785857	-1.13992	14
Average	0.929189	0.848145	0.763822	0.804106	-0.307533	0.0255103	-1.18363	-1.13469	-0.744923
	±	±	±	±	±	±	±	±	±		Slope =	-0.288641
SD	0.212042	0.329	0.22936	0.285004	0.631688	0.75083	0.314613	0.327431	0.645222
ANXA6	-0.60339	-1.71309	0.603841	0.650893	0.428786	0.136028	0.118136	-1.15687	1.53567	15
TMED4	-0.585827	-1.36202	0.417933	0.263147	0.622748	-0.945448	0.525112	-0.778157	1.84251	15
CYB5B	-0.461527	-1.67084	0.456428	0.429895	0.532615	-1.1338	0.468475	-0.275761	1.65452	15
VAMP3	-0.0440444	-0.892331	0.527708	0.275796	0.727322	-0.548086	0.1689	-1.83479	1.61953	15
RPN2	-0.577291	-1.99244	0.431119	0.671612	1.05671	-0.505855	0.623079	-0.646033	0.939094	15
COMT	-0.782027	-1.8619	0.520325	0.341142	0.66211	-0.223935	0.437707	-0.652064	1.55864	15
TMED10	-0.556757	-1.06814	0.306433	0.402308	0.77893	-0.998277	0.604082	-1.18065	1.71207	15
ARL6IP5	-0.266964	-1.20893	0.372376	0.327914	0.787541	-1.69732	0.900556	-0.502262	1.2871	15
RAB7A	-0.178371	-1.09696	0.77604	0.411027	0.343836	-0.968168	0.430296	-1.39396	1.67626	15
LMAN2	-0.24652	-1.87986	0.457951	0.254646	0.731921	-0.37107	0.40086	-0.915759	1.56783	15
RAB14	0.183518	-0.288499	0.247873	0.304088	0.599421	-0.158779	0.281527	-2.39868	1.22953	15
ATP1B3	-0.634625	-1.83768	0.634202	0.708721	0.693537	-0.786108	0.271272	-0.444227	1.39491	15
MGST1	0.214987	-0.916282	0.326099	0.593344	0.929982	-1.63438	0.638924	-1.2382	1.08553	15
CISD2	-0.185346	-0.75756	0.457954	0.480927	0.853556	-2.14159	0.44037	-0.308728	1.16041	15
SUB1	0.00805816	-1.61789	0.111215	0.141227	0.484657	-1.61789	0.301799	1.16886	1.01996	15
ERLIN2	-0.383103	-1.58226	0.293273	0.402653	0.736313	-1.54252	0.671491	0.092465	1.3117	15
LMAN1	-0.54605	-1.87085	0.267293	0.246088	0.764068	-0.565018	0.789407	-0.573217	1.48828	15
HSD17B12	-0.552667	-1.6144	0.67446	0.70909	0.940346	0.0207949	0.740472	-1.52585	0.607754	15
SEC61G	-0.102728	-1.10951	0.230474	0.351983	0.94241	-2.01755	0.811284	-0.0848127	0.978458	15
GLG1	-0.235642	-1.11124	0.588686	0.566119	0.722278	-0.681541	0.270796	-1.63705	1.5176	15
VAPA	0.305751	-0.956679	0.274761	0.0380147	0.709392	-2.13954	0.338601	0.124601	1.3051	15
OSTC	-0.473385	-1.03488	0.614898	0.809939	0.663557	-1.66195	0.57413	-0.74864	1.25633	15
SSR3	-1.58708	-1.46506	0.344597	0.388082	0.617977	-0.600257	1.00438	0.162434	1.13492	15
ANXA7	-0.320144	-1.42507	0.586759	0.839868	0.61638	-1.69158	0.775687	-0.316622	0.934724	15
SFXN3	-0.439709	-2.0004	0.540002	0.559435	0.646351	0.146581	0.573499	-1.1156	1.08984	15
ERGIC1	-0.537912	-1.12273	0.440461	0.547784	0.860421	-1.81468	0.773477	-0.266385	1.11957	15
APMAP	-0.543501	-1.60326	0.468379	0.44116	0.868828	-0.530314	0.399863	-1.05437	1.55322	15
RAB18	-0.234954	-1.09342	0.492547	0.532578	0.641469	-1.82524	0.53441	-0.456613	1.40922	15
ANXA11	-0.322512	-1.51959	0.72165	0.478573	0.620986	-1.50805	0.466529	-0.304014	1.36642	15
EPCAM	-0.122327	-1.29895	0.531375	0.577321	0.435442	0.50682	0.326419	-2.00645	1.05035	15
UGT8	0.0836102	-0.897551	0.806718	0.54089	0.94015	-2.03963	0.70944	-0.657682	0.514051	15
RDH12	-0.823934	-1.52719	0.321389	0.86154	1.11648	-0.900179	0.697924	-0.758199	1.01216	15
ALDH3A1	-0.372905	-1.4572	0.577622	0.483346	0.913692	-1.50039	0.382232	-0.368822	1.34243	15
PGRMC1	-0.446743	-1.43378	0.405544	0.402778	1.07985	-1.58189	0.835881	-0.254636	0.992992	15
PGRMC2	-0.161271	-1.50404	0.571235	0.499633	0.727303	-1.69314	0.502586	-0.152435	1.21013	15
SRPRB	-0.662765	-1.86884	0.565837	0.47532	0.904133	-0.676903	0.733989	-0.62073	1.14996	15
RER1	-0.0729547	-0.838474	0.396413	0.484752	0.678816	-2.03048	0.806374	-0.578257	1.15381	15
TM9SF2	0.225961	-0.870992	0.457613	0.457613	0.671488	-0.642618	0.270192	-1.96876	1.39951	15
SURF4	-0.945011	-1.6356	0.808584	0.723771	0.535911	-0.883514	0.688885	-0.501447	1.20843	15
ATP6V0D1	-0.766938	-1.3425	0.740576	0.539486	1.10854	-1.14081	0.634714	-0.838138	1.06507	15
TMEM258	-0.610294	-1.16997	0.305252	0.743285	0.873072	-1.37892	0.263982	-0.609968	1.58356	15
ILVBL	-0.353442	-1.43385	0.575998	0.720725	0.930378	-1.67556	0.628635	-0.2945	0.901617	15
RAB10	-0.157495	-1.57355	0.552405	-0.137976	1.3892	-1.28436	1.02457	-0.420332	0.60753	15
DHRS7	-0.903264	-1.85764	0.493046	0.547237	0.868326	0.395488	0.484507	-1.02509	0.997387	15
EMC6	-0.262667	-1.25112	0.358294	0.520999	0.608358	-1.25112	0.840033	-1.05207	1.48929	15
ASPH	-0.565129	-1.56607	-0.0094261	0.235914	0.400802	-1.20409	0.849925	0.182958	1.67511	15
TMEM43	-0.624112	-1.91041	0.469991	0.302463	0.688476	-0.606904	0.688476	-0.463164	1.45519	15
GOSR2	-0.481311	-1.54263	0.597723	0.603064	0.620721	-1.4788	0.532003	-0.184367	1.3336	15
REEP5	-0.737862	-1.12338	0.541009	0.70479	1.19082	-1.70578	0.661625	-0.279822	0.748595	15
SCARB2	-0.576738	-0.538651	0.047058	0.557362	0.879849	-1.1007	-0.129707	-1.1007	1.96222	15
SEC11A	-0.0208758	-1.86637	0.557558	0.407051	0.721864	-1.38358	1.0242	-0.166245	0.726403	15
SLC25A22	-0.478652	-0.900806	0.602756	0.528826	0.748668	0.365658	0.349902	-2.15091	0.93456	15
ABHD12	-0.707122	-1.9609	0.506626	0.558446	0.754366	-0.768579	0.737621	-0.265791	1.14534	15
AGPAT3	-0.0198191	-1.70747	0.535062	0.46925	1.10191	-1.05648	0.601698	-0.932235	1.00808	15
FUT8	0.0491579	-0.566187	0.425928	0.32686	0.852238	-1.2498	0.627426	-1.74912	1.2835	15
PON1	-0.448542	-1.61314	0.406268	0.494708	0.81718	-0.186073	0.123577	-1.20885	1.61487	15
METTL7A	-0.513164	-1.64821	0.317085	0.493343	0.643421	0.0694102	0.497717	-1.34397	1.48437	15
NCLN	-0.656106	-1.80256	0.524996	0.673971	0.769728	-1.04468	0.539653	-0.250961	1.24596	15
TM9SF4	-0.0605996	-0.915342	0.423195	0.522948	0.821774	-1.16636	0.343695	-1.49323	1.52392	15
STT3B	-0.646937	-1.92987	0.494605	0.507725	0.890197	-0.770214	0.884871	-0.430639	1.00026	15
CADM1	-0.615379	-1.6716	0.161818	-0.0209407	0.542382	-0.853104	0.536143	0.0530089	1.86767	15
MAL2	0.0564761	-0.917982	0.664957	0.412265	0.900155	-1.4389	0.742038	-1.4389	1.0199	15
EMC7	-1.45883	-1.05408	0.547711	0.386916	0.673657	-1.15941	0.549514	0.0278395	1.48669	15
MMGT1	-0.790706	-1.25355	0.534182	0.491343	0.877527	-0.960443	0.513557	-0.960443	1.54853	15
CASC4	-0.308458	-0.759982	0.512786	0.371158	0.746627	-0.628324	0.478584	-1.88849	1.4761	15
TMX3	-0.574365	-1.8025	-0.0377567	0.480197	1.02356	-0.678737	0.844633	-0.546712	1.29168	15
EMC2	-0.524568	-1.75127	0.32998	0.463851	0.536747	-0.786648	0.689724	-0.576207	1.61839	15
ITGAV	-0.386177	-1.90447	0.299389	0.189914	0.700827	-0.986616	0.477835	0.0595552	1.54974	15
STX12	-0.312551	-0.717358	0.577228	0.569215	0.553947	-1.50814	0.641058	-1.26531	1.46192	15
M6PR	-0.388119	-0.598381	0.272083	0.183219	0.931539	-1.18409	0.605953	-1.4491	1.6269	15
VKORC1L1	-1.34538	-1.01806	0.496142	0.423428	0.890942	-1.01806	0.74335	-0.58688	1.41451	15
SLC27A4	-0.317945	-1.8599	0.409743	0.339985	0.964934	-0.669844	0.718574	-0.835407	1.24986	15
SCAMP1	-0.311919	-0.43226	0.243957	0.389517	0.939145	-0.784659	0.598936	-1.97085	1.32814	15
DNAJC10	-0.186611	-1.06028	0.589551	0.667075	1.11563	-2.10191	0.330463	0.138896	0.507187	15
FAF2	-0.403804	-1.88208	0.540355	0.469562	0.956373	-1.04095	0.725934	-0.409222	1.04383	15
ATP6V0A1	-0.353255	-1.68661	0.137151	0.218434	1.20808	-0.978555	0.763147	-0.583025	1.27463	15
GNAQ	0.109607	-0.897103	0.305259	0.413698	0.481721	-1.54429	0.385519	-1.01922	1.76481	15
KDSR	-0.517303	-1.8201	0.398302	0.328102	0.975741	0.1947	0.75168	-1.2847	0.973585	15
CD81	-0.801314	-0.834623	0.800722	0.163111	0.389931	-0.834623	0.643413	-1.28299	1.75637	15
TSPAN13	-0.22851	-1.53579	0.188453	0.0720377	0.563441	-0.729529	0.397235	-0.729529	2.00219	15
SNAP23	-0.86957	-1.27988	0.771749	0.220269	0.764903	-0.356469	0.738352	-1.35561	1.36626	15
LPGAT1	-1.17029	-0.923442	0.122804	0.431223	0.883093	-0.324283	0.68511	-1.29754	1.59332	15
TMEM35	-0.660546	-1.70113	0.416542	-0.0164383	0.845463	-0.239246	0.609409	-0.866865	1.61281	15
ACSL4	-1.39904	-0.187134	0.0238489	0.196699	0.713499	-1.3597	0.378216	-0.215952	1.84956	15
UBXN4	-0.599948	-1.86292	0.492212	0.239224	0.77172	-0.656322	0.710393	-0.529283	1.43492	15
BCAP29	-0.254295	-0.809075	0.421282	0.797293	0.864349	-0.266133	0.39973	-2.1298	0.976645	15
PIGT	-1.63795	-1.30746	0.26425	0.316259	0.783376	-0.510861	1.11345	-0.160233	1.13917	15
MRPS33	-1.02992	-0.787868	0.605375	0.999542	1.05198	-0.787868	0.238651	-1.39527	1.10537	15
TMEM30A	-0.513413	-1.50702	0.328984	0.471512	0.638474	0.58122	0.707399	-1.70244	0.995279	15
TMCO1	-0.64191	-1.83872	0.697815	0.903419	0.872885	-0.841761	0.90864	-0.58064	0.520274	15
GLT8D1	-0.0953087	-1.09249	0.0648525	-0.112263	0.742979	0.231022	0.632113	-1.87466	1.50375	15
GALNT2	-0.398692	-1.56516	0.324889	0.100139	0.63494	0.612367	0.346322	-1.50662	1.45181	15
GALNT1	-0.402507	-1.02692	0.305774	0.256251	1.07381	-0.0281918	0.524416	-1.9243	1.22166	15
TMX2	-0.321943	-2.03011	0.533745	0.462537	0.55602	-0.0460175	0.462918	-0.965575	1.34843	15
AGPAT4	-1.90498	-0.00212453	0.484002	0.169813	0.776504	-0.904681	0.590056	-0.610583	1.40199	15
CYP2J2L	-0.608012	-1.71232	0.507586	0.308217	0.875283	0.288568	0.632787	-1.38161	1.0895	15
FADS2	-0.906465	-0.159861	-0.0337703	0.249093	0.858523	-0.159861	0.429735	-1.88567	1.60827	15
ACSL3	-1.15312	-1.68309	0.5194	0.56036	0.856825	-0.464538	0.819569	-0.589049	1.13364	15
ZMPSTE24	-0.775657	0.12356	0.514547	0.321806	0.59163	-0.972818	0.50029	-1.7982	1.49484	15
GDPD1	-1.03133	-0.0431691	0.212976	0.032423	0.679996	-0.0431691	0.56768	-1.92424	1.54883	15
SPTLC1	-0.944588	-1.50532	0.448883	0.15723	0.379734	0.294932	0.417828	-1.0257	1.777	15
TMEM120A	-0.381944	-1.76554	0.317197	0.509926	0.642682	0.827122	0.464537	-1.50593	0.891946	15
CYP2D6	-0.378651	-1.88474	0.433153	0.0470775	0.804473	0.292718	0.882984	-1.23487	1.03785	15
Average	-0.497759	-1.31298	0.43538	0.423584	0.775764	-0.831027	0.576661	-0.866154	1.29653
	±	±	±	±	±	±	±	±	±		Slope =	0.12576
SD	0.404378	0.504701	0.186588	0.218929	0.196107	0.700273	0.217264	0.661483	0.322948
KRT78	-0.81609	-1.34379	-0.381119	-0.595569	0.852853	1.79217	0.141163	0.885028	-0.534643	16
HNRNPH3	-0.494037	-1.36699	-0.400849	-0.57067	0.822268	1.72018	0.177196	0.985966	-0.873061	16
TECTA	-0.91124	-1.59753	-0.39588	-0.855887	0.307062	1.55523	0.543427	0.710335	0.64449	16
CTNNB1	-1.14743	-1.68658	-0.587472	0.0324551	0.197696	1.50575	0.309536	0.419938	0.956112	16
TECTB	-0.769897	-1.44822	-0.487917	-0.711409	0.0319555	1.89104	0.14589	0.844709	0.503851	16
NCL	-0.686756	-1.2812	0.739221	0.689967	-0.71351	1.21539	-0.0333062	1.23397	-1.16377	16
OTOL1	-1.27481	-1.55837	-0.138276	-0.424802	-0.0567951	1.38999	0.777729	1.07889	0.206444	16
JUP	-0.326308	-0.908485	0.408463	0.372381	-0.362407	1.31119	0.502923	0.943591	-1.94135	16
U2AF1	-1.04438	-0.829782	-0.0603418	-0.481941	-0.168226	1.65173	0.508886	1.41191	-0.987853	16
TRA2B	-0.885881	-1.70873	0.346866	0.317869	0.320119	1.1809	0.430697	1.0926	-1.09444	16
SNRNP40	-0.79723	-1.85027	0.137428	-0.151148	0.255696	1.32094	0.280756	1.32035	-0.516517	16
SGCD	-1.30677	-1.82127	-0.114207	-0.11244	-0.0425735	1.04581	0.705538	0.853099	0.792808	16
SMARCE1	-0.847689	-0.484535	-0.804261	-0.857805	-0.328647	1.302	-0.242833	1.91912	0.344651	16
ARGLU1	-0.975893	-1.63467	0.292416	-0.198946	0.256736	1.02556	0.497451	1.51179	-0.774442	16
DEK	-0.837459	-1.27495	0.509669	-0.491927	-0.13746	1.00404	0.384711	1.77091	-0.927528	16
WDR18	-0.650533	-1.61167	-0.632789	-0.396457	0.180922	1.37314	-0.0479196	1.56627	0.219031	16
LUC7L3	-0.861898	-1.90912	0.518515	0.378683	-0.558233	1.16297	0.259293	1.19733	-0.187535	16
CHERP	-0.699949	-1.92513	0.170837	0.0624997	-0.338055	1.19096	0.24116	1.46677	-0.169093	16
ENTPD8	-0.764961	-1.82979	0.142952	-0.457063	-0.43623	1.27833	0.209818	1.27833	0.578606	16
SLC44A5	-0.943935	-1.26478	0.429387	0.447368	-0.690264	1.27294	-1.05885	1.27294	0.535199	16
UGGT2	-0.879815	-1.48697	-0.0614964	-0.841904	0.19885	1.9408	0.569675	0.364665	0.196191	16
ABCB6	-0.759718	-1.82636	-0.304639	-0.17461	-0.202249	1.28713	-0.0830284	1.28713	0.77634	16
PLRG1	-0.776266	-1.4032	-0.391859	-0.575986	-0.122069	1.38141	1.05486	1.29978	-0.46667	16
MYO1H	-1.02742	-0.906977	-0.634201	-1.35263	0.0189468	1.02503	0.869216	1.18745	0.820581	16
SORBS2	-0.971954	-1.37802	-0.375688	-0.985471	-0.0918439	1.09495	0.998151	1.29002	0.419858	16
PTX3	-0.393162	-1.49587	-0.107964	-0.906054	-0.514893	1.90298	0.229087	0.573895	0.711982	16
RBM12B	-0.583771	-1.77278	0.169305	-0.202543	-0.168753	1.29989	0.537312	1.40463	-0.683294	16
ZBTB20	-1.33048	-1.6156	-0.118409	0.121014	-0.132119	1.31656	0.268331	1.31855	0.172153	16
SMC3	-0.875289	-1.35622	-0.594366	-0.889692	0.0413984	1.26203	0.718949	1.4403	0.25289	16
KIAA1467	-0.874189	-1.89147	0.0352438	-0.298471	0.0601766	1.30698	-0.0286603	1.30698	0.383414	16
OLFML3	-0.469984	-1.28808	-0.773405	-0.402627	-0.291185	1.38735	1.06841	1.36266	-0.593148	16
SUPT5H	-0.66964	-1.59419	-0.259109	-0.48441	-0.275077	1.77318	0.560109	1.07639	-0.127256	16
AQPEP	-1.46598	-1.07192	0.0474106	-0.316726	-0.281213	1.50223	0.00110331	1.50223	0.0828758	16
PTPRE	-1.05468	-0.889895	-0.360806	-0.782605	-0.39243	1.55773	-0.256956	0.682937	1.49671	16
FAP	-0.934319	-1.14845	-0.608194	-1.08485	0.232501	1.71132	0.614256	0.32614	0.891605	16
SLC39A11	-0.927603	-1.49475	-0.508911	-0.459669	-0.0559774	1.25996	-0.179623	1.25996	1.10661	16
ABCA13	-1.57571	-1.42162	-0.210129	0.310551	-0.374348	1.43477	0.465359	0.672834	0.698288	16
RBM14	-0.915595	-0.913363	0.328414	-0.136683	-0.697729	1.40043	0.725358	1.37045	-1.16129	16
CDH11	-1.08531	-1.67269	-0.111518	0.00257314	-0.325217	1.78177	0.510315	0.631436	0.268645	16
VWA8	-0.82482	-1.7252	0.121634	0.119145	0.400701	1.85649	-0.200039	0.689719	-0.437625	16
WBP4	-0.791387	-0.763865	1.36349	-0.588482	-0.537654	1.36349	0.282308	0.909167	-1.23707	16
NBEA	-0.313531	-1.28197	0.688739	0.0138163	-1.15336	1.43443	-0.415208	1.43443	-0.407344	16
CSGALNACT2	-0.906967	-1.08061	-1.00657	-0.600054	0.174849	1.4219	-0.157543	1.4219	0.733101	16
RBM5	-0.685431	-1.28522	-0.596127	-0.289205	-0.299939	2.11348	0.426005	0.813771	-0.197329	16
PODXL2	-0.646015	-1.75104	-0.533839	-0.262242	-0.023515	1.41262	-0.0218073	1.41262	0.413213	16
DHX30	-0.97667	-1.58031	-0.106982	0.209119	-0.0816585	1.6412	0.728436	0.873628	-0.70676	16
RAP2C	-0.937683	-1.00228	-0.534676	0.000668105	-0.45851	1.62606	-0.534548	1.62606	0.214905	16
BCHE	-0.835811	-0.69161	-0.299914	-0.245094	-0.503945	1.73493	-0.450389	1.73493	-0.443089	16
SLC35A3	-1.04477	-1.00586	-0.525365	-0.536343	0.17653	1.60801	-0.353666	1.60801	0.0734579	16
TRRAP	-0.490915	-1.18196	-0.12824	-1.17367	-0.563696	1.35919	0.630905	1.55076	-0.00236829	16
RAB34	-0.898389	-1.26489	-0.268144	-0.211323	-0.117736	2.18363	0.518184	0.489793	-0.431132	16
DPP4	-0.641422	-0.88296	-0.26404	-0.443215	-0.71423	1.63914	-0.715686	1.63914	0.383268	16
Average	-0.857843	-1.37427	-0.139187	-0.33601	-0.14774	1.4656	0.252163	1.16012	-0.022833
	±	±	±	±	±	±	±	±	±		Slope =	0.225459
SD	0.25897	0.356537	0.452416	0.444337	0.381211	0.278848	0.457344	0.388809	0.71855
RAB1A	0.139451	-0.147571	0.0824998	0.0647496	0.581298	1.11433	-0.244953	-2.38304	0.793237	17
USMG5	-0.126131	0.932609	0.340172	0.86933	0.448101	-0.858865	0.685989	-2.19657	-0.0946404	17
RPL5	-0.783809	0.296648	-0.061835	0.677195	-0.263433	1.87787	-0.404031	-1.71339	0.374783	17
RAB11B	0.282602	0.782459	0.246583	0.109343	0.497141	-1.3516	-0.00817637	-1.86114	1.30279	17
LAMP1	0.00806973	-0.163036	0.00708781	0.119769	0.131837	1.59115	0.31261	-2.2877	0.280213	17
LAMP2	0.361223	-0.0421652	0.3211	0.662866	0.441924	-0.0541563	0.197689	-2.57285	0.68437	17
RTN1	0.212131	1.2682	-0.0572254	-0.131115	0.129653	1.04748	-0.546275	-2.19938	0.276534	17
GNAO1	0.33904	0.986704	0.478675	0.559692	0.101527	-1.13525	0.00554241	-2.11323	0.777301	17
TFRC	-0.56029	0.120641	0.470545	0.446979	0.952985	1.37983	-0.278875	-2.02597	-0.505854	17
CHST5	-0.739748	0.661053	0.349049	0.424595	0.705537	0.661053	0.157316	-2.39249	0.173633	17
NONE	0.142284	-0.0494518	0.58005	0.329973	0.0196089	-0.0494518	-0.235772	-2.26622	1.52898	17
LAMTOR3	0.80903	1.25214	0.0800117	-0.14846	0.37782	-0.349402	-0.349402	-2.24386	0.572125	17
ANPEP	0.434191	0.234986	0.00430051	-0.354286	0.278917	0.771851	0.0493843	-2.43412	1.01478	17
C4BPA	-1.63307	0.29931	0.659352	0.700619	-0.00477461	0.29931	-0.463151	-1.34365	1.48606	17
POMGNT2	-0.933991	0.728013	0.422756	-0.172002	0.838558	0.728013	0.142717	-2.21819	0.464129	17
ASAH1	0.998956	1.15133	0.29719	-0.14512	-0.12719	0.840205	-0.865141	-2.01979	-0.130435	17
AGPAT5	-0.387267	-0.285955	0.409697	0.914995	-0.6063	0.262667	0.292112	-2.04085	1.4409	17
GOLIM4	-0.436769	-0.388464	0.263997	0.840524	0.634699	0.383227	0.139203	-2.34324	0.906818	17
PM20D1	-1.59873	0.423558	-0.0466808	-0.00420205	0.777038	0.423558	0.397607	-1.64415	1.272	17
ATL1	-2.21781	1.07583	0.432332	0.252429	0.328504	0.656831	0.419781	-0.978169	0.030273	17
CYB5R2	-0.929842	0.218569	0.57632	0.485847	0.713625	0.218569	0.230517	-2.30014	0.786532	17
CNTN1	-1.82142	1.05375	0.365652	0.280897	-0.361877	1.05375	-0.235394	-1.16929	0.833929	17
MRPS7	-1.82012	0.431079	0.860818	1.16219	0.274919	0.431079	-0.232723	-1.41417	0.306933	17
GPD2	-1.24926	0.336558	0.526492	0.445311	0.150706	0.77671	-0.230556	-1.94094	1.18498	17
SLC27A1	0.441386	-0.216332	0.469977	0.635382	0.242042	0.66687	-0.404927	-2.46381	0.629414	17
UXS1	-0.902963	0.632043	0.164433	-0.154512	0.229512	0.632043	0.460874	-2.18999	1.12856	17
COMTD1	-2.04445	0.641984	0.436523	0.637008	0.119621	0.641984	-0.194768	-1.19577	0.957866	17
GDAP1	-1.52685	0.534383	0.520175	0.985736	0.0178594	0.534383	-0.811042	-1.38526	1.13061	17
LPCAT3	-1.67098	0.682423	0.299886	-0.189527	0.661045	0.682423	0.214296	-1.65065	0.971087	17
WFS1	-1.17564	1.24773	0.208152	-0.447244	0.0294214	1.02737	-0.0347589	-1.73032	0.875284	17
RHOT2	-1.81676	0.668497	0.550611	0.870335	0.175331	0.668497	-0.593889	-1.31605	0.793425	17
HSD17B11	-1.32645	0.693598	0.206656	-0.160155	0.575911	1.03818	-0.531488	-1.64025	1.14399	17
MAN2A2	-0.925619	0.956777	-0.303542	-0.350116	0.525397	0.956777	0.00464696	-1.92348	1.05916	17
MRPL13	-0.252508	0.724888	0.199806	1.4983	-0.765996	0.724888	-0.724329	-1.82101	0.415955	17
SLC44A2	-0.243233	1.04401	0.309886	0.257814	0.57815	1.04401	0.236538	-1.6352	-1.59197	17
WDFY1	0.14149	1.03086	0.0849576	-0.346299	-0.398938	1.61444	-0.0851758	-2.00398	-0.0373662	17
MFN2	-1.36673	0.764397	0.57908	0.614156	-0.0927175	0.764397	-0.505943	-1.73849	0.981844	17
RAB24	-0.885107	0.741311	0.597451	0.589963	0.0742648	0.741311	-0.966513	-1.87364	0.980964	17
MTCH1	-1.16134	0.56552	0.304229	-0.131705	-0.0770812	1.59785	-0.481151	-1.58117	0.964843	17
ADAM10	-0.79704	1.23335	0.191359	0.240721	-0.116152	1.23335	-0.881948	-1.74083	0.637186	17
NPC1	0.382276	0.910738	0.278839	0.0369857	-0.37332	1.4742	-0.635355	-2.05637	-0.017991	17
SLC7A5	-1.03747	1.04435	0.0697169	0.329601	0.191873	1.04435	-0.703055	-1.82181	0.882449	17
ERMP1	-1.14671	0.876328	0.357643	0.231551	0.361652	0.876328	-0.0173088	-2.12095	0.58147	17
CYP46A1	-1.41003	0.958584	0.291141	0.487659	0.117453	0.958584	-0.172048	-1.85058	0.619233	17
RDH14	-0.480594	1.00836	0.395798	0.406113	-0.205746	1.00836	-0.083902	-2.30219	0.253801	17
MRPL41	-1.41561	0.933456	0.475063	1.10967	0.145752	0.933456	-0.456089	-1.59703	-0.128676	17
SLC26A5	0.141126	0.277837	0.520641	0.73171	0.171299	1.28051	-1.03344	-2.08791	-0.0017659	17
TMTC3	-1.94646	1.01724	0.559975	-0.0771125	0.258787	1.01724	0.164232	-1.28256	0.288663	17
HID1	0.557395	0.00719221	0.353998	0.255377	-0.124973	1.57095	-0.953242	-1.99903	0.332326	17
MRPL22	-0.575743	1.20171	0.245686	0.880911	-0.115955	1.20171	-0.997748	-1.70805	-0.132513	17
AGFG1	-0.553436	0.172064	0.360828	0.141754	-0.69037	2.16561	-0.738417	-1.27576	0.417732	17
ATAD3A	-0.816513	0.957153	0.315434	0.292769	0.124957	0.957153	-0.447452	-2.13101	0.74751	17
SCO1	-0.879039	0.957602	0.651873	0.393697	-0.107873	0.957602	-0.447664	-2.07395	0.547754	17
L2HGDH	-0.502426	1.34461	0.0366224	0.090678	0.544569	1.34461	-0.597775	-1.80584	-0.455054	17
HK2	-0.956242	1.24494	0.615054	0.391721	0.54564	0.592723	-0.657287	-1.97106	0.194509	17
COQ4	-0.408908	1.00008	0.346767	0.437077	0.582889	1.00008	-0.279042	-2.20987	-0.469075	17
PNKD	-1.70519	1.13819	0.129481	-0.16389	0.297678	1.13819	-0.208638	-1.34485	0.719033	17
MRPL19	-0.348282	1.10229	0.723009	0.472141	-0.0172421	1.10229	-0.223791	-1.99822	-0.812198	17
CYP51A1	-1.39819	1.08448	0.316731	0.00725835	-0.363241	1.08448	-0.0852072	-1.59682	0.950501	17
MRPS34	-0.906567	1.25008	0.559649	0.499842	0.245251	1.25008	-0.61246	-1.61295	-0.672917	17
MTX3	-1.74922	1.09435	0.485006	0.487919	-0.08239	1.09435	-0.879051	-0.997017	0.546049	17
NCOR1	0.169697	0.187295	0.0274703	0.00676937	-0.00246876	1.76895	-0.505524	-2.08818	0.435992	17
MIA3	-1.23507	1.58471	-0.0786279	0.164397	0.18242	1.05597	-0.621778	-1.48564	0.433617	17
CYP27A1	-1.14759	1.32551	0.0737678	0.29661	0.133813	1.32551	-0.371323	-1.70729	0.0709793	17
YME1L1	-0.975321	1.24835	-0.0301497	0.0873848	-0.0665976	0.492241	1.24835	-1.91542	-0.0888417	17
Average	-0.728741	0.723842	0.315538	0.322163	0.162344	0.830509	-0.256593	-1.86204	0.492982
	±	±	±	±	±	±	±	±	±		Slope =	-0.0584447
SD	0.780657	0.474965	0.23044	0.40985	0.365628	0.628889	0.448163	0.377579	0.596581
RPL22	0.795795	1.6714	0.357388	0.221754	-0.657875	-1.51293	-0.257755	0.532898	-1.15068	18
RPS14	0.53602	1.1611	0.280243	0.938024	-1.60169	-0.548	0.35226	0.38744	-1.5054	18
RPL7A	0.75807	1.29486	0.429843	0.783818	-0.888234	-2.01145	-0.273207	0.0865493	-0.180251	18
RPS3	1.3243	1.62462	0.273456	0.281135	-1.12522	-1.08954	-0.0643275	-0.261435	-0.962991	18
DYNLL1	1.06356	1.37971	0.312466	0.156729	-0.00260017	-1.83236	-0.279332	0.338777	-1.13695	18
SPTBN1	0.874138	1.47256	-1.02505	-1.53085	-0.430927	-0.849344	0.37556	0.60538	0.50854	18
RPS20	1.01291	1.53521	0.664376	0.529463	-1.61304	-0.835844	-0.412487	-0.576363	-0.304223	18
OC90	0.973262	0.949131	0.563516	0.647993	-1.50076	-1.29635	-1.05806	0.586557	0.134703	18
RPS6	1.36945	1.26369	-0.131729	-0.520106	-1.47358	-0.434601	0.51172	0.558059	-1.1429	18
RPL6	0.73545	1.33219	0.266142	0.858848	-0.933619	-0.991784	-0.503793	0.730808	-1.49424	18
SDOS	0.807401	1.38813	-0.160076	-0.271333	-0.37804	-1.44661	0.398138	1.02928	-1.36689	18
APOA1	0.892484	1.40368	-0.896286	-1.23058	-0.731362	-0.976525	0.359849	1.13838	0.0403579	18
NAP1L1	1.29781	1.51175	-0.379853	-0.510953	-0.063132	-1.53643	-0.393179	0.77962	-0.705639	18
PCBP2	1.1648	1.48952	-0.0961077	-0.387465	-0.434706	-1.35203	0.114172	0.778316	-1.27649	18
AP2A2	0.915343	1.56575	-0.484486	-0.635781	-0.652746	-0.417688	0.311074	0.962883	-1.56435	18
UBE2D3	1.51074	1.63774	-0.368371	-0.2195	-0.226688	-1.41404	-0.510844	0.273019	-0.682054	18
PURA	0.674826	1.67758	-0.489271	-0.837568	-0.21903	-0.933874	0.0347718	1.24291	-1.15035	18
HNRNPAB	1.09568	1.39639	-0.199487	-0.182845	-0.944683	-1.21638	0.208893	1.00479	-1.16236	18
ACTN4	1.146	1.55444	-0.649829	-0.802926	-0.745249	-0.977858	0.3744	0.929868	-0.828849	18
ACTN1	1.0313	1.33596	-0.476093	-0.906217	-0.675329	-1.19022	0.306761	1.27996	-0.706125	18
S100A11	1.37895	1.48012	-0.0240868	0.0197704	-0.625129	-1.5666	-0.991702	0.274506	0.0541743	18
COPB1	1.06432	1.44593	-0.285311	-0.44232	-0.398714	-1.96041	0.374135	0.511563	-0.309193	18
PABPC1	0.840181	1.16832	0.545596	0.636381	-0.584577	-1.82998	-0.0254022	0.416458	-1.16698	18
SFPQ	0.797791	1.23988	-0.263586	-0.507756	-0.993343	-1.3034	0.592184	1.30692	-0.868687	18
ALDH9A1	1.29996	1.56278	0.427845	0.30455	-0.303177	-1.27024	-0.443239	-0.317915	-1.26058	18
RBBP4	0.869484	1.00063	-0.126942	-0.353113	-0.256968	-1.4009	-1.48329	1.28789	0.463206	18
BRT-1	1.63041	1.45676	0.226369	-0.108311	-0.574168	-1.44034	-0.812835	-0.0882512	-0.289643	18
PTBP1	1.05517	1.52332	-0.304165	-0.248835	-0.569059	-1.13715	0.149145	0.919653	-1.38807	18
PFN2	1.46756	1.38227	-0.551058	-0.661743	-0.188649	-1.54205	-0.499738	0.717863	-0.124448	18
COPG1	0.914695	1.24802	-0.120788	-0.372287	-0.441424	-2.04325	0.401161	0.85357	-0.439697	18
LECT2	1.02436	1.27547	-0.396417	-0.379576	-0.762015	-1.27941	0.320836	1.25656	-1.05981	18
AC012493.2	1.77015	1.25201	0.526044	0.0764444	-0.742598	-1.11618	-0.337663	-0.920537	-0.507671	18
AP2B1	0.997582	1.46388	-0.155318	-0.146034	-0.346837	-1.69121	0.20173	0.771606	-1.0954	18
RUVBL1	0.894334	1.34211	-0.660503	-1.03467	-0.218205	-1.6683	0.508108	0.894334	-0.0572145	18
PLOD1	0.616788	1.26285	0.30333	0.143175	-0.735216	-0.739098	0.357147	0.803898	-2.01287	18
GMPPB	1.11414	1.27835	-0.332223	-0.369623	-0.255088	-0.794988	0.3086	0.873526	-1.82269	18
TLN1	0.896482	1.54246	0.552101	0.662222	-0.610233	-1.53776	-0.479991	0.026209	-1.05149	18
NSF	1.24665	1.54398	-0.312116	-0.550588	0.634542	-1.43734	-0.428494	0.27079	-0.967427	18
BTF3L4	1.23309	1.55767	-0.430007	-0.311194	-0.859422	-1.40583	-0.706139	0.718727	0.203115	18
AP2M1	0.796803	1.52323	-1.06992	-1.07699	-0.0998176	-0.35514	0.568387	0.915031	-1.20159	18
GPX7	1.40542	1.56696	0.330424	0.00493898	-0.772449	-1.5958	-0.194602	-0.343625	-0.401276	18
KCC2D	0.816889	1.56931	-0.273071	-0.811775	-0.576136	-1.49326	-0.69754	0.816889	0.648695	18
USO1	1.08192	1.4817	-0.454473	-0.682882	-0.242193	-1.76448	0.0973512	0.817269	-0.334206	18
CAPN11	1.20976	1.57197	-0.182526	-0.824157	-0.541175	-1.64587	-0.204982	0.552148	0.0648303	18
DDX1	0.939808	1.73954	-0.796633	-0.612971	-0.42426	-0.97648	0.202466	0.939808	-1.01127	18
NDRG1	1.04534	1.36321	-0.524267	-0.483717	-0.069415	-2.05999	0.271519	-0.0094683	0.466796	18
CLTB	0.955253	1.1643	-0.16591	-0.82291	-0.514216	-1.21425	-1.2343	1.12423	0.707795	18
NONE	1.11384	1.86878	-0.194831	0.0628446	0.0241114	-1.54521	-0.643868	-0.648805	-0.0368667	18
STXBP1	1.13247	1.44659	-0.257193	0.0056353	-0.0655927	-2.02423	-0.365595	-0.332962	0.460877	18
TCEB3	1.19927	1.2527	0.720212	0.541456	-0.616504	-1.77958	-0.311193	-0.626508	-0.379857	18
SEC13	1.66735	1.3797	-0.51052	-1.0261	-0.484298	-0.639379	-0.522797	0.801824	-0.665784	18
PRKAR2A	1.29684	1.60588	-1.09224	-0.805686	0.242657	-1.35241	0.0302871	0.0904462	-0.0157676	18
FKBP10	1.26511	1.60282	0.111585	0.221175	-0.888215	-0.92391	-0.796754	0.515467	-1.10727	18
DNAJA4	1.09508	1.6674	-0.601391	-0.779477	-0.691599	-0.751364	0.200639	0.91993	-1.05922	18
CDK5	0.928539	1.63325	0.4928	-0.182963	-1.22563	-0.82653	0.167008	0.371115	-1.35759	18
AP1M1	0.92336	1.77147	-0.262535	-0.73952	-0.759159	-0.392018	0.256354	0.668588	-1.46654	18
LEPREL4	0.769025	1.39022	-0.604274	-0.286284	-0.16842	-0.514628	-0.103052	1.27668	-1.75927	18
XPO1	1.23667	1.48453	-0.553808	-0.560839	-1.01795	-0.838075	0.503122	0.773642	-1.0273	18
PDIA5	1.22571	1.5094	0.332656	0.472099	-0.717623	-1.71493	-0.4049	-0.253185	-0.449222	18
PLCD1	1.18008	1.70144	-0.124046	-0.510834	-1.14522	-1.42341	-0.0399231	0.306332	0.0555849	18
GOLPH3	1.54822	1.53572	0.413211	-0.704553	-0.0830303	-0.785523	-0.118127	-0.509997	-1.29593	18
AP1G1	1.02014	1.54895	-0.33152	-0.101763	-0.464227	-0.0435994	0.00268534	0.387344	-2.01801	18
SAR1A	1.15027	1.28412	0.0722831	-0.580802	-0.0299276	-0.0926899	0.329112	0.00481568	-2.13718	18
KTN1	1.33095	1.48928	-0.17535	-0.31861	-0.571487	-1.72801	-0.622534	0.317089	0.278674	18
KIF5B	1.07391	1.91801	0.0386094	-0.153778	-1.22756	-1.14995	-0.47586	0.196622	-0.220004	18
KDELC1	0.886937	1.40685	0.5162	0.463754	-2.03898	-0.518668	-0.341459	0.0766819	-0.451314	18
UPF1	1.16298	1.45985	0.267268	0.131914	-0.748397	-0.571905	-0.273336	0.391579	-1.81996	18
SPTB	0.672999	1.2925	0.0222453	-0.408911	0.459542	-0.195112	0.0742528	0.385784	-2.3033	18
COL2A1	1.13626	1.33809	-0.311458	-0.529904	-1.35814	-0.274015	-0.404861	1.29185	-0.887822	18
Average	1.07766	1.45275	-0.126941	-0.266137	-0.593393	-1.17708	-0.122512	0.495677	-0.740026
	±	±	±	±	±	±	±	±	±		Slope =	-0.184068
SD	0.255163	0.181957	0.441315	0.534754	0.484531	0.515336	0.465236	0.542497	0.73213
TUBB4B	0.817249	0.953761	-0.508553	-0.713192	-0.77187	-1.36575	0.392831	1.67599	-0.480474	19
EPYC	0.524081	0.311741	-0.789447	-1.00776	-0.779679	0.908011	-0.219927	1.93259	-0.879607	19
MBP	0.522953	0.506358	0.125079	-0.121728	-0.608922	-1.74681	0.704279	1.59976	-0.980964	19
HNRNPA3	0.574561	0.419278	-0.433618	-0.370153	-1.10623	0.436428	0.274202	1.78481	-1.57927	19
SNRPD3	0.115532	0.293588	-0.212581	-0.343128	-1.0445	1.34485	0.47718	1.16966	-1.8006	19
RPL17	0.16337	0.00289269	-0.299695	-0.558652	-1.30675	1.19488	-0.0614392	1.8571	-0.991703	19
HNRNPA2B1	0.753445	0.723995	-0.413443	-0.677211	-0.727181	-0.246608	0.354095	1.78026	-1.54735	19
SNRPD1	0.424066	0.357076	-0.124883	-0.128028	0.170358	0.27042	0.726097	0.824963	-2.52007	19
HNRNPK	0.560488	0.848539	-0.289447	-0.286888	-1.12729	-0.225188	0.300246	1.74745	-1.52792	19
RPL10	0.259826	0.0584936	0.59362	0.273989	-0.209216	-0.772225	0.488867	1.43968	-2.13304	19
ILF2	-0.150546	-0.133743	-0.0967892	-0.383567	-0.0531267	0.112848	0.787348	1.85142	-1.93384	19
PAICS	0.154848	0.443313	-0.480302	-0.374834	0.0576147	-1.13729	1.12009	1.66287	-1.44631	19
HNRNPA1	-0.0802442	0.537799	-0.0299331	-0.660969	-1.14834	0.72734	0.492024	1.68796	-1.52564	19
RPS23	-0.246007	0.109262	0.362252	0.443869	-0.366175	-0.204317	0.900495	1.24862	-2.248	19
HNRNPD	-0.343324	0.524966	-0.398725	-0.606679	-0.621942	-0.171288	0.931033	2.0105	-1.32454	19
MATR3	0.354894	0.793539	-0.0171414	-0.164197	-0.408177	-1.47984	0.62631	1.63474	-1.34012	19
HNRNPDL	0.687863	-0.0411364	-0.357221	-0.913283	0.126261	-1.05136	0.578279	2.00792	-1.03732	19
HDGFRP3	0.736619	0.0605092	-0.306453	-1.02368	-0.417668	-1.58747	0.347983	1.836	0.354157	19
SYNCRIP	0.845738	0.977205	-0.278512	-0.261297	-1.30191	-0.650498	0.549337	1.43053	-1.31059	19
ELAVL1	0.487306	0.710317	-0.378314	-0.567222	-0.607048	-0.786179	0.88667	1.70647	-1.452	19
HNRNPL	0.256049	0.57329	-0.476627	-1.0803	-1.22521	0.365369	0.929529	1.65116	-0.99326	19
COL9A2	-0.300328	0.263749	-0.060905	-0.394025	-1.31794	0.263749	0.856577	1.91038	-1.22125	19
NONE	0.740461	0.962346	-0.0842546	-0.234954	-0.4367	-0.39586	0.58292	1.03508	-2.16904	19
ALYREF	0.589807	0.719921	0.195491	0.44606	-0.735241	-0.0687373	0.642507	0.577651	-2.36746	19
SNRPB	0.480735	0.733236	0.320196	0.217411	-0.243173	-1.09749	0.532279	1.12367	-2.06686	19
HNRNPA0	0.421141	0.61324	-0.807022	-0.935529	-0.329587	-0.365495	1.09487	1.64274	-1.33436	19
SNRPA1	0.17814	1.14234	-0.314265	-0.281823	-1.04188	1.09895	-0.0349468	1.02532	-1.77184	19
DDX6	0.694404	0.949392	-0.699695	-0.536732	-0.425541	-0.533089	0.956431	1.27672	-1.68189	19
RBMX	0.569284	0.831131	0.234379	-0.149129	-0.929019	-0.391634	0.717636	1.13775	-2.0204	19
DSP	-0.00639324	-0.509943	0.423345	0.405781	-0.423268	0.979945	0.59	0.826459	-2.28593	19
PSPC1	0.964294	1.05233	-0.237435	-0.955485	-1.28367	-0.0647686	0.387544	1.3299	-1.19271	19
NONO	0.394756	1.03603	-0.422987	-0.499571	-1.58843	-0.132843	0.641073	1.55622	-0.984251	19
HNRNPM	0.852799	0.921769	-0.150903	-0.817691	-0.816534	-0.225509	0.344872	1.50913	-1.61793	19
DHX15	0.105612	0.444952	-0.127536	-0.609805	-0.739847	-0.704486	1.0056	1.91778	-1.29227	19
SF3B14	-0.381236	0.19933	-1.37927	-0.548445	-0.5092	0.869273	0.711589	1.85161	-0.813652	19
Q5F3W7	0.705648	0.755118	-0.380738	-0.669838	-0.113295	-1.01042	0.337288	1.7881	-1.41187	19
HSPBP1	0.833015	0.903053	-1.24985	-1.39896	-0.189625	0.225021	0.334593	1.41714	-0.874385	19
SF3A3	0.602345	1.12844	-0.44142	-0.702983	-1.02408	-0.0513609	0.502823	1.47137	-1.48514	19
CHAD	0.132135	-0.379953	-0.702414	-0.457412	-1.15876	0.146092	1.2874	1.8841	-0.751189	19
SOAT1	-0.806149	0.17213	-1.21411	-0.36541	-0.189995	0.17213	1.50119	1.61551	-0.885293	19
FN1	-1.04896	0.450362	0.126003	-0.201548	-0.644185	-0.559242	1.06766	1.89572	-1.08581	19
COL9A1	-0.318458	-0.306697	0.0115329	-0.366603	-0.854675	0.77178	0.752235	1.84803	-1.53714	19
IGF2BP3	0.324618	0.0142821	-0.0815457	0.462395	-0.186091	0.0583429	-0.0571246	1.66771	-2.20259	19
HNRNPUL1	-1.15074	0.519688	-0.688664	-0.424395	-0.508333	0.519688	1.00185	1.77117	-1.04026	19
BUD31	0.651732	0.343471	0.0814065	-0.395454	-0.0750954	0.153278	0.29056	1.2957	-2.3456	19
RPRD1B	0.678679	0.996495	-0.433883	-0.744305	-1.19361	0.328508	0.293853	1.48323	-1.40897	19
NFIA	0.416391	0.839723	-0.530467	-1.09833	-0.874798	0.461812	0.543507	1.59256	-1.35039	19
SERPINF1	-0.3222	0.564817	-0.513308	-0.928443	-1.01367	0.668719	0.99848	1.65685	-1.11124	19
NCBP2	0.412704	-0.42567	-0.635374	-1.1741	-0.770753	0.412704	0.432108	2.17549	-0.427111	19
NID2	-1.81678	0.749869	-0.245227	-0.444023	-0.775312	0.749869	0.74207	1.42124	-0.381711	19
TUBG2	-0.0407588	0.746933	-0.85423	0.345555	-0.5818	0.345555	0.871296	1.16924	-2.00179	19
CSTF1	-0.239892	-0.233313	0.0899283	-1.9081	-0.622009	0.833052	0.877985	1.51346	-0.311111	19
SMU1	0.432425	0.144025	-1.37622	-0.955696	-0.636011	1.08631	0.809848	1.39261	-0.897287	19
PRPF38A	-1.6943	0.723534	0.340914	-0.13615	-0.250517	0.723534	-0.181258	1.60451	-1.13028	19
COL6A2	-0.518756	0.872759	-0.515125	-0.73651	-1.60487	0.872759	0.723111	1.42548	-0.518845	19
TNPO1	0.777889	0.984193	-0.225953	-0.919986	-1.01349	0.699205	0.358107	1.02404	-1.68401	19
GJA1	-1.8239	0.712475	-0.82466	-0.273174	-0.119004	0.712475	0.906224	1.30776	-0.598196	19
FBN1	-1.05831	0.751998	-0.223093	-0.587913	-1.6542	0.751998	0.627412	1.48806	-0.0959584	19
RNMT	0.693013	1.10467	-1.10045	-0.891453	-1.10495	0.669908	0.653289	1.03608	-1.06011	19
MYEF2	0.0168626	0.612657	-0.493241	-0.250619	-0.701089	1.00588	0.337928	1.40332	-1.9317	19
RBMS1	0.517082	0.59223	-1.39501	-1.35255	-0.272735	1.4228	0.215097	0.980382	-0.707297	19
SEH1L	0.46458	0.50214	-0.591768	-1.44472	-0.275516	0.675541	1.12437	1.03656	-1.4912	19
AC011841.1	0.549601	1.00182	-0.670396	-0.272979	-1.18349	0.890519	0.12287	1.17129	-1.60924	19
PRPF39	-1.46519	0.866955	0.208655	0.266728	-0.264337	0.866955	0.320285	0.96797	-1.76802	19
SRP72	0.437724	1.08912	-0.80324	-1.13041	-1.4057	1.01671	0.123047	1.18728	-0.514529	19
OGN	-0.147449	0.933442	-1.02113	-1.02017	-0.786928	1.09809	0.68698	1.28907	-1.0319	19
NUP93	0.570565	0.68757	-0.721954	-1.38745	-1.00043	1.07295	0.789993	0.989173	-1.00043	19
FBN3	-1.12587	0.751889	-0.121203	-0.427532	-1.73422	0.751889	0.851922	1.2737	-0.22057	19
POLR2B	-0.221846	-0.0784127	-0.170038	-0.050517	-0.682682	1.43901	0.415858	1.25407	-1.90545	19
CCAR1	0.844682	0.787473	-0.306542	-0.848867	-1.83224	0.422048	0.377126	1.28306	-0.726737	19
FMR1	-0.381514	0.101543	0.0298564	0.492843	-0.601463	1.25759	0.244737	1.00034	-2.14394	19
DDX23	-0.377208	0.258008	-0.280608	-0.372185	-0.697228	1.1043	0.705606	1.45944	-1.80012	19
FAM98B	0.668238	1.04515	-0.899063	-1.13803	-0.660967	1.03248	0.306455	0.984357	-1.33862	19
ELAVL4	-1.18804	1.16369	-0.242732	-0.407264	-0.847193	1.16369	0.564007	1.03674	-1.24289	19
RPF2	-0.331016	0.960806	-0.899539	-1.11315	-1.52884	0.960806	0.856433	0.951026	0.143473	19
LAMA1	-0.795401	-0.385492	-0.232411	-0.178209	-1.16339	1.62233	0.660598	1.37611	-0.904132	19
NUP205	0.11491	0.477716	-0.591456	-0.670252	-1.09116	1.30322	0.715353	1.19851	-1.45684	19
POLDIP3	0.313901	0.297062	-0.493601	-1.05374	-0.98961	1.19214	0.72634	1.33249	-1.32498	19
MICU3	0.302313	0.721368	-0.600631	-1.70652	-1.06641	1.22471	0.265753	1.1502	-0.290786	19
PDS5B	-0.255348	-0.136137	-0.531825	-0.882215	-0.776121	1.54235	0.638411	1.50159	-1.10071	19
COL4A2	-1.28512	1.0482	-0.174423	-0.205722	-1.53032	1.0482	0.5116	1.10066	-0.513063	19
IRF2BPL	0.503862	0.750126	-0.789426	-0.9548	-1.15074	1.29415	0.145691	1.24252	-1.04138	19
DIABLO	0.599898	1.03451	-0.187957	-0.646265	-1.53605	0.29821	0.920988	0.920988	-1.40432	19
THOC2	-0.412457	0.373453	-0.657377	-0.722485	-0.566589	1.7677	0.100982	1.33774	-1.22097	19
FUBP3	0.4574	0.333266	-0.735211	-1.71209	-0.569542	1.51551	0.307988	1.04124	-0.638553	19
RPRD1A	0.178611	-0.118225	-0.368746	-1.3169	-1.22774	1.65092	0.85861	0.897967	-0.554495	19
VRK1	-0.831472	-0.143363	-0.249398	-0.3323	-0.892467	1.77135	0.712041	1.13903	-1.17342	19
NUMA1	0.548041	0.28551	0.0794073	-0.866835	-1.72614	-0.798038	0.723088	1.64599	0.108973	19
FRYL	-0.780322	1.22948	-0.473905	-0.660264	-0.897198	1.22948	0.433946	1.12359	-1.20481	19
PRPF4	0.236119	0.396289	-1.1773	-0.831617	-0.68083	1.49881	0.738241	1.01433	-1.19405	19
TUBGCP3	0.481525	0.574462	-0.471546	-0.0732621	-0.334263	1.02798	0.292687	0.806018	-2.3036	19
MAP1A	-0.0827999	0.246391	-0.967094	-1.10203	-0.664603	1.6708	0.912255	0.920131	-0.933044	19
NUP107	-0.0334114	1.93863	-0.896157	-1.04555	-1.11062	0.487368	0.520347	0.614149	-0.474764	19
CNOT1	0.865169	1.21012	-0.190994	-0.435734	-1.4925	0.523697	0.293025	0.77	-1.54278	19
Average	0.0797899	0.552476	-0.399963	-0.587716	-0.802101	0.435757	0.583081	1.3788	-1.24012
	±	±	±	±	±	±	±	±	±		Slope =	0.00314805
SD	0.664739	0.452251	0.418448	0.503393	0.461747	0.839453	0.323703	0.354196	0.612702
RPS8	0.844804	0.927818	0.276397	0.428735	-0.88425	-1.95859	0.0766966	1.01016	-0.721773	20
RPL14	0.553617	0.594222	0.381357	0.153109	-0.393993	-2.34899	0.381357	1.08879	-0.409462	20
RPS13	0.0855829	0.428982	0.4886	0.462419	0.316212	-2.64554	0.294007	0.350062	0.21967	20
RPL27	0.18637	0.698355	0.314824	0.531849	0.236872	-2.61525	0.0451169	0.209362	0.392505	20
RPL36	0.330279	0.467571	0.30602	0.451629	-0.0921267	-2.58349	0.223022	0.794714	0.102376	20
RPS15A	0.242157	0.929826	-0.0864529	0.0994627	-0.354443	-2.14284	0.835793	1.11288	-0.636388	20
RPL35	0.0767296	0.602152	0.543741	0.632155	-0.234122	-2.406	-0.497383	0.535286	0.747443	20
RPLP2	0.645098	0.454951	0.589857	0.397789	0.285906	-2.34589	-0.853835	0.0848286	0.741298	20
RPL10A	0.763597	0.960922	0.355294	0.552645	0.0224211	-2.4577	-0.011514	-0.136197	-0.0494718	20
RPL7	0.308404	0.701956	0.713344	0.560662	-0.485713	-2.23328	-0.304289	1.07653	-0.337619	20
RPL4	0.474929	0.754618	0.481702	0.279632	-0.653276	-2.19939	0.310741	1.10688	-0.555835	20
RPL23	0.429081	0.623747	0.280673	0.172583	-0.397154	-1.61566	0.606005	1.3957	-1.49498	20
RAC1	0.571092	0.874169	0.305758	0.314704	0.223744	-2.57275	0.185997	0.114753	-0.0174697	20
RPS25	0.872179	0.749722	0.360828	0.424279	-0.0633386	-2.5088	-0.100981	0.241068	0.0250407	20
RPL27A	0.671681	0.967035	0.445791	0.751524	-0.589111	-1.86696	-1.08989	0.892417	-0.182484	20
RPS16	0.511373	0.448529	0.500107	0.581968	0.0528047	-2.48559	0.817048	-0.280761	-0.145474	20
ANP32A	0.186687	0.507949	0.267104	0.150226	0.379642	-2.36435	0.21711	1.22695	-0.57132	20
RPS11	0.312753	0.588532	0.185583	0.27226	-0.978737	-2.1331	0.501846	1.29812	-0.0472489	20
RPL24	0.198114	0.308166	-0.0222053	0.0806012	0.0594003	-2.43025	0.771153	1.15737	-0.12235	20
RPS4X	0.753813	1.13892	0.366344	0.372546	-0.508661	-2.18183	0.484136	0.296152	-0.721419	20
RPL21	-0.246248	1.01962	0.382903	0.128202	0.43281	-2.26265	0.307461	0.927327	-0.689433	20
RPL13	0.478676	0.366649	0.62081	0.613817	-0.0714087	-2.53274	-0.0986902	0.665455	-0.0425665	20
HNRNPR	0.318615	0.014532	0.435634	0.463628	-0.478863	-2.13509	0.86633	1.21217	-0.696954	20
RPL19	-0.0611436	0.229686	0.453252	-0.0717129	-0.432721	-2.33124	0.387168	1.29588	0.530834	20
HMGB3	0.501907	0.751553	0.0770894	-0.590397	0.216711	-2.29452	0.775698	0.896347	-0.334389	20
COPA	0.22806	0.240513	-0.183389	-0.127873	0.336593	-2.47548	0.673322	0.27351	1.03474	20
CTNNA1	0.0203196	-0.0574278	0.0960863	-0.076703	0.379553	-2.42208	0.221144	0.579988	1.25912	20
RPS24	0.279541	0.971744	0.124136	0.36877	-0.050988	-2.47893	-0.0310355	0.823097	-0.00633815	20
ATP6V0C	0.239274	-0.143176	0.470908	0.406256	1.18967	-2.1424	0.747752	0.197231	-0.96551	20
RPL26	-0.438803	0.399913	0.578379	0.524036	0.4964	-2.51455	0.418371	-0.00589015	0.542147	20
RPS26	-0.0528024	0.440474	0.0687096	0.169985	-0.322223	-1.80391	0.425215	1.88885	-0.814308	20
DDX17	0.346781	0.585566	-0.126373	-0.0621429	-0.538001	-1.92367	0.903287	1.49801	-0.683455	20
RPL18A	0.627673	0.965967	0.0416097	0.235041	-0.29799	-2.24149	0.457471	0.903104	-0.691388	20
DDX3X	0.236288	0.382918	0.150185	0.152825	0.0487815	-2.39831	0.668267	1.1741	-0.415049	20
DCN	-0.279949	-0.347181	0.101043	0.311566	0.346711	-2.40169	0.630232	0.999471	0.639798	20
RPL15	0.771106	0.338165	0.682146	0.387792	0.459098	-1.72206	0.0826936	0.723904	-1.72284	20
RPL31	0.0424095	0.325099	0.17574	0.68235	0.505985	-2.19566	0.464338	-1.02567	1.02541	20
MAGOH	0.532357	0.163562	0.404892	-0.27267	-0.0825299	-2.25367	0.737917	1.25818	-0.488039	20
ASNA1	0.953243	0.529166	-0.00759031	-0.00115263	0.786386	-2.33147	-0.116799	-0.508279	0.696495	20
PRPF19	0.973454	-0.0818608	0.386554	-0.486479	0.548391	-1.91139	-0.124276	1.45417	-0.75856	20
LRRC59	0.442371	-0.283318	0.0499011	0.329949	0.253671	-2.43561	0.582558	1.12792	-0.0674394	20
EIF3K	0.0170606	0.0514928	0.220012	0.426967	1.77496	-1.98915	-0.367214	-0.574657	0.440535	20
RAB21	0.498858	0.436594	0.658726	0.439364	0.317698	-2.46024	-0.120102	-0.493378	0.722484	20
CTNND1	0.00741442	-0.838721	0.685119	0.414671	0.119837	-1.98887	0.470125	1.52052	-0.390093	20
EIF3D	0.126227	0.348681	0.535888	-0.108252	-0.333937	-2.46943	0.599218	0.922686	0.37892	20
TRAP1	-0.569522	1.07502	1.02916	-0.381659	0.936188	-2.04904	-0.245576	-0.179008	0.384434	20
EIF3L	0.805784	0.76028	0.274324	0.535289	0.839511	-1.54071	0.571832	-0.632043	-1.61427	20
HDAC1	-0.146812	0.223531	0.137347	-0.055515	-0.0269554	-1.82932	1.46144	1.2126	-0.976317	20
EIF3A	0.330539	0.234742	0.78852	0.593014	0.540247	-2.53435	0.124529	0.215288	-0.29253	20
ACAA1	0.0447891	0.139948	0.613872	0.559643	0.808567	-2.08142	0.363903	0.792434	-1.24174	20
ACSL1	0.488922	0.593814	0.365765	0.287138	0.519318	-2.61066	0.320059	0.0615397	-0.0258997	20
EIF3E	0.074436	0.571068	0.623541	0.372397	0.925526	-2.38583	0.233642	-0.682508	0.267726	20
NAPB	-0.117269	0.454274	0.773774	0.585817	1.26666	-2.10894	-0.607813	-0.562612	0.316111	20
LEPRE1	0.72427	1.33242	0.580056	0.59856	0.277254	-1.95316	-0.138732	-0.916798	-0.503875	20
EPB41L2	0.521905	0.632595	0.505801	0.359376	-0.373333	-2.54786	0.179818	0.457632	0.264065	20
PRPF8	-0.2049	-0.642252	0.439536	0.31671	0.261076	-2.22242	0.835077	1.24365	-0.0264702	20
EIF3B	0.950539	0.874904	0.499665	0.0104039	-0.0678007	-2.43974	0.180419	0.209985	-0.21838	20
EIF3M	0.483046	0.618412	0.481927	0.717718	0.81847	-2.31597	0.137833	-0.205093	-0.736348	20
EPHX2	0.873602	0.868659	0.71526	0.59096	0.685286	-1.67204	-0.0767278	-0.556561	-1.42844	20
AP3D1	0.169775	-0.710414	0.638365	0.182837	0.367577	-2.18693	0.7407	1.18665	-0.388559	20
THRAP3	-0.873486	0.265056	0.509809	0.388738	0.524329	-2.34169	0.421062	0.875737	0.230444	20
MST4	0.652861	0.761057	0.144613	-0.709982	0.22059	-2.14364	0.187298	1.27939	-0.392181	20
CRTAP	0.340442	-0.10546	0.425854	0.380274	1.26047	-1.86429	0.0917653	0.81581	-1.34487	20
STAU2	0.115167	-0.134772	0.688217	0.942424	-0.317533	-2.11424	0.588902	1.02758	-0.79575	20
EPB41L3	0.157991	-0.0813152	0.340207	0.41807	-0.428153	-2.39193	1.06483	0.788721	0.13158	20
SMARCA2	-0.349636	-0.405345	0.322539	0.147483	0.235406	-2.27654	0.879477	1.23798	0.208632	20
Average	0.303841	0.42219	0.379321	0.284368	0.16393	-2.23975	0.29949	0.590598	-0.203992
	±	±	±	±	±	±	±	±	±		Slope =	-0.0701647
SD	0.385508	0.456461	0.246082	0.320779	0.544482	0.263534	0.454301	0.69505	0.660223
SPTAN1	0.568989	0.999429	-1.34131	-1.72548	-0.434876	0.587312	0.0249032	0.163622	1.1574	21
ANP32E	0.98562	1.22585	-0.597436	-0.889279	0.220424	-0.340036	-0.893773	1.44304	-1.15442	21
CSE1L	1.33792	0.508797	-0.87194	-1.04373	-0.912694	-0.0502927	-0.521094	-0.169116	1.72214	21
SET	0.765383	0.576378	-0.86723	-1.15272	0.00397087	0.347972	-0.66323	1.9002	-0.910716	21
PRKAR1A	1.1458	1.37802	-0.177104	-0.224867	0.00205674	0.823072	-0.963189	-1.74468	-0.239117	21
KPNA4	0.681233	1.03465	-0.519019	-0.615431	-1.12737	0.775295	-0.52521	1.49433	-1.19848	21
ILK	0.863617	1.3062	-1.29278	-1.48193	-0.471881	-0.194972	1.12469	0.342032	-0.194972	21
RAB4A	0.787129	1.07577	-1.30036	-0.899022	0.010443	0.816341	0.592909	-1.57098	0.487769	21
KATNAL2	1.21345	1.52023	-0.144089	-0.0996396	-0.249061	-0.0887215	0.0682148	-2.01743	-0.202953	21
TIAL1	0.881396	1.19083	-0.846293	-1.0673	0.507555	0.37536	0.149998	0.591414	-1.78296	21
RTCB	1.35191	1.37007	-1.24132	-0.544532	-0.553329	-0.0516816	-0.523339	1.05961	-0.867383	21
TUSC3	1.04486	2.03748	-0.485334	-0.419381	-0.32087	0.261085	-0.610076	-1.33075	-0.177015	21
PPA1	1.42597	1.69458	-1.14318	-0.729967	0.275486	0.275486	-0.667764	-0.6613	-0.469317	21
CPSF6	1.21124	1.36788	-0.649792	-0.733531	-1.63599	-0.0402671	-0.405301	0.926031	-0.0402671	21
NUDT21	0.842641	1.27056	-0.62351	-0.928693	-0.185701	0.161051	0.350958	0.943277	-1.83058	21
ATP6V1E1	1.3525	1.57825	-0.496016	-1.60603	-0.135573	-0.0479218	0.0810276	0.167708	-0.893945	21
ACTL6A	0.520454	1.64974	-0.357594	-0.894861	0.516444	-0.234701	-0.96903	1.06619	-1.29664	21
CNN3	1.23219	1.39098	-0.506304	-0.995816	0.0953342	0.0953342	-0.221185	0.603032	-1.69356	21
ATP6V1D	1.22636	1.72133	-0.850896	-0.942363	0.11961	-0.0370241	-0.321502	-1.28928	0.373762	21
ATP6V1G1	1.0416	1.78543	-0.916631	-1.13974	-0.0108178	0.00694984	-1.18485	-0.0108178	0.428876	21
API5	0.90574	1.32018	-0.584941	-0.43566	-0.806922	0.369603	0.196193	0.862101	-1.8263	21
CTD-2410N18.5	1.53777	1.17188	-0.0866835	-0.330643	0.264277	0.088617	-1.75644	0.0975566	-0.986325	21
NARS	1.21465	1.6427	-0.487159	-0.812518	-1.54648	0.356241	-0.465214	-0.258461	0.356241	21
DNAJA2	1.44201	1.32831	-1.01066	-1.18845	-0.893098	0.226145	-0.729074	0.442889	0.38193	21
ACBD3	1.64821	1.47389	-0.775461	-1.28611	-0.00619037	0.244816	-0.704453	-0.049803	-0.544904	21
DYNC1I2	0.816881	1.26078	-1.45758	-0.343272	0.812668	-0.00728733	-0.00728733	-1.60106	0.52616	21
GSK3B	0.88336	1.38324	-0.833222	-0.79371	-1.17639	0.393717	0.0934776	1.12776	-1.07823	21
PPIL1	0.937193	1.41252	-1.07684	-0.114788	-0.800101	0.443185	-1.48402	0.925242	-0.242399	21
TOM1L2	0.561121	0.650969	-1.28332	-1.10304	-0.635484	0.623989	-1.05051	1.10246	1.13382	21
ABCE1	1.19346	1.68212	-0.533986	-0.944381	-1.1045	0.499317	-0.554141	-0.737214	0.499317	21
HSPA12A	1.02384	1.23762	-0.965224	-1.02593	-0.903458	0.641928	0.268341	0.885432	-1.16256	21
SRP68	0.820841	1.27224	-0.705606	-1.2801	-1.11468	0.251803	0.202328	1.29424	-0.741075	21
FSCN2	0.768604	1.23698	-0.894292	-1.75778	-0.618436	-0.0762156	0.539456	1.10403	-0.302344	21
BZW1	0.869538	0.812789	-0.653415	-2.23263	0.0994595	0.700906	-0.00441166	0.745803	-0.338035	21
MAPRE2	1.4237	1.40128	-1.07375	-0.56669	-0.471936	0.55532	-1.04164	-0.781599	0.55532	21
PDCD10	0.594077	1.4593	-0.970211	-1.93524	0.562302	0.309551	0.202082	0.309551	-0.531412	21
DPY30	1.23002	1.57241	-1.09859	-1.15273	-0.336384	0.405441	-1.01828	-0.00732247	0.405441	21
SF3A2	0.305715	1.18744	-0.808933	-0.959907	-1.14948	0.62339	-1.09535	1.27374	0.62339	21
FUBP1	1.09619	1.22992	-1.28414	-1.25849	-0.935112	0.603634	-0.501178	0.445536	0.603634	21
CTSB	1.03774	1.1195	-1.17715	0.334375	0.862874	0.160021	-1.74249	-0.604825	0.00994961	21
GPS1	0.975438	1.70622	-0.789464	-1.2699	-0.988828	0.547754	-0.534646	-0.194329	0.547754	21
PSMA6	1.01248	1.47114	-0.681065	-1.17766	-1.10209	0.599116	0.439181	-1.00029	0.439181	21
CRYM	1.02032	1.09263	-1.49575	-1.26929	0.211777	0.700337	0.367835	0.410295	-1.03816	21
ME1	1.11123	1.37878	-0.490443	-0.196306	-1.50032	0.681879	-0.920575	-0.746137	0.681879	21
TTLL12	1.12123	1.54374	-0.552513	-0.715136	-1.2239	0.664377	-0.881514	-0.620659	0.664377	21
COPS2	1.00123	1.65382	-0.46512	-0.856136	-1.32951	0.607853	-0.786576	-0.433411	0.607853	21
PACSIN3	1.18111	1.62771	-0.831216	-1.35119	-0.158457	0.84635	-0.156816	-0.540079	-0.617411	21
CLINT1	0.738822	1.09254	-0.929659	-1.40909	-0.775397	1.16184	-0.021687	0.92247	-0.779839	21
MAP1S	0.692441	1.22609	-1.25859	-0.61721	-1.73303	0.626104	-0.0715252	0.509621	0.626104	21
COPS7A	1.36418	1.32482	-0.51445	-0.658924	-0.772609	0.668666	-1.16258	-0.917767	0.668666	21
PRRC1	0.977867	1.46576	-1.29805	-1.35166	0.146166	0.578152	-0.333161	-0.76323	0.578152	21
LIMA1	0.640145	1.14427	-1.38177	-1.20726	-1.24034	0.258975	0.994938	0.341719	0.449326	21
TES	1.12876	1.34224	-0.835478	0.683411	-1.47192	0.683411	-0.751849	-0.0306255	-0.747949	21
QKI	0.562859	1.49386	-0.944572	-0.915302	-1.25688	0.687075	-0.914803	0.600687	0.687075	21
SIRT2	0.894904	1.38557	-0.702618	-1.41605	-0.327991	1.11902	-0.862907	0.534697	-0.624626	21
BASP1	1.01203	1.07291	-0.096422	0.0709145	-1.46863	-0.0277656	-1.70237	0.799436	0.339904	21
CIAPIN1	1.10559	1.21996	-0.655845	-0.651874	-1.75446	0.71241	0.71241	-0.115733	-0.572455	21
SARNP	0.754134	1.33899	-0.427857	-0.644487	-1.95606	0.718737	-0.416209	-0.085989	0.718737	21
UBA5	1.27416	1.18454	-0.671576	-0.556702	-1.3973	0.720416	-1.09004	-0.183912	0.720416	21
DHDH	1.09676	1.37554	-0.635866	-0.40185	0.763482	0.763482	-1.01908	-0.618889	-1.32358	21
EIF4G3	0.824621	1.43136	-0.501957	-0.8907	-1.41729	0.506011	-0.363022	1.13954	-0.728558	21
ACOT7	1.14718	1.41379	-0.683321	-0.502919	0.760387	0.760387	-1.01627	-0.867649	-1.01159	21
EIF2S2	0.768597	1.23302	-1.09728	-0.941329	-1.62107	0.735836	-0.0947553	0.28114	0.735836	21
IAH1	1.11074	1.30977	-0.599515	-0.356677	0.799	0.799	-0.918697	-0.801872	-1.34175	21
UAP1L1	0.990514	1.31447	-0.565614	-0.980968	0.786397	0.786397	-0.921213	-0.023322	-1.38666	21
WARS	1.15156	1.29529	-0.547462	-0.817082	-1.36113	0.79889	-0.78166	-0.537297	0.79889	21
LZIC	1.20183	1.19042	-0.740465	-0.574232	-0.335618	0.792584	-0.86043	-1.46667	0.792584	21
SEC23B	1.05461	1.40159	-0.657594	-0.884554	-0.798932	0.839989	-1.05223	-0.742866	0.839989	21
PLIN5	0.860483	1.39793	-1.05224	-0.868647	0.93303	0.93303	-0.804172	-0.50396	-0.895459	21
TPD52	0.905023	1.27982	-0.0781136	-0.192361	-0.943836	0.802318	0.802318	-1.34185	-1.23332	21
COPS5	0.841915	1.51235	-1.1834	-0.795568	-0.534979	0.855043	-0.876002	-0.674406	0.855043	21
PLXNA1	0.981028	1.65795	-0.553614	-0.545387	-0.757081	1.22336	-0.598263	-1.06864	-0.339347	21
ARSA	0.721094	1.09518	-0.204817	-0.383633	-0.732336	1.04017	-1.09579	1.04017	-1.48003	21
PLS1	0.646898	1.32711	-1.16557	-1.49476	-0.783851	1.09401	0.194587	0.516111	-0.334535	21
VTA1	0.94236	1.25458	-0.204926	-0.582941	-0.744712	0.874275	-0.922023	0.874275	-1.49089	21
AIMP1	0.864557	1.35575	-0.444645	-0.823352	-0.81389	0.940921	-1.19048	0.940921	-0.829782	21
MAPK14	1.00491	1.2559	-0.342293	-0.88432	0.878194	0.878194	-1.29257	-0.450249	-1.04776	21
TARS	1.01212	1.07852	-0.271847	-0.352089	-1.69031	0.884251	-0.76174	-0.783153	0.884251	21
SULT1E1	0.900168	1.13801	-1.13065	-1.25923	0.992248	0.992248	-0.743924	-0.206731	-0.682134	21
PDLIM5	1.03263	1.14077	-0.831485	-0.808258	-1.25314	0.963459	-0.860485	-0.346949	0.963459	21
DRG2	0.825672	1.02545	-0.736076	-1.0404	-1.42126	0.982114	-0.810144	0.192532	0.982114	21
UBA7	0.966173	1.30397	-0.557253	-0.730922	-0.968226	0.646945	-0.939826	-0.919479	1.19862	21
CUL1	0.871189	1.19316	-0.590691	-0.823622	-1.00051	1.02618	-1.19359	-0.508302	1.02618	21
EFTUD1	0.785903	1.21794	-0.935704	-0.525662	-1.25517	1.04715	-0.800839	-0.580757	1.04715	21
HAGH	0.876383	0.996774	-0.477344	-0.281505	-1.34214	1.06664	1.06664	-0.812843	-1.09261	21
CARS	0.945726	1.09737	-0.757024	-0.927021	1.05292	1.05292	-0.590902	-0.666278	-1.20771	21
GPR98	1.52076	1.52076	-1.12016	-0.986185	-0.853196	0.41225	-0.306157	-0.356668	0.168604	21
MFSD10	1.24705	1.24705	-0.516721	-0.654642	-0.810098	1.40489	-0.717257	-1.00599	-0.194271	21
Average	0.993844	1.31097	-0.763584	-0.84253	-0.554055	0.560357	-0.503299	-0.0378543	-0.163853
	±	±	±	±	±	±	±	±	±		Slope =	-0.112564
SD	0.25029	0.247832	0.341804	0.471598	0.778315	0.382551	0.632234	0.863635	0.879057
RPS3A	-0.321494	0.61557	-0.0686144	-0.0188378	-1.54225	1.91808	-0.279942	0.664521	-0.967033	22
RAB5C	0.260892	0.383067	-0.330855	-0.411709	-0.109129	2.26196	-0.281042	-1.48941	-0.283781	22
SNRPE	-0.0753784	0.0155673	-0.420361	-0.53719	-0.471421	2.32827	0.183572	0.303555	-1.32661	22
YBX1	-0.314683	-0.274941	0.3584	0.354996	-0.850374	2.3361	-0.11296	-0.389209	-1.10733	22
CDC42	0.304533	0.439992	-0.692938	-0.618394	0.574787	2.19512	-0.605467	-0.971108	-0.626522	22
SERPINB12	0.012136	0.105949	-0.595863	-0.995498	-0.277127	2.4339	-0.0324793	0.137578	-0.7886	22
COPB2	-0.160823	0.437536	-0.902319	-0.929279	0.0158936	2.05604	-0.296531	-1.04972	0.829202	22
LYZ	-0.397145	-0.310997	-0.949054	-1.02946	-0.486627	2.14103	-0.0963374	0.165478	0.963115	22
RPL8	-0.202446	-0.932705	0.237682	-0.47728	-0.872112	1.78962	-0.94748	1.39414	0.0105773	22
CPNE1	-0.545971	-1.18413	-0.291587	-0.270181	-0.193656	2.44855	-0.0637493	-0.172901	0.273623	22
OTOG	-0.48333	-0.782509	-0.153515	-0.52442	-0.609212	2.5172	-0.0975057	-0.187954	0.321241	22
IARS	0.224886	0.328321	-0.480764	-0.531668	-0.247769	2.43455	-0.0969107	-0.798997	-0.831645	22
TARDBP	0.795628	-0.713335	-0.67818	-0.940596	-0.675031	1.56689	-0.333351	1.49232	-0.51434	22
RPL37A	-0.109384	-0.0512996	-0.149285	-0.0781605	-0.76398	2.55884	-0.188287	-0.454468	-0.76398	22
OTOGL	-0.42215	-0.766617	-0.126414	-0.623334	-0.842373	2.42136	0.0538839	-0.169174	0.474813	22
ENPP6	0.889607	-1.02457	-0.31404	-1.02946	0.209482	1.92057	-0.0449309	-1.03883	0.432169	22
PPIP5K1	-0.378852	-0.14938	-0.138924	-0.94081	0.318524	2.41531	-0.105962	-0.0287086	-0.991201	22
EDF1	0.346118	0.887523	-0.940036	-0.945	-0.432312	2.16284	-0.561683	-0.22987	-0.287581	22
SMARCC1	-0.180351	-0.407901	-0.652441	-1.16896	-0.521029	1.88448	0.17601	1.3776	-0.507409	22
MYL9	-0.466385	-0.614538	-0.275361	-0.189667	-0.0167984	2.11042	-1.44545	0.0326093	0.86517	22
SF3B4	-0.731654	-0.365877	-0.764529	-0.301445	-0.405617	2.24861	-0.559187	1.0461	-0.166391	22
ITGA8	-1.13529	0.789949	0.501805	-0.683908	0.204459	2.00286	-1.02508	-0.48411	-0.170687	22
TMEM165	0.284041	-1.98018	-0.436785	-0.535294	0.565361	1.75587	-0.101805	0.284041	0.164746	22
YTHDF3	0.332957	-0.499204	-0.681914	-0.619809	-0.93446	2.07439	0.637323	-0.916368	0.607089	22
FARP1	0.921742	-1.44179	0.0814621	-0.355923	-0.355923	2.0657	-0.721761	-0.0475455	-0.145961	22
TMED3	-0.916047	0.297414	-0.443577	-0.61051	-0.0219104	2.37052	-0.912077	0.0101798	0.226007	22
DLG1	0.442402	0.774518	-0.215976	-0.703478	-0.50791	2.16055	-1.12184	-0.67433	-0.153937	22
LRRC15	-0.418506	-0.0622206	-0.212202	-1.30761	-0.549973	1.79687	0.189009	1.36392	-0.799292	22
UFL1	-0.211148	1.23333	-0.317315	-0.565762	-0.112136	2.10469	-0.727565	-0.869622	-0.534472	22
DDRGK1	0.844686	-1.45063	0.0247405	-0.382042	0.511273	1.76497	0.340731	-1.12317	-0.530557	22
MTA1	0.221847	-0.26081	-0.66815	-0.92119	-0.838152	2.11458	-0.0784378	1.02603	-0.595724	22
PTK7	-0.188158	0.940121	-0.191355	-0.291707	-1.57274	1.84551	-0.322166	-0.799584	0.580078	22
RAB22A	0.949825	-0.361507	-1.15118	-1.16899	0.539803	1.94121	-0.111607	-0.320718	-0.316828	22
PTPN11	0.913027	0.676147	-0.778119	-0.735023	-0.455131	1.998	-1.09471	-0.381622	-0.142566	22
NCALD	0.0533148	-0.13828	-0.376611	-0.101385	-0.380302	1.98981	0.422033	0.376005	-1.84458	22
CHD4	0.107609	-1.02524	-0.136899	-0.635126	-1.04736	1.64635	0.276451	1.47945	-0.665233	22
PCDH1	0.840951	-0.446874	-0.881046	-1.02008	-0.421249	1.83974	-0.977844	0.840951	0.225449	22
VSNL1	-0.277969	0.28857	-0.208785	0.0508318	-0.901804	2.2717	-0.396948	0.399926	-1.22552	22
TRAM1	0.180685	1.58373	-1.18091	-0.956685	-0.300868	1.58373	-0.00542537	-0.185924	-0.718335	22
PRKCD	-0.00309388	-0.972512	-0.0808539	-0.830001	-0.389358	2.40891	0.0258448	-0.521646	0.362713	22
EWSR1	0.301943	0.62785	-0.752672	-1.13282	-1.33527	1.83512	-0.131209	-0.109383	0.696442	22
NRF1	-0.621039	-0.455349	-0.461919	-0.0871533	-0.0790875	1.94105	0.0200805	1.17146	-1.42805	22
Q8UWF3	0.475804	0.0147872	-0.420193	-1.22599	-1.48622	1.68309	-0.193554	0.994951	0.157317	22
CAMK2G	-0.246569	-0.762755	-0.811588	-0.0278166	-0.266624	2.15771	-0.436688	1.11986	-0.725526	22
SYNM	-0.434504	-0.501521	-0.416931	-1.22132	-0.317444	1.95955	-0.308765	1.35814	-0.117205	22
NUP133	0.152291	0.557258	-0.612842	-1.4819	-0.597009	1.86859	0.164614	0.75496	-0.805965	22
SMARCA5	-0.510731	-1.10785	-0.34282	-0.718961	-0.559067	2.05242	0.421461	1.04676	-0.281212	22
EEA1	-0.0994485	-0.621969	-0.232399	-0.973354	-1.31288	1.72242	0.117628	1.37735	0.0226455	22
DTNA	1.55969	-1.19448	-0.714606	-0.402019	-0.331902	1.55969	-0.69227	-0.351938	0.567842	22
MLLT4	-0.135635	0.304323	-1.01894	-1.10763	-1.08998	2.00657	0.193573	0.503653	0.344066	22
STAG2	0.204355	0.165167	-0.58246	-1.09496	-0.856518	1.97652	-0.0670105	1.05361	-0.798703	22
NOL9	-0.641736	-0.78954	-0.848099	-0.344721	-0.609129	2.03434	0.571858	1.05295	-0.425921	22
CACNA2D1	-0.405437	0.0258611	-0.207649	-0.376195	-0.847944	1.55157	-1.44658	1.55157	0.15481	22
AGO3	-0.0816993	0.505003	0.125786	-0.32897	-1.62055	1.93193	0.076644	0.425627	-1.03378	22
KIAA1468	-0.026304	0.403261	-0.758532	-1.35585	-0.509894	2.23043	-0.195381	0.358593	-0.146324	22
WDR26	-0.433778	0.406998	-0.324737	-0.978751	-1.10482	2.01568	0.105936	0.943759	-0.630289	22
DNAJA1	1.5727	0.52253	-0.940516	-0.856232	-0.683715	1.5727	-0.422425	-0.0479086	-0.717134	22
NBAS	-0.520027	-0.616318	-0.134314	-0.566703	-0.484622	2.42522	0.489416	0.192971	-0.785624	22
OSBP2	-0.188165	0.565572	-0.877962	-1.01324	-0.809135	2.1633	0.30268	-0.524748	0.381694	22
ABCC3	-0.407595	-0.346167	-0.276492	-0.619552	-0.877428	2.52791	0.247009	-0.154375	-0.0933051	22
NONE	-0.684011	0.749844	-0.439851	-0.185398	0.720446	2.1166	-0.846039	-0.750957	-0.680635	22
KIAA0196	-0.0767058	-0.689465	-0.216934	-0.494763	-0.662897	2.18856	0.0766284	0.933791	-1.05822	22
CGNL1	1.65676	-0.106535	-0.819013	-0.762913	0.162707	1.65676	-0.916459	-0.427801	-0.443517	22
TAOK1	-0.222685	-0.481696	-0.513969	-0.608789	-0.192308	2.60223	-0.13386	-0.504015	0.0550866	22
COL5A1	-0.543744	-0.689911	-0.277507	-0.611636	-0.968303	2.11349	-0.314497	1.11462	0.177483	22
UTRN	0.00812637	0.155498	-0.382477	-0.600618	-1.41205	2.16767	-0.128425	0.704859	-0.512585	22
EXTL3	-1.1731	0.291363	-0.941723	-0.63052	-0.224557	1.58324	-0.433379	1.58324	-0.0545666	22
MYO5A	-0.198045	-0.298954	-0.0373164	-0.320014	-0.832685	2.30483	0.0908254	0.512473	-1.22111	22
CLASP2	0.242295	0.419256	-0.65753	-1.04674	-0.706441	2.04745	0.244309	0.547092	-1.08969	22
KIF21A	0.0717189	0.175096	-0.868335	-0.818533	-0.883436	2.37629	0.0685811	0.163941	-0.285323	22
BRD3	-0.00520655	-1.08119	-0.129351	-0.0990018	-0.728489	2.41567	-0.27657	0.37471	-0.47057	22
SIN3A	1.44581	-0.110956	-0.590512	-0.345503	-0.991667	1.44581	-0.0403236	0.599575	-1.41223	22
TMEM214	-0.805655	-0.0386568	0.322979	-0.0422831	-0.596646	2.3839	-0.233585	0.0792933	-1.06935	22
SEC16A	0.0427014	0.511862	-0.320485	-0.471698	-0.644414	2.46807	-0.584905	-0.325837	-0.675298	22
MYLK	0.42714	0.573248	-0.336512	-0.421472	-0.502108	2.30733	-0.487416	-1.0695	-0.490705	22
PBRM1	0.136689	-0.981909	-0.528059	-0.529998	-0.824594	2.06782	0.374628	0.955276	-0.669851	22
VRK3	0.133507	0.649347	-1.19938	-0.942272	-0.694958	1.87106	0.425609	0.599535	-0.842446	22
OSBPL11	0.341514	0.517314	-0.715556	-1.08235	-0.782512	2.19372	0.0645617	0.155525	-0.69221	22
RALBP1	1.66448	-0.06077	-0.879225	-0.602529	-1.03176	1.66448	-0.410551	-0.288101	-0.056032	22
PDS5A	0.179654	0.202112	-0.373904	-0.317543	-1.17649	1.97301	0.325909	0.586809	-1.39956	22
IK	1.47821	-0.381589	-1.10365	-0.594909	-0.669124	1.68388	0.0637088	0.351876	-0.828403	22
PARP3	-0.159364	-0.361928	-0.486789	-0.697058	-0.0456093	2.42075	-0.937667	0.548332	-0.280663	22
KIAA1033	-0.130905	-0.324662	0.500306	-0.472677	-0.263015	2.1644	0.621639	-0.862064	-1.23302	22
VAC14	0.61084	0.482532	-0.567975	-0.540153	-0.67216	2.23159	-0.275107	-0.151919	-1.11764	22
RECK	-0.622746	-0.450341	-0.806081	-0.0138593	-0.96822	2.22754	-0.416466	0.26511	0.785067	22
MYO1E	-1.16489	-0.878358	-0.22154	-0.559454	0.00978366	2.16882	0.414172	0.666762	-0.435294	22
TRAPPC11	-0.552314	-0.260713	-0.458241	-0.679957	-0.70116	2.4152	-0.310972	0.711632	-0.163473	22
CSTF3	0.433517	-0.451421	-0.675694	-0.640008	-0.581146	2.45634	0.149578	-0.111545	-0.57962	22
COL12A1	1.45948	-0.720498	-0.443095	-0.859982	-1.12785	1.45948	0.418442	0.547491	-0.733461	22
EPHB2	1.5889	-0.551345	-0.891239	-0.809915	-0.996535	1.5889	0.317817	-0.313108	0.066527	22
MTOR	0.445376	0.561424	-0.547704	-0.444599	-1.25679	2.14595	0.0112469	-0.0184146	-0.896491	22
UBR4	0.507068	0.75491	-0.264926	-0.44139	-0.685531	2.15548	-0.514592	-0.316456	-1.19456	22
PTPRG	-0.146332	-0.918225	-0.496453	-0.55652	-0.013587	1.68647	-0.86551	1.68647	-0.376314	22
FLII	0.108156	0.454379	-0.316655	-0.74757	-1.201	2.33073	-0.17981	0.0158873	-0.464118	22
DOCK7	-0.310716	0.324494	-0.461622	-0.42415	-1.21835	2.29095	-0.0315178	0.488616	-0.657704	22
DST	-0.216245	-0.309851	-0.143009	-0.642069	-0.0584406	2.54806	-0.240412	-0.933089	-0.00494973	22
TLDC1	0.166026	0.598572	-0.440022	-0.531606	-0.870927	2.37169	-0.774395	-0.159773	-0.359564	22
MARK3	-0.0338038	0.31938	-0.566529	-0.584119	-0.940619	1.56051	1.56051	-0.103364	-1.21197	22
MACF1	-0.116203	0.143327	-0.522774	-1.17212	-1.14205	2.16251	-0.142073	0.451009	0.338377	22
VPS18	0.451789	0.503718	-0.944673	-0.684807	-0.732723	2.27364	-0.125043	-0.0679694	-0.673936	22
FMNL2	-0.487192	-0.40798	-0.708619	-0.333544	-0.502828	1.74668	-0.334759	1.74668	-0.718431	22
TBC1D9B	0.449216	0.609314	-0.676649	-0.631736	-1.27125	2.12802	-0.38272	0.244181	-0.468374	22
ABCC13	-0.309992	-0.627485	-0.168513	0.0353469	-0.781268	1.67321	-1.02482	1.67321	-0.469692	22
VPS13C	0.340235	0.621438	-0.583794	-0.693663	-0.503213	2.3304	-0.641486	-0.117018	-0.752903	22
MDN1	-0.374911	-0.626801	0.132363	-0.111357	-0.234371	2.59375	-0.345296	-0.49435	-0.539029	22
ANK2	0.708506	0.340837	-0.539437	-0.0223428	-1.19594	2.20774	-0.353647	-0.620764	-0.524951	22
ARID1A	-0.494879	-0.552393	-0.392294	-0.699008	-0.426994	2.48412	-0.177971	0.570709	-0.311288	22
MPRIP	-0.572946	-0.281167	-0.659717	-1.09594	-0.981964	2.01623	0.395838	0.782783	0.39688	22
ARHGEF7	0.0349263	0.31563	-0.779655	-0.695356	-0.683621	2.46299	-0.262272	0.0569022	-0.449545	22
CDC42BPA	-0.0609098	0.099352	-0.0632189	-0.620325	-0.524068	2.55744	-0.571065	-0.161182	-0.656025	22
AKAP9	-0.499038	0.837015	-0.793788	-0.912157	-1.19265	2.00846	0.0895032	0.323141	0.139512	22
SYNE1	-0.590394	-0.669507	-0.191791	-0.528964	-1.10548	2.26917	-0.111483	0.653903	0.27454	22
Average	0.0453611	-0.0966171	-0.459649	-0.623524	-0.6023	2.08813	-0.185145	0.220585	-0.386841
	±	±	±	±	±	±	±	±	±		Slope =	0.041391
SD	0.613503	0.644303	0.350576	0.351047	0.486925	0.294699	0.468226	0.737996	0.5739
ALPL	-0.198673	-0.309247	-1.08047	-1.60521	-0.455683	1.43175	0.419568	0.710777	1.08719	23
CDH2	-1.29321	0.957586	-0.601361	-0.691049	-0.529881	0.957586	-0.54071	-0.0142807	1.75532	23
ALCAM	-0.59887	-0.743845	-0.417957	-0.628578	-0.778485	1.55271	-0.432883	0.243905	1.804	23
NONE	-0.27292	-0.07801	-0.760025	-1.45115	-0.608027	0.778727	-0.278336	0.778727	1.89102	23
RRBP1	-0.56589	-0.255916	-0.0353032	-0.888799	-1.30865	1.61778	0.0448335	-0.176526	1.56848	23
TJP2	-0.813029	-0.180246	-0.80069	-0.56628	-0.87957	1.80339	-0.493949	0.639841	1.29053	23
CRELD1	-1.13648	0.973365	-0.411128	-0.462584	-0.492095	0.973365	-0.821267	-0.444304	1.82112	23
TSPAN3	-0.891871	0.601594	-0.926896	-0.402011	-0.690706	1.80673	-0.974906	0.601594	0.876474	23
NEXN	0.236713	0.260655	-1.07078	-0.809178	-0.402835	0.978955	-1.40272	0.582022	1.62717	23
SF3A1	0.576043	0.980941	-0.510117	-1.39818	-1.35688	1.09316	-0.508648	0.030518	1.09316	23
APOAIV	0.014854	-0.0182125	-0.841215	-0.821798	-1.38583	1.34684	-0.543575	1.29422	0.954713	23
NUP160	-0.0260085	0.308061	-0.821947	-1.41751	-1.38393	1.16161	0.300147	0.717955	1.16161	23
PDXDC1	0.749969	0.763151	-0.870719	-1.14593	-1.51859	1.0816	-0.323591	0.18252	1.0816	23
CTNNA3	-0.43562	-0.538114	-0.705725	-0.798979	-0.570529	1.72575	-0.304422	-0.0981178	1.72575	23
PPFIBP2	0.518374	0.725645	-0.929983	-1.20225	-1.30412	1.24464	-0.308715	0.0117704	1.24464	23
FBXO44	0.531503	1.05015	-0.67625	-0.366721	-1.4046	1.17723	-1.03616	-0.452381	1.17723	23
NUP54	-0.0866869	0.299667	-0.746043	-1.64617	-1.06907	1.1814	0.0491322	0.836376	1.1814	23
USP10	0.401084	0.970315	-1.01849	-1.15261	-1.14344	1.23693	-0.373839	-0.156882	1.23693	23
PRPF6	-1.15062	-0.336851	-0.770923	-0.834698	-0.704287	1.38365	0.0589425	0.971131	1.38365	23
SKIV2L	0.0223148	0.0350751	-1.04555	-1.27011	-1.16765	1.31195	0.114222	0.687785	1.31195	23
SNX4	0.671327	0.539274	-0.856159	-1.7414	-0.729652	1.18682	-0.363605	0.106576	1.18682	23
BRE	0.173914	0.615093	-0.791357	-0.826704	-1.15782	1.4781	-0.710274	-0.259058	1.4781	23
RRAGC	0.286579	0.306739	-1.28607	-0.577219	-0.164708	1.49123	-0.487422	-1.06036	1.49123	23
KIF13B	0.469309	0.786108	-0.851766	-0.624408	-1.21564	1.34372	-0.921239	-0.329801	1.34372	23
PCYT2	0.892094	0.640464	-0.773213	-1.10853	-0.308172	1.24903	-0.749997	-1.09071	1.24903	23
USP4	0.214708	0.581455	-0.67263	-0.991321	-1.39546	1.41048	-0.501298	-0.0564084	1.41048	23
HDHD3	-0.461337	0.0397947	-0.401533	-0.574482	-0.573852	1.68317	-1.10117	-0.293771	1.68317	23
CUL3	0.0904762	0.426657	-0.781324	-0.790921	-0.998921	1.56981	-0.713144	-0.372447	1.56981	23
ARMC6	0.384624	0.583221	-0.774505	-0.748191	-0.906018	1.47031	-0.977478	-0.502281	1.47031	23
C7ORF26	-0.675871	-0.47737	-0.663083	-0.841676	-0.748973	1.62819	-0.307413	0.458015	1.62819	23
Q5ZIN3	-0.455157	-0.0208699	-0.842811	-0.567013	-1.19678	1.62897	-0.141671	-0.0336283	1.62897	23
INPP5B	0.239317	0.630377	-0.626391	-1.10964	-0.977682	1.47445	-0.613383	-0.491505	1.47445	23
ARHGEF37	0.415039	0.548833	-0.774075	-0.869011	-1.16766	1.45618	-0.523355	-0.542129	1.45618	23
COG3	-0.13105	0.44956	-0.874356	-1.13652	-0.624102	1.11838	-0.648238	-0.0666816	1.91301	23
NUP188	-0.253783	0.211618	-0.995409	-0.727714	-1.31472	1.51604	-0.124425	0.172352	1.51604	23
SUPT6H	-0.773067	-0.518495	-0.569394	-0.742474	-0.616724	1.70176	-0.27729	0.0939177	1.70176	23
STRIP1	0.162146	0.228183	-0.530727	-0.264644	-1.00542	1.54429	-1.27571	-0.402414	1.54429	23
UPF2	-0.0885702	0.161226	-0.932009	-1.08267	-0.704944	1.61988	-0.344631	-0.248175	1.61988	23
ARHGAP5	0.27252	0.238512	-0.552045	-0.753026	-1.20226	1.5463	-0.83849	-0.257808	1.5463	23
SRGAP2	-0.177474	0.0821508	-0.75651	-0.610904	-1.03555	1.66754	-0.545651	-0.291141	1.66754	23
WDR7	-0.266372	-0.0114732	-1.30336	-1.12937	-0.533431	1.5219	0.00590264	0.194309	1.5219	23
Average	-0.0836498	0.280654	-0.771958	-0.911649	-0.920325	1.39396	-0.476021	0.0408169	1.44817
	±	±	±	±	±	±	±	±	±		Slope =	0.138421
SD	0.545186	0.467985	0.238579	0.35892	0.356582	0.251537	0.408912	0.52926	0.257265
LECT1	-0.533625	-0.133329	-1.0067	-1.39181	1.60145	1.16036	0.0229056	0.771186	-0.490447	24
STAT3	0.204462	1.02302	-0.920837	-1.26591	1.25215	1.25215	-0.395506	-0.0706585	-1.07888	24
STAT5A	0.520294	0.567996	-0.748058	-0.831891	1.3281	1.3281	-0.560191	-0.08574	-1.51861	24
FGA	-0.117742	-0.752019	-0.701344	-0.527891	1.6963	1.6963	-0.0822196	-0.883836	-0.327541	24
NUP98	-0.58632	-0.137027	-0.889103	-0.866828	1.3581	1.3581	0.238092	0.820127	-1.29514	24
PALLD	0.493766	0.293034	-1.6469	-1.16216	1.27732	1.27732	-0.565891	-0.0917717	0.12528	24
[truncated: 118 more rows]
