# Supplementary material for: PDZD7-MYO7A complex identified in enriched stereocilia membranes
Source: eLife. 2016 Aug 15;5:e18312. doi: 10.7554/eLife.18312 (PMC5005036; doi:10.7554/eLife.18312)
Supplement: Figure 3—source data 1. — DOI: http://dx.doi.org/10.7554/eLife.18312.012 [file elife-18312-fig3-data1.xls]

## Sheet: Read me
File:	Figure 3—Source data 1 (138-1 immunoprecipitation final data)
In support of:	Morgan et al. "PDZD7-MYO7A Complex Identified in Enriched Stereocilia Membranes"
General comments:	Master data file for processed data. MaxQuant output was processed further in "Data" sheet.
Tabs:	Label	Description
	1	Read me	The present sheet
	2	Data	All data
Samples:	Source	Sample name	RAW data file names
	Control immunoprecipitation, biological replicate 1, technical replicate 1	iBAQ CON_1_GIL1467	GIL1467_ControlMagIP_Directinjection_15ul_HCDonly_25cm_150min_20140307_OT
	Control immunoprecipitation, biological replicate 2, technical replicate 1	iBAQ CON_2.1_GIL1649	GIL1649_IP_CTRL_shotgun_20150216_OT
	Control immunoprecipitation, biological replicate 2, technical replicate 2	iBAQ CON_2.2_GIL1649	GIL1649_IP_CTRL_shotgun_20150223_OT
	Control immunoprecipitation, biological replicate 2, technical replicate 3	iBAQ CON_2.3_GIL1649	GIL1649_IP_CTRL_2_shotgun_20150324_OT
	Control immunoprecipitation, biological replicate 3 technical replicate 1	iBAQ CON_3.1_GIL1651	GIL1651_CtrlIP_Elut_shotgun_20150327_OT
	Control immunoprecipitation, biological replicate 3 technical replicate 2	iBAQ CON_3.2_GIL1651	GIL1651_CtrlIP_Elut_shotgun_2_20150331_OT
	138-1 immunoprecipitation, biological replicate 1, technical replicate 1	iBAQ 138-1 1 GIL1467	MYO7A_1_GIL1467
	138-1 immunoprecipitation, biological replicate 2, technical replicate 1	iBAQ 138-1 2.1 GIL1649	MYO7A_2.1_GIL1649
	138-1 immunoprecipitation, biological replicate 2, technical replicate 2	iBAQ 138-1 2.2 GIL1649	MYO7A_2.2_GIL1649
	138-1 immunoprecipitation, biological replicate 2, technical replicate 3	iBAQ 138-1 2.3 GIL1649	MYO7A_2.3_GIL1649
	138-1 immunoprecipitation, biological replicate 3, technical replicate 1	iBAQ 138-1 3.1 GIL1651	MYO7A_3.1_GIL1651
	138-1 immunoprecipitation, biological replicate 3, technical replicate 2	iBAQ 138-1 3.2 GIL1651	MYO7A_3.2_GIL1651
	TOTAL (fraction S7; RIPA-soluble), biological replicate 2, technical replicate 1	iBAQ TOT_2.1_GIL1649	TOT_2.1_GIL1649
	TOTAL (fraction S7; RIPA-soluble), biological replicate 2, technical replicate 2	iBAQ TOT_2.2_GIL1649	TOT_2.2_GIL1649
	TOTAL (fraction S7; RIPA-soluble), biological replicate 2, technical replicate 3	iBAQ TOT_2.3_GIL1649	TOT_2.3_GIL1649
	TOTAL (fraction S7; RIPA-soluble), biological replicate 3, technical replicate 1	iBAQ TOT_3.1_GIL1651	TOT_3.1_GIL1651
	TOTAL (fraction S7; RIPA-soluble), biological replicate 3, technical replicate 2	iBAQ TOT_3.2_GIL1651	TOT_3.2_GIL1651
	TOTAL (fraction S7; RIPA-soluble), biological replicate 3, technical replicate 3	iBAQ TOT_3.3_GIL1651	TOT_3.3_GIL1651
Column Headers:	#	Header	Description	Hidden?
	1	MaxQuant ID	MaxQuant IDs for all proteins grouped together in Mathematica analysis	No
	2	Protein IDs	IDs for all proteins grouped together in Mathematica analysis	No
	3	Protein symbols	Symbols for all proteins grouped together in Mathematica analysis	Yes
	4	Majority protein IDs	IDs for the majority of the protein IDs	Yes
	5	Redundant groups sharing any peptides	Redundant groups sharing any peptides	Yes
	6	Redundant groups sharing >20% peptides	Redundant groups sharing >20% peptides	Yes
	7	Molecular mass	Molecular mass (Da)	No
	8	Best protein identifier	Identified protein or protein with most identifications if part of a group	No
	9	Best protein description	Descriptive summary of protein	No
	10	Best protein symbol	Protein symbol (all caps, non-italicized gene name in almost all cases)	No
	11	iBAQ	Summed iBAQ for all groups	Yes
	12	iBAQ CON_1_GIL1467	iBAQ for sample biological 1, technical replicate 1	Yes
	13	iBAQ CON_2.1_GIL1649	iBAQ for sample biological 2, technical replicate 1	Yes
	14	iBAQ CON_2.2_GIL1649	iBAQ for sample biological 2, technical replicate 2	Yes
	15	iBAQ CON_2.3_GIL1649	iBAQ for sample biological 2, technical replicate 3	Yes
	16	iBAQ CON_3.1_GIL1651	iBAQ for sample biological 3 technical replicate 1	Yes
	17	iBAQ CON_3.2_GIL1651	iBAQ for sample biological 3 technical replicate 2	Yes
	18	CON count	Number of control immunoprcipitation samples protein identified in	No
	19	iBAQ 138-1 1 GIL1467	iBAQ for sample biological 1, technical replicate 1	Yes
	20	iBAQ 138-1 2.1 GIL1649	iBAQ for sample biological 2, technical replicate 1	Yes
	21	iBAQ 138-1 2.2 GIL1649	iBAQ for sample biological 2, technical replicate 2	Yes
	22	iBAQ 138-1 2.3 GIL1649	iBAQ for sample biological 2, technical replicate 3	Yes
	23	iBAQ 138-1 3.1 GIL1651	iBAQ for sample biological 3 technical replicate 1	Yes
	24	iBAQ 138-1 3.2 GIL1651	iBAQ for sample biological 3 technical replicate 2	Yes
	25	riBAQ 138-1 1 GIL1467	riBAQ for sample biological 1, technical replicate 1	Yes
	26	riBAQ 138-1 2.1 GIL1649	riBAQ for sample biological 2, technical replicate 1	Yes
	27	riBAQ 138-1 2.2 GIL1649	riBAQ for sample biological 2, technical replicate 2	Yes
	28	riBAQ 138-1 2.3 GIL1649	riBAQ for sample biological 2, technical replicate 3	Yes
	29	riBAQ 138-1 3.1 GIL1651	riBAQ for sample biological 3 technical replicate 1	Yes
	30	riBAQ 138-1 3.2 GIL1651	riBAQ for sample biological 3 technical replicate 2	Yes
	31	138-1 count	Number of 138-1 immunoprcipitation samples protein identified in	No
	32	138-1 riBAQ average	Mean for all 138-1 samples	No
	33	SD	Standard deviation	No
	34	SEM	Standard error	No
	35	Stoichiometry re: MYO7A	riBAQ for protein divided by riBAQ for MYO7A	No
	36	± SEM	SEM	No
	37	iBAQ TOT_2.1_GIL1649	iBAQ for sample biological 2, technical replicate 1	Yes
	38	iBAQ TOT_2.2_GIL1649	iBAQ for sample biological 2, technical replicate 2	Yes
	39	iBAQ TOT_2.3_GIL1649	iBAQ for sample biological 2, technical replicate 3	Yes
	40	iBAQ TOT_3.1_GIL1651	iBAQ for sample biological 3, technical replicate 1	Yes
	41	iBAQ TOT_3.2_GIL1651	iBAQ for sample biological 3 technical replicate 2	Yes
	42	iBAQ TOT_3.3_GIL1651	iBAQ for sample biological 3 technical replicate 3	Yes
	43	riBAQ TOT_2.1_GIL1649	riBAQ for sample biological 2, technical replicate 1	Yes
	44	riBAQ TOT_2.2_GIL1649	riBAQ for sample biological 2, technical replicate 2	Yes
	45	riBAQ TOT_2.3_GIL1649	riBAQ for sample biological 2, technical replicate 3	Yes
	46	riBAQ TOT_3.1_GIL1651	riBAQ for sample biological 3, technical replicate 1	Yes
	47	riBAQ TOT_3.2_GIL1651	riBAQ for sample biological 3 technical replicate 2	Yes
	48	riBAQ TOT_3.3_GIL1651	riBAQ for sample biological 3 technical replicate 3	Yes
	49	Stoichiometry SORT ≥4	Sorting by this column allows ordering by descending stoichiometry (detection in at least four 138-1 runs)	No
	50	Adjusted stoichiometry re: MYO7A	If TOTAL for this protein is greater than TOTAL for MYO7A, then no adjustment; if less than TOTAL for MYO7A, then equal to apparent stoichiometry multiplied by MYO7A(TOTAL)/protein(TOTAL)	No
	51	Adjusted stoichiometry re: MYO7A SORT ≥4	Sorting by this column allows ordering by descending adjusted stoichiometry (detection in at least four 138-1 runs)	No
	52	Adjusted stoichiometry re: MYO7A SORT ≥2	Sorting by this column allows ordering by descending adjusted stoichiometry (detection in at least two 138-1 runs)	No
	53	TOT count	Number of TOTAL samples protein identified in	No
	54	TOT riBAQ average	Mean for all TOTAL samples	No
	55	TOT riBAQ SD	Standard deviation	No
	56	TOT riBAQ SEM	Standard error	No
	57	Enrichment 138-1/TOT	riBAQ for 138-1 immunoprecipitation divided by riBAQ for TOTAL	No
	58	Error	Propagated error	No
	59	Adjusted enrichment	If TOTAL for this protein is less than TOTAL for MYO7A, then no adjustment; if greater than TOTAL for MYO7A, then equal protein(138-1)/MYO7A(138-1)	No
	60	138-1 ≥4, CON=0 SORT	Sorting by this column allows ordering by descending adjusted stoichiometry (detection in at least four 138-1 runs, and not at all in control immunoprecipitations)	No
	61	138-1 ≥2, CON=0 SORT	Sorting by this column allows ordering by descending adjusted stoichiometry (detection in at least two 138-1 runs, and not at all in control immunoprecipitations)	No
	62	t-value	Empirical Bayes T statistics for coefficient	No
	63	p-value	p-value	No
	64	FDR p-value	p-value, adjusted for multiple tests	No

## Sheet: Data
																		7.40447e+07	2.70394e+07	9.86993e+07	2.3636e+07	4.33586e+07	2.73754e+07								MYO7A	0.122997		0.0232944		1.42126e+09	1.55409e+09	2.0073e+09	5.18569e+09	4.98428e+09	5.14207e+09
																	CON IP													138-1 immunoprecipitation
MaxQuant ID	Protein IDs	Protein symbols	Majority protein IDs	Redundant groups sharing any peptides	Redundant groups sharing >20% peptides	Molecular mass	Best protein identifier	Best protein description	Best protein symbol	iBAQ	iBAQ CON_1_GIL1467	iBAQ CON_2.1_GIL1649	iBAQ CON_2.2_GIL1649	iBAQ CON_2.3_GIL1649	iBAQ CON_3.1_GIL1651	iBAQ CON_3.2_GIL1651	CON count	iBAQ 138-1 1 GIL1467	iBAQ 138-1 2.1 GIL1649	iBAQ 138-1 2.2 GIL1649	iBAQ 138-1 2.3 GIL1649	iBAQ 138-1 3.1 GIL1651	iBAQ 138-1 3.2 GIL1651	riBAQ 138-1 1 GIL1467	riBAQ 138-1 2.1 GIL1649	riBAQ 138-1 2.2 GIL1649	riBAQ 138-1 2.3 GIL1649	riBAQ 138-1 3.1 GIL1651	riBAQ 138-1 3.2 GIL1651	138-1 count	138-1 riBAQ average	SD	SEM	Stoichio-metry re: MYO7A	SEM	iBAQ TOT_2.1_GIL1649	iBAQ TOT_2.2_GIL1649	iBAQ TOT_2.3_GIL1649	iBAQ TOT_3.1_GIL1651	iBAQ TOT_3.2_GIL1651	iBAQ TOT_3.3_GIL1651	riBAQ TOT_2.1_GIL1649	riBAQ TOT_2.2_GIL1649	riBAQ TOT_2.3_GIL1649	riBAQ TOT_3.1_GIL1651	riBAQ TOT_3.2_GIL1651	riBAQ TOT_3.3_GIL1651	Stoichio-metry SORT ≥4	Adjusted stoichio-metry re: MYO7A
1394	ENSGALP00000026663;ENSGALP00000022963;ENSGALP00000022964	HADHB;SMC1B	ENSGALP00000026663	1394	1394	20652	ENSGALP00000000815	Myosin, light chain 4, alkali; atrial, embryonic	MYL4	2231700	0	0	0	0	0	0	0	70271	224090	1061800	191290	307600	376650	0.000949035	0.00828754	0.0107579	0.00809315	0.00709433	0.0137587	6	0.00815678	0.00427198	0.00174403	0.0663168	0.015078	0	0	0	0	0	0							6	0.0663168
1584	ENSGALP00000037676	FSCN2	ENSGALP00000037676	1584	1584	153770	ENSGALP00000015632	Myosin IIIB	MYO3B	154150	0	0	0	0	0	0	0	18118	58766	57283	16720	3260.6	0	0.00024469	0.00217335	0.000580379	0.000707395	7.52008e-05		5	0.000756202	0.000831716	0.000339547	0.00614813	0.0030686	0	0	0	0	0	0							31	0.00614813
1064	ENSGALP00000019247	GRIN2B	ENSGALP00000019247	1064	1064	193450	ENSGALP00000027304	LIM domain 7	LMO7	47148	0	0	0	0	0	0	0	30423	0	3237.4	1679.3	9505.4	2303.4	0.000410873		3.28007e-05	7.10483e-05	0.000219228	8.41413e-05	5	0.000163618	0.000155102	6.33201e-05	0.00133026	0.00057509	0	0	0	0	0	0							47	0.00133026
970	ENSGALP00000017341	HNRNPU	ENSGALP00000017341	970	970	17583	ENSGALP00000012941	Calmodulin-like 4	CALML4	863730	0	0	0	0	0	0	0	0	58528	584550	124750	95903	0		0.00216455	0.00592254	0.00527796	0.00221186		4	0.00389422	0.00198754	0.000811409	0.0316611	0.00861794	0	0	0	0	0	0							11	0.0316611
1503	ENSGALP00000033875	TJP1	ENSGALP00000033875	1503	1503	54832	ENSGALP00000037676	Fascin 2	FSCN2	169100	0	0	0	0	0	0	0	7223.4	0	128450	15835	17589	0	9.75546e-05		0.00130143	0.000669952	0.000405664		4	0.00061865	0.000511769	0.000208929	0.00502978	0.00213423	0	0	0	0	0	0							34	0.00502978
552	ENSGALP00000009577	SEC61A1	ENSGALP00000009577	552	552	251050	ENSGALP00000001044	Myosin VIIA	MYO7A	36715000	0	0	0	0	0	0	0	10314000	3844300	12436000	3092900	3390700	3325000	0.139294	0.142174	0.125999	0.130855	0.0782013	0.12146	6	0.122997	0.0232944	0.00950989	1	0.109344	38596	2747.8	44694	74995	74686	77288	2.71562e-05	1.7681e-06	2.22657e-05	1.44619e-05	1.49843e-05	1.50305e-05	1	1
621	ENSGALP00000010809	TOLLIP	ENSGALP00000010809	621	621	93220	XP_003641537.1	PDZ domain containing 7	PDZD7	489350	0	0	0	0	0	0	0	26647	35247	251950	48602	65582	54847	0.000359877	0.00130354	0.0025527	0.00205627	0.00151255	0.00200352	6	0.00163141	0.000762387	0.000311243	0.0132638	0.0027304	0	0	0	0	6472.7	0					1.29862e-06		18	0.162852
765	ENSGALP00000013355	RPL30	ENSGALP00000013355	765	765	119910	ENSGALP00000008213	Myosin IH	MYO1H	1622300	0	0	0	0	0	0	0	231280	166960	883860	144970	89414	55507	0.00312352	0.00617469	0.00895508	0.00613343	0.0020622	0.00202763	6	0.00474609	0.00278953	0.00113882	0.038587	0.00972771	20020	0	19682	0	0	10577	1.40861e-05		9.80519e-06			2.05695e-06	8	0.0711318
1689	ENSGALP00000041095;ENSGALP00000042102	NONE;TRIOBP	ENSGALP00000041095;ENSGALP00000042102	1689	1689	114460	ENSGALP00000001872	Ankyrin repeat domain 24	ANKRD24	209410	0	0	0	0	0	0	0	56573	11381	91924	6860	19081	9980	0.000764038	0.000420904	0.000931354	0.000290235	0.000440074	0.000364561	6	0.000535195	0.000253197	0.000103367	0.00435127	0.000905242	0	2411.9	0	0	0	11198		1.55197e-06				2.17772e-06	33	0.0372035
739	ENSGALP00000012941	CALML4	ENSGALP00000012941	739	739	147580	ENSGALP00000025573	Myosin VI	MYO6	28341000	0	0	0	0	0	0	0	4206100	2064000	10621000	1483400	1026300	1065800	0.0568049	0.0763331	0.10761	0.0627601	0.02367	0.0389328	6	0.0610184	0.0293556	0.0119844	0.496096	0.104714	1009800	785120	1415100	1463600	1687400	1513000	0.000710497	0.000505195	0.000704975	0.000282238	0.000338545	0.000294239	3	0.496096
469	ENSGALP00000007959	MYO15A	ENSGALP00000007959	469	469	32849	ENSGALP00000036676	Glutaredoxin, cysteine rich 1	GRXCR1	431110	0	0	0	0	0	0	0	0	0	224350	51093	42109	75203			0.00227307	0.00216166	0.00097118	0.0027471	4	0.00203825	0.00075531	0.000308354	0.0165715	0.0034482	0	0	38349	0	0	0			1.91047e-05				20	0.0165715
968	ENSGALP00000017293;ENSGALP00000041444	SCCPDH	ENSGALP00000017293;ENSGALP00000041444	968	968	35373	ENSGALP00000043100	GIPC PDZ domain containing family, member 3	GIPC3	1063500	0	0	0	0	0	0	0	86525	0	558400	146650	0	39277	0.00116855		0.00565759	0.00620451		0.00143476	4	0.00361635	0.00268429	0.00109586	0.0294019	0.0112616	0	0	108820	0	123780	0			5.4212e-05		2.48341e-05		13	0.0294019
1393	ENSGALP00000026633	HADHA	ENSGALP00000026633	1393	1393	85803	ENSGALP00000000916	Espin	ESPN	632280	0	0	0	0	0	0	0	37710	53693	135100	71165	36818	31694	0.000509287	0.00198573	0.0013688	0.00301087	0.000849151	0.00115776	6	0.00148027	0.000900643	0.000367686	0.012035	0.00313086	40121	29183	50722	49094	43700	53283	2.82292e-05	1.87781e-05	2.52687e-05	9.46721e-06	8.76757e-06	1.03622e-05	19	0.012035
1403	ENSGALP00000027030	RPL31	ENSGALP00000027030	1403	1403	16578	ENSGALP00000039262	Myosin light chain 1, skeletal muscle isoform	MYL1	1054300	0	0	0	0	0	0	0	65248	90719	202230	152840	0	115880	0.000881197	0.00335507	0.00204895	0.0064664		0.004233	5	0.00339692	0.00213708	0.000872458	0.0276179	0.00811479	0	0	0	173960	0	253410				3.35462e-05		4.92817e-05	10	0.0276179
1115	ENSGALP00000020470	TOM1	ENSGALP00000020470	1115	1115	118820	ENSGALP00000000954	Myosin ID	MYO1D	230110	0	0	0	0	0	0	0	25147	9718	74233	5494.8	23413	0	0.000339619	0.000359402	0.000752113	0.000232476	0.000539985		5	0.000444719	0.000204291	8.34014e-05	0.00361568	0.000803446	0	0	15247	28790	19948	28117			7.59576e-06	5.55182e-06	4.00218e-06	5.46803e-06	35	0.0101955
1231	ENSGALP00000023281	NOP2	ENSGALP00000023281	1231	1231	81854	ENSGALP00000030293	Collectin sub-family member 12	COLEC12	2619700	0	0	0	0	0	0	0	77621	22774	175930	50427	385050	365330	0.0010483	0.000842253	0.00178249	0.00213348	0.00888059	0.0133452	6	0.00467205	0.00520631	0.00212547	0.037985	0.0175284	78370	116140	140030	268990	413770	525280	5.51413e-05	7.47317e-05	6.97602e-05	5.18716e-05	8.3015e-05	0.000102153	9	0.037985
1693	ENSGALP00000041159	RPS16	ENSGALP00000041159	1693	1693	74637	ENSGALP00000017765	Xin actin-binding repeat-containing protein 2	XIRP2	2945100	0	0	0	0	0	0	0	64468	57654	612800	191910	228470	245360	0.000870663	0.00213222	0.00620876	0.00811939	0.00526931	0.0089628	6	0.00526052	0.00321982	0.00131449	0.0427694	0.011187	240160	305280	309200	214840	315450	159480	0.000168977	0.000196436	0.000154037	4.14294e-05	6.3289e-05	3.10147e-05	7	0.0427694
535	ENSGALP00000009244	AVIL	ENSGALP00000009244	535	535	85113	ENSGALP00000009946	LIM domain and actin binding 1	LIMA1	224470	0	0	0	0	0	0	0	5577.9	0	29835	16478	15423	0	7.53315e-05		0.000302282	0.000697156	0.000355708		4	0.000357619	0.000256929	0.000104891	0.00290754	0.00108013	15544	4182.1	19944	56958	30405	30122	1.09368e-05	2.69102e-06	9.93571e-06	1.09837e-05	6.10018e-06	5.85795e-06	40	0.00598114
811	ENSGALP00000014265	RAB1A	ENSGALP00000014265	811;1726	811	118880	ENSGALP00000004265	Myosin IC	MYO1C	345890	0	0	0	0	0	0	0	15912	14688	87345	6629.4	0	0	0.000214897	0.000543207	0.000884961	0.000280479			4	0.000480886	0.000304452	0.000124292	0.00390973	0.00129183	21557	23220	13928	60261	55763	46589	1.51675e-05	1.49412e-05	6.93866e-06	1.16206e-05	1.11878e-05	9.06036e-06	37	0.00542734
1692	ENSGALP00000041153	KRTX	ENSGALP00000041153	945;1692	1692	108840	ENSGALP00000008589	Sorbin and SH3 domain containing 1	SORBS1	184190	0	0	0	0	0	0	0	12317	4762.8	0	3606.1	11021	6283.8	0.000166345	0.000176143		0.000152568	0.000254183	0.000229542	5	0.000195756	4.37893e-05	1.78769e-05	0.00159155	0.000208617	8368.8	0	11443	19176	87731	19477	5.8883e-06		5.70068e-06	3.69787e-06	1.76015e-05	3.78777e-06	46	0.00345952
143	ENSGALP00000002263	NDRG3	ENSGALP00000002263	143	143	137090	ENSGALP00000021860	Sorbin and SH3 domain containing 2	SORBS2	434380	0	0	0	0	0	0	0	14035	10837	24964	8407.7	4237.6	0	0.000189548	0.000400786	0.00025293	0.000355715	9.77338e-05		5	0.000259343	0.000122804	5.01347e-05	0.00210852	0.000480902	31030	17818	0	109290	102900	110860	2.18328e-05	1.14652e-05		2.10753e-05	2.06449e-05	2.15594e-05	42	0.00210852
197	ENSGALP00000003143	COMT	ENSGALP00000003143	197	197	308050	ENSGALP00000017773	Protein tyrosine phosphatase, receptor type, Q	PTPRQ	1043800	0	0	0	0	0	0	0	16663	8017	40262	0	6487.5	0	0.00022504	0.000296493	0.000407926		0.000149624		4	0.000269771	0.000109905	4.48683e-05	0.00219331	0.000492693	84795	46913	79829	225410	267490	267940	5.96619e-05	3.01867e-05	3.97693e-05	4.34677e-05	5.36667e-05	5.21074e-05	45	0.00219331
493	ENSGALP00000008299	FAM120A	ENSGALP00000008299	493	493	16706	ENSGALP00000042446	Calmodulin 1 (phosphorylase kinase, delta)	CALM	20522000	0	0	0	0	0	0	0	0	114670	304310	143460	71674	0		0.00424085	0.0030832	0.00606955	0.00165305		4	0.00376166	0.00186749	0.000762398	0.0305833	0.00812522	829700	663950	944410	6195600	6021200	5233000	0.000583778	0.000427227	0.000470487	0.00119475	0.00120804	0.00101768	12	0.0305833
41	ENSGALP00000000261	DAD1	ENSGALP00000000261	41	41	272380	ENSGALP00000013240	Spectrin, beta, non-erythrocytic 1	SPTBN1	11264000	0	0	0	0	0	0	0	299470	27518	181460	31446	64892	69853	0.00404445	0.0010177	0.00183851	0.00133043	0.00149664	0.00255167	6	0.00204657	0.0011103	0.000453277	0.0166391	0.00390336	593210	452110	767680	2857600	2779700	3139100	0.000417384	0.000290916	0.000382443	0.000551055	0.000557694	0.000610474	15	0.0166391
986	ENSGALP00000017773	PTPRQ	ENSGALP00000017773	986	986	75142	ENSGALP00000019975_family	Family {DEAD (Asp-Glu-Ala-Asp) box helicase 17}	DDX17;DDX5	1437451	0	0	0	0	0	0	0	13925	3788	33643	10198	6139.7	5743	0.000188062	0.000140092	0.000340864	0.00043146	0.000141603	0.000209787	6	0.000241978	0.00011839	4.83325e-05	0.00196734	0.00042137	114710	107963	89705	392383	338904	320380	8.07101e-05	6.94701e-05	4.46893e-05	7.56665e-05	6.79946e-05	6.23056e-05	39	0.00196734
1072	ENSGALP00000019402	CTNNB1	ENSGALP00000019402	1072;1444	1072	33923	ENSGALP00000007680	Ribosomal protein L6	RPL6	8409200	0	0	0	0	0	0	0	115230	0	178440	28373	0	36042	0.00155622		0.00180792	0.00120041		0.00131658	4	0.00147028	0.000269465	0.000110009	0.0119538	0.0015752	728970	806800	918580	1923800	1640800	2032300	0.000512904	0.000519145	0.000457619	0.000370983	0.000329195	0.00039523	27	0.0119538
1438	ENSGALP00000035584;ENSGALP00000027953	RPS3	ENSGALP00000027953;ENSGALP00000035584	1438	1438	229040	ENSGALP00000023352	Myosin, heavy chain 10, non-muscle	MYH10	6335200	0	0	0	0	0	0	0	176080	8542.5	143860	27362	20543	7540.5	0.00237802	0.000315928	0.00145756	0.00115764	0.000473793	0.000275448	6	0.00100973	0.000824914	0.00033677	0.00820939	0.00281064	523990	427840	666270	1419500	1524600	1389100	0.00036868	0.000275299	0.000331923	0.000273734	0.000305882	0.000270144	26	0.00820939
86	ENSGALP00000001044	MYO7A	ENSGALP00000001044	86;183	86	277140	ENSGALP00000035478	Filamin B, beta	FLNB	1524500	0	0	0	0	0	0	0	48715	2001.6	18339	3960	3267.7	0	0.000657913	7.40253e-05	0.000185807	0.000167541	7.53645e-05		5	0.00023213	0.000243506	9.94111e-05	0.00188728	0.000899695	132120	91211	98841	331190	380210	414620	9.29598e-05	5.86908e-05	4.92407e-05	6.38662e-05	7.62819e-05	8.06329e-05	44	0.00188728
578	ENSGALP00000010031	KIF1A	ENSGALP00000010031	578	578	22314	ENSGALP00000016629	Peroxiredoxin 1	PRDX1	10470000	0	0	0	0	0	0	0	0	47374	92972	56600	36052	34565		0.00175204	0.000941973	0.00239465	0.000831485	0.00126263	5	0.00143655	0.000643903	0.000262872	0.0116796	0.00254162	576590	340450	662660	3048200	2331500	3243300	0.00040569	0.000219067	0.000330124	0.00058781	0.000467771	0.000630738	22	0.0116796
917	ENSGALP00000042446;ENSGALP00000016260;ENSGALP00000039444	CALM;CALM2;CALML3	ENSGALP00000016260;ENSGALP00000042446	917	917	28022	ENSGALP00000026126	Ribosomal protein L8	RPL8	7949700	0	0	0	0	0	0	0	18560	32894	228450	45079	48041	0	0.000250659	0.00121652	0.00231461	0.00190722	0.00110799		5	0.0013594	0.000794583	0.000324387	0.0110523	0.00303695	880650	1012900	964850	1164800	1252800	2300600	0.000619627	0.000651763	0.000480669	0.000224618	0.00025135	0.000447407	24	0.0110523
324	ENSGALP00000005497	LMTK2	ENSGALP00000005497	324	324	74994	ENSGALP00000017341	Heterogeneous nuclear ribonucleoprotein U (scaffold attachment factor A)	HNRNPU	4983600	0	0	0	0	0	0	0	0	28901	97683	27843	13454	11064		0.00106885	0.000989703	0.00117799	0.000310296	0.000404159	5	0.000790199	0.000402232	0.000164211	0.00642453	0.00156045	652190	509050	706920	952350	764540	1219600	0.000458882	0.000327554	0.000352174	0.00018365	0.00015339	0.000237181	30	0.00642453
1165	ENSGALP00000021708;ENSGALP00000006993;ENSGALP00000021453	PCBP1;PCBP2;PCBP3	ENSGALP00000006993;ENSGALP00000021708	1165	1165	285320	ENSGALP00000038979	Spectrin, alpha, non-erythrocytic 1 (alpha-fodrin)	SPTAN1	15526000	0	0	0	0	0	0	0	118490	19491	121440	30851	39893	34741	0.00160025	0.000720837	0.0012304	0.00130525	0.000920071	0.00126906	6	0.00117431	0.000310151	0.000126619	0.00954747	0.00126676	771410	506890	926720	4006100	4350700	4599500	0.000542765	0.000326164	0.000461674	0.00077253	0.000872885	0.000894484	23	0.00954747
121	ENSGALP00000001872	ANKRD24	ENSGALP00000001872	121	121	12926	ENSGALP00000000261	Defender against cell death 1	DAD1	35981000	0	0	0	0	0	0	0	0	0	190440	135720	64430	105320			0.0019295	0.00574208	0.00148598	0.00384725	4	0.0032512	0.0019513	0.000796613	0.0264331	0.00831784	2706300	3299100	3527800	5520400	5856600	14575000	0.00190416	0.00212285	0.00175748	0.00106455	0.00117501	0.00283446	14	0.0264331
330;1091	ENSGALP00000005576;ENSGALP00000019975	DDX17;DDX5	ENSGALP00000019975;ENSGALP00000005576	330;1091	330;1091	29149	ENSGALP00000035815_family	Family {Solute carrier family 25 (mitochondrial carrier; adenine nucleotide translocator), member 6}	SLC25A6;SLC25A4;SLC25A5	126746500	0	0	0	0	0	0	0	66095	243273	986802	240110	433828	390050	0.000892636	0.00899698	0.00999807	0.0101586	0.0100056	0.0142482	6	0.00905002	0.00439563	0.00179451	0.0735791	0.0156597	6597390	7449840	8950240	35698400	33768200	31928100	0.00464193	0.00479369	0.00445884	0.00688403	0.00677494	0.00620919	5	0.0735791
1660	ENSGALP00000040238	ANK3	ENSGALP00000040238	1083;1660	1660	132980	ENSGALP00000007703_family	Family {ATPase, Ca++ transporting, plasma membrane 2}	ATP2B2;ATP2B1;ATP2B4	19106000	0	0	0	0	0	0	0	9692.5	19181	116970	16074	65830	54018	0.000130901	0.000709372	0.00118512	0.000680064	0.00151827	0.00197323	6	0.00103283	0.000661172	0.000269923	0.00839715	0.00228857	1217681	954538	1519310	4720830	5193590	5218130	0.000856762	0.000614209	0.000756891	0.000910358	0.00104199	0.00101479	25	0.00839715
1379	ENSGALP00000026322	FER1L6	ENSGALP00000026322	1379	1379	95920	ENSGALP00000000422	Neurofilament, medium polypeptide	NEFM	16197000	0	0	0	0	0	0	0	0	7359.1	130630	25655	27049	10467		0.000272162	0.00132352	0.00108542	0.000623844	0.000382351	5	0.000737458	0.000452783	0.000184848	0.00599573	0.00172285	1692100	1398800	2290800	3105100	3305800	4202800	0.00119056	0.000900074	0.00114123	0.000598783	0.000663245	0.000817336	32	0.00599573
1246	ENSGALP00000023576	GPR98	ENSGALP00000023576	1246	1246	15388	ENSGALP00000042290	Histone H3.2	H3-I	896700000	0	0	0	0	0	0	0	303810	0	0	357570	2540700	3027300	0.00410306			0.0151282	0.0585974	0.110585	4	0.0471033	0.0484198	0.0197673	0.382963	0.200146	120170000	140080000	144020000	88530000	114840000	282840000	0.0845518	0.0901361	0.071748	0.017072	0.0230404	0.0550051	4	0.382963
1342	ENSGALP00000025573	MYO6	ENSGALP00000025573	1342	1342	35076	ENSGALP00000000170	Guanine nucleotide binding protein (G protein), beta polypeptide 2-like 1	GNB2L1	13552000	0	0	0	0	0	0	0	0	0	47975	7467.1	31768	13615			0.000486073	0.00031592	0.000732681	0.000497345	4	0.000508005	0.000171241	6.99088e-05	0.00413021	0.000798464	984650	598590	1308700	3055900	3407200	4096400	0.000692801	0.00038517	0.000651969	0.000589295	0.000683589	0.000796644	36	0.00413021
573	ENSGALP00000009976	USH1C	ENSGALP00000009976	573	573	85479	ENSGALP00000019402	Catenin (cadherin-associated protein), beta 1, 88kDa	CTNNB1	8705800	0	0	0	0	0	0	0	16320	5703.6	33223	5132.9	0	13524	0.000220407	0.000210937	0.000336608	0.000217164		0.000494021	5	0.000295827	0.000122501	5.00109e-05	0.00240516	0.000489784	427330	382530	746360	2392000	2536200	2147400	0.00030067	0.000246143	0.000371822	0.00046127	0.00050884	0.000417614	38	0.00240516
1562	ENSGALP00000036676	GRXCR1	ENSGALP00000036676	1562	1562	11815	ENSGALP00000011647	Cytochrome c oxidase subunit VIa polypeptide 1	COX6A1	113670000	0	0	0	0	0	0	0	0	0	291450	79575	75548	82225			0.00295291	0.00336668	0.0017424	0.00300361	4	0.0027664	0.0007071	0.000288672	0.0224916	0.00357752	8383200	6314300	11983000	25154000	27343000	33960000	0.00589843	0.00406301	0.0059697	0.00485066	0.00548585	0.00660434	16	0.0224916
152	ENSGALP00000042072;ENSGALP00000002382	NFS1	ENSGALP00000002382;ENSGALP00000042072	152	152	50849	ENSGALP00000026663	Hydroxyacyl-CoA dehydrogenase/3-ketoacyl-CoA thiolase/enoyl-CoA hydratase (trifunctional protein), beta subunit	HADHB	53394000	0	0	0	0	0	0	0	86609	8366.2	85136	0	46370	42649	0.00116969	0.000309408	0.00086258		0.00106945	0.00155793	5	0.000993812	0.000458398	0.00018714	0.00807995	0.00180175	2568600	1626000	3699200	14557000	14681000	15993000	0.00180727	0.00104627	0.00184287	0.00280715	0.00294546	0.00311023	28	0.00807995
985	ENSGALP00000017765	XIRP2	ENSGALP00000017765	985	985	229830	ENSGALP00000026707	Otoferlin	OTOF	8186300	0	0	0	0	0	0	0	0	2533.8	17551	1319.5	0	3948.3		9.37077e-05	0.000177823	5.58258e-05		0.000144228	4	0.000117896	5.3921e-05	2.20131e-05	0.000958527	0.000237246	532510	337080	681310	2288600	2200300	2121100	0.000374675	0.000216898	0.000339415	0.00044133	0.000441448	0.000412499	48	0.000958527
71	ENSGALP00000000815	MYL4	ENSGALP00000000815	71	71	48579	ENSGALP00000003914	Ubiquinol-cytochrome c reductase core protein II	UQCRC2	72376000	0	0	0	0	0	0	0	0	19467	108850	30342	0	23543		0.00071995	0.00110285	0.00128372		0.000860006	4	0.00099163	0.000250878	0.000102421	0.00806221	0.00127395	4654500	4066100	6442300	19297000	18595000	19139000	0.00327491	0.00261638	0.00320943	0.0037212	0.00373073	0.00372204	29	0.00806221
675	ENSGALP00000011647	COX6A1	ENSGALP00000011647	675	675	46854	ENSGALP00000017293	Saccharopine dehydrogenase (putative)	SCCPDH	204260000	0	0	0	0	0	0	0	12601	103550	0	67013	59034	60766	0.000170181	0.0038296		0.00283521	0.00136153	0.00221973	5	0.00208325	0.00139772	0.000570618	0.0169374	0.00528066	13968000	9645100	16777000	52443000	57262000	53864000	0.00982791	0.00620625	0.00835797	0.010113	0.0114885	0.0104752	17	0.0169374
1470	ENSGALP00000030639;ENSGALP00000042154	RAB6A;RAB6B	ENSGALP00000030639	1470	1470	60667	ENSGALP00000009487	Ribophorin I	RPN1	30170000	0	0	0	0	0	0	0	28272	6583.7	0	7909.3	12139	0	0.000381823	0.000243485		0.000334629	0.000279968		4	0.000309976	6.08038e-05	2.4823e-05	0.00252019	0.000343582	2131900	1517500	3085200	7672000	8182300	7526700	0.00150001	0.000976453	0.00153699	0.00147946	0.00164162	0.00146375	43	0.00252019
713	ENSGALP00000012481	RPL4	ENSGALP00000012481	713	713	520730	ENSGALP00000017630	Low density lipoprotein receptor-related protein 2	LRP2	2927100	0	0	0	0	0	0	0	1984.1	718.98	1279.8	597.16	0	0	2.6796e-05	2.65901e-05	1.29667e-05	2.52648e-05			4	2.29044e-05	6.6598e-06	2.71885e-06	0.000186219	3.23095e-05	162980	114270	200570	809750	768650	866310	0.000114673	7.35284e-05	9.99201e-05	0.000156151	0.000154215	0.000168475	49	0.000186219
1257	ENSGALP00000023936	HMGCS1	ENSGALP00000023936	1257	1257	112090	ENSGALP00000024150	ATPase, Na+/K+ transporting, alpha 1 polypeptide	ATP1A1	189460000	0	0	0	0	0	0	0	15339	26687	219310	30431	88672	37606	0.000207159	0.000986967	0.002222	0.00128748	0.00204508	0.00137372	6	0.00135374	0.000732912	0.00029921	0.0110062	0.0025772	13671000	12346000	18069000	45535000	50055000	49362000	0.00961894	0.00794418	0.00900162	0.0087809	0.0100426	0.00959963	21	0.0110062
586	ENSGALP00000010210	LECT2	ENSGALP00000010210	586	586	91555	ENSGALP00000020744	Heat shock protein 90kDa beta (Grp94), member 1	HSP90B1	41610000	0	0	0	0	0	0	0	4767.1	0	38360	4131	19990	6918	6.43814e-05		0.000388655	0.000174776	0.000461039	0.000252709	5	0.000268312	0.000159849	6.5258e-05	0.00218145	0.000609865	3162200	3057700	4445600	10418000	9621000	10831000	0.00222493	0.00196751	0.00221471	0.00200899	0.00193027	0.00210635	41	0.00218145
1287	ENSGALP00000024624	TOMM70A	ENSGALP00000024624	1287	1287	13680	ENSGALP00000000069	Late endosomal/lysosomal adaptor, MAPK and MTOR activator 3	LAMTOR3	1320100	0	0	0	0	0	0	0	0	0	0	0	0	0							0						0	0	0	462120	419440	438570				8.91145e-05	8.41526e-05	8.52905e-05	1000
1419	ENSGALP00000027337	LECT1	ENSGALP00000027337	1419	1419	31063	ENSGALP00000000076	Armadillo repeat containing 1 (ARMC1	ARMC1	123090	0	0	0	0	0	0	0	0	0	0	0	0	0							0						0	0	0	68918	54172	0				1.329e-05	1.08686e-05		1000
1085	ENSGALP00000019801	SEPT7_	ENSGALP00000019801	1085	1085	25304	ENSGALP00000000088	Proteasome (prosome, macropain) subunit, alpha type, 5	PSMA5	761950	0	0	0	0	0	0	0	0	0	0	0	0	0							0						56039	35618	0	214370	261810	194110	3.94291e-05	2.29188e-05		4.13388e-05	5.25272e-05	3.77494e-05	1000
274	ENSGALP00000004477;ENSGALP00000004478	CTNNA3	ENSGALP00000004477;ENSGALP00000004478	274	274	172760	ENSGALP00000000102	Scribbled planar cell polarity protein	SCRIB	163420	0	0	0	0	0	0	0	0	0	0	0	0	0							0						4930	2440.1	16358	77614	35454	26626	3.46876e-06	1.57011e-06	8.14924e-06	1.4967e-05	7.11317e-06	5.17807e-06	1000
1180	ENSGALP00000022017	MCOLN1	ENSGALP00000022017	1180	1180	63663	ENSGALP00000000135	Anthrax toxin receptor 1	ANTXR1	257000	0	0	0	0	0	0	0	0	0	0	0	0	0							0						28218	0	25921	68298	69285	65279	1.98542e-05		1.29133e-05	1.31705e-05	1.39007e-05	1.26951e-05	1000
1443	ENSGALP00000028016	ERH	ENSGALP00000028016	1443	1443	30118	ENSGALP00000000160	Proteolipid protein 1	PLP1	14677000	0	0	0	0	0	0	0	0	0	0	0	0	0							0						1728700	1886200	1882100	2136300	3622800	3420600	0.00121632	0.0012137	0.000937626	0.000411961	0.000726845	0.000665218	1000
1430	ENSGALP00000027665	ACAT1	ENSGALP00000027665	1430	1430	10803	ENSGALP00000000189	Small nuclear ribonucleoprotein polypeptide E	SNRPE	2839500	0	0	0	0	0	0	0	0	0	0	0	0	0							0						0	0	288130	1087500	756060	707770			0.000143541	0.000209712	0.000151689	0.000137643	1000
539;1346	ENSGALP00000009371;ENSGALP00000025606;ENSGALP00000036285	EEF1A1;EEF1A2	ENSGALP00000025606;ENSGALP00000036285;ENSGALP00000009371	539;1346	539;1346	21835	ENSGALP00000000205	Ribosomal protein L9	RPL9	11953000	0	0	0	0	0	0	0	0	0	107120	0	0	0			0.00108532				1	0.00108532			0.00882392	#VALUE!	714130	87785	932680	3334600	3460300	3316300	0.000502463	5.64863e-05	0.000464643	0.000643039	0.000694243	0.000644935	1000	0.00882392
1242	ENSGALP00000023410	STX1A	ENSGALP00000023410	1242	1242	51475	ENSGALP00000000220	CDP-diacylglycerol synthase (phosphatidate cytidylyltransferase) 2	CDS2	204670	0	0	0	0	0	0	0	0	0	0	0	0	0							0						0	0	0	0	145120	59540					2.91155e-05	1.1579e-05	1000
1730	ENSGALP00000041857	RAB5B	ENSGALP00000041857	316;1013;1730	1730	112700	ENSGALP00000000275	Mutated in colorectal cancers	MCC	564220	0	0	0	0	0	0	0	0	0	0	0	0	0							0						239990	0	324230	0	0	0	0.000168857		0.000161525				1000
377	ENSGALP00000006308	RPL23A	ENSGALP00000006308	377	377	62330	ENSGALP00000000304	Dihydropyrimidinase-like 2	DPYSL2	2614800	0	0	0	0	0	0	0	7922.4	0	19416	0	0	0	0.000106995		0.000196719				2	0.000151857	6.34444e-05	2.59011e-05	0.00123464	0.000400466	218570	215990	347300	506870	573480	725290	0.000153786	0.000138981	0.000173018	9.7744e-05	0.000115058	0.00014105	1000	0.00123464
1340	ENSGALP00000025531	BCKDHB	ENSGALP00000025531	1340	1340	93779	ENSGALP00000000316	Major vault protein	MVP	90886	0	0	0	0	0	0	0	0	0	0	0	0	0							0						0	0	0	39513	15862	35510				7.61963e-06	3.18241e-06	6.90578e-06	1000
93	ENSGALP00000001302	CSNK2A2	ENSGALP00000001302	93	93	131990	ENSGALP00000000333	Mannosidase, alpha, class 2A, member 1	MAN2A1	315860	0	0	0	0	0	0	0	0	0	0	0	0	0							0						0	0	0	117530	117750	80577				2.26643e-05	2.36243e-05	1.56701e-05	1000
576	ENSGALP00000010006	HM13	ENSGALP00000010006	576	576	48206	ENSGALP00000000373	Dolichyl-phosphate (UDP-N-acetylglucosamine) N-acetylglucosaminephosphotransferase 1 (GlcNAc-1-P transferase)	DPAGT1	535550	0	0	0	0	0	0	0	0	0	0	0	0	0							0						0	0	0	215170	189610	130770				4.14931e-05	3.80416e-05	2.54314e-05	1000
1015	ENSGALP00000018388	LRRC7	ENSGALP00000018388	1015	1015	163340	ENSGALP00000000383	Alpha-2-macroglobulin-like 1	A2ML1	151880	0	0	0	0	151880	0	1	0	0	0	0	0	0							0						0	0	0	0	0	0							1000
127	ENSGALP00000001957	SRRM1	ENSGALP00000001957	127	127	47408	ENSGALP00000000406	Ceramide synthase 4	CERS4	152160	0	0	0	0	0	0	0	0	0	0	0	0	0							0						0	16969	0	72643	0	62550		1.09189e-05		1.40084e-05		1.21644e-05	1000
588	ENSGALP00000010241	TMEM43	ENSGALP00000010241	588	588	30099	ENSGALP00000000410	Solute carrier family 25 (mitochondrial carrier: glutamate), member 22	SLC25A22	5519300	0	0	0	0	0	0	0	0	0	0	0	0	0							0						382340	434130	224440	1471200	1506500	1500600	0.000269015	0.000279346	0.000111812	0.000283704	0.00030225	0.000291828	1000
1722	ENSGALP00000041744	SEC22B	ENSGALP00000041744	1722	1722	43401	ENSGALP00000000419	Internexin neuronal intermediate filament protein, alpha	INA	39161000	0	0	0	0	0	0	0	0	0	93811	38181	0	0			0.000950473	0.00161537			2	0.00128292	0.000470155	0.00019194	0.0104305	0.00304251	4592500	5135900	7021700	7111900	7035100	8132000	0.00323129	0.00330476	0.00349807	0.00137145	0.00141146	0.00158146	1000	0.0104305
616	ENSGALP00000010633	SNRPD3	ENSGALP00000010633	616	616	53694	ENSGALP00000000438_family	Family {Adenosylhomocysteinase-like 1}	AHCYL1;AHCYL2	6678890	0	0	0	0	0	0	0	0	0	0	0	0	0							0						141638	34569	34903	182642	189050	6096100	9.96567e-05	2.22438e-05	1.7388e-05	3.52204e-05	3.79293e-05	0.00118553	1000
1415	ENSGALP00000027241;ENSGALP00000039199	RAP2A;RAP2C	ENSGALP00000027241;ENSGALP00000039199	1415	1415	46259	ENSGALP00000000468	Proteasome (prosome, macropain) 26S subunit, ATPase, 5	PSMC5	320570	0	0	0	0	0	0	0	0	0	0	0	0	0							0						0	8963.7	12448	127370	62358	109430		5.7678e-06	6.20135e-06	2.45618e-05	1.25109e-05	2.12813e-05	1000
1597	ENSGALP00000038234	CNPY3	ENSGALP00000038234	1597	1597	57026	ENSGALP00000000494	SWI/SNF related, matrix associated, actin dependent regulator of chromatin, subfamily d, member 2	SMARCD2	147930	0	0	0	0	0	0	0	0	0	0	0	0	0							0						12097	0	0	29080	51891	54862	8.51147e-06			5.60774e-06	1.04109e-05	1.06692e-05	1000
802	ENSGALP00000014004	PTK7	ENSGALP00000014004	802	802	76022	ENSGALP00000000509	Heterogeneous nuclear ribonucleoprotein M	HNRNPM	137480	0	0	0	0	0	0	0	0	0	0	0	0	0							0						22686	12994	39378	28477	33948	0	1.59619e-05	8.36114e-06	1.96174e-05	5.49146e-06	6.81102e-06		1000
1363	ENSGALP00000026110	MAOA	ENSGALP00000026110	1363	1363	86115	ENSGALP00000000518	Integrin, beta 3	ITGB3	93930	0	0	0	0	0	0	0	0	0	0	0	0	0							0						0	0	0	0	24326	69604					4.88055e-06	1.35362e-05	1000
178	ENSGALP00000002888	VIT2	ENSGALP00000002888	178	178	175260	ENSGALP00000000581	Lysine (K)-specific demethylase 5B	KDM5B	127460	127460	0	0	0	0	0	1	0	0	0	0	0	0							0						0	0	0	0	0	0							1000
863	ENSGALP00000015277	CAPZA2	ENSGALP00000015277	863	863	99362	ENSGALP00000000594	Endoplasmic reticulum metallopeptidase 1	ERMP1	745030	0	0	0	0	0	0	0	0	0	0	0	0	0							0						0	8894.4	43511	217180	253770	221680		5.72321e-06	2.16763e-05	4.18807e-05	5.09141e-05	4.3111e-05	1000
1589	ENSGALP00000037829	PDHX	ENSGALP00000037829	1589	1589	58983	ENSGALP00000000597	Potassium voltage-gated channel, shaker-related subfamily, member 10	KCNA10	306570	0	0	0	0	0	0	0	0	0	0	0	0	0							0						0	0	0	129210	77979	99379				2.49167e-05	1.5645e-05	1.93266e-05	1000
525	ENSGALP00000008955	SYNGR3	ENSGALP00000008955	525	525	83964	ENSGALP00000000615	Karyopherin (importin) beta 1	KPNB1	105330	0	0	0	0	0	0	0	0	0	0	0	0	0							0						0	0	0	39225	13203	52902				7.56409e-06	2.64893e-06	1.02881e-05	1000
344	ENSGALP00000005799	PIGS	ENSGALP00000005799	344	344	157870	ENSGALP00000000626	Mannose receptor, C type 2	MRC2	1576800	0	0	0	0	0	0	0	0	0	0	0	0	0							0						52940	34985	87643	490720	573700	336770	3.72487e-05	2.25115e-05	4.3662e-05	9.46297e-05	0.000115102	6.54931e-05	1000
406	ENSGALP00000006826	CGNL1	ENSGALP00000006826	406	406	67937	ENSGALP00000000639	Lamin B2	LMNB2	40135000	0	0	0	0	0	0	0	4630600	0	0	0	0	0	0.0625379						1	0.0625379			0.50845	#VALUE!	2300000	2421600	3370900	8354300	8937600	10120000	0.00161828	0.00155821	0.00167932	0.00161103	0.00179316	0.00196808	1000	0.50845
352	ENSGALP00000042686;ENSGALP00000005921	EMC3;TMEM111	ENSGALP00000005921;ENSGALP00000042686	352	352	8725.4	ENSGALP00000000643	Ribosomal protein L36	RPL36	3780800	0	0	0	0	0	0	0	0	0	0	0	0	0							0						0	206000	0	1786600	1586900	201380		0.000132553		0.000344525	0.000318381	3.91632e-05	1000
1483	ENSGALP00000031992	PSEN1	ENSGALP00000031992	1483	1483	74498	ENSGALP00000000657	Peptidyl arginine deiminase, type I	PADI1	698340	0	0	0	0	0	0	0	0	0	0	0	0	0							0						67661	37889	50489	210940	187180	144180	4.76064e-05	2.43801e-05	2.51526e-05	4.06774e-05	3.75541e-05	2.80393e-05	1000
888	ENSGALP00000015662;ENSGALP00000018239	THBS1;THBS2	ENSGALP00000015662	888	888	21455	ENSGALP00000000669	Nascent polypeptide-associated complex alpha subunit	NACA	4375900	0	0	0	0	0	0	0	0	0	0	0	0	0							0						280820	125990	338830	1171800	1226600	1231800	0.000197585	8.10698e-05	0.000168799	0.000225968	0.000246094	0.000239553	1000
1712	ENSGALP00000041510	CALR	ENSGALP00000041510	1712	1712	32588	ENSGALP00000000693	Succinate dehydrogenase [ubiquinone] iron-sulfur subunit, mitochondrial	SDHB	13858000	0	0	0	0	0	0	0	0	0	0	0	0	0							0						1112400	975290	1242800	2920400	4335700	3271500	0.000782686	0.000627562	0.000619139	0.000563166	0.000869875	0.000636222	1000
536	ENSGALP00000009286	UQCRC1	ENSGALP00000009286	536	536	19329	ENSGALP00000000734	Serine/arginine-rich splicing factor 3	SRSF3	16363000	0	0	0	0	0	0	0	0	0	0	0	0	0							0						1255300	883860	1558600	3806100	4497000	4362600	0.000883231	0.00056873	0.000776464	0.000733963	0.000902237	0.000848413	1000
1591	ENSGALP00000037906	RPL35	ENSGALP00000037906	1591	1591	61999	ENSGALP00000000775_family	Family {Solute carrier family 1 (high affinity aspartate/glutamate transporter), member 6}	SLC1A6;SLC1A3	14296000	0	0	0	0	0	0	0	0	0	0	0	0	0							0						880560	316990	1067290	4144000	3906600	3980500	0.000619563	0.000203971	0.000531703	0.000799123	0.000783785	0.000774104	1000
1482	ENSGALP00000031809	ABHD12B	ENSGALP00000031809	1482	1482	55659	ENSGALP00000000782	Coiled-coil domain containing 47	CCDC47	2059800	0	0	0	0	0	0	0	0	0	0	0	0	0							0						124410	37216	132790	655880	679170	430340	8.75351e-05	2.39471e-05	6.61534e-05	0.000126479	0.000136262	8.369e-05	1000
747	ENSGALP00000013053	ANP32A	ENSGALP00000013053	747	747	81195	ENSGALP00000000853	Cadherin 3, type 1, P-cadherin (placental)	CDH3	3790000	0	0	0	0	0	0	0	0	0	0	0	0	0							0						170390	82699	164790	1187000	1008600	1176500	0.000119887	5.32137e-05	8.20952e-05	0.000228899	0.000202356	0.000228799	1000
983	ENSGALP00000017661	USO1	ENSGALP00000017661	983	983	97754	ENSGALP00000000855	Cadherin 3, type 1, P-cadherin (placental)	CDH3	354550	0	0	0	0	0	0	0	0	0	0	0	0	0							0						0	0	0	121930	127800	104820				2.35128e-05	2.56406e-05	2.03848e-05	1000
1474	ENSGALP00000031018	COX7A2	ENSGALP00000031018	1474	1474	24521	ENSGALP00000000864_family	Family {RAB11B, member RAS oncogene family}	RAB11B;RAB11A;RAB25	17215600	0	0	0	0	0	0	0	0	0	0	0	0	0							0						1189670	1408790	1592210	3968090	4285460	4771620	0.000837054	0.000906503	0.000793208	0.0007652	0.000859796	0.000927957	1000
1819	ENSGALP00000043408	TMEM101	ENSGALP00000043408	1819	1819	63394	ENSGALP00000000889	DnaJ (Hsp40) homolog, subfamily C, member 11	DNAJC11	653700	0	0	0	0	0	0	0	0	0	0	0	0	0							0						41179	13649	13818	286060	116660	182330	2.89736e-05	8.78261e-06	6.88386e-06	5.51634e-05	2.34056e-05	3.54585e-05	1000
1845	REV__ENSGALP00000041877	REV__ENSGALP00000041877	REV__ENSGALP00000041877	1845	1845	12944	ENSGALP00000000893	NADH dehydrogenase (ubiquinone) Fe-S protein 8, 23kDa (NADH-coenzyme Q reductase)	NDUFA7	39635000	0	0	0	0	0	0	0	0	0	0	0	0	0							0						3671400	3365600	5407800	8872800	8999000	9318500	0.0025832	0.00216564	0.00269406	0.00171102	0.00180548	0.00181221	1000
1844	REV__ENSGALP00000041583	REV__ENSGALP00000041583	REV__ENSGALP00000041583	1844	1844	16185	ENSGALP00000000933	Cytochrome b5 type B (outer mitochondrial membrane)	CYB5B	48369000	0	0	0	0	0	0	0	0	0	0	0	0	0							0						2596500	1828500	3763900	13066000	13011000	14104000	0.0018269	0.00117657	0.0018751	0.00251963	0.00261041	0.00274286	1000
1744	ENSGALP00000042116	SGK196	ENSGALP00000042116	1744	1744	75719	ENSGALP00000000948	Transmembrane and coiled-coil domain family 2	TMCC2	82372	0	0	0	0	0	0	0	0	0	0	0	0	0							0						0	9930.5	0	27485	44956	0		6.3899e-06		5.30017e-06	9.01956e-06		1000
614	ENSGALP00000010625	SORL1	ENSGALP00000010625	614	614	45251	ENSGALP00000000999	Proteasome (prosome, macropain) 26S subunit, non-ATPase, 7	PSMD7	158990	0	0	0	0	0	0	0	0	0	0	0	0	0							0						0	0	39737	69669	0	49580			1.97962e-05	1.34349e-05		9.64203e-06	1000
1836	REV__ENSGALP00000018041	REV__ENSGALP00000018041	REV__ENSGALP00000018041	1836	1836	14655	ENSGALP00000001013	Ribosomal protein L22	RPL22	32482000	0	0	0	0	0	0	0	0	0	0	0	0	0							0						3057800	2488700	3110400	7230100	7312000	9282600	0.00215147	0.00160138	0.00154954	0.00139424	0.00146701	0.00180523	1000
1452;1682	ENSGALP00000028958;ENSGALP00000040966	HSD17B10	ENSGALP00000028958;ENSGALP00000040966	1452;1682	1452;1682	30797	ENSGALP00000001024	Syntaxin 12	STX12	3440600	0	0	0	0	322070	36104	2	0	0	0	0	0	0							0						144130	0	192390	928510	1002700	814640	0.00010141		9.58449e-05	0.000179052	0.000201173	0.000158426	1000
522	ENSGALP00000008908	MRPS23	ENSGALP00000008908	522	522	57142	ENSGALP00000001025	Peptidase M20 domain containing 1	PM20D1	1083200	0	0	0	0	0	0	0	0	0	0	0	0	0							0						83142	0	14749	234810	339130	411400	5.84988e-05		7.34766e-06	4.52804e-05	6.80399e-05	8.00067e-05	1000
1387	ENSGALP00000026419;ENSGALP00000026422	COL14A1	ENSGALP00000026419;ENSGALP00000026422	1387	1387	51836	ENSGALP00000001051	Sphingomyelin phosphodiesterase, acid-like 3B	SMPDL3B	469040	0	0	0	0	0	0	0	0	0	0	0	0	0							0						7500.4	0	0	90065	173930	197540	5.27729e-06			1.7368e-05	3.48957e-05	3.84164e-05	1000
1207	ENSGALP00000022733	TMEM126A	ENSGALP00000022733	1207	1207	73317	ENSGALP00000001091	Calpain 5	CAPN5	913290	0	0	0	0	0	0	0	0	0	0	0	0	0							0						29778	0	13153	299720	308530	262110	2.09518e-05		6.55257e-06	5.77976e-05	6.19006e-05	5.09736e-05	1000
1349	ENSGALP00000025681	CTNNA2	ENSGALP00000025681	1349	1349	71019	ENSGALP00000001183	Heterogeneous nuclear ribonucleoprotein R	HNRNPR	2163600	0	0	0	0	0	0	0	0	0	0	0	0	0							0						141650	107750	164960	480430	660660	608090	9.96652e-05	6.9333e-05	8.21799e-05	9.26454e-05	0.000132549	0.000118258	1000
1602	ENSGALP00000038293	ATP1B4	ENSGALP00000038293	1602	1602	11199	ENSGALP00000001233	NADH dehydrogenase (ubiquinone) 1 alpha subcomplex, 2, 8kDa	NDUFA2	16622000	0	0	0	0	0	0	0	0	0	0	0	0	0							0						1259700	858940	1805800	3862700	4330700	4504300	0.000886327	0.000552695	0.000899614	0.000744877	0.000868872	0.00087597	1000
268	ENSGALP00000004375	ACAA2	ENSGALP00000004375	268	268	53816	ENSGALP00000001251	Zinc metallopeptidase STE24	ZMPSTE24	1277900	0	0	0	0	0	0	0	0	0	0	0	0	0							0						77580	0	61334	507120	325150	306760	5.45854e-05		3.05554e-05	9.77923e-05	6.52351e-05	5.96569e-05	1000
1686	ENSGALP00000041073	MRPS35	ENSGALP00000041073	1686	1686	37926	ENSGALP00000001277	Ring finger protein 121	RNF121	347490	0	0	0	0	0	0	0	0	0	0	0	0	0							0						0	0	0	125340	105510	116640				2.41704e-05	2.11686e-05	2.26835e-05	1000
873	ENSGALP00000015476	NRCAM	ENSGALP00000015476	873	873	41191	ENSGALP00000001302	Casein kinase 2, alpha prime polypeptide	CSNK2A2	348240	0	0	0	0	0	0	0	0	0	0	0	0	0							0						0	11190	0	73562	61178	202310		7.20034e-06		1.41856e-05	1.22742e-05	3.93441e-05	1000
51	ENSGALP00000000422;ENSGALP00000041638	INA;NEFM	ENSGALP00000000422	50;51	51	39195	ENSGALP00000001315	NudC nuclear distribution protein	NUDC	91343	0	0	0	0	0	0	0	0	11306	80036	0	0	0		0.000418131	0.000810908				2	0.000614519	0.000277735	0.000113385	0.0049962	0.00173121	0	0	0	0	0	0							1000	0.0049962
771	ENSGALP00000013501	CIB1	ENSGALP00000013501	771	771	45322	ENSGALP00000001340	Carbohydrate (N-acetylglucosamine 6-O) sulfotransferase 5	CHST5	755140	0	0	0	0	0	0	0	0	0	0	0	0	0							0						39441	0	69138	208330	175730	262500	2.77508e-05		3.44432e-05	4.0174e-05	3.52569e-05	5.10495e-05	1000
1646	ENSGALP00000039731	ACE	ENSGALP00000039731	1646	1646	136950	ENSGALP00000001352	Cingulin	CGN	19215	0	0	0	0	0	0	0	0	0	0	0	0	0							0						0	0	0	6589.2	0	12625				1.27065e-06		2.45524e-06	1000
179	ENSGALP00000002903	SDF4	ENSGALP00000002903	179	179	33439	ENSGALP00000001406	Sphingomyelin phosphodiesterase 2, neutral membrane (neutral sphingomyelinase)	SMPD2	318420	0	0	0	0	0	0	0	0	0	0	0	0	0							0						0	0	0	55462	131440	131520				1.06952e-05	2.63709e-05	2.55772e-05	1000
1821	ENSGALP00000043461	EIF3K	ENSGALP00000043461	1821	1821	23121	ENSGALP00000001407	Transmembrane protein 222	TMEM222	168620	0	0	0	0	0	0	0	0	0	0	0	0	0							0						0	0	0	0	168620	0					3.38304e-05		1000
880	ENSGALP00000015565	IARS2	ENSGALP00000015565	880	880	62618	ENSGALP00000001411	Sorting nexin 27	SNX27	58690	0	0	0	0	0	0	0	0	0	0	0	0	0							0						0	0	0	41877	16813	0				8.0755e-06	3.37321e-06		1000
902	ENSGALP00000015964	RPL18A	ENSGALP00000015964	902	902	81436	ENSGALP00000001445	Uncharacterized protein	NONE	22414	22414	0	0	0	0	0	1	0	0	0	0	0	0							0						0	0	0	0	0	0							1000
472	ENSGALP00000008047	DRP2	ENSGALP00000008047	472	472	31891	ENSGALP00000001452	Uncharacterized protein	NONE	38886	0	0	0	0	0	0	0	0	0	0	0	0	0							0						0	0	38886	0	0	0			1.93722e-05				1000
266	ENSGALP00000004355	ATP1B3	ENSGALP00000004355	266	266	40464	ENSGALP00000001460_family	Family {Serine/arginine-rich splicing factor 6}	SRSF6;SRSF4;SRSF5	11423660	0	0	0	0	0	0	0	0	0	0	0	0	0							0						702210	1542000	904480	2601303	2746470	2927580	0.000494076	0.000992218	0.000450594	0.000501631	0.000551027	0.000569339	1000
1046	ENSGALP00000018929	EPB41L5	ENSGALP00000018929	1046	1046	140600	ENSGALP00000001470	Adaptor-related protein complex 3, delta 1 subunit	AP3D1	181270	0	0	0	0	0	0	0	0	0	0	0	0	0							0						0	6862.2	11956	42535	59656	60261		4.41556e-06	5.95625e-06	8.20239e-06	1.19688e-05	1.17192e-05	1000
1639	ENSGALP00000039530	HNRNPF	ENSGALP00000039530	1639	1639	72018	ENSGALP00000001474	Heat shock 70kDa protein 5 (glucose-regulated protein, 78kDa)	HSPA5	100480000	113980	0	0	20204	0	0	2	94313	0	87999	0	0	9893.9	0.00127373		0.000891587			0.000361416	3	0.000842245	0.000458154	0.000187041			8407000	7328800	11777000	23257000	24278000	25101000	0.00591518	0.0047158	0.00586707	0.00448484	0.00487092	0.0048815	1000
483	ENSGALP00000008158	SLC25A25	ENSGALP00000008158	483	483	59691	ENSGALP00000001479	Selenoprotein N, 1 (SEPN1	SEPN1	232540	0	0	0	0	0	0	0	0	0	0	0	0	0							0						0	0	0	59359	43793	129390				1.14467e-05	8.78623e-06	2.5163e-05	1000
1376	ENSGALP00000026298	MTSS1	ENSGALP00000026298	1376	1376	82648	ENSGALP00000001480	Eosinophil peroxidase	EPX	37158	0	0	0	0	0	37158	1	0	0	0	0	0	0							0						0	0	0	0	0	0							1000
1384	ENSGALP00000026392	RPS7	ENSGALP00000026392	1384	1384	80595	ENSGALP00000001483	STT3A, subunit of the oligosaccharyltransferase complex (catalytic)	STT3A	7723000	0	0	0	0	0	0	0	0	0	0	0	0	0							0						271050	322610	271940	2296500	2198100	2362700	0.000190711	0.000207587	0.000135475	0.000442854	0.000441007	0.000459484	1000
309	ENSGALP00000005231	TMED2	ENSGALP00000005231	309	309	71197	ENSGALP00000001577	Signal recognition particle receptor (docking protein)	SRPR	2238500	0	0	0	0	0	0	0	0	0	0	0	0	0							0						1340400	41447	0	313340	339100	204140	0.000943108	2.66696e-05		6.0424e-05	6.80339e-05	3.97e-05	1000
696	ENSGALP00000012134;ENSGALP00000043189;ENSGALP00000042219;ENSGALP00000042227;ENSGALP00000041220	ITFG3	ENSGALP00000012134	696	696	82176	ENSGALP00000001579	N-ethylmaleimide-sensitive factor	NSF	574430	0	0	0	0	0	0	0	0	0	0	0	0	0							0						39413	22224	11547	176560	164220	160460	2.77311e-05	1.43003e-05	5.75249e-06	3.40476e-05	3.29476e-05	3.12053e-05	1000
1747	ENSGALP00000042171	TAGLN2	ENSGALP00000042171	1747	1747	68157	ENSGALP00000001587	Gamma-glutamyltransferase 7	GGT7	351580	0	0	0	0	0	0	0	0	0	0	0	0	0							0						26899	0	31483	135560	90806	66832	1.89262e-05		1.56842e-05	2.61412e-05	1.82185e-05	1.29971e-05	1000
646	ENSGALP00000011232	PFKP	ENSGALP00000011232	646	646	73107	ENSGALP00000001595	Transmembrane protein 57 (TMEM57	TMEM57	791150	0	52654	0	108560	304340	325590	4	0	0	0	0	0	0							0						0	0	0	0	0	0							1000
368	ENSGALP00000043415;ENSGALP00000006164	SMARCE1	ENSGALP00000006164;ENSGALP00000043415	368	368	41732	ENSGALP00000001688	SH3-domain GRB2-like 1	SH3GL1	262260	0	0	0	0	0	0	0	0	0	0	0	0	0							0						0	0	0	80657	126660	54947				1.55538e-05	2.54119e-05	1.06858e-05	1000
1022	ENSGALP00000018498	HSP90AA1	ENSGALP00000018498	931;1022	1022	29896	ENSGALP00000001750	Prohibitin	PHB	36012000	0	0	0	0	0	0	0	0	0	15773	0	22754	0			0.000159809		0.000524786		2	0.000342298	0.000258078	0.00010536	0.00278297	0.00152978	2927200	2295500	3901400	8606800	8901400	9341100	0.00205958	0.00147707	0.0019436	0.00165972	0.0017859	0.0018166	1000	0.00278297
345	ENSGALP00000005819	GLUL	ENSGALP00000005819	345	345	54355	ENSGALP00000001774	Probable glutamate receptor (kainate-binding protein)	GLRK	383540	0	0	0	0	0	0	0	0	0	0	0	0	0							0						0	0	55190	61995	157560	108800			2.74946e-05	1.1955e-05	3.16114e-05	2.11588e-05	1000
1702	ENSGALP00000041374	CHST14	ENSGALP00000041374	1702	1702	35277	ENSGALP00000001795	Coenzyme Q9 homolog	COQ9	122330	0	0	0	0	0	0	0	0	0	0	0	0	0							0						0	0	0	37009	85321	0				7.13676e-06	1.7118e-05		1000
1110	ENSGALP00000036575;ENSGALP00000020395	SLC12A7	ENSGALP00000020395;ENSGALP00000036575	331;645;1110	1110	52290	ENSGALP00000001845	Propionyl CoA carboxylase, beta polypeptide	PCCB	98937	0	0	0	0	0	0	0	0	0	0	0	0	0							0						0	8959.3	18810	32938	0	38229		5.76497e-06	9.37078e-06	6.35171e-06		7.43455e-06	1000
1604	ENSGALP00000038322	VPS29	ENSGALP00000038322	1604	1604	50219	ENSGALP00000001848	Phosphatidylinositol glycan anchor biosynthesis, class U	PIGU	289180	0	0	0	0	0	0	0	0	0	0	0	0	0							0						0	0	0	95452	120710	73021				1.84068e-05	2.42182e-05	1.42007e-05	1000
1662	ENSGALP00000040387	PFKL	ENSGALP00000040387	1662	1662	47157	ENSGALP00000001850	Homocysteine-inducible, endoplasmic reticulum stress-inducible, ubiquitin-like domain member 1	HERPUD1	16253	0	0	0	0	0	0	0	0	0	0	0	0	0							0						0	16253	0	0	0	0		1.04582e-05					1000
1481	ENSGALP00000031702	VAMP7	ENSGALP00000031702	1481	1481	26754	ENSGALP00000001877	Syntaxin 8	STX8	453770	0	0	0	0	0	0	0	0	0	0	0	0	0							0						18441	9193	37954	75446	130390	182350	1.29751e-05	5.91535e-06	1.89079e-05	1.45489e-05	2.61603e-05	3.54624e-05	1000
284	ENSGALP00000004589	BRI3BP	ENSGALP00000004589	284	284	34605	ENSGALP00000001882	Solute carrier family 25 (mitochondrial carrier; citrate transporter), member 1	SLC25A1	1818400	0	0	0	0	0	0	0	0	0	0	0	0	0							0						150590	94257	128530	415570	621450	408000	0.000105955	6.06508e-05	6.40311e-05	8.01379e-05	0.000124682	7.93455e-05	1000
1149	ENSGALP00000021405	YKT6	ENSGALP00000021405	1149	1149	76977	ENSGALP00000001894	Amyloid beta A4 protein	O93296	133590	0	0	0	0	0	0	0	0	0	0	0	0	0							0						0	0	0	31294	31364	70927				6.03469e-06	6.29259e-06	1.37935e-05	1000
209;418	ENSGALP00000003331;ENSGALP00000006987	AP3B2;AP3B1	ENSGALP00000003331;ENSGALP00000006987	209;418	209;418	83458	ENSGALP00000001896	Amyloid beta (A4) precursor-like protein 2	APLP2	288820	0	0	0	0	0	0	0	0	0	0	0	0	0							0						0	0	6016.9	114840	53967	114000			2.9975e-06	2.21456e-05	1.08274e-05	2.21701e-05	1000
1582	ENSGALP00000037568	GYLTL1B	ENSGALP00000037568	1582	1582	238100	ENSGALP00000001909	Nuclear mitotic apparatus protein 1	NUMA1	71797	0	0	0	0	0	0	0	0	0	0	0	0	0							0						4424.6	989.26	0	8130.6	30679	27574	3.11316e-06	6.36551e-07		1.56789e-06	6.15515e-06	5.36243e-06	1000
683	ENSGALP00000011822	PSMD6	ENSGALP00000011822	683	683	100820	ENSGALP00000001957	Serine/arginine repetitive matrix 1	SRRM1	171820	0	0	0	0	0	0	0	0	0	0	0	0	0							0						0	13237	23281	46940	59078	29285		8.5175e-06	1.15981e-05	9.05184e-06	1.18529e-05	5.69518e-06	1000
202	ENSGALP00000039379;ENSGALP00000003166	AGRN	ENSGALP00000003166;ENSGALP00000039379	202	202	28102	ENSGALP00000001995	Synaptosomal-associated protein, 29kDa	SNAP29	50085	0	0	0	0	0	0	0	0	0	0	0	0	0							0						0	0	0	50085	0	0				9.65832e-06			1000
1471	ENSGALP00000030672	HIGD1A	ENSGALP00000030672	1471	1471	42413	ENSGALP00000002020	Basigin	BSG	9635800	0	0	0	0	0	0	0	0	0	0	0	0	0							0						386140	735870	568520	2548900	2868600	2527800	0.000271689	0.000473504	0.000283226	0.000491526	0.00057553	0.000491592	1000
499	ENSGALP00000008451	CDH11	ENSGALP00000008451	499	499	93517	ENSGALP00000002025	Suppression of tumorigenicity 14 (colon carcinoma)	ST14	175000	0	0	0	0	0	0	0	0	0	0	0	0	0							0						0	0	21472	64988	42809	45730			1.06969e-05	1.25322e-05	8.58881e-06	8.8933e-06	1000
1330	ENSGALP00000025250	GNG10	ENSGALP00000025250	1330	1330	23600	ENSGALP00000002039	Family with sequence similarity 18, member B1 (FAM18B1	FAM18B1	898810	0	0	0	0	0	0	0	0	0	0	0	0	0							0						0	0	0	191580	367490	339740				3.6944e-05	7.37298e-05	6.60707e-05	1000
559	ENSGALP00000009728;ENSGALP00000009265;ENSGALP00000027233	MST4;STK24;STK25	ENSGALP00000009265;ENSGALP00000009728	559	559	32936	ENSGALP00000002086	Hydroxysteroid (11-beta) dehydrogenase 1	HSD11B1	168200	0	0	0	0	0	0	0	0	0	0	0	0	0							0						0	0	15243	109120	43840	0			7.59377e-06	2.10425e-05	8.79566e-06		1000
1525	ENSGALP00000034622	MT-ND5	ENSGALP00000034622	1525	1525	23143	ENSGALP00000002182	Stromal cell-derived factor 2-like 1	SDF2L1	3066700	0	0	0	0	0	0	0	0	0	0	0	0	0							0						48205	0	64324	997920	995650	960630	3.39171e-05		3.2045e-05	0.000192437	0.000199758	0.000186818	1000
1812	ENSGALP00000043256	ALDOC	ENSGALP00000043256	1812	1812	85875	ENSGALP00000002197	Gelsolin	GSN	8880800	24628	0	0	0	0	0	1	20537	0	101100	9037.3	8282.7	0	0.000277359		0.00102432	0.000382353	0.000191028		4	0.000468766	0.000378544	0.00015454			635090	856080	757930	2247000	2029800	2191300	0.00044685	0.000550855	0.000377586	0.000433308	0.000407241	0.000426151	1000
944	ENSGALP00000016641;ENSGALP00000010319	OSBPL5;OSBPL8	ENSGALP00000016641	944	944	75427	ENSGALP00000002201	Stimulated by retinoic acid 6	STRA6	175780	0	0	0	0	0	0	0	0	0	0	0	0	0							0						0	0	36645	34928	46948	57262			1.82558e-05	6.73546e-06	9.41922e-06	1.1136e-05	1000
293	ENSGALP00000004879	ERLIN2	ENSGALP00000004879	293;310	293	28601	ENSGALP00000002205	ATP synthase, H+ transporting, mitochondrial Fo complex, subunit B1	ATP5F1	63585000	0	0	0	0	0	0	0	0	0	0	0	0	0							0						3645600	2758500	5363600	17925000	17304000	16589000	0.00256505	0.00177499	0.00267204	0.00345663	0.00347172	0.00322613	1000
1019	ENSGALP00000018456	NDUFA12	ENSGALP00000018456	1019	1019	8345.9	ENSGALP00000002218	Ribosomal protein L38	RPL38	6095200	0	0	0	0	0	0	0	0	0	0	0	0	0							0						459750	0	907160	1794600	1452300	1481500	0.000323481		0.000451929	0.000346068	0.000291376	0.000288113	1000
1761	ENSGALP00000042411	AHNAK	ENSGALP00000042411	1761	1761	33191	ENSGALP00000002228	Junctional adhesion molecule 3	JAM3	1647300	0	0	0	0	0	0	0	0	0	0	0	0	0							0						122560	229340	78929	375790	395390	445330	8.62334e-05	0.000147572	3.93209e-05	7.24668e-05	7.93274e-05	8.66052e-05	1000
711	ENSGALP00000012462	RPS25	ENSGALP00000012462	711	711	23897	ENSGALP00000002234	RAB14, member RAS oncogene family	RAB14	12156000	0	0	0	0	0	0	0	0	0	0	0	0	0							0						627560	464860	893590	3156100	3435500	3578500	0.000441552	0.00029912	0.000445169	0.000608618	0.000689267	0.000695926	1000
55	ENSGALP00000000509	HNRNPM	ENSGALP00000000509	55	55	96686	ENSGALP00000002248	Topoisomerase (DNA) III beta	TOP3B	15701	0	0	0	0	0	0	0	0	0	0	0	0	0							0						0	15701	0	0	0	0		1.0103e-05					1000
100	ENSGALP00000001445	NONE	ENSGALP00000001445	100	100	42495	ENSGALP00000002263	NDRG family member 3	NDRG3	6020800	0	0	0	0	0	0	0	0	0	18453	0	0	0			0.000186962				1	0.000186962			0.00152005	#VALUE!	473630	248040	639630	1463400	1884300	1293400	0.000333247	0.000159604	0.000318651	0.0002822	0.000378049	0.000251533	1000	0.00152005
1051	ENSGALP00000019027	AHNAK2	ENSGALP00000019027	1051	1051	269150	ENSGALP00000002297	Centriolin	CNTRL	53733	0	0	0	0	0	0	0	0	0	0	0	0	0							0						0	0	0	26950	26783	0				5.197e-06	5.3735e-06		1000
1142	ENSGALP00000021255	CCT5	ENSGALP00000021255	1142	1142	70447	ENSGALP00000002302	ATPase family, AAA domain containing 3A	ATAD3A	224880	0	0	0	0	0	0	0	0	0	0	0	0	0							0						0	0	0	66487	81035	77363				1.28213e-05	1.62581e-05	1.50451e-05	1000
99	ENSGALP00000001411	SNX27	ENSGALP00000001411	99	99	39272	ENSGALP00000002310	Vacuolar protein sorting 26 homolog B	VPS26B	24617	0	0	0	0	0	0	0	0	0	0	0	0	0							0						0	0	0	0	24617	0					4.93893e-06		1000
530	ENSGALP00000009045	ABCD3	ENSGALP00000009045	530	530	58888	ENSGALP00000002338	Splicing factor 3a, subunit 3, 60kDa	SF3A3	243280	0	0	0	0	0	0	0	0	0	0	0	0	0							0						0	0	0	105650	45470	92159				2.03734e-05	9.12269e-06	1.79225e-05	1000
1524	ENSGALP00000034621	MT-ND4	ENSGALP00000034621	1524	1524	32959	ENSGALP00000002349	Capping protein, alpha 1	CAPZA1	389520	0	0	0	0	0	0	0	0	0	0	0	0	0							0						19324	0	39683	87948	242570	0	1.35964e-05		1.97693e-05	1.69598e-05	4.8667e-05		1000
1108	ENSGALP00000020373;ENSGALP00000021737	MPST	ENSGALP00000020373;ENSGALP00000021737	1108	1108	58538	ENSGALP00000002352	RNA binding motif protein 39	RBM39	246550	0	0	0	0	0	0	0	0	0	0	0	0	0							0						23455	0	0	83967	41893	97235	1.6503e-05			1.61921e-05	8.40503e-06	1.89097e-05	1000
333	ENSGALP00000005649	LPCAT2	ENSGALP00000005649	333	333	65775	ENSGALP00000002380	5'-nucleotidase domain containing 2	NT5DC2	22224	0	0	0	0	0	0	0	0	0	0	0	0	0							0						0	0	0	0	22224	0					4.45882e-06		1000
1723	ENSGALP00000041749	GNA13	ENSGALP00000041749	1723	1723	22656	ENSGALP00000002407	Mitochondrial ribosomal protein L40	MRPL40	706690	0	0	0	0	0	0	0	0	0	0	0	0	0							0						0	0	0	0	371510	335180					7.45364e-05	6.51839e-05	1000
1641	ENSGALP00000039598	SLC25A39	ENSGALP00000039598	1641	1641	23085	ENSGALP00000002420	Proteasome (prosome, macropain) subunit, beta type, 3	PSMB3	56129	0	0	0	0	0	0	0	0	0	0	0	0	0							0						0	0	0	0	0	56129						1.09156e-05	1000
1251	ENSGALP00000023810	PTPRK	ENSGALP00000023810	1251	1251	72904	ENSGALP00000002436	Galactosidase, beta 1-like 2	GLB1L2	957660	0	0	0	0	0	0	0	0	0	0	0	0	0							0						28267	0	0	282930	355000	291460	1.98887e-05			5.45598e-05	7.1224e-05	5.66814e-05	1000
1605	ENSGALP00000038334	ALPL	ENSGALP00000038334	1605	1605	21201	ENSGALP00000002442	Chromosome 17 open reading frame 62	C17ORF62	1130600	0	0	0	0	0	0	0	0	0	0	0	0	0							0						19914	0	0	392940	228670	489060	1.40115e-05			7.5774e-05	4.58783e-05	9.51095e-05	1000
1820	ENSGALP00000043447	JTB	ENSGALP00000043447	1820	1820	35162	ENSGALP00000002466	2-oxoglutarate and iron-dependent oxygenase domain containing 3	OGFOD3	753330	0	0	0	0	0	0	0	0	0	0	0	0	0							0						0	56278	68017	184320	192440	252270		3.62127e-05	3.38847e-05	3.5544e-05	3.86094e-05	4.906e-05	1000
1599	ENSGALP00000038261	CD151	ENSGALP00000038261	1599	1599	14865	ENSGALP00000002493	Ribosomal protein L23	RPL23	5594200	0	0	0	0	0	0	0	0	0	0	0	0	0							0						686160	479870	1330100	846640	1488500	762800	0.000482783	0.000308778	0.00066263	0.000163265	0.000298639	0.000148345	1000
852	ENSGALP00000015093	RNPS1	ENSGALP00000015093	852	852	42343	ENSGALP00000002505	Glycosyltransferase 8 domain containing 1	GLT8D1	2862100	0	0	0	0	0	0	0	0	0	0	0	0	0							0						196790	130290	229920	846260	716710	742180	0.000138462	8.38366e-05	0.000114542	0.000163192	0.000143794	0.000144335	1000
243	ENSGALP00000003920	CHCHD2	ENSGALP00000003920	243	243	27616	ENSGALP00000002514	Derlin 2	DERL2	2984000	0	0	0	0	0	0	0	0	0	0	0	0	0							0						0	0	170790	935050	1111200	766970			8.50842e-05	0.000180314	0.000222941	0.000149156	1000
44	ENSGALP00000000316	MVP	ENSGALP00000000316	44	44	40225	ENSGALP00000002520	Septin 1	SEPT1_	140730	0	0	0	0	0	0	0	0	0	0	0	0	0							0						4736.9	0	0	43960	53920	38108	3.33289e-06			8.47718e-06	1.0818e-05	7.41102e-06	1000
700	ENSGALP00000012193;REV__ENSGALP00000012193	REV__ENSGALP00000012193;VAPB	ENSGALP00000012193	700	700	23547	ENSGALP00000002522	Complement component 1, q subcomponent binding protein	C1QBP	2320700	0	0	0	0	0	0	0	0	0	0	0	0	0							0						0	0	72538	661530	610190	976450			3.6137e-05	0.000127568	0.000122423	0.000189894	1000
817	ENSGALP00000014321	NDUFA5	ENSGALP00000014321	817	817	27210	ENSGALP00000002523	Signal peptidase complex subunit 1 homolog	SPCS1	9272900	0	0	0	0	0	0	0	0	0	0	0	0	0							0						0	0	371180	2864600	2552500	3484600			0.000184915	0.000552405	0.00051211	0.000677665	1000
1188	ENSGALP00000022309	TMX3	ENSGALP00000022309	1188	1188	36715	ENSGALP00000002580	Secretory carrier membrane protein 2	SCAMP2	5882800	0	0	0	0	0	0	0	0	0	0	0	0	0							0						478100	546520	447800	1341700	1171400	1897300	0.000336392	0.000351665	0.000223085	0.000258731	0.000235019	0.000368976	1000
815	ENSGALP00000014308	CCT4	ENSGALP00000014308	815	815	55876	ENSGALP00000002625	ATPase, H+ transporting, lysosomal 56/58kDa, V1 subunit B2	ATP6V1B2	914780	0	0	0	0	0	0	0	0	0	0	0	0	0							0						53270	12554	116820	290030	211550	230550	3.74809e-05	8.07802e-06	5.81974e-05	5.59289e-05	4.24435e-05	4.4836e-05	1000
939	ENSGALP00000016585	ALDH6A1	ENSGALP00000016585	939	939	41968	ENSGALP00000002670	Neuroplastin	NPTN	1312900	0	0	0	0	0	0	0	0	0	0	0	0	0							0						72162	284850	96900	301800	248930	308290	5.07733e-05	0.00018329	4.82737e-05	5.81987e-05	4.9943e-05	5.99544e-05	1000
318	ENSGALP00000005363	ADAM9	ENSGALP00000005363	318	318	59898	ENSGALP00000002695	ATP synthase, H+ transporting, mitochondrial F1 complex, alpha subunit 1, cardiac muscle	ATP5A1	192980000	0	0	22247	0	0	0	1	1088700	163460	646510	158220	416070	317950	0.0147033	0.00604525	0.0065503	0.00669402	0.00959602	0.0116145	6	0.00920055	0.00345038	0.00140861			18683000	13800000	24856000	42270000	43905000	46649000	0.0131454	0.00887977	0.0123828	0.00815128	0.0088087	0.00907203	1000
1354	ENSGALP00000025890	EMC2	ENSGALP00000025890	1354	1354	53093	ENSGALP00000002754	ADP-dependent glucokinase	ADPGK	6384800	0	0	0	0	0	0	0	0	0	0	0	0	0							0						336560	199440	543180	1920200	1819600	1565800	0.000236804	0.000128332	0.000270602	0.000370288	0.000365068	0.000304508	1000
201	ENSGALP00000003165	ARVCF	ENSGALP00000003165	201	201	21117	ENSGALP00000002786	Matrix-remodelling associated 7	MXRA7	1511100	0	0	0	0	0	0	0	0	0	0	0	0	0							0						129320	96201	129460	380440	384810	390880	9.09898e-05	6.19017e-05	6.44944e-05	7.33635e-05	7.72048e-05	7.60161e-05	1000
171	ENSGALP00000002789	CUX1	ENSGALP00000002789	171	171	146800	ENSGALP00000002789	Cut-like homeobox 1	CUX1	30158	0	0	0	0	0	0	0	0	0	0	0	0	0							0						0	0	0	16472	13686	0				3.17644e-06	2.74583e-06		1000
933	ENSGALP00000016536;ENSGALP00000027534	HSPA4L;HSPH1	ENSGALP00000016536	680;933	933	60482	ENSGALP00000002822	Glyoxylate reductase 1 homolog (Arabidopsis)	GLYR1	193720	0	0	0	0	0	0	0	0	0	0	0	0	0							0						11421	7543.8	17292	34729	70553	52179	8.03583e-06	4.85415e-06	8.61454e-06	6.69709e-06	1.41551e-05	1.01475e-05	1000
1389	ENSGALP00000026457	PDHA1	ENSGALP00000026457	1389	1389	95228	ENSGALP00000002828	Eukaryotic translation elongation factor 2	EEF2	928460	8766.1	0	0	0	0	0	1	0	0	0	0	0	0							0						51043	13687	137910	203240	258750	255070	3.59139e-05	8.80706e-06	6.87041e-05	3.91925e-05	5.19132e-05	4.96045e-05	1000
146	ENSGALP00000002310	VPS26B	ENSGALP00000002310	146	146	58881	ENSGALP00000002834	Sodium channel, non-voltage-gated 1, delta subunit	SCNN1D	11839	0	0	0	0	0	0	0	0	0	0	0	0	0							0						0	0	0	11839	0	0				2.28301e-06			1000
497	ENSGALP00000008346	ACSL3	ENSGALP00000008346	497	497	60215	ENSGALP00000002864	Katanin p60 subunit A-like 2	KATNAL2	1044300	11531	0	0	0	0	0	1	0	0	0	0	0	0							0						87707	65281	112730	252700	251870	262440	6.17108e-05	4.20058e-05	5.61599e-05	4.87303e-05	5.05329e-05	5.10378e-05	1000
291	ENSGALP00000004817	PRDX6	ENSGALP00000004817	291	291	76355	ENSGALP00000002866	Leucine-rich repeats and WD repeat domain containing 1	LRWD1	163390	0	0	0	0	0	0	0	0	0	0	0	0	0							0						0	0	9609.9	52585	82185	19008			4.78746e-06	1.01404e-05	1.64888e-05	3.69656e-06	1000
1658	ENSGALP00000040104	ARL8A	ENSGALP00000040104	773;1658	1658	39094	ENSGALP00000002874	UDP-Gal:betaGal beta 1,3-galactosyltransferase polypeptide 6	B3GALT6	130150	0	0	0	0	0	0	0	0	0	0	0	0	0							0						68896	0	0	0	0	61258	4.84753e-05					1.19131e-05	1000
945	ENSGALP00000016648	KRT78	ENSGALP00000016648	945;1692	945	205150	ENSGALP00000002888	Vitellogenin-2	VIT2	5613.2	0	0	0	0	0	0	0	0	0	0	0	0	5613.2						0.000205046	1	0.000205046			0.00166707	#VALUE!	0	0	0	0	0	0							1000	0.00166707
1772	ENSGALP00000042600	AIF1L	ENSGALP00000042600	1772	1772	41907	ENSGALP00000002903	Stromal cell derived factor 4	SDF4	352010	0	0	0	0	0	0	0	0	0	0	0	0	0							0						0	0	0	30515	92440	229050				5.88447e-06	1.85463e-05	4.45443e-05	1000
1455	ENSGALP00000029144	ETHE1	ENSGALP00000029144	1455	1455	57497	ENSGALP00000002911	Amylase, alpha 1A (salivary)	AMY1A	34961	0	0	0	0	0	0	0	0	0	0	0	0	0							0						0	0	34961	0	0	0			1.74169e-05				1000
905	ENSGALP00000015979	PPIG	ENSGALP00000015979	905	905	45949	ENSGALP00000002914	ST6 (alpha-N-acetyl-neuraminyl-2,3-beta-galactosyl-1,3)-N-acetylgalactosaminide alpha-2,6-sialyltransferase 2	ST6GALNAC2	415690	0	0	0	0	0	0	0	0	0	0	0	0	0							0						0	0	12651	127470	127830	147740			6.30248e-06	2.45811e-05	2.56466e-05	2.87316e-05	1000
1531	ENSGALP00000035339;NP_001026562.1	ATP5B	ENSGALP00000035339;NP_001026562.1	1531	1531	248070	ENSGALP00000002990	Myosin VIIB	MYO7B	253510	0	0	0	0	0	0	0	0	0	253510	0	0	0			0.00256851				1	0.00256851			0.0208827	#VALUE!	0	0	0	0	0	0							1000	0.0208827
1347	ENSGALP00000025642	TMEM67	ENSGALP00000025642	1347	1347	58948	ENSGALP00000002995	Hexosaminidase A (alpha polypeptide)	HEXA	43052	0	0	0	0	0	0	0	0	0	0	0	0	0							0						13649	0	0	0	29404	0	9.60346e-06				5.89935e-06		1000
1032	ENSGALP00000018715	SCARB2	ENSGALP00000018715	1032	1032	51968	ENSGALP00000002996	Solute carrier family 25 (mitochondrial carrier; phosphate carrier), member 24	SLC25A24	4029100	0	0	0	0	0	0	0	0	0	0	0	0	0							0						205240	161260	269360	1168900	1019000	1205300	0.000144407	0.000103765	0.00013419	0.000225409	0.000204443	0.0002344	1000
979	ENSGALP00000017577	AGR3	ENSGALP00000017577	979	979	35655	ENSGALP00000003012	Malate dehydrogenase 2, NAD (mitochondrial)	MDH2	19075000	0	0	0	0	0	0	0	0	0	0	0	0	0							0						2545700	900990	2279900	4665200	4372700	4311000	0.00179116	0.000579753	0.0011358	0.00089963	0.000877299	0.000838378	1000
910	ENSGALP00000016108	SCFD1	ENSGALP00000016108	910	910	60007	ENSGALP00000003035	Polypyrimidine tract binding protein 1	PTBP1	491610	0	0	0	0	0	0	0	0	0	0	0	0	0							0						40064	19925	37088	104440	119420	170670	2.81891e-05	1.2821e-05	1.84765e-05	2.01401e-05	2.39593e-05	3.31909e-05	1000
337	ENSGALP00000005673	ANK1	ENSGALP00000005673	337	337	140890	ENSGALP00000003058	Ubiquitin-conjugating enzyme E2O	UBE2O	91453	0	0	0	0	0	0	0	0	0	0	0	0	0							0						0	12261	0	16926	23371	38896		7.88949e-06		3.26398e-06	4.68894e-06	7.56427e-06	1000
881	ENSGALP00000015572	ATP6V1D	ENSGALP00000015572	881	881	41163	ENSGALP00000003065	Transmembrane protein 120A	TMEM120A	1032800	0	0	0	0	0	0	0	0	0	0	0	0	0							0						0	0	0	433260	297030	302500				8.35492e-05	5.95934e-05	5.88284e-05	1000
543	ENSGALP00000009483	TMED5	ENSGALP00000009483	543	543	89324	ENSGALP00000003089_family	Family {Valosin containing protein}	VCP	8328277	0	0	0	0	0	0	0	0	0	0	0	0	0							0						629620	314480	848520	2250700	2272077	2012900	0.000443002	0.000202356	0.000422716	0.000434022	0.000455849	0.000391457	1000
726	ENSGALP00000042061;ENSGALP00000012779;ENSGALP00000002449	PIP4K2A;PIP4K2B	ENSGALP00000002449;ENSGALP00000012779;ENSGALP00000042061	726	726	67664	ENSGALP00000003111	Syntaxin binding protein 3	STXBP3	38119	0	0	0	0	0	0	0	0	0	0	0	0	0							0						0	0	0	0	17630	20489					3.53712e-06	3.98458e-06	1000
1578	ENSGALP00000037478	ABCB6	ENSGALP00000037478	1578	1578	26902	ENSGALP00000003113	Breast carcinoma amplified sequence 2	BCAS2	165630	0	0	0	0	0	0	0	0	0	0	0	0	0							0						0	12668	0	84707	22217	46037		8.15138e-06		1.63348e-05	4.45742e-06	8.95301e-06	1000
935	ENSGALP00000016543	CTAGE5	ENSGALP00000016543	935	935	57497	ENSGALP00000003130	Smu-1 suppressor of mec-8 and unc-52 homolog	SMU1	266970	0	0	0	0	0	0	0	0	0	0	0	0	0							0						25467	0	0	106690	104380	30432	1.79186e-05			2.05739e-05	2.09418e-05	5.91824e-06	1000
1532	ENSGALP00000035366	IDH2	ENSGALP00000035366	816;1532	1532	47652	ENSGALP00000003139	Glutamate dehydrogenase 1, mitochondrial	GLUD1	1819800	0	0	0	0	0	0	0	0	0	0	0	0	0							0						180910	65914	116910	458640	493790	503670	0.000127289	4.24131e-05	5.82423e-05	8.84434e-05	9.90695e-05	9.79508e-05	1000
1125	ENSGALP00000020777	STAB2	ENSGALP00000020777	1125	1125	29788	ENSGALP00000003143	Catechol-O-methyltransferase	COMT	30996000	0	0	0	0	0	0	0	0	0	0	189990	0	0				0.00803815			1	0.00803815			0.0653523	#VALUE!	3242200	1660700	4658100	6905700	8035600	6303600	0.00228122	0.0010686	0.00232057	0.00133168	0.00161219	0.00122589	1000	0.0653523
32	ENSGALP00000000076	ARMC1	ENSGALP00000000076	32	32	68936	ENSGALP00000003149	Transmembrane protein 259	TMEM259	192180	0	0	0	0	0	0	0	0	0	0	0	0	0							0						0	11452	13263	64702	34239	68526		7.36893e-06	6.60737e-06	1.2477e-05	6.8694e-06	1.33265e-05	1000
1373	ENSGALP00000026283	GSTA4	ENSGALP00000026283	1373	1373	74401	ENSGALP00000003152	Adenosylhomocysteinase	AHCY	23108	0	0	0	0	0	0	0	0	0	0	0	0	0							0						0	0	0	0	0	23108						4.49391e-06	1000
1825	REV__ENSGALP00000002349	REV__ENSGALP00000002349	REV__ENSGALP00000002349	1825	1825	14917	ENSGALP00000003157	NADH dehydrogenase (ubiquinone) 1 beta subcomplex, 6, 17kDa	NDUFB6	27877000	0	0	0	0	0	0	0	0	0	0	0	0	0							0						2321000	1428500	2428500	6535700	7963500	7199800	0.00163306	0.000919185	0.00120983	0.00126033	0.00159772	0.00140018	1000
687	ENSGALP00000011976	MPZL2	ENSGALP00000011976	687	687	109710	ENSGALP00000003165	Armadillo repeat gene deleted in velocardiofacial syndrome	ARVCF	1681600	0	0	0	0	0	0	0	0	0	0	0	0	0							0						93624	54735	106630	562940	522320	341360	6.5874e-05	3.52199e-05	5.3121e-05	0.000108557	0.000104794	6.63857e-05	1000
826	ENSGALP00000014596	GNB4	ENSGALP00000014596	826;1640	826	76968	ENSGALP00000003187	P450 (cytochrome) oxidoreductase	POR	4711900	0	0	0	0	0	0	0	0	0	0	0	0	0							0						244640	155320	422210	1269300	1312700	1307700	0.000172129	9.99425e-05	0.000210337	0.00024477	0.000263368	0.000254314	1000
378	ENSGALP00000006311	EMC1	ENSGALP00000006311	378	378	39376	ENSGALP00000003207	Stomatin (EPB72)-like 2	STOML2	2108700	0	0	0	0	0	0	0	0	0	0	0	0	0							0						196550	221400	249490	493730	440260	507230	0.000138293	0.000142462	0.000124291	9.52101e-05	8.83297e-05	9.86431e-05	1000
632	ENSGALP00000010965	RPRD1B	ENSGALP00000010965	632	632	52301	ENSGALP00000003213	ALG1, chitobiosyldiphosphodolichol beta-mannosyltransferase	ALG1	227340	0	0	0	0	0	0	0	0	0	0	0	0	0							0						26526	0	16319	44059	81720	58720	1.86637e-05		8.12981e-06	8.49627e-06	1.63956e-05	1.14195e-05	1000
1613	ENSGALP00000038625	LAMC1	ENSGALP00000038625	1613	1613	20817	ENSGALP00000003252	Translocase of inner mitochondrial membrane 23	TIMM23	877210	0	0	0	0	0	0	0	0	0	0	0	0	0							0						134040	0	0	146450	119920	476810	9.43108e-05			2.82412e-05	2.40597e-05	9.27272e-05	1000
1651	ENSGALP00000039931	PSMD11	ENSGALP00000039931	1651	1651	25155	ENSGALP00000003263	Charged multivesicular body protein 4B	CHMP4B	189210	0	0	0	0	0	0	0	0	0	0	0	0	0							0						0	0	0	101040	0	88175				1.94844e-05		1.71478e-05	1000
830	ENSGALP00000014656	TMEM87A	ENSGALP00000014656	830	830	49993	ENSGALP00000003281	Chloride channel CLIC-like 1	CLCC1	742780	0	0	0	0	0	0	0	0	0	0	0	0	0							0						0	0	0	223700	294150	224930				4.3138e-05	5.90156e-05	4.37431e-05	1000
259	ENSGALP00000004248	DNAJC9	ENSGALP00000004248	259	259	118760	ENSGALP00000003331_family	Family {Adaptor-related protein complex 3, beta 2 subunit}	AP3B2;AP3B1	246906	0	0	0	0	0	0	0	0	0	0	0	0	0							0						7577.2	0	7957	43003	74090	114278	5.33133e-06		3.96402e-06	8.29263e-06	1.48647e-05	2.22241e-05	1000
596	ENSGALP00000010414	RBMX	ENSGALP00000010414	596	596	105720	ENSGALP00000003342_family	Family {Adaptor-related protein complex 2, beta 1 subunit}	AP2B1;AP1B1	308669	0	0	0	0	0	0	0	0	0	0	0	0	0							0						0	19823	0	51428	145106	92315.5		1.27553e-05		9.9173e-06	2.91127e-05	1.7953e-05	1000
449	ENSGALP00000007619	PTGES2	ENSGALP00000007619	449	449	109880	ENSGALP00000003357	Thyroid hormone receptor associated protein 3	THRAP3	1023400	0	0	0	0	0	0	0	0	0	0	0	0	0							0						132980	96426	116590	148700	183920	344790	9.35649e-05	6.20465e-05	5.80829e-05	2.86751e-05	3.69e-05	6.70527e-05	1000
1520	ENSGALP00000034615	MT-CO2	ENSGALP00000034615	1520	1520	9539.8	ENSGALP00000003373	Ribosomal protein S17	RPS17	27443000	0	0	0	0	0	0	0	0	0	0	0	0	0							0						1097800	243690	3446100	7416000	8103800	7135700	0.000772414	0.000156805	0.00171678	0.00143009	0.00162587	0.00138771	1000
411	ENSGALP00000006898	ABCA10	ENSGALP00000006898	411	411	74513	ENSGALP00000003376	Acyl-CoA oxidase 1, palmitoyl	ACOX1	460630	0	0	0	0	0	0	0	0	0	0	0	0	0							0						29712	8785.1	36899	125480	125960	133790	2.09054e-05	5.65288e-06	1.83824e-05	2.41974e-05	2.52715e-05	2.60187e-05	1000
868	ENSGALP00000015369	MARC2L_	ENSGALP00000015369	868	868	80148	ENSGALP00000003418	SCP2 sterol-binding domain containing 1	SCP2D1	3593300	0	0	0	0	0	0	0	0	0	0	0	0	0							0						366840	322030	506880	742330	897330	757900	0.000258109	0.000207214	0.000252518	0.00014315	0.000180032	0.000147392	1000
995	ENSGALP00000017954	HNRNPA2B1	ENSGALP00000017954	995	995	30352	ENSGALP00000003431	Nucleophosmin (nucleolar phosphoprotein B23, numatrin)	NPM1	1436900	0	0	0	0	0	0	0	0	0	0	0	0	0							0						0	0	0	390030	510970	535890				7.52128e-05	0.000102516	0.000104217	1000
884	ENSGALP00000015623;ENSGALP00000041331	EPRS	ENSGALP00000015623;ENSGALP00000041331	884	884	180450	ENSGALP00000003441	Periplakin	PPL	15860	0	0	0	0	0	0	0	0	0	0	0	0	0							0						0	0	0	5662.9	3262.4	6934.9				1.09203e-06	6.54538e-07	1.34866e-06	1000
1834	REV__ENSGALP00000014760	REV__ENSGALP00000014760	REV__ENSGALP00000014760	1834	1834	16244	ENSGALP00000003455	Peptidylprolyl isomerase B (cyclophilin B)	PPIB	36678000	0	0	0	0	0	0	0	0	0	0	0	0	0							0						2474000	956180	3107600	9444400	9815700	10880000	0.00174071	0.000615265	0.00154815	0.00182124	0.00196933	0.00211588	1000
1422	ENSGALP00000027412	FNDC3A	ENSGALP00000027412	1422	1422	86665	ENSGALP00000003574	Major facilitator superfamily domain containing 6	MFSD6	154330	0	0	0	0	0	0	0	0	0	0	0	0	0							0						0	0	0	41770	65530	47034				8.05486e-06	1.31473e-05	9.1469e-06	1000
673	ENSGALP00000011629	ATP6V1G1	ENSGALP00000011629	673	673	20276	ENSGALP00000003580	Trafficking protein particle complex 3	TRAPPC3	1201000	0	0	0	0	0	0	0	0	0	0	0	0	0							0						0	42644	71067	350380	368750	368200		2.74398e-05	3.54042e-05	6.75668e-05	7.39826e-05	7.16054e-05	1000
1374	ENSGALP00000030998;ENSGALP00000026286	GSTA1	ENSGALP00000026286;ENSGALP00000030998	1374	1374	101230	ENSGALP00000003592	Ligase III, DNA, ATP-dependent	LIG3	228580	0	0	0	0	0	0	0	0	0	0	186420	0	0				0.00788711			1	0.00788711			0.0641243	#VALUE!	0	0	0	21312	20855	0				4.10977e-06	4.18416e-06		1000	0.246548
136	ENSGALP00000002201	STRA6	ENSGALP00000002201	136	136	67623	ENSGALP00000003607	Collagen, type VIII, alpha 2	COL8A2	229160	0	0	0	0	0	0	0	0	0	0	0	0	0							0						17833	0	32155	57543	63861	57772	1.25473e-05		1.6019e-05	1.10965e-05	1.28125e-05	1.12352e-05	1000
77	ENSGALP00000039747;ENSGALP00000039740;ENSGALP00000000914;ENSGALP00000000915;ENSGALP00000034591	NFASC	ENSGALP00000000914;ENSGALP00000000915;ENSGALP00000034591;ENSGALP00000039740;ENSGALP00000039747	77	77	22737	ENSGALP00000003621	COMM domain containing 10 (COMMD10	COMMD10	37868	0	0	0	0	0	0	0	0	0	0	0	0	0							0						0	0	37868	0	0	0			1.88651e-05				1000
1184	ENSGALP00000022149	MTMR7	ENSGALP00000022149	1184	1184	109730	ENSGALP00000003642	Aminopeptidase Q	AQPEP	41979	0	0	0	0	0	0	0	0	0	0	0	0	0							0						0	0	0	10559	15946	15474				2.03618e-06	3.19926e-06	3.00929e-06	1000
255	ENSGALP00000004186	ANXA11	ENSGALP00000004186	255	255	47334	ENSGALP00000003646	Glutamic-oxaloacetic transaminase 2, mitochondrial	GOT2	6978600	0	0	0	0	0	0	0	0	0	0	0	0	0							0						584190	568490	743860	1576300	1798500	1707400	0.000411037	0.000365802	0.000370577	0.000303971	0.000360835	0.000332045	1000
1705	ENSGALP00000041404	DAG1	ENSGALP00000041404	1705	1705	21595	ENSGALP00000003683	Adaptor-related protein complex 3, sigma 1 subunit	AP3S1	271510	0	0	0	0	0	0	0	0	0	0	0	0	0							0						0	75382	75720	0	0	120410		4.85054e-05	3.77222e-05			2.34166e-05	1000
402	ENSGALP00000006699	SERINC3	ENSGALP00000006699	402	402	49152	ENSGALP00000003691	Chromosome 3 open reading frame 58	C3ORF58	100480	0	0	0	0	0	0	0	0	0	0	0	0	0							0						0	0	0	0	100480	0					2.01594e-05		1000
1200	ENSGALP00000022525	PRPF19	ENSGALP00000022525	1200	1200	18766	ENSGALP00000003715	Mesencephalic astrocyte-derived neurotrophic factor	MANF	2655300	0	0	0	0	0	0	0	0	0	0	0	0	0							0						222700	216550	125110	429680	1001400	659860	0.000156692	0.000139342	6.23274e-05	8.28588e-05	0.000200912	0.000128326	1000
516	ENSGALP00000008830	RP11-599B13.6	ENSGALP00000008830	516;1517	516	73161	ENSGALP00000003717	Heat shock 70kDa protein 9 (mortalin)	HSPA9	3195100	0	0	0	0	0	0	0	0	0	0	0	0	0							0						247020	194370	225480	749730	705950	1072500	0.000173804	0.00012507	0.00011233	0.000144577	0.000141635	0.000208574	1000
325	ENSGALP00000043335;ENSGALP00000005509	ALDH3B1	ENSGALP00000005509;ENSGALP00000043335	325;447	325	47332	ENSGALP00000003737	Enolase 1, (alpha)	ENO1	9644600	264800	0	0	0	0	0	1	0	0	0	0	8279.3	0					0.000190949		1	0.000190949					559740	255640	720110	2720800	2886600	2228600	0.000393834	0.000164495	0.000358745	0.000524675	0.000579141	0.000433405	1000
346	ENSGALP00000005822;ENSGALP00000043331	TOP1	ENSGALP00000005822;ENSGALP00000043331	346	346	15502	ENSGALP00000003740	28S ribosomal protein S17, mitochondrial; HCG1984214, isoform CRA_a	MRPS17	942870	0	0	0	0	0	0	0	0	0	0	0	0	0							0						0	76552	125190	138590	407020	195510		4.92583e-05	6.23672e-05	2.67255e-05	8.16608e-05	3.80216e-05	1000
50	ENSGALP00000000419	INA	ENSGALP00000000419	50;51	50	33186	ENSGALP00000003749	Glioblastoma amplified sequence	GBAS	10960000	0	0	0	0	0	0	0	0	0	33019	13049	17711	0			0.000334542	0.000552081	0.000408477		3	0.0004317	0.000110613	4.51577e-05	0.00350983	0.00064566	1144100	817870	1156500	2702700	2312300	2762500	0.000804991	0.000526268	0.000576146	0.000521185	0.000463919	0.000537235	1000	0.00350983
592	ENSGALP00000010393	DUSP15	ENSGALP00000010393	592	592	194460	ENSGALP00000003752	Integrin, beta 4	ITGB4	226180	0	0	0	0	0	0	0	0	0	0	0	0	0							0						5578.2	7477.2	6854.1	58694	81011	66565	3.92483e-06	4.81129e-06	3.41458e-06	1.13185e-05	1.62533e-05	1.29452e-05	1000
1305	ENSGALP00000024855	MPZL1	ENSGALP00000024855	1305	1305	25050	ENSGALP00000003802	Chromosome 6 open reading frame 58	C10ORF58	684160	0	0	0	0	0	0	0	0	0	0	0	0	0							0						0	32608	0	206680	216400	228480		2.0982e-05		3.98559e-05	4.34165e-05	4.44335e-05	1000
1793	ENSGALP00000042891	CHTOP	ENSGALP00000042891	1793	1793	56718	ENSGALP00000003847	Catenin (cadherin-associated protein), alpha 1, 102kDa	CTNNA1	10316000	0	0	0	0	0	0	0	0	0	0	0	0	0							0						780340	293460	651240	2554700	3794400	2241800	0.000549049	0.00018883	0.000324435	0.000492644	0.000761274	0.000435972	1000
1458	ENSGALP00000029365	TP53I11	ENSGALP00000029365	1458	1458	57715	ENSGALP00000003850	Chaperonin containing TCP1, subunit 6A (zeta 1)	CCT6A	824120	0	0	0	0	0	0	0	0	0	0	0	0	0							0						0	0	51341	183770	309630	279380			2.55771e-05	3.54379e-05	6.21213e-05	5.43322e-05	1000
1247	ENSGALP00000023635	LMNB1	ENSGALP00000023635	63;1247	1247	20631	ENSGALP00000003877	SEC11 homolog A	SEC11A	5095900	0	0	0	0	0	0	0	0	0	0	0	0	0							0						137960	95310	253670	1497100	1622700	1489300	9.70689e-05	6.13284e-05	0.000126373	0.000288699	0.000325564	0.00028963	1000
1590	ENSGALP00000037867;ENSGALP00000037866	OAT	ENSGALP00000037866;ENSGALP00000037867	1590	1590	59828	ENSGALP00000003890	Cytochrome P450, family 27, subfamily A, polypeptide 1	CYP27A1	45958	0	0	0	0	0	0	0	0	0	0	0	0	0							0						0	0	0	20019	25939	0				3.86043e-06	5.20416e-06		1000
704	ENSGALP00000012293	RPL35A	ENSGALP00000012293	704	704	100710	ENSGALP00000003898	Matrin 3	MATR3	630330	0	0	0	0	0	0	0	0	0	0	0	0	0							0						18888	16182	57160	181640	293000	63458	1.32896e-05	1.04125e-05	2.8476e-05	3.50272e-05	5.87848e-05	1.23409e-05	1000
562	ENSGALP00000009791	METTL7A	ENSGALP00000009791	562	562	15248	ENSGALP00000003920	Coiled-coil-helix-coiled-coil-helix domain containing 2	CHCHD2	3879500	0	0	0	0	0	0	0	0	0	0	0	0	0							0						0	217240	126160	1166100	908200	1461800		0.000139786	6.28505e-05	0.000224869	0.000182213	0.000284282	1000
1025	ENSGALP00000018565	TMEM66	ENSGALP00000018565	1025	1025	69097	ENSGALP00000003923	Ras homolog family member T2	RHOT2	150370	0	0	0	0	0	0	0	0	0	0	0	0	0							0						0	0	0	88226	16643	45503				1.70134e-05	3.3391e-06	8.84916e-06	1000
1561	ENSGALP00000036655	STX7	ENSGALP00000036655	1561	1561	19765	ENSGALP00000003935	Vitamin K epoxide reductase complex, subunit 1-like 1	VKORC1L1	2638700	0	0	0	0	0	0	0	0	0	0	0	0	0							0						236460	200380	280030	400800	866850	654160	0.000166374	0.000128937	0.000139505	7.72897e-05	0.000173917	0.000127217	1000
772	ENSGALP00000013516	NAPB	ENSGALP00000013516	772	772	69572	ENSGALP00000003954	Splicing factor proline/glutamine-rich	SFPQ	468390	0	0	0	0	0	0	0	0	0	0	0	0	0							0						62675	29249	34910	111960	112250	117350	4.40982e-05	1.88206e-05	1.73915e-05	2.15902e-05	2.25208e-05	2.28215e-05	1000
405	ENSGALP00000006778	EIF3B	ENSGALP00000006778	405	405	62293	ENSGALP00000004005	Chondroitin sulfate N-acetylgalactosaminyltransferase 2	CSGALNACT2	513830	0	0	0	0	0	0	0	0	0	0	0	0	0							0						42351	16892	0	180140	126060	148390	2.97982e-05	1.08694e-05		3.47379e-05	2.52915e-05	2.8858e-05	1000
1138	ENSGALP00000021117	ANKH	ENSGALP00000021117	1138	1138	180210	ENSGALP00000004011	Collagen, type V, alpha 1	COL5A1	31339	0	0	0	0	0	0	0	0	0	0	0	0	0							0						0	2376.2	0	10097	10020	8846.4		1.52899e-06		1.94709e-06	2.01032e-06	1.7204e-06	1000
795	ENSGALP00000013913	CRELD2	ENSGALP00000013913	795	795	271910	ENSGALP00000004013	Talin 1	TLN1	105160	0	0	0	0	0	0	0	0	0	0	0	0	0							0						1540.9	3058.4	11942	20931	46581	21103	1.08418e-06	1.96796e-06	5.94927e-06	4.0363e-06	9.34559e-06	4.10399e-06	1000
1671	ENSGALP00000040682	ANPEP	ENSGALP00000040682	1671	1671	24427	ENSGALP00000004046	RAN, member RAS oncogene family	RAN	803130	0	0	0	0	0	0	0	0	0	0	0	0	0							0						0	0	76096	292880	110130	324020			3.79095e-05	5.64785e-05	2.20955e-05	6.30135e-05	1000
1010	ENSGALP00000018293	CDS1	ENSGALP00000018293	1010	1010	156260	ENSGALP00000004048	Kinectin 1 (kinesin receptor)	KTN1	282150	0	0	0	0	0	0	0	0	0	0	0	0	0							0						6692.6	3092.2	0	95201	79858	97306	4.70892e-06	1.98971e-06		1.83584e-05	1.6022e-05	1.89235e-05	1000
1427	ENSGALP00000027541	HMGB1	ENSGALP00000027541	1427	1427	24708	ENSGALP00000004159	Ribosomal protein L10a	RPL10A	10883000	0	0	0	0	0	0	0	0	0	0	0	0	0							0						775600	560720	1443100	2511600	3023300	2568900	0.000545713	0.000360802	0.000718924	0.000484333	0.000606567	0.000499585	1000
1670	ENSGALP00000043258;ENSGALP00000041766;ENSGALP00000041269;ENSGALP00000040820;ENSGALP00000040715;ENSGALP00000040653;ENSGALP00000042371	H2A;H2A-VII	ENSGALP00000040653;ENSGALP00000040715;ENSGALP00000040820;ENSGALP00000041269;ENSGALP00000041766;ENSGALP00000043258	1447;1670	1670	70938	ENSGALP00000004164	Plastin 1	PLS1	20068	0	0	0	0	0	0	0	0	0	11472	0	0	0			0.000116232				1	0.000116232			0.000944996	#VALUE!	8595.7	0	0	0	0	0	6.04795e-06						1000	0.00249133
1535	ENSGALP00000035595	RPS11	ENSGALP00000035595	1535	1535	114360	ENSGALP00000004173	Integrin, alpha V	ITGAV	2320400	0	0	0	0	0	0	0	0	0	0	0	0	0							0						186710	58976	235280	573020	744080	522350	0.000131369	3.79488e-05	0.000117212	0.0001105	0.000149285	0.000101584	1000
1488	ENSGALP00000032822	NDUFB8	ENSGALP00000032822	1488	1488	52753	ENSGALP00000004186	Annexin A11	ANXA11	10922000	0	0	0	0	0	0	0	0	0	0	0	0	0							0						779440	471650	884790	3213300	3080800	2492000	0.000548415	0.000303489	0.000440785	0.000619648	0.000618104	0.00048463	1000
1021	ENSGALP00000018497	NEGR1	ENSGALP00000018497	1021	1021	54984	ENSGALP00000004189	Prenylcysteine oxidase 1 like	PCYOX1L	265390	0	0	0	0	0	0	0	0	0	0	0	0	0							0						0	0	0	89917	91163	84311				1.73395e-05	1.82901e-05	1.63963e-05	1000
977	ENSGALP00000017563	GOLGA5	ENSGALP00000017563	977	977	37356	ENSGALP00000004214	Hydroxysteroid (17-beta) dehydrogenase 7	HSD17B7	386250	0	0	0	0	0	0	0	0	0	0	0	0	0							0						0	0	42327	63762	148520	131630			2.10865e-05	1.22958e-05	2.97977e-05	2.55986e-05	1000
1024	ENSGALP00000018548	BCS1L	ENSGALP00000018548	1024	1024	79745	ENSGALP00000004217	Bromodomain containing 3	BRD3	33765	0	0	0	0	0	0	0	0	0	0	0	0	0							0						0	0	0	0	0	33765						6.56642e-06	1000
607	ENSGALP00000010503	C5ORF15	ENSGALP00000010503	607	607	29844	ENSGALP00000004248	DnaJ (Hsp40) homolog, subfamily C, member 9 (DNAJC9	DNAJC9	149430	0	0	0	0	0	0	0	0	0	0	0	0	0							0						0	36159	0	113270	0	0		2.32669e-05		2.18428e-05			1000
957	ENSGALP00000017119	OSTC	ENSGALP00000017119	957	957	29966	ENSGALP00000004251	Transcription factor A, mitochondrial	TFAM	9297100	0	0	0	0	0	0	0	0	0	0	0	0	0							0						496930	365170	586690	2499500	2675000	2673900	0.000349641	0.000234973	0.000292278	0.000482	0.000536688	0.000520004	1000
654	ENSGALP00000041473;ENSGALP00000011475	UQCRQ	ENSGALP00000011475;ENSGALP00000041473	654	654	11864	ENSGALP00000004256	CDGSH iron sulfur domain 1	CISD1	17016000	0	0	0	0	0	0	0	0	0	0	0	0	0							0						1411700	903950	2292500	3725800	4412900	4269200	0.000993274	0.000581657	0.00114208	0.000718478	0.000885364	0.000830249	1000
1519	ENSGALP00000034614	MT-CO1	ENSGALP00000034614	1519	1519	21296	ENSGALP00000004275	Transmembrane and coiled-coil domains 1	TMCO1	3230000	0	0	0	0	0	0	0	0	0	0	0	0	0							0						220330	0	258290	830060	910850	1010500	0.000155025		0.000128675	0.000160068	0.000182745	0.000196516	1000
36	ENSGALP00000000160	PLP1	ENSGALP00000000160	36	36	119110	ENSGALP00000004317	Golgi glycoprotein 1	GLG1	8645500	0	0	0	0	0	0	0	0	0	0	0	0	0							0						871090	754170	1277400	2079400	2329000	1334500	0.0006129	0.00048528	0.000636376	0.000400988	0.000467269	0.000259526	1000
601	ENSGALP00000010443;ENSGALP00000001929	PLXNA3;PLXNA4	ENSGALP00000001929;ENSGALP00000010443	601	601	129470	ENSGALP00000004335	NCK-associated protein 1	NCKAP1	25996	0	0	0	0	0	0	0	0	0	0	0	0	0							0						0	0	0	13844	0	12152				2.66966e-06		2.36325e-06	1000
76	ENSGALP00000000893	NDUFA7	ENSGALP00000000893	76	76	31858	ENSGALP00000004355	ATPase, Na+/K+ transporting, beta 3 polypeptide	ATP1B3	19005000	0	0	0	0	0	0	0	0	0	0	0	0	0							0						535340	1110700	1694400	4370400	5430300	5863900	0.000376666	0.000714693	0.000844117	0.000842781	0.00108949	0.00114038	1000
895	ENSGALP00000015853	C1GALT1	ENSGALP00000015853	895	895	29504	ENSGALP00000004371	Tetraspanin 3	TSPAN3	243350	0	0	0	0	0	0	0	0	0	0	0	0	0							0						107300	136040	0	0	0	0	7.54965e-05	8.75366e-05					1000
1279	ENSGALP00000024371	CDH2	ENSGALP00000024371	484;1279	1279	41654	ENSGALP00000004375	Acetyl-CoA acyltransferase 2	ACAA2	1295700	0	0	0	0	0	0	0	0	0	0	0	0	0							0						180040	55967	184610	384650	281730	208690	0.000126676	3.60126e-05	9.19691e-05	7.41753e-05	5.65237e-05	4.05848e-05	1000
269	ENSGALP00000004425	MTA1	ENSGALP00000004425	269	269	81301	ENSGALP00000004425	Metastasis associated 1	MTA1	25193	0	0	0	0	0	0	0	0	0	0	0	0	0							0						0	0	7495.2	9923.7	0	7774.4			3.73396e-06	1.91367e-06		1.51192e-06	1000
1592	ENSGALP00000037924	HNRNPA3	ENSGALP00000037924	1592	1592	18910	ENSGALP00000004437	Ribosomal protein S10	RPS10	3491000	0	0	0	0	0	0	0	0	0	0	0	0	0							0						151980	107490	0	1176300	1171300	884000	0.000106933	6.91657e-05		0.000226836	0.000234999	0.000171915	1000
542	ENSGALP00000009481	RAB7A	ENSGALP00000009481	542	542	41678	ENSGALP00000004444	Vesicle amine transport 1	VAT1	11560000	0	0	0	0	0	0	0	0	0	0	0	0	0							0						713430	356230	704650	3071200	3054200	3660000	0.000501971	0.00022922	0.000351043	0.000592246	0.000612767	0.000711775	1000
929	ENSGALP00000016513	PNN	ENSGALP00000016513	929	929	41646	ENSGALP00000004467	Peroxisomal biogenesis factor 14	PEX14	298550	0	0	0	0	0	0	0	0	0	0	0	0	0							0						51779	49799	58766	138200	0	0	3.64318e-05	3.20438e-05	2.92761e-05	2.66503e-05			1000
611	ENSGALP00000010583	DNAJB11	ENSGALP00000010583	611	611	35711	ENSGALP00000004476	Reticulocalbin 2, EF-hand calcium binding domain	RCN2	2075400	0	0	0	0	0	0	0	0	0	0	0	0	0							0						110700	89804	133580	634790	469950	636580	7.78887e-05	5.77855e-05	6.6547e-05	0.000122412	9.42865e-05	0.000123798	1000
448	ENSGALP00000007593	PSAP	ENSGALP00000007593	448	448	100050	ENSGALP00000004477	Catenin (cadherin-associated protein), alpha 3	CTNNA3	76601	0	0	0	0	0	0	0	0	0	0	0	0	0							0						0	0	0	0	62793	13809					1.25982e-05	2.68549e-06	1000
511	ENSGALP00000008764	NDUFB10	ENSGALP00000008764	511	511	32546	ENSGALP00000004508	Endoplasmic reticulum-golgi intermediate compartment (ERGIC) 1	ERGIC1	13812000	0	0	0	0	0	0	0	0	0	0	0	0	0							0						644100	509110	581050	4142800	2878600	5056200	0.00045319	0.000327593	0.000289468	0.000798891	0.000577536	0.0009833	1000
187	ENSGALP00000003012	MDH2	ENSGALP00000003012	187	187	17258	ENSGALP00000004515	Ribosomal protein L26	RPL26	13827000	0	0	0	0	0	0	0	0	0	0	0	0	0							0						285520	841870	1305900	4130200	3557300	3706000	0.000200892	0.000541711	0.000650574	0.000796462	0.000713704	0.000720721	1000
1642	ENSGALP00000039613	LMF2	ENSGALP00000039613	1642	1642	55975	ENSGALP00000004517	LEM domain containing 2	LEMD2	3752600	0	0	0	0	0	0	0	0	0	0	0	0	0							0						268240	171990	311580	1021800	842710	1136300	0.000188734	0.000110669	0.000155223	0.000197042	0.000169074	0.000220981	1000
533	ENSGALP00000009212	EMC8	ENSGALP00000009212	533	533	15069	ENSGALP00000004534	Ubiquinol-cytochrome c reductase complex assembly factor 2	UQCC2	946050	0	0	0	0	0	0	0	0	0	0	0	0	0							0						167130	0	111030	150550	517340	0	0.000117593		5.5313e-05	2.90318e-05	0.000103794		1000
190	ENSGALP00000003065	TMEM120A	ENSGALP00000003065	190	190	26103	ENSGALP00000004536	BCL2/adenovirus E1B 19kDa interacting protein 1	BNIP1	1093700	0	0	0	0	0	0	0	0	0	0	0	0	0							0						63137	61464	117500	308550	233410	309640	4.44233e-05	3.95497e-05	5.85362e-05	5.95003e-05	4.68292e-05	6.0217e-05	1000
626	ENSGALP00000010929;ENSGALP00000040025	MCAM	ENSGALP00000010929;ENSGALP00000040025	626	626	47873	ENSGALP00000004548	Acyl-CoA dehydrogenase, long chain	ACADL	564550	0	0	0	0	0	0	0	0	0	0	0	0	0							0						35398	0	126230	196430	103200	103290	2.49061e-05		6.28853e-05	3.78793e-05	2.07051e-05	2.00872e-05	1000
946	ENSGALP00000016742	SLC33A1	ENSGALP00000016742	946	946	44559	ENSGALP00000004576	TAR DNA binding protein	TARDBP	68090	0	0	0	0	0	0	0	0	0	0	0	0	0							0						0	0	38118	29972	0	0			1.89896e-05	5.77976e-06			1000
656	ENSGALP00000011491	PDHB	ENSGALP00000011491	656	656	20277	ENSGALP00000004589	BRI3 binding protein	BRI3BP	2048900	0	0	0	0	0	0	0	0	0	0	0	0	0							0						175780	382320	314820	333040	431910	410980	0.000123679	0.000246008	0.000156837	6.42229e-05	8.66545e-05	7.9925e-05	1000
1816	ENSGALP00000043341	AUP1	ENSGALP00000043341	1816	1816	112310	ENSGALP00000004596	Neural precursor cell expressed, developmentally down-regulated 4-like, E3 ubiquitin protein ligase	NEDD4L	483550	0	0	0	0	0	0	0	0	0	0	0	0	0							0						16578	8159.5	11183	167610	140530	139490	1.16643e-05	5.25033e-06	5.57115e-06	3.23217e-05	2.81947e-05	2.71272e-05	1000
1264	ENSGALP00000024069	RABL3	ENSGALP00000024069	1264	1264	36580	ENSGALP00000004621	Electron-transfer-flavoprotein, alpha polypeptide	ETFA	724350	0	0	0	0	0	0	0	0	0	0	0	0	0							0						65149	31631	44966	166720	166570	249310	4.58389e-05	2.03533e-05	2.24012e-05	3.215e-05	3.34191e-05	4.84844e-05	1000
816	ENSGALP00000014317	IDH1	ENSGALP00000014317	816;1532	816	273630	ENSGALP00000004641	Pre-mRNA processing factor 8	PRPF8	681740	0	0	0	0	0	0	0	0	0	0	0	0	0							0						8569.8	0	16299	218480	232800	205600	6.02973e-06		8.11984e-06	4.21314e-05	4.67069e-05	3.99839e-05	1000
1627	ENSGALP00000039011	USP7	ENSGALP00000039011	1627	1627	85627	ENSGALP00000004669	Delta/notch-like EGF repeat containing	DNER	26013	0	0	0	0	0	0	0	0	0	0	0	0	0							0						0	0	14066	0	0	11948			7.00741e-06			2.32358e-06	1000
361	ENSGALP00000006026	ALDH4A1	ENSGALP00000006026	361	361	93598	ENSGALP00000004745	Nucleoporin 93kDa	NUP93	150630	0	0	0	0	0	0	0	0	0	0	0	0	0							0						0	0	0	29389	76929	44309				5.66733e-06	1.54343e-05	8.61696e-06	1000
1440	ENSGALP00000027988	SRSF2	ENSGALP00000027988	1440	1440	119580	ENSGALP00000004775	MKL/myocardin-like 2	MKL2	1192700	0	0	0	0	0	0	0	0	0	0	0	0	0							0						0	0	0	586520	0	606140				0.000113104		0.000117879	1000
1699	ENSGALP00000041351	RSF1	ENSGALP00000041351	1699	1699	25076	ENSGALP00000004817	Peroxiredoxin 6	PRDX6	110970	0	0	0	0	0	0	0	0	0	0	0	0	0							0						0	0	48380	0	0	62591			2.4102e-05			1.21723e-05	1000
1238	ENSGALP00000041069;ENSGALP00000023357;ENSGALP00000041684	PROM1	ENSGALP00000023357;ENSGALP00000041069;ENSGALP00000041684	1238	1238	36056	ENSGALP00000004833	Mitochondrial ribosomal protein L44	MRPL44	163090	0	0	0	0	0	0	0	0	0	0	0	0	0							0						0	0	16791	0	72880	73420			8.36495e-06		1.4622e-05	1.42783e-05	1000
1735	ENSGALP00000041937	BRT-1	ENSGALP00000041937	1735	1735	38216	ENSGALP00000004879	ER lipid raft associated 2	ERLIN2	13514000	0	0	0	0	0	0	0	0	0	0	3121.2	0	0				0.000132053			1	0.000132053			0.00107362	#VALUE!	955830	842540	1448300	2953600	3537200	3773800	0.000672524	0.000542142	0.000721515	0.000569568	0.000709671	0.000733907	1000	0.00107362
1666	ENSGALP00000040598	TIMMDC1	ENSGALP00000040598	1666	1666	154070	ENSGALP00000004930	Contactin associated protein 1	CNTNAP1	358980	0	0	0	0	0	0	0	0	0	0	0	0	0							0						29178	3156.7	0	123340	101320	101980	2.05297e-05	2.03122e-06		2.37847e-05	2.03279e-05	1.98325e-05	1000
401	ENSGALP00000006687;ENSGALP00000033816	ADAM10	ENSGALP00000006687;ENSGALP00000033816	401	401	304870	ENSGALP00000004972	Inositol 1,4,5-trisphosphate receptor, type 3	ITPR3	332370	0	0	0	0	0	0	0	0	0	0	0	0	0							0						23270	10928	38221	93981	91093	74874	1.63728e-05	7.03175e-06	1.9041e-05	1.81232e-05	1.82761e-05	1.45611e-05	1000
447	ENSGALP00000007586	ALDH3A1	ENSGALP00000007586	325;447	447	34369	ENSGALP00000004982	Coatomer protein complex, subunit epsilon	COPE	5778600	0	0	0	0	0	0	0	0	0	0	0	0	0							0						540000	274830	456000	1527300	1379100	1601400	0.000379945	0.000176843	0.00022717	0.000294522	0.00027669	0.000311431	1000
158;1341	ENSGALP00000002482;ENSGALP00000011352;ENSGALP00000018940;ENSGALP00000025553;ENSGALP00000038058;ENSGALP00000041868;ENSGALP00000042820	CPNE1;CPNE3;CPNE4;CPNE7;CPNE8	ENSGALP00000002482;ENSGALP00000041868;ENSGALP00000042820;ENSGALP00000025553	158;1341	158;1341	34732	ENSGALP00000004997	Guanine nucleotide binding protein (G protein), alpha activating activity polypeptide O	GNAO1	3739100	0	0	0	0	0	0	0	0	15636	0	0	0	0		0.000578267					1	0.000578267			0.00470147	#VALUE!	179520	134150	35896	1032200	1063600	1278000	0.000126311	8.63204e-05	1.78827e-05	0.000199048	0.000213391	0.000248538	1000	0.00470147
785	ENSGALP00000013724	AP2M1	ENSGALP00000013724	785	785	35210	ENSGALP00000005047	Surfeit 1	SURF1	601710	0	0	0	0	0	0	0	0	0	0	0	0	0							0						0	32967	0	129500	216230	223020		2.1213e-05		2.49726e-05	4.33824e-05	4.33716e-05	1000
263	ENSGALP00000004275	TMCO1	ENSGALP00000004275	263	263	36711	ENSGALP00000005115	Guanine nucleotide binding protein (G protein), alpha 11 (Gq class)	GNA11	3263900	0	0	0	0	0	0	0	0	0	0	0	0	0							0						141620	89124	129490	929410	1045100	929170	9.96441e-05	5.73479e-05	6.45094e-05	0.000179226	0.000209679	0.0001807	1000
264	ENSGALP00000004317	GLG1	ENSGALP00000004317	264	264	14237	ENSGALP00000005126	SUB1 homolog	SUB1	7568800	0	0	0	0	0	0	0	0	0	0	0	0	0							0						339860	47531	510300	2743200	1613200	2314700	0.000239126	3.05844e-05	0.000254222	0.000528995	0.000323658	0.000450149	1000
232	ENSGALP00000003737	ENO1	ENSGALP00000003737	232;1241	232	47993	ENSGALP00000005132	DnaJ (Hsp40) homolog, subfamily A, member 4	DNAJA4	165390	0	0	0	0	0	0	0	0	0	87912	0	0	0			0.000890706				1	0.000890706			0.00724167	#VALUE!	23449	0	22068	0	31964	0	1.64988e-05		1.09938e-05		6.41296e-06		1000	0.0102164
1648	ENSGALP00000039757	HYOU1	ENSGALP00000039757	1648	1648	95382	ENSGALP00000005145	ATPase, H+ transporting, lysosomal V0 subunit a1	ATP6V0A1	2426400	0	0	0	0	0	0	0	0	0	0	0	0	0							0						221930	154280	238010	555880	590350	665930	0.00015615	9.92733e-05	0.000118572	0.000107195	0.000118442	0.000129506	1000
695	ENSGALP00000012126	GNAS	ENSGALP00000012126	695;1190	695	16374	ENSGALP00000005156	Vesicle-associated membrane protein 4	VAMP4	1269600	0	0	0	0	0	0	0	0	0	0	0	0	0							0						0	0	0	448960	387150	433490				8.65768e-05	7.76742e-05	8.43026e-05	1000
1618	ENSGALP00000038782	NUCB2	ENSGALP00000038782	1618	1618	36064	ENSGALP00000005157	Sideroflexin 1	SFXN1	5374400	0	0	0	0	0	0	0	0	0	0	0	0	0							0						316160	186180	439780	1515300	1566300	1350800	0.000222451	0.0001198	0.00021909	0.000292208	0.000314248	0.000262696	1000
999	ENSGALP00000018057	ABCB10	ENSGALP00000018057	999	999	88170	ENSGALP00000005161	Signal transducer and activator of transcription 3 (acute-phase response factor)	STAT3	66655	0	0	0	0	0	0	0	0	0	0	0	0	0							0						0	7377.8	0	32451	0	26826		4.74733e-06		6.2578e-06		5.21696e-06	1000
1461	ENSGALP00000029745	CXADR	ENSGALP00000029745	1461	1461	54938	ENSGALP00000005212	Histone deacetylase 1	HDAC1	864930	0	0	0	0	0	0	0	0	0	0	0	0	0							0						79946	53121	103950	311910	245240	70771	5.62501e-05	3.41813e-05	5.17859e-05	6.01483e-05	4.92027e-05	1.37631e-05	1000
862	ENSGALP00000015260	SEC62	ENSGALP00000015260	862	862	39312	ENSGALP00000005224	Isocitrate dehydrogenase 3 (NAD+) alpha	IDH3A	1691600	0	0	0	0	0	0	0	0	0	0	0	0	0							0						53949	188840	89035	403200	466020	490510	3.79586e-05	0.000121511	4.43555e-05	7.77525e-05	9.3498e-05	9.53915e-05	1000
1244	ENSGALP00000023468	CADM1	ENSGALP00000023468	1244	1244	22602	ENSGALP00000005231	Transmembrane emp24 domain trafficking protein 2	TMED2	5662800	0	0	0	0	0	0	0	0	0	0	0	0	0							0						255930	318740	272160	1619500	1946600	1249900	0.000180073	0.000205097	0.000135585	0.000312302	0.000390548	0.000243073	1000
788	ENSGALP00000013785	SPINT1	ENSGALP00000013785	788	788	40832	ENSGALP00000005232	ER lipid raft associated 1	ERLIN1	523140	0	0	0	0	0	0	0	0	0	0	0	0	0							0						17911	0	57190	37091	168370	242580	1.26022e-05		2.84909e-05	7.15257e-06	3.37802e-05	4.71755e-05	1000
473	ENSGALP00000008056	ACAD9	ENSGALP00000008056	473	473	52621	ENSGALP00000005262	Fas associated factor family member 2	FAF2	2359500	0	0	0	0	0	0	0	0	0	0	0	0	0							0						72390	0	122630	755180	830380	578920	5.09337e-05		6.10919e-05	0.000145628	0.0001666	0.000112585	1000
949	ENSGALP00000016781;ENSGALP00000042359;ENSGALP00000042075	SYT1;SYT2	ENSGALP00000016781;ENSGALP00000042359	949	949	36489	ENSGALP00000005271	Eukaryotic translation initiation factor 3, subunit I	EIF3I	423100	0	0	0	0	0	0	0	0	0	0	0	0	0							0						0	19640	0	101230	162380	139850		1.26376e-05		1.9521e-05	3.25784e-05	2.71972e-05	1000
1784	ENSGALP00000042738	HS2ST1	ENSGALP00000042738	1784	1784	28128	ENSGALP00000005281	Clathrin, light chain B	CLTB	650210	0	0	0	0	0	0	0	0	0	0	0	0	0							0						0	0	0	324880	151590	173740				6.26494e-05	3.04136e-05	3.37879e-05	1000
1323	ENSGALP00000025152	TRAM1	ENSGALP00000025152	1323	1323	44326	ENSGALP00000005299	FK506 binding protein 8, 38kDa	FKBP8	670220	0	0	0	0	0	0	0	0	0	0	0	0	0							0						0	0	0	110920	284640	274660				2.13896e-05	5.71076e-05	5.34143e-05	1000
1668	ENSGALP00000040628;ENSGALP00000041458	NDUFV1	ENSGALP00000040628;ENSGALP00000041458	1668	1668	23553	ENSGALP00000005302_family	Family {RAB5C, member RAS oncogene family}	RAB5C;RAB5A	10096000	0	0	0	0	0	0	0	0	0	0	0	0	0							0						362160	368600	729140	2561620	3098650	2975870	0.000254816	0.00023718	0.000363243	0.000493979	0.000621685	0.00057873	1000
353	ENSGALP00000005939	ANO5	ENSGALP00000005939	353	353	70894	ENSGALP00000005362	Ras homolog family member T1	RHOT1	360460	0	0	0	0	0	0	0	0	0	0	0	0	0							0						17645	11576	28722	66545	91503	144470	1.24151e-05	7.44871e-06	1.43087e-05	1.28324e-05	1.83583e-05	2.80957e-05	1000
564	ENSGALP00000009811	PLEKHA7	ENSGALP00000009811	564	564	75109	ENSGALP00000005363	ADAM metallopeptidase domain 9	ADAM9	4596.9	0	0	0	0	0	0	0	0	0	0	0	0	0							0						0	4596.9	0	0	0	0		2.95793e-06					1000
1769	ENSGALP00000042580	OTOL1	ENSGALP00000042580	1769	1769	17189	ENSGALP00000005448	Microsomal glutathione S-transferase 3	MGST3	5113400	0	0	0	0	0	0	0	0	0	0	0	0	0							0						139590	300420	385350	1287400	1356300	1644300	9.82158e-05	0.000193309	0.000191974	0.00024826	0.000272116	0.000319774	1000
518	ENSGALP00000038262;ENSGALP00000008849	SRSF1	ENSGALP00000008849;ENSGALP00000038262	518	518	47236	ENSGALP00000005468	2',3'-cyclic nucleotide 3' phosphodiesterase	CNP	6048300	0	0	0	0	0	0	0	0	0	0	0	0	0							0						391510	507270	472730	1528500	1502600	1645600	0.000275467	0.000326409	0.000235505	0.000294754	0.000301468	0.000320027	1000
1493	ENSGALP00000033071	LCMT1	ENSGALP00000033071	1493	1493	12106	ENSGALP00000005475	Oncomodulin (parvalbumin 3)	OCM	17442000	0	0	0	0	0	0	0	0	338160	636570	0	0	0		0.0125062	0.00644959				2	0.0094779	0.00428267	0.00174839	0.0770578	0.0266961	974850	377760	1148500	4053700	3970300	5942100	0.000685906	0.000243074	0.00057216	0.000781709	0.000796565	0.00115558	1000	0.0770578
887;906;1781	ENSGALP00000010239;ENSGALP00000015657;ENSGALP00000015988;ENSGALP00000018042;ENSGALP00000023523;ENSGALP00000039176;ENSGALP00000042680;NP_001007825.1;NP_001026234.1;NP_001026400.1;NP_001072949.1;NP_990503.1;NP_990849.1	ACTG1;ACTA1;ACTA2;ACTB;ACTBL2;ACTC1;ACTG2	ENSGALP00000042680;NP_001072949.1;NP_001026234.1;ENSGALP00000018042;ENSGALP00000015988;NP_990503.1;NP_001026400.1;ENSGALP00000010239;ENSGALP00000023523;NP_990849.1;ENSGALP00000015657;NP_001007825.1;ENSGALP00000039176	887;906;1781	887;906;1781	164600	ENSGALP00000005497	Lemur tyrosine kinase 2	LMTK2	3929.9	0	0	0	0	0	0	0	3929.9	0	0	0	0	0	5.30747e-05						1	5.30747e-05			0.000431511	#VALUE!	0	0	0	0	0	0							1000	0.000431511
1262	ENSGALP00000023991	ITGA2	ENSGALP00000023991	1262	1262	57091	ENSGALP00000005520	Aldehyde dehydrogenase 9 family, member A1	ALDH9A1	242520	0	0	0	0	0	0	0	0	0	0	0	0	0							0						25528	0	0	61792	62442	92761	1.79615e-05			1.19159e-05	1.25278e-05	1.80396e-05	1000
1472	ENSGALP00000030701	GLDN	ENSGALP00000030701	1472	1472	67859	ENSGALP00000005545	Kelch-like family member 20	KLHL20	14392	0	0	0	0	0	0	0	0	0	0	0	0	0							0						0	0	0	0	0	14392						2.79887e-06	1000
267	ENSGALP00000004371	TSPAN3	ENSGALP00000004371	267	267	94411	ENSGALP00000005548	T-cell, immune regulator 1, ATPase, H+ transporting, lysosomal V0 subunit A3 (TCIRG1	TCIRG1	292490	0	0	0	0	0	0	0	0	0	0	0	0	0							0						0	0	21059	83812	106500	81126			1.04912e-05	1.61622e-05	2.13672e-05	1.57769e-05	1000
1537	ENSGALP00000035610	UVRAG	ENSGALP00000035610	1537	1537	47655	ENSGALP00000005565	Retinoblastoma binding protein 4	RBBP4	3492300	0	0	0	0	0	0	0	0	0	0	0	0	0							0						222270	162420	334410	854950	922320	995960	0.00015639	0.000104511	0.000166597	0.000164867	0.000185046	0.000193688	1000
736	ENSGALP00000012920	PGAP1	ENSGALP00000012920	736	736	121680	ENSGALP00000005587	Solute carrier family 12 (potassium/chloride transporter), member 4	SLC12A4	132830	0	0	0	0	0	0	0	0	0	0	0	0	0							0						9893.9	0	19759	29293	44272	29617	6.96136e-06		9.84355e-06	5.64882e-06	8.88233e-06	5.75974e-06	1000
1669	ENSGALP00000040638	SNRNP200	ENSGALP00000040638	1669	1669	27237	ENSGALP00000005628	Peroxisomal biogenesis factor 11 gamma	PEX11G	433170	0	0	0	0	0	0	0	0	0	0	0	0	0							0						68148	74482	57089	58906	59771	114770	4.7949e-05	4.79263e-05	2.84406e-05	1.13593e-05	1.19919e-05	2.23198e-05	1000
1785	ENSGALP00000042813	DDX23	ENSGALP00000042813	1785	1785	64946	ENSGALP00000005649	Lysophosphatidylcholine acyltransferase 2	LPCAT2	48147	0	0	0	0	0	0	0	0	0	0	0	0	0							0						0	0	0	0	19180	28967					3.8481e-06	5.63333e-06	1000
1023	ENSGALP00000018540	SLC44A5	ENSGALP00000018540	1023	1023	273250	ENSGALP00000005654	Fibronectin 1	FN1	288740	0	0	0	0	0	0	0	0	0	0	0	0	0							0						32236	14603	50373	56870	71779	62877	2.26813e-05	9.39647e-06	2.50948e-05	1.09667e-05	1.44011e-05	1.2228e-05	1000
225	ENSGALP00000003642	AQPEP	ENSGALP00000003642	225	225	153350	ENSGALP00000005655_family	Family {Insulin receptor}	INSR;IGF1R	82912	0	0	0	0	0	0	0	0	0	0	0	0	0							0						6158.5	4171.8	9862.8	21315.7	31356.6	10047	4.33313e-06	2.68439e-06	4.91345e-06	4.11049e-06	6.2911e-06	1.95388e-06	1000
1233	ENSGALP00000023294;ENSGALP00000023295	CHD4;CHD5	ENSGALP00000023294;ENSGALP00000023295	1233	1233	212630	ENSGALP00000005673	Ankyrin 1, erythrocytic	ANK1	69245	0	0	0	0	0	0	0	0	0	0	0	0	0							0						8850.2	4422.8	5642.3	25603	13093	11633	6.22702e-06	2.8459e-06	2.81088e-06	4.93724e-06	2.62686e-06	2.26232e-06	1000
1814	ENSGALP00000043320	PTGES	ENSGALP00000043320	1814	1814	27346	ENSGALP00000005680	Adenylate kinase 2	AK2	392010	0	0	0	0	0	0	0	0	0	0	0	0	0							0						51974	25611	106530	54321	153570	0	3.6569e-05	1.64797e-05	5.30712e-05	1.04752e-05	3.08109e-05		1000
1293	ENSGALP00000024700;ENSGALP00000042773	CPLX1;CPLX2	ENSGALP00000024700;ENSGALP00000042773	1293	1293	71226	ENSGALP00000005711	Aspartyl-tRNA synthetase 2, mitochondrial	DARS2	0	0	0	0	0	0	0	0	0	0	0	0	0	0							0						0	0	0	0	0	0							1000
1453	ENSGALP00000028961	VDAC3	ENSGALP00000028961	1453	1453	12651	ENSGALP00000005729	NADH dehydrogenase (ubiquinone) Fe-S protein 5, 15kDa (NADH-coenzyme Q reductase)	NDUFS5	13295000	0	0	0	0	0	0	0	0	0	0	0	0	0							0						1723100	999050	1507500	2705800	3183500	3175800	0.00121238	0.000642851	0.000751007	0.000521782	0.000638708	0.000617611	1000
1741	ENSGALP00000042074	UBTF	ENSGALP00000042074	1741	1741	41075	ENSGALP00000005777	ATPase family, AAA domain containing 1	ATAD1	308390	0	0	0	0	0	0	0	0	0	0	0	0	0							0						0	0	0	120470	109640	78270				2.32313e-05	2.19972e-05	1.52215e-05	1000
799	ENSGALP00000013968	EEF1B2	ENSGALP00000013968	799	799	47065	ENSGALP00000005789	Adaptor-related protein complex 3, mu 2 subunit	AP3M2	217670	0	0	0	0	0	23127	1	0	0	0	0	0	0							0						15069	0	0	115620	0	63848	1.06026e-05			2.2296e-05		1.24168e-05	1000
474	ENSGALP00000008066;ENSGALP00000041550	TMEM35	ENSGALP00000008066;ENSGALP00000041550	474	474	54679	ENSGALP00000005799	Phosphatidylinositol glycan anchor biosynthesis, class S	PIGS	1311400	0	0	0	0	0	0	0	0	0	0	0	0	0							0						120230	30743	71087	313110	419190	357020	8.4594e-05	1.97819e-05	3.54142e-05	6.03797e-05	8.41024e-05	6.94312e-05	1000
148	ENSGALP00000002349	CAPZA1	ENSGALP00000002349	148	148	46489	ENSGALP00000005819	Glutamate-ammonia ligase	GLUL	397280	0	0	0	0	0	0	0	0	0	0	0	0	0							0						0	30277	0	205810	77872	83321		1.94821e-05		3.96881e-05	1.56235e-05	1.62038e-05	1000
95	ENSGALP00000001340;ENSGALP00000001321	CHST5	ENSGALP00000001340	95	95	88665	ENSGALP00000005822	Topoisomerase (DNA) I	TOP1	1033100	0	0	0	0	0	0	0	0	0	0	0	0	0							0						22924	9024.3	34549	300140	365720	300710	1.61294e-05	5.80679e-06	1.72116e-05	5.78785e-05	7.33747e-05	5.84803e-05	1000
106	ENSGALP00000001479	SEPN1	ENSGALP00000001479	106	106	154830	ENSGALP00000005832	Nucleoporin 155kDa	NUP155	344210	0	0	0	0	0	0	0	0	0	0	0	0	0							0						13757	0	12011	154810	91275	72362	9.67945e-06		5.98365e-06	2.98533e-05	1.83126e-05	1.40725e-05	1000
1822	ENSGALP00000043470	GPX2	ENSGALP00000043470	1822	1822	613780	ENSGALP00000005847	Microtubule-actin crosslinking factor 1	MACF1	14100	0	0	0	0	0	0	0	508.85	0	815.68	0	472.65	0	6.8722e-06		8.2643e-06		1.0901e-05		3	8.67915e-06	2.04617e-06	8.35344e-07	7.05638e-05	1.232e-05	0	502.69	0	4790	4909.2	2101.3		3.23462e-07		9.23696e-07	9.84937e-07	4.08649e-07	1000	0.00170422
643	ENSGALP00000011181;ENSGALP00000029412;ENSGALP00000027838	DLG1;DLG2	ENSGALP00000011181	643	643	75556	ENSGALP00000005883	Chloride channel, voltage-sensitive Ka	CLCNKA	140940	0	0	0	0	0	0	0	0	0	0	0	0	0							0						0	0	0	69313	0	71628				1.33662e-05		1.39298e-05	1000
398	ENSGALP00000006624	VPS26A	ENSGALP00000006624	398	398	106470	ENSGALP00000005939	Anoctamin 5 (ANO5	ANO5	232090	0	0	0	0	0	0	0	0	0	0	0	0	0							0						0	13853	0	80770	32123	105350		8.91388e-06		1.55756e-05	6.44487e-06	2.04879e-05	1000
1268	ENSGALP00000024150	ATP1A1	ENSGALP00000024150	599;1268	1268	38640	ENSGALP00000005971	Annexin A2	ANXA2	46945000	0	0	0	0	0	0	0	0	0	34561	0	32114	0			0.000350165		0.000740661		2	0.000545413	0.000276122	0.000112726	0.00443435	0.00169486	3599400	3268300	5924700	10970000	11854000	11262000	0.00253254	0.00210303	0.00295157	0.00211544	0.00237828	0.00219017	1000	0.00443435
599	ENSGALP00000010431	ATP12A	ENSGALP00000010431	599;1268	599	19113	ENSGALP00000005973	Stromal cell-derived factor 2	SDF2	292640	0	0	0	0	0	0	0	0	0	0	0	0	0							0						0	0	0	202050	0	90589				3.8963e-05		1.76172e-05	1000
1122	ENSGALP00000020641	ALDH5A1	ENSGALP00000020641	1122	1122	89773	ENSGALP00000005983	NEL-like 1 (chicken)	NELL1	30998	0	0	0	0	0	0	0	0	0	0	0	0	0							0						0	0	0	16584	14414	0				3.19803e-06	2.89189e-06		1000
315	ENSGALP00000005299	FKBP8	ENSGALP00000005299	315	315	33213	ENSGALP00000005984	Transmembrane protein 38A	TMEM38A	175960	0	0	0	0	0	0	0	0	0	0	0	0	0							0						0	0	0	175960	0	0				3.39319e-05			1000
97	ENSGALP00000001406	SMPD2	ENSGALP00000001406	97	97	105510	ENSGALP00000005991	Sad1 and UNC84 domain containing 1	SUN1	402710	0	0	0	0	0	0	0	0	0	0	0	0	0							0						0	14568	36194	68516	134440	148990		9.37395e-06	1.80311e-05	1.32125e-05	2.69728e-05	2.89747e-05	1000
496	ENSGALP00000008338	DDB1	ENSGALP00000008338	496	496	44375	ENSGALP00000006008	Solute carrier family 35, member E1	SLC35E1	657590	0	0	0	0	0	0	0	0	0	0	0	0	0							0						127360	0	29416	179490	158410	162920	8.96107e-05		1.46545e-05	3.46126e-05	3.17819e-05	3.16837e-05	1000
1572	ENSGALP00000037222	HNRNPDL	ENSGALP00000037222	1572	1572	70139	ENSGALP00000006018	Poly(A) binding protein, cytoplasmic 4 (inducible form)	PABPC4	311970	0	0	0	0	0	0	0	0	0	0	0	0	0							0						30987	23201	32678	75132	76100	73867	2.18025e-05	1.4929e-05	1.62795e-05	1.44883e-05	1.5268e-05	1.43652e-05	1000
1234	ENSGALP00000023303	ZNF384	ENSGALP00000023303	1234	1234	60626	ENSGALP00000006026	Aldehyde dehydrogenase 4 family, member A1	ALDH4A1	134620	0	0	0	0	0	0	0	0	0	0	0	0	0							0						0	0	0	36116	39112	59398				6.96455e-06	7.84707e-06	1.15514e-05	1000
1653	ENSGALP00000039965	COPA	ENSGALP00000039965	1653	1653	68853	ENSGALP00000006039	Ribophorin II	RPN2	47972000	0	0	0	0	0	0	0	0	0	26408	6765.9	11297	0			0.00026756	0.000286254	0.000260548		3	0.000271454	1.32878e-05	5.42472e-06	0.00220699	0.000249252	3263300	1854900	4424700	12868000	12818000	12699000	0.00229606	0.00119356	0.0022043	0.00248145	0.00257169	0.00246963	1000	0.00220699
182	ENSGALP00000008663;ENSGALP00000002960	DYNLRB1;DYNLRB2	ENSGALP00000002960;ENSGALP00000008663	182	182	21288	ENSGALP00000006046	Actin related protein 2/3 complex, subunit 3, 21kDa	ARPC3	260490	0	0	0	0	0	0	0	0	0	0	0	0	0							0						0	0	89126	0	0	171360			4.44008e-05			3.33251e-05	1000
1400	ENSGALP00000026942	RP2	ENSGALP00000026942	1400	1400	44542	ENSGALP00000006050	Calcium homeostasis endoplasmic reticulum protein	CHERP	58650	0	0	0	0	0	0	0	0	0	0	0	0	0							0						0	0	26760	31890	0	0			1.33313e-05	6.14962e-06			1000
132	ENSGALP00000002039	FAM18B1	ENSGALP00000002039	132	132	35957	ENSGALP00000006065	Testis expressed 264	TEX264	532640	0	0	0	0	0	0	0	0	0	0	0	0	0							0						77228	0	134180	0	286480	34754	5.43377e-05		6.68459e-05		5.74767e-05	6.75876e-06	1000
290	ENSGALP00000004775	MKL2	ENSGALP00000004775	290	290	29155	ENSGALP00000006160	Syntaxin 6	STX6	1422000	0	0	0	0	0	0	0	0	0	0	0	0	0							0						36946	42626	117930	356130	408940	459430	2.59953e-05	2.74282e-05	5.87504e-05	6.86756e-05	8.2046e-05	8.93473e-05	1000
674	ENSGALP00000011635	STXBP1	ENSGALP00000011635	674	674	32328	ENSGALP00000006172	Sarcoglycan, delta (35kDa dystrophin-associated glycoprotein)	SGCD	826810	0	0	0	0	0	0	0	0	0	0	0	0	0							0						135140	106720	109040	108900	228480	138530	9.50847e-05	6.86703e-05	5.43216e-05	2.10001e-05	4.58401e-05	2.69405e-05	1000
1522	ENSGALP00000034617	MT-ATP6	ENSGALP00000034617	1522	1522	64373	ENSGALP00000006210	Phosphatidylinositol glycan anchor biosynthesis, class T	PIGT	1495700	0	0	0	0	0	0	0	0	0	0	0	0	0							0						47590	60453	48370	457000	548310	333980	3.34844e-05	3.88992e-05	2.4097e-05	8.81272e-05	0.000110008	6.49505e-05	1000
740	ENSGALP00000012944	CLN6	ENSGALP00000012944	740	740	57591	ENSGALP00000006218	CAP, adenylate cyclase-associated protein 1	CAP1	1168000	0	0	0	0	0	0	0	0	0	0	0	0	0							0						60719	24786	655990	123820	119720	183010	4.2722e-05	1.59488e-05	0.000326801	2.38773e-05	2.40195e-05	3.55907e-05	1000
466	ENSGALP00000007941	FBN1	ENSGALP00000007941	466	466	339610	ENSGALP00000006240	Collagen, type VI, alpha 3	COL6A3	26366	0	0	0	0	0	0	0	0	0	0	0	0	0							0						3155.1	2002.3	4112.1	4343.3	4095.1	8658.1	2.21993e-06	1.2884e-06	2.04857e-06	8.37555e-07	8.21603e-07	1.68378e-06	1000
1724	ENSGALP00000041756	DJ-1	ENSGALP00000041756	1724	1724	72650	ENSGALP00000006256	Quiescin Q6 sulfhydryl oxidase 1	QSOX1	168140	0	0	0	0	0	0	0	0	0	0	0	0	0							0						8350.1	0	10200	0	66054	83532	5.87514e-06		5.08144e-06		1.32525e-05	1.62448e-05	1000
1645	ENSGALP00000039730	SLC9A9	ENSGALP00000039730	1645	1645	76845	ENSGALP00000006278	Protein kinase C, alpha	PRKCA	553710	0	0	0	0	0	0	0	0	0	0	0	0	0							0						10418	19626	45874	115490	121400	240910	7.33012e-06	1.26286e-05	2.28535e-05	2.22709e-05	2.43566e-05	4.68508e-05	1000
921	ENSGALP00000016361	RPS3A	ENSGALP00000016361	921	921	36656	ENSGALP00000006284	Heterogeneous nuclear ribonucleoprotein H3 (2H9)	HNRNPH3	6608400	0	0	0	0	0	0	0	0	0	0	0	0	0							0						957250	795330	862480	1285800	1331800	1375700	0.000673523	0.000511765	0.000429671	0.000247952	0.0002672	0.000267538	1000
1260	ENSGALP00000032219;ENSGALP00000023976	ITGA1	ENSGALP00000023976;ENSGALP00000032219	1260	1260	48556	ENSGALP00000006300	Adaptor-related protein complex 1, mu 1 subunit	AP1M1	56966000	0	0	56812000	0	0	0	1	0	0	0	0	0	0							0						0	0	0	67996	65444	20004				1.31122e-05	1.31301e-05	3.89026e-06	1000
923	ENSGALP00000016394	FAM160A1	ENSGALP00000016394	923	923	17656	ENSGALP00000006308	Ribosomal protein L23a	RPL23A	22846000	0	0	0	0	0	0	0	0	0	0	75419	0	0				0.00319085			1	0.00319085			0.0259425	#VALUE!	618850	551010	1135300	6694500	7480100	6290700	0.000435424	0.000354554	0.000565584	0.00129096	0.00150074	0.00122338	1000	0.0259425
1208	ENSGALP00000022759	OCIAD1	ENSGALP00000022759	1208	1208	110110	ENSGALP00000006311	ER membrane protein complex subunit 1	EMC1	2809900	0	0	0	0	0	0	0	0	0	0	0	0	0							0						180890	145870	175020	825350	708390	774370	0.000127275	9.38618e-05	8.71916e-05	0.000159159	0.000142125	0.000150595	1000
861	ENSGALP00000015257	RRBP1	ENSGALP00000015257	861	861	28348	ENSGALP00000006318	Calfacilitin	TLCD1	287150	0	0	0	0	0	0	0	0	0	0	0	0	0							0						0	0	0	167090	120060	0				3.22214e-05	2.40877e-05		1000
663	ENSGALP00000011537	ALDH1A3	ENSGALP00000011537	441;663;1281	663	39099	ENSGALP00000006326	Twinfilin actin-binding protein 2	TWF2	267150	0	0	0	0	0	0	0	0	0	0	0	0	0							0						22711	0	9564.4	46726	78239	109910	1.59795e-05		4.7648e-06	9.01057e-06	1.56972e-05	2.13747e-05	1000
1437	ENSGALP00000027920	SPCS2	ENSGALP00000027920	1437	1437	64521	ENSGALP00000006366	Apoptosis-inducing factor, mitochondrion-associated, 1	AIFM1	4573800	0	0	0	0	0	0	0	0	0	0	0	0	0							0						348850	161430	465760	1332900	1020300	1244600	0.000245451	0.000103874	0.000232033	0.000257034	0.000204704	0.000242043	1000
1691	ENSGALP00000041134	MFAP1	ENSGALP00000041134	1691	1691	40958	ENSGALP00000006372	Aldo-keto reductase family 7, member A2 (aflatoxin aldehyde reductase)	AKR7A2	245600	0	0	0	0	0	0	0	0	0	0	0	0	0							0						0	0	0	106140	91276	48180				2.04679e-05	1.83128e-05	9.36977e-06	1000
1009	ENSGALP00000018276	AGPAT9	ENSGALP00000018276	1009	1009	55906	ENSGALP00000006386	Torsin A interacting protein 2	TOR1AIP2	33515	0	0	0	0	0	0	0	0	0	0	0	0	0							0						0	0	0	33515	0	0				6.46298e-06			1000
241	ENSGALP00000003898	MATR3	ENSGALP00000003898	241	241	95996	ENSGALP00000006403	Matrilin 4	MATN4	917580	0	0	0	0	0	0	0	0	0	0	0	0	0							0						9246	25366	21899	285410	281960	293700	6.5055e-06	1.63221e-05	1.09097e-05	5.5038e-05	5.65699e-05	5.71171e-05	1000
1358	ENSGALP00000025979	PSCA	ENSGALP00000025979	1358	1358	27913	ENSGALP00000006409	TM2 domain containing 3	TM2D3	124600	0	0	0	0	0	0	0	0	0	0	0	0	0							0						0	0	0	0	0	124600						2.42315e-05	1000
1239	ENSGALP00000023364	NOP56	ENSGALP00000023364	1239	1239	70192	ENSGALP00000006412	UDP-N-acetyl-alpha-D-galactosamine:polypeptide N-acetylgalactosaminyltransferase 10 (GalNAc-T10)	GALNT10	517170	0	0	0	0	0	0	0	0	0	0	0	0	0							0						0	5411.7	15595	178830	167470	149860		3.48222e-06	7.76913e-06	3.44853e-05	3.35996e-05	2.91439e-05	1000
233	ENSGALP00000003740	MRPS17	ENSGALP00000003740	233	233	30610	ENSGALP00000006414	Capping protein, beta 2	CAPZB2	944600	0	0	0	0	0	0	0	0	0	0	0	0	0							0						0	20386	0	250320	399800	274100		1.31176e-05		4.82713e-05	8.02122e-05	5.33054e-05	1000
560	ENSGALP00000009751	CHCHD6	ENSGALP00000009751	560	560	8489.8	ENSGALP00000006421	Mitochondrial inner membrane organizing system 1 (MINOS1), nuclear gene encoding mitochondrial protein, mRNA.	MINOS1	394990	0	0	0	0	0	0	0	0	0	0	0	0	0							0						0	0	0	394990	0	0				7.61693e-05			1000
1005	ENSGALP00000018174	CYP46A1	ENSGALP00000018174	1005	1005	66826	ENSGALP00000006434	Integrin alpha FG-GAP repeat containing 1	ITFG1	399360	0	0	0	0	0	0	0	0	0	0	0	0	0							0						0	0	0	199080	113370	86912				3.83903e-05	2.27455e-05	1.69021e-05	1000
787	ENSGALP00000013761	NOP58	ENSGALP00000013761	787	787	28271	ENSGALP00000006522	Integral membrane protein 2A	ITM2A	545330	0	0	0	0	0	0	0	0	0	0	0	0	0							0						0	0	16357	19311	280800	228860			8.14874e-06	3.7239e-06	5.63371e-05	4.45074e-05	1000
343	ENSGALP00000005789	AP3M2	ENSGALP00000005789	343	343	42898	ENSGALP00000006532	DnaJ (Hsp40) homolog, subfamily A, member 2	DNAJA2	34338	0	0	0	0	0	0	0	0	0	34338	0	0	0			0.000347905				1	0.000347905			0.00282856	#VALUE!	0	0	0	0	0	0							1000	0.00282856
1178	ENSGALP00000021940	SPTLC1	ENSGALP00000021940	1178	1178	31286	ENSGALP00000006566	Serine/arginine-rich splicing factor 10	SRSF10	700750	0	0	0	0	0	0	0	0	0	0	0	0	0							0						56261	34791	54660	159240	285340	110460	3.95853e-05	2.23867e-05	2.72305e-05	3.07076e-05	5.7248e-05	2.14816e-05	1000
1551	ENSGALP00000036304	CCT7	ENSGALP00000036304	1551	1551	52440	ENSGALP00000006604	GTPase activating protein (SH3 domain) binding protein 1	G3BP1	204180	0	0	0	0	0	0	0	0	0	0	0	0	0							0						0	0	0	60234	0	143950				1.16154e-05		2.79946e-05	1000
831	ENSGALP00000014662;ENSGALP00000021520	JAG1;JAG2	ENSGALP00000014662	831	831	39222	ENSGALP00000006612	Torsin family 1, member A (torsin A)	TOR1A	79318	0	0	0	0	0	0	0	0	0	0	0	0	0							0						0	0	0	24059	26653	28607				4.6395e-06	5.34741e-06	5.56332e-06	1000
1364	ENSGALP00000026115	CASK	ENSGALP00000026115	1364	1364	131320	ENSGALP00000006618	Fibronectin type III domain containing 3C2	FND3C2	172680	0	0	0	0	0	0	0	0	0	0	0	0	0							0						18966	12019	0	20239	44442	77015	1.33445e-05	7.73377e-06		3.90286e-06	8.91644e-06	1.49774e-05	1000
1329	ENSGALP00000025213	ADD1	ENSGALP00000025213	1329	1329	37995	ENSGALP00000006624	Vacuolar protein sorting 26 homolog A	VPS26A	176990	0	0	0	0	0	0	0	0	0	0	0	0	0							0						0	0	0	120430	0	56554				2.32235e-05		1.09983e-05	1000
1571	ENSGALP00000037166	CEBPZ	ENSGALP00000037166	1571	1571	104660	ENSGALP00000006635	Glucosidase, alpha; acid	GAA	14787	0	0	0	0	0	0	0	0	0	0	0	0	0							0						0	0	4874.5	0	9912.5	0			2.42838e-06		1.98875e-06		1000
1252	ENSGALP00000023825	SLC30A5	ENSGALP00000023825	1252	1252	80365	ENSGALP00000006687	ADAM metallopeptidase domain 10	ADAM10	231460	0	0	0	0	0	0	0	0	0	0	0	0	0							0						11086	0	0	82690	81351	56334	7.80013e-06			1.59458e-05	1.63215e-05	1.09555e-05	1000
658	ENSGALP00000011502	APOAIV	ENSGALP00000011502	658	658	50439	ENSGALP00000006699	Serine incorporator 3 precursor	SERINC3	340240	0	0	0	0	0	0	0	0	0	0	0	0	0							0						0	0	64221	121850	154170	0			3.19937e-05	2.34974e-05	3.09313e-05		1000
1715	ENSGALP00000041628	HSD17B12	ENSGALP00000041628	1715	1715	102760	ENSGALP00000006708	Hexokinase 1	HK1	11043000	0	0	0	0	0	0	0	0	0	0	0	0	0							0						1053600	871720	1395600	2461200	2827500	2433800	0.000741315	0.000560919	0.000695261	0.000474614	0.000567284	0.000473311	1000
1386	ENSGALP00000026399	SNTB1	ENSGALP00000026399	1386	1386	46561	ENSGALP00000006719	Family with sequence similarity 20, member B	FAM20B	1340200	0	0	0	0	0	0	0	0	0	0	0	0	0							0						77463	34548	156710	331650	477430	262350	5.45031e-05	2.22303e-05	7.80699e-05	6.39549e-05	9.57872e-05	5.10203e-05	1000
531	ENSGALP00000009087	PTTG1IP	ENSGALP00000009087	531	531	85531	ENSGALP00000006778	Eukaryotic translation initiation factor 3, subunit B	EIF3B	437360	0	0	0	0	0	0	0	0	0	0	0	0	0							0						0	0	0	88050	143200	206110				1.69794e-05	2.87303e-05	4.00831e-05	1000
189	ENSGALP00000003058	UBE2O	ENSGALP00000003058	189	189	149160	ENSGALP00000006826	Cingulin-like 1	CGNL1	10686	0	0	0	0	0	0	0	0	0	0	0	0	0							0						10686	0	0	0	0	0	7.51869e-06						1000
1114	ENSGALP00000020459	GPD2	ENSGALP00000020459	1114	1114	150770	ENSGALP00000006827	Carboxypeptidase D	CPD	1533900	0	0	0	0	0	0	0	0	0	0	0	0	0							0						55919	53793	92181	416850	444850	470280	3.93447e-05	3.46137e-05	4.59228e-05	8.03847e-05	8.92506e-05	9.14573e-05	1000
271	ENSGALP00000004444	VAT1	ENSGALP00000004444	271	271	61577	ENSGALP00000006885	Prolyl 4-hydroxylase, alpha polypeptide I	P4HA1	7776400	0	0	0	0	0	0	0	0	0	0	0	0	0							0						564470	668260	667390	1963300	1833800	2079200	0.000397162	0.00043	0.000332481	0.0003786	0.000367917	0.000404351	1000
874	ENSGALP00000015493	VTI1B	ENSGALP00000015493	874	874	28039	ENSGALP00000006887	Golgi SNAP receptor complex member 1	GOSR1	1163200	0	0	0	0	0	0	0	0	0	0	0	0	0							0						72073	65106	85635	323290	264970	352080	5.07107e-05	4.18932e-05	4.26617e-05	6.23428e-05	5.31612e-05	6.84705e-05	1000
1053	ENSGALP00000019039	SOD2	ENSGALP00000019039	1053	1053	186420	ENSGALP00000006896	ATP-binding cassette, sub-family A (ABC1), member 5	ABCA5	286790	0	0	0	0	0	0	0	0	0	0	0	0	0							0						12152	0	35426	74077	92216	72917	8.55017e-06		1.76485e-05	1.42849e-05	1.85014e-05	1.41805e-05	1000
915	ENSGALP00000016182;ENSGALP00000037555	LRPPRC;Q5ZIN9	ENSGALP00000016182	915	915	184780	ENSGALP00000006898	ATP-binding cassette, sub-family A (ABC1), member 10	ABCA10	336240	0	0	0	0	0	0	0	0	0	0	0	0	0							0						7002.7	9629.7	20246	103020	115370	80964	4.92711e-06	6.19634e-06	1.00862e-05	1.98662e-05	2.31468e-05	1.57454e-05	1000
286	ENSGALP00000004621	ETFA	ENSGALP00000004621	286	286	137400	ENSGALP00000006909	Collagen, type XVIII, alpha 1	COL18A1	844230	0	0	0	0	0	0	0	0	0	0	0	0	0							0						29816	51228	46065	298630	268820	149680	2.09786e-05	3.29633e-05	2.29487e-05	5.75874e-05	5.39336e-05	2.91089e-05	1000
541	ENSGALP00000009420	COPG1	ENSGALP00000009420	541;760	541	39058	ENSGALP00000006935	Mitochondrial calcium uniporter	MCU	906620	0	0	0	0	0	0	0	0	0	0	0	0	0							0						40633	27699	0	230130	368510	239660	2.85894e-05	1.78233e-05		4.43779e-05	7.39345e-05	4.66077e-05	1000
1843	REV__ENSGALP00000037046	REV__ENSGALP00000037046	REV__ENSGALP00000037046	1843	1843	75282	ENSGALP00000006938	Annexin A6	ANXA6	45522000	0	0	0	0	0	0	0	0	0	0	0	0	0							0						2691900	2154500	4186000	11231000	12468000	12790000	0.00189403	0.00138634	0.00208538	0.00216577	0.00250147	0.00248732	1000
1764	ENSGALP00000042455	PSMA7	ENSGALP00000042455	1764	1764	54741	ENSGALP00000006962	Mitochondrial calcium uptake 1	MICU1	233290	0	0	0	0	0	0	0	0	0	0	0	0	0							0						0	0	0	51026	84642	97618				9.83978e-06	1.69818e-05	1.89842e-05	1000
1421	ENSGALP00000027401	SUCLA2	ENSGALP00000027401	1421	1421	49289	ENSGALP00000006963	Potassium inwardly-rectifying channel, subfamily J, member 16	KCNJ16	35183	0	0	0	0	0	0	0	0	0	0	0	0	0							0						0	0	0	0	35183	0					7.0588e-06		1000
1052	ENSGALP00000019031	ALB	ENSGALP00000019031	1052	1052	91740	ENSGALP00000006965	Vacuolar protein sorting 35 homolog	VPS35	120990	0	0	0	0	0	0	0	0	0	0	0	0	0							0						0	15967	0	0	53042	51982		1.02742e-05			1.06419e-05	1.01092e-05	1000
410	ENSGALP00000006896	ABCA5	ENSGALP00000006896	410	410	93483	ENSGALP00000007003	Cell cycle progression 1	CCPG1	377350	0	0	0	0	0	0	0	0	0	0	0	0	0							0						33997	19142	21044	98641	91421	113110	2.39203e-05	1.23171e-05	1.04837e-05	1.90218e-05	1.83419e-05	2.1997e-05	1000
684	ENSGALP00000011843	CTNND1	ENSGALP00000011843	684	684	35176	ENSGALP00000007021	Solute carrier family 39, member 11	SLC39A11	730740	0	0	0	0	0	0	0	0	0	0	0	0	0							0						0	0	47225	195310	277220	210980			2.35266e-05	3.76633e-05	5.56189e-05	4.10302e-05	1000
1067	ENSGALP00000019271	CANT1	ENSGALP00000019271	1067	1067	158650	ENSGALP00000007030	Sidekick cell adhesion molecule 1	SDK1	183670	0	0	0	0	0	0	0	0	0	0	0	0	0							0						0	0	0	172510	0	11163				3.32666e-05		2.17092e-06	1000
159	ENSGALP00000002493	RPL23	ENSGALP00000002493	159	159	38130	ENSGALP00000007035	Secretory carrier membrane protein 1	SCAMP1	5422100	0	0	0	0	0	0	0	0	0	0	0	0	0							0						280410	180220	224180	1638300	1718200	1380700	0.000197297	0.000115965	0.000111682	0.000315927	0.000344724	0.00026851	1000
1559	ENSGALP00000036511	TAPT1	ENSGALP00000036511	1559	1559	25066	ENSGALP00000007047	RAB27A, member RAS oncogene family (RAB27A	RAB27A	119330	0	0	0	0	0	0	0	0	0	0	0	0	0							0						0	0	37657	81671	0	0			1.876e-05	1.57493e-05			1000
1496	ENSGALP00000033359	FSCN1	ENSGALP00000033359	1496	1496	52637	ENSGALP00000007102	Regulator of microtubule dynamics 3	RMDN3	107360	0	0	0	0	0	0	0	0	0	0	0	0	0							0						0	0	0	43822	0	63538				8.45057e-06		1.23565e-05	1000
529	ENSGALP00000009030	GBF1	ENSGALP00000009030	529	529	66168	ENSGALP00000007138	Family with sequence similarity 73, member B	FAM73B	27991	0	0	0	0	0	0	0	0	0	0	0	0	0							0						0	0	0	0	27991	0					5.61586e-06		1000
1811	ENSGALP00000043246	LYPLA1	ENSGALP00000043246	1811	1811	86009	ENSGALP00000007187	Mitofusin 2	MFN2	162070	0	0	0	0	0	0	0	0	0	0	0	0	0							0						0	7062.2	12507	67306	38473	36718		4.54426e-06	6.23074e-06	1.29792e-05	7.71887e-06	7.1407e-06	1000
303	ENSGALP00000005156	VAMP4	ENSGALP00000005156	303	303	84343	ENSGALP00000007204	Procollagen-lysine, 2-oxoglutarate 5-dioxygenase 1	PLOD1	1207400	0	0	0	0	0	0	0	0	0	0	0	0	0							0						56629	123940	127810	258580	296370	344130	3.98443e-05	7.97507e-05	6.36725e-05	4.98642e-05	5.9461e-05	6.69244e-05	1000
1175	ENSGALP00000021877	ATP13A1	ENSGALP00000021877	1175	1175	63393	ENSGALP00000007206	KIAA2013	KIAA2013	732900	0	0	0	0	0	0	0	0	0	0	0	0	0							0						72074	41134	61761	197490	183830	176610	5.07114e-05	2.64682e-05	3.07681e-05	3.80837e-05	3.6882e-05	3.43461e-05	1000
1398	ENSGALP00000026809	ARSE	ENSGALP00000026809	1398	1398	62311	ENSGALP00000007235	Sphingosine-1-phosphate lyase 1	SGPL1	1829300	0	0	0	0	0	0	0	0	0	0	0	0	0							0						18387	28860	33511	556280	604420	587790	1.29371e-05	1.85703e-05	1.66945e-05	0.000107272	0.000121265	0.00011431	1000
900	ENSGALP00000015953	TMEM206	ENSGALP00000015953	900	900	82747	ENSGALP00000007244	Dpy-19-like 3	DPY19L3	242960	0	0	0	0	0	0	0	0	0	0	0	0	0							0						20915	0	0	68741	83734	69570	1.47158e-05			1.32559e-05	1.67996e-05	1.35296e-05	1000
131	ENSGALP00000002025	ST14	ENSGALP00000002025	131	131	27613	ENSGALP00000007248	Hydrogen voltage-gated channel 1 (HVCN1	HVCN1	96231	0	0	0	0	0	0	0	0	0	0	0	0	0							0						11652	0	0	0	84579	0	8.19837e-06				1.69692e-05		1000
289	ENSGALP00000004745	NUP93	ENSGALP00000004745	289	289	94364	ENSGALP00000007267	Leucine rich repeat containing 8 family, member A	LRRC8A	223450	0	0	0	0	0	0	0	0	0	0	0	0	0							0						15705	0	12674	64925	60818	69332	1.10501e-05		6.31394e-06	1.252e-05	1.2202e-05	1.34833e-05	1000
1827	REV__ENSGALP00000005141	REV__ENSGALP00000005141	REV__ENSGALP00000005141	1827	1827	16273	ENSGALP00000007287	Ribosomal protein S14	RPS14	22410000	0	0	0	0	0	0	0	0	0	0	0	0	0							0						2377200	4013500	2610200	4836000	4190100	4382500	0.0016726	0.00258253	0.00130035	0.000932567	0.000840663	0.000852283	1000
1445	ENSGALP00000028073	ARL6IP5	ENSGALP00000028073	1445	1445	21637	ENSGALP00000007317	Heme binding protein 2	HEBP2	16458000	0	0	0	0	0	0	0	0	0	0	0	0	0							0						1354300	568580	1728700	3344400	4665100	4796500	0.000952888	0.00036586	0.000861205	0.000644929	0.000935963	0.000932795	1000
376	ENSGALP00000006300;ENSGALP00000042285	AP1M1;AP1M2	ENSGALP00000006300	376	376	39056	ENSGALP00000007379_family	Family {Guanine nucleotide binding protein (G protein), alpha inhibiting activity polypeptide 2}	GNAI2;GNAI1;GNAI3;GNAL;GNAT1;GNAT2;GNAT3	27966600	15299	0	0	0	2159300	1758700	3	0	32198	0	65363	39366	52483		0.00119078		0.0027654	0.000907917	0.00191716	4	0.00169531	0.00083043	0.000339022			1453590	1356610	2583040	6190300	6318600	5941850	0.00102275	0.000872927	0.00128682	0.00119373	0.00126771	0.00115554	1000
141;912	ENSGALP00000002236;ENSGALP00000016120	RAP1B;RAP1A	ENSGALP00000016120;ENSGALP00000002236	141;912	141;912	32103	ENSGALP00000007476	SET nuclear oncogene	SET	3688400	0	0	0	0	0	0	0	0	0	0	0	0	0							0						0	0	0	1164100	1275300	1249000				0.000224483	0.000255865	0.000242898	1000
1800	ENSGALP00000043047	CLDN1	ENSGALP00000043047	1800	1800	68556	ENSGALP00000007490_family	Family {Moesin}	MSN;RDX	2050370	0	0	0	0	0	0	0	0	0	0	0	0	0							0						127760	72645	137518	550780	632470	529220	8.98921e-05	4.67443e-05	6.85088e-05	0.000106212	0.000126893	0.00010292	1000
427	ENSGALP00000007187	MFN2	ENSGALP00000007187	427	427	39365	ENSGALP00000007492	Tropomodulin 3 (ubiquitous)	TMOD3	157810	0	0	0	0	0	0	0	0	0	0	0	0	0							0						0	11342	0	33873	0	112600		7.29814e-06		6.53202e-06		2.18978e-05	1000
161	ENSGALP00000002514	DERL2	ENSGALP00000002514	161	161	83864	ENSGALP00000007493	Pentatricopeptide repeat domain 1	PTCD1	3492900	0	0	0	0	0	0	0	0	0	0	0	0	0							0						66909	38733	59228	1183600	1028000	1116400	4.70773e-05	2.49232e-05	2.95062e-05	0.000228244	0.000206249	0.000217111	1000
140	ENSGALP00000002234	RAB14	ENSGALP00000002234	140	140	57375	ENSGALP00000007511	Aldehyde dehydrogenase 2, mitochondrial	ALDH2	7637900	0	0	0	0	0	0	0	0	0	0	0	0	0							0						759560	439820	923700	1749700	1788600	1976500	0.000534428	0.000283007	0.000460169	0.00033741	0.000358848	0.000384378	1000
1187	ENSGALP00000022251	TIMM21	ENSGALP00000022251	1187	1187	55981	ENSGALP00000007520	Solute carrier family 7 (neutral amino acid transporter light chain, asc system), member 10	SLC7A10	31716	0	0	0	0	0	0	0	0	0	0	0	0	0							0						31716	0	0	0	0	0	2.23154e-05						1000
1328	ENSGALP00000025208	HSDL2	ENSGALP00000025208	1328	1328	71664	ENSGALP00000007531	Staufen double-stranded RNA binding protein 1	STAU1	267020	0	0	0	0	0	0	0	0	0	0	0	0	0							0						0	0	0	82001	53033	131980				1.58129e-05	1.06401e-05	2.56667e-05	1000
1383	ENSGALP00000026381	DERL1	ENSGALP00000026381	1383	1383	21548	ENSGALP00000007558	Transmembrane protein 11	TMEM11	1258200	0	0	0	0	0	0	0	0	0	0	0	0	0							0						0	0	319510	193580	0	745110			0.000159174	3.73297e-05		0.000144905	1000
1664	ENSGALP00000040466	UGGT1	ENSGALP00000040466	1416;1664	1664	34734	ENSGALP00000007580	Dehydrogenase/reductase (SDR family) member 7B	DHRS7B	2589100	0	0	0	0	0	0	0	0	0	0	0	0	0							0						67314	64196	92465	969150	443320	952660	4.73622e-05	4.13077e-05	4.60643e-05	0.000186889	8.89437e-05	0.000185268	1000
164	ENSGALP00000002523	SPCS1	ENSGALP00000002523	164	164	54092	ENSGALP00000007586	Aldehyde dehydrogenase 3 family, member A1	ALDH3A1	7316400	0	0	0	0	0	0	0	0	0	0	0	0	0							0						459200	225860	533320	2019400	1904100	2174500	0.000323094	0.000145332	0.00026569	0.000389418	0.000382021	0.000422884	1000
1414	ENSGALP00000040815;ENSGALP00000027234	FARP1	ENSGALP00000027234;ENSGALP00000040815	1414	1414	57503	ENSGALP00000007593	Prosaposin	PSAP	93757	0	0	0	0	0	0	0	0	0	0	0	0	0							0						0	0	0	35705	27853	30200				6.8853e-06	5.58817e-06	5.87312e-06	1000
1706	ENSGALP00000041423	GPX1	ENSGALP00000041423	1706	1706	40964	ENSGALP00000007619	Prostaglandin E synthase 2	PTGES2	1155000	0	0	0	0	0	0	0	0	0	0	0	0	0							0						16240	10915	32980	435040	401470	258360	1.14265e-05	7.02339e-06	1.643e-05	8.38925e-05	8.05473e-05	5.02443e-05	1000
1511	ENSGALP00000034251	STOM	ENSGALP00000034251	1511	1511	40244	ENSGALP00000007639	H2A histone family, member Y2	H2AFY2	20719000	0	0	0	0	0	0	0	0	0	0	7795.6	0	0				0.000329819			1	0.000329819			0.00268151	#VALUE!	1359600	925330	1757800	5858800	5361000	5448900	0.000956617	0.000595415	0.000875702	0.0011298	0.00107558	0.00105967	1000	0.00268151
81	ENSGALP00000000954	MYO1D	ENSGALP00000000954	81	81	254530	ENSGALP00000007644	Myosin phosphatase Rho interacting protein	MPRIP	38530	0	0	0	0	0	0	0	5927.2	0	0	1274.8	3198.6	0	8.00489e-05			5.39346e-05	7.37708e-05		3	6.92515e-05	1.36311e-05	5.56489e-06	0.000563033	8.8793e-05	0	0	0	21209	6920.6	0				4.08991e-06	1.38849e-06		1000	0.00327733
1040	ENSGALP00000018821	QKI	ENSGALP00000018821	1040	1040	90724	ENSGALP00000007671	Family with sequence similarity 129, member A	FAM129A	108110	0	0	0	0	0	0	0	0	0	0	0	0	0							0						39598	31825	3923.3	10144	10829	11795	2.78612e-05	2.04782e-05	1.95451e-06	1.95615e-06	2.17263e-06	2.29382e-06	1000
221	ENSGALP00000042290;ENSGALP00000040958;ENSGALP00000040771;ENSGALP00000040613;ENSGALP00000031320;ENSGALP00000003584	H3F3C;H3-I;H3-IX	ENSGALP00000003584;ENSGALP00000031320;ENSGALP00000040613;ENSGALP00000040771;ENSGALP00000040958;ENSGALP00000042290	221	221	29463	ENSGALP00000007705	Ribosomal protein S4, X-linked	RPS4X	9018500	0	0	0	0	0	0	0	0	0	112380	0	19428	16754			0.00113861		0.000448077	0.00061201	3	0.000732899	0.00036079	0.000147292	0.00595866	0.00181456	828470	841370	762550	1994500	2390600	2052400	0.000582913	0.00054139	0.000379888	0.000384616	0.000479628	0.000399139	1000	0.00595866
1045	ENSGALP00000018925	SLC4A4	ENSGALP00000018925	1045	1045	81675	ENSGALP00000007707	Leucine proline-enriched proteoglycan (leprecan) 1	LEPRE1	576890	0	0	0	14945	0	0	1	0	0	0	0	0	0							0						125630	97044	123730	57059	103310	55181	8.83935e-05	6.24441e-05	6.16399e-05	1.10032e-05	2.07272e-05	1.07313e-05	1000
871	ENSGALP00000041620;ENSGALP00000015413	PDCD10	ENSGALP00000015413;ENSGALP00000041620	871	871	10271	ENSGALP00000007724	Translocase of inner mitochondrial membrane 10 homolog	TIMM10	558450	0	0	0	0	0	0	0	0	0	0	0	0	0							0						0	0	0	162710	0	395740				3.13768e-05		7.69612e-05	1000
527;1606	ENSGALP00000009007;ENSGALP00000038376	ARF1;ARF4	ENSGALP00000038376;ENSGALP00000009007	527;1606	527;1606	31106	ENSGALP00000007728	Y box binding protein 1	YBX1	4648000	0	0	0	0	0	0	0	0	0	0	0	0	0							0						516430	443500	348660	1262300	1109800	967270	0.000363361	0.000285375	0.000173696	0.00024342	0.00022266	0.000188109	1000
1586	ENSGALP00000037723	SLC6A9	ENSGALP00000037723	1586	1586	57479	ENSGALP00000007743	Nucleoporin 62kDa	NUP62	138060	0	0	0	0	0	0	0	0	0	0	0	0	0							0						0	0	0	99316	38740	0				1.91519e-05	7.77244e-06		1000
1643	ENSGALP00000039623	RER1	ENSGALP00000039623	1643	1643	15643	ENSGALP00000007763	Ribosomal protein S24	RPS24	3971600	0	0	0	0	0	0	0	0	0	0	0	0	0							0						179370	126930	202030	1074000	1283100	1106200	0.000126205	8.16746e-05	0.000100647	0.000207109	0.000257429	0.000215127	1000
577	ENSGALP00000010009	OTOG	ENSGALP00000010009	577	577	117110	ENSGALP00000007779	Golgin A2	GOLGA2	321010	0	0	0	0	0	0	0	0	0	0	0	0	0							0						7694.8	0	0	94417	174240	44659	5.41407e-06			1.82072e-05	3.49579e-05	8.68502e-06	1000
1799	ENSGALP00000043043	SLC25A20	ENSGALP00000043043	1799	1799	53753	ENSGALP00000007795	Solute carrier family 2 (facilitated glucose transporter), member 1	SLC2A1	2900700	0	0	0	0	0	0	0	0	0	0	0	0	0							0						138170	123340	221720	801020	774370	842090	9.72166e-05	7.93646e-05	0.000110457	0.000154467	0.000155363	0.000163765	1000
1253	ENSGALP00000023850;ENSGALP00000023849;ENSGALP00000000062	ATP6V1A;NOVEL	ENSGALP00000023849;ENSGALP00000023850	1253	1253	55806	ENSGALP00000007825	Target of myb1-like 2	TOM1L2	541660	0	0	0	0	0	0	0	0	0	0	0	0	0							0						23318	0	48068	173960	198570	97743	1.64066e-05		2.39465e-05	3.35462e-05	3.98393e-05	1.90085e-05	1000
415	ENSGALP00000006962	MICU1	ENSGALP00000006962	415	415	30755	ENSGALP00000007867	Coenzyme Q4	COQ4	158700	0	0	0	0	0	0	0	0	0	0	0	0	0							0						0	0	0	0	80835	77863					1.6218e-05	1.51423e-05	1000
512	ENSGALP00000008781	RAC3	ENSGALP00000008781	512;1512	512	62130	ENSGALP00000007934	Glucose-6-phosphate isomerase	GPI	200490	0	0	0	0	0	0	0	0	0	0	0	0	0							0						0	0	0	15516	136920	48047				2.99208e-06	2.74704e-05	9.3439e-06	1000
909	ENSGALP00000016081	PRKD1	ENSGALP00000016081	909	909	301350	ENSGALP00000007941	Fibrillin 1	FBN1	18914	0	0	0	0	0	0	0	0	0	0	0	0	0							0						6811.2	0	7710.6	0	0	4392.4	4.79237e-06		3.84127e-06			8.54208e-07	1000
975	ENSGALP00000017462	HMGB2	ENSGALP00000017462	975	975	12239	ENSGALP00000007945	Translocase of inner mitochondrial membrane 8 homolog A	TIMM8A	353220	0	0	0	0	0	0	0	0	0	0	0	0	0							0						0	0	0	0	353220	0					7.08668e-05		1000
1093	ENSGALP00000019994	UBXN4	ENSGALP00000019994	1093	1093	72617	ENSGALP00000007948	Solute carrier family 27 (fatty acid transporter), member 4	SLC27A4	4047700	0	0	0	0	0	0	0	0	0	0	0	0	0							0						152170	30049	202360	1191200	1243500	1228500	0.000107067	1.93354e-05	0.000100812	0.000229709	0.000249484	0.000238912	1000
941	ENSGALP00000016629	PRDX1	ENSGALP00000016629	941;1381	941	363710	ENSGALP00000007959	Myosin XVA	MYO15A	9752.1	0	0	0	0	0	0	0	1053.6	0	6856.4	1842.1	0	0	1.42292e-05		6.94676e-05	7.79361e-05			3	5.38776e-05	3.45966e-05	1.4124e-05	0.00043804	0.000169313	0	0	0	0	0	0							1000	0.00043804
213	ENSGALP00000003376	ACOX1	ENSGALP00000003376	213	213	29541	ENSGALP00000007995	Catechol-O-methyltransferase domain containing 1	COMTD1	341860	0	0	0	0	0	0	0	0	0	0	0	0	0							0						45773	0	59973	103790	132330	0	3.2206e-05		2.98774e-05	2.00147e-05	2.65495e-05		1000
635	ENSGALP00000011015	TNMD	ENSGALP00000011015	635	635	30197	ENSGALP00000007997	Voltage-dependent anion channel 2	VDAC2	283440000	0	0	0	0	0	0	0	0	0	41237	13676	0	16654			0.000417805	0.000578608		0.000608357	3	0.000534923	0.000102513	4.18506e-05	0.00434907	0.000676529	19064000	15920000	21501000	74576000	74939000	77367000	0.0134135	0.0102439	0.0107114	0.0143811	0.0150351	0.0150459	1000	0.00434907
780	ENSGALP00000013700	SEC13	ENSGALP00000013700	780	780	105120	ENSGALP00000008047	Dystrophin related protein 2	DRP2	318630	0	0	0	0	0	0	0	0	0	0	0	0	0							0						26881	0	22156	91525	81811	96263	1.89135e-05		1.10377e-05	1.76495e-05	1.64138e-05	1.87207e-05	1000
581	ENSGALP00000010113	NONE	ENSGALP00000010113	581	581	67803	ENSGALP00000008056	Acyl-CoA dehydrogenase family, member 9	ACAD9	2528700	0	0	0	0	0	0	0	0	0	0	0	0	0							0						213100	242490	297100	575270	665160	535530	0.000149938	0.000156033	0.000148009	0.000110934	0.000133452	0.000104147	1000
123	ENSGALP00000001882	SLC25A1	ENSGALP00000001882	123	123	18469	ENSGALP00000008066	Transmembrane protein 35	TMEM35	1216100	0	0	0	0	0	0	0	0	0	0	0	0	0							0						0	0	0	623270	466620	126250				0.00012019	9.36184e-05	2.45524e-05	1000
199	ENSGALP00000003152	AHCY	ENSGALP00000003152	199	199	143780	ENSGALP00000008067	IQ motif and Sec7 domain 1	IQSEC1	10925	0	0	0	0	0	0	0	0	0	0	0	0	0							0						0	0	0	10925	0	0				2.10676e-06			1000
746	ENSGALP00000013036	CORO2B	ENSGALP00000013036	746	746	110580	ENSGALP00000008082	SWI/SNF related, matrix associated, actin dependent regulator of chromatin, subfamily c, member 1	SMARCC1	140000	0	0	0	0	0	0	0	0	0	0	0	0	0							0						0	0	0	0	62858	77141					1.26113e-05	1.50019e-05	1000
1345	ENSGALP00000025600	DECR1	ENSGALP00000025600	1345	1345	58150	ENSGALP00000008091	Dyskeratosis congenita 1, dyskerin	DKC1	1486600	0	0	0	0	0	0	0	0	0	0	0	0	0							0						0	19424	49575	489350	420810	507430		1.24986e-05	2.46973e-05	9.43655e-05	8.44275e-05	9.8682e-05	1000
729	ENSGALP00000012817	LAMB1	ENSGALP00000012817	729	729	46996	ENSGALP00000008112	Adaptor-related protein complex 3, mu 1 subunit	AP3M1	446170	0	0	0	0	0	0	0	0	0	0	0	0	0							0						0	16270	0	143770	159970	126160		1.04691e-05		2.77244e-05	3.20949e-05	2.45349e-05	1000
1385	ENSGALP00000026395	CALB1	ENSGALP00000026395	1385	1385	195540	ENSGALP00000008128	Nucleoporin 210kDa	NUP210	1549300	0	0	0	0	0	0	0	0	0	0	0	0	0							0						46157	35089	42293	479320	515900	430580	3.24761e-05	2.25784e-05	2.10695e-05	9.24313e-05	0.000103505	8.37367e-05	1000
1292	ENSGALP00000024696	TRMT10C	ENSGALP00000024696	1292	1292	114420	ENSGALP00000008131	Vinculin	VCL	61468	0	0	0	0	0	0	0	0	0	0	0	0	0							0						12334	4875.6	0	16739	11115	16405	8.67822e-06	3.13726e-06		3.22792e-06	2.23001e-06	3.19035e-06	1000
1107	ENSGALP00000020349	PRPF39	ENSGALP00000020349	1107	1107	49911	ENSGALP00000008132	Chromosome 1 open reading frame 27	C1ORF27	175340	0	0	0	0	0	0	0	0	0	0	0	0	0							0						0	0	13403	82343	32845	46749			6.67711e-06	1.58789e-05	6.58972e-06	9.09147e-06	1000
1082	ENSGALP00000019634	PDCD6IP	ENSGALP00000019634	1082	1082	39905	ENSGALP00000008151	Histone deacetylase 11 (HDAC11	HDAC11	73822	0	0	0	0	0	0	0	0	0	0	0	0	0							0						0	0	0	46795	27027	0				9.02388e-06	5.42245e-06		1000
597	ENSGALP00000016689;ENSGALP00000010423	PPP2CA;PPP2CB	ENSGALP00000010423;ENSGALP00000016689	597	597	55675	ENSGALP00000008158	Solute carrier family 25 (mitochondrial carrier; phosphate carrier), member 25	SLC25A25	219190	0	0	0	0	0	0	0	0	0	0	0	0	0							0						8713	0	0	83686	62874	63912	6.13048e-06			1.61379e-05	1.26145e-05	1.24292e-05	1000
1261	ENSGALP00000023990	GOPC	ENSGALP00000023990	1261	1261	95501	ENSGALP00000008166	Cadherin 4, type 1, R-cadherin (retinal)	CDH4	90476	0	0	0	0	0	0	0	0	0	0	0	0	0							0						0	0	0	58500	31976	0				1.12811e-05	6.41537e-06		1000
502	ENSGALP00000008475	CYB5R2	ENSGALP00000008475	502	502	36173	ENSGALP00000008167	Glycerophosphodiester phosphodiesterase domain containing 1	GDPD1	1998200	0	0	0	0	0	0	0	0	0	0	0	0	0							0						0	45950	52873	740320	570990	588100		2.95671e-05	2.63403e-05	0.000142762	0.000114558	0.00011437	1000
322	ENSGALP00000042834;ENSGALP00000040985;ENSGALP00000021306;ENSGALP00000005480;ENSGALP00000021315	AKR1B1;AKR1B1L;AKR1E2;NONE	ENSGALP00000005480;ENSGALP00000021306;ENSGALP00000040985;ENSGALP00000042834	322	322	243590	ENSGALP00000008171	Translocated promoter region, nuclear basket protein	TPR	185580	0	0	0	0	0	0	0	0	0	0	0	0	0							0						0	0	0	44778	60609	80190				8.63492e-06	1.216e-05	1.55949e-05	1000
1544	ENSGALP00000035905	CDC5L	ENSGALP00000035905	1544	1544	190030	ENSGALP00000008236_family	Family {Clathrin, heavy chain (Hc)}	CLTC;CLTCL1	2.68384e+06	5914.9	0	0	0	0	0	1	6842.9	0	24781	2612.2	0	2264.5	9.24158e-05		0.000251076	0.000110518		8.27203e-05	4	0.000134182	7.87758e-05	3.21601e-05			242180	144990	366812	599020	731323	557060	0.000170398	9.32955e-05	0.000182738	0.000115514	0.000146726	0.000108334	1000
1615	ENSGALP00000038677	PGAM1	ENSGALP00000038677	1615	1615	18929	ENSGALP00000008254	Peptidyl-tRNA hydrolase 2	PTRH2	3658900	0	0	0	0	0	0	0	0	0	0	0	0	0							0						311730	74599	237920	1073400	1190900	770350	0.000219334	4.80016e-05	0.000118527	0.000206993	0.000238931	0.000149813	1000
1411	ENSGALP00000027206	TMTC4	ENSGALP00000027206	1411	1411	46450	ENSGALP00000008268	WD repeat and FYVE domain containing 1	WDFY1	336880	0	0	0	0	0	0	0	0	0	0	0	0	0							0						0	0	0	177880	47196	111800				3.43021e-05	9.46897e-06	2.17422e-05	1000
1265	ENSGALP00000024075	ZNF518B	ENSGALP00000024075	1265	1265	46359	ENSGALP00000008272	Vacuole membrane protein 1	VMP1	769220	0	0	0	0	0	0	0	0	0	0	0	0	0							0						0	0	0	245730	245880	277610				4.73862e-05	4.93311e-05	5.3988e-05	1000
1220	ENSGALP00000023091	NDUFV2	ENSGALP00000023091	1220	1220	33126	ENSGALP00000008279	Mitochondrial carrier 2	MTCH2	13491000	0	0	0	0	0	0	0	0	0	0	0	0	0							0						643730	224830	1062700	3489300	4243200	3827500	0.000452929	0.00014467	0.000529416	0.000672871	0.000851317	0.00074435	1000
1237	ENSGALP00000023352;ENSGALP00000042954	MYH10;MYH11B	ENSGALP00000023352	1113;1237	1237	122470	ENSGALP00000008299	Family with sequence similarity 120A	FAM120A	3532400	0	0	0	0	0	0	0	0	3426.8	12932	0	0	0		0.000126734	0.000131024				2	0.000128879	3.03396e-06	1.23861e-06	0.00104782	0.000141402	431660	348630	584700	726330	778700	646000	0.000303717	0.00022433	0.000291286	0.000140064	0.000156231	0.00012563	1000	0.00104782
898	ENSGALP00000015897	GOLGB1	ENSGALP00000015897	898	898	165790	ENSGALP00000008307	Collagen, type XI, alpha 1	COL11A1	16214	0	0	0	0	0	0	0	0	0	0	0	0	0							0						0	5319.3	0	4733.8	0	6161		3.42277e-06		9.12859e-07		1.19816e-06	1000
1280	ENSGALP00000024387	DSG2	ENSGALP00000024387	1280	1280	121680	ENSGALP00000008311	SEC24 family, member C	SEC24C	45298	0	0	0	0	0	0	0	0	0	0	0	0	0							0						0	0	0	30289	15009	0				5.84089e-06	3.01127e-06		1000
837	ENSGALP00000014768	EHD3	ENSGALP00000014768	837	837	127130	ENSGALP00000008338	Damage-specific DNA binding protein 1, 127kDa	DDB1	792590	0	0	0	0	0	0	0	0	0	0	0	0	0							0						44843	21604	56826	190970	230470	247880	3.15516e-05	1.39014e-05	2.83096e-05	3.68264e-05	4.62394e-05	4.82063e-05	1000
166	ENSGALP00000002625	ATP6V1B2	ENSGALP00000002625	166	166	79883	ENSGALP00000008346	Acyl-CoA synthetase long-chain family member 3	ACSL3	1035000	0	0	0	0	0	0	0	0	0	0	0	0	0							0						43787	0	44299	400410	221420	325080	3.08086e-05		2.20689e-05	7.72145e-05	4.44237e-05	6.32197e-05	1000
476	ENSGALP00000008082	SMARCC1	ENSGALP00000008082	476	476	246090	ENSGALP00000008367	Calcium channel, voltage-dependent, T type, alpha 1H subunit	CACNA1H	182570	0	0	0	0	0	0	0	0	0	0	0	0	0							0						18775	0	17276	50359	63610	32548	1.32101e-05		8.60657e-06	9.71115e-06	1.27621e-05	6.32975e-06	1000
452	ENSGALP00000007671	FAM129A	ENSGALP00000007671	452	452	87329	ENSGALP00000008451	Cadherin 11, type 2, OB-cadherin (osteoblast)	CDH11	140540	0	0	0	0	0	0	0	0	0	0	0	0	0							0						0	16544	0	27175	25824	70995		1.06454e-05		5.24039e-06	5.18109e-06	1.38067e-05	1000
524	ENSGALP00000008931	ATP2C2	ENSGALP00000008931	524	524	54097	ENSGALP00000008453	Dihydrolipoamide branched chain transacylase E2	DBT	140790	0	0	47455	19359	37478	0	3	0	0	0	0	0	0							0						6194.7	0	0	17692	0	12607	4.3586e-06			3.4117e-06		2.45174e-06	1000
961	ENSGALP00000017201	SEL1L	ENSGALP00000017201	961	961	57713	ENSGALP00000008454	Lipase maturation factor 1	LMF1	1663200	0	0	0	0	0	0	0	0	0	0	0	0	0							0						93085	83569	107320	412030	556130	411060	6.54948e-05	5.37735e-05	5.34647e-05	7.94552e-05	0.000111577	7.99405e-05	1000
273	ENSGALP00000004476	RCN2	ENSGALP00000004476	273	273	33669	ENSGALP00000008475	Cytochrome b5 reductase 2	CYB5R2	2033800	0	0	0	0	0	0	0	0	0	0	0	0	0							0						69308	0	22632	694630	537830	709390	4.87652e-05		1.12748e-05	0.000133951	0.000107905	0.000137958	1000
724	ENSGALP00000012744	MAGT1	ENSGALP00000012744	724	724	57773	ENSGALP00000008480	Hedgehog acyltransferase-like	HHATL	1506900	0	0	0	0	0	0	0	0	0	0	0	0	0							0						0	0	0	431650	540110	535100				8.32387e-05	0.000108363	0.000104063	1000
1034	ENSGALP00000018742	CKB	ENSGALP00000018742	1034	1034	49333	ENSGALP00000008485	Annexin A7	ANXA7	12349000	0	0	0	0	0	0	0	0	0	0	0	0	0							0						767690	652810	791150	3215500	3673600	3248600	0.000540148	0.000420058	0.000394136	0.000620072	0.000737038	0.000631769	1000
840	ENSGALP00000014878	FKBP7	ENSGALP00000014878	840	840	68453	ENSGALP00000008498	Transketolase	TKT	109050	64548	0	0	0	0	0	1	0	0	0	0	0	0							0						0	0	14616	0	29890	0			7.28141e-06		5.99686e-06		1000
854	ENSGALP00000015128	LBR	ENSGALP00000015128	854	854	35257	ENSGALP00000008530	Eukaryotic translation initiation factor 3, subunit F	EIF3F	2312700	0	0	0	0	0	0	0	0	0	0	0	0	0							0						148630	80792	113860	728380	499680	741380	0.000104576	5.19866e-05	5.67228e-05	0.00014046	0.000100251	0.000144179	1000
1166;1167	ENSGALP00000021742;ENSGALP00000021743;ENSGALP00000037260;ENSGALP00000037324;ENSGALP00000042437;ENSGALP00000042501	H2B-I;H2BFM;HIST1H2BB	ENSGALP00000021742;ENSGALP00000037260;ENSGALP00000037324;ENSGALP00000042437;ENSGALP00000042501;ENSGALP00000021743	1166;1167	1166;1167	103140	ENSGALP00000008578	Coatomer protein complex, subunit beta 2 (beta prime)	COPB2	5094700	0	0	0	0	0	0	0	0	0	6676	0	0	0			6.76398e-05				1	6.76398e-05			0.00054993	#VALUE!	449400	248880	475360	1249200	1389000	1276300	0.000316199	0.000160145	0.000236815	0.000240894	0.000278676	0.000248207	1000	0.00054993
431	ENSGALP00000007244	DPY19L3	ENSGALP00000007244	431	431	38809	ENSGALP00000008604	Mitochondrial ribosomal protein S22	MRPS22	261460	0	0	0	0	0	0	0	0	0	0	0	0	0							0						24123	0	0	65613	89151	82568	1.6973e-05			1.26527e-05	1.78864e-05	1.60573e-05	1000
990	ENSGALP00000017869	NID1	ENSGALP00000017869	990;1103	990	10158	ENSGALP00000008645	Selenoprotein K (SELK	SELK	1116900	0	0	0	0	0	0	0	0	0	0	0	0	0							0						0	125580	178270	274850	270170	268000		8.08059e-05	8.88106e-05	5.30017e-05	5.42044e-05	5.21191e-05	1000
1498	ENSGALP00000033465	TXNDC15	ENSGALP00000033465	1498	1498	10719	ENSGALP00000008663	Dynein, light chain, roadblock-type 2	DYNLRB2	767820	0	0	0	0	0	0	0	0	0	0	0	0	0							0						0	0	41216	243260	239580	243750			2.0533e-05	4.69099e-05	4.80671e-05	4.74031e-05	1000
730	ENSGALP00000012854	ATP5H	ENSGALP00000012854	730	730	20497	ENSGALP00000008764	NADH dehydrogenase (ubiquinone) 1 beta subcomplex, 10, 22kDa	NDUFB10	18318000	0	0	0	0	0	0	0	0	0	0	0	0	0							0						1350400	3228500	2872200	3627500	3604200	3635100	0.000950144	0.00207742	0.00143087	0.000699522	0.000723114	0.000706933	1000
298	ENSGALP00000005047	SURF1	ENSGALP00000005047	298	298	21280	ENSGALP00000008781	Ras-related C3 botulinum toxin substrate 3 (rho family, small GTP binding protein Rac3)	RAC3	184460	0	0	0	0	0	0	0	0	0	0	0	0	0							0						57311	0	0	0	127150	0	4.03241e-05				2.55102e-05		1000
716	ENSGALP00000012615	ABCB7	ENSGALP00000012615	716	716	78726	ENSGALP00000008794	Cadherin 13, H-cadherin (heart) (CDH13	CDH13	127800	0	0	0	0	0	0	0	0	0	0	0	0	0							0						0	0	0	34897	40930	51971				6.72948e-06	8.21182e-06	1.0107e-05	1000
805	ENSGALP00000014097	DSTN	ENSGALP00000014097	805	805	30673	ENSGALP00000008802	Ribosomal protein S2	RPS2	4185200	0	0	0	0	0	0	0	0	0	0	0	0	0							0						128920	108570	139490	1407200	1642500	758610	9.07083e-05	6.98607e-05	6.94912e-05	0.000271362	0.000329536	0.00014753	1000
755	ENSGALP00000013151	MEST	ENSGALP00000013151	755	755	54067	ENSGALP00000008824	Non-POU domain containing, octamer-binding	NONO	37158	0	0	0	0	0	0	0	0	0	0	0	0	0							0						0	11008	0	0	0	26150		7.08323e-06				5.0855e-06	1000
666	ENSGALP00000011559	ITGB1	ENSGALP00000011559	666	666	12393	ENSGALP00000008830	Uncharacterized protein	RP11-599B13.6	3675500	0	0	0	0	0	0	0	0	0	0	0	0	0							0						270060	0	348950	996040	1114500	945920	0.000190015		0.00017384	0.000192075	0.000223603	0.000183957	1000
299	ENSGALP00000005115	GNA11	ENSGALP00000005115	299;1283	299	10598	ENSGALP00000008845_family	Family {Dynein, light chain, LC8-type 2}	DYNLL2;DYNLL1	2920050	0	0	0	0	0	0	0	0	0	0	0	0	0							0						173580	119200	291200	894680	1284520	156920	0.000122131	7.67007e-05	0.00014507	0.000172529	0.000257714	3.05169e-05	1000
1104	ENSGALP00000020268	PDIA4	ENSGALP00000020268	1104	1104	68231	ENSGALP00000008863	Transmembrane 9 superfamily member 3	TM9SF3	11242000	0	0	0	0	0	0	0	0	0	0	0	0	0							0						471190	477170	803100	3354100	3772300	2363800	0.00033153	0.000307041	0.000400089	0.0006468	0.00075684	0.000459698	1000
1502	ENSGALP00000033837	DCTN3	ENSGALP00000033837	1502	1502	100970	ENSGALP00000008866	Treacher Collins-Franceschetti syndrome 1	TCOF1	226490	0	0	0	0	0	0	0	0	0	0	0	0	0							0						0	0	0	136830	89663	0				2.63861e-05	1.79892e-05		1000
978	ENSGALP00000017568	PPAP2B	ENSGALP00000017568	978	978	47378	ENSGALP00000008889	ST6 beta-galactosamide alpha-2,6-sialyltranferase 1 (ST6GAL1	ST6GAL1	425990	0	0	0	0	0	0	0	0	0	0	0	0	0							0						0	0	0	0	425990	0					8.54667e-05		1000
88	ENSGALP00000001091	CAPN5	ENSGALP00000001091	88	88	22300	ENSGALP00000008908	Mitochondrial ribosomal protein S23	MRPS23	1036800	0	0	0	0	0	0	0	0	0	0	0	0	0							0						33658	36192	0	223820	419700	323390	2.36818e-05	2.32882e-05		4.31611e-05	8.42048e-05	6.2891e-05	1000
1650	ENSGALP00000039908	HEPH	ENSGALP00000039908	1650	1650	31406	ENSGALP00000008922	Holocytochrome c synthase (HCCS	HCCS	366650	0	0	0	0	0	0	0	0	0	0	0	0	0							0						0	0	30489	84101	109640	142420			1.5189e-05	1.62179e-05	2.19972e-05	2.7697e-05	1000
901	ENSGALP00000025727;ENSGALP00000015955	PTPRA	ENSGALP00000015955;ENSGALP00000025727	901	901	103660	ENSGALP00000008931	ATPase, Ca++ transporting, type 2C, member 2	ATP2C2	35620	0	0	0	0	0	0	0	0	0	0	0	0	0							0						0	0	0	0	21593	14027					4.33222e-06	2.72789e-06	1000
205	ENSGALP00000003213	ALG1	ENSGALP00000003213	205	205	25174	ENSGALP00000008955	Synaptogyrin 3	SYNGR3	79390	0	0	0	0	0	0	0	0	0	0	0	0	0							0						0	0	0	0	0	79390						1.54393e-05	1000
839	ENSGALP00000014876	NCSTN	ENSGALP00000014876	839	839	39040	ENSGALP00000008988	Solute carrier family 9, subfamily A (NHE3, cation proton antiporter 3), member 3 regulator 2	SLC9A3R2	2447800	0	0	0	0	0	0	0	0	0	0	0	0	0							0						142060	124840	269940	490430	781660	638920	9.99536e-05	8.03298e-05	0.000134479	9.45738e-05	0.000156825	0.000124253	1000
950	ENSGALP00000016796	MME	ENSGALP00000016796	950	950	42025	ENSGALP00000009013	Tyrosylprotein sulfotransferase 2 (TPST2	TPST2	182850	0	0	0	0	0	0	0	0	0	0	0	0	0							0						0	0	0	61796	65663	55395				1.19166e-05	1.3174e-05	1.07729e-05	1000
1628	ENSGALP00000039013	ATP8B1	ENSGALP00000039013	1628	1628	207870	ENSGALP00000009030	Golgi brefeldin A resistant guanine nucleotide exchange factor 1	GBF1	66849	0	0	0	0	0	0	0	0	0	0	0	0	0							0						0	0	0	8211.8	10007	48630				1.58355e-06	2.00771e-06	9.45728e-06	1000
357	ENSGALP00000005984	TMEM38A	ENSGALP00000005984	357	357	75534	ENSGALP00000009045	ATP-binding cassette, sub-family D (ALD), member 3	ABCD3	238820	0	0	0	0	0	0	0	0	0	0	0	0	0							0						16359	35413	18265	70657	59021	39109	1.15102e-05	2.27869e-05	9.09927e-06	1.36254e-05	1.18414e-05	7.60569e-06	1000
1259	ENSGALP00000023950	GJA1	ENSGALP00000023950	1259	1259	27789	ENSGALP00000009087	Pituitary tumor-transforming 1 interacting protein	PTTG1IP	504270	0	0	0	0	0	0	0	0	0	0	0	0	0							0						0	0	0	0	274410	229860					5.50551e-05	4.47018e-05	1000
770	ENSGALP00000013491	ITPR1	ENSGALP00000013491	295;770	770	40788	ENSGALP00000009207	Stearoyl-CoA desaturase (delta-9-desaturase) (SCD	SCD	148620	0	0	0	0	0	0	0	0	0	0	0	0	0							0						0	0	0	31253	57269	60094				6.02678e-06	1.14899e-05	1.16867e-05	1000
89	ENSGALP00000001183;ENSGALP00000025476	HNRNPR	ENSGALP00000001183;ENSGALP00000025476	89	89	23108	ENSGALP00000009212	ER membrane protein complex subunit 8	EMC8	1751800	0	0	0	0	0	0	0	0	0	0	0	0	0							0						0	52606	0	550700	369780	778750		3.385e-05		0.000106196	7.41893e-05	0.000151447	1000
660	ENSGALP00000011510	APOA1	ENSGALP00000011510	660	660	19631	ENSGALP00000009217	Cytochrome c oxidase subunit IV isoform 1	COX4I1	112330000	0	0	0	0	0	0	0	0	0	0	0	0	0							0						7343000	4971100	11348000	30186000	26011000	32469000	0.00516655	0.00319871	0.00565335	0.00582102	0.00521861	0.00631438	1000
84	ENSGALP00000001024	STX12	ENSGALP00000001024	84	84	97229	ENSGALP00000009244	Advillin	AVIL	1385500	0	0	0	0	0	0	0	3431.6	0	0	0	0	0	4.6345e-05						1	4.6345e-05			0.000376797	#VALUE!	41104	31894	43726	485750	450540	329030	2.89208e-05	2.05226e-05	2.17834e-05	9.36713e-05	9.03922e-05	6.39878e-05	1000	0.000376797
1838	REV__ENSGALP00000022437	REV__ENSGALP00000022437	REV__ENSGALP00000022437	1838	1838	52758	ENSGALP00000009286	Ubiquinol-cytochrome c reductase core protein I	UQCRC1	36934000	0	0	0	0	0	0	0	0	0	0	0	0	0							0						3009300	1431200	3866600	9151400	10671000	8803800	0.00211735	0.000920923	0.00192626	0.00176474	0.00214093	0.00171211	1000
149	ENSGALP00000002352;ENSGALP00000042059	RBM39	ENSGALP00000002352;ENSGALP00000042059	149	149	87250	ENSGALP00000009307	Phospholipase C, delta 1	PLCD1	354230	0	0	0	0	0	0	0	0	0	0	0	0	0							0						16407	0	9792.6	155210	84643	88180	1.1544e-05		4.87848e-06	2.99305e-05	1.6982e-05	1.71487e-05	1000
1509	ENSGALP00000034118	NEO1	ENSGALP00000034118	1509	1509	141600	ENSGALP00000009341	High density lipoprotein binding protein	HDLBP	141040	0	0	0	0	0	0	0	0	0	0	0	0	0							0						6455.4	0	8789.5	48749	37520	39529	4.54203e-06		4.37876e-06	9.40068e-06	7.52767e-06	7.68737e-06	1000
1101	ENSGALP00000036620;ENSGALP00000020165;ENSGALP00000029065;ENSGALP00000039169	EGFR;ERBB2;ERBB4	ENSGALP00000020165;ENSGALP00000029065;ENSGALP00000036620;ENSGALP00000039169	1101	1101	44607	ENSGALP00000009408	Acetyl-CoA acyltransferase 1	ACAA1	97469	0	0	0	0	0	0	0	0	0	0	0	0	0							0						34453	12201	12629	0	38187	0	2.42412e-05	7.85088e-06	6.29152e-06		7.66149e-06		1000
1295	ENSGALP00000024722	ZPLD1	ENSGALP00000024722	1295	1295	97611	ENSGALP00000009420	Coatomer protein complex, subunit gamma 1	COPG1	815990	0	0	0	0	0	0	0	0	0	0	0	0	0							0						36721	577340	47969	21341	50096	82516	2.5837e-05	0.000371496	2.38972e-05	4.11537e-06	1.00508e-05	1.60472e-05	1000
803	ENSGALP00000014018	NDUFA1	ENSGALP00000014018	803	803	23548	ENSGALP00000009481	RAB7A, member RAS oncogene family	RAB7A	15183000	0	0	0	0	0	0	0	0	0	0	0	0	0							0						717430	448170	645620	4113000	4327100	4931300	0.000504785	0.00028838	0.000321635	0.000793145	0.00086815	0.00095901	1000
68	ENSGALP00000000734;ENSGALP00000043403	SRSF3	ENSGALP00000000734;ENSGALP00000043403	68	68	25674	ENSGALP00000009483	Transmembrane emp24 protein transport domain containing 5	TMED5	12037000	0	0	0	0	0	0	0	0	0	0	0	0	0							0						660760	501570	1162600	3253600	3193000	3265800	0.000464912	0.000322741	0.000579185	0.000627419	0.000640614	0.000635114	1000
155	ENSGALP00000002436	GLB1L2	ENSGALP00000002436	155	155	21326	ENSGALP00000009490	Transmembrane protein 9B; Uncharacterized protein	TMEM9B	757040	0	0	0	0	0	0	0	0	0	0	0	0	0							0						0	0	0	248450	200690	307900				4.79107e-05	4.02646e-05	5.98786e-05	1000
1219	ENSGALP00000023089	RPLP2	ENSGALP00000023089	1219	1219	33960	ENSGALP00000009511	Ribosomal protein L5	RPL5	15648000	0	0	0	0	0	0	0	0	0	0	0	0	0							0						979900	748590	1223100	3828500	4740800	4127300	0.000689459	0.000481689	0.000609325	0.000738282	0.000951151	0.000802653	1000
1106	ENSGALP00000020320	TNS3	ENSGALP00000020320	1106	1106	70823	ENSGALP00000009526_family	Family {Plastin 3}	PLS3;PLS2	523410	51442	0	0	0	0	0	1	0	0	0	6091.8	9162.7	5674.8				0.000257734	0.000211324	0.000207296	3	0.000225451	2.803e-05	1.14432e-05			27944	15667	88679	102740	109030	106980	1.96614e-05	1.00811e-05	4.41781e-05	1.98122e-05	2.18748e-05	2.08048e-05	1000
1771	ENSGALP00000042590	KRT18	ENSGALP00000042590	1771	1771	50179	ENSGALP00000009528	RuvB-like AAA ATPase 1	RUVBL1	2077600	0	0	0	0	0	0	0	0	0	0	0	0	0							0						186180	83181	109990	593510	524840	579890	0.000130997	5.35238e-05	5.47949e-05	0.000114452	0.000105299	0.000112774	1000
1468	ENSGALP00000030189	COX6C	ENSGALP00000030189	1468	1468	68368	ENSGALP00000009549	Calnexin	CANX	26507000	0	0	0	0	0	0	0	0	0	0	0	0	0							0						1580600	619850	2148600	7676800	7708100	6772500	0.00111211	0.00039885	0.00107039	0.00148038	0.00154648	0.00131708	1000
877	ENSGALP00000015517;ENSGALP00000015817	SLC25A13	ENSGALP00000015517;ENSGALP00000015817	877;878	877	16808	ENSGALP00000009552	Ribosomal protein L27a	RPL27A	10652000	0	0	0	0	0	0	0	15028	57550	0	0	0	0	0.000202958	0.00212838					2	0.00116567	0.00136148	0.00055582	0.00947718	0.00792931	851980	564820	711140	2848300	2954100	2649200	0.000599455	0.00036344	0.000354276	0.000549262	0.000592684	0.000515201	1000	0.00947718
1676	ENSGALP00000040865	LRP1	ENSGALP00000040865	1676	1676	36732	ENSGALP00000009563	Annexin A8	ANXA8	49481000	0	0	0	0	0	0	0	0	0	0	0	0	0							0						3771500	2538500	6286600	12124000	13019000	11742000	0.00265363	0.00163343	0.00313186	0.00233797	0.00261201	0.00228352	1000
1191	ENSGALP00000022386;ENSGALP00000022397	SRSF7	ENSGALP00000022386;ENSGALP00000022397	1191	1191	52278	ENSGALP00000009577	Sec61 alpha 1 subunit	SEC61A1	1194600	0	0	0	0	0	0	0	0	0	79784	0	0	0			0.000808355				1	0.000808355			0.00657214	#VALUE!	34676	85366	0	358450	361220	275120	2.43981e-05	5.49298e-05		6.9123e-05	7.24719e-05	5.35037e-05	1000	0.00657214
397	ENSGALP00000006618	FND3C2	ENSGALP00000006618	397	397	38140	ENSGALP00000009605	Proliferation-associated 2G4, 38kDa	PA2G4	64185	0	0	0	0	0	0	0	0	0	0	0	0	0							0						0	0	0	64185	0	0				1.23773e-05			1000
1663	ENSGALP00000040424	SNRNP40	ENSGALP00000040424	1663	1663	23237	ENSGALP00000009635	Related RAS viral (r-ras) oncogene homolog 2	RRAS2	1244800	0	0	0	0	0	0	0	0	0	0	0	0	0							0						22609	88880	41157	429310	303510	359320	1.59077e-05	5.71909e-05	2.05036e-05	8.27875e-05	6.08935e-05	6.98785e-05	1000
963	ENSGALP00000017231	UFSP2	ENSGALP00000017231	963	963	107120	ENSGALP00000009665	Coatomer protein complex, subunit beta 1	COPB1	713630	0	0	0	0	0	0	0	0	0	0	0	0	0							0						36826	29664	62265	200990	193480	190400	2.59108e-05	1.90877e-05	3.10192e-05	3.87586e-05	3.88181e-05	3.70279e-05	1000
1303	ENSGALP00000024853	SDCBP	ENSGALP00000024853	1303	1303	45419	ENSGALP00000009699	Golgi reassembly stacking protein 1, 65kDa	GORASP1	467480	0	0	0	0	0	0	0	0	0	0	0	0	0							0						0	0	0	154390	82572	230510				2.97723e-05	1.65665e-05	4.48282e-05	1000
308	ENSGALP00000005224;ENSGALP00000038881	IDH3A	ENSGALP00000005224;ENSGALP00000038881	308	308	23129	ENSGALP00000009708	Hepatoma-derived growth factor-related protein 3	HDGFRP3	1325500	0	0	0	0	0	0	0	0	0	0	0	0	0							0						0	79297	0	240140	596580	409440		5.10246e-05		4.63082e-05	0.000119692	7.96255e-05	1000
1745	ENSGALP00000042153	TIMM50	ENSGALP00000042153	1745	1745	22097	ENSGALP00000009725	DnaJ (Hsp40) homolog, subfamily C, member 5	DNAJC5	1192200	0	0	0	0	0	0	0	0	0	0	0	0	0							0						0	212720	0	365360	332610	281530		0.000136877		7.04555e-05	6.67318e-05	5.47503e-05	1000
256	ENSGALP00000004189	PCYOX1L	ENSGALP00000004189	256	256	47018	ENSGALP00000009728	Serine/threonine-protein kinase MST4	MST4	174020	0	0	0	0	0	0	0	0	0	0	0	0	0							0						0	0	0	37312	0	136710				7.19519e-06		2.65866e-05	1000
1620	ENSGALP00000038884	FLOT2	ENSGALP00000038884	1620	1620	18697	ENSGALP00000009751	Coiled-coil-helix-coiled-coil-helix domain containing 6	CHCHD6	1746100	0	0	0	0	0	0	0	0	0	0	0	0	0							0						120690	174640	167380	291920	508480	482970	8.49177e-05	0.000112374	8.33855e-05	5.62934e-05	0.000102017	9.39252e-05	1000
1258	ENSGALP00000023944	NNT	ENSGALP00000023944	1258	1258	16547	ENSGALP00000009787	NADH dehydrogenase (ubiquinone) 1, alpha/beta subcomplex, 1, 8kDa	NDUFAB1	4784200	0	0	0	0	0	0	0	0	0	0	0	0	0							0						0	0	0	1484000	1840400	1459800				0.000286172	0.000369241	0.000283893	1000
1466	ENSGALP00000030175	MAL2	ENSGALP00000030175	1466	1466	27672	ENSGALP00000009791	Methyltransferase like 7A	METTL7A	4563400	0	0	0	0	0	0	0	0	0	0	0	0	0							0						450170	348480	340100	1100900	1191900	1131800	0.00031674	0.000224234	0.000169431	0.000212296	0.000239132	0.000220106	1000
545	ENSGALP00000009490	TMEM9B	ENSGALP00000009490	545	545	66127	ENSGALP00000009801	Lamin A/C	LMNA	859660	0	0	0	0	0	0	0	0	0	0	0	0	0							0						26753	23459	0	358720	214580	236150	1.88235e-05	1.5095e-05		6.9175e-05	4.30514e-05	4.59251e-05	1000
1529	ENSGALP00000035064	COL2A1	ENSGALP00000035064	1529	1529	138680	ENSGALP00000009811	Pleckstrin homology domain containing, family A member 7	PLEKHA7	29534	0	0	0	0	0	0	0	0	0	0	0	0	0							0						0	0	0	16692	0	12842				3.21886e-06		2.49744e-06	1000
620	ENSGALP00000010800	ARPC4	ENSGALP00000010800	620	620	17222	ENSGALP00000009821	Ribosomal protein S13	RPS13	29423000	0	0	0	0	0	0	0	0	0	0	12401	0	0				0.000524665			1	0.000524665			0.00426567	#VALUE!	1776700	1169000	2874500	7411700	7516100	8662600	0.00125009	0.000752207	0.00143202	0.00142926	0.00150796	0.00168465	1000	0.00426567
491	ENSGALP00000008272	VMP1	ENSGALP00000008272	491	491	63540	ENSGALP00000009853	Zinc finger protein 326	ZNF326	818030	0	0	0	0	0	0	0	0	0	0	0	0	0							0						55868	37788	93095	233940	147550	249780	3.93088e-05	2.43151e-05	4.63781e-05	4.51126e-05	2.96031e-05	4.85758e-05	1000
1583	ENSGALP00000037658;ENSGALP00000012067	PTCHD3	ENSGALP00000012067;ENSGALP00000037658	1583	1583	110400	ENSGALP00000009858	Zinc finger CCCH-type containing 18	ZC3H18	68927	0	0	0	0	0	0	0	0	0	0	0	0	0							0						0	8677.7	0	0	31167	29082		5.58377e-06			6.25306e-06	5.6557e-06	1000
756	ENSGALP00000013156	SFXN2	ENSGALP00000013156	756	756	92985	ENSGALP00000009947	Leucine rich repeat containing 8 family, member C	LRRC8C	366350	0	0	0	0	0	0	0	0	0	0	0	0	0							0						0	0	0	69072	0	297280				1.33197e-05		5.78133e-05	1000
47	ENSGALP00000000383	A2ML1	ENSGALP00000000383	47	47	24395	ENSGALP00000009960	Ribosomal protein L13	RPL13	12079000	0	0	0	0	0	0	0	22562	0	0	0	0	0	0.000304708						1	0.000304708			0.00247735	#VALUE!	911460	1329600	1189900	2250000	2538800	3837100	0.000641305	0.000855547	0.000592785	0.000433887	0.000509362	0.000746217	1000	0.00247735
671	ENSGALP00000011608;ENSGALP00000011610	ATP13A4;ATP13A5	ENSGALP00000011608;ENSGALP00000011610	671	671	49256	ENSGALP00000009966	Ceramide synthase 5	CERS5	34266	0	0	0	0	0	0	0	0	0	0	0	0	0							0						0	0	0	21703	0	12563				4.18517e-06		2.44318e-06	1000
348	ENSGALP00000005847;ENSGALP00000042793;ENSGALP00000042856	MACF1	ENSGALP00000005847;ENSGALP00000042793;ENSGALP00000042856	348	348	100120	ENSGALP00000009976	Usher syndrome 1C (harmonin)	USH1C	68843	0	0	0	0	0	0	0	0	0	54286	14557	0	0			0.000550014	0.000615882			2	0.000582948	4.65755e-05	1.90144e-05	0.00473952	0.000688878	0	0	0	0	0	0							1000	0.00473952
1672	ENSGALP00000040722	NMNAT1	ENSGALP00000040722	1672	1672	76970	ENSGALP00000009988	Lanosterol synthase (2,3-oxidosqualene-lanosterol cyclase)	LSS	831460	0	0	0	0	0	0	0	0	0	0	0	0	0							0						16777	38774	53795	170560	239310	312250	1.18043e-05	2.49496e-05	2.67996e-05	3.28905e-05	4.8013e-05	6.07246e-05	1000
359	ENSGALP00000006008	SLC35E1	ENSGALP00000006008	359	359	53102	ENSGALP00000010006	Histocompatibility (minor) 13	HM13	681550	0	0	0	0	0	0	0	0	0	0	0	0	0							0						0	66043	21318	203630	176360	214210		4.24962e-05	1.06202e-05	3.92677e-05	3.53833e-05	4.16583e-05	1000
637	ENSGALP00000011124	CTSA	ENSGALP00000011124	637	637	312350	ENSGALP00000010009	Otogelin	OTOG	261500	0	0	0	0	0	0	0	0	0	0	0	0	0							0						20401	20274	7582	62869	79947	70423	1.43542e-05	1.30455e-05	3.7772e-06	1.21236e-05	1.60398e-05	1.36955e-05	1000
1267	ENSGALP00000024147	LAMA4	ENSGALP00000024147	1267	1267	204230	ENSGALP00000010031	Kinesin family member 1A	KIF1A	1245.4	0	0	0	0	0	0	0	1245.4	0	0	0	0	0	1.68196e-05						1	1.68196e-05			0.000136748	#VALUE!	0	0	0	0	0	0							1000	0.000136748
482	ENSGALP00000008151	HDAC11	ENSGALP00000008151	482	482	69878	ENSGALP00000010060	UDP-N-acetyl-alpha-D-galactosamine:polypeptide N-acetylgalactosaminyltransferase 11 (GalNAc-T11)	GALNT11	66383	0	0	0	0	0	0	0	0	0	0	0	0	0							0						0	0	0	51740	14644	0				9.97746e-06	2.93804e-06		1000
1236	ENSGALP00000023347	LEPREL2	ENSGALP00000023347	1236	1236	82850	ENSGALP00000010103	Kin of IRRE like	KIRREL	73137	0	0	0	0	0	0	0	0	0	0	0	0	0							0						0	0	0	19683	21467	31986				3.79564e-06	4.30694e-06	6.22045e-06	1000
437	ENSGALP00000007476	SET	ENSGALP00000007476	437	437	14192	ENSGALP00000010113	Serum amyloid A protein	NONE	3250900	0	0	0	0	0	0	0	0	0	0	0	0	0							0						174560	199890	303470	609960	661220	1301800	0.000122821	0.000128622	0.000151183	0.000117624	0.000132661	0.000253166	1000
451	ENSGALP00000007644	MPRIP	ENSGALP00000007644	451	451	91597	ENSGALP00000010189	Deafness, autosomal recessive 31 (whirlin)	DFNB31	13896	0	0	0	0	0	0	0	3789.6	0	6087.7	0	4018.7	0	5.11799e-05		6.16793e-05		9.26852e-05		3	6.85148e-05	2.15805e-05	8.81018e-06	0.000557043	0.000118201	0	0	0	0	0	0							1000	0.000557043
487	ENSGALP00000008213;ENSGALP00000012482	MYO1B;MYO1H	ENSGALP00000008213	262;487	487	44426	ENSGALP00000010193	Tumor susceptibility gene 101 (TSG101	TSG101	0	0	0	0	0	0	0	0	0	0	0	0	0	0							0						0	0	0	0	0	0							1000
1435	ENSGALP00000027835	CCDC90B	ENSGALP00000027835	1435	1435	102910	ENSGALP00000010207	Chloride channel accessory 2	CLCA2	306010	0	0	0	0	0	0	0	0	0	0	0	0	0							0						11747	5451.3	34955	81129	66544	106190	8.26521e-06	3.5077e-06	1.74139e-05	1.56448e-05	1.33508e-05	2.06512e-05	1000
1444	ENSGALP00000028049	JUP	ENSGALP00000028049	1072;1444	1444	35216	ENSGALP00000010210	Leukocyte cell-derived chemotaxin 2	LECT2	116900	0	0	0	0	0	0	0	9174	0	0	0	0	0	0.000123898						1	0.000123898			0.00100732	#VALUE!	56679	0	51050	0	0	0	3.98794e-05		2.54321e-05				1000	0.00100732
554	ENSGALP00000009635	RRAS2	ENSGALP00000009635	554	554	12484	ENSGALP00000010214	Macrophage migration inhibitory factor (glycosylation-inhibiting factor)	MIF	909700	0	0	0	0	0	0	0	0	0	0	0	0	0							0						0	0	0	401060	433090	75551				7.73398e-05	8.68912e-05	1.46927e-05	1000
1806	ENSGALP00000043129	COX7C	ENSGALP00000043129	1806	1806	44867	ENSGALP00000010241	Transmembrane protein 43	TMEM43	6752800	0	0	0	0	0	0	0	0	0	0	0	0	0							0						429970	210810	568640	2003700	2017900	1521700	0.000302528	0.000135648	0.000283285	0.00038639	0.000404853	0.000295931	1000
1459	ENSGALP00000029405	CD9	ENSGALP00000029405	1459	1459	39210	ENSGALP00000010267	H2A histone family, member Y	H2AFY	19169000	0	0	0	0	0	0	0	0	0	0	0	0	0							0						1613300	1009900	2038100	4739300	5112200	4656500	0.00113512	0.000649832	0.00101534	0.000913919	0.00102567	0.000905569	1000
1467	ENSGALP00000030179	ENY2	ENSGALP00000030179	1467	1467	31902	ENSGALP00000010335	Calcium modulating ligand	CAMLG	797170	0	0	0	0	0	0	0	0	0	0	0	0	0							0						39776	38366	0	317390	234090	167560	2.79865e-05	2.46871e-05		6.1205e-05	4.69657e-05	3.25861e-05	1000
1638	ENSGALP00000039447	HSPB1	ENSGALP00000039447	1638	1638	24462	ENSGALP00000010393	Dual specificity phosphatase 15	DUSP15	109610	0	0	0	0	0	0	0	0	0	0	0	0	0							0						0	0	0	49730	0	59876				9.58986e-06		1.16443e-05	1000
74;705	ENSGALP00000000864;ENSGALP00000012298;ENSGALP00000040668;ENSGALP00000040834	RAB11B;RAB11A;RAB25	ENSGALP00000000864;ENSGALP00000040668;ENSGALP00000012298	74;705	74;705	28146	ENSGALP00000010404	Signal recognition particle receptor, B subunit	SRPRB	10672000	0	0	0	0	0	0	0	0	0	0	0	0	0							0						654690	591240	956650	2681400	2813300	2974500	0.000460641	0.00038044	0.000476584	0.000517077	0.000564435	0.000578463	1000
1317	ENSGALP00000025070	HTRA1	ENSGALP00000025070	1317	1317	77818	ENSGALP00000010405	Lactotransferrin	LTF	1120700	0	0	19726	0	0	0	1	0	0	0	0	8083.3	0					0.000186429		1	0.000186429					19803	34725	107120	306660	367370	257260	1.39334e-05	2.23442e-05	5.33651e-05	5.91359e-05	7.37058e-05	5.00304e-05	1000
515	ENSGALP00000008824	NONO	ENSGALP00000008824	515	515	96281	ENSGALP00000010409	Sphingomyelin phosphodiesterase 4, neutral membrane (neutral sphingomyelinase-3)	SMPD4	54013	0	0	0	0	0	0	0	0	0	0	0	0	0							0						0	0	0	15859	19386	18768				3.05823e-06	3.88943e-06	3.64989e-06	1000
1480	ENSGALP00000031700	NSDHL	ENSGALP00000031700	1480	1480	41551	ENSGALP00000010414	RNA binding motif protein, X-linked	RBMX	283450	0	0	0	0	0	0	0	0	0	0	0	0	0							0						25758	18383	25877	64553	121880	27002	1.81234e-05	1.18288e-05	1.28914e-05	1.24483e-05	2.44529e-05	5.25119e-06	1000
326	ENSGALP00000005520	ALDH9A1	ENSGALP00000005520	326	326	46705	ENSGALP00000010426	Coiled-coil domain containing 51	CCDC51	242810	0	0	0	0	0	0	0	0	0	0	0	0	0							0						0	0	0	93949	79994	68864				1.8117e-05	1.60493e-05	1.33923e-05	1000
570	ENSGALP00000009947	LRRC8C	ENSGALP00000009947	570	570	114380	ENSGALP00000010431	ATPase, H+/K+ transporting, nongastric, alpha polypeptide	ATP12A	495490	0	0	0	0	0	0	0	0	0	0	0	0	0							0						26196	22423	36578	120120	133910	156250	1.84315e-05	1.44283e-05	1.82224e-05	2.31638e-05	2.68665e-05	3.03866e-05	1000
778	ENSGALP00000013585	CKMT1A	ENSGALP00000013585	778	778	37049	ENSGALP00000010441	Potassium voltage-gated channel, KQT-like subfamily, member 1	KCNQ1	686040	0	0	0	0	0	0	0	0	0	0	0	0	0							0						36147	0	0	262920	208750	178230	2.54331e-05			5.07011e-05	4.18817e-05	3.46611e-05	1000
96	ENSGALP00000001352	CGN	ENSGALP00000001352	96	96	212390	ENSGALP00000010443	Plexin A4	PLXNA4	25529	0	0	0	0	0	0	0	0	0	0	0	0	0							0						0	0	3972.9	7509.2	4012	10035			1.97922e-06	1.44806e-06	8.04931e-07	1.95155e-06	1000
1100	ENSGALP00000020135	ATL1	ENSGALP00000020135	1100	1100	18658	ENSGALP00000010447	S-phase kinase-associated protein 1	CTD-2410N18.5	207460	0	0	0	0	0	0	0	0	0	0	0	0	0							0						0	0	0	0	124550	82916					2.49886e-05	1.6125e-05	1000
1368	ENSGALP00000026139;ENSGALP00000035865	ATP6AP2	ENSGALP00000026139;ENSGALP00000035865	1368	1368	74082	ENSGALP00000010473	Transmembrane 9 superfamily member 2-like	TM9SF2	524560	0	0	0	0	0	0	0	0	0	0	0	0	0							0						27140	0	28508	214840	135060	119000	1.90957e-05		1.42021e-05	4.14294e-05	2.70972e-05	2.31424e-05	1000
1181	ENSGALP00000022049	SEC61B	ENSGALP00000022049	1181	1181	15567	ENSGALP00000010475	Coiled-coil-helix-coiled-coil-helix domain containing 3	CHCHD3	4499100	0	0	0	0	0	0	0	0	0	0	0	0	0							0						1171200	688120	1027600	460850	1151200	0	0.000824058	0.000442779	0.00051193	8.88696e-05	0.000230966		1000
517;668	ENSGALP00000008845;ENSGALP00000011574;ENSGALP00000011575	DYNLL2;DYNLL1	ENSGALP00000008845;ENSGALP00000011574;ENSGALP00000011575	517;668	517;668	61748	ENSGALP00000010490	Gamma-glutamyltransferase 5	GGT5	1651300	0	0	0	0	0	0	0	0	0	0	0	0	0							0						198360	163750	224080	413090	543690	108310	0.000139566	0.000105367	0.000111632	7.96597e-05	0.000109081	2.10635e-05	1000
1183	ENSGALP00000022148	MBP	ENSGALP00000022148	1183	1183	30706	ENSGALP00000010494	Voltage-dependent anion channel 1	VDAC1	67491000	0	0	0	0	0	0	0	0	0	0	0	0	0							0						4855200	3052400	8696300	16295000	17004000	17588000	0.00341613	0.0019641	0.00433233	0.0031423	0.00341153	0.00342041	1000
355	ENSGALP00000005973	SDF2	ENSGALP00000005973	355	355	30468	ENSGALP00000010503	Chromosome 5 open reading frame 15	C5ORF15	375230	0	0	0	0	0	0	0	0	0	0	0	0	0							0						0	17701	28759	67134	85921	175720		1.13899e-05	1.43272e-05	1.2946e-05	1.72384e-05	3.4173e-05	1000
885	ENSGALP00000015626	PCK2	ENSGALP00000015626	885	885	70870	ENSGALP00000010510_family	Family {Heat shock 70kDa protein 8}	HSPA8;HSPA2	34409000	182600	0	0	0	0	0	1	449720	17314	330530	92508	100730	63015	0.00607363	0.000640325	0.00334886	0.00391386	0.00232318	0.00230189	6	0.00310029	0.00183615	0.000749604			2732757	1681748	3342389	7816920	8646820	8952250	0.00192277	0.00108214	0.00166511	0.0015074	0.00173482	0.00174098	1000
1424	ENSGALP00000027467	SLC25A15	ENSGALP00000027467	1424	1424	33798	ENSGALP00000010541	Transformer 2 beta homolog	TRA2B	2478300	0	0	0	0	0	0	0	0	0	0	0	0	0							0						227070	90483	226710	621730	674870	637480	0.000159767	5.82224e-05	0.000112943	0.000119893	0.0001354	0.000123973	1000
160	ENSGALP00000002505	GLT8D1	ENSGALP00000002505	160	160	26202	ENSGALP00000010560	CD81 molecule	CD81	1842200	0	0	0	0	0	0	0	0	0	0	0	0	0							0						0	0	0	460380	640720	741080				8.8779e-05	0.000128548	0.000144121	1000
1074	ENSGALP00000019435	NHP2L1	ENSGALP00000019435	1074	1074	40914	ENSGALP00000010583	DnaJ (Hsp40) homolog, subfamily B, member 11	DNAJB11	2162300	0	0	0	0	0	0	0	0	0	0	0	0	0							0						32326	30423	150660	565110	688580	695160	2.27446e-05	1.9576e-05	7.50559e-05	0.000108975	0.00013815	0.000135191	1000
246	ENSGALP00000003954	SFPQ	ENSGALP00000003954	246	246	61625	ENSGALP00000010584	Gamma-glutamyltransferase light chain 1-like	GGTLC1L	411080	0	0	0	0	0	0	0	0	0	0	0	0	0							0						18138	53235	79422	129950	0	130340	1.27619e-05	3.42547e-05	3.95665e-05	2.50594e-05		2.53478e-05	1000
860	ENSGALP00000015246	PRDX3	ENSGALP00000015246	860	860	74961	ENSGALP00000010593	Transmembrane 9 superfamily protein member 4	TM9SF4	5533700	0	0	0	0	0	0	0	0	0	0	0	0	0							0						122420	34504	133820	1588400	1848200	1806400	8.61349e-05	2.2202e-05	6.66665e-05	0.000306305	0.000370806	0.000351298	1000
1033	ENSGALP00000018740;ENSGALP00000042399	C3D	ENSGALP00000018740;ENSGALP00000042399	1033	1033	246100	ENSGALP00000010625	Sortilin-related receptor, L(DLR class) A repeats containing	SORL1	202670	0	0	0	0	0	0	0	0	0	0	0	0	0							0						9146.5	5942.1	11158	49161	73471	53792	6.43549e-06	3.82351e-06	5.5587e-06	9.48013e-06	1.47405e-05	1.04612e-05	1000
754	ENSGALP00000013122	HSPD1	ENSGALP00000013122	754	754	13916	ENSGALP00000010633	Small nuclear ribonucleoprotein D3 polypeptide 18kDa	SNRPD3	5860100	0	0	0	0	0	0	0	0	0	0	0	0	0							0						562440	422510	763860	1411800	1537900	1161500	0.000395734	0.000271869	0.00038054	0.000272249	0.00030855	0.000225882	1000
388	ENSGALP00000006421	MINOS1	ENSGALP00000006421	388	388	43298	ENSGALP00000010662	Cathepsin D	CTSD	289410	31287	0	0	0	0	0	1	0	0	0	0	0	0							0						35904	0	0	112580	109650	0	2.52621e-05			2.17098e-05	2.19992e-05		1000
247	ENSGALP00000004005	CSGALNACT2	ENSGALP00000004005	247	247	29143	ENSGALP00000010754	Microtubule-associated protein, RP/EB family, member 1	MAPRE1	441940	0	0	0	0	0	0	0	0	0	0	0	0	0							0						0	0	0	151020	149200	141710				2.91225e-05	2.99341e-05	2.75589e-05	1000
1460	ENSGALP00000029700	C21ORF33	ENSGALP00000029700	1460	1460	70716	ENSGALP00000010768	UDP-N-acetyl-alpha-D-galactosamine:polypeptide N-acetylgalactosaminyltransferase 6 (GalNAc-T6)	GALNT6	397850	0	0	0	0	0	0	0	0	0	0	0	0	0							0						0	22737	56472	180030	58690	79923		1.46304e-05	2.81332e-05	3.47167e-05	1.1775e-05	1.5543e-05	1000
792	ENSGALP00000013850	C1GALT1C1	ENSGALP00000013850	792	792	19703	ENSGALP00000010800	Actin related protein 2/3 complex, subunit 4, 20kDa	ARPC4	1968000	27369	0	0	0	0	0	1	0	0	0	0	0	0							0						136130	35491	70311	443390	748500	506850	9.57813e-05	2.28371e-05	3.50276e-05	8.55027e-05	0.000150172	9.85692e-05	1000
1508	ENSGALP00000034108;ENSGALP00000003096	PKM;PKM2	ENSGALP00000003096;ENSGALP00000034108	1508	1508	30570	ENSGALP00000010809	Toll interacting protein	TOLLIP	3143500	0	0	0	0	0	0	0	0	0	67132	0	0	0			0.000680167				1	0.000680167			0.00552994	#VALUE!	0	17143	198360	832500	885030	1143400		1.10309e-05	9.88191e-05	0.000160538	0.000177564	0.000222362	1000	0.00552994
1770	ENSGALP00000042585	NDUFS4	ENSGALP00000042585	1770	1770	133450	ENSGALP00000010874	NODAL modulator 1	NOMO1	3161200	0	0	0	0	0	0	0	0	0	0	0	0	0							0						233050	123890	297450	652920	940670	913170	0.000163974	7.97185e-05	0.000148184	0.000125908	0.000188727	0.000177588	1000
930	ENSGALP00000016521	SLC35B2	ENSGALP00000016521	930	930	57258	ENSGALP00000010887	Poliovirus receptor-related 1 (herpesvirus entry mediator C)	PVRL1	132150	0	0	0	0	0	0	0	0	0	0	0	0	0							0						0	0	0	84950	47198	0				1.63816e-05	9.46938e-06		1000
761	ENSGALP00000013240;ENSGALP00000042294	SPTBN1	ENSGALP00000013240;ENSGALP00000042294	761	761	32722	ENSGALP00000010899	ATP synthase, H+ transporting, mitochondrial F1 complex, gamma polypeptide 1	ATP5C1	48498000	0	0	0	0	0	0	0	13835	0	187980	0	41796	0	0.000186847		0.00190457		0.000963961		3	0.00101846	0.000860159	0.000351159	0.00828035	0.00413787	4111000	2125700	5590200	12551000	13638000	10239000	0.00289251	0.00136781	0.00278493	0.00242032	0.0027362	0.00199122	1000	0.00828035
1720	NP_990647.1;ENSGALP00000041715	CALB2	ENSGALP00000041715;NP_990647.1	1720	1720	69001	ENSGALP00000010929	Melanoma cell adhesion molecule	MCAM	622640	0	0	0	0	0	0	0	0	0	0	0	0	0							0						45410	50059	35399	114960	198990	177820	3.19506e-05	3.22111e-05	1.76351e-05	2.21687e-05	3.99235e-05	3.45814e-05	1000
150;1611	ENSGALP00000002373;ENSGALP00000038523	ATP2A2;ATP2A3	ENSGALP00000038523;ENSGALP00000002373	150;1611	150;1611	17336	ENSGALP00000010942	Ribosomal protein S15a	RPS15A	15936000	0	0	0	0	0	0	0	0	0	0	61533	55404	22122				0.00260336	0.00127781	0.000808098	3	0.00156309	0.000931008	0.000380082	0.0127083	0.00458576	562010	88363	1216900	4848100	3859000	5222600	0.000395431	5.68582e-05	0.000606236	0.0009349	0.000774234	0.00101566	1000	0.0127083
495	ENSGALP00000008311	SEC24C	ENSGALP00000008311	495	495	111210	ENSGALP00000010953	NLR family member X1	NLRX1	64538	0	0	0	0	0	0	0	0	0	0	0	0	0							0						0	0	0	11642	37923	14972				2.24503e-06	7.60852e-06	2.91167e-06	1000
103;864	ENSGALP00000001460;ENSGALP00000002147;ENSGALP00000015326	SRSF6;SRSF4;SRSF5	ENSGALP00000001460;ENSGALP00000015326	103;864	103;864	23566	ENSGALP00000010955	ADP-ribosylation factor-like 6 interacting protein 1 (ARL6IP1	ARL6IP1	7384800	0	0	0	0	0	0	0	0	0	0	0	0	0							0						546520	168070	0	2895100	3104800	670260	0.000384532	0.000108147		0.000558287	0.000622919	0.000130348	1000
82	ENSGALP00000000999	PSMD7	ENSGALP00000000999	82	82	32839	ENSGALP00000010956	Mitochondrial ribosomal protein L46 (MRPL46), nuclear gene encoding mitochondrial protein, mRNA.	MRPL46	134670	0	0	0	0	0	0	0	0	0	0	0	0	0							0						0	0	28605	0	42094	63967			1.42505e-05		8.44536e-06	1.24399e-05	1000
1326	ENSGALP00000025184	TCEB1	ENSGALP00000025184	1326	1326	87010	ENSGALP00000010958	Procollagen-lysine, 2-oxoglutarate 5-dioxygenase 2	PLOD2	374830	0	0	0	0	0	0	0	0	0	0	0	0	0							0						49064	23297	34187	73445	98354	96484	3.45215e-05	1.49907e-05	1.70313e-05	1.4163e-05	1.97328e-05	1.87636e-05	1000
380	ENSGALP00000006326	TWF2	ENSGALP00000006326	380	380	44200	ENSGALP00000010965	Regulation of nuclear pre-mRNA domain containing 1B	RPRD1B	175070	0	0	0	0	0	0	0	0	0	0	0	0	0							0						0	0	0	129900	45174	0				2.50497e-05	9.0633e-06		1000
369	ENSGALP00000006172	SGCD	ENSGALP00000006172	369	369	109010	ENSGALP00000010984	Adaptor-related protein complex 2, alpha 2 subunit	AP2A2	888300	0	0	0	0	0	0	0	0	0	0	0	0	0							0						60084	53745	87916	173470	294180	218920	4.22752e-05	3.45829e-05	4.3798e-05	3.34517e-05	5.90216e-05	4.25743e-05	1000
1302	ENSGALP00000024827	IMPAD1	ENSGALP00000024827	1302	1302	33665	ENSGALP00000010994	Phospholipid scramblase 1	PLSCR1	549760	0	0	0	0	0	0	0	0	0	0	0	0	0							0						0	0	0	206570	0	343190				3.98346e-05		6.67416e-05	1000
1630	ENSGALP00000039140;ENSGALP00000020169	PYGB;PYGL	ENSGALP00000039140	1630	1630	36644	ENSGALP00000011015	Tenomodulin	TNMD	4540100	0	0	0	0	0	0	0	0	0	29052	0	0	0			0.000294349				1	0.000294349			0.00239313	#VALUE!	1368500	571680	1522900	379470	297860	370640	0.000962879	0.000367854	0.000758679	7.31764e-05	5.97599e-05	7.20799e-05	1000	0.00239313
652	ENSGALP00000011435	OTOA	ENSGALP00000011435	652	652	45026	ENSGALP00000011025	Chitinase domain containing 1	CHID1	352470	0	0	0	0	0	0	0	0	0	0	0	0	0							0						19498	0	0	92854	77875	162240	1.37188e-05			1.79058e-05	1.56241e-05	3.15515e-05	1000
1062	ENSGALP00000019233	KIAA1467	ENSGALP00000019233	1062	1062	53182	ENSGALP00000011124	Cathepsin A	CTSA	167090	0	0	0	0	0	0	0	0	0	0	0	0	0							0						0	0	0	78110	0	88984				1.50626e-05		1.73051e-05	1000
1017	ENSGALP00000018445	LPHN3	ENSGALP00000018445	1017	1017	124120	ENSGALP00000011131	Solute carrier family 38, member 10	SLC38A10	46329	0	0	0	0	0	0	0	0	0	0	0	0	0							0						0	0	0	17571	0	28758				3.38837e-06		5.59269e-06	1000
954	ENSGALP00000017050;ENSGALP00000042073	SPTLC2	ENSGALP00000017050;ENSGALP00000042073	954	954	31422	ENSGALP00000011138	Membrane-associated ring finger (C3HC4) 5	MARCH5_	89616	0	0	0	0	0	0	0	0	0	0	0	0	0							0						0	0	46932	0	0	42683			2.33806e-05			8.30074e-06	1000
1528	ENSGALP00000034956;ENSGALP00000004243;ENSGALP00000041361	RPL17	ENSGALP00000004243;ENSGALP00000034956;ENSGALP00000041361	1528	1528	21365	ENSGALP00000011140_family	Family {Harvey rat sarcoma viral oncogene homolog}	HRAS;KRAS	5732060	0	0	0	0	0	0	0	0	0	0	0	0	0							0						288150	202870	403790	1537510	1675800	1623950	0.000202743	0.000130539	0.00020116	0.000296491	0.000336217	0.000315816	1000
870	ENSGALP00000015410;ENSGALP00000015409;ENSGALP00000031979;ENSGALP00000037227;ENSGALP00000023309	ACTN1;ACTN2	ENSGALP00000015409;ENSGALP00000015410	870;1218	870	11710	ENSGALP00000011160	ATP synthase, H+ transporting, mitochondrial Fo complex, subunit G	ATP5L	60013000	0	0	0	0	0	0	0	0	0	50954	0	0	0			0.000516255				1	0.000516255			0.00419729	#VALUE!	3692600	4357400	4764800	15557000	14900000	16690000	0.00259812	0.00280382	0.00237373	0.00299999	0.0029894	0.00324577	1000	0.00419729
1285	ENSGALP00000024499	DTNA	ENSGALP00000024499	1285	1285	62519	ENSGALP00000011164	Septin 8	SEPT8_	61624	0	0	42585	0	0	0	1	0	0	0	0	0	0							0						0	0	0	0	0	19040						3.70279e-06	1000
349	ENSGALP00000041149;ENSGALP00000005854	PSMD12	ENSGALP00000005854;ENSGALP00000041149	349	349	100350	ENSGALP00000011181	Discs, large homolog 1	DLG1	192740	0	0	0	0	0	0	0	0	0	0	0	0	0							0						0	0	0	72640	54054	66048				1.40078e-05	1.08449e-05	1.28446e-05	1000
1282	ENSGALP00000024430	PCSK5	ENSGALP00000024430	1282	1282	120510	ENSGALP00000011182	Ubiquitination factor E4A	UBE4A	63391	0	0	0	0	0	0	0	0	0	0	0	0	0							0						11513	7858.7	0	36890	0	7128.9	8.10057e-06	5.05677e-06		7.11381e-06		1.38639e-06	1000
582	ENSGALP00000039050;ENSGALP00000010153	PSMD2	ENSGALP00000010153;ENSGALP00000039050	582	582	125430	ENSGALP00000011213	Solute carrier family 12 (potassium/chloride transporter), member 5	SLC12A5	71779	0	0	0	0	0	0	0	0	0	0	0	0	0							0						0	0	0	47352	24427	0				9.13129e-06	4.90081e-06		1000
7	ENSGALP00000036403;CON__ENSGALP00000020965;ENSGALP00000020965	CON;SERPINB12;SERPINB13	CON__ENSGALP00000020965;ENSGALP00000020965;ENSGALP00000036403	7	7	61197	ENSGALP00000011232	Phosphofructokinase, platelet	PFKP	527600	0	0	0	0	0	0	0	0	0	0	0	3761.3	0					8.67487e-05		1	8.67487e-05			0.00070529	#VALUE!	14514	25127	62067	182640	96757	142730	1.02121e-05	1.61683e-05	3.09206e-05	3.522e-05	1.94124e-05	2.77573e-05	1000	0.00070529
1808	ENSGALP00000043162	CISD2	ENSGALP00000043162	1808	1808	38038	ENSGALP00000011241	3-hydroxybutyrate dehydrogenase, type 1	BDH1	7159100	0	0	0	0	0	0	0	0	0	0	0	0	0							0						375020	593620	626910	1527200	2082800	1953500	0.000263865	0.000381972	0.000312314	0.000294503	0.000417874	0.000379905	1000
1084	ENSGALP00000019755	EIF3M	ENSGALP00000019755	1084	1084	30094	ENSGALP00000011291	Apolipoprotein O-like (APOOL	APOOL	1055000	0	0	0	0	0	0	0	0	0	0	0	0	0							0						75944	58987	83071	258310	291190	287490	5.34343e-05	3.79559e-05	4.13844e-05	4.98121e-05	5.84217e-05	5.59094e-05	1000
1433	ENSGALP00000027758	ENDOD1	ENSGALP00000027758	1433	1433	45502	ENSGALP00000011344	Protein kinase, cAMP-dependent, regulatory, type II, alpha	PRKAR2A	1245400	0	0	0	0	0	0	0	0	0	0	0	0	0							0						53866	55894	33051	367600	285190	449760	3.79002e-05	3.59657e-05	1.64654e-05	7.08874e-05	5.72179e-05	8.74667e-05	1000
1119	ENSGALP00000020581	RECK	ENSGALP00000020581	1119	1119	117310	ENSGALP00000011372	Pitrilysin metallopeptidase 1	PITRM1	28867	0	0	0	0	0	0	0	0	0	0	0	0	0							0						0	0	0	0	8485.7	20382					1.70249e-06	3.96377e-06	1000
1130	ENSGALP00000020867	ECI2	ENSGALP00000020867	1130	1130	127570	ENSGALP00000011435	Otoancorin	OTOA	321070	0	0	0	0	0	0	0	0	0	0	0	0	0							0						23826	23480	21076	97043	105010	50642	1.6764e-05	1.51085e-05	1.04997e-05	1.87136e-05	2.10682e-05	9.84856e-06	1000
989	ENSGALP00000017856	TRA2A	ENSGALP00000017856	989	989	87884	ENSGALP00000011452	Carnitine palmitoyltransferase 1A (liver)	CPT1A	2560600	0	0	0	0	0	0	0	0	0	0	0	0	0							0						18595	12342	91103	796320	851180	791050	1.30835e-05	7.94161e-06	4.53857e-05	0.000153561	0.000170773	0.000153839	1000
435	ENSGALP00000007317	HEBP2	ENSGALP00000007317	435	435	31085	ENSGALP00000011488	Malectin	MLEC	12742000	0	0	0	0	0	0	0	0	0	0	0	0	0							0						738670	418940	857150	3491500	3578700	3656600	0.000519729	0.000269572	0.000427015	0.000673296	0.000717998	0.000711114	1000
64	ENSGALP00000000643	RPL36	ENSGALP00000000643	64	64	39005	ENSGALP00000011491	Pyruvate dehydrogenase (lipoamide) beta	PDHB	3027200	0	0	0	0	0	0	0	0	0	0	0	0	0							0						196030	174260	518700	744010	719650	674610	0.000137927	0.00011213	0.000258406	0.000143474	0.000144384	0.000131194	1000
1530	ENSGALP00000035122;ENSGALP00000000211	BRD2;BRD4	ENSGALP00000035122	1530	1530	62151	ENSGALP00000011493	Leucine rich repeat containing 15	LRRC15	223880	0	0	0	0	0	0	0	0	0	0	0	0	0							0						0	11064	0	72602	82861	57354		7.11926e-06		1.40005e-05	1.66245e-05	1.11539e-05	1000
947	ENSGALP00000016743	EPHX1L	ENSGALP00000016743	947	947	40852	ENSGALP00000011502	Apolipoprotein A-IV (APOA4	APOAIV	512020	0	0	0	0	0	0	0	0	0	0	0	0	0							0						20753	0	0	154740	104160	232370	1.46018e-05			2.98398e-05	2.08977e-05	4.519e-05	1000
426	ENSGALP00000007138	FAM73B	ENSGALP00000007138	426	426	198920	ENSGALP00000011509	Tenascin C	TNC	59013	0	0	0	0	0	0	0	0	0	0	0	0	0							0						3318.3	0	2366.4	18079	29116	6133.7	2.33476e-06		1.17889e-06	3.48633e-06	5.84157e-06	1.19285e-06	1000
733	ENSGALP00000012878	PGK1	ENSGALP00000012878	733	733	30680	ENSGALP00000011510	Apolipoprotein A-I	APOA1	11410000	0	0	0	0	0	0	0	0	0	0	10979	0	0				0.000464503			1	0.000464503			0.00377653	#VALUE!	756620	642990	956940	2799000	2681900	3561200	0.000532359	0.00041374	0.000476729	0.000539755	0.000538072	0.000692561	1000	0.00377653
1269	ENSGALP00000024162	STX18	ENSGALP00000024162	1269	1269	52014	ENSGALP00000011533	Fatty acid desaturase 1; Uncharacterized protein	FADS1	303720	0	0	0	0	0	0	0	0	0	0	0	0	0							0						0	0	0	100790	72243	130690				1.94362e-05	1.44942e-05	2.54158e-05	1000
98	ENSGALP00000001407	TMEM222	ENSGALP00000001407	98	98	56311	ENSGALP00000011537	Aldehyde dehydrogenase 1 family, member A3	ALDH1A3	185980	0	0	0	0	0	0	0	0	0	0	0	0	0							0						0	0	0	31300	121760	32922				6.03584e-06	2.44288e-05	6.40248e-06	1000
1243	ENSGALP00000023446	PHB2	ENSGALP00000023446	1243	1243	20248	ENSGALP00000011538	Ras-related C3 botulinum toxin substrate 1 (rho family, small GTP binding protein Rac1)	RAC1	12168000	72361	0	0	0	0	0	1	0	0	0	0	0	0							0						1603900	1249900	1833500	1665300	3296600	2446400	0.00112851	0.000804263	0.000913414	0.000321134	0.0006614	0.000475762	1000
723	ENSGALP00000012723	ATRX	ENSGALP00000012723	723	723	75493	ENSGALP00000011541	Acyl-CoA oxidase 2, branched chain	ACOX2	60748	0	0	0	0	0	0	0	0	0	0	0	0	0							0						10986	0	0	24014	25748	0	7.72977e-06			4.63082e-06	5.16584e-06		1000
812	ENSGALP00000014293	TECTB	ENSGALP00000014293	812	812	88618	ENSGALP00000011559	Integrin, beta 1	ITGB1	4734400	0	0	0	0	0	0	0	0	0	0	0	0	0							0						392520	376890	306380	1118900	1159900	1379800	0.000276178	0.000242514	0.000152633	0.000215767	0.000232712	0.000268335	1000
1575	ENSGALP00000037404	CPT2	ENSGALP00000037404	1575	1575	113420	ENSGALP00000011569	Optic atrophy 1 (autosomal dominant)	OPA1	1014100	0	0	0	0	0	0	0	0	0	0	0	0	0							0						40132	47965	85435	338310	227540	274740	2.82369e-05	3.08636e-05	4.25621e-05	6.52392e-05	4.56515e-05	5.34298e-05	1000
102	ENSGALP00000039997;ENSGALP00000001456	EFTUD2	ENSGALP00000001456;ENSGALP00000039997	102	102	51990	ENSGALP00000011607	Fatty acid desaturase 2	FADS2	981420	0	0	0	0	0	0	0	0	0	0	0	0	0							0						100050	0	0	211600	485360	184410	7.03953e-05			4.08046e-05	9.73782e-05	3.5863e-05	1000
383	ENSGALP00000006386	TOR1AIP2	ENSGALP00000006386	383	383	133160	ENSGALP00000011608	ATPase type 13A5	ATP13A5	33944	0	0	0	0	0	0	0	0	0	0	0	0	0							0						0	0	0	11561	0	22383				2.22941e-06		4.35292e-06	1000
717	ENSGALP00000012616	PAM16	ENSGALP00000012616	717	717	42521	ENSGALP00000011618	ERGIC and golgi 2 (ERGIC2	ERGIC2	680730	0	0	0	0	0	0	0	0	0	0	0	0	0							0						36166	0	0	192580	236150	215830	2.54465e-05			3.71368e-05	4.7379e-05	4.19734e-05	1000
62	ENSGALP00000000626	MRC2	ENSGALP00000000626	62	62	13552	ENSGALP00000011629	ATPase, H+ transporting, lysosomal 13kDa, V1 subunit G1	ATP6V1G1	1092700	0	0	0	0	0	0	0	0	0	0	0	0	0							0						141420	0	0	236030	160680	554520	9.95033e-05			4.55157e-05	3.22374e-05	0.00010784	1000
690	ENSGALP00000012057	COX15	ENSGALP00000012057	690	690	67418	ENSGALP00000011635	Syntaxin binding protein 1	STXBP1	1041000	0	0	0	0	0	0	0	0	0	0	0	0	0							0						34602	17824	126030	172940	304240	385400	2.4346e-05	1.14691e-05	6.27857e-05	3.33495e-05	6.10399e-05	7.49503e-05	1000
1616	ENSGALP00000038688	NAALADL2	ENSGALP00000038688	1616	1616	110140	ENSGALP00000011666	Kinesin family member 5B	KIF5B	19618	0	0	0	0	0	0	0	0	0	0	0	0	0							0						0	9508.3	0	0	10109	0		6.11823e-06			2.02818e-06		1000
1826	REV__ENSGALP00000003481	REV__ENSGALP00000003481	REV__ENSGALP00000003481	1826	1826	55786	ENSGALP00000011689	Prolyl 4-hydroxylase, beta polypeptide	P4HB	28827000	0	0	0	0	0	0	0	0	0	0	0	0	0							0						1924700	1499400	2635100	7521500	7876700	7370000	0.00135422	0.000964807	0.00131276	0.00145043	0.00158031	0.00143327	1000
1307	ENSGALP00000024868	RAB2A	ENSGALP00000024868	1307	1307	34578	ENSGALP00000011717	Ribosomal protein, large, P0	RPLP0	12485000	0	0	0	0	0	0	0	0	0	0	0	0	0							0						1191500	722590	1542900	3267700	3342100	2418100	0.000838341	0.000464959	0.000768643	0.000630138	0.000670528	0.000470258	1000
1141	ENSGALP00000021251	BCL2L13	ENSGALP00000021251	1141	1141	43466	ENSGALP00000011718	Small nuclear ribonucleoprotein polypeptides B and B1	SNRPB	204470	0	0	0	0	0	0	0	0	0	0	0	0	0							0						45133	14194	49845	67763	27537	0	3.17557e-05	9.1333e-06	2.48318e-05	1.30673e-05	5.52477e-06		1000
1094	ENSGALP00000020045	L2HGDH	ENSGALP00000020045	1094	1094	100620	ENSGALP00000011770	Heat shock 70kDa protein 4	HSPA4	36270	0	0	0	0	0	0	0	0	0	0	0	0	0							0						0	0	0	0	7398.1	28872					1.48429e-06	5.61486e-06	1000
1709	ENSGALP00000041464	LAMTOR1	ENSGALP00000041464	1709	1709	29413	ENSGALP00000011785	Synaptoporin (SYNPR	SYNPR	1239300	0	0	0	0	0	0	0	0	0	0	0	0	0							0						157740	192240	105920	231550	317090	234810	0.000110986	0.000123699	5.27673e-05	4.46518e-05	6.3618e-05	4.56645e-05	1000
720	ENSGALP00000012682	DNAJA3	ENSGALP00000012682	720	720	33260	ENSGALP00000011804	Pyrroline-5-carboxylate reductase 1	PYCR1	259850	0	0	0	0	0	0	0	0	0	0	0	0	0							0						0	19351	55833	61677	122990	0		1.24516e-05	2.78149e-05	1.18937e-05	2.46756e-05		1000
1412	ENSGALP00000027209	PCCA	ENSGALP00000027209	1412	1412	45577	ENSGALP00000011822	Proteasome (prosome, macropain) 26S subunit, non-ATPase, 6	PSMD6	124270	0	0	0	0	0	0	0	0	0	0	0	0	0							0						0	0	0	60057	22221	41989				1.15813e-05	4.45822e-06	8.16578e-06	1000
555	ENSGALP00000009665	COPB1	ENSGALP00000009665	555	555	66658	ENSGALP00000011843	Catenin (cadherin-associated protein), delta 1	CTNND1	788090	0	0	0	0	0	0	0	0	0	0	0	0	0							0						65628	6316.3	76271	194240	324730	120900	4.6176e-05	4.0643e-06	3.79967e-05	3.74569e-05	6.51509e-05	2.35119e-05	1000
116	ENSGALP00000041805;ENSGALP00000001779	C4BPA;CD46	ENSGALP00000001779;ENSGALP00000041805	116	116	33878	ENSGALP00000011873	Thioredoxin-related transmembrane protein 2	TMX2	1441400	0	0	0	0	0	0	0	0	0	0	0	0	0							0						139980	4601.9	113330	410930	413970	358610	9.84902e-05	2.96115e-06	5.64588e-05	7.92431e-05	8.30552e-05	6.97404e-05	1000
1235	ENSGALP00000023319	CAT	ENSGALP00000023319	1235	1235	20957	ENSGALP00000011961	Phosphatidylethanolamine binding protein 1	PEBP1	954140	0	0	0	0	0	0	0	0	0	0	0	0	0							0						38880	0	52534	278440	255630	328660	2.7356e-05		2.61714e-05	5.36939e-05	5.12873e-05	6.39159e-05	1000
728	ENSGALP00000012815	DLAT	ENSGALP00000012815	728	728	21681	ENSGALP00000011976	Myelin protein zero-like 2	MPZL2	1623100	0	0	0	0	0	0	0	0	0	0	0	0	0							0						284430	0	160330	392130	345830	440420	0.000200125		7.98733e-05	7.56178e-05	6.93842e-05	8.56503e-05	1000
1056	ENSGALP00000019095	SEC22A	ENSGALP00000019095	1056	1056	57039	ENSGALP00000012007	Archain 1	ARCN1	367610	0	0	0	0	0	0	0	0	0	0	0	0	0							0						30291	30313	47971	69686	45488	143860	2.13128e-05	1.95053e-05	2.38982e-05	1.34381e-05	9.1263e-06	2.79771e-05	1000
519	ENSGALP00000008863	TM9SF3	ENSGALP00000008863	519	519	22954	ENSGALP00000012019	RAB18, member RAS oncogene family	RAB18	8656100	0	0	0	0	0	0	0	0	0	0	0	0	0							0						649860	118730	526930	2475100	2342900	2542600	0.000457243	7.63982e-05	0.000262506	0.000477295	0.000470058	0.00049447	1000
956	ENSGALP00000017080	SNW1	ENSGALP00000017080	956	956	42838	ENSGALP00000012057	Cytochrome c oxidase assembly homolog 15	COX15	859870	0	0	0	0	0	0	0	0	0	0	0	0	0							0						14882	13302	0	317210	224170	290310	1.0471e-05	8.55933e-06		6.11703e-05	4.49754e-05	5.64578e-05	1000
834	ENSGALP00000014747	HMGB3	ENSGALP00000014747	834	834	43047	ENSGALP00000012079	Protein tyrosine phosphatase-like A domain containing 1	PTPLAD1	5939300	0	0	0	0	0	0	0	0	0	0	0	0	0							0						386240	212970	535750	1624600	1734200	1445600	0.000271759	0.000137038	0.0002669	0.000313285	0.000347934	0.000281132	1000
1144	ENSGALP00000021303;ENSGALP00000042368	AKR1B1	ENSGALP00000021303;ENSGALP00000042368	1144	1144	45908	ENSGALP00000012086	Glutamic-oxaloacetic transaminase 1, soluble	GOT1	100390	0	0	0	0	0	0	0	0	0	0	0	0	0							0						0	0	0	45834	54558	0				8.83856e-06	1.0946e-05		1000
1055	ENSGALP00000019087	PDIA5	ENSGALP00000019087	1055	1055	99174	ENSGALP00000012087	Transferrin receptor	TFRC	404280	0	0	0	0	0	0	0	0	0	0	0	0	0							0						40185	0	31595	123450	152230	56814	2.82742e-05		1.574e-05	2.38059e-05	3.0542e-05	1.10489e-05	1000
183	ENSGALP00000002990	MYO7B	ENSGALP00000002990	86;183	183	76510	ENSGALP00000012090	Zinc finger protein 185 (LIM domain)	ZNF185	55943	0	0	0	0	0	0	0	0	0	15180	0	8448.9	0			0.000153801		0.000194861		2	0.000174331	2.90341e-05	1.18531e-05	0.00141736	0.000252763	0	0	0	0	0	32314						6.28424e-06	1000	0.00359613
843	ENSGALP00000014980	MND1	ENSGALP00000014980	843	843	39621	ENSGALP00000012126	Guanine nucleotide binding protein (G protein), alpha S	GNAS	1970000	0	0	0	0	0	0	0	0	0	0	0	0	0							0						34468	54511	63299	467680	594380	755640	2.42517e-05	3.50758e-05	3.15343e-05	9.01867e-05	0.000119251	0.000146952	1000
1315	ENSGALP00000024991	WFS1	ENSGALP00000024991	1315	1315	61494	ENSGALP00000012134	Integrin alpha FG-GAP repeat containing 3	ITFG3	418310	0	0	0	0	0	0	0	0	0	0	0	0	0							0						18458	16467	40060	80974	113410	148950	1.29871e-05	1.05959e-05	1.99571e-05	1.56149e-05	2.27535e-05	2.89669e-05	1000
46	ENSGALP00000000373	DPAGT1	ENSGALP00000000373	46	46	54457	ENSGALP00000012144	Acyl-CoA binding domain containing 5	ACBD5	404050	0	0	0	0	0	0	0	0	0	0	0	0	0							0						0	15177	213660	42096	45499	87616		9.76582e-06	0.000106441	8.11773e-06	9.1285e-06	1.7039e-05	1000
433	ENSGALP00000007267	LRRC8A	ENSGALP00000007267	433	433	80094	ENSGALP00000012145	Structure specific recognition protein 1	SSRP1	278370	0	0	0	0	0	0	0	0	0	0	0	0	0							0						29161	0	23040	67111	85276	73779	2.05177e-05		1.14781e-05	1.29416e-05	1.7109e-05	1.43481e-05	1000
1375	ENSGALP00000026290	AGPAT5	ENSGALP00000026290	1375	1375	37281	ENSGALP00000012180	Syntaxin 16	STX16	531570	0	0	0	0	0	0	0	0	0	0	0	0	0							0						26282	0	64523	166960	94965	178840	1.84921e-05		3.21441e-05	3.21963e-05	1.90529e-05	3.47798e-05	1000
889	ENSGALP00000015675	EMC7	ENSGALP00000015675	889	889	26285	ENSGALP00000012193	VAMP (vesicle-associated membrane protein)-associated protein B and C	VAPB	2847500	0	0	0	0	0	0	0	0	0	0	0	0	0							0						0	779330	0	666790	761850	639550		0.000501469		0.000128583	0.000152851	0.000124376	1000
45	ENSGALP00000000333	MAN2A1	ENSGALP00000000333	45	45	21846	ENSGALP00000012201	RAB22A, member RAS oncogene family	RAB22A	193480	0	0	0	0	0	0	0	0	0	0	0	0	0							0						0	0	0	114930	78550	0				2.21629e-05	1.57596e-05		1000
745	ENSGALP00000013029	SF3B1	ENSGALP00000013029	745	745	34331	ENSGALP00000012245	Forty-two-three domain containing 1 (FYTTD1	FYTTD1	458470	0	0	0	0	0	0	0	0	0	0	0	0	0							0						0	0	0	147410	137660	173400				2.84263e-05	2.76188e-05	3.37218e-05	1000
1316	ENSGALP00000025032	SORCS2	ENSGALP00000025032	1316	1316	57951	ENSGALP00000012246	Dihydropyrimidinase-like 3	DPYSL3	127160	0	0	0	0	0	0	0	0	0	0	0	0	0							0						0	0	15284	34949	32413	44517			7.61419e-06	6.73951e-06	6.50305e-06	8.65741e-06	1000
510	ENSGALP00000008645	SELK	ENSGALP00000008645	510	510	15740	ENSGALP00000012293	Ribosomal protein L35a	RPL35A	446430	0	0	0	0	0	0	0	0	0	0	0	0	0							0						0	0	81241	0	0	365190			4.04727e-05			7.102e-05	1000
1217	ENSGALP00000023081	SUPT5H	ENSGALP00000023081	1217	1217	61565	ENSGALP00000012301	Mahogunin ring finger 1, E3 ubiquitin protein ligase	MGRN1	26305	0	0	0	0	0	0	0	0	0	0	0	0	0							0						0	0	0	0	0	26305						5.11564e-06	1000
1523	ENSGALP00000034620	ND4L	ENSGALP00000034620	1523	1523	35366	ENSGALP00000012344	Heme oxygenase (decycling) 2	HMOX2	4534300	0	0	0	0	0	0	0	0	0	0	0	0	0							0						221020	120590	432350	1411200	1396100	953050	0.00015551	7.75951e-05	0.000215388	0.000272134	0.000280101	0.000185344	1000
1380	ENSGALP00000026327	ACOT9	ENSGALP00000026327	1380	1380	190920	ENSGALP00000012361	Myosin IIIA	MYO3A	19300	0	0	0	0	0	0	0	0	0	19300	0	0	0			0.000195544				1	0.000195544			0.00158982	#VALUE!	0	0	0	0	0	0							1000	0.00158982
198	ENSGALP00000003149	TMEM259	ENSGALP00000003149	198	198	88268	ENSGALP00000012405	Proteasome (prosome, macropain) 26S subunit, non-ATPase, 1	PSMD1	173970	0	0	0	0	0	0	0	0	0	0	0	0	0							0						24056	25007	33159	44390	47354	0	1.69258e-05	1.60911e-05	1.65192e-05	8.5601e-06	9.50067e-06		1000
835	ENSGALP00000014752	NDUFB5	ENSGALP00000014752	835	835	38677	ENSGALP00000012427	Leucine rich repeat containing 59	LRRC59	4773500	0	0	0	0	0	0	0	0	0	0	0	0	0							0						239510	75522	290110	959830	1644500	1564100	0.00016852	4.85955e-05	0.000144527	0.000185092	0.000329937	0.000304177	1000
1360	ENSGALP00000026015	RPLP1	ENSGALP00000026015	1360	1360	13712	ENSGALP00000012462	Ribosomal protein S25	RPS25	15664000	0	0	0	0	0	0	0	0	0	0	0	0	0							0						590400	1483500	1216900	4571700	4187900	3613400	0.000415406	0.000954576	0.000606236	0.0008816	0.000840222	0.000702713	1000
1548	ENSGALP00000036002	RAB10	ENSGALP00000036002	1548	1548	75399	ENSGALP00000012472	Nucleolin	NCL	2321900	0	0	0	0	0	0	0	0	0	0	0	0	0							0						87649	55738	84950	632510	742330	718730	6.167e-05	3.58653e-05	4.23204e-05	0.000121972	0.000148934	0.000139774	1000
114	ENSGALP00000001750;ENSGALP00000041216	PHB	ENSGALP00000001750	114	114	46749	ENSGALP00000012481	Ribosomal protein L4	RPL4	8695800	0	0	0	0	0	0	0	40830	0	56952	0	0	0	0.000551424		0.000577026				2	0.000564225	1.81034e-05	7.39067e-06	0.0045873	0.000623077	550710	401390	1076700	1891600	2281200	2396400	0.00038748	0.000258279	0.000536391	0.000364773	0.000457679	0.000466038	1000	0.0045873
994	ENSGALP00000017934	AC012493.2	ENSGALP00000017934	994	994	32919	ENSGALP00000012529	Enoyl-CoA delta isomerase 1	ECI1	1848500	0	0	0	0	0	0	0	0	0	0	0	0	0							0						54531	32936	215270	486540	500150	559090	3.83681e-05	2.11931e-05	0.000107243	9.38236e-05	0.000100346	0.000108729	1000
738	ENSGALP00000012940	UBE2H	ENSGALP00000012940	738	738	65052	ENSGALP00000012605	Pescadillo ribosomal biogenesis factor 1	PES1	372650	0	0	0	0	0	0	0	0	0	0	0	0	0							0						144320	0	69154	0	0	159170	0.000101544		3.44512e-05			3.09545e-05	1000
249	ENSGALP00000004013;ENSGALP00000038766	TLN1;TLN2	ENSGALP00000004013	249	249	81320	ENSGALP00000012615	ATP-binding cassette, sub-family B (MDR/TAP), member 7	ABCB7	100870	0	0	0	0	0	0	0	0	0	0	0	0	0							0						0	0	19807	55411	25654	0			9.86746e-06	1.06854e-05	5.14698e-06		1000
1731	ENSGALP00000041873	CCT3	ENSGALP00000041873	1731	1731	14083	ENSGALP00000012616	Presequence translocase-associated motor 16	PAM16	754490	0	0	0	0	0	0	0	0	0	0	0	0	0							0						0	118200	0	329410	306880	0		7.60572e-05		6.35229e-05	6.15696e-05		1000
1728	ENSGALP00000041842	SIRT2	ENSGALP00000041842	1728	1728	63843	ENSGALP00000012630	Breast carcinoma amplified sequence 1	BCAS1	158110	0	0	0	0	0	0	0	0	0	0	0	0	0							0						13038	0	16214	42178	41160	45520	9.17356e-06		8.0775e-06	8.13354e-06	8.25797e-06	8.85246e-06	1000
1066	ENSGALP00000019258	SULT1B1	ENSGALP00000019258	1066	1066	89539	ENSGALP00000012652	HID1 domain containing	HID1	103050	0	0	0	0	0	0	0	0	0	0	0	0	0							0						13924	0	0	20988	0	68133	9.79695e-06			4.04729e-06		1.32501e-05	1000
928	ENSGALP00000016509	SMARCA2	ENSGALP00000016509	928	928	48534	ENSGALP00000012682	DnaJ (Hsp40) homolog, subfamily A, member 3	DNAJA3	317210	0	0	0	0	0	0	0	0	0	0	0	0	0							0						0	33192	71875	118550	50875	42713		2.13578e-05	3.58067e-05	2.2861e-05	1.02071e-05	8.30657e-06	1000
1540	ENSGALP00000035781	TMEM65	ENSGALP00000035781	1540	1540	32689	ENSGALP00000012689	NmrA-like family domain containing 1	NMRAL1	609460	0	0	0	0	0	0	0	0	0	0	0	0	0							0						27471	15226	0	189680	174140	202940	1.93286e-05	9.79735e-06		3.65776e-05	3.49379e-05	3.94666e-05	1000
1118	ENSGALP00000020568	COL15A1	ENSGALP00000020568	1118	1118	276260	ENSGALP00000012723	Alpha thalassemia/mental retardation syndrome X-linked	ATRX	69218	0	0	0	0	0	0	0	0	0	0	0	0	0							0						7132.3	0	7142.2	21204	17359	16380	5.0183e-06		3.5581e-06	4.08895e-06	3.48275e-06	3.18549e-06	1000
231	ENSGALP00000003717	HSPA9	ENSGALP00000003717	231	231	36776	ENSGALP00000012744	Magnesium transporter 1	MAGT1	2395100	0	0	0	0	0	0	0	0	0	0	0	0	0							0						327300	223700	136020	566400	729830	411820	0.000230289	0.000143942	6.77625e-05	0.000109224	0.000146426	8.00884e-05	1000
1841	REV__ENSGALP00000032512	REV__ENSGALP00000032512	REV__ENSGALP00000032512	1841	1841	8878.1	ENSGALP00000012747	Cytochrome c oxidase subunit VIIb	COX7B	48453000	0	0	0	0	0	0	0	0	0	0	0	0	0							0						1845000	1006300	2154000	13864000	11873000	17710000	0.00129815	0.000647516	0.00107308	0.00267351	0.00238209	0.00344414	1000
1065	ENSGALP00000019252	SYNE2	ENSGALP00000019252	1065	1065	168930	ENSGALP00000012785	Patatin-like phospholipase domain containing 6	PNPLA6	6804	0	0	0	0	0	0	0	0	0	0	0	0	0							0						0	0	0	0	6804	0					1.36509e-06		1000
959	ENSGALP00000017179	TXNDC12	ENSGALP00000017179	959	959	66522	ENSGALP00000012815	Dihydrolipoamide S-acetyltransferase	DLAT	2442600	0	0	0	0	0	0	0	0	0	0	0	0	0							0						145840	61101	120450	638960	769200	707020	0.000102613	3.93162e-05	6.00058e-05	0.000123216	0.000154325	0.000137497	1000
1297	ENSGALP00000024724	PIGG	ENSGALP00000024724	1297	1297	168510	ENSGALP00000012817	Laminin, beta 1	LAMB1	404970	0	0	0	0	0	0	0	0	0	0	0	0	0							0						34552	39745	32555	90178	130050	77891	2.43108e-05	2.55744e-05	1.62183e-05	1.73898e-05	2.6092e-05	1.51478e-05	1000
1494	ENSGALP00000033089	NDUFA10	ENSGALP00000033089	1494	1494	18430	ENSGALP00000012854	ATP synthase, H+ transporting, mitochondrial Fo complex, subunit d	ATP5H	81324000	0	0	0	0	0	0	0	0	0	0	0	0	0							0						6213600	6173300	8266400	19118000	19614000	21939000	0.0043719	0.00397228	0.00411816	0.00368669	0.00393517	0.00426657	1000
394;624	ENSGALP00000006578;ENSGALP00000010888;ENSGALP00000043305	YWHAB;YWHAH	ENSGALP00000006578;ENSGALP00000043305;ENSGALP00000010888	394;624;1449;1550;1629	394;624	53974	ENSGALP00000012869	Dihydrolipoamide dehydrogenase	DLD	1114500	0	0	0	0	0	0	0	0	0	0	0	0	0							0						119860	162050	208540	162570	188870	272610	8.43337e-05	0.000104273	0.000103891	3.13498e-05	3.78931e-05	5.30156e-05	1000
463	ENSGALP00000007825	TOM1L2	ENSGALP00000007825	463	463	86953	ENSGALP00000012877	Polyribonucleotide nucleotidyltransferase 1	PNPT1	151220	0	0	0	0	0	0	0	0	0	0	0	0	0							0						0	0	0	0	151220	0					3.03394e-05		1000
844	ENSGALP00000015000;ENSGALP00000038037	PARP1	ENSGALP00000015000;ENSGALP00000038037	844	844	44666	ENSGALP00000012878	Phosphoglycerate kinase 1	PGK1	1318000	47449	0	0	0	0	0	1	0	0	0	0	0	0							0						136210	63885	123290	263320	318430	365450	9.58376e-05	4.11076e-05	6.14207e-05	5.07782e-05	6.38869e-05	7.10706e-05	1000
177	ENSGALP00000002874	B3GALT6	ENSGALP00000002874	177	177	59346	ENSGALP00000012907	Plexin domain containing 2	PLXDC2	148400	0	0	0	0	0	0	0	0	0	0	0	0	0							0						0	0	0	63630	39119	45646				1.22703e-05	7.84848e-06	8.87697e-06	1000
744	ENSGALP00000013022	TMEM209	ENSGALP00000013022	744	744	104710	ENSGALP00000012920	Post-GPI attachment to proteins 1	PGAP1	89104	0	0	0	0	0	0	0	0	0	0	0	0	0							0						21105	0	26406	14252	18089	9251.3	1.48495e-05		1.3155e-05	2.74833e-06	3.62921e-06	1.79914e-06	1000
412	ENSGALP00000006909	COL18A1	ENSGALP00000006909	412	412	69272	ENSGALP00000012921	ALG9, alpha-1,2-mannosyltransferase	ALG9	947810	0	0	0	0	0	0	0	0	0	0	0	0	0							0						24723	0	70487	178040	296110	378450	1.73951e-05		3.51152e-05	3.4333e-05	5.94088e-05	7.35987e-05	1000
1554	ENSGALP00000036341	BASP1	ENSGALP00000036341	1554	1554	20655	ENSGALP00000012940	Ubiquitin-conjugating enzyme E2H (UBE2H	UBE2H	1111700	0	0	0	0	0	0	0	0	0	0	0	0	0							0						0	0	0	166050	315800	629870				3.20208e-05	6.33592e-05	0.000122493	1000
501	ENSGALP00000008454	LMF1	ENSGALP00000008454	501	501	36770	ENSGALP00000012944	Ceroid-lipofuscinosis, neuronal 6, late infantile, variant	CLN6	1801400	0	0	0	0	0	0	0	0	0	0	0	0	0							0						101640	37110	69480	413750	637680	541770	7.15141e-05	2.38789e-05	3.46136e-05	7.97869e-05	0.000127938	0.00010536	1000
784	ENSGALP00000016102;ENSGALP00000013722;ENSGALP00000037818	Q5ZLB7;SMARCA1;SMARCA5	ENSGALP00000013722;ENSGALP00000016102	784	784	117500	ENSGALP00000012982	Integrin, alpha 11	ITGA11	18296	0	0	0	0	0	0	0	0	0	0	0	0	0							0						6670.7	0	0	11626	0	0	4.69352e-06			2.24194e-06			1000
1774	ENSGALP00000042610	ATP5D	ENSGALP00000042610	1774	1774	27765	ENSGALP00000012985	B-cell receptor-associated protein 29	BCAP29	2886000	0	0	0	0	0	0	0	0	0	0	0	0	0							0						92983	86584	105810	841900	759260	999450	6.5423e-05	5.57135e-05	5.27125e-05	0.000162351	0.000152331	0.000194367	1000
1817	ENSGALP00000043356	DCTN2	ENSGALP00000043356	1817	1817	25177	ENSGALP00000012993	Growth factor receptor-bound protein 2	GRB2	167370	0	0	0	0	0	0	0	0	0	0	0	0	0							0						0	0	0	0	37203	130170					7.46407e-06	2.53147e-05	1000
774	ENSGALP00000013527	PLBD2	ENSGALP00000013527	774	774	63103	ENSGALP00000013022	Transmembrane protein 209	TMEM209	86050	0	0	0	0	0	0	0	0	0	0	0	0	0							0						0	0	0	27946	31448	26656				5.38906e-06	6.30944e-06	5.1839e-06	1000
715	ENSGALP00000012605	PES1	ENSGALP00000012605	715	715	145720	ENSGALP00000013029	Splicing factor 3b, subunit 1, 155kDa	SF3B1	527400	0	0	0	0	0	0	0	0	0	0	0	0	0							0						10064	0	10371	153810	174820	178330	7.08105e-06		5.16663e-06	2.96605e-05	3.50743e-05	3.46806e-05	1000
373	ENSGALP00000006256	QSOX1	ENSGALP00000006256	373	373	54298	ENSGALP00000013036	Coronin 2B	CORO2B	193170	0	0	0	0	0	0	0	0	0	0	0	0	0							0						36607	0	15837	31946	36291	72488	2.57567e-05		7.88968e-06	6.16042e-06	7.28109e-06	1.4097e-05	1000
1334	ENSGALP00000025382	PMP2	ENSGALP00000025382	1334	1334	32170	ENSGALP00000013053	Acidic (leucine-rich) nuclear phosphoprotein 32 family, member A	ANP32A	3711800	0	0	0	0	0	0	0	0	0	0	0	0	0							0						388270	179460	378240	983120	1012100	770640	0.000273187	0.000115476	0.000188432	0.000189583	0.000203058	0.00014987	1000
180	ENSGALP00000002911;ENSGALP00000008251	AMY1A	ENSGALP00000002911;ENSGALP00000008251	180	180	93679	ENSGALP00000013059	Lethal giant larvae homolog 2	LLGL2	21581	0	0	0	0	0	0	0	0	0	0	0	0	0							0						4800.4	0	0	0	16780	0	3.37757e-06				3.36659e-06		1000
1603	ENSGALP00000038313	DDOST	ENSGALP00000038313	1603	1603	7412.4	ENSGALP00000013080	Ubiquinol-cytochrome c reductase, complex III subunit X	UQCR10	55634000	0	0	0	0	0	0	0	0	0	0	0	0	0							0						4192600	1994200	5393700	13110000	15277000	15667000	0.00294992	0.00128319	0.00268704	0.00252811	0.00306504	0.00304683	1000
1832	REV__ENSGALP00000010367	REV__ENSGALP00000010367	REV__ENSGALP00000010367	1832	1832	29189	ENSGALP00000013106	NADH dehydrogenase (ubiquinone) Fe-S protein 3, 30kDa (NADH-coenzyme Q reductase)	NDUFS3	33508000	0	0	0	0	0	0	0	0	0	0	0	0	0							0						2069000	1572800	2902700	9060400	8778300	9125000	0.00145575	0.00101204	0.00144607	0.00174719	0.0017612	0.00177458	1000
1111	ENSGALP00000036952;ENSGALP00000020435	PRPF40A	ENSGALP00000020435;ENSGALP00000036952	1111	1111	42645	ENSGALP00000013109	ARP1 actin-related protein 1 homolog A, centractin alpha	ACTR1A	256250	0	0	0	0	0	0	0	0	0	0	0	0	0							0						0	0	0	69799	50551	135900				1.34599e-05	1.01421e-05	2.6429e-05	1000
1614	ENSGALP00000038626	LDHA	ENSGALP00000038626	1614	1614	74505	ENSGALP00000013111	Acyl-CoA synthetase long-chain family member 4	ACSL4	721450	0	0	0	0	0	0	0	0	0	0	0	0	0							0						11263	10974	81519	115280	273130	229280	7.92467e-06	7.06135e-06	4.06112e-05	2.22304e-05	5.47983e-05	4.4589e-05	1000
276	ENSGALP00000004508	ERGIC1	ENSGALP00000004508	276	276	60972	ENSGALP00000013122	Heat shock 60kDa protein 1 (chaperonin)	HSPD1	8935900	0	0	0	0	0	0	0	0	0	0	0	0	0							0						649860	709710	773770	2093400	2403400	2305800	0.000457243	0.000456671	0.000385477	0.000403688	0.000482196	0.000448419	1000
789	ENSGALP00000013814;ENSGALP00000013815	CACNA2D1	ENSGALP00000013814;ENSGALP00000013815	789	789	37385	ENSGALP00000013151	Mesoderm specific transcript	MEST	70377	0	0	0	0	0	0	0	0	0	0	0	0	0							0						0	0	0	0	12135	58241					2.43466e-06	1.13264e-05	1000
1490	ENSGALP00000032872	C2ORF47	ENSGALP00000032872	1490	1490	35986	ENSGALP00000013156	Sideroflexin 2	SFXN2	702840	0	0	0	0	0	0	0	0	0	0	0	0	0							0						24935	46309	23063	59218	155670	393650	1.75443e-05	2.97981e-05	1.14895e-05	1.14195e-05	3.12322e-05	7.65548e-05	1000
1169	ENSGALP00000021762	CHPF2	ENSGALP00000021762	1169	1169	17979	ENSGALP00000013174	Ribosomal protein S27a	RPS27A	125040000	590560	872610	1691700	806470	0	0	4	478720	0	721100	184850	222750	579310	0.00646528		0.00730603	0.00782069	0.00513739	0.0211617	5	0.00957822	0.0065544	0.00267582			7586400	16542000	11296000	26607000	29323000	27542000	0.0053378	0.0106441	0.00562745	0.00513085	0.0058831	0.00535621	1000
1378	ENSGALP00000026316	APOO	ENSGALP00000026316	1378	1378	22307	ENSGALP00000013180_family	Family {Reticulon 4}	RTN4	10235910	0	0	0	0	0	0	0	0	0	0	0	0	0							0						210710	0	319985	3338270	3423450	2943484	0.000148256		0.00015941	0.000643747	0.00068685	0.000572432	1000
184	ENSGALP00000002995	HEXA	ENSGALP00000002995	184	184	97557	ENSGALP00000013213	Coatomer protein complex, subunit gamma 2	COPG2	25528	0	0	0	0	0	0	0	0	0	0	0	0	0							0						6171.6	0	0	0	19357	0	4.34235e-06				3.88361e-06		1000
563	ENSGALP00000009801	LMNA	ENSGALP00000009801	563	563	50713	ENSGALP00000013267	GDP dissociation inhibitor 2	GDI2	950170	0	0	0	0	0	0	0	0	0	0	0	0	0							0						51479	35534	131330	305710	240760	185360	3.62207e-05	2.28648e-05	6.5426e-05	5.89527e-05	4.83039e-05	3.60477e-05	1000
585	ENSGALP00000010207	CLCA2	ENSGALP00000010207	585	585	54838	ENSGALP00000013270	Endoplasmic reticulum lectin 1	ERLEC1	448140	0	0	0	0	0	0	0	0	0	0	0	0	0							0						17627	20183	18374	61292	176690	153980	1.24024e-05	1.2987e-05	9.15357e-06	1.18195e-05	3.54495e-05	2.99451e-05	1000
218	ENSGALP00000042511;ENSGALP00000003494;ENSGALP00000040976;ENSGALP00000025533	ATP6V0D1;ATP6V0D2	ENSGALP00000003494;ENSGALP00000040976;ENSGALP00000042511	218	218	42524	ENSGALP00000013350	Cancer susceptibility candidate 4	CASC4	3022300	0	0	0	0	0	0	0	0	0	0	0	0	0							0						162610	166090	137660	805880	781210	968830	0.000114413	0.000106873	6.85795e-05	0.000155405	0.000156735	0.000188412	1000
1039	ENSGALP00000018765	RPL14	ENSGALP00000018765	1039	1039	13569	ENSGALP00000013355	Ribosomal protein L30	RPL30	18025000	0	0	0	0	0	0	0	0	0	126870	0	0	0			0.00128542				1	0.00128542			0.0104508	#VALUE!	1832900	1774500	2920100	3617500	3097200	4656000	0.00128963	0.00114182	0.00145474	0.000697593	0.000621394	0.000905472	1000	0.0104508
1837	REV__ENSGALP00000020646	REV__ENSGALP00000020646	REV__ENSGALP00000020646	1837	1837	36014	ENSGALP00000013359	Annexin A4	ANXA4	38991000	0	0	0	0	0	0	0	0	0	0	0	0	0							0						2633200	983330	2246200	10426000	12061000	10642000	0.00185272	0.000632735	0.00111901	0.00201053	0.00241981	0.00206959	1000
358	ENSGALP00000005991	SUN1	ENSGALP00000005991	358	358	58053	ENSGALP00000013377	Aldehyde dehydrogenase 7 family, member A1	ALDH7A1	563500	0	0	0	0	0	0	0	0	0	0	0	0	0							0						21555	22054	30056	168470	124310	197050	1.51661e-05	1.41909e-05	1.49733e-05	3.24875e-05	2.49404e-05	3.83211e-05	1000
1209	ENSGALP00000022815	COX5A	ENSGALP00000022815	1209	1209	11154	ENSGALP00000013392	NADH dehydrogenase (ubiquinone) 1 beta subcomplex, 3, 12kDa	NDUFB3	19489000	0	0	0	0	0	0	0	0	0	0	0	0	0							0						1427000	1622000	1692300	4758000	4913600	5076200	0.00100404	0.0010437	0.000843071	0.000917526	0.00098582	0.00098719	1000
509	ENSGALP00000008604	MRPS22	ENSGALP00000008604	509	509	25337	ENSGALP00000013449	Transmembrane emp24 protein transport domain containing 3	TMED3	171090	0	0	0	0	0	0	0	0	0	0	0	0	0							0						0	0	0	102740	68344	0				1.98122e-05	1.37119e-05		1000
645	ENSGALP00000011213	SLC12A5	ENSGALP00000011213	331;645;1110	645	310610	ENSGALP00000013491	Inositol 1,4,5-trisphosphate receptor, type 1	ITPR1	130290	0	0	0	0	0	0	0	0	0	0	0	0	0							0						5084.8	0	9676.4	49343	39075	27106	3.57767e-06		4.82059e-06	9.51523e-06	7.83965e-06	5.27142e-06	1000
387	ENSGALP00000006414;ENSGALP00000006415	CAPZB;CAPZB2	ENSGALP00000006414;ENSGALP00000006415	387	387	22383	ENSGALP00000013501	Calcium and integrin binding 1 (calmyrin) (CIB1), transcript variant 1, mRNA.	CIB1	747870	0	0	0	0	0	0	0	0	0	0	0	0	0							0						0	0	0	178210	263360	306300				3.43657e-05	5.28381e-05	5.95674e-05	1000
42	ENSGALP00000000275	MCC	ENSGALP00000000275	42	42	33325	ENSGALP00000013516	N-ethylmaleimide-sensitive factor attachment protein, beta	NAPB	421740	0	0	0	0	0	0	0	0	0	0	0	0	0							0						0	0	39006	160650	222090	0			1.9432e-05	3.09795e-05	4.45581e-05		1000
808	ENSGALP00000014191	CYP20A1	ENSGALP00000014191	808	808	21509	ENSGALP00000013517	ADP-ribosylation factor-like 8B	ARL8B	1817900	0	0	0	0	0	0	0	0	0	0	0	0	0							0						0	0	0	623090	563980	630780				0.000120156	0.000113152	0.00012267	1000
1171	ENSGALP00000021792	SCO1	ENSGALP00000021792	1171	1171	41516	ENSGALP00000013527	Phospholipase B domain containing 2	PLBD2	67943	0	0	0	0	0	0	0	0	0	0	0	0	0							0						12308	0	0	38594	0	17041	8.65993e-06			7.44241e-06		3.31403e-06	1000
1143	ENSGALP00000021301	AKR1E2	ENSGALP00000021301	1143	1143	69107	ENSGALP00000013544	Coagulation factor II (thrombin) (F2	F2	154950	0	0	0	0	0	0	0	0	0	0	0	0	0							0						0	0	0	84668	59231	11054				1.63272e-05	1.18836e-05	2.14972e-06	1000
1796	ENSGALP00000043321;ENSGALP00000042993	CERS2	ENSGALP00000042993;ENSGALP00000043321	1796	1796	129770	ENSGALP00000013553	Mannosidase, alpha, class 2A, member 2	MAN2A2	628590	0	0	0	0	0	0	0	0	0	0	0	0	0							0						20490	13028	58355	159490	200560	176670	1.44168e-05	8.38302e-06	2.90713e-05	3.07558e-05	4.02385e-05	3.43578e-05	1000
1610	ENSGALP00000038512	SFXN3	ENSGALP00000038512	304;1610	1610	56181	ENSGALP00000013574	Protein disulfide isomerase family A, member 3	PDIA3	59513000	0	0	0	0	0	0	0	0	0	0	0	0	0							0						4872200	3595100	5900000	14236000	15051000	15858000	0.00342809	0.00231331	0.00293927	0.00274525	0.0030197	0.00308397	1000
1112	ENSGALP00000020439	EIF3D	ENSGALP00000020439	1112	1112	41997	ENSGALP00000013585	Creatine kinase, mitochondrial 1A	CKMT1A	755390	0	0	0	0	0	0	0	0	0	0	0	0	0							0						52001	0	0	268940	200700	233750	3.6588e-05			5.1862e-05	4.02666e-05	4.54583e-05	1000
791	ENSGALP00000013841	MRPS25	ENSGALP00000013841	791	791	35180	ENSGALP00000013700	SEC13 homolog	SEC13	259160	0	0	0	0	0	0	0	0	0	0	0	0	0							0						0	45696	0	59762	153700	0		2.94036e-05		1.15244e-05	3.0837e-05		1000
210;759	ENSGALP00000003342;ENSGALP00000013190	AP2B1;AP1B1	ENSGALP00000003342;ENSGALP00000013190	210;759	210;759	30651	ENSGALP00000013703	Peroxisomal biogenesis factor 16	PEX16	323270	0	0	0	0	0	0	0	0	0	0	0	0	0							0						0	0	18878	81642	117870	104870			9.40465e-06	1.57437e-05	2.36484e-05	2.03945e-05	1000
327	ENSGALP00000005545	KLHL20	ENSGALP00000005545	327	327	255360	ENSGALP00000013709	Microtubule-associated protein 1A	MAP1A	12862	0	0	0	0	0	0	0	0	0	0	0	0	0							0						1855.6	0	0	6805.2	4201.2	0	1.3056e-06			1.3123e-06	8.4289e-07		1000
312	ENSGALP00000005262	FAF2	ENSGALP00000005262	312	312	15916	ENSGALP00000013710	Ribosomal protein L32	RPL32	993090	0	0	0	0	0	0	0	0	0	0	0	0	0							0						0	0	0	523260	469830	0				0.000100905	9.42624e-05		1000
1558	ENSGALP00000036506	LGALS3	ENSGALP00000036506	1558	1558	49389	ENSGALP00000013724	Adaptor-related protein complex 2, mu 1 subunit	AP2M1	621790	0	0	0	0	0	0	0	0	0	0	0	0	0							0						38395	34823	41661	151670	202040	153210	2.70148e-05	2.24073e-05	2.07547e-05	2.92478e-05	4.05355e-05	2.97954e-05	1000
737	ENSGALP00000012921	ALG9	ENSGALP00000012921	737	737	23262	ENSGALP00000013738	Rho GDP dissociation inhibitor (GDI) alpha	ARHGDIA	753000	0	0	0	0	0	0	0	0	0	0	0	0	0							0						0	0	0	330340	232760	189900				6.37023e-05	4.66988e-05	3.69306e-05	1000
1500	ENSGALP00000033627	GHITM	ENSGALP00000033627	1500	1500	61686	ENSGALP00000013761	NOP58 ribonucleoprotein	NOP58	491600	0	0	0	0	0	0	0	0	0	0	0	0	0							0						12221	0	29029	178570	174560	97216	8.59872e-06		1.44617e-05	3.44352e-05	3.50221e-05	1.8906e-05	1000
1807	ENSGALP00000043136	CS	ENSGALP00000043136	1807	1807	60632	ENSGALP00000013785	Serine peptidase inhibitor, Kunitz type 1	SPINT1	435390	0	0	0	0	0	0	0	0	0	0	0	0	0							0						0	38220	0	139870	257300	0		2.45931e-05		2.69723e-05	5.16223e-05		1000
240	ENSGALP00000003890	CYP27A1	ENSGALP00000003890	240	240	122690	ENSGALP00000013814	Calcium channel, voltage-dependent, alpha 2/delta subunit 1	CACNA2D1	81184	0	0	0	0	0	0	0	0	0	0	0	0	0							0						0	3068.9	0	34591	9315.1	34208		1.97472e-06		6.67048e-06	1.8689e-06	6.65257e-06	1000
486	ENSGALP00000008171	TPR	ENSGALP00000008171	486	486	50896	ENSGALP00000013835	ALG3, alpha-1,3- mannosyltransferase	ALG3	204560	0	0	0	0	0	0	0	0	0	0	0	0	0							0						0	0	0	90851	31509	82205				1.75196e-05	6.32168e-06	1.59867e-05	1000
856	ENSGALP00000015178	DEGS1	ENSGALP00000015178	856	856	21129	ENSGALP00000013841	Mitochondrial ribosomal protein S25	MRPS25	411470	0	0	0	0	0	0	0	0	0	0	0	0	0							0						0	0	0	111530	99911	200020				2.15073e-05	2.00452e-05	3.88987e-05	1000
1343	ENSGALP00000025582	TMEM30A	ENSGALP00000025582	1343	1343	36044	ENSGALP00000013850	C1GALT1-specific chaperone 1	C1GALT1C1	1867400	0	0	0	0	0	0	0	0	0	0	0	0	0							0						155940	44702	145020	518990	523050	479740	0.00010972	2.8764e-05	7.22461e-05	0.000100081	0.00010494	9.3297e-05	1000
793	ENSGALP00000013877	ABHD12	ENSGALP00000013877	793	793	43855	ENSGALP00000013877	Abhydrolase domain containing 12	ABHD12	5941400	0	0	0	0	0	0	0	0	0	0	0	0	0							0						181260	163420	312080	1647300	1804600	1832700	0.000127535	0.000105155	0.000155472	0.000317663	0.000362058	0.000356413	1000
385	ENSGALP00000006409	TM2D3	ENSGALP00000006409	385	385	39437	ENSGALP00000013913	Cysteine-rich with EGF-like domains 2	CRELD2	46405	0	0	0	0	0	0	0	0	0	0	0	0	0							0						0	21760	0	0	0	24645		1.40017e-05				4.79282e-06	1000
907	ENSGALP00000015992	LPGAT1	ENSGALP00000015992	907	907	46715	ENSGALP00000013946	Lysosomal-associated membrane protein 2	LAMP2	2363100	0	0	0	0	0	0	0	0	0	0	0	0	0							0						199240	226700	157430	663540	849280	266890	0.000140186	0.000145873	7.84286e-05	0.000127956	0.000170392	5.19032e-05	1000
101	ENSGALP00000001452	NONE	ENSGALP00000001452	101	101	141570	ENSGALP00000013963	Structural maintenance of chromosomes 3	SMC3	69342	0	0	0	0	0	0	0	0	0	0	0	0	0							0						0	2977.3	0	18456	22858	25051		1.91578e-06		3.55903e-06	4.58602e-06	4.87177e-06	1000
174	ENSGALP00000002834	SCNN1D	ENSGALP00000002834	174	174	49860	ENSGALP00000013964_family	Family {Tubulin, beta 4B class IVb}	TUBB4B;TUBB2A;TUBB3;TUBB5;TUBB6;TUBB8	204204833	187760	0	0	0	0	0	1	28670981	9514260	29120820	6589520	6305945	5178231	0.387212	0.351867	0.295046	0.278791	0.145437	0.189157	6	0.274585	0.0928125	0.0378905			12419705	7130370	17451972	26031260	28321920	27286220	0.00873852	0.00458812	0.00869423	0.00501983	0.00568225	0.00530646	1000
467	ENSGALP00000007945	TIMM8A	ENSGALP00000007945	467	467	24718	ENSGALP00000013968	Eukaryotic translation elongation factor 1 beta 2	EEF1B2	218380	0	0	0	0	0	0	0	0	0	0	0	0	0							0						0	0	0	69208	0	149170				1.3346e-05		2.90097e-05	1000
500	ENSGALP00000008453	DBT	ENSGALP00000008453	500	500	159620	ENSGALP00000013987	IQ motif containing GTPase activating protein 1	IQGAP1	406120	0	0	0	0	0	0	0	0	0	3049.4	0	0	0			3.08959e-05				1	3.08959e-05			0.000251192	#VALUE!	31997	7362.1	16695	111620	76704	158690	2.25131e-05	4.73723e-06	8.31712e-06	2.15246e-05	1.53892e-05	3.08611e-05	1000	0.000251192
1230	ENSGALP00000023278	GAPDH	ENSGALP00000023278	1230	1230	79594	ENSGALP00000013999	NADH dehydrogenase (ubiquinone) Fe-S protein 1, 75kDa (NADH-coenzyme Q reductase)	NDUFS1	19834000	0	0	0	0	0	0	0	0	0	0	2592.9	0	0				0.000109701			1	0.000109701			0.0008919	#VALUE!	1266100	1741300	1714900	4698000	5268100	5142800	0.00089083	0.00112046	0.00085433	0.000905955	0.00105694	0.00100014	1000	0.0008919
459	ENSGALP00000007743	NUP62	ENSGALP00000007743	459	459	115980	ENSGALP00000014004	Protein tyrosine kinase 7	PTK7	152040	0	0	0	0	0	0	0	0	0	0	0	0	0							0						0	23957	0	38849	32468	56762		1.54154e-05		7.49158e-06	6.51408e-06	1.10387e-05	1000
414	ENSGALP00000006938;ENSGALP00000006939	ANXA6	ENSGALP00000006938;ENSGALP00000006939	414;766	414	8211.6	ENSGALP00000014018	NADH dehydrogenase (ubiquinone) 1 alpha subcomplex, 1, 7.5kDa	NDUFA1	20706000	0	0	0	0	0	0	0	0	0	0	0	0	0							0						905770	587280	1082000	6298700	4703900	7128800	0.000637301	0.000377892	0.000539031	0.00121463	0.000943747	0.00138637	1000
1012	ENSGALP00000018368	EPYC	ENSGALP00000018368	1012	1012	46115	ENSGALP00000014075	Adipocyte plasma membrane associated protein	APMAP	9990400	0	0	0	0	0	0	0	0	0	0	0	0	0							0						683200	554490	1178700	2501500	2672800	2399800	0.000480701	0.000356793	0.000587205	0.000482385	0.000536246	0.000466699	1000
1786	ENSGALP00000042816	EMC6	ENSGALP00000042816	1786	1786	18400	ENSGALP00000014097	Destrin (actin depolymerizing factor)	DSTN	3991300	0	0	0	0	0	0	0	0	0	0	0	0	0							0						489520	455720	476020	855250	958150	756580	0.000344427	0.000293238	0.000237144	0.000164925	0.000192234	0.000147135	1000
234	ENSGALP00000003749	GBAS	ENSGALP00000003749	234	234	43551	ENSGALP00000014119	Eukaryotic translation initiation factor 4A2	EIF4A2	1362200	0	0	0	0	0	0	0	0	0	0	0	6248.3	4867.5					0.000144108	0.000177806	2	0.000160957	2.38282e-05	9.72784e-06	0.00130862	0.000222436	127870	71639	131170	378610	319120	322710	8.99695e-05	4.6097e-05	6.53463e-05	7.30106e-05	6.40253e-05	6.27588e-05	1000	0.00130862
653	ENSGALP00000011452	CPT1A	ENSGALP00000011452	653	653	52427	ENSGALP00000014191	Cytochrome P450, family 20, subfamily A, polypeptide 1	CYP20A1	2843300	0	0	0	0	0	0	0	0	0	0	0	0	0							0						57560	53376	143840	927680	788840	872030	4.04993e-05	3.43454e-05	7.16583e-05	0.000178892	0.000158266	0.000169587	1000
665	ENSGALP00000011541	ACOX2	ENSGALP00000011541	665	665	116220	ENSGALP00000014220	Integrin, alpha 8	ITGA8	52068	0	0	0	0	0	0	0	0	0	0	0	0	0							0						0	0	0	0	25735	26333					5.16324e-06	5.12109e-06	1000
820	ENSGALP00000014379	DNAJC10	ENSGALP00000014379	820	820	43054	ENSGALP00000014260	ARP2 actin-related protein 2 homolog	ACTR2	830830	0	0	0	0	0	0	0	0	0	0	0	0	0							0						0	0	0	346390	251390	233050				6.67973e-05	5.04366e-05	4.53222e-05	1000
78	ENSGALP00000000916;XP_417532.3	ESPN	ENSGALP00000000916;XP_417532.3	78	78	22708	ENSGALP00000014265	RAB1A, member RAS oncogene family	RAB1A	20548000	0	0	0	0	0	0	0	6893.5	0	100190	28379	0	0	9.30992e-05		0.0010151	0.00120067			3	0.000769623	0.000593188	0.000242168	0.00625724	0.00286726	914600	659680	2205800	5370700	5650700	5611000	0.000643514	0.000424479	0.00109889	0.00103568	0.0011337	0.00109119	1000	0.00625724
300	ENSGALP00000005126;ENSGALP00000042076	SUB1	ENSGALP00000005126;ENSGALP00000042076	300	300	36885	ENSGALP00000014293	Tectorin beta	TECTB	5801100	0	0	0	0	0	0	0	0	0	0	0	0	0							0						461590	321770	612890	1369500	1462100	1573300	0.000324775	0.000207047	0.00030533	0.000264092	0.000293342	0.000305966	1000
1120	ENSGALP00000020634	CKAP4	ENSGALP00000020634	1120	1120	17737	ENSGALP00000014298	Ribosomal protein L12	RPL12	23523000	0	0	0	0	0	0	0	0	0	0	0	0	0							0						2205100	1313300	2301700	5882000	6318400	5502500	0.00155151	0.000845058	0.00114666	0.00113428	0.00126767	0.00107009	1000
965	ENSGALP00000017255	SLC30A6	ENSGALP00000017255	965	965	56056	ENSGALP00000014306	Solute carrier family 1 (glutamate/neutral amino acid transporter), member 4	SLC1A4	101560	0	0	0	0	0	0	0	0	0	0	0	0	0							0						0	0	0	47059	54499	0				9.07479e-06	1.09342e-05		1000
1350	ENSGALP00000025738	DDRGK1	ENSGALP00000025738	1350	1350	57736	ENSGALP00000014308	Chaperonin containing TCP1, subunit 4 (delta)	CCT4	795280	0	0	0	0	0	0	0	0	0	0	0	0	0							0						35337	21905	88586	227330	231870	190240	2.48632e-05	1.4095e-05	4.41318e-05	4.3838e-05	4.65203e-05	3.69968e-05	1000
1135	ENSGALP00000020973	SSBP1	ENSGALP00000020973	1135	1135	46971	ENSGALP00000014317	Isocitrate dehydrogenase 1 (NADP+), soluble	IDH1	502890	0	0	0	0	0	0	0	0	0	0	0	0	0							0						0	0	18850	179900	156890	147250			9.3907e-06	3.46916e-05	3.1477e-05	2.86363e-05	1000
1622	ENSGALP00000038925	LMAN1	ENSGALP00000038925	1622	1622	13448	ENSGALP00000014321	NADH dehydrogenase (ubiquinone) 1 alpha subcomplex, 5	NDUFA5	14681000	0	0	0	0	0	0	0	0	0	0	0	0	0							0						851820	1032200	602500	3947300	3877800	4369400	0.000599342	0.000664181	0.000300154	0.000761191	0.000778006	0.000849735	1000
1356	ENSGALP00000025924	EIF3H	ENSGALP00000025924	1356	1356	52036	ENSGALP00000014341	ATPase, H+ transporting, lysosomal accessory protein 1	ATP6AP1	575890	0	0	0	0	0	0	0	0	0	0	0	0	0							0						17212	0	0	73284	316970	168420	1.21104e-05			1.4132e-05	6.3594e-05	3.27533e-05	1000
1029	ENSGALP00000018671	STT3B	ENSGALP00000018671	108;1029	1029	36543	ENSGALP00000014374	Malate dehydrogenase 1, NAD (soluble)	MDH1	3561200	0	0	0	0	0	0	0	0	0	0	0	0	0							0						261920	104620	234380	1081000	1123700	755660	0.000184287	6.7319e-05	0.000116764	0.000208458	0.000225449	0.000146956	1000
311	ENSGALP00000033213;ENSGALP00000005245	FMO3;Q8QH01	ENSGALP00000005245;ENSGALP00000033213	311	311	91494	ENSGALP00000014379	DnaJ (Hsp40) homolog, subfamily C, member 10	DNAJC10	1079200	0	0	0	0	0	0	0	0	0	0	0	0	0							0						89630	16588	96385	217540	305440	353660	6.30638e-05	1.06737e-05	4.80171e-05	4.19501e-05	6.12807e-05	6.87777e-05	1000
1635	ENSGALP00000039371;ENSGALP00000017782	LIN7A;LIN7C	ENSGALP00000017782;ENSGALP00000039371	1635	1635	38277	ENSGALP00000014481	DnaJ (Hsp40) homolog, subfamily B, member 4	DNAJB4	1946800	0	0	0	0	0	0	0	0	0	0	0	0	0							0						102210	0	112150	641210	405860	685400	7.19151e-05		5.58709e-05	0.00012365	8.1428e-05	0.000133293	1000
1804	ENSGALP00000043114	PPIL1	ENSGALP00000043114	1804	1804	54106	ENSGALP00000014500	Ectonucleoside triphosphate diphosphohydrolase 8	ENTPD8	502160	0	0	0	0	0	0	0	0	0	0	0	0	0							0						0	0	0	241730	34315	226110				4.66148e-05	6.88465e-06	4.39726e-05	1000
1319	ENSGALP00000025089	MSH3	ENSGALP00000025089	1319	1319	80051	ENSGALP00000014529	Nexilin (F actin binding protein)	NEXN	67599	0	0	0	0	0	0	0	0	0	0	4636.7	0	0				0.000196171			1	0.000196171			0.00159492	#VALUE!	0	0	0	43327	19635	0				8.35511e-06	3.93939e-06		1000	0.00413683
130	ENSGALP00000002020	BSG	ENSGALP00000002020	130	130	34321	ENSGALP00000014571	Epithelial cell adhesion molecule	EPCAM	7152700	0	0	0	0	0	0	0	0	0	0	0	0	0							0						529760	435990	464740	2004400	2297300	1420500	0.00037274	0.000280543	0.000231524	0.000386525	0.000460909	0.000276251	1000
1255	ENSGALP00000030296;ENSGALP00000023926	MYL12A;MYL12B	ENSGALP00000023926;ENSGALP00000030296	1255;1734	1255	37530	ENSGALP00000014596	Guanine nucleotide binding protein (G protein), beta polypeptide 4	GNB4	5274600	0	0	0	0	0	0	0	0	0	0	0	0	0							0						435490	295590	582770	1385500	1353000	1222300	0.000306411	0.000190201	0.000290325	0.000267178	0.000271454	0.000237706	1000
1156	ENSGALP00000021475	SDHA	ENSGALP00000021475	1156	1156	21849	ENSGALP00000014599	Sorcin	SRI	6471900	0	0	0	0	0	0	0	0	0	0	0	0	0							0						426420	175930	754430	1556700	1838900	1719500	0.00030003	0.000113204	0.000375842	0.000300192	0.00036894	0.000334398	1000
1673	ENSGALP00000040802;ENSGALP00000001800	STRBP	ENSGALP00000040802	1673	1673	23315	ENSGALP00000014636	Synaptosomal-associated protein, 25kDa	SNAP25	2562800	0	0	0	0	0	0	0	0	0	0	0	0	0							0						68530	39192	96670	673180	756830	928370	4.82178e-05	2.52186e-05	4.81591e-05	0.000129815	0.000151843	0.000180544	1000
996	ENSGALP00000017958	CBX3	ENSGALP00000017958	996	996	44434	ENSGALP00000014651	Phosphatidylinositol glycan anchor biosynthesis, class K	PIGK	1825900	0	0	0	0	0	0	0	0	0	0	0	0	0							0						61556	0	149800	519900	560830	533870	4.33109e-05		7.46274e-05	0.000100257	0.00011252	0.000103824	1000
896	ENSGALP00000015855	HK2	ENSGALP00000015855	403;896	896	63748	ENSGALP00000014656	Transmembrane protein 87A	TMEM87A	931460	0	0	0	0	0	0	0	0	0	0	0	0	0							0						10445	0	25931	331470	307330	256290	7.34912e-06		1.29183e-05	6.39202e-05	6.16599e-05	4.98418e-05	1000
1153	ENSGALP00000021425	PLXNB2	ENSGALP00000021425	1153	1153	133520	ENSGALP00000014662	Jagged 1	JAG1	61161	0	0	0	0	0	0	0	0	0	0	0	0	0							0						0	0	0	0	31250	29911					6.26971e-06	5.81692e-06	1000
521	ENSGALP00000008889	ST6GAL1	ENSGALP00000008889	521	521	44448	ENSGALP00000014726	Lysocardiolipin acyltransferase 1	LCLAT1	383270	0	0	0	0	0	0	0	0	0	0	0	0	0							0						0	0	0	90749	118940	173580				1.74999e-05	2.3863e-05	3.37568e-05	1000
1566	ENSGALP00000036922;ENSGALP00000007901	SLC12A1;SLC12A2	ENSGALP00000036922	1566	1566	12137	ENSGALP00000014746	Heat shock 10 kDa protein 1 (chaperonin 10)	HSPE1	9579000	0	0	0	0	0	0	0	0	0	0	0	0	0							0						297050	217260	543100	2775900	2607700	3138000	0.000209005	0.000139799	0.000270562	0.0005353	0.000523185	0.00061026	1000
108	ENSGALP00000001483	STT3A	ENSGALP00000001483	108;1029	108	24808	ENSGALP00000014747	High mobility group box 3	HMGB3	7265000	0	0	0	0	0	0	0	0	0	0	0	0	0							0						337680	88243	263460	1992200	2245100	2338400	0.000237592	5.6781e-05	0.000131251	0.000384173	0.000450436	0.000454758	1000
1211	ENSGALP00000022870	TSPO	ENSGALP00000022870	1211	1211	21357	ENSGALP00000014752	NADH dehydrogenase (ubiquinone) 1 beta subcomplex, 5, 16kDa	NDUFB5	4784000	0	0	0	0	0	0	0	0	0	0	0	0	0							0						0	120750	342070	1571600	1423600	1326000		7.7698e-05	0.000170413	0.000303065	0.000285618	0.000257873	1000
1388	ENSGALP00000026423	MBOAT2	ENSGALP00000026423	1388	1388	76379	ENSGALP00000014758	Mannosidase, alpha, class 1B, member 1	MAN1B1	142680	0	0	0	0	0	0	0	0	0	0	0	0	0							0						0	0	0	0	92633	50044					1.8585e-05	9.73227e-06	1000
323	ENSGALP00000034775;ENSGALP00000005495	SNRNP200	ENSGALP00000005495;ENSGALP00000034775	323	323	60895	ENSGALP00000014768	EH-domain containing 3	EHD3	673460	0	0	0	0	0	0	0	0	0	0	0	0	0							0						26948	18401	23617	175140	209400	219960	1.89607e-05	1.18403e-05	1.17655e-05	3.37737e-05	4.20121e-05	4.27765e-05	1000
1068	ENSGALP00000019303	SACM1L	ENSGALP00000019303	1068	1068	23603	ENSGALP00000014793	Synaptosomal-associated protein, 23kDa	SNAP23	3137700	0	0	0	0	0	0	0	0	0	0	0	0	0							0						395250	182070	555970	631560	609280	763560	0.000278099	0.000117155	0.000276973	0.000121789	0.00012224	0.000148493	1000
134	ENSGALP00000002182	SDF2L1	ENSGALP00000002182	134	134	79495	ENSGALP00000014876	Nicastrin	NCSTN	2822500	0	0	0	0	0	0	0	0	0	0	0	0	0							0						185900	112420	222690	687070	787070	827310	0.0001308	7.2338e-05	0.00011094	0.000132494	0.000157911	0.00016089	1000
1557	ENSGALP00000036460	POPDC3	ENSGALP00000036460	1557	1557	27942	ENSGALP00000014878	FK506 binding protein 7	FKBP7	76003	0	0	0	0	0	0	0	0	0	0	0	0	0							0						0	0	0	0	44109	31894					8.84963e-06	6.20256e-06	1000
375	ENSGALP00000006284	HNRNPH3	ENSGALP00000006284	375	375	11413	ENSGALP00000014912	S100 calcium binding protein A11	S100A11	4654200	0	0	0	0	0	0	0	0	0	0	0	0	0							0						212780	0	0	1243700	1426200	1771500	0.000149712			0.000239833	0.00028614	0.000344511	1000
1439	ENSGALP00000027982	STIM1	ENSGALP00000027982	1439	1439	46154	ENSGALP00000014921	Neutral cholesterol ester hydrolase 1	NCEH1	1242100	0	0	0	0	0	0	0	0	0	0	0	0	0							0						52813	69973	150420	274780	339880	354220	3.71593e-05	4.5025e-05	7.49363e-05	5.29882e-05	6.81904e-05	6.88866e-05	1000
952	ENSGALP00000016915	SELT	ENSGALP00000016915	952	952	23900	ENSGALP00000014980	Meiotic nuclear divisions 1 homolog	MND1	1694300	0	0	0	0	0	0	0	0	0	0	0	0	0							0						0	113740	0	0	797380	783160		7.31874e-05			0.000159979	0.000152304	1000
842	ENSGALP00000014921	NCEH1	ENSGALP00000014921	842	842	103770	ENSGALP00000015000	Poly (ADP-ribose) polymerase 1	PARP1	1321500	0	0	0	0	0	0	0	0	0	0	0	0	0							0						72914	93372	67208	381350	304610	402050	5.13024e-05	6.00813e-05	3.34817e-05	7.3539e-05	6.11142e-05	7.81883e-05	1000
1274	ENSGALP00000024265	B4GALT4	ENSGALP00000024265	1274	1274	13043	ENSGALP00000015002	ATPase, H+ transporting, lysosomal 16kDa, V0 subunit c	ATP6V0C	383510	0	0	0	0	0	0	0	0	0	0	0	0	0							0						0	0	0	0	0	383510						7.45828e-05	1000
955	ENSGALP00000017072	OTOGL	ENSGALP00000017072	955	955	70749	ENSGALP00000015016	Alkylglycerone phosphate synthase	AGPS	304220	0	0	0	0	0	0	0	0	0	0	0	0	0							0						8006.6	6926.4	12086	104190	87889	85122	5.63346e-06	4.45687e-06	6.02101e-06	2.00918e-05	1.76332e-05	1.6554e-05	1000
73	ENSGALP00000000855	CDH3	ENSGALP00000000855	72;73	73	59568	ENSGALP00000015027	Acyl-CoA binding domain containing 3	ACBD3	214480	0	0	0	0	0	0	0	0	0	0	0	0	0							0						58601	30399	0	64625	60855	0	4.12318e-05	1.95606e-05		1.24622e-05	1.22094e-05		1000
154	ENSGALP00000002420	PSMB3	ENSGALP00000002420	154	154	57121	ENSGALP00000015051	Pleiotropic regulator 1	PLRG1	96218	0	0	0	0	0	0	0	0	0	0	0	0	0							0						0	7372.9	6744	27088	28154	26858		4.74418e-06	3.35973e-06	5.22361e-06	5.64856e-06	5.22319e-06	1000
1553	ENSGALP00000036326	CTNNA2	ENSGALP00000036326	237;1553	1553	30331	ENSGALP00000015059	Metaxin 2	MTX2	1852800	0	0	0	0	0	0	0	0	0	0	0	0	0							0						214600	150060	232450	364880	445390	445430	0.000150993	9.65579e-05	0.000115802	7.03629e-05	8.9359e-05	8.66246e-05	1000
591	ENSGALP00000010335	CAMLG	ENSGALP00000010335	591	591	47447	ENSGALP00000015087	KIAA1715	KIAA1715	854740	0	0	0	0	0	0	0	0	0	0	0	0	0							0						46484	0	49087	258000	275330	225840	3.27062e-05		2.44542e-05	4.97523e-05	5.52397e-05	4.392e-05	1000
214	ENSGALP00000003418	SCP2D1	ENSGALP00000003418	214	214	31720	ENSGALP00000015093	RNA binding protein S1, serine-rich domain	RNPS1	3200100	0	0	0	0	0	0	0	0	0	0	0	0	0							0						140310	80610	0	1016700	1002000	960480	9.87223e-05	5.18695e-05		0.000196059	0.000201032	0.000186789	1000
1182	ENSGALP00000022084	AAAS	ENSGALP00000022084	1182	1182	53191	ENSGALP00000015099	Epoxide hydrolase 1, microsomal (xenobiotic)	EPHX1	1030500	0	0	0	0	0	0	0	0	0	0	0	0	0							0						21572	0	0	292240	453130	263600	1.51781e-05			5.63551e-05	9.09119e-05	5.12634e-05	1000
1795	ENSGALP00000042941	NONE	ENSGALP00000042941	1795	1795	73370	ENSGALP00000015128	Lamin B receptor	LBR	2410100	0	0	0	0	0	0	0	0	0	0	0	0	0							0						162370	61085	180100	491840	628010	886680	0.000114244	3.93059e-05	8.97223e-05	9.48457e-05	0.000125998	0.000172436	1000
206	ENSGALP00000003252	TIMM23	ENSGALP00000003252	206	206	163320	ENSGALP00000015176	Eukaryotic translation initiation factor 3, subunit A	EIF3A	1118900	0	0	0	0	0	0	0	0	0	0	0	0	0							0						49543	18345	55071	320200	308800	366940	3.48585e-05	1.18043e-05	2.74353e-05	6.17469e-05	6.19548e-05	7.13603e-05	1000
721	ENSGALP00000012689	NMRAL1	ENSGALP00000012689	721	721	37975	ENSGALP00000015178	Degenerative spermatocyte homolog 1, lipid desaturase	DEGS1	456960	0	0	0	0	0	0	0	0	0	0	0	0	0							0						49444	0	55019	0	170740	181760	3.47889e-05		2.74094e-05		3.42557e-05	3.53476e-05	1000
1232	ENSGALP00000023288	PABPC1	ENSGALP00000023288	360;1232	1232	96878	ENSGALP00000015182	RNA binding motif protein 25	RBM25	291920	0	0	0	0	0	0	0	0	0	0	0	0	0							0						0	0	13174	111340	106900	60511			6.56303e-06	2.14706e-05	2.14474e-05	1.17678e-05	1000
1746	ENSGALP00000042168	TMEM161A	ENSGALP00000042168	1746	1746	35416	ENSGALP00000015211	Sideroflexin 4	SFXN4	332010	0	0	0	0	0	0	0	0	0	0	0	0	0							0						11907	0	0	89456	137000	93646	8.37778e-06			1.72506e-05	2.74864e-05	1.82117e-05	1000
1565	ENSGALP00000036750;ENSGALP00000036752	CRTAP	ENSGALP00000036750;ENSGALP00000036752	1565	1565	53772	ENSGALP00000015237	Cytochrome P450, family 51, subfamily A, polypeptide 1 (CYP51A1	CYP51A1	517080	0	0	0	0	0	0	0	0	0	0	0	0	0							0						0	0	74017	189100	71479	182490			3.68738e-05	3.64658e-05	1.43409e-05	3.54896e-05	1000
1721	ENSGALP00000041725	SCAMP3	ENSGALP00000041725	1721	1721	27979	ENSGALP00000015246	Peroxiredoxin 3	PRDX3	4970100	0	0	0	0	0	0	0	0	0	0	0	0	0							0						356000	263000	562140	1320700	1256100	1212200	0.000250482	0.00016923	0.000280047	0.000254682	0.000252012	0.000235742	1000
781	ENSGALP00000013703	PEX16	ENSGALP00000013703	781	781	111970	ENSGALP00000015257	Ribosome binding protein 1 homolog 180 kDa	RRBP1	490090	0	0	0	0	0	0	0	0	0	0	0	0	0							0						20872	11986	20947	160230	172840	103220	1.46856e-05	7.71253e-06	1.04354e-05	3.08985e-05	3.4677e-05	2.00736e-05	1000
1407	ENSGALP00000027119	LAMP1	ENSGALP00000027119	1407	1407	45965	ENSGALP00000015260	SEC62 homolog	SEC62	1813600	0	0	0	0	0	0	0	0	0	0	0	0	0							0						164060	211480	0	272310	245830	919900	0.000115433	0.000136079		5.25118e-05	4.93211e-05	0.000178897	1000
776	ENSGALP00000013553	MAN2A2	ENSGALP00000013553	776	776	32844	ENSGALP00000015277	Capping protein, alpha 2	CAPZA2	598870	0	0	0	0	0	0	0	0	0	0	0	0	0							0						62505	40438	0	158290	150560	187070	4.39786e-05	2.60203e-05		3.05244e-05	3.0207e-05	3.63803e-05	1000
1226	ENSGALP00000023262	TAPBPL	ENSGALP00000023262	1226	1226	224200	ENSGALP00000015343	Melanoma inhibitory activity family, member 3	MIA3	179460	0	0	0	0	0	0	0	0	0	0	0	0	0							0						8086.2	21404	0	63789	54886	31295	5.68946e-06	1.37727e-05		1.2301e-05	1.10118e-05	6.08607e-06	1000
420	ENSGALP00000007003	CCPG1	ENSGALP00000007003	420	420	32191	ENSGALP00000015352	Solute carrier family 39 (zinc transporter), member 9 (SLC39A9	SLC39A9	346470	0	0	0	0	0	0	0	0	0	0	0	0	0							0						0	0	0	75625	71658	199180				1.45834e-05	1.43768e-05	3.87354e-05	1000
316;1013	ENSGALP00000005302;ENSGALP00000018371	RAB5C;RAB5A	ENSGALP00000005302;ENSGALP00000018371	316;1013;1730	316;1013	53164	ENSGALP00000015356	Electron-transferring-flavoprotein dehydrogenase	ETFDH	7029800	0	0	0	0	0	0	0	0	0	0	0	0	0							0						285490	207430	317610	2052200	2511100	1656000	0.000200871	0.000133473	0.000158227	0.000395743	0.000503804	0.000322049	1000
1170	ENSGALP00000021774	NCLN	ENSGALP00000021774	1170	1170	38680	ENSGALP00000015369	Mitochondrial amidoxime reducing component 2-like	MARC2L_	4925600	0	0	0	0	0	0	0	0	0	0	0	0	0							0						446630	133220	389200	1271400	1106500	1578700	0.00031425	8.5722e-05	0.000193892	0.000245175	0.000221998	0.000307016	1000
445	ENSGALP00000007558	TMEM11	ENSGALP00000007558	445	445	57970	ENSGALP00000015394	Golgi integral membrane protein 4	GOLIM4	1524200	0	0	0	0	0	0	0	0	0	0	0	0	0							0						60838	45463	29146	398070	476780	513940	4.28057e-05	2.92537e-05	1.452e-05	7.67632e-05	9.56568e-05	9.99481e-05	1000
1088	ENSGALP00000019832;ENSGALP00000010150	ACTR3;ACTR3B	ENSGALP00000019832	1088	1088	101490	ENSGALP00000015410	Actinin, alpha 1	ACTN1	1900400	13042	0	0	0	0	0	1	27297	0	52612	17729	16829	2977.6	0.000368656		0.000533054	0.000750084	0.000388135	0.000108769	5	0.00042974	0.000235467	9.61289e-05			95289	59760	116990	499360	544070	454490	6.70455e-05	3.84533e-05	5.82821e-05	9.62958e-05	0.000109157	8.83866e-05	1000
258	ENSGALP00000004217	BRD3	ENSGALP00000004217	258	258	90697	ENSGALP00000015455	Patatin-like phospholipase domain containing 8	PNPLA8	50608	0	0	0	0	0	0	0	0	0	0	0	0	0							0						0	0	0	18871	12374	19363				3.63906e-06	2.48261e-06	3.7656e-06	1000
133	ENSGALP00000002086	HSD11B1	ENSGALP00000002086	133	133	146350	ENSGALP00000015476	Neuronal cell adhesion molecule	NRCAM	297030	0	0	0	0	0	0	0	0	0	0	0	0	0							0						15809	8197.8	12963	91056	59494	109510	1.11232e-05	5.27497e-06	6.45791e-06	1.75591e-05	1.19363e-05	2.12969e-05	1000
1213	ENSGALP00000022999	SLC30A9	ENSGALP00000022999	1213	1213	26807	ENSGALP00000015493	Vesicle transport through interaction with t-SNAREs 1B	VTI1B	1067200	0	0	0	0	0	0	0	0	0	0	0	0	0							0						48930	101160	108840	247720	383050	177510	3.44272e-05	6.50926e-05	5.4222e-05	4.777e-05	7.68516e-05	3.45211e-05	1000
969	ENSGALP00000017297	ENPP6	ENSGALP00000017297	969	969	41072	ENSGALP00000015507	Protein phosphatase, Mg2+/Mn2+ dependent, 1L	PPM1L	211830	0	0	0	0	0	0	0	0	0	0	0	0	0							0						0	0	0	0	71823	140010					1.44099e-05	2.72283e-05	1000
546	ENSGALP00000009511	RPL5	ENSGALP00000009511	546	546	36068	ENSGALP00000015508	Retinol dehydrogenase 12 (all-trans/9-cis/11-cis)	RDH12	10270000	0	0	0	0	0	0	0	0	0	0	0	0	0							0						783040	831140	1192500	2371500	2615200	2476300	0.000550948	0.000534807	0.00059408	0.000457316	0.00052469	0.000481576	1000
694	ENSGALP00000012090	ZNF185	ENSGALP00000012090	694	694	74750	ENSGALP00000015517	Solute carrier family 25 (aspartate/glutamate carrier), member 13	SLC25A13	13943000	0	0	0	0	0	0	0	4278.8	0	21523	0	0	0	5.77867e-05		0.000218066				2	0.000137927	0.000113335	4.62688e-05	0.00112138	0.000668641	804140	419950	1034300	3957700	4198800	3502000	0.000565794	0.000270222	0.000515268	0.000763197	0.000842409	0.000681049	1000	0.00112138
1514	ENSGALP00000034260;ENSGALP00000040835;ENSGALP00000008111	PTGS1;PTGS2	ENSGALP00000034260	1514	1514	77359	ENSGALP00000015519	Solute carrier family 25 (aspartate/glutamate carrier), member 12	SLC25A12	1681700	0	0	0	0	0	0	0	0	0	0	0	0	0							0						57123	33739	66315	539340	478770	506440	4.01918e-05	2.17098e-05	3.30368e-05	0.000104006	9.6056e-05	9.84895e-05	1000
424	ENSGALP00000007047	RAB27A	ENSGALP00000007047	424	424	68187	ENSGALP00000015531	Dynein, cytoplasmic 1, intermediate chain 2	DYNC1I2	56522	0	0	0	0	0	0	0	0	0	0	0	0	0							0						0	0	22685	33838	0	0			1.13012e-05	6.52527e-06			1000
567	ENSGALP00000009858	ZC3H18	ENSGALP00000009858	567	567	111980	ENSGALP00000015565	Isoleucyl-tRNA synthetase 2, mitochondrial	IARS2	68668	0	0	0	0	0	0	0	0	0	0	0	0	0							0						12933	11588	11783	0	29868	2496.1	9.09968e-06	7.45644e-06	5.87006e-06		5.99244e-06	4.85427e-07	1000
1006	ENSGALP00000018212	HNRNPD	ENSGALP00000018212	1006	1006	28236	ENSGALP00000015572	ATPase, H+ transporting, lysosomal 34kDa, V1 subunit D	ATP6V1D	1463500	0	0	0	0	0	0	0	0	0	0	0	0	0							0						26545	52087	29681	285790	706350	363000	1.86771e-05	3.3516e-05	1.47865e-05	5.51113e-05	0.000141716	7.05941e-05	1000
1409	ENSGALP00000027161	CARKD	ENSGALP00000027161	1409	1409	77034	ENSGALP00000015593	Membrane protein, palmitoylated 5 (MAGUK p55 subfamily member 5)	MPP5	105570	0	0	0	0	0	0	0	0	0	0	0	0	0							0						0	0	0	39970	51389	14214				7.70775e-06	1.03102e-05	2.76426e-06	1000
33	ENSGALP00000000088	PSMA5	ENSGALP00000000088	33	33	44282	ENSGALP00000015596	Golgi reassembly stacking protein 2, 55kDa	GORASP2	705850	0	0	0	0	0	0	0	0	0	0	0	0	0							0						0	0	50221	203400	395550	56671			2.50191e-05	3.92233e-05	7.93595e-05	1.1021e-05	1000
350	ENSGALP00000042930;ENSGALP00000005857	CLINT1	ENSGALP00000005857;ENSGALP00000042930	350	350	179860	ENSGALP00000015623	Glutamyl-prolyl-tRNA synthetase	EPRS	12998	0	0	0	0	0	0	0	0	0	0	0	0	0							0						0	0	0	0	12998	0					2.6078e-06		1000
1600	ENSGALP00000038276;ENSGALP00000007381	MYO5A;MYO5C	ENSGALP00000038276	1600	1600	28286	ENSGALP00000015626	Phosphoenolpyruvate carboxykinase 2 (mitochondrial)	PCK2	0	0	0	0	0	0	0	0	0	0	0	0	0	0							0						0	0	0	0	0	0							1000
203	ENSGALP00000003187	POR	ENSGALP00000003187	203	203	129550	ENSGALP00000015662	Thrombospondin 1	THBS1	4740700	0	0	0	0	0	0	0	0	0	0	0	0	0							0						211170	102540	241550	1089000	1433700	1662800	0.00014858	6.59806e-05	0.000120336	0.000210001	0.000287644	0.000323372	1000
1294	ENSGALP00000024710	RPL24	ENSGALP00000024710	1294	1294	26680	ENSGALP00000015675	ER membrane protein complex subunit 7	EMC7	5655600	0	0	0	0	0	0	0	0	0	0	0	0	0							0						382130	233240	452790	1766800	1312900	1507800	0.000268867	0.000150081	0.000225571	0.000340707	0.000263408	0.000293228	1000
1196	ENSGALP00000022449	PTPN2	ENSGALP00000022449	1196	1196	128920	ENSGALP00000015687	Collagen, type I, alpha 2	COL1A2	133450	0	0	0	0	0	0	0	0	0	0	0	0	0							0						0	0	12009	37132	37345	46968			5.98265e-06	7.16048e-06	7.49256e-06	9.13406e-06	1000
1655	ENSGALP00000040054	KIAA0319L	ENSGALP00000040054	1655	1655	47597	ENSGALP00000015708	Acyl-CoA dehydrogenase, short/branched chain	ACADSB	86508	0	0	0	0	0	0	0	0	0	0	0	0	0							0						0	21056	0	18164	47289	0		1.35487e-05		3.50272e-06	9.48763e-06		1000
1538	ENSGALP00000035659	GJB6	ENSGALP00000035659	1429;1538	1538	24316	ENSGALP00000015781	NADH dehydrogenase (ubiquinone) Fe-S protein 7, 20kDa (NADH-coenzyme Q reductase)	NDUFS7	7782500	0	0	0	0	0	0	0	0	0	0	0	0	0							0						287350	413270	768460	2160800	2236800	1915800	0.00020218	0.000265923	0.000382832	0.000416685	0.000448771	0.000372574	1000
1416	ENSGALP00000027247	UGGT2	ENSGALP00000027247	1416;1664	1416	50245	ENSGALP00000015788	SRC kinase signaling inhibitor 1	SRCIN1	82412	0	0	0	0	0	0	0	0	0	0	0	0	0							0						0	5850.6	0	0	40898	35663		3.76464e-06			8.2054e-06	6.93553e-06	1000
370	ENSGALP00000006210	PIGT	ENSGALP00000006210	370	370	42620	ENSGALP00000015853	Core 1 synthase, glycoprotein-N-acetylgalactosamine 3-beta-galactosyltransferase, 1	C1GALT1	1935800	0	0	0	0	0	0	0	0	0	0	0	0	0							0						19390	19699	35813	558880	662530	639440	1.36428e-05	1.26756e-05	1.78413e-05	0.000107774	0.000132924	0.000124355	1000
1700	ENSGALP00000041356	FKBP10	ENSGALP00000041356	1700	1700	102810	ENSGALP00000015855	Hexokinase 2	HK2	771410	0	0	0	0	0	0	0	0	0	0	0	0	0							0						46069	23026	46488	245560	226750	183520	3.24142e-05	1.48164e-05	2.31594e-05	4.73534e-05	4.5493e-05	3.56899e-05	1000
1732	ENSGALP00000041881	OCLN	ENSGALP00000041881	1732	1732	52528	ENSGALP00000015862	Solute carrier family 16 (monocarboxylate transporter), member 7	SLC16A7	1052200	0	0	0	0	0	0	0	0	0	0	0	0	0							0						41564	0	0	290960	279840	439810	2.92445e-05			5.61083e-05	5.61445e-05	8.55317e-05	1000
676	ENSGALP00000011666;ENSGALP00000020339	KIF5B;KIF5C	ENSGALP00000011666;ENSGALP00000020339	676	676	369660	ENSGALP00000015897	Golgin B1	GOLGB1	21091	0	0	0	0	0	0	0	0	0	0	0	0	0							0						0	0	1616.4	0	11736	7737.8			8.05259e-07		2.3546e-06	1.5048e-06	1000
974	ENSGALP00000017461	GALNT7	ENSGALP00000017461	974	974	135580	ENSGALP00000015899	Protein tyrosine phosphatase, non-receptor type 14	PTPN14	71818	0	0	0	0	0	0	0	0	0	0	0	0	0							0						0	0	0	0	0	71818						1.39667e-05	1000
612	ENSGALP00000010584	GGTLC1L	ENSGALP00000010584	612	612	41395	ENSGALP00000015953	Transmembrane protein 206	TMEM206	206810	0	0	0	0	0	0	0	0	0	0	0	0	0							0						0	0	25869	180940	0	0			1.28874e-05	3.48922e-05			1000
135	ENSGALP00000002197	GSN	ENSGALP00000002197	135	135	21208	ENSGALP00000015964	Ribosomal protein L18a	RPL18A	1962100	0	0	0	0	0	0	0	0	0	86720	0	0	0			0.000878629				1	0.000878629			0.00714348	#VALUE!	277630	180070	308130	426010	438380	245160	0.000195341	0.000115868	0.000153504	8.21511e-05	8.79526e-05	4.76773e-05	1000	0.00714348
1457	ENSGALP00000029322	RBM4B	ENSGALP00000029322	1457	1457	35307	ENSGALP00000015972	ELMO/CED-12 domain containing 2	ELMOD2	1124800	0	0	0	0	0	0	0	0	0	0	0	0	0							0						79870	105440	82655	238970	155290	462540	5.61967e-05	6.78466e-05	4.11771e-05	4.60826e-05	3.1156e-05	8.99521e-05	1000
650	ENSGALP00000011372	PITRM1	ENSGALP00000011372	650	650	174260	ENSGALP00000015978	Aquarius intron-binding spliceosomal factor	AQR	43410	0	0	0	0	0	0	0	0	0	0	0	0	0							0						0	0	0	22082	9004.9	12322				4.25826e-06	1.80666e-06	2.39631e-06	1000
167	ENSGALP00000002670	NPTN	ENSGALP00000002670	167	167	88194	ENSGALP00000015979	Peptidylprolyl isomerase G (cyclophilin G)	PPIG	354530	0	0	0	0	0	0	0	0	0	0	0	0	0							0						0	260190	11750	0	0	82595		0.000167422	5.85362e-06			1.60626e-05	1000
922	ENSGALP00000016363	HP1BP3	ENSGALP00000016363	922	922	42634	ENSGALP00000015992	Lysophosphatidylglycerol acyltransferase 1	LPGAT1	2853900	0	0	0	0	0	0	0	0	0	0	0	0	0							0						92181	68907	162810	757220	911910	860840	6.48587e-05	4.4339e-05	8.11088e-05	0.000146021	0.000182957	0.000167411	1000
1574	ENSGALP00000037366	MRPL37	ENSGALP00000037366	1574	1574	18886	ENSGALP00000016059	Mitochondrial ribosomal protein S10 (MRPS10), nuclear gene encoding mitochondrial protein, mRNA.	MRPS10	175510	0	0	0	0	0	0	0	0	0	0	0	0	0							0						28607	0	0	0	0	146900	2.01279e-05					2.85683e-05	1000
356	ENSGALP00000005983	NELL1	ENSGALP00000005983	356	356	100040	ENSGALP00000016081	Protein kinase D1	PRKD1	31556	0	0	0	0	0	0	0	0	0	0	0	0	0							0						0	0	0	15050	16506	0				2.90222e-06	3.31161e-06		1000
1027	ENSGALP00000036896;ENSGALP00000018634	TGFBR2	ENSGALP00000018634;ENSGALP00000036896	1027	1027	116690	ENSGALP00000016102	SWI/SNF related, matrix associated, actin dependent regulator of chromatin, subfamily a, member 5	SMARCA5	36280	0	0	0	0	0	0	0	0	0	0	0	0	0							0						2236.2	0	0	18635	0	15409	1.57339e-06			3.59355e-06		2.99665e-06	1000
111	ENSGALP00000001587	GGT7	ENSGALP00000001587	111	111	71367	ENSGALP00000016108	Sec1 family domain containing 1	SCFD1	390990	0	0	0	0	0	0	0	0	0	0	0	0	0							0						13627	0	0	156690	117060	103620	9.58798e-06			3.02159e-05	2.34858e-05	2.01514e-05	1000
1103	ENSGALP00000020214	NID2	ENSGALP00000020214	990;1103	1103	65851	ENSGALP00000016113	Cochlin	COCH	38286000	0	0	0	0	0	0	0	0	0	26965	5013.6	4993.8	0			0.000273204	0.000212117	0.000115174		3	0.000200165	7.96897e-05	3.25332e-05	0.00162739	0.000414233	2942400	2761100	3380300	9614300	9809500	9741600	0.00207028	0.00177666	0.001684	0.00185401	0.00196809	0.00189449	1000	0.00162739
689	ENSGALP00000012019	RAB18	ENSGALP00000012019	689	689	20825	ENSGALP00000016120_family	Family {RAP1B, member of RAS oncogene family}	RAP1B;RAP1A	6906750	0	0	0	0	0	0	0	0	0	0	0	0	0							0						397760	277242	516540	1713000	2188270	1814020	0.000279865	0.000178395	0.00025733	0.000330332	0.000439034	0.00035278	1000
1515	ENSGALP00000034433	WDR18	ENSGALP00000034433	1515	1515	49687	ENSGALP00000016151	Carboxypeptidase M precursor	CPM	103970	0	0	0	0	0	0	0	0	0	0	0	0	0							0						0	0	0	31060	72905	0				5.98956e-06	1.4627e-05		1000
1367	ENSGALP00000026130	USP9X	ENSGALP00000026130	1367	1367	16238	ENSGALP00000016177	Lysozyme	LYZ	10184000	0	146950	1341700	631700	0	0	3	85622	35717	202520	96699	1785100	1626600	0.00115636	0.00132092	0.00205189	0.00409117	0.0411706	0.0594184	6	0.0182016	0.0255414	0.0104272			454870	444430	508360	928750	971760	922740	0.000320047	0.000285974	0.000253255	0.000179099	0.000194965	0.000179449	1000
630	ENSGALP00000010956	MRPL46	ENSGALP00000010956	630	630	155630	ENSGALP00000016182	Leucine-rich pentatricopeptide repeat containing	LRPPRC	185760	0	0	0	0	0	0	0	0	0	0	0	0	0							0						25163	6647.8	24147	31663	40455	57689	1.77047e-05	4.27761e-06	1.20296e-05	6.10585e-06	8.11652e-06	1.1219e-05	1000
934	ENSGALP00000016538	CAPN11	ENSGALP00000016538	934	934	57431	ENSGALP00000016196	Chaperonin containing TCP1, subunit 2 (beta)	CCT2	909170	0	0	0	0	0	0	0	0	0	0	0	0	0							0						35568	24364	34209	280020	346580	188430	2.50257e-05	1.56773e-05	1.70423e-05	5.39986e-05	6.95346e-05	3.66448e-05	1000
619	ENSGALP00000010768	GALNT6	ENSGALP00000010768	619;987	619	23943	ENSGALP00000016307	Family with sequence similarity 177, member A1 (FAM177A1	FAM177A1	353930	0	0	0	0	0	0	0	0	0	0	0	0	0							0						0	0	0	128920	124410	100600				2.48607e-05	2.49605e-05	1.95641e-05	1000
568	ENSGALP00000042596;ENSGALP00000009873	COL6A2	ENSGALP00000009873;ENSGALP00000042596	568	568	211990	ENSGALP00000016318	Protein tyrosine phosphatase, receptor type, F	PTPRF	17345	0	0	0	0	0	0	0	0	0	0	0	0	0							0						0	0	0	7456.4	0	9888.5				1.43788e-06		1.92306e-06	1000
275	ENSGALP00000022645;ENSGALP00000004487	ZNF532	ENSGALP00000004487;ENSGALP00000022645	275	275	316670	ENSGALP00000016337	LPS-responsive vesicle trafficking, beach and anchor containing	LRBA	37751	0	0	0	0	0	0	0	0	0	0	0	0	0							0						2777.3	0	0	11556	11824	11594	1.95411e-06			2.22844e-06	2.37226e-06	2.25473e-06	1000
1640	ENSGALP00000039575;ENSGALP00000002038	GNB1	ENSGALP00000002038;ENSGALP00000039575	826;1640	1640	29867	ENSGALP00000016361	Ribosomal protein S3A	RPS3A	12512000	0	0	0	0	0	0	0	0	0	0	0	0	0							0						970000	1113800	2294600	2898300	2959200	2276400	0.000682494	0.000716688	0.00114313	0.000558904	0.000593707	0.000442701	1000
72	ENSGALP00000000853	CDH3	ENSGALP00000000853	72;73	72	61852	ENSGALP00000016363	Heterochromatin protein 1, binding protein 3	HP1BP3	2806400	0	0	0	0	0	0	0	0	0	0	0	0	0							0						290180	304890	365400	683250	523560	639080	0.000204171	0.000196185	0.000182035	0.000131757	0.000105042	0.000124285	1000
1661	ENSGALP00000040378	NONE	ENSGALP00000040378	1661	1661	112520	ENSGALP00000016394	Family with sequence similarity 160, member A1	FAM160A1	0	0	0	0	0	0	0	0	0	0	0	0	0	0							0						0	0	0	0	0	0							1000
1256	ENSGALP00000023934;ENSGALP00000006117	SRC;YES1	ENSGALP00000006117;ENSGALP00000023934	1256	1256	44682	ENSGALP00000016414	ADP-ribosylation factor interacting protein 1	ARFIP1	64144	0	0	0	0	0	0	0	0	0	0	0	0	0							0						0	11287	12714	0	40143	0		7.26275e-06	6.33387e-06		8.05392e-06		1000
925	ENSGALP00000016447	RPS8	ENSGALP00000016447	925	925	24185	ENSGALP00000016447	Ribosomal protein S8	RPS8	12723000	0	0	0	0	0	0	0	0	0	192780	75219	0	0			0.00195321	0.00318239			2	0.0025678	0.000869163	0.000354834	0.0208769	0.00572576	769260	709810	1337600	3144800	3411200	3082000	0.000541253	0.000456736	0.000666366	0.000606438	0.000684392	0.000599369	1000	0.0208769
292	ENSGALP00000004833	MRPL44	ENSGALP00000004833	292	292	65577	ENSGALP00000016464	Heparan-alpha-glucosaminide N-acetyltransferase	HGSNAT	121560	0	0	0	0	0	0	0	0	0	0	0	0	0							0						0	0	0	54369	67187	0				1.04844e-05	1.34798e-05		1000
498	ENSGALP00000008367	CACNA1H	ENSGALP00000008367	498	498	86186	ENSGALP00000016481	Sec23 homolog A	SEC23A	146020	0	0	0	0	0	0	0	0	0	0	0	0	0							0						22953	0	40607	59666	0	22791	1.61498e-05		2.02296e-05	1.15059e-05		4.43226e-06	1000
1475	ENSGALP00000031047	MANEA	ENSGALP00000031047	1475	1475	176810	ENSGALP00000016509	SWI/SNF related, matrix associated, actin dependent regulator of chromatin, subfamily a, member 2	SMARCA2	321160	0	0	0	0	0	0	0	0	0	0	0	0	0							0						0	0	10099	109950	108100	93011			5.03112e-06	2.12026e-05	2.16882e-05	1.80882e-05	1000
1711	ENSGALP00000041492;ENSGALP00000041027;ENSGALP00000042598;ENSGALP00000004867;ENSGALP00000028780;ENSGALP00000015412;ENSGALP00000008078;ENSGALP00000013714;ENSGALP00000014734;ENSGALP00000000973;ENSGALP00000018656;ENSGALP00000002654;ENSGALP00000020098	CDK1;CDK12;CDK13;CDK14;CDK15;CDK17;CDK18;CDK2;CDK3;CDK5;CDK6;CDK9	ENSGALP00000000973;ENSGALP00000002654;ENSGALP00000004867;ENSGALP00000008078;ENSGALP00000013714;ENSGALP00000014734;ENSGALP00000015412;ENSGALP00000018656;ENSGALP00000020098;ENSGALP00000028780;ENSGALP00000041027;ENSGALP00000041492;ENSGALP00000042598	1711	1711	72734	ENSGALP00000016513	Pinin, desmosome associated protein	PNN	556070	0	0	0	0	0	0	0	0	0	0	0	0	0							0						0	12871	19245	204490	81213	238250		8.282e-06	9.58748e-06	3.94335e-05	1.62938e-05	4.63335e-05	1000
334	ENSGALP00000005654;ENSGALP00000005653	FN1	ENSGALP00000005653;ENSGALP00000005654	334	334	47168	ENSGALP00000016521	Solute carrier family 35 (adenosine 3'-phospho 5'-phosphosulfate transporter), member B2	SLC35B2	179560	0	0	0	0	0	0	0	0	0	0	0	0	0							0						0	0	0	0	87813	91751					1.7618e-05	1.78432e-05	1000
1362	ENSGALP00000026092	NDRG1	ENSGALP00000026092	1362	1362	83487	ENSGALP00000016523	Heat shock protein 90kDa alpha (cytosolic), class B member 1	HSP90AB1	2504600	0	0	0	0	0	0	0	0	0	0	0	0	0							0						200250	151630	268040	608880	644930	630840	0.000140896	9.75681e-05	0.000133532	0.000117416	0.000129393	0.000122682	1000
1096	ENSGALP00000020064	EIF3L	ENSGALP00000020064	1096	1096	24734	ENSGALP00000016534	RAB21, member RAS oncogene family	RAB21	1460500	0	0	0	0	0	0	0	0	0	0	0	0	0							0						122040	54244	166160	366570	387390	364150	8.58675e-05	3.49039e-05	8.27777e-05	7.06888e-05	7.77224e-05	7.08178e-05	1000
899	ENSGALP00000015899	PTPN14	ENSGALP00000015899	899	899	94750	ENSGALP00000016536	Heat shock 70kDa protein 4-like	HSPA4L	108740	0	0	0	0	0	0	0	0	0	0	0	0	0							0						20100	6500.6	9761.1	17001	18408	36967	1.41424e-05	4.18289e-06	4.86279e-06	3.27845e-06	3.69321e-06	7.18913e-06	1000
818	ENSGALP00000014341	ATP6AP1	ENSGALP00000014341	818	818	80351	ENSGALP00000016538	Calpain 11	CAPN11	725430	0	0	0	0	0	0	0	0	0	0	0	0	0							0						60164	22324	36932	199110	203250	203640	4.23315e-05	1.43646e-05	1.83988e-05	3.83961e-05	4.07782e-05	3.96027e-05	1000
718	ENSGALP00000012630	BCAS1	ENSGALP00000012630	718	718	157350	ENSGALP00000016543	Cutaneous T-cell lymphoma-associated antigen 5	CTAGE5	255210	0	0	0	0	0	0	0	0	0	0	0	0	0							0						0	12946	8727.7	63843	60107	109590		8.33026e-06	4.34797e-06	1.23114e-05	1.20593e-05	2.13124e-05	1000
639	ENSGALP00000011138	MARCH5_	ENSGALP00000011138	639	639	50841	ENSGALP00000016557	Coenzyme Q6 monooxygenase	COQ6	75249	0	0	0	0	0	0	0	0	0	0	0	0	0							0						0	0	0	0	34889	40359					6.99981e-06	7.84878e-06	1000
1089	ENSGALP00000042528;ENSGALP00000019939	CIRBP	ENSGALP00000019939;ENSGALP00000042528	1089	1089	47960	ENSGALP00000016566	Ectonucleoside triphosphate diphosphohydrolase 5	ENTPD5	265700	0	0	0	0	0	0	0	0	0	0	0	0	0							0						39648	0	56315	57024	60470	52247	2.78964e-05		2.8055e-05	1.09964e-05	1.21321e-05	1.01607e-05	1000
1148	ENSGALP00000021367	SEC61G	ENSGALP00000021367	1148	1148	21641	ENSGALP00000016583	Progesterone receptor membrane component 2	PGRMC2	15358000	0	0	0	0	0	0	0	0	0	0	0	0	0							0						1326400	821240	1798700	3849300	3659100	3902900	0.000933257	0.000528437	0.000896077	0.000742293	0.000734128	0.000759013	1000
605	ENSGALP00000010490	GGT5	ENSGALP00000010490	605	605	58291	ENSGALP00000016585	Aldehyde dehydrogenase 6 family, member A1	ALDH6A1	1703000	0	0	0	0	0	0	0	0	0	0	0	0	0							0						33283	93084	157640	392060	524810	502160	2.3418e-05	5.9896e-05	7.85332e-05	7.56043e-05	0.000105293	9.76571e-05	1000
1163	ENSGALP00000041792;ENSGALP00000021618	LDHB	ENSGALP00000021618;ENSGALP00000041792	1163	1163	45358	ENSGALP00000016623	Nucleosome assembly protein 1-like 1	NAP1L1	2261700	0	0	0	0	0	0	0	0	0	0	0	0	0							0						146210	0	132250	955900	540710	486660	0.000102874		6.58844e-05	0.000184334	0.000108483	9.46428e-05	1000
305	ENSGALP00000005161	STAT3	ENSGALP00000005161	305	305	37092	ENSGALP00000016630	Aldo-keto reductase family 1, member A1 (aldehyde reductase)	AKR1A1	96490	0	0	0	0	0	0	0	0	0	0	0	0	0							0						0	0	11749	28635	26927	29179			5.85312e-06	5.52193e-06	5.40239e-06	5.67456e-06	1000
580	ENSGALP00000010103	KIRREL	ENSGALP00000010103	580	580	101130	ENSGALP00000016641	Oxysterol binding protein-like 8	OSBPL8	153810	0	0	0	0	0	0	0	0	0	0	0	0	0							0						6927	3274.9	10758	40947	46804	45098	4.87385e-06	2.10727e-06	5.35943e-06	7.89616e-06	9.39033e-06	8.7704e-06	1000
301	ENSGALP00000005132	DNAJA4	ENSGALP00000005132	301	301	23882	ENSGALP00000016648	Keratin 78	KRT78	32773	0	0	0	0	0	32773	1	0	0	0	0	0	0							0						0	0	0	0	0	0							1000
1510	ENSGALP00000034213	QSOX2	ENSGALP00000034213	1510	1510	35563	ENSGALP00000016689	Protein phosphatase 2, catalytic subunit, beta isozyme	PPP2CB	160730	0	0	0	0	0	0	0	0	0	0	0	0	0							0						0	0	31725	55334	73674	0			1.58048e-05	1.06705e-05	1.47813e-05		1000
478	ENSGALP00000008112	AP3M1	ENSGALP00000008112	478	478	59870	ENSGALP00000016742	Solute carrier family 33 (acetyl-CoA transporter), member 1	SLC33A1	173090	0	0	0	0	0	0	0	0	0	0	0	0	0							0						37781	0	0	135310	0	0	2.65828e-05			2.6093e-05			1000
1151	ENSGALP00000021411	GALNT1	ENSGALP00000021411	1151	1151	55611	ENSGALP00000016743	Epoxide hydrolase 1-like	EPHX1L	470220	0	0	0	0	0	0	0	0	0	0	0	0	0							0						0	0	0	192410	109820	167990				3.71041e-05	2.20333e-05	3.26697e-05	1000
1147	ENSGALP00000021353	MGST1	ENSGALP00000021353	1147	1147	24803	ENSGALP00000016780	Transmembrane emp24-like trafficking protein 10	TMED10	72018000	0	0	0	0	0	0	0	0	0	0	0	0	0							0						4490000	4963200	7519300	15881000	18004000	21161000	0.00315917	0.00319363	0.00374597	0.00306247	0.00361216	0.00411527	1000
313	ENSGALP00000005271	EIF3I	ENSGALP00000005271	313	313	47504	ENSGALP00000016781	Synaptotagmin I	SYT1	394140	0	0	0	0	0	0	0	0	0	0	0	0	0							0						22754	0	113050	116440	66656	75241	1.60098e-05		5.63193e-05	2.24541e-05	1.33733e-05	1.46324e-05	1000
1199	ENSGALP00000022493;ENSGALP00000022492	Q5ZJG4;VPS45	ENSGALP00000022492;ENSGALP00000022493	1199	1199	85339	ENSGALP00000016796	Membrane metallo-endopeptidase	MME	162130	0	0	0	0	0	0	0	0	0	0	0	0	0							0						0	0	0	67513	55474	39139				1.30191e-05	1.11298e-05	7.61152e-06	1000
29;436;779;1190	ENSGALP00000000054;ENSGALP00000007379;ENSGALP00000013640;ENSGALP00000013713;ENSGALP00000022345;ENSGALP00000041418;ENSGALP00000043257	GNAI2;GNAI1;GNAI3;GNAL;GNAT1;GNAT2;GNAT3	ENSGALP00000007379;ENSGALP00000013640;ENSGALP00000022345;ENSGALP00000000054	29;297;436;779;1190	29;436;779;1190	70133	ENSGALP00000016897	Tight junction associated protein 1 (peripheral)	TJAP1	8662.3	0	0	0	0	0	0	0	8662.3	0	0	0	0	0	0.000116987						1	0.000116987			0.000951139	#VALUE!	0	0	0	0	0	0							1000	0.000951139
185	ENSGALP00000002996	SLC25A24	ENSGALP00000002996	185	185	15876	ENSGALP00000016915	Selenoprotein T	SELT	3110100	0	0	0	0	0	0	0	0	0	0	0	0	0							0						0	0	140690	904740	1076500	988220			7.0089e-05	0.000174469	0.000215979	0.000192183	1000
1734	ENSGALP00000041913	MYL9	ENSGALP00000041913	1255;1734	1734	62196	ENSGALP00000017050	Serine palmitoyltransferase, long chain base subunit 2 (SPTLC2	SPTLC2	239780	0	0	0	0	0	0	0	0	0	0	0	0	0							0						0	0	0	68559	78027	93189				1.32208e-05	1.56546e-05	1.81229e-05	1000
1069	ENSGALP00000019335	SERHL2	ENSGALP00000019335	1069	1069	315980	ENSGALP00000017072	Otogelin-like	OTOGL	160710	0	0	0	0	0	0	0	0	0	0	0	0	0							0						7912.9	1622.5	12720	58014	45336	35104	5.56753e-06	1.04402e-06	6.33686e-06	1.11873e-05	9.0958e-06	6.82682e-06	1000
1527	ENSGALP00000034943	PNKD	ENSGALP00000034943	1527	1527	61872	ENSGALP00000017080	SNW domain containing 1	SNW1	727650	0	0	0	0	0	0	0	0	0	0	0	0	0							0						15373	11818	33599	212390	219540	234930	1.08165e-05	7.60443e-06	1.67384e-05	4.0957e-05	4.40465e-05	4.56878e-05	1000
589	ENSGALP00000010267;ENSGALP00000010266;ENSGALP00000010265	H2AFY;H2AY	ENSGALP00000010266;ENSGALP00000010267	450;589	589	16743	ENSGALP00000017119	Oligosaccharyltransferase complex subunit	OSTC	12812000	0	0	0	0	0	0	0	0	0	0	0	0	0							0						957850	598050	1239600	3318100	3757300	2941500	0.000673945	0.000384822	0.000617545	0.000639857	0.00075383	0.000572046	1000
670	ENSGALP00000011607	FADS2	ENSGALP00000011607	670	670	25997	ENSGALP00000017177	RAB3B, member RAS oncogene family	RAB3B	864320	0	0	0	0	0	0	0	0	0	0	0	0	0							0						51769	43940	106210	0	329330	333060	3.64248e-05	2.82737e-05	5.29118e-05		6.60738e-05	6.47716e-05	1000
1298	ENSGALP00000024734;ENSGALP00000029799;ENSGALP00000029798	CD47	ENSGALP00000024734;ENSGALP00000029798;ENSGALP00000029799	1298	1298	18562	ENSGALP00000017179	Thioredoxin domain containing 12 (endoplasmic reticulum)	TXNDC12	2444000	0	0	0	0	0	0	0	0	0	0	0	0	0							0						44467	0	0	838270	933350	627940	3.12871e-05			0.000161651	0.000187259	0.000122118	1000
681	ENSGALP00000011785	SYNPR	ENSGALP00000011785	681	681	17260	ENSGALP00000017180	Basic transcription factor 3-like 4	BTF3L4	1040400	0	0	0	0	0	0	0	0	0	0	0	0	0							0						0	0	111020	358030	305490	265850			5.5308e-05	6.9042e-05	6.12907e-05	5.1701e-05	1000
1798	ENSGALP00000043018	ASNA1	ENSGALP00000043018	1798	1798	88375	ENSGALP00000017201	Sel-1 suppressor of lin-12-like	SEL1L	1671600	0	0	0	0	0	0	0	0	0	0	0	0	0							0						37515	67835	169340	486770	430480	479700	2.63956e-05	4.36492e-05	8.43619e-05	9.3868e-05	8.63676e-05	9.32893e-05	1000
124	ENSGALP00000001894;ENSGALP00000036014	APP;O93296	ENSGALP00000001894;ENSGALP00000036014	124	124	76959	ENSGALP00000017218	Galactosylceramidase	GALC	62574	0	0	0	0	0	0	0	0	0	0	0	0	0							0						14887	0	0	0	0	47687	1.04745e-05					9.27389e-06	1000
365	ENSGALP00000006065	TEX264	ENSGALP00000006065	365	365	52110	ENSGALP00000017231	UFM1-specific peptidase 2	UFSP2	569120	0	0	0	0	0	0	0	0	0	0	0	0	0							0						0	0	28083	157480	207390	176170			1.39904e-05	3.03682e-05	4.16088e-05	3.42605e-05	1000
1168	ENSGALP00000021749	SF3B4	ENSGALP00000021749	1168	1168	50936	ENSGALP00000017255	Solute carrier family 30 (zinc transporter), member 6	SLC30A6	136230	0	0	0	0	0	0	0	0	0	0	0	0	0							0						0	0	0	67137	0	69096				1.29466e-05		1.34374e-05	1000
631	ENSGALP00000010958	PLOD2	ENSGALP00000010958	631	631	78561	ENSGALP00000017274	Acyl-CoA synthetase long-chain family member 1	ACSL1	458660	0	0	0	0	0	0	0	0	0	0	0	0	0							0						0	23731	39013	138580	93219	164110		1.527e-05	1.94355e-05	2.67236e-05	1.87026e-05	3.19152e-05	1000
1486	ENSGALP00000032184	ANXA1	ENSGALP00000032184	1486	1486	23541	ENSGALP00000017282	Glutathione peroxidase 7	GPX7	2221400	0	0	0	0	0	0	0	0	0	0	11280	0	0				0.000477238			1	0.000477238			0.00388007	#VALUE!	0	65513	45378	509630	852190	737450		4.21551e-05	2.26064e-05	9.82763e-05	0.000170976	0.000143415	1000	0.00388007
662	ENSGALP00000011533	FADS1	ENSGALP00000011533	662	662	50550	ENSGALP00000017297	Ectonucleotide pyrophosphatase/phosphodiesterase 6	ENPP6	348660	0	0	0	0	0	0	0	0	0	0	0	0	0							0						28476	0	33485	144380	124230	18098	2.00358e-05		1.66816e-05	2.7842e-05	2.49244e-05	3.51959e-06	1000
1756	ENSGALP00000042298	PREB	ENSGALP00000042298	1756	1756	17105	ENSGALP00000017367	Mago-nashi homolog, proliferation-associated	MAGOH	5694400	0	0	0	0	0	0	0	0	0	0	0	0	0							0						286190	106090	434080	1574400	1554000	1739600	0.000201364	6.82649e-05	0.00021625	0.000303605	0.00031178	0.000338307	1000
540	ENSGALP00000009408	ACAA1	ENSGALP00000009408	540	540	82962	ENSGALP00000017448	NDC1 transmembrane nucleoporin	NDC1	108230	0	0	0	0	0	0	0	0	0	0	0	0	0							0						6026.4	0	0	79257	22942	0	4.24018e-06			1.52838e-05	4.60287e-06		1000
537	ENSGALP00000009307	PLCD1	ENSGALP00000009307	537	537	35002	ENSGALP00000017456	Yip1 domain family, member 1 (YIPF1), transcript variant 2, mRNA.	YIPF1	158540	0	0	0	0	0	0	0	0	0	0	0	0	0							0						0	0	36248	0	122290	0			1.8058e-05		2.45351e-05		1000
1299	ENSGALP00000024751	PVRL3	ENSGALP00000024751	1299	1299	73059	ENSGALP00000017461	UDP-N-acetyl-alpha-D-galactosamine:polypeptide N-acetylgalactosaminyltransferase 7 (GalNAc-T7)	GALNT7	195160	0	0	0	0	0	0	0	0	0	0	0	0	0							0						0	0	0	36210	121400	37548				6.98268e-06	2.43566e-05	7.30212e-06	1000
163	ENSGALP00000002522	C1QBP	ENSGALP00000002522	163	163	23801	ENSGALP00000017462	High mobility group box 2	HMGB2	1569000	0	0	0	0	0	0	0	0	0	0	0	0	0							0						151930	0	0	409690	467510	539840	0.000106898			7.9004e-05	9.37969e-05	0.000104985	1000
157	ENSGALP00000002466	OGFOD3	ENSGALP00000002466	157	157	49660	ENSGALP00000017464	Fibulin 5	FBLN5	815630	0	0	0	0	0	0	0	0	0	0	0	0	0							0						41223	78931	37965	187880	196170	273460	2.90046e-05	5.07891e-05	1.89134e-05	3.62305e-05	3.93578e-05	5.31809e-05	1000
602	ENSGALP00000010447	CTD-2410N18.5	ENSGALP00000010447	602	602	82892	ENSGALP00000017563	Golgin A5	GOLGA5	369760	0	0	0	0	0	0	0	0	0	0	0	0	0							0						18244	4643.1	14526	110200	65355	156790	1.28365e-05	2.98766e-06	7.23657e-06	2.12508e-05	1.31122e-05	3.04916e-05	1000
1789	ENSGALP00000042855	RPL10	ENSGALP00000042855	1789	1789	35146	ENSGALP00000017568	Phosphatidic acid phosphatase type 2B	PPAP2B	2032400	0	0	0	0	0	0	0	0	0	0	0	0	0							0						147030	215920	159940	374020	719650	415890	0.000103451	0.000138936	7.9679e-05	7.21255e-05	0.000144384	8.08799e-05	1000
1436	ENSGALP00000027884	NDUFA9	ENSGALP00000027884	1436	1436	19095	ENSGALP00000017577	Anterior gradient 3	AGR3	66661000	0	0	0	0	0	0	0	0	0	0	0	0	0							0						3796500	1935400	4746600	18657000	19253000	18272000	0.00267122	0.00124536	0.00236466	0.00359779	0.00386275	0.00355343	1000
648	ENSGALP00000011291	APOOL	ENSGALP00000011291	648	648	19842	ENSGALP00000017578	Anterior gradient 2	AGR2	774090	0	0	0	0	0	0	0	0	0	0	0	0	0							0						0	52091	116860	187140	418000	0		3.35186e-05	5.82174e-05	3.60878e-05	8.38637e-05		1000
296	ENSGALP00000004982	COPE	ENSGALP00000004982	296	296	15521	ENSGALP00000017599	Signal peptidase complex subunit 3 homolog	SPCS3	3526700	0	0	0	0	0	0	0	0	0	0	0	0	0							0						0	0	0	1573300	1463700	489790				0.000303393	0.000293663	9.52515e-05	1000
1290	ENSGALP00000024677	C3H6ORF203	ENSGALP00000024677	1290	1290	106130	ENSGALP00000017661	USO1 vesicle transport factor	USO1	401770	0	0	0	0	0	0	0	0	0	0	0	0	0							0						0	15560	0	101890	99528	184790		1.00123e-05		1.96483e-05	1.99684e-05	3.59369e-05	1000
109	ENSGALP00000001577	SRPR	ENSGALP00000001577	109	109	56463	ENSGALP00000017732	Cytochrome P450 2J2-like	CYP2J2L	1971100	0	0	0	0	0	0	0	0	0	0	0	0	0							0						81021	0	108770	568800	637840	574690	5.70065e-05		5.41871e-05	0.000109687	0.00012797	0.000111762	1000
1505	ENSGALP00000043388;ENSGALP00000033991	WDR61	ENSGALP00000033991;ENSGALP00000043388	1505	1505	72611	ENSGALP00000017818	UDP-N-acetyl-alpha-D-galactosamine:polypeptide N-acetylgalactosaminyltransferase 3 (GalNAc-T3)	GALNT3	88879	0	0	0	0	0	0	0	0	0	0	0	0	0							0						0	0	0	26356	62523	0				5.08245e-06	1.2544e-05		1000
609	ENSGALP00000010541	TRA2B	ENSGALP00000010541	609	609	32464	ENSGALP00000017856	Transformer 2 alpha homolog	TRA2A	2163200	0	0	0	0	0	0	0	0	0	0	0	0	0							0						169310	118530	244660	716740	296040	617950	0.000119127	7.62695e-05	0.000121885	0.000138215	5.93948e-05	0.000120175	1000
699	ENSGALP00000012180	STX16	ENSGALP00000012180	699	699	32639	ENSGALP00000017865	Hydroxysteroid (17-beta) dehydrogenase 11	HSD17B11	459470	0	0	0	0	0	0	0	0	0	0	0	0	0							0						0	0	0	179630	176840	103000				3.46396e-05	3.54796e-05	2.00308e-05	1000
869	ENSGALP00000015394	GOLIM4	ENSGALP00000015394	869	869	136610	ENSGALP00000017869	Nidogen 1	NID1	1417300	0	0	0	0	0	0	0	0	0	0	0	0	0							0						141050	73871	119290	248010	446680	388410	9.9243e-05	4.75332e-05	5.9428e-05	4.78259e-05	8.96178e-05	7.55357e-05	1000
54	ENSGALP00000000494;ENSGALP00000021267;ENSGALP00000010010	SMARCD1;SMARCD2;SMARCD3	ENSGALP00000000494	54	54	56579	ENSGALP00000017877	Membrane protein, palmitoylated 6 (MAGUK p55 subfamily member 6)	MPP6	134990	0	0	0	0	0	0	0	0	0	0	0	0	0							0						0	0	19947	71883	0	43160			9.93721e-06	1.38618e-05		8.3935e-06	1000
1454	ENSGALP00000029109	PSMD3	ENSGALP00000029109	1454	1454	57449	ENSGALP00000017880	ALG6, alpha-1,3-glucosyltransferase	ALG6	286040	0	0	0	0	0	0	0	0	0	0	0	0	0							0						0	0	18749	79566	91230	96495			9.34039e-06	1.53434e-05	1.83036e-05	1.87658e-05	1000
538	ENSGALP00000009341	HDLBP	ENSGALP00000009341	538	538	66490	ENSGALP00000017926	Phosphoglucomutase 1	PGM1	199970	0	0	0	0	0	0	0	0	0	0	0	0	0							0						12699	6654.6	9487.2	102730	68394	0	8.93504e-06	4.28198e-06	4.72634e-06	1.98103e-05	1.37219e-05		1000
1629	ENSGALP00000039133	YWHAE	ENSGALP00000039133	394;624;1449;1550;1629	1629	11710	ENSGALP00000017934	Uncharacterized protein	AC012493.2	1804900	0	0	0	0	0	0	0	0	0	0	0	0	0							0						55674	20629	0	0	954140	774440	3.91723e-05	1.3274e-05			0.00019143	0.000150609	1000
38	ENSGALP00000000189	SNRPE	ENSGALP00000000189	38	38	36985	ENSGALP00000017954	Heterogeneous nuclear ribonucleoprotein A2/B1	HNRNPA2B1	2291300	0	0	0	0	0	0	0	0	0	0	0	0	0							0						196650	153690	287300	467700	626320	559610	0.000138363	9.88937e-05	0.000143127	9.01906e-05	0.000125659	0.00010883	1000
230	ENSGALP00000003715	MANF	ENSGALP00000003715	230	230	19777	ENSGALP00000017958	Chromobox homolog 3	CBX3	2063500	0	0	0	0	0	0	0	0	0	0	0	0	0							0						70830	0	0	592550	752290	647810	4.98361e-05			0.000114266	0.000150933	0.000125982	1000
686	ENSGALP00000011961	PEBP1	ENSGALP00000011961	686	686	24363	ENSGALP00000018038	RAB4A, member RAS oncogene family	RAB4A	924910	0	0	0	0	0	0	0	0	0	0	0	0	0							0						98481	66933	112720	120660	296720	229390	6.92914e-05	4.30688e-05	5.61549e-05	2.32679e-05	5.95312e-05	4.46104e-05	1000
1185	ENSGALP00000022180	MICU3	ENSGALP00000022180	1185	1185	131510	ENSGALP00000018048	Nucleoporin 133kDa	NUP133	70296	0	0	0	0	0	0	0	0	0	0	0	0	0							0						0	0	6702.9	37065	26528	0			3.33925e-06	7.14756e-06	5.32234e-06		1000
1314	ENSGALP00000024965	CYP7B1	ENSGALP00000024965	1314	1314	65330	ENSGALP00000018057	ATP-binding cassette, sub-family B (MDR/TAP), member 10	ABCB10	64748	0	0	0	0	0	0	0	0	0	0	0	0	0							0						0	0	0	26351	11200	27197				5.08149e-06	2.24707e-06	5.28911e-06	1000
991	ENSGALP00000017877	MPP6	ENSGALP00000017877	991	991	87229	ENSGALP00000018061	Fibroblast activation protein, alpha	FAP	213290	0	0	0	0	0	0	0	0	0	0	0	0	0							0						8379.7	0	13137	85083	25147	81544	5.89597e-06		6.5446e-06	1.64073e-05	5.04526e-06	1.58582e-05	1000
1126	ENSGALP00000043394;ENSGALP00000020806	CHPT1	ENSGALP00000020806;ENSGALP00000043394	1126	1126	35284	ENSGALP00000018063	3-hydroxyisobutyrate dehydrogenase	HIBADH	445870	0	0	0	0	0	0	0	0	0	0	0	0	0							0						39144	0	45834	152580	63141	145170	2.75418e-05		2.28336e-05	2.94233e-05	1.2668e-05	2.82318e-05	1000
254	ENSGALP00000004173	ITGAV	ENSGALP00000004173	254	254	60737	ENSGALP00000018070	UDP-N-acetyl-alpha-D-galactosamine:polypeptide N-acetylgalactosaminyltransferase 2 (GalNAc-T2)	GALNT2	2131100	0	0	0	0	0	0	0	0	0	0	0	0	0							0						161320	60827	155150	566640	624340	562800	0.000113505	3.91399e-05	7.72927e-05	0.00010927	0.000125262	0.00010945	1000
1526	ENSGALP00000034742	PLIN5	ENSGALP00000034742	1526	1526	86595	ENSGALP00000018078	Dipeptidyl-peptidase 4	DPP4	97223	0	0	0	0	0	0	0	0	0	0	0	0	0							0						0	0	0	35388	0	61836				6.82417e-06		1.20255e-05	1000
314	ENSGALP00000005281	CLTB	ENSGALP00000005281	314;1291	314	34567	ENSGALP00000018120	Proteasome (prosome, macropain) 26S subunit, non-ATPase, 14	PSMD14	462970	0	0	0	0	0	0	0	0	0	0	0	0	0							0						35205	22072	50039	0	355650	0	2.47703e-05	1.42025e-05	2.49285e-05		7.13544e-05		1000
1479	ENSGALP00000031600	SLC20A2	ENSGALP00000031600	1479	1479	57607	ENSGALP00000018174	Cytochrome P450, family 46, subfamily A, polypeptide 1	CYP46A1	438780	0	0	0	0	0	0	0	0	0	0	0	0	0							0						0	0	14663	118770	113570	191780			7.30482e-06	2.29034e-05	2.27856e-05	3.72963e-05	1000
855	ENSGALP00000015176	EIF3A	ENSGALP00000015176	855	855	29355	ENSGALP00000018212	Heterogeneous nuclear ribonucleoprotein D (AU-rich element RNA binding protein 1, 37kDa)	HNRNPD	1114900	0	0	0	0	0	0	0	0	0	0	0	0	0							0						119050	80239	67653	271830	290470	285680	8.37638e-05	5.16307e-05	3.37034e-05	5.24193e-05	5.82772e-05	5.55574e-05	1000
186	ENSGALP00000021769;ENSGALP00000003011	SAFB;SAFB2	ENSGALP00000003011;ENSGALP00000021769	186	186	106070	ENSGALP00000018235	Transmembrane and tetratricopeptide repeat containing 3	TMTC3	295510	0	0	0	0	0	0	0	0	0	0	0	0	0							0						14514	20728	19056	56458	114820	69939	1.02121e-05	1.33377e-05	9.49333e-06	1.08873e-05	2.30364e-05	1.36013e-05	1000
173	ENSGALP00000002828;ENSGALP00000042519	EEF2	ENSGALP00000002828;ENSGALP00000042519	173	173	45682	ENSGALP00000018265	Serpin peptidase inhibitor, clade H (heat shock protein 47), member 1, (collagen binding protein 1)	SERPINH1	51480000	0	0	0	16812	0	13933	2	21283	9968.3	68539	7863.3	0	0	0.000287434	0.000368658	0.000694423	0.000332683			4	0.0004208	0.000185418	7.56964e-05			4287200	2319600	6004900	12651000	12718000	13362000	0.00301648	0.00149257	0.00299152	0.0024396	0.00255162	0.00259856	1000
891	ENSGALP00000015708	ACADSB	ENSGALP00000015708	891	891	50112	ENSGALP00000018276	1-acylglycerol-3-phosphate O-acyltransferase 9 (AGPAT9	AGPAT9	73823	0	0	0	0	0	0	0	0	0	0	0	0	0							0						0	0	0	34751	39072	0				6.70133e-06	7.83905e-06		1000
382	ENSGALP00000006372	AKR7A2	ENSGALP00000006372	382	382	52742	ENSGALP00000018293	CDP-diacylglycerol synthase (phosphatidate cytidylyltransferase) 1	CDS1	163120	0	0	0	0	0	0	0	0	0	0	0	0	0							0						0	0	0	75052	88065	0				1.44729e-05	1.76686e-05		1000
664	ENSGALP00000011538	RAC1	ENSGALP00000011538	664	664	80610	ENSGALP00000018324	Chondroitin polymerizing factor	CHPF	33506000	0	1601000	7772400	2898000	10663000	10518000	5	0	0	0	28796	0	0				0.00121831			1	0.00121831					0	0	6616.8	17617	0	0			3.29636e-06	3.39724e-06			1000
1601	ENSGALP00000038282	RPL39	ENSGALP00000038282	1601	1601	35856	ENSGALP00000018368	Epiphycan	EPYC	14848000	0	0	0	0	0	0	0	0	0	0	0	0	0							0						1037000	630350	1519900	3385500	4697300	3578100	0.000729635	0.000405606	0.000757185	0.000652855	0.000942423	0.000695848	1000
604	ENSGALP00000010475	CHCHD3	ENSGALP00000010475	604	604	39627	ENSGALP00000018373	Decorin	DCN	3356600	0	0	0	0	0	0	0	0	0	0	0	0	0							0						352530	235770	383890	792780	1004600	587040	0.000248041	0.000151709	0.000191247	0.000152878	0.000201554	0.000114164	1000
1560	ENSGALP00000036539;ENSGALP00000036540	KCNIP4	ENSGALP00000036539;ENSGALP00000036540	1560	1560	158340	ENSGALP00000018388	Leucine rich repeat containing 7	LRRC7	22495	0	0	0	0	0	0	0	0	0	22495	0	0	0			0.000227915				1	0.000227915			0.00185301	#VALUE!	0	0	0	0	0	0							1000	0.00185301
379	ENSGALP00000006318	TLCD1	ENSGALP00000006318	379	379	183360	ENSGALP00000018410	Topoisomerase (DNA) II beta 180kDa	TOP2B	415510	0	0	0	0	0	0	0	0	0	0	0	0	0							0						4544.9	22257	41785	131180	100070	115670	3.1978e-06	1.43215e-05	2.08165e-05	2.52966e-05	2.00771e-05	2.24948e-05	1000
1216	ENSGALP00000023047	CIR1	ENSGALP00000023047	1216	1216	140460	ENSGALP00000018445	Latrophilin 3	LPHN3	49496	0	0	0	0	0	0	0	0	0	0	0	0	0							0						0	0	0	36873	12623	0				7.11053e-06	2.53256e-06		1000
1733	ENSGALP00000041886	UQCRFS1	ENSGALP00000041886	1733	1733	16945	ENSGALP00000018456	NADH dehydrogenase (ubiquinone) 1 alpha subcomplex, 12	NDUFA12	9932000	0	0	0	0	0	0	0	0	0	0	0	0	0							0						505340	265280	258320	2184400	3231600	3487100	0.000355558	0.000170698	0.00012869	0.000421236	0.000648359	0.000678151	1000
1803	ENSGALP00000043100	GIPC3	ENSGALP00000043100	1803	1803	206620	ENSGALP00000018461	Myeloid/lymphoid or mixed-lineage leukemia (trithorax homolog, Drosophila); translocated to, 4	MLLT4	128640	0	0	0	0	0	0	0	0	0	0	0	3238.2	2352.9					7.46842e-05	8.59495e-05	2	8.03168e-05	7.9658e-06	3.25202e-06	0.000652997	9.87138e-05	3075.7	4244.8	18034	23372	39181	35142	2.16407e-06	2.73137e-06	8.98419e-06	4.50702e-06	7.86092e-06	6.83421e-06	1000	0.00188835
1451	ENSGALP00000028857;ENSGALP00000003546	OGDH;OGDHL	ENSGALP00000028857	1451	1451	32451	ENSGALP00000018497	Neuronal growth regulator 1 (NEGR1	NEGR1	279920	0	0	0	0	0	0	0	0	0	0	0	0	0							0						0	0	0	129960	149960	0				2.50613e-05	3.00866e-05		1000
627	ENSGALP00000010942	RPS15A	ENSGALP00000010942	627	627	83301	ENSGALP00000018498	Heat shock protein 90kDa alpha (cytosolic), class A member 1	HSP90AA1	9370000	0	0	0	0	0	0	0	11852	0	0	2527.6	0	0	0.000160065			0.000106938			2	0.000133502	3.75665e-05	1.53364e-05	0.00108541	0.000260328	641670	473120	868320	2320000	2216800	2835700	0.00045148	0.000304435	0.00043258	0.000447385	0.000444758	0.00055147	1000	0.00108541
1044	ENSGALP00000018880	ATP2C1	ENSGALP00000018880	1044	1044	81309	ENSGALP00000018540	Solute carrier family 44, member 5	SLC44A5	236670	0	0	0	0	0	0	0	0	0	0	0	0	0							0						0	0	0	35390	111560	89719				6.82455e-06	2.23824e-05	1.7448e-05	1000
1123	ENSGALP00000020666	DEK	ENSGALP00000020666	1123	1123	47486	ENSGALP00000018548	BCS1-like	BCS1L	75786	0	0	0	0	0	0	0	0	0	0	0	0	0							0						0	0	0	0	75786	0					1.5205e-05		1000
908	ENSGALP00000016059	MRPS10	ENSGALP00000016059	908	908	38877	ENSGALP00000018565	Transmembrane protein 66	TMEM66	130260	0	0	0	0	0	0	0	0	0	0	0	0	0							0						0	0	0	27071	0	103190				5.22033e-06		2.00678e-05	1000
416	ENSGALP00000006963	KCNJ16	ENSGALP00000006963	416	416	74457	ENSGALP00000018577	Signal recognition particle 72kDa	SRP72	34843	0	0	0	0	0	0	0	0	0	0	0	0	0							0						0	0	0	18618	0	16224				3.59027e-06		3.15515e-06	1000
1818	ENSGALP00000043387	CSRP2	ENSGALP00000043387	1818	1818	58012	ENSGALP00000018644	Glutamate decarboxylase-like 1	GADL1	0	0	0	0	0	0	0	0	0	0	0	0	0	0							0						0	0	0	0	0	0							1000
1463	ENSGALP00000029968;ENSGALP00000008744	RPL3;RPL3L	ENSGALP00000029968	1463	1463	82862	ENSGALP00000018671	STT3B, subunit of the oligosaccharyltransferase complex (catalytic)	STT3B	3871000	0	0	0	0	0	0	0	0	0	0	0	0	0							0						286270	322290	355410	823970	955930	1127100	0.00020142	0.000207381	0.000177058	0.000158893	0.000191789	0.000219192	1000
691	ENSGALP00000012079	PTPLAD1	ENSGALP00000012079	691	691	10116	ENSGALP00000018679	Ribosomal protein L37a	RPL37A	3960200	0	0	0	0	0	0	0	0	0	0	0	0	0							0						197420	1044800	270460	875410	604970	967130	0.000138905	0.000672289	0.000134738	0.000168813	0.000121376	0.000188082	1000
477	ENSGALP00000008091	DKC1	ENSGALP00000008091	477	477	18671	ENSGALP00000018702	CKLF-like MARVEL transmembrane domain containing 7 (CMTM7	CMTM7	701570	0	0	0	0	0	0	0	0	0	0	0	0	0							0						0	0	0	388690	0	312870				7.49544e-05		6.08451e-05	1000
1716	ENSGALP00000041633	ILVBL	ENSGALP00000041633	1716	1716	53906	ENSGALP00000018715	Scavenger receptor class B, member 2	SCARB2	4345300	0	0	0	0	0	0	0	0	0	0	0	0	0							0						302040	198270	344720	1103100	1166100	1231200	0.000212516	0.000127579	0.000171733	0.00021272	0.000233956	0.000239437	1000
1810	ENSGALP00000043240	CDK5RAP3	ENSGALP00000043240	1810	1810	150960	ENSGALP00000018740	Complement C3 precursor	C3D	101780	0	0	0	0	0	0	0	0	0	0	0	0	0							0						21067	16452	14839	0	0	49421	1.48228e-05	1.05862e-05	7.3925e-06			9.61111e-06	1000
1749	ENSGALP00000042201	USMG5	ENSGALP00000042201	1749	1749	40203	ENSGALP00000018742	Creatine kinase, brain	CKB	17101000	0	0	0	0	0	0	0	0	0	0	0	0	0							0						1147600	473810	1408900	4275300	5323400	4472300	0.000807453	0.000304879	0.000701887	0.000824442	0.00106804	0.000869747	1000
1617	ENSGALP00000038778	ACTL6A	ENSGALP00000038778	1617	1617	70946	ENSGALP00000018747	Anoctamin 10	ANO10	373020	0	0	0	0	0	0	0	0	0	0	0	0	0							0						0	0	0	132070	151930	89020				2.54682e-05	3.04818e-05	1.73121e-05	1000
1070	ENSGALP00000019365	ANXA5	ENSGALP00000019365	1070	1070	40020	ENSGALP00000018750	Solute carrier family 25 (mitochondrial carrier; phosphate carrier), member 3	SLC25A3	54683000	0	0	0	27344	0	0	1	0	0	138080	0	91867	75115			0.001399		0.00211877	0.00274389	3	0.00208722	0.000673001	0.000274751			3222300	3843700	4071100	14225000	14596000	14393000	0.00226722	0.00247327	0.00202814	0.00274313	0.00292841	0.00279907	1000
461	ENSGALP00000007779	GOLGA2	ENSGALP00000007779	461	461	28180	ENSGALP00000018755	IKBKB interacting protein	IKBIP	288860	0	0	0	0	0	0	0	0	0	0	0	0	0							0						0	50622	0	149790	11683	76771		3.25733e-05		2.88853e-05	2.34397e-06	1.493e-05	1000
1762	ENSGALP00000042422	TMEM55A	ENSGALP00000042422	1762	1762	66753	ENSGALP00000018758	Protein O-linked mannose N-acetylglucosaminyltransferase 2 (beta 1,4-)	POMGNT2	335030	0	0	0	0	0	0	0	0	0	0	0	0	0							0						0	8516.2	31076	120150	82254	93030		5.47985e-06	1.54815e-05	2.31695e-05	1.65027e-05	1.80919e-05	1000
1036	ENSGALP00000018750	SLC25A3	ENSGALP00000018750	1036	1036	17292	ENSGALP00000018765	Ribosomal protein L14	RPL14	18564000	84810	0	0	0	0	0	1	87755	65070	184360	44033	43317	0	0.00118516	0.00240649	0.0018679	0.00186296	0.000999041		5	0.00166431	0.000570943	0.000233087			1736000	1367300	2592900	4087000	4054200	4216700	0.00122145	0.000879805	0.00129173	0.000788131	0.000813398	0.000820039	1000
1707	ENSGALP00000041438	MRPS15	ENSGALP00000041438	1707	1707	37659	ENSGALP00000018821	QKI, KH domain containing, RNA binding	QKI	126110	0	0	0	0	0	0	0	0	0	0	0	0	0							0						0	7491.7	0	31852	0	86771		4.82062e-06		6.14229e-06		1.68747e-05	1000
456	ENSGALP00000007707	LEPRE1	ENSGALP00000007707	456	456	272190	ENSGALP00000018843	Collagen, type VI, alpha 5	COL6A5	17839	0	0	0	0	0	0	0	0	0	0	0	17839	0					0.000411429		1	0.000411429			0.00334503	#VALUE!	0	0	0	0	0	0							1000	0.00334503
1079	ENSGALP00000019567;ENSGALP00000019568	RTN1	ENSGALP00000019567	1079	1079	42976	ENSGALP00000018849	Interleukin enhancer binding factor 2	ILF2	2936400	0	0	0	0	0	0	0	0	0	0	0	0	0							0						166110	82097	245440	710250	928300	804180	0.000116875	5.28263e-05	0.000122273	0.000136964	0.000186246	0.000156392	1000
773	ENSGALP00000013517	ARL8B	ENSGALP00000013517	773;1658	773	44389	ENSGALP00000018851	1-acylglycerol-3-phosphate O-acyltransferase 4	AGPAT4	1962100	0	0	0	0	0	0	0	0	0	0	0	0	0							0						65561	47690	119350	534500	752320	442720	4.61288e-05	3.06867e-05	5.94578e-05	0.000103072	0.000150939	8.60976e-05	1000
1325	ENSGALP00000025177	STAU2	ENSGALP00000025177	443;1325	1325	103720	ENSGALP00000018880	ATPase, Ca++ transporting, type 2C, member 1	ATP2C1	229340	0	0	0	0	0	0	0	0	0	0	0	0	0							0						24229	19685	43732	0	79125	62570	1.70476e-05	1.26665e-05	2.17864e-05		1.58749e-05	1.21682e-05	1000
1767	ENSGALP00000042524	SLC26A1	ENSGALP00000042524	1767	1767	121990	ENSGALP00000018925	Solute carrier family 4 (sodium bicarbonate cotransporter), member 4	SLC4A4	824880	0	0	0	0	0	0	0	0	0	0	0	0	0							0						29536	17126	26931	224180	273980	253120	2.07816e-05	1.10199e-05	1.34165e-05	4.32305e-05	5.49688e-05	4.92253e-05	1000
1729	ENSGALP00000041847	JMJD7	ENSGALP00000041847	1729	1729	84721	ENSGALP00000018929	Erythrocyte membrane protein band 4.1 like 5	EPB41L5	103490	0	0	0	0	0	0	0	0	0	0	0	0	0							0						0	0	0	20795	24746	57951				4.01008e-06	4.96481e-06	1.127e-05	1000
288	ENSGALP00000004669	DNER	ENSGALP00000004669	288	288	285320	ENSGALP00000018963	Insulin-like growth factor 2 receptor	IGF2R	56181	0	0	0	0	0	0	0	0	0	0	0	0	0							0						3349.7	2593.7	7339.5	24082	11715	7100	2.35685e-06	1.66895e-06	3.6564e-06	4.64394e-06	2.35039e-06	1.38077e-06	1000
421	ENSGALP00000007021	SLC39A11	ENSGALP00000007021	421	421	60466	ENSGALP00000018987	T-complex 1	TCP1	759190	0	0	0	0	0	0	0	0	0	0	0	0	0							0						51628	35124	90287	179960	207770	194420	3.63255e-05	2.2601e-05	4.49792e-05	3.47032e-05	4.16851e-05	3.78097e-05	1000
1248	ENSGALP00000042786;ENSGALP00000023664	GSTK1	ENSGALP00000023664;ENSGALP00000042786	1248	1248	20369	ENSGALP00000019017	ADP-ribosylation factor-like 1	ARL1	1092300	0	0	0	0	0	0	0	0	0	0	0	0	0							0						81814	50449	116150	341070	295710	207150	5.75645e-05	3.2462e-05	5.78637e-05	6.57714e-05	5.93286e-05	4.02853e-05	1000
849	ENSGALP00000038105;ENSGALP00000015057	FGB	ENSGALP00000015057;ENSGALP00000038105	849	849	136950	ENSGALP00000019027	AHNAK nucleoprotein 2	AHNAK2	63251	0	0	0	0	0	0	0	0	0	0	0	0	0							0						5640.5	0	0	23719	0	33891	3.96867e-06			4.57394e-06		6.59092e-06	1000
1743	ENSGALP00000042108	SLC44A2	ENSGALP00000042108	1743	1743	64004	ENSGALP00000019031	Albumin	ALB	141810	0	0	0	0	0	0	0	0	0	0	0	0	0							0						57842	8193.4	0	0	34354	41416	4.06977e-05	5.27214e-06			6.89247e-06	8.05434e-06	1000
866	ENSGALP00000015352;ENSGALP00000041693	SLC39A9	ENSGALP00000015352;ENSGALP00000041693	866	866	24859	ENSGALP00000019039	Superoxide dismutase 2, mitochondrial	SOD2	207090	0	0	0	0	0	0	0	0	0	0	0	0	0							0						0	0	0	0	143830	63256					2.88567e-05	1.23017e-05	1000
748	ENSGALP00000013059	LLGL2	ENSGALP00000013059	748	748	255010	ENSGALP00000019064	DnaJ (Hsp40) homolog, subfamily C, member 13	DNAJC13	41895	0	0	0	0	0	0	0	0	0	0	0	0	0							0						1427.2	0	2750.2	5331.8	13610	18775	1.00418e-06		1.3701e-06	1.02818e-06	2.73059e-06	3.65125e-06	1000
1766	ENSGALP00000042500	FAAH2	ENSGALP00000042500	1766	1766	61168	ENSGALP00000019087	Protein disulfide isomerase family A, member 5	PDIA5	366180	0	0	0	0	0	0	0	0	0	0	0	0	0							0						19055	15541	0	109670	110720	111190	1.34071e-05	1e-05		2.11486e-05	2.22138e-05	2.16236e-05	1000
822	ENSGALP00000014500;ENSGALP00000014506	ENTPD8	ENSGALP00000014500;ENSGALP00000014506	822	822	35104	ENSGALP00000019095	SEC22 vesicle trafficking protein homolog A	SEC22A	317550	0	0	0	0	0	0	0	0	0	0	0	0	0							0						44934	0	0	140430	132190	0	3.16156e-05			2.70803e-05	2.65214e-05		1000
703	ENSGALP00000012246	DPYSL3	ENSGALP00000012246	43;703	703	87123	ENSGALP00000019106	Acyl-CoA dehydrogenase family, member 11	ACAD11	121390	0	0	0	0	0	0	0	0	0	0	0	0	0							0						9172.3	0	0	0	42038	70181	6.45365e-06				8.43412e-06	1.36484e-05	1000
1105	ENSGALP00000020312	ZEB2	ENSGALP00000020312	1105	1105	24804	ENSGALP00000019163_family	Family {Histone cluster 1, H1b}	HIST1H1B	299470000	106020	140880	1185000	471100	300090	669260	6	348590	0	565010	37124	151539	30535	0.00470783		0.00572456	0.00157065	0.00349502	0.00111542	5	0.0033227	0.00197857	0.000807748			20264700	25904900	43553600	69506500	71903000	64328100	0.0142583	0.0166688	0.0216976	0.0134035	0.014426	0.0125102	1000
1223	ENSGALP00000023188	HNRNPAB	ENSGALP00000023188	1223	1223	88474	ENSGALP00000019200	Integrin, beta 5	ITGB5	437600	0	0	0	0	0	0	0	0	0	0	0	0	0							0						55685	0	0	94472	190900	96547	3.91801e-05			1.82178e-05	3.83004e-05	1.87759e-05	1000
1776	ENSGALP00000042647	SDR9C7	ENSGALP00000042647	1776	1776	67695	ENSGALP00000019233	KIAA1467	KIAA1467	249560	0	0	0	0	0	0	0	0	0	0	0	0	0							0						21962	0	34083	59221	66461	67835	1.54525e-05		1.69795e-05	1.14201e-05	1.33341e-05	1.31922e-05	1000
1792	ENSGALP00000042887	TBL2	ENSGALP00000042887	1792	1792	65756	ENSGALP00000019244	Mucin 13, cell surface associated	MUC13	227430	0	0	0	0	0	0	0	0	0	0	0	0	0							0						0	87621	0	0	80682	59130		5.63808e-05			1.61873e-05	1.14993e-05	1000
1644	ENSGALP00000039710	ABCA2	ENSGALP00000039710	1644	1644	168510	ENSGALP00000019247	Glutamate receptor, ionotropic, N-methyl D-aspartate 2B	GRIN2B	811040	0	0	0	0	0	0	0	0	811040	0	0	0	0		0.0299948					1	0.0299948			0.243865	#VALUE!	0	0	0	0	0	0							1000	0.243865
1308	ENSGALP00000024885	PTGFRN	ENSGALP00000024885	1308	1308	804200	ENSGALP00000019252	Spectrin repeat containing, nuclear envelope 2	SYNE2	17831	0	0	0	0	0	0	0	0	0	0	0	0	0							0						0	610.21	1041	6462.3	5071.5	4646.4		3.92647e-07	5.18606e-07	1.24618e-06	1.0175e-06	9.03605e-07	1000
1633	ENSGALP00000039313	RCN1	ENSGALP00000039313	1633	1633	34073	ENSGALP00000019258	Sulfotransferase family, cytosolic, 1B, member 1	SULT1B1	119780	0	0	0	0	0	0	0	0	0	0	0	0	0							0						25195	0	0	0	0	94583	1.77272e-05					1.83939e-05	1000
1160	ENSGALP00000021516	LPCAT1	ENSGALP00000021516	1160	1160	34246	ENSGALP00000019271	Calcium activated nucleotidase 1	CANT1	288650	0	0	0	0	0	0	0	0	0	0	0	0	0							0						0	0	0	51841	118100	118710				9.99694e-06	2.36945e-05	2.3086e-05	1000
613	ENSGALP00000010593	TM9SF4	ENSGALP00000010593	613	613	67489	ENSGALP00000019303	SAC1 suppressor of actin mutations 1-like	SACM1L	4556900	0	0	0	0	0	0	0	0	0	0	0	0	0							0						132130	674960	250210	1099100	1054900	1345500	9.29669e-05	0.000434311	0.00012465	0.000211949	0.000211645	0.000261665	1000
1000	ENSGALP00000018061	FAP	ENSGALP00000018061	1000	1000	34170	ENSGALP00000019335	Serine hydrolase-like 2	SERHL2	76246	0	0	0	0	0	0	0	0	0	0	0	0	0							0						0	0	0	0	0	76246						1.48279e-05	1000
1506	ENSGALP00000034078;ENSGALP00000030801	NME1;NME2	ENSGALP00000034078	1506	1506	36208	ENSGALP00000019365	Annexin A5	ANXA5	178890000	32285	0	0	0	0	0	1	0	0	0	0	0	0							0						10468000	12080000	16696000	45336000	46822000	47457000	0.0073653	0.00777302	0.00831762	0.00874253	0.00939394	0.00922916	1000
633	ENSGALP00000010984	AP2A2	ENSGALP00000010984	633	633	57946	ENSGALP00000019386	Cytochrome P450, family 2, subfamily D, polypeptide 6 (CYP2D6	CYP2D6	897320	0	0	0	0	0	0	0	0	0	0	0	0	0							0						0	0	17045	315900	266040	298340			8.49149e-06	6.09177e-05	5.33758e-05	5.80194e-05	1000
1678	ENSGALP00000040901	C14ORF1	ENSGALP00000040901	1678	1678	37720	ENSGALP00000019423	Dehydrogenase/reductase (SDR family) member 7	DHRS7	3422400	0	0	0	0	0	0	0	0	0	0	0	0	0							0						245200	242890	389980	930130	997450	616750	0.000172523	0.00015629	0.00019428	0.000179365	0.000200119	0.000119942	1000
462	ENSGALP00000007795	SLC2A1	ENSGALP00000007795	462	462	14074	ENSGALP00000019435	NHP2 non-histone chromosome protein 2-like 1	NHP2L1	1974000	0	0	0	0	0	0	0	0	0	0	0	0	0							0						196190	137950	181980	0	1020000	437910	0.00013804	8.87656e-05	9.06589e-05		0.000204643	8.51622e-05	1000
226	ENSGALP00000003646	GOT2	ENSGALP00000003646	226	226	85649	ENSGALP00000019468	Aconitase 2, mitochondrial	ACO2	5539800	0	0	0	0	0	0	0	0	0	0	0	0	0							0						338290	347530	468840	1359500	1507500	1518100	0.000238021	0.000223622	0.000233567	0.000262164	0.000302451	0.000295231	1000
1782	ENSGALP00000042682	WDR83OS	ENSGALP00000042682	1782	1782	33021	ENSGALP00000019469	Ribosomal protein SA	RPSA	51237000	19282	0	0	0	0	0	1	0	0	0	9851.4	0	0				0.000416796			1	0.000416796					4185800	2605100	5588800	12529000	13327000	12973000	0.00294514	0.00167628	0.00278423	0.00241607	0.00267381	0.00252291	1000
636	ENSGALP00000011025	CHID1	ENSGALP00000011025	636	636	43628	ENSGALP00000019498	Galactosidase, beta 1	GLB1	320410	0	0	0	0	0	0	0	0	0	0	0	0	0							0						0	0	0	151310	99454	69639				2.91784e-05	1.99535e-05	1.3543e-05	1000
279	ENSGALP00000004534	UQCC2	ENSGALP00000004534	279	279	56622	ENSGALP00000019563	X-prolyl aminopeptidase (aminopeptidase P) 3, putative	XPNPEP3	815850	0	0	0	0	0	0	0	0	0	0	0	0	0							0						67807	69522	62327	0	277560	338640	4.77091e-05	4.47348e-05	3.10501e-05		5.56871e-05	6.58567e-05	1000
1263	ENSGALP00000024043	GREB1L	ENSGALP00000024043	1263	1263	82529	ENSGALP00000019567	Reticulon 1	RTN1	3127600	0	0	0	0	0	0	0	0	0	0	0	0	0							0						218130	191850	230880	683750	869640	933310	0.000153477	0.000123448	0.00011502	0.000131853	0.000174477	0.000181505	1000
678	ENSGALP00000011717	RPLP0	ENSGALP00000011717	678	678	61114	ENSGALP00000019585	UDP glycosyltransferase 8	UGT8	9733700	0	0	0	0	0	0	0	0	0	0	0	0	0							0						323290	334880	514510	2835400	2773800	2951900	0.000227467	0.000215483	0.000256319	0.000546774	0.00055651	0.000574068	1000
1145	ENSGALP00000021314	CALD1	ENSGALP00000021314	1145	1145	97314	ENSGALP00000019634	Programmed cell death 6 interacting protein	PDCD6IP	84637	0	0	0	0	0	0	0	0	0	0	0	0	0							0						0	0	3899.3	24850	20927	34961			1.94256e-06	4.79204e-06	4.1986e-06	6.79901e-06	1000
494	ENSGALP00000008307	COL11A1	ENSGALP00000008307	494	494	414080	ENSGALP00000019635	Ankyrin 2, neuronal	ANK2	6897.2	0	0	0	0	0	0	0	0	0	0	0	0	0							0						0	0	0	0	0	6897.2						1.34133e-06	1000
384	ENSGALP00000006403	MATN4	ENSGALP00000006403	384	384	42591	ENSGALP00000019755	Eukaryotic translation initiation factor 3, subunit M	EIF3M	958680	0	0	0	0	0	0	0	0	0	0	0	0	0							0						52933	0	75863	204260	313280	312340	3.72437e-05		3.77935e-05	3.93892e-05	6.28536e-05	6.07421e-05	1000
250	ENSGALP00000004046	RAN	ENSGALP00000004046	250	250	48443	ENSGALP00000019801	Septin 7	SEPT7_	766690	0	0	0	0	0	0	0	0	0	0	0	0	0							0						67202	0	74341	130280	195350	299520	4.72834e-05		3.70352e-05	2.5123e-05	3.91932e-05	5.82489e-05	1000
1331	ENSGALP00000025284;ENSGALP00000043101	LETM1	ENSGALP00000025284;ENSGALP00000043101	1331	1331	25891	ENSGALP00000019827	Synaptogyrin 1	SYNGR1	1245000	0	0	0	0	0	0	0	0	0	0	0	0	0							0						0	0	0	427000	818010	0				8.2342e-05	0.000164118		1000
790	ENSGALP00000013835	ALG3	ENSGALP00000013835	790	790	83709	ENSGALP00000019831	DPY-19-like 1, like	DPY19L1L	266310	0	0	0	0	0	0	0	0	0	0	0	0	0							0						11495	0	0	123950	64485	66384	8.0879e-06			2.39023e-05	1.29377e-05	1.291e-05	1000
762	ENSGALP00000013267	GDI2	ENSGALP00000013267	762	762	47421	ENSGALP00000019832	ARP3 actin-related protein 3 homolog	ACTR3	959630	12862	0	0	0	0	0	1	0	0	0	0	0	0							0						68883	0	85378	302730	263420	226360	4.84662e-05		4.25337e-05	5.8378e-05	5.28502e-05	4.40212e-05	1000
919	ENSGALP00000016318;ENSGALP00000024246;ENSGALP00000006433	PTPRD;PTPRF;PTPRS	ENSGALP00000006433;ENSGALP00000016318;ENSGALP00000024246	919	919	120010	ENSGALP00000019969	R3H domain containing 1	R3HDM1	6787.3	0	0	0	0	0	0	0	0	0	0	0	0	0							0						0	0	0	0	6787.3	0					1.36174e-06		1000
151	ENSGALP00000002380	NT5DC2	ENSGALP00000002380	151	151	398830	ENSGALP00000019988	Utrophin	UTRN	11675	0	0	0	0	0	0	0	0	0	0	0	0	0							0						0	0	5382.4	0	6292.5	0			2.68141e-06		1.26247e-06		1000
707	ENSGALP00000012344	HMOX2	ENSGALP00000012344	707	707	57027	ENSGALP00000019994	UBX domain protein 4	UBXN4	3803500	0	0	0	0	0	0	0	0	0	0	0	0	0							0						259550	211120	305540	971630	984990	1070700	0.00018262	0.000135848	0.000152214	0.000187368	0.000197619	0.000208223	1000
192	ENSGALP00000003111	STXBP3	ENSGALP00000003111	192	192	48609	ENSGALP00000020045	L-2-hydroxyglutarate dehydrogenase	L2HGDH	37274	0	0	0	0	0	0	0	0	0	0	0	0	0							0						0	0	0	23081	0	14193				4.45091e-06		2.76017e-06	1000
1086	ENSGALP00000019827	SYNGR1	ENSGALP00000019827	1086	1086	66682	ENSGALP00000020064	Eukaryotic translation initiation factor 3, subunit L	EIF3L	1548000	0	0	0	0	0	0	0	0	0	0	0	0	0							0						52851	27106	54934	522680	400590	489800	3.71861e-05	1.74417e-05	2.7367e-05	0.000100793	8.03707e-05	9.52534e-05	1000
1797	ENSGALP00000043011	FXYD6	ENSGALP00000043011	1797	1797	23548	ENSGALP00000020091_family	Family {V-ral simian leukemia viral oncogene homolog A (ras related)}	RALA;RALB	10515800	0	0	0	0	0	0	0	0	0	0	0	0	0							0						639019	539390	617830	2444100	2623330	3652000	0.000449615	0.000347077	0.000307791	0.000471317	0.000526321	0.00071022	1000
918	ENSGALP00000016307	FAM177A1	ENSGALP00000016307	918	918	45197	ENSGALP00000020093	Glycine C-acetyltransferase	GCAT	250080	0	0	0	0	0	0	0	0	0	0	0	0	0							0						45258	14914	89291	0	72885	27726	3.18436e-05	9.59659e-06	4.4483e-05		1.4623e-05	5.39199e-06	1000
1194	ENSGALP00000022434	AFG3L2	ENSGALP00000022434	1194	1194	63863	ENSGALP00000020135	Atlastin GTPase 1	ATL1	345410	0	0	0	0	0	0	0	0	0	0	0	0	0							0						26064	0	0	94001	90760	134580	1.83387e-05			1.8127e-05	1.82093e-05	2.61723e-05	1000
1063	ENSGALP00000019244	MUC13	ENSGALP00000019244	1063	1063	27422	ENSGALP00000020185	Chromosome 14 open reading frame 166	C14ORF166	219010	0	0	0	0	0	0	0	0	0	0	0	0	0							0						19979	0	29076	104310	65640	0	1.40573e-05		1.44851e-05	2.0115e-05	1.31694e-05		1000
727	ENSGALP00000012785	PNPLA6	ENSGALP00000012785	727	727	130950	ENSGALP00000020214	Nidogen 2 (osteonidogen)	NID2	303840	0	0	0	0	0	0	0	0	0	0	269450	0	0				0.0114			1	0.0114			0.0926848	#VALUE!	0	0	0	17148	17241	0				3.30679e-06	3.45908e-06		1000	0.436842
217	ENSGALP00000003455	PPIB	ENSGALP00000003455	217	217	71028	ENSGALP00000020268	Protein disulfide isomerase family A, member 4	PDIA4	14718000	0	0	0	0	0	0	0	0	0	0	0	0	0							0						1308300	1606600	1424100	3196300	3443000	3739500	0.000920522	0.00103379	0.000709459	0.00061637	0.000690772	0.000727236	1000
911	ENSGALP00000016113	COCH	ENSGALP00000016113	911	911	136340	ENSGALP00000020312	Zinc finger E-box binding homeobox 2	ZEB2	0	0	0	0	0	0	0	0	0	0	0	0	0	0							0						0	0	0	0	0	0							1000
222	ENSGALP00000003592	LIG3	ENSGALP00000003592	222	222	174010	ENSGALP00000020320	Tensin 3 (TNS3	TNS3	35897	35897	0	0	0	0	0	1	0	0	0	0	0	0							0						0	0	0	0	0	0							1000
228	ENSGALP00000003691	C3ORF58	ENSGALP00000003691	228	228	81041	ENSGALP00000020349	Pre-mRNA processing factor 39	PRPF39	127540	0	0	0	0	0	0	0	0	0	0	0	0	0							0						0	0	0	41049	44942	41549				7.91583e-06	9.01675e-06	8.08021e-06	1000
1547	ENSGALP00000035959	CBR1	ENSGALP00000035959	1547	1547	33221	ENSGALP00000020373	Mercaptopyruvate sulfurtransferase	MPST	216910	0	0	0	0	0	0	0	0	0	0	0	0	0							0						35519	0	57341	37089	0	86963	2.49912e-05		2.85662e-05	7.15219e-06		1.69121e-05	1000
1043	ENSGALP00000018851	AGPAT4	ENSGALP00000018851	1043	1043	32913	ENSGALP00000020374	Thiosulfate sulfurtransferase (rhodanese)	TST	1938300	0	0	0	0	0	0	0	0	0	0	0	0	0							0						131830	48997	83768	358510	675820	639350	9.27558e-05	3.15277e-05	4.17316e-05	6.91345e-05	0.00013559	0.000124337	1000
429	ENSGALP00000007206	KIAA2013	ENSGALP00000007206	429	429	34704	ENSGALP00000020439	Eukaryotic translation initiation factor 3, subunit D	EIF3D	834300	0	0	0	0	0	0	0	0	0	0	0	0	0							0						12017	32699	0	239580	146060	403950	8.45518e-06	2.10406e-05		4.62002e-05	2.93041e-05	7.85578e-05	1000
1396	ENSGALP00000026689	EPHX2	ENSGALP00000026689	1396	1396	226630	ENSGALP00000020445	Myosin, heavy chain 9, non-muscle	MYH9	2194000	35997	0	0	0	0	0	1	29737	0	12146	0	0	0	0.000401609		0.000123061				2	0.000262335	0.000196963	8.04099e-05			221430	144350	328760	381620	557180	482750	0.000155799	9.28837e-05	0.000163782	7.3591e-05	0.000111788	9.38824e-05	1000
220	ENSGALP00000003580	TRAPPC3	ENSGALP00000003580	220	220	80751	ENSGALP00000020459	Glycerol-3-phosphate dehydrogenase 2 (mitochondrial)	GPD2	1320900	0	0	0	0	0	0	0	0	0	0	0	0	0							0						72485	64632	95903	392500	326100	369320	5.10006e-05	4.15882e-05	4.7777e-05	7.56891e-05	6.54257e-05	7.18232e-05	1000
757	ENSGALP00000013174;ENSGALP00000038735	RPS27A;UBD	ENSGALP00000013174;ENSGALP00000038735	757	757	57024	ENSGALP00000020470	Target of myb1	TOM1	293160	0	0	0	0	0	0	0	5657.7	0	0	0	0	0	7.64092e-05						1	7.64092e-05			0.000621227	#VALUE!	0	0	13254	149390	52779	72078			6.60288e-06	2.88081e-05	1.05891e-05	1.40173e-05	1000	0.00066015
1250	ENSGALP00000023784	EPB41L3	ENSGALP00000023784	1250	1250	43042	ENSGALP00000020548	Golgi membrane protein 1	GOLM1	478990	0	0	0	0	0	0	0	0	0	0	0	0	0							0						0	0	0	100490	251100	127390				1.93783e-05	5.03784e-05	2.47741e-05	1000
34	ENSGALP00000000102	SCRIB	ENSGALP00000000102	34	34	55242	ENSGALP00000020561	RNA 2',3'-cyclic phosphate and 5'-OH ligase	RTCB	156850	0	0	0	0	0	0	0	0	0	0	0	0	0							0						18263	28835	24514	0	22606	62630	1.28499e-05	1.85542e-05	1.22124e-05		4.53546e-06	1.21799e-05	1000
442	ENSGALP00000007520	SLC7A10	ENSGALP00000007520	442	442	142830	ENSGALP00000020568	Collagen, type XV, alpha 1	COL15A1	41246	0	0	0	0	0	0	0	0	0	0	0	0	0							0						0	0	4948	12435	0	23862			2.465e-06	2.39795e-06		4.64054e-06	1000
579	ENSGALP00000010060	GALNT11	ENSGALP00000010060	579	579	105700	ENSGALP00000020581	Reversion-inducing-cysteine-rich protein with kazal motifs	RECK	28977	0	0	0	0	0	0	0	0	0	0	0	0	0							0						0	0	17199	0	11777	0			8.56821e-06		2.36283e-06		1000
571	ENSGALP00000009960	RPL13	ENSGALP00000009960	571	571	56822	ENSGALP00000020634	Cytoskeleton-associated protein 4	CKAP4	92374000	0	0	0	0	0	0	0	0	0	0	0	0	0							0						7131100	5773700	9944900	22495000	22162000	24868000	0.00501745	0.00371516	0.00495436	0.0043379	0.00444638	0.00483618	1000
364	ENSGALP00000006050	CHERP	ENSGALP00000006050	364	364	118120	ENSGALP00000020635	KIAA0319	KIAA0319	25292	0	0	0	0	0	0	0	0	0	0	0	0	0							0						0	0	0	0	0	25292						4.91864e-06	1000
1780	ENSGALP00000042669	ALG10	ENSGALP00000042669	1780	1780	57922	ENSGALP00000020641	Aldehyde dehydrogenase 5 family, member A1	ALDH5A1	30943	0	0	0	0	0	0	0	0	0	0	0	0	0							0						0	12476	18467	0	0	0		8.02783e-06	9.1999e-06				1000
1318	ENSGALP00000025077	UFL1	ENSGALP00000025077	1318	1318	42163	ENSGALP00000020666	DEK oncogene	DEK	220170	0	0	0	0	0	0	0	0	0	0	0	0	0							0						0	0	0	119200	33206	67765				2.29863e-05	6.66215e-06	1.31785e-05	1000
1146	ENSGALP00000021326	ABCA13	ENSGALP00000021326	1146	1146	277280	ENSGALP00000020777	Stabilin 2	STAB2	2109.8	0	0	0	0	0	0	0	0	0	0	0	0	0							0						0	2109.8	0	0	0	0		1.35758e-06					1000
1127	ENSGALP00000020830	TXNDC5	ENSGALP00000020830	1127	1127	46422	ENSGALP00000020830	Thioredoxin domain containing 5 (endoplasmic reticulum)	TXNDC5	2153300	0	0	0	0	0	0	0	0	0	0	0	0	0							0						112830	89928	77362	736250	590960	546000	7.93874e-05	5.78652e-05	3.85402e-05	0.000141977	0.000118565	0.000106183	1000
1621	ENSGALP00000038922	RPGRIP1L	ENSGALP00000038922	1621	1621	321120	ENSGALP00000020840	Desmoplakin	DSP	328890	12752	3857.4	54752	14002	0	3322.2	5	3128.1	7265.9	18227	7379.2	6863.1	4018.3	4.22461e-05	0.000268715	0.000184672	0.000312201	0.000158287	0.000146785	6	0.000185485	9.5645e-05	3.90469e-05			12387	18750	69990	23803	31811	36586	8.71551e-06	1.20649e-05	3.48677e-05	4.59013e-06	6.38227e-06	7.11503e-06	1000
1788	ENSGALP00000042850	MPZ	ENSGALP00000042850	1788	1788	32172	ENSGALP00000020852	Signal sequence receptor, alpha	SSR1	27885000	0	0	0	0	0	0	0	0	0	0	0	0	0							0						2083400	1153500	2825400	6841500	7438500	7542400	0.00146588	0.000742233	0.00140756	0.0013193	0.00149239	0.0014668	1000
1552	ENSGALP00000036322	MRPS26	ENSGALP00000036322	1552	1552	44008	ENSGALP00000020867	Enoyl-CoA delta isomerase 2	ECI2	225970	0	0	0	0	0	0	0	0	0	0	0	0	0							0						0	0	37138	73533	115300	0			1.85014e-05	1.418e-05	2.31327e-05		1000
1737	ENSGALP00000041968;XP_427707.3	CACNA2D2	ENSGALP00000041968;XP_427707.3	1737	1737	126810	ENSGALP00000020874	Pre-mRNA processing factor 4B	PRPF4B	13998	0	0	0	0	0	0	0	0	0	0	0	0	0							0						0	0	0	0	0	13998						2.72225e-06	1000
1794	ENSGALP00000042908	KIAA1324	ENSGALP00000042908	1794	1794	68987	ENSGALP00000020879	Solute carrier family 22, member 23	SLC22A23	31876	0	0	0	0	0	0	0	0	0	0	0	0	0							0						0	0	0	0	31876	0					6.39531e-06		1000
386	ENSGALP00000006412	GALNT10	ENSGALP00000006412	386	386	51141	ENSGALP00000020966	Acylglycerol kinase	AGK	58393	0	0	0	0	0	0	0	0	0	0	0	0	0							0						0	0	58393	0	0	0			2.90903e-05				1000
1306	ENSGALP00000024856	SLC44A1	ENSGALP00000024856	1306	1306	17504	ENSGALP00000020973	Single-stranded DNA binding protein 1, mitochondrial	SSBP1	441890	0	0	0	0	0	0	0	0	0	0	0	0	0							0						0	0	0	143570	171050	127270				2.76858e-05	3.43179e-05	2.47507e-05	1000
1382	ENSGALP00000026363	PXDN	ENSGALP00000026363	1382	1382	77684	ENSGALP00000021055	Dynamin 1-like	DNM1L	10725	0	0	0	0	0	0	0	0	0	0	0	0	0							0						0	0	3797.4	3276.7	0	3650.5			1.89179e-06	6.31874e-07		7.09928e-07	1000
1370	ENSGALP00000026748;ENSGALP00000026183;ENSGALP00000026747	EFR3A;EFR3B	ENSGALP00000026183;ENSGALP00000026748	1370	1370	51160	ENSGALP00000021117	ANKH inorganic pyrophosphate transport regulator	ANKH	19913	0	0	0	0	0	0	0	0	0	0	0	0	0							0						0	0	0	0	0	19913						3.87256e-06	1000
1805	ENSGALP00000043125	BCAP31	ENSGALP00000043125	1805	1805	44364	ENSGALP00000021119	Family with sequence similarity 105, member A (FAM105A	FAM105A	926340	0	0	0	0	0	0	0	0	0	0	0	0	0							0						70711	49464	40321	263550	285130	217160	4.97524e-05	3.18282e-05	2.00871e-05	5.08226e-05	5.72059e-05	4.2232e-05	1000
1001	ENSGALP00000018063;ENSGALP00000043234	HIBADH	ENSGALP00000018063;ENSGALP00000043234	1001	1001	26118	ENSGALP00000021250	ATPase, H+ transporting, lysosomal 31kDa, V1 subunit E1	ATP6V1E1	469930	0	0	0	0	0	0	0	0	0	0	0	0	0							0						53321	0	39119	89132	206380	81983	3.75167e-05		1.94883e-05	1.71881e-05	4.14062e-05	1.59436e-05	1000
227	ENSGALP00000003683	AP3S1	ENSGALP00000003683	227	227	51307	ENSGALP00000021251	BCL2-like 13 (apoptosis facilitator)	BCL2L13	263390	0	0	0	0	0	0	0	0	0	0	0	0	0							0						0	0	0	112090	76961	74340				2.16153e-05	1.54408e-05	1.44572e-05	1000
769	ENSGALP00000013449	TMED3	ENSGALP00000013449	769	769	59714	ENSGALP00000021255	Chaperonin containing TCP1, subunit 5 (epsilon)	CCT5	207910	0	0	0	0	0	0	0	0	0	0	0	0	0							0						12877	31981	0	56999	43374	62681	9.06028e-06	2.05786e-05		1.09916e-05	8.70216e-06	1.21898e-05	1000
865	ENSGALP00000015343	MIA3	ENSGALP00000015343	865	865	36440	ENSGALP00000021301	Aldo-keto reductase family 1, member E2	AKR1E2	139840	0	0	0	0	0	0	0	0	0	0	0	0	0							0						21924	0	0	49028	68892	0	1.54258e-05			9.45449e-06	1.38219e-05		1000
1003	ENSGALP00000018078	DPP4	ENSGALP00000018078	1003	1003	35663	ENSGALP00000021303	Aldo-keto reductase family 1, member B1 (aldose reductase)	AKR1B1	134020	0	0	0	0	0	0	0	0	0	0	0	0	0							0						0	12914	0	36802	41721	42584		8.30967e-06		7.09684e-06	8.37052e-06	8.28149e-06	1000
1450	ENSGALP00000028747	HRSP12	ENSGALP00000028747	1450	1450	86402	ENSGALP00000021314	Caldesmon	CALD1	47588	0	0	0	0	0	0	0	0	0	0	0	0	0							0						0	0	0	25724	21864	0				4.96058e-06	4.38659e-06		1000
1026	ENSGALP00000018577	SRP72	ENSGALP00000018577	1026	1026	200070	ENSGALP00000021326	ATP-binding cassette, sub-family A (ABC1), member 13	ABCA13	16730	0	0	0	0	0	0	0	0	0	0	0	0	0							0						0	0	0	0	16730	0					3.35655e-06		1000
128;488	ENSGALP00000001981;ENSGALP00000008236	CLTC;CLTCL1	ENSGALP00000008236;ENSGALP00000001981	128;488	128;488	17284	ENSGALP00000021353	Microsomal glutathione S-transferase 1	MGST1	37215000	0	0	0	0	0	0	0	0	0	0	0	23642	0					0.000545267		1	0.000545267			0.00443316	#VALUE!	2010100	1767400	2276900	8858800	10470000	11808000	0.00141431	0.00113725	0.00113431	0.00170832	0.00210061	0.00229635	1000	0.00443316
1830	REV__ENSGALP00000009089	REV__ENSGALP00000009089	REV__ENSGALP00000009089	1830	1830	7741.2	ENSGALP00000021367	Sec61 gamma subunit	SEC61G	32692000	0	0	0	0	0	0	0	0	0	0	0	0	0							0						2319200	1298000	2578300	9122400	7796900	9576900	0.00163179	0.000835214	0.00128446	0.00175915	0.0015643	0.00186246	1000
422	ENSGALP00000007030	SDK1	ENSGALP00000007030	422	422	22423	ENSGALP00000021405	YKT6 v-SNARE homolog	YKT6	107440	0	0	0	0	0	0	0	0	0	0	0	0	0							0						21117	17467	0	0	0	68851	1.4858e-05	1.12393e-05				1.33897e-05	1000
1713	ENSGALP00000041526	H4-I	ENSGALP00000041526	1713	1713	119720	ENSGALP00000021407	Pleckstrin homology domain containing, family A member 5	PLEKHA5	125650	0	0	0	0	0	0	0	0	0	0	0	0	1969.7						7.19515e-05	1	7.19515e-05			0.000584985	#VALUE!	6252.6	59342	0	14952	19417	23715	4.39934e-06	3.81843e-05		2.88332e-06	3.89565e-06	4.61195e-06	1000	0.000864043
1738	ENSGALP00000041979	PRKACB	ENSGALP00000041979	1738	1738	64072	ENSGALP00000021411	UDP-N-acetyl-alpha-D-galactosamine:polypeptide N-acetylgalactosaminyltransferase 1 (GalNAc-T1)	GALNT1	546570	0	0	0	0	0	0	0	0	0	0	0	0	0							0						42330	69443	26747	158980	210580	38484	2.97835e-05	4.46839e-05	1.33248e-05	3.06575e-05	4.22488e-05	7.48414e-06	1000
1675	ENSGALP00000040819	MRPL55	ENSGALP00000040819	1675	1675	97412	ENSGALP00000021416	Transmembrane protein 245	TMEM245	684640	0	0	0	0	0	0	0	0	0	0	0	0	0							0						53321	27929	38946	156860	210660	196930	3.75167e-05	1.79712e-05	1.94021e-05	3.02486e-05	4.22649e-05	3.82978e-05	1000
1783	ENSGALP00000042693	RAB34	ENSGALP00000042693	1783	1783	183640	ENSGALP00000021425	Plexin B2	PLXNB2	69982	0	0	0	0	0	0	0	0	0	0	0	0	0							0						0	2745.8	0	14744	31838	20655		1.76682e-06		2.84321e-06	6.38769e-06	4.01686e-06	1000
1612	ENSGALP00000038587	ARPC5	ENSGALP00000038587	1612	1612	24602	ENSGALP00000021459	Charged multivesicular body protein 5	CHMP5	828560	0	0	0	0	0	0	0	0	0	0	0	0	0							0						139060	0	177990	0	308690	202820	9.78428e-05		8.86711e-05		6.19327e-05	3.94432e-05	1000
916	ENSGALP00000016196	CCT2	ENSGALP00000016196	916	916	54299	ENSGALP00000021472	Fumarate hydratase	FH	905430	0	0	0	0	0	0	0	0	0	0	0	0	0							0						52797	81099	135630	208400	190490	237020	3.71481e-05	5.21841e-05	6.75682e-05	4.01875e-05	3.82182e-05	4.60943e-05	1000
277	ENSGALP00000004515	RPL26	ENSGALP00000004515	277	277	72963	ENSGALP00000021475	Succinate dehydrogenase complex, subunit A, flavoprotein (Fp)	SDHA	8065400	0	0	0	0	0	0	0	0	0	0	0	0	0							0						962490	879840	689690	1643700	2138100	1751600	0.00067721	0.000566144	0.00034359	0.000316969	0.000428969	0.000340641	1000
1028	ENSGALP00000018644	GADL1	ENSGALP00000018644	1028	1028	70580	ENSGALP00000021502	GRAM domain containing 4	GRAMD4	263520	0	0	0	0	0	0	0	243000	0	0	0	0	0	0.0032818						1	0.0032818			0.0266819	#VALUE!	0	0	0	0	20521	0					4.11715e-06		1000	0.103331
297	ENSGALP00000004997	GNAO1	ENSGALP00000004997	29;297;436;779	297	155280	ENSGALP00000021506	Telomerase reverse transcriptase	TERT	426240	0	0	0	119180	0	307060	2	0	0	0	0	0	0							0						0	0	0	0	0	0							1000
53	ENSGALP00000000468;ENSGALP00000019284	PSMC5;SPATA5	ENSGALP00000000468	53	53	61967	ENSGALP00000021513	CLPTM1-like	CLPTM1L	365580	0	0	0	0	0	0	0	0	0	0	0	0	0							0						0	0	20372	61332	120660	163220			1.01489e-05	1.18272e-05	2.42081e-05	3.17421e-05	1000
682	ENSGALP00000011804	PYCR1	ENSGALP00000011804	682	682	59802	ENSGALP00000021516	Lysophosphatidylcholine acyltransferase 1	LPCAT1	313390	0	0	0	0	0	0	0	0	0	0	0	0	0							0						0	0	16249	127200	102740	67200			8.09494e-06	2.45291e-05	2.06128e-05	1.30687e-05	1000
1129	ENSGALP00000020852	SSR1	ENSGALP00000020852	1129	1129	14042	ENSGALP00000021519	NADH dehydrogenase (ubiquinone) Fe-S protein 6, 13kDa (NADH-coenzyme Q reductase)	NDUFS6	18558000	0	0	0	0	0	0	0	0	0	0	0	0	0							0						825620	249450	422530	4829200	6389500	5841800	0.000580908	0.000160512	0.000210496	0.000931256	0.00128193	0.00113608	1000
224	ENSGALP00000003621	COMMD10	ENSGALP00000003621	224	224	124240	ENSGALP00000021547	C2 calcium-dependent domain containing 5	C2CD5	51044	0	0	0	0	0	0	0	0	0	0	0	0	0							0						8661.7	0	0	4075.6	8324.8	29982	6.09439e-06			7.85933e-07	1.67021e-06	5.83072e-06	1000
598	ENSGALP00000010426	CCDC51	ENSGALP00000010426	598	598	72450	ENSGALP00000021686	Solute carrier family 27 (fatty acid transporter), member 1	SLC27A1	294110	0	0	0	0	0	0	0	0	0	0	0	0	0							0						0	27222	29865	34504	144010	58507		1.75163e-05	1.48782e-05	6.6537e-06	2.88928e-05	1.13781e-05	1000
1020	ENSGALP00000018461	MLLT4	ENSGALP00000018461	1020	1020	47568	ENSGALP00000021708	Poly(rC) binding protein 2	PCBP2	959020	0	0	0	0	0	0	0	18929	0	38364	8268.4	0	0	0.000255643		0.000388696	0.000349822			3	0.000331387	6.84154e-05	2.79305e-05	0.00269426	0.000435801	93914	127720	157720	153650	266980	93468	6.6078e-05	8.2183e-05	7.8573e-05	2.96296e-05	5.35644e-05	1.81771e-05	1000	0.00269426
1164	ENSGALP00000021686	SLC27A1	ENSGALP00000021686	1164	1164	43923	ENSGALP00000021749	Splicing factor 3b, subunit 4, 49kDa	SF3B4	184080	0	0	0	0	0	0	0	0	0	0	0	0	0							0						0	0	0	91465	92618	0				1.7638e-05	1.8582e-05		1000
399	ENSGALP00000006635	GAA	ENSGALP00000006635	399	399	87638	ENSGALP00000021762	Chondroitin polymerizing factor 2	CHPF2	6149.5	0	0	0	0	0	0	0	0	0	0	0	0	0							0						0	0	0	6149.5	0	0				1.18586e-06			1000
48	ENSGALP00000000406	CERS4	ENSGALP00000000406	48	48	103740	ENSGALP00000021769	Scaffold attachment factor B2	SAFB2	188080	0	0	0	0	0	0	0	0	0	0	0	0	0							0						16371	0	0	59354	59251	53101	1.15187e-05			1.14457e-05	1.18876e-05	1.03268e-05	1000
320	ENSGALP00000005468	CNP	ENSGALP00000005468	320	320	63089	ENSGALP00000021774	Nicalin	NCLN	5729600	0	0	0	0	0	0	0	0	0	0	0	0	0							0						276840	171760	341240	1693300	1622700	1623800	0.000194785	0.000110521	0.000169999	0.000326533	0.000325564	0.000315787	1000
59	ENSGALP00000000594	ERMP1	ENSGALP00000000594	59	59	21945	ENSGALP00000021792	SCO1 cytochrome c oxidase assembly protein	SCO1	74925	0	0	0	0	0	0	0	0	0	0	0	0	0							0						0	0	74925	0	0	0			3.73262e-05				1000
1353	ENSGALP00000025887	SFXN5	ENSGALP00000025887	1353	1353	307570	ENSGALP00000021815	Cadherin, EGF LAG seven-pass G-type receptor 1	CELSR1	142870	0	0	0	0	0	0	0	0	0	0	0	0	0							0						1557.8	0	0	48261	37162	55886	1.09607e-06			9.30658e-06	7.45584e-06	1.08684e-05	1000
1173	ENSGALP00000021816	PDCD6	ENSGALP00000021816	1173	1173	21615	ENSGALP00000021816	Programmed cell death 6	PDCD6	7500700	0	0	0	0	0	0	0	0	0	0	0	0	0							0						299800	128400	18371	1909500	2778400	2366200	0.00021094	8.26205e-05	9.15207e-06	0.000368225	0.000557433	0.000460165	1000
1546	ENSGALP00000035933	CTSB	ENSGALP00000035933	1546	1546	139900	ENSGALP00000021877	ATPase type 13A1	ATP13A1	718890	0	0	0	0	0	0	0	0	0	0	0	0	0							0						62271	17981	76155	128390	262890	171190	4.3814e-05	1.15701e-05	3.79389e-05	2.47585e-05	5.27438e-05	3.3292e-05	1000
549	ENSGALP00000009549	CANX	ENSGALP00000009549	549	549	46891	ENSGALP00000021892	Endoplasmic reticulum protein 44	ERP44	13496000	0	0	0	0	0	0	0	0	0	0	0	0	0							0						1174900	1137900	1563300	3359300	3491600	2769500	0.000826662	0.000732195	0.000778806	0.000647802	0.000700523	0.000538596	1000
1177	ENSGALP00000021907	ANP32E	ENSGALP00000021907	1177	1177	28912	ENSGALP00000021907	Acidic (leucine-rich) nuclear phosphoprotein 32 family, member E	ANP32E	2354500	0	0	0	0	0	0	0	0	0	0	0	0	0							0						121870	86853	73773	790020	743840	538100	8.57479e-05	5.58866e-05	3.67523e-05	0.000152346	0.000149237	0.000104647	1000
391	ENSGALP00000006522	ITM2A	ENSGALP00000006522	391	391	53325	ENSGALP00000021940	Serine palmitoyltransferase, long chain base subunit 1	SPTLC1	609620	0	0	0	0	0	0	0	0	0	0	0	0	0							0						47876	55246	49396	145250	136720	175130	3.36856e-05	3.55487e-05	2.46081e-05	2.80098e-05	2.74303e-05	3.40583e-05	1000
392	ENSGALP00000006532	DNAJA2	ENSGALP00000006532	392	392	1012900	ENSGALP00000021957	Spectrin repeat containing, nuclear envelope 1	SYNE1	481070	0	0	0	0	0	481070	1	0	0	0	0	0	0							0						0	0	0	0	0	0							1000
207	ENSGALP00000003263	CHMP4B	ENSGALP00000003263	207	207	55188	ENSGALP00000022017	Mucolipin 1	MCOLN1	206440	0	0	0	0	0	0	0	0	0	0	0	0	0							0						0	0	0	66803	75942	63692				1.28822e-05	1.52363e-05	1.23864e-05	1000
83	ENSGALP00000001013	RPL22	ENSGALP00000001013	83	83	10014	ENSGALP00000022049	Sec61 beta subunit	SEC61B	13501000	0	0	0	0	0	0	0	0	0	0	0	0	0							0						596400	3101000	639580	2688400	3043500	3432700	0.000419628	0.00199538	0.000318626	0.000518427	0.00061062	0.000667571	1000
566	ENSGALP00000009853	ZNF326	ENSGALP00000009853	566	566	32509	ENSGALP00000022084	Achalasia, adrenocortical insufficiency, alacrimia	AAAS	1071300	0	0	0	0	0	0	0	0	0	0	0	0	0							0						28607	19499	66720	181360	384800	390300	2.01279e-05	1.25469e-05	3.32386e-05	3.49732e-05	7.72028e-05	7.59033e-05	1000
175	ENSGALP00000002864	KATNAL2	ENSGALP00000002864	175	175	18808	ENSGALP00000022148	Myelin basic protein	MBP	28052000	0	0	0	0	0	0	0	0	0	42709	0	0	0			0.000432719				1	0.000432719			0.00351812	#VALUE!	2165600	1609900	4525400	5745000	6272100	7691000	0.00152372	0.00103591	0.00225447	0.00110786	0.00125838	0.0014957	1000	0.00351812
553	ENSGALP00000009605	PA2G4	ENSGALP00000009605	553	553	75322	ENSGALP00000022149	Myotubularin related protein 7	MTMR7	27740	0	0	0	0	0	0	0	0	0	0	0	0	0							0						0	0	0	27740	0	0				5.34934e-06			1000
126	ENSGALP00000001909;ENSGALP00000043213	NUMA1	ENSGALP00000001909;ENSGALP00000043213	126	126	57583	ENSGALP00000022180	Mitochondrial calcium uptake family, member 3	MICU3	62986	0	0	0	0	0	0	0	0	0	0	0	0	0							0						0	0	0	0	31830	31155					6.38608e-06	6.05884e-06	1000
1081	ENSGALP00000036906;ENSGALP00000019616;ENSGALP00000039686;ENSGALP00000009006;ENSGALP00000032942;ENSGALP00000008145	CAMK2A;CAMK2D;CAMK2G;KCC2D;Q9YHB8	ENSGALP00000009006;ENSGALP00000019616;ENSGALP00000036906;ENSGALP00000039686	1081	1081	15545	ENSGALP00000022250	Cytochrome b5 type A (microsomal)	CYB5A	107680000	0	0	0	0	0	0	0	0	0	0	0	0	0							0						7350100	3972700	13599000	25470000	29442000	27848000	0.00517154	0.00255628	0.00677476	0.0049116	0.00590697	0.00541572	1000
1016	ENSGALP00000018410;ENSGALP00000039270	TOP2A;TOP2B	ENSGALP00000018410	1016	1016	25510	ENSGALP00000022251	Translocase of inner mitochondrial membrane 21 homolog	TIMM21	370510	0	0	0	0	0	0	0	0	0	0	0	0	0							0						0	0	0	101060	28664	240790				1.94883e-05	5.75088e-06	4.68274e-05	1000
237	ENSGALP00000003847;ENSGALP00000040992	CTNNA1	ENSGALP00000003847	237;1553	237	51714	ENSGALP00000022309	Thioredoxin-related transmembrane protein 3	TMX3	7883600	0	0	0	0	0	0	0	0	0	0	0	0	0							0						428580	302950	580000	2379300	2365000	1827800	0.00030155	0.000194937	0.000288945	0.000458821	0.000474492	0.00035546	1000
117	ENSGALP00000001795	COQ9	ENSGALP00000001795	117	117	60838	ENSGALP00000022342	Cadherin 7, type 2 (CDH7	CDH7	94756	0	0	0	0	0	0	0	0	0	0	0	0	0							0						0	0	0	59785	34971	0				1.15288e-05	7.01626e-06		1000
1596	ENSGALP00000038209	ERP29	ENSGALP00000038209	1596	1596	26001	ENSGALP00000022386	Splicing factor, arginine/serine-rich 7	SRSF7	7307600	0	0	115270	0	0	0	1	0	0	0	0	0	0							0						376180	463030	978900	2352300	1893300	1128500	0.000264681	0.000297942	0.000487669	0.000453614	0.000379854	0.000219464	1000
1759	ENSGALP00000042370	TSPAN13	ENSGALP00000042370	1759	1759	17566	ENSGALP00000022401	Translocase of outer mitochondrial membrane 40 homolog	TOMM40L	833130	0	0	0	0	0	0	0	0	0	0	0	0	0							0						0	0	0	284460	282660	266010				5.48548e-05	5.67103e-05	5.17321e-05	1000
940	ENSGALP00000016623	NAP1L1	ENSGALP00000016623	940	940	15457	ENSGALP00000022414	Synaptojanin 2 binding protein	SYNJ2BP	1766900	0	0	0	0	0	0	0	0	0	0	0	0	0							0						243080	66174	189250	427250	379380	461800	0.000171031	4.25804e-05	9.42807e-05	8.23902e-05	7.61153e-05	8.98082e-05	1000
145	ENSGALP00000002302	ATAD3A	ENSGALP00000002302	145	145	89238	ENSGALP00000022434	AFG3 ATPase family member 3-like 2	AFG3L2	340540	0	0	0	0	0	0	0	0	0	0	0	0	0							0						0	8808.6	19797	58145	75430	178360		5.668e-06	9.86248e-06	1.12126e-05	1.51336e-05	3.46864e-05	1000
797	ENSGALP00000013963	SMC3	ENSGALP00000013963	797	797	48850	ENSGALP00000022449	Protein tyrosine phosphatase, non-receptor type 2 (PTPN2	PTPN2	90242	0	0	0	0	0	0	0	0	0	0	0	0	0							0						0	0	0	25375	32690	32176				4.89328e-06	6.55862e-06	6.2574e-06	1000
1335	ENSGALP00000025393	PTCD3	ENSGALP00000025393	1335	1335	25655	ENSGALP00000022457	SEH1-like	SEH1L	135660	0	0	0	0	0	0	0	0	0	0	0	0	0							0						0	0	0	0	63546	72112					1.27493e-05	1.40239e-05	1000
766	ENSGALP00000013359	ANXA4	ENSGALP00000013359	414;766	766	56439	ENSGALP00000022465	Prenylcysteine oxidase 1	PCYOX1	18541000	0	0	0	0	0	0	0	0	0	0	0	0	0							0						1162300	563930	1634200	4819200	5288100	5072900	0.000817796	0.000362867	0.000814127	0.000929327	0.00106096	0.000986548	1000
417	ENSGALP00000006965	VPS35	ENSGALP00000006965	417	417	42876	ENSGALP00000022493	Vacuolar protein sorting 45A	Q5ZJG4	146610	0	0	0	0	0	0	0	0	0	0	0	0	0							0						14203	0	0	15647	97409	19349	9.99325e-06			3.01734e-06	1.95433e-05	3.76288e-06	1000
1763	ENSGALP00000042451	IFITM5	ENSGALP00000042451	1763	1763	40446	ENSGALP00000022525	Pre-mRNA processing factor 19	PRPF19	3081700	0	0	0	0	0	0	0	0	0	0	0	0	0							0						203130	107810	282060	608510	964270	915950	0.000142923	6.93716e-05	0.000140517	0.000117344	0.000193462	0.000178129	1000
1336	ENSGALP00000025396	UBE2J1	ENSGALP00000025396	1336	1336	106170	ENSGALP00000022545	BCL2-associated transcription factor 1	BCLAF1	95213	0	0	0	0	0	0	0	0	0	0	0	0	0							0						0	0	0	0	0	95213						1.85165e-05	1000
1004	ENSGALP00000018120	PSMD14	ENSGALP00000018120	1004	1004	34530	ENSGALP00000022600	Sarcoglycan, beta (43kDa dystrophin-associated glycoprotein)	SGCB	468670	0	0	0	0	0	0	0	0	0	0	0	0	0							0						53237	0	58900	123410	113180	119940	3.74576e-05		2.93428e-05	2.37982e-05	2.27074e-05	2.33252e-05	1000
1272	ENSGALP00000024250	FAAH	ENSGALP00000024250	1272	1272	14545	ENSGALP00000022626	Ribosomal protein S12	RPS12	4370200	0	0	0	0	0	0	0	0	0	0	0	0	0							0						474610	395690	633790	792820	1354200	719050	0.000333936	0.000254611	0.000315742	0.000152886	0.000271694	0.000139837	1000
872	ENSGALP00000015455	PNPLA8	ENSGALP00000015455	872	872	113800	ENSGALP00000022645	Zinc finger protein 532	ZNF532	23279	0	0	0	0	0	0	0	0	0	0	0	0	0							0						0	0	0	0	23279	0					4.67049e-06		1000
1542	ENSGALP00000035834	MTDH	ENSGALP00000035834	1542	1542	107480	ENSGALP00000022646	Erythrocyte membrane protein band 4.1-like 2	EPB41L2	1145600	0	0	0	0	0	0	0	0	0	0	0	0	0							0						74701	50773	68596	298620	293020	359920	5.25597e-05	3.26705e-05	3.41732e-05	5.75854e-05	5.87889e-05	6.99951e-05	1000
282	ENSGALP00000004576;ENSGALP00000042272	TARDBP	ENSGALP00000004576;ENSGALP00000042272	282	282	348850	ENSGALP00000022664	Laminin, alpha 2	LAMA2	115310	0	0	10572	0	0	0	1	0	0	0	0	0	0							0						17198	5898.8	7551.5	25269	16481	32338	1.21005e-05	3.79565e-06	3.76201e-06	4.87284e-06	3.3066e-06	6.28891e-06	1000
229	ENSGALP00000040874;ENSGALP00000003712	ORMDL1;ORMDL2	ENSGALP00000003712;ENSGALP00000040874	229	229	23141	ENSGALP00000022733	Transmembrane protein 126A	TMEM126A	789170	0	0	0	0	0	0	0	0	0	0	0	0	0							0						0	0	0	280700	137210	371260				5.41298e-05	2.75286e-05	7.22005e-05	1000
1361	ENSGALP00000026077	AGPAT3	ENSGALP00000026077	1361	1361	28264	ENSGALP00000022759	OCIA domain containing 1	OCIAD1	3054000	0	0	0	0	0	0	0	0	0	0	0	0	0							0						226650	413530	225820	739250	859360	589380	0.000159471	0.000266091	0.000112499	0.000142556	0.000172414	0.000114619	1000
641	ENSGALP00000011160	ATP5L	ENSGALP00000011160	641	641	16973	ENSGALP00000022815	Cytochrome c oxidase subunit Va	COX5A	60657000	0	0	0	0	0	0	0	0	0	0	0	0	0							0						3490700	2177900	4711500	17751000	16945000	15581000	0.00245606	0.0014014	0.00234718	0.00342308	0.00339969	0.0030301	1000
725	ENSGALP00000012747	COX7B	ENSGALP00000012747	725	725	34088	ENSGALP00000022816	Cytochrome b5 reductase 3	CYB5R3	22201000	0	0	0	0	0	0	0	0	0	0	0	0	0							0						842230	762070	994530	6312800	6908900	6381000	0.000592594	0.000490363	0.000495455	0.00121735	0.00138614	0.00124094	1000
165	ENSGALP00000002580	SCAMP2	ENSGALP00000002580	165	165	18576	ENSGALP00000022870	Translocator protein (18kDa)	TSPO	5454600	0	0	0	0	0	0	0	0	0	0	0	0	0							0						125560	0	153290	1819000	1662600	1694200	8.83442e-05		7.63661e-05	0.000350773	0.000333569	0.000329478	1000
440	ENSGALP00000007493	PTCD1	ENSGALP00000007493	440	440	52220	ENSGALP00000022917	SAMM50 sorting and assembly machinery component	SAMM50	3527700	0	0	0	0	0	0	0	0	0	0	0	0	0							0						148650	45469	204730	1009300	958850	1160700	0.00010459	2.92576e-05	0.000101992	0.000194632	0.000192375	0.000225726	1000
1284	ENSGALP00000024468	RPS15	ENSGALP00000024468	1284	1284	62714	ENSGALP00000022999	Solute carrier family 30 (zinc transporter), member 9	SLC30A9	1042200	0	0	0	0	0	0	0	0	0	0	0	0	0							0						0	10699	0	315680	307920	407860		6.8844e-06		6.08753e-05	6.17783e-05	7.93182e-05	1000
58	ENSGALP00000000581	KDM5B	ENSGALP00000000581	58	58	28275	ENSGALP00000023000	Transmembrane protein 33	TMEM33	5979100	0	0	0	0	0	0	0	0	0	28128	0	0	0			0.000284987				1	0.000284987			0.00231702	#VALUE!	302110	141150	467420	1673000	1896000	1471300	0.000212565	9.08246e-05	0.00023286	0.000322619	0.000380396	0.00028613	1000	0.00231702
1215	ENSGALP00000023013	M6PR	ENSGALP00000023013	1215	1215	32349	ENSGALP00000023013	Mannose-6-phosphate receptor (cation dependent)	M6PR	4231100	0	0	0	0	0	0	0	0	0	0	0	0	0							0						132090	246020	105490	1153300	1438500	1155700	9.29387e-05	0.000158304	5.25531e-05	0.000222401	0.000288607	0.000224754	1000
287	ENSGALP00000004641	PRPF8	ENSGALP00000004641	287	287	53636	ENSGALP00000023047	Corepressor interacting with RBPJ 1	CIR1	54376	0	0	0	0	0	0	0	0	0	0	0	0	0							0						0	54376	0	0	0	0		3.49889e-05					1000
1751	ENSGALP00000042245	SCARA3	ENSGALP00000042245	1751	1751	120010	ENSGALP00000023081	Suppressor of Ty 5 homolog	SUPT5H	60522	0	0	0	0	0	0	0	0	0	0	0	0	0							0						10061	0	0	14668	0	35793	7.07894e-06			2.82855e-06		6.96081e-06	1000
953;1018;1563;1579;1637	ENSGALP00000010080;ENSGALP00000016978;ENSGALP00000018454;ENSGALP00000036688;ENSGALP00000036691;ENSGALP00000037524;ENSGALP00000039436	TUBA4A;NONE;TUBA1B;TUBA3C;TUBAL3;TUBAT	ENSGALP00000036688;ENSGALP00000037524;ENSGALP00000016978;ENSGALP00000036691;ENSGALP00000018454;ENSGALP00000039436	953;1018;1563;1579;1637	953;1018;1563;1579;1637	71622	ENSGALP00000023085	Actinin, alpha 4	ACTN4	4635200	8544.6	0	0	0	0	0	1	117550	58666	224890	62335	43704	25005	0.00158755	0.00216965	0.00227854	0.00263729	0.00100797	0.000913412	6	0.00176573	0.000709667	0.00028972			302770	195750	336000	999550	1108300	1152200	0.000213029	0.000125958	0.000167389	0.000192752	0.000222359	0.000224073	1000
1286	ENSGALP00000024537;ENSGALP00000036140	ATP1B1	ENSGALP00000024537;ENSGALP00000036140	1286	1286	14167	ENSGALP00000023089	Ribosomal protein, large, P2	RPLP2	27822000	0	0	0	0	0	0	0	0	0	0	0	0	0							0						430480	208750	266360	8137700	8551700	10227000	0.000302886	0.000134323	0.000132695	0.00156926	0.00171573	0.00198889	1000
200	ENSGALP00000003157	NDUFB6	ENSGALP00000003157	200	200	27120	ENSGALP00000023091	NADH dehydrogenase (ubiquinone) flavoprotein 2, 24kDa	NDUFV2	17261000	0	0	0	0	0	0	0	0	0	0	0	0	0							0						690600	584870	985220	5081000	5186900	4732800	0.000485907	0.000376342	0.000490817	0.000979812	0.00104065	0.000920407	1000
446	ENSGALP00000007580	DHRS7B	ENSGALP00000007580	446	446	47330	ENSGALP00000023165	Heterogeneous nuclear ribonucleoprotein K	HNRNPK	1976900	0	0	0	0	0	0	0	0	0	0	0	0	0							0						248040	165780	242070	420430	449070	451510	0.000174521	0.000106673	0.000120595	8.10751e-05	9.00973e-05	8.7807e-05	1000
1569	ENSGALP00000036963	RPL15	ENSGALP00000036963	1569	1569	73728	ENSGALP00000023177	Solute carrier family 34 (type II sodium/phosphate contransporter), member 2	SLC34A2	3391700	0	0	0	0	0	0	0	0	0	0	0	0	16591						0.000606056	1	0.000606056			0.00492739	#VALUE!	184600	172750	259550	924450	934630	899110	0.000129885	0.000111158	0.000129303	0.00017827	0.000187516	0.000174854	1000	0.00492739
980	ENSGALP00000017578	AGR2	ENSGALP00000017578	980	980	24572	ENSGALP00000023188	Heterogeneous nuclear ribonucleoprotein A/B	HNRNPAB	508500	0	0	0	0	0	0	0	0	0	0	0	0	0							0						41584	0	120190	257910	88816	0	2.92586e-05		5.98763e-05	4.9735e-05	1.78192e-05		1000
520	ENSGALP00000008866;ENSGALP00000039717	Q5F3A3;TCOF1	ENSGALP00000008866;ENSGALP00000039717	520	520	87674	ENSGALP00000023214	DEAH (Asp-Glu-Ala-His) box helicase 15	DHX15	292200	0	0	0	0	0	0	0	0	0	0	0	0	0							0						0	9763.7	0	78098	69592	134740		6.28257e-06		1.50603e-05	1.39623e-05	2.62034e-05	1000
1687	ENSGALP00000041075	TMEM115	ENSGALP00000041075	1687	1687	17665	ENSGALP00000023244	Family with sequence similarity 162, member A	FAM162A	4306200	0	0	0	0	0	0	0	0	0	0	0	0	0							0						146810	93591	277550	1224900	1454800	1108600	0.000103296	6.02222e-05	0.00013827	0.000236208	0.000291878	0.000215594	1000
244	ENSGALP00000003923	RHOT2	ENSGALP00000003923	244	244	48087	ENSGALP00000023262	TAP binding protein-like	TAPBPL	131150	0	0	0	0	0	0	0	0	0	0	0	0	0							0						0	17120	0	49283	0	64750		1.10161e-05		9.50366e-06		1.25922e-05	1000
1322	ENSGALP00000025130	RPS23	ENSGALP00000025130	1322	1322	12850	ENSGALP00000023265	Vesicle-associated membrane protein 1 (synaptobrevin 1)	VAMP1	1885700	0	0	0	0	0	0	0	0	0	0	0	0	0							0						249140	149210	0	764260	723120	0	0.000175295	9.60109e-05		0.000147379	0.00014508		1000
1513	ENSGALP00000034255	NDUFA8	ENSGALP00000034255	1513	1513	13564	ENSGALP00000023266	Ribosomal protein S20	RPS20	11508000	0	0	0	0	0	0	0	0	0	0	0	0	0							0						940390	1512300	1709700	2538300	2462000	2345200	0.00066166	0.000973107	0.000851739	0.000489482	0.000493953	0.000456081	1000
836	ENSGALP00000014758	MAN1B1	ENSGALP00000014758	836	836	67896	ENSGALP00000023267	Retinol saturase (all-trans-retinol 13,14-reductase)	RETSAT	107180	0	0	0	0	0	0	0	0	0	0	0	0	0							0						0	0	34470	15658	0	57051			1.71723e-05	3.01947e-06		1.10949e-05	1000
1281	ENSGALP00000024396	ALDH1A1	ENSGALP00000024396	441;663;1281	1281	34919	ENSGALP00000023278	Glyceraldehyde-3-phosphate dehydrogenase	GAPDH	33195000	3305800	0	542090	0	0	0	2	501580	71020	475680	138780	0	98815	0.00677402	0.00262654	0.00481949	0.00587155		0.00360963	5	0.00474024	0.00167096	0.000682165			2692400	1962700	3789400	6252900	7194200	6169600	0.00189438	0.00126292	0.00188781	0.0012058	0.00144338	0.00119983	1000
1083	ENSGALP00000019635	ANK2	ENSGALP00000019635	1083;1660	1083	71521	ENSGALP00000023281	NOP2 nucleolar protein	NOP2	695910	0	0	0	0	0	0	0	0	0	0	0	695910	0					0.0160501		1	0.0160501			0.130492	#VALUE!	0	0	0	0	0	0							1000	0.130492
1726	ENSGALP00000041790	RAB8A	ENSGALP00000041790	811;1726	1726	63736	ENSGALP00000023288	Poly(A) binding protein, cytoplasmic 1	PABPC1	224490	0	0	0	0	0	0	0	0	0	0	0	0	0							0						22239	23456	58508	62674	36260	21349	1.56474e-05	1.5093e-05	2.91475e-05	1.2086e-05	7.27487e-06	4.15183e-06	1000
760	ENSGALP00000013213	COPG2	ENSGALP00000013213	541;760	760	219180	ENSGALP00000023294	Chromodomain helicase DNA binding protein 4	CHD4	38319	0	0	0	0	0	0	0	0	0	0	0	0	0							0						0	0	0	10779	16608	10932				2.07861e-06	3.33208e-06	2.12599e-06	1000
623	ENSGALP00000010887	PVRL1	ENSGALP00000010887	623	623	51935	ENSGALP00000023303	Zinc finger protein 384 (ZNF384	ZNF384	111300	0	0	0	0	0	0	0	0	0	0	0	0	0							0						0	0	24470	0	43256	43569			1.21905e-05		8.67849e-06	8.47304e-06	1000
1476	ENSGALP00000031272	PPP1CB	ENSGALP00000031272	1476	1476	55436	ENSGALP00000023319	Catalase	CAT	857100	0	0	0	0	0	0	0	0	0	0	0	0	0							0						29590	78158	43140	374950	153630	177640	2.08196e-05	5.02917e-05	2.14915e-05	7.23048e-05	3.08229e-05	3.45464e-05	1000
962	ENSGALP00000017218	GALC	ENSGALP00000017218	962	962	81240	ENSGALP00000023347	Leprecan-like 2	LEPREL2	52877	0	0	0	0	0	0	0	0	0	0	0	0	0							0						0	0	0	0	40954	11923					8.21664e-06	2.31872e-06	1000
1750	ENSGALP00000042206	CADM3	ENSGALP00000042206	1750	1750	52281	ENSGALP00000023364	NOP56 ribonucleoprotein	NOP56	359930	0	0	0	0	0	0	0	0	0	0	0	0	0							0						25181	40055	0	59233	110430	125040	1.77174e-05	2.57739e-05		1.14224e-05	2.21557e-05	2.4317e-05	1000
1765	ENSGALP00000042475	PURA	ENSGALP00000042475	1765	1765	26620	ENSGALP00000023396	Triosephosphate isomerase 1	TPI1	2942300	91203	0	0	0	0	0	1	0	0	0	0	0	0							0						165430	90647	194210	1038900	681290	680620	0.000116397	5.83279e-05	9.67516e-05	0.00020034	0.000136688	0.000132363	1000
708	ENSGALP00000012361	MYO3A	ENSGALP00000012361	708;886	708	47324	ENSGALP00000023398	Enolase 2 (gamma, neuronal)	ENO2	101970	101970	0	0	0	0	0	1	0	0	0	0	0	0							0						0	0	0	0	0	0							1000
1405	ENSGALP00000027072	UXS1	ENSGALP00000027072	1405	1405	23004	ENSGALP00000023410	Syntaxin 1A (brain)	STX1A	342970	0	0	0	0	0	0	0	0	0	0	0	0	0							0						101190	43356	0	0	0	198430	7.11975e-05	2.78979e-05				3.85895e-05	1000
1829	REV__ENSGALP00000008036	REV__ENSGALP00000008036	REV__ENSGALP00000008036	1829	1829	30630	ENSGALP00000023446	Prohibitin 2	PHB2	28619000	0	0	0	0	0	0	0	0	0	0	0	0	0							0						2142000	1627700	3109500	7053200	7176800	7509700	0.00150711	0.00104736	0.00154909	0.00136013	0.00143989	0.00146044	1000
57;191	ENSGALP00000000526;ENSGALP00000003089	VCP	ENSGALP00000003089;ENSGALP00000000526	57;191	57;191	45085	ENSGALP00000023468	Cell adhesion molecule 1	CADM1	6359000	0	0	0	0	0	0	0	0	0	0	0	0	0							0						420150	354140	628930	1592800	1850100	1512900	0.000295618	0.000227876	0.000313321	0.000307153	0.000371187	0.00029422	1000
1752	ENSGALP00000042257	HTRA2	ENSGALP00000042257	1752	1752	45576	ENSGALP00000023548	Death associated protein 3	DAP3	688070	0	0	0	0	0	0	0	0	0	0	0	0	0							0						47305	22549	0	270020	185160	163040	3.32839e-05	1.45094e-05		5.20702e-05	3.71488e-05	3.17071e-05	1000
455	ENSGALP00000007705	RPS4X	ENSGALP00000007705	455	455	684770	ENSGALP00000023576	G protein-coupled receptor 98	GPR98	33042	0	0	0	0	0	0	0	0	0	27537	977.57	0	0			0.000278999	4.13593e-05			2	0.000160179	0.000168037	6.86007e-05	0.0013023	0.000981653	0	0	0	0	4527	0					9.08256e-07		1000	0.0228619
423	ENSGALP00000007035	SCAMP1	ENSGALP00000007035	423	423	73638	ENSGALP00000023635	Lamin B1	LMNB1	4930600	0	0	0	0	0	0	0	0	0	0	0	0	0							0						258660	257460	313710	1056000	1390000	1654800	0.000181994	0.000165666	0.000156284	0.000203637	0.000278877	0.000321816	1000
354	ENSGALP00000005971	ANXA2	ENSGALP00000005971	354	354	80375	ENSGALP00000023776	Neurolysin (metallopeptidase M3 family)	NLN	0	0	0	0	0	0	0	0	0	0	0	0	0	0							0						0	0	0	0	0	0							1000
523	ENSGALP00000008922	HCCS	ENSGALP00000008922	523	523	88540	ENSGALP00000023784	Erythrocyte membrane protein band 4.1-like 3	EPB41L3	561220	0	0	0	0	0	0	0	0	0	0	0	0	0							0						18994	14892	17151	158730	173090	178370	1.33642e-05	9.58243e-06	8.54429e-06	3.06093e-05	3.47272e-05	3.46884e-05	1000
307	ENSGALP00000005212;ENSGALP00000024133	HDAC1;HDAC2	ENSGALP00000005212;ENSGALP00000024133	307	307	164330	ENSGALP00000023810	Protein tyrosine phosphatase, receptor type, K	PTPRK	1006200	0	0	0	0	0	0	0	0	0	0	0	0	0							0						83228	26177	58794	251070	295740	291200	5.85594e-05	1.68439e-05	2.929e-05	4.8416e-05	5.93346e-05	5.66309e-05	1000
272	ENSGALP00000004467	PEX14	ENSGALP00000004467	272	272	84776	ENSGALP00000023825	Solute carrier family 30 (zinc transporter), member 5	SLC30A5	176740	0	0	0	0	0	0	0	0	0	0	0	0	0							0						76219	0	0	46316	28246	25961	5.36278e-05			8.93151e-06	5.66702e-06	5.04874e-06	1000
1159	ENSGALP00000021513	CLPTM1L	ENSGALP00000021513	1159	1159	68298	ENSGALP00000023850	ATPase, H+ transporting, lysosomal 70 kDa, V1 subunit A	ATP6V1A	449940	0	0	0	0	0	0	0	0	0	0	0	0	0							0						17819	38376	55917	68495	60316	209020	1.25375e-05	2.46935e-05	2.78568e-05	1.32085e-05	1.21013e-05	4.0649e-05	1000
937	ENSGALP00000016566	ENTPD5	ENSGALP00000016566	937	937	56173	ENSGALP00000023917	3-oxoacid CoA transferase 1	OXCT1	337040	0	0	0	0	0	0	0	0	0	0	0	0	0							0						20180	19259	0	127710	31927	137970	1.41987e-05	1.23924e-05		2.46274e-05	6.40554e-06	2.68316e-05	1000
1391	ENSGALP00000026509	DDX1	ENSGALP00000026509	1391	1391	60792	ENSGALP00000023934	V-yes-1 Yamaguchi sarcoma viral oncogene homolog 1	YES1	84590	0	0	0	0	0	0	0	0	0	0	0	0	0							0						0	9199.7	0	0	0	75390		5.91966e-06				1.46614e-05	1000
508	ENSGALP00000008589	SORBS1	ENSGALP00000008589	508	508	57668	ENSGALP00000023936	3-hydroxy-3-methylglutaryl-CoA synthase 1 (soluble) (HMGCS1	HMGCS1	999660	0	0	0	0	0	0	0	0	0	668630	115750	215280	0			0.00677442	0.00489719	0.00496511		3	0.00554557	0.00106476	0.000434684	0.0450869	0.00702029	0	0	0	0	0	0							1000	0.0450869
1442	ENSGALP00000028012	UQCRH	ENSGALP00000028012	1442	1442	113780	ENSGALP00000023944	Nicotinamide nucleotide transhydrogenase	NNT	9194200	0	0	0	0	0	0	0	0	0	0	0	0	0							0						487230	294870	496750	2593300	2676100	2646000	0.000342816	0.000189738	0.000247471	0.000500088	0.000536908	0.000514579	1000
575	ENSGALP00000009988	LSS	ENSGALP00000009988	575	575	43151	ENSGALP00000023950	Gap junction protein, alpha 1, 43kDa	GJA1	988440	0	0	0	0	0	0	0	0	0	0	0	0	0							0						45573	47367	70762	299530	188570	336640	3.20652e-05	3.04789e-05	3.52522e-05	5.77609e-05	3.7833e-05	6.54678e-05	1000
1201	ENSGALP00000022545	BCLAF1	ENSGALP00000022545	1201	1201	43014	ENSGALP00000023990	Golgi-associated PDZ and coiled-coil motif containing	GOPC	118460	0	0	0	0	0	0	0	0	0	0	0	0	0							0						0	0	0	23132	31117	64209				4.46074e-06	6.24303e-06	1.2487e-05	1000
1197	ENSGALP00000022457	SEH1L	ENSGALP00000022457	1197	1197	129630	ENSGALP00000023991	Integrin, alpha 2	ITGA2	218900	0	0	0	0	0	0	0	0	0	0	0	0	0							0						11667	16240	12367	20983	80407	77237	8.20892e-06	1.04498e-05	6.161e-06	4.04633e-06	1.61321e-05	1.50206e-05	1000
1441	ENSGALP00000027997	DPM1	ENSGALP00000027997	1441	1441	214380	ENSGALP00000024043	Growth regulation by estrogen in breast cancer-like	GREB1L	3576900	0	0	0	0	0	0	0	0	0	0	0	0	0							0						360240	262940	257600	1210000	1486200	0	0.000253465	0.000169192	0.000128331	0.000233335	0.000298178		1000
767	ENSGALP00000013377	ALDH7A1	ENSGALP00000013377	767	767	26303	ENSGALP00000024069	RAB, member of RAS oncogene family-like 3	RABL3	631960	0	0	0	0	0	0	0	0	0	0	0	0	0							0						0	42422	49079	136040	226200	178210		2.72969e-05	2.44502e-05	2.62337e-05	4.53827e-05	3.46572e-05	1000
1588	ENSGALP00000037814	ITGA6	ENSGALP00000037814	1588	1588	121790	ENSGALP00000024075	Zinc finger protein 518B	ZNF518B	1000700	0	0	0	0	0	0	0	0	0	0	0	0	0							0						27971	0	50090	84186	300590	537820	1.96804e-05		2.49539e-05	1.62343e-05	6.03076e-05	0.000104592	1000
924	ENSGALP00000016414	ARFIP1	ENSGALP00000016414	924	924	181150	ENSGALP00000024116	IQ motif containing GTPase activating protein 2	IQGAP2	129400	0	0	0	0	0	0	0	0	0	0	0	0	0							0						4261.2	6753.6	4796.5	27854	44879	40857	2.99819e-06	4.34568e-06	2.38952e-06	5.37132e-06	9.00411e-06	7.94563e-06	1000
1131	ENSGALP00000020874	PRPF4B	ENSGALP00000020874	1131	1131	202470	ENSGALP00000024147	Laminin, alpha 4	LAMA4	4904900	360370	0	1763200	587750	0	2182900	4	0	0	0	0	0	0							0						0	0	0	4261.4	0	6515.2				8.21762e-07		1.26704e-06	1000
1703	ENSGALP00000041385	LEPREL4	ENSGALP00000041385	1703	1703	38387	ENSGALP00000024162	Syntaxin 18	STX18	326400	0	0	0	0	0	0	0	0	0	0	0	0	0							0						0	0	45355	75469	126860	78716			2.2595e-05	1.45533e-05	2.5452e-05	1.53082e-05	1000
927	ENSGALP00000016481;ENSGALP00000014280	SEC23A;SEC23B	ENSGALP00000014280;ENSGALP00000016481	927	927	143230	ENSGALP00000024194	Niemann-Pick disease, type C1	NPC1	198490	0	0	0	0	0	0	0	0	0	0	0	0	0							0						6565.5	0	0	81939	80336	29654	4.6195e-06			1.5801e-05	1.61179e-05	5.76694e-06	1000
104	ENSGALP00000001470	AP3D1	ENSGALP00000001470	104	104	60792	ENSGALP00000024202	KIAA1919	KIAA1919	180380	0	0	0	0	0	0	0	0	0	0	0	0	0							0						19050	16023	0	75417	0	69888	1.34036e-05	1.03102e-05		1.45433e-05		1.35914e-05	1000
758;1636	ENSGALP00000013180;ENSGALP00000039434	RTN4	ENSGALP00000013180;ENSGALP00000039434	758;1636	758;1636	53468	ENSGALP00000024250	Fatty acid amide hydrolase	FAAH	6376000	0	0	0	0	0	0	0	0	0	0	0	0	0							0						601000	466410	893390	1489700	1792100	1133500	0.000422865	0.000300117	0.000445069	0.000287272	0.000359551	0.000220436	1000
926	ENSGALP00000016464	HGSNAT	ENSGALP00000016464	926	926	65697	ENSGALP00000024253	Cell division cycle 40	CDC40	140110	0	0	0	0	0	0	0	0	0	0	0	0	0							0						0	0	0	45485	56595	38028				8.77126e-06	1.13547e-05	7.39546e-06	1000
139	ENSGALP00000002228	JAM3	ENSGALP00000002228	139	139	41296	ENSGALP00000024265	UDP-Gal:betaGlcNAc beta 1,4- galactosyltransferase, polypeptide 4	B4GALT4	1694800	0	0	0	0	0	0	0	0	0	0	0	0	0							0						68811	79778	123000	442490	504130	476570	4.84155e-05	5.13341e-05	6.12762e-05	8.53291e-05	0.000101144	9.26806e-05	1000
1594	ENSGALP00000038130	PFN2	ENSGALP00000038130	1594	1594	33923	ENSGALP00000024283	Ribosomal protein S6	RPS6	5022900	0	0	0	0	0	0	0	0	0	58227	0	0	23525			0.000589944			0.000859349	2	0.000724646	0.000190498	7.77706e-05	0.00589157	0.00134978	592300	358710	480220	1151700	1231300	1127000	0.000416743	0.000230816	0.000239236	0.000222092	0.000247037	0.000219172	1000	0.00589157
216	ENSGALP00000003441	PPL	ENSGALP00000003441	216	216	88012	ENSGALP00000024300	Zinc finger and BTB domain containing 20	ZBTB20	6876.8	0	0	0	0	0	0	0	0	0	0	0	0	0							0						0	0	0	6876.8	0	0				1.32611e-06			1000
1690	ENSGALP00000041099	TMEM38B	ENSGALP00000041099	1690	1690	130730	ENSGALP00000024331	Tight junction protein 2	TJP2	641740	0	0	0	0	0	0	0	0	0	0	0	0	0							0						36941	25319	34828	140760	235170	168720	2.59917e-05	1.62918e-05	1.73506e-05	2.71439e-05	4.71824e-05	3.28117e-05	1000
428	ENSGALP00000007204	PLOD1	ENSGALP00000007204	428	428	100460	ENSGALP00000024371	Cadherin 2, type 1, N-cadherin (neuronal)	CDH2	1571700	0	0	0	0	0	0	0	0	0	0	0	0	0							0						32123	20272	68851	606790	432130	411510	2.26018e-05	1.30443e-05	3.43002e-05	0.000117012	8.66986e-05	8.00281e-05	1000
129	ENSGALP00000001995	SNAP29	ENSGALP00000001995	129	129	117150	ENSGALP00000024387	Desmoglein 2	DSG2	46462	0	0	0	0	0	0	0	0	0	0	0	0	0							0						0	0	0	0	21531	24931					4.31978e-06	4.84844e-06	1000
242	ENSGALP00000003914	UQCRC2	ENSGALP00000003914	242	242	55837	ENSGALP00000024396	Aldehyde dehydrogenase 1 family, member A1	ALDH1A1	0	0	0	0	0	0	0	0	0	0	0	0	0	0							0						0	0	0	0	0	0							1000
1132	ENSGALP00000020879	SLC22A23	ENSGALP00000020879	1132	1132	211950	ENSGALP00000024430	Proprotein convertase subtilisin/kexin type 5	PCSK5	64893	0	0	0	0	0	0	0	0	0	0	0	0	0							0						9671.9	1905.1	2080.1	4386.9	21853	24996	6.80516e-06	1.22586e-06	1.03627e-06	8.45963e-07	4.38439e-06	4.86108e-06	1000
506	ENSGALP00000008530	EIF3F	ENSGALP00000008530	506	506	42234	ENSGALP00000024446	Guanine nucleotide binding protein (G protein), alpha Q	GNAQ	2053100	0	0	0	0	0	0	0	0	0	0	0	0	0							0						128150	73755	232980	588650	468350	561170	9.01666e-05	4.74585e-05	0.000116066	0.000113514	9.39655e-05	0.000109133	1000
170	ENSGALP00000002786;ENSGALP00000042423	MXRA7	ENSGALP00000002786;ENSGALP00000042423	170	170	16909	ENSGALP00000024468	Ribosomal protein S15	RPS15	1050500	0	0	0	0	0	0	0	0	0	0	0	0	0							0						0	0	0	343890	393100	313550				6.63152e-05	7.8868e-05	6.09774e-05	1000
1189	ENSGALP00000022342;ENSGALP00000022341	CDH7	ENSGALP00000022341;ENSGALP00000022342	1189	1189	83888	ENSGALP00000024499	Dystrobrevin, alpha	DTNA	38462	0	0	0	0	0	0	0	0	0	0	0	0	0							0						0	0	0	0	38462	0					7.71666e-06		1000
507	ENSGALP00000008578	COPB2	ENSGALP00000008578	507	507	28469	ENSGALP00000024537	ATPase, Na+/K+ transporting, beta 1 polypeptide	ATP1B1	60969000	0	0	0	0	0	0	0	0	0	0	0	0	0							0						5555800	4463900	7313100	13935000	15903000	13798000	0.00390907	0.00287235	0.00364324	0.0026872	0.00319063	0.00268335	1000
712	ENSGALP00000012472;ENSGALP00000032625	NCL	ENSGALP00000012472;ENSGALP00000032625	712	712	72550	ENSGALP00000024624	Translocase of outer mitochondrial membrane 70 homolog A	TOMM70A	2056900	0	0	0	0	0	0	0	0	0	0	0	0	0							0						113590	130980	210880	508790	565820	526800	7.99221e-05	8.42806e-05	0.000105056	9.81143e-05	0.000113521	0.000102449	1000
1102	ENSGALP00000020185	C14ORF166	ENSGALP00000020185	1102	1102	117000	ENSGALP00000024648	Leucyl/cystinyl aminopeptidase	LNPEP	311130	0	0	0	0	0	0	0	0	0	0	0	0	0							0						0	10321	32609	77329	108670	82198		6.64117e-06	1.62452e-05	1.4912e-05	2.18026e-05	1.59854e-05	1000
317	ENSGALP00000005362	RHOT1	ENSGALP00000005362	317	317	87961	ENSGALP00000024664	SEC63 homolog	SEC63	434230	0	0	0	0	0	0	0	0	0	0	0	0	0							0						32995	22897	59470	85694	127500	105670	2.32153e-05	1.47333e-05	2.96268e-05	1.65251e-05	2.55804e-05	2.05501e-05	1000
697	ENSGALP00000012144	ACBD5	ENSGALP00000012144	697	697	26514	ENSGALP00000024677	Chromosome 3 open reading frame, human C6orf203 (C3H6ORF203	C3H6ORF203	357510	0	0	0	0	0	0	0	0	0	0	0	0	0							0						0	0	0	110490	133530	113490				2.13067e-05	2.67902e-05	2.20709e-05	1000
49	ENSGALP00000000410	SLC25A22	ENSGALP00000000410	49	49	23760	ENSGALP00000024691	Clathrin, light chain A	CLTA	3394600	0	0	0	0	0	0	0	0	0	0	0	0	0							0						0	0	0	1161200	1489000	744310				0.000223924	0.000298739	0.000144749	1000
61	ENSGALP00000000615	KPNB1	ENSGALP00000000615	61	61	48195	ENSGALP00000024696	TRNA methyltransferase 10 homolog C	TRMT10C	42774	0	0	0	0	0	0	0	0	0	0	0	0	0							0						0	0	0	0	42774	0					8.58178e-06		1000
584	ENSGALP00000010193	TSG101	ENSGALP00000010193	584	584	12542	ENSGALP00000024700	Complexin 1	CPLX1	117920	0	0	0	0	0	0	0	0	0	0	0	117920	0					0.00271965		1	0.00271965			0.0221114	#VALUE!	0	0	0	0	0	0							1000	0.0221114
1685	ENSGALP00000041067	LGALS1	ENSGALP00000041067	1685	1685	17844	ENSGALP00000024710	Ribosomal protein L24	RPL24	6794300	0	0	0	0	0	0	0	0	0	0	0	0	0							0						675430	489080	620890	1801700	1908500	1298700	0.000475234	0.000314704	0.000309315	0.000347437	0.000382904	0.000252564	1000
1193	ENSGALP00000022414	SYNJ2BP	ENSGALP00000022414	1193	1193	45787	ENSGALP00000024722	Zona pellucida-like domain containing 1	ZPLD1	1703200	0	0	0	0	0	0	0	0	0	0	0	0	0							0						103440	59621	162490	446200	458220	473240	7.27806e-05	3.83638e-05	8.09494e-05	8.60445e-05	9.19331e-05	9.2033e-05	1000
172	ENSGALP00000002822	GLYR1	ENSGALP00000002822	172	172	65725	ENSGALP00000024723	Activated leukocyte cell adhesion molecule	ALCAM	299370	0	0	0	0	0	0	0	0	0	0	0	0	0							0						0	14224	12797	51084	167650	53617		9.1526e-06	6.37522e-06	9.85096e-06	3.36358e-05	1.04271e-05	1000
113	ENSGALP00000001688;ENSGALP00000024312	SH3GL1;SH3GL2	ENSGALP00000001688	113	113	119140	ENSGALP00000024724	Phosphatidylinositol glycan anchor biosynthesis, class G	PIGG	348510	0	0	0	0	0	0	0	0	0	0	0	0	0							0						0	18678	25472	119300	73919	111140		1.20186e-05	1.26897e-05	2.30056e-05	1.48304e-05	2.16139e-05	1000
981	ENSGALP00000017599	SPCS3	ENSGALP00000017599	981	981	33192	ENSGALP00000024734	CD47 molecule (CD47	CD47	2984800	0	0	0	0	0	0	0	0	0	0	0	0	0							0						294760	114720	214790	940310	593950	826270	0.000207394	7.38179e-05	0.000107004	0.000181328	0.000119165	0.000160688	1000
992	ENSGALP00000017880	ALG6	ENSGALP00000017880	992	992	62419	ENSGALP00000024751	Poliovirus receptor-related 3	PVRL3	178730	0	0	0	0	0	0	0	0	0	0	0	0	0							0						0	0	0	0	81569	97165					1.63653e-05	1.88961e-05	1000
1739	ENSGALP00000041993	RPL21	ENSGALP00000041993	1739	1739	8338.7	ENSGALP00000024757	ATP synthase, H+ transporting, mitochondrial Fo complex, subunit E	ATP5I	122110000	0	0	0	0	0	0	0	0	0	0	0	0	0							0						10126000	7154300	14669000	32381000	25405000	32375000	0.00712467	0.00460352	0.00730781	0.0062443	0.00509703	0.0062961	1000
238	ENSGALP00000003850	CCT6A	ENSGALP00000003850	238	238	33614	ENSGALP00000024821	Short chain dehydrogenase/reductase family 16C, member 5	SDR16C5	1064200	0	0	0	0	0	0	0	0	0	0	0	0	0							0						34840	28600	49075	221580	378850	351250	2.45135e-05	1.8403e-05	2.44482e-05	4.27292e-05	7.6009e-05	6.83091e-05	1000
958	ENSGALP00000017177;ENSGALP00000023703	RAB3B;RAB3C	ENSGALP00000017177;ENSGALP00000023703	958	958	38764	ENSGALP00000024827	Inositol monophosphatase domain containing 1	IMPAD1	1068900	0	0	0	0	0	0	0	0	0	0	0	0	0							0						50968	29528	68459	350320	237610	332040	3.58612e-05	1.90001e-05	3.41049e-05	6.75552e-05	4.76719e-05	6.45732e-05	1000
1245	ENSGALP00000023548	DAP3	ENSGALP00000023548	1245	1245	32057	ENSGALP00000024853	Syndecan binding protein (syntenin) (SDCBP	SDCBP	543520	0	0	0	0	0	0	0	0	0	0	0	0	0							0						0	0	0	194260	73052	276200				3.74608e-05	1.46565e-05	5.37138e-05	1000
270	ENSGALP00000004437	RPS10	ENSGALP00000004437	270	270	15121	ENSGALP00000024854	Mitochondrial pyruvate carrier 2	MPC2	3373600	0	0	0	0	0	0	0	0	0	0	0	0	0							0						137990	83747	255190	979340	955990	961340	9.709e-05	5.3888e-05	0.000127131	0.000188854	0.000191801	0.000186956	1000
672	ENSGALP00000011618	ERGIC2	ENSGALP00000011618	672	672	26922	ENSGALP00000024855	Myelin protein zero-like 1	MPZL1	736020	0	0	0	0	0	0	0	0	0	0	0	0	0							0						59614	33779	58338	134180	229430	220680	4.19445e-05	2.17355e-05	2.90629e-05	2.58751e-05	4.60307e-05	4.29166e-05	1000
122	ENSGALP00000001877	STX8	ENSGALP00000001877	122	122	72495	ENSGALP00000024856	Solute carrier family 44 (choline transporter), member 1	SLC44A1	516180	0	0	0	0	0	0	0	0	0	0	0	0	0							0						38575	0	43435	150470	164700	119000	2.71414e-05		2.16385e-05	2.90164e-05	3.30439e-05	2.31424e-05	1000
1517	ENSGALP00000034600	VAMP3	ENSGALP00000034600	516;1227;1517	1517	23521	ENSGALP00000024868	RAB2A, member RAS oncogene family	RAB2A	22020000	0	0	0	0	0	0	0	0	0	0	0	0	0							0						1251500	876890	1272800	6032000	5868800	6718300	0.000880557	0.000564245	0.000634084	0.0011632	0.00117746	0.00130654	1000
1121	ENSGALP00000020635	KIAA0319	ENSGALP00000020635	1121	1121	99790	ENSGALP00000024885	Prostaglandin F2 receptor inhibitor	PTGFRN	12687	0	0	0	0	0	0	0	0	0	0	0	0	0							0						0	0	0	0	0	12687						2.46729e-06	1000
1521	ENSGALP00000034616	MT-ATP8	ENSGALP00000034616	1521	1521	87623	ENSGALP00000024919	Aspartate beta-hydroxylase	ASPH	7433300	0	0	0	0	0	0	0	0	0	0	0	0	0							0						564990	288990	785150	1849100	2081500	1863700	0.000397528	0.000185954	0.000391146	0.000356578	0.000417613	0.000362441	1000
87	ENSGALP00000001051	SMPDL3B	ENSGALP00000001051	87	87	33399	ENSGALP00000024927	Coenzyme Q3 methyltransferase	COQ3	141910	0	0	0	0	0	0	0	0	0	0	0	0	0							0						0	0	0	0	0	141910						2.75978e-05	1000
1338	ENSGALP00000025461	CCT8	ENSGALP00000025461	1338	1338	52752	ENSGALP00000024938	G protein-coupled receptor 89A	GPR89A	492230	0	0	0	0	0	0	0	0	0	0	0	0	0							0						10373	0	15204	250750	215910	0	7.29846e-06		7.57434e-06	4.83543e-05	4.33182e-05		1000
932	ENSGALP00000016534	RAB21	ENSGALP00000016534	932	932	39715	ENSGALP00000024947	Cell adhesion molecule 2	CADM2	676030	0	0	0	0	0	0	0	0	0	0	0	0	0							0						0	0	0	291020	385010	0				5.61199e-05	7.72449e-05		1000
1309	ENSGALP00000024919	ASPH	ENSGALP00000024919	1309	1309	63372	ENSGALP00000024954	YTH domain family, member 3	YTHDF3	2756200	0	0	0	0	0	0	0	0	0	0	0	0	0							0						0	0	83132	0	0	2673100			4.14147e-05			0.000519849	1000
1095;1585	ENSGALP00000008435;ENSGALP00000020056;ENSGALP00000037718	SOX9;SOX10;SOX8	ENSGALP00000037718;ENSGALP00000020056;ENSGALP00000008435	1095;1585	1095;1585	55345	ENSGALP00000024965	Cytochrome P450, family 7, subfamily B, polypeptide 1	CYP7B1	45220	0	0	0	0	0	0	0	0	0	0	0	0	0							0						0	0	0	0	0	45220						8.79412e-06	1000
119	ENSGALP00000001848	PIGU	ENSGALP00000001848	119	119	93672	ENSGALP00000024991	Wolfram syndrome 1 (wolframin)	WFS1	302840	0	0	0	0	0	0	0	0	0	0	0	0	0							0						23331	0	0	73306	104360	101840	1.64157e-05			1.41362e-05	2.09378e-05	1.98052e-05	1000
1410	ENSGALP00000027189	KDELC1	ENSGALP00000027189	1410	1410	99319	ENSGALP00000025032	Sortilin-related VPS10 domain containing receptor 2	SORCS2	87478	0	0	0	0	0	0	0	0	0	0	0	0	0							0						0	0	0	0	18065	69413					3.6244e-06	1.3499e-05	1000
967	ENSGALP00000017282	GPX7	ENSGALP00000017282	967	967	37312	ENSGALP00000025070	HtrA serine peptidase 1	HTRA1	17426	17426	0	0	0	0	0	1	0	0	0	0	0	0							0						0	0	0	0	0	0							1000
1556	ENSGALP00000036432	SLC2A14	ENSGALP00000036432	1556	1556	89261	ENSGALP00000025077	UFM1-specific ligase 1	UFL1	201970	0	0	0	0	0	0	0	0	0	0	0	0	0							0						5218.1	0	0	62639	54367	79744	3.67146e-06			1.20792e-05	1.09077e-05	1.55081e-05	1000
253	ENSGALP00000004164	PLS1	ENSGALP00000004164	253	253	124400	ENSGALP00000025089	MutS homolog 3	MSH3	29323	0	0	0	0	29323	0	1	0	0	0	0	0	0							0						0	0	0	0	0	0							1000
734	ENSGALP00000012907	PLXDC2	ENSGALP00000012907	734	734	111370	ENSGALP00000025098_family	Family {EPH receptor A7}	EPHA7;EPHA10;EPHA2;EPHA4;EPHA5;EPHA6;EPHA8;EPHB1;EPHB2;EPHB6	223286	0	0	0	0	0	0	0	0	0	0	0	0	0							0						14820.2	6569.5	36152	53599	42646	69497	1.04275e-05	4.22722e-06	1.80102e-05	1.0336e-05	8.5561e-06	1.35154e-05	1000
1030	ENSGALP00000018679	RPL37A	ENSGALP00000018679	1030	1030	40783	ENSGALP00000025125	Low density lipoprotein receptor-related protein associated protein 1	LRPAP1	3764400	0	0	0	0	0	0	0	0	0	0	0	0	0							0						159660	228940	175190	1039800	1058100	1102700	0.000112337	0.000147314	8.72762e-05	0.000200513	0.000212288	0.000214447	1000
971	ENSGALP00000017367	MAGOH	ENSGALP00000017367	971	971	15807	ENSGALP00000025130	Ribosomal protein S23	RPS23	3477900	0	0	0	0	0	0	0	0	0	0	0	0	0							0						0	514880	0	1036100	908130	1018800		0.000331306		0.0001998	0.000182199	0.00019813	1000
280	ENSGALP00000004536	BNIP1	ENSGALP00000004536	280	280	43384	ENSGALP00000025152	Translocation associated membrane protein 1 (TRAM1	TRAM1	844590	0	0	0	0	0	0	0	0	0	0	0	0	0							0						0	0	0	311170	353120	180290				6.00056e-05	7.08468e-05	3.50617e-05	1000
1076	ENSGALP00000019469	RPSA	ENSGALP00000019469	1076	1076	28691	ENSGALP00000025165	Ribosomal protein L7	RPL7	18661000	235770	11681	0	0	0	0	2	195300	0	0	8079.1	0	33421	0.0026376			0.000341813		0.00122084	3	0.00140008	0.00115834	0.00047289			1107600	945520	1581500	5299600	3846000	5396300	0.000779309	0.000608406	0.000787872	0.00102197	0.000771626	0.00104944	1000
732	ENSGALP00000012877	PNPT1	ENSGALP00000012877	732	732	73987	ENSGALP00000025177	Staufen double-stranded RNA binding protein 2	STAU2	243060	0	0	0	0	0	0	0	0	0	0	0	0	0							0						9472.6	0	10824	90158	64344	68262	6.66494e-06		5.39231e-06	1.73859e-05	1.29094e-05	1.32752e-05	1000
722	ENSGALP00000039725;ENSGALP00000012709	NCAM1	ENSGALP00000012709;ENSGALP00000039725	722	722	12473	ENSGALP00000025184	Transcription elongation factor B (SIII), polypeptide 1 (15kDa, elongin C)	TCEB1	329200	0	0	0	0	0	0	0	0	0	0	0	0	0							0						0	0	0	169540	0	159660				3.26938e-05		3.10497e-05	1000
1152	ENSGALP00000021416	TMEM245	ENSGALP00000021416	1152	1152	33294	ENSGALP00000025198	Ganglioside induced differentiation associated protein 1	GDAP1	533770	0	0	0	0	0	0	0	0	0	0	0	0	0							0						0	0	0	89830	248870	195070				1.73227e-05	4.9931e-05	3.79361e-05	1000
698	ENSGALP00000012145	SSRP1	ENSGALP00000012145	698	698	44234	ENSGALP00000025208	Hydroxysteroid dehydrogenase like 2	HSDL2	280150	0	0	0	0	0	0	0	0	0	0	0	0	0							0						0	0	46796	77353	82702	73299			2.33129e-05	1.49166e-05	1.65926e-05	1.42548e-05	1000
235	ENSGALP00000003752	ITGB4	ENSGALP00000003752	235	235	81003	ENSGALP00000025213	Adducin 1 (alpha)	ADD1	267220	0	0	0	0	0	0	0	0	0	0	0	0	0							0						34843	13738	51981	38208	70762	57691	2.45156e-05	8.83988e-06	2.58959e-05	7.36797e-06	1.4197e-05	1.12194e-05	1000
407	ENSGALP00000006827	CPD	ENSGALP00000006827	407	407	7339.5	ENSGALP00000025250	Guanine nucleotide binding protein (G protein), gamma 10	GNG10	1201100	0	0	0	0	0	0	0	0	0	0	0	0	0							0						0	101370	0	186430	347950	565320		6.52277e-05		3.59509e-05	6.98095e-05	0.00010994	1000
764	ENSGALP00000013350	CASC4	ENSGALP00000013350	764	764	85848	ENSGALP00000025284	Leucine zipper-EF-hand containing transmembrane protein 1	LETM1	2945100	0	0	0	0	0	0	0	0	0	0	0	0	0							0						118990	126410	205870	885060	975620	633130	8.37216e-05	8.134e-05	0.00010256	0.000170674	0.000195739	0.000123127	1000
1057	ENSGALP00000019106	ACAD11	ENSGALP00000019106	1057	1057	40459	ENSGALP00000025340	Mitochondrial ribosomal protein L39	MRPL39	197280	0	0	0	0	0	0	0	0	0	0	0	0	0							0						12892	11893	13421	41684	45850	71539	9.07083e-06	7.65269e-06	6.68608e-06	8.03828e-06	9.19892e-06	1.39125e-05	1000
813	ENSGALP00000014298	RPL12	ENSGALP00000014298	813	813	12493	ENSGALP00000025356	ATP synthase, H+ transporting, mitochondrial Fo complex, subunit F6	ATP5J	17326000	0	0	0	0	0	0	0	0	0	0	0	0	0							0						578420	579310	471810	4507400	4499000	6689700	0.000406977	0.000372764	0.000235047	0.0008692	0.000902638	0.00130097	1000
825	ENSGALP00000040907;ENSGALP00000014585	FAM3C	ENSGALP00000014585;ENSGALP00000040907	825	825	14844	ENSGALP00000025382	Peripheral myelin protein 2	PMP2	4623400	0	0	0	0	0	0	0	0	0	0	0	0	0							0						195980	275120	258750	1231100	946560	1715900	0.000137892	0.000177029	0.000128904	0.000237403	0.000189909	0.000333698	1000
709	ENSGALP00000012405	PSMD1	ENSGALP00000012405	709	709	76488	ENSGALP00000025393	Pentatricopeptide repeat domain 3	PTCD3	186280	0	0	0	0	0	0	0	0	0	0	0	0	0							0						0	16131	20969	59145	0	90031		1.03797e-05	1.04463e-05	1.14054e-05		1.75087e-05	1000
1742	ENSGALP00000043088;ENSGALP00000042089	PSMD4	ENSGALP00000042089;ENSGALP00000043088	1742	1742	34743	ENSGALP00000025396	Ubiquitin-conjugating enzyme E2, J1 (UBE2J1	UBE2J1	303350	0	0	0	0	0	0	0	0	0	0	0	0	0							0						0	0	16905	68725	76805	140910			8.42174e-06	1.32528e-05	1.54095e-05	2.74034e-05	1000
1740	ENSGALP00000042023	NDUFS2	ENSGALP00000042023	1740	1740	79223	ENSGALP00000025404	Inner membrane protein, mitochondrial	IMMT	13542000	0	0	446500	0	766890	745200	3	0	0	0	0	0	0							0						825370	446380	1015700	3001800	3319800	2974300	0.000580732	0.000287229	0.000506002	0.000578863	0.000666054	0.000578425	1000
1417	ENSGALP00000027249	DNAJC3	ENSGALP00000027249	1417	1417	59586	ENSGALP00000025461	Chaperonin containing TCP1, subunit 8 (theta)	CCT8	450720	0	0	0	0	0	0	0	0	0	0	0	0	0							0						24009	0	20493	154750	174800	76669	1.68928e-05		1.02092e-05	2.98418e-05	3.50703e-05	1.49101e-05	1000
595	ENSGALP00000010409	SMPD4	ENSGALP00000010409	595	595	75370	ENSGALP00000025501	Synaptosomal-associated protein, 91 kDa homolog	SNAP91	35815	0	0	0	0	0	0	0	0	0	0	0	0	0							0						9623.3	0	7893.2	0	18299	0	6.77097e-06		3.93224e-06		3.67134e-06		1000
444;1320	ENSGALP00000002952;ENSGALP00000007541;ENSGALP00000007542;ENSGALP00000008426;ENSGALP00000010654;ENSGALP00000019068;ENSGALP00000023737;ENSGALP00000024824;ENSGALP00000025098;ENSGALP00000029850;ENSGALP00000037020	EPHA7;EPHA10;EPHA2;EPHA4;EPHA5;EPHA6;EPHA8;EPHB1;EPHB2;EPHB6	ENSGALP00000025098;ENSGALP00000007541;ENSGALP00000010654	444;1320	444;1320	41496	ENSGALP00000025531	Branched chain keto acid dehydrogenase E1, beta polypeptide	BCKDHB	69257	0	0	0	0	0	0	0	0	0	0	0	0	0							0						24107	0	0	0	45150	0	1.69617e-05				9.05848e-06		1000
829	ENSGALP00000014651	PIGK	ENSGALP00000014651	829	829	41449	ENSGALP00000025582	Transmembrane protein 30A	TMEM30A	2000000	0	0	0	0	0	0	0	0	0	0	0	0	0							0						85127	64606	54452	524820	552330	718620	5.98955e-05	4.15715e-05	2.71269e-05	0.000101205	0.000110814	0.000139753	1000
1344	ENSGALP00000025597	CD109	ENSGALP00000025597	1344	1344	161690	ENSGALP00000025597	CD109 molecule	CD109	25674	0	0	0	0	0	0	0	0	0	0	0	0	0							0						0	0	0	0	11591	14083					2.32551e-06	2.73878e-06	1000
438;1136	ENSGALP00000007490;ENSGALP00000021028	MSN;RDX	ENSGALP00000007490;ENSGALP00000021028	438;1136	438;1136	35746	ENSGALP00000025600	2,4-dienoyl CoA reductase 1, mitochondrial	DECR1	1309200	0	0	0	0	0	0	0	0	0	0	0	0	0							0						91946	111660	0	447050	503430	155090	6.46934e-05	7.1849e-05		8.62084e-05	0.000101004	3.0161e-05	1000
31;798;1133;1195;1754;1779	ENSGALP00000000073;ENSGALP00000013964;ENSGALP00000020884;ENSGALP00000022436;ENSGALP00000042274;ENSGALP00000042665	TUBB4B;TUBB2A;TUBB3;TUBB5;TUBB6;TUBB8	ENSGALP00000013964;ENSGALP00000020884;ENSGALP00000022436;ENSGALP00000000073;ENSGALP00000042274;ENSGALP00000042665	31;798;1133;1195;1754;1779	31;798;1133;1195;1754;1779	50156	ENSGALP00000025606_family	Family {Eukaryotic translation elongation factor 1 alpha 1}	EEF1A1;EEF1A2	12105420	258920	0	0	0	0	0	1	15389	103860	195020	64921	85449	25934	0.000207834	0.00384106	0.0019759	0.0027467	0.00197075	0.000947348	6	0.00194827	0.00128471	0.00052448			1097300	887870	1865800	2450798	2546710	2507206	0.000772062	0.000571311	0.000929505	0.000472608	0.000510949	0.000487587	1000
1568	ENSGALP00000036957	FMNL2	ENSGALP00000036957	1568	1568	102500	ENSGALP00000025642	Transmembrane protein 67	TMEM67	96094	0	0	0	0	0	0	0	0	0	0	0	0	0							0						0	0	0	33015	33201	29878				6.36656e-06	6.66115e-06	5.8105e-06	1000
142	ENSGALP00000002248	TOP3B	ENSGALP00000002248	142	142	202920	ENSGALP00000025680	KIAA1429	KIAA1429	12681	0	0	0	0	0	0	0	0	0	0	0	0	0							0						0	0	0	8747.5	3933.3	0				1.68685e-06	7.89141e-07		1000
1395	ENSGALP00000026672	EPT1	ENSGALP00000026672	1395	1395	61651	ENSGALP00000025681	Catenin (cadherin-associated protein), alpha 2	CTNNA2	2400000	0	0	0	0	0	0	0	0	0	0	0	0	0							0						58288	58845	48115	748620	758970	727180	4.10115e-05	3.78645e-05	2.397e-05	0.000144363	0.000152273	0.000141418	1000
335;651	ENSGALP00000005655;ENSGALP00000011384	INSR;IGF1R	ENSGALP00000005655;ENSGALP00000011384	335;651	335;651	90521	ENSGALP00000025727	Protein tyrosine phosphatase, receptor type, A	PTPRA	37133	0	0	0	0	0	0	0	0	0	0	0	0	0							0						0	6233.3	0	0	30900	0		4.01089e-06			6.19949e-06		1000
1624	ENSGALP00000038965;ENSGALP00000025899	DYSF;MYOF	ENSGALP00000038965	1624	1624	35669	ENSGALP00000025738	DDRGK domain containing 1	DDRGK1	685130	0	0	0	0	0	0	0	0	0	0	0	0	0							0						0	0	0	119610	263480	302030				2.30654e-05	5.28622e-05	5.8737e-05	1000
565	ENSGALP00000009821	RPS13	ENSGALP00000009821	565	565	24517	ENSGALP00000025745	Mitochondrial ATP synthase, O subunit	ATP5O	70958000	0	0	0	0	0	0	0	0	0	0	0	0	0							0						5320700	4444400	8137000	16835000	18121000	18100000	0.00374365	0.0028598	0.00405369	0.00324644	0.00363563	0.00351998	1000
1446	ENSGALP00000028214	ANKRD46	ENSGALP00000028214	1446	1446	52148	ENSGALP00000025883	Eukaryotic translation initiation factor 3, subunit E	EIF3E	895820	0	0	0	0	0	0	0	0	0	0	0	0	0							0						52218	41035	25343	247410	178190	351620	3.67407e-05	2.64045e-05	1.26254e-05	4.77102e-05	3.57504e-05	6.8381e-05	1000
118	ENSGALP00000001845	PCCB	ENSGALP00000001845	118	118	40234	ENSGALP00000025887	Sideroflexin 5	SFXN5	83884	0	0	0	0	0	0	0	0	0	0	0	0	0							0						0	0	0	49657	34228	0				9.57578e-06	6.86719e-06		1000
1518	ENSGALP00000034612	MT-ND1	ENSGALP00000034612	1518	1518	34884	ENSGALP00000025890	ER membrane protein complex subunit 2	EMC2	7410200	0	0	0	0	0	0	0	0	0	0	0	0	0							0						456510	589040	333820	2042500	2036100	1952200	0.000321201	0.000379025	0.000166303	0.000393873	0.000408504	0.000379652	1000
251	ENSGALP00000004048	KTN1	ENSGALP00000004048	251	251	72050	ENSGALP00000025921	RAD21 homolog	RAD21	267810	0	0	0	0	0	0	0	0	0	0	0	0	0							0						0	0	0	110950	46579	110280				2.13954e-05	9.34518e-06	2.14466e-05	1000
153	ENSGALP00000002407	MRPL40	ENSGALP00000002407	153	153	39536	ENSGALP00000025924	Eukaryotic translation initiation factor 3, subunit H	EIF3H	547820	0	0	0	0	0	0	0	0	0	0	0	0	0							0						0	0	0	178100	142780	226940				3.43445e-05	2.86461e-05	4.4134e-05	1000
1477	ENSGALP00000031379	SUCLG1	ENSGALP00000031379	1477	1477	34421	ENSGALP00000025929	Hydroxyacyl-CoA dehydrogenase	HADH	790430	0	0	0	0	0	0	0	0	0	0	0	0	0							0						38103	30049	33956	279040	150680	258600	2.68093e-05	1.93354e-05	1.69162e-05	5.38097e-05	3.02311e-05	5.0291e-05	1000
1204	ENSGALP00000022646	EPB41L2	ENSGALP00000022646	1204	1204	13282	ENSGALP00000025979	Prostate stem cell antigen	PSCA	417830	0	0	0	0	0	0	0	0	0	0	0	0	0							0						129760	0	83966	204100	0	0	9.12993e-05		4.18302e-05	3.93583e-05			1000
1593	ENSGALP00000038042	CNTN1	ENSGALP00000038042	1593	1593	31838	ENSGALP00000025993	T-SNARE domain containing 1	TSNARE1	284880	0	0	0	0	0	0	0	0	0	0	0	0	0							0						0	0	0	128200	156680	0				2.47219e-05	3.14348e-05		1000
1831	REV__ENSGALP00000009341	REV__ENSGALP00000009341	REV__ENSGALP00000009341	1831	1831	11477	ENSGALP00000026015	Ribosomal protein, large, P1	RPLP1	30441000	0	0	0	0	0	0	0	0	0	0	0	0	0							0						1811800	0	2487000	7857800	8231000	10053000	0.00127479		0.00123897	0.00151529	0.00165139	0.00195505	1000
468	ENSGALP00000007948	SLC27A4	ENSGALP00000007948	468	468	43582	ENSGALP00000026077	1-acylglycerol-3-phosphate O-acyltransferase 3	AGPAT3	3909100	0	0	0	0	0	0	0	0	0	0	0	0	0							0						117920	236260	170900	1179300	1477300	727460	8.29687e-05	0.000152024	8.5139e-05	0.000227414	0.000296392	0.000141472	1000
742	ENSGALP00000012985	BCAP29	ENSGALP00000012985	742	742	44218	ENSGALP00000026092	N-myc downstream regulated 1	NDRG1	2976200	0	0	0	0	0	0	0	0	0	0	0	0	0							0						68216	77626	251050	963500	742450	873390	4.79969e-05	4.99494e-05	0.000125068	0.0001858	0.000148958	0.000169852	1000
193	ENSGALP00000003113	BCAS2	ENSGALP00000003113	193	193	48207	ENSGALP00000026110	Monoamine oxidase A	MAOA	121940	0	0	0	0	0	0	0	0	0	0	0	0	0							0						0	0	0	0	87860	34084					1.76274e-05	6.62846e-06	1000
80	ENSGALP00000000948	TMCC2	ENSGALP00000000948	80	80	105360	ENSGALP00000026115	Calcium/calmodulin-dependent serine protein kinase (MAGUK family)	CASK	131720	0	0	0	0	0	0	0	0	0	0	0	0	0							0						7977.9	10424	0	30120	54793	28409	5.61326e-06	6.70745e-06		5.8083e-06	1.09932e-05	5.52482e-06	1000
1623	ENSGALP00000038957	RPL27	ENSGALP00000038957	1623	1623	72643	ENSGALP00000026123	DEAD (Asp-Glu-Ala-Asp) box helicase 3, X-linked	DDX3X	657040	0	0	0	0	0	0	0	0	30877	7562.7	0	0	0		0.00114193	7.66237e-05				2	0.000609275	0.000753283	0.000307526	0.00495357	0.00438111	43476	72066	88899	200570	76659	136930	3.05898e-05	4.63717e-05	4.42877e-05	3.86776e-05	1.53802e-05	2.66293e-05	1000	0.00495357
741	ENSGALP00000012982	ITGA11	ENSGALP00000012982	741	741	290160	ENSGALP00000026130	Ubiquitin specific peptidase 9, X-linked	USP9X	7078.3	0	0	0	0	0	0	0	0	0	0	0	0	0							0						0	3199.5	0	0	0	3878.8		2.05876e-06				7.54326e-07	1000
1428	ENSGALP00000027618	SAP18	ENSGALP00000027618	1428	1428	37273	ENSGALP00000026139	ATPase, H+ transporting, lysosomal accessory protein 2 (ATP6AP2	ATP6AP2	423690	0	0	0	0	0	0	0	0	0	0	0	0	0							0						0	0	0	208730	214950	0				4.02512e-05	4.31256e-05		1000
408	ENSGALP00000006885;ENSGALP00000039915	P4HA1	ENSGALP00000006885;ENSGALP00000039915	408	408	57798	ENSGALP00000026164	Otoconin 90	OC90	5199700	0	0	0	0	0	0	0	0	0	0	0	0	0							0						552940	532350	624480	975110	1170000	1344800	0.000389049	0.000342547	0.000311104	0.000188039	0.000234738	0.000261529	1000
692	ENSGALP00000012086	GOT1	ENSGALP00000012086	692	692	356290	ENSGALP00000026200	Dystrophin	DMD	215000	0	0	0	0	0	0	0	0	0	0	0	0	0							0						1950.2	8343.9	10103	68009	68267	58324	1.37216e-06	5.36898e-06	5.03312e-06	1.31148e-05	1.36965e-05	1.13425e-05	1000
1296	ENSGALP00000024723	ALCAM	ENSGALP00000024723	1296	1296	53115	ENSGALP00000026254	Leucine rich repeat containing 1	LRRC1	316530	0	0	0	0	0	0	0	0	0	0	0	0	0							0						22732	0	0	73041	61339	159420	1.59943e-05			1.40851e-05	1.23065e-05	3.10031e-05	1000
513	ENSGALP00000008794	CDH13	ENSGALP00000008794	513	513	26340	ENSGALP00000026283	Glutathione S-transferase, alpha 4	GSTA4	49594	0	0	0	0	0	0	0	0	0	0	0	0	0							0						0	0	0	49594	0	0				9.56363e-06			1000
332	ENSGALP00000005628	PEX11G	ENSGALP00000005628	332	332	42376	ENSGALP00000026290	1-acylglycerol-3-phosphate O-acyltransferase 5	AGPAT5	464680	0	0	0	0	0	0	0	0	0	0	0	0	0							0						42440	34345	0	141090	69758	177040	2.98609e-05	2.20997e-05		2.72076e-05	1.39956e-05	3.44297e-05	1000
1059;1061;1573	ENSGALP00000019163;ENSGALP00000019205;ENSGALP00000037266	HIST1H1B	ENSGALP00000019163;ENSGALP00000037266;ENSGALP00000019205	1059;1061;1573	1059;1061;1573	75764	ENSGALP00000026298	Metastasis suppressor 1	MTSS1	3127.1	0	0	0	0	0	0	0	0	0	0	0	0	3127.1						0.00011423	1	0.00011423			0.000928723	#VALUE!	0	0	0	0	0	0							1000	0.000928723
90	ENSGALP00000001233	NDUFA2	ENSGALP00000001233	90	90	21883	ENSGALP00000026301	NADH dehydrogenase (ubiquinone) 1 beta subcomplex, 9, 22kDa	NDUFB9	13052000	0	0	0	0	0	0	0	0	0	0	0	0	0							0						587360	597180	675760	3762800	3634200	3794300	0.000413267	0.000384263	0.00033665	0.000725613	0.000729133	0.000737893	1000
434	ENSGALP00000007287	RPS14	ENSGALP00000007287	434	434	24156	ENSGALP00000026316	Apolipoprotein O	APOO	13820000	0	0	0	0	0	0	0	0	0	0	0	0	0							0						1130500	790180	1461800	3212500	3778200	3446900	0.000795422	0.000508451	0.00072824	0.000619494	0.000758024	0.000670333	1000
1534	ENSGALP00000035478	FLNB	ENSGALP00000035478	1534	1534	211030	ENSGALP00000026322	Fer-1-like 6	FER1L6	10283000	0	0	0	0	0	0	0	2403400	0	0	0	7873600	5533.7	0.0324588				0.181593	0.000202142	3	0.0714178	0.0967677	0.0395052	0.580646	0.458644	0	0	0	0	0	0							1000	0.580646
248	ENSGALP00000004011	COL5A1	ENSGALP00000004011	248	248	48525	ENSGALP00000026327	Acyl-CoA thioesterase 9	ACOT9	26882	0	0	0	10806	0	0	1	0	0	0	0	0	0							0						0	0	0	0	0	16077						3.12656e-06	1000
105	ENSGALP00000001474	HSPA5	ENSGALP00000001474	105;608;1058	105	32156	ENSGALP00000026337	Peroxiredoxin 4	PRDX4	6973200	0	0	0	0	0	0	0	0	0	13125	0	0	0			0.00013298				1	0.00013298			0.00108116	#VALUE!	425280	783960	362350	1762900	1763500	1862100	0.000299228	0.000504448	0.000180516	0.000339955	0.000353813	0.00036213	1000	0.00108116
120	ENSGALP00000001850	HERPUD1	ENSGALP00000001850	120	120	160930	ENSGALP00000026363	Peroxidasin homolog	PXDN	14030	0	0	0	0	0	0	0	0	0	0	0	0	0							0						0	0	0	9535.8	0	4494.4				1.83887e-06		8.74045e-07	1000
1321	ENSGALP00000025125	LRPAP1	ENSGALP00000025125	1321	1321	28909	ENSGALP00000026381	Derlin 1	DERL1	2760800	0	0	0	0	0	0	0	0	0	0	0	0	0							0						148600	0	0	782260	847750	982180	0.000104555			0.00015085	0.000170085	0.000191009	1000
1228	ENSGALP00000023266	RPS20	ENSGALP00000023266	1228	1228	22311	ENSGALP00000026392	Ribosomal protein S7	RPS7	9027100	0	0	0	0	0	0	0	0	0	0	0	0	0							0						320040	106670	1070500	1709300	3141200	2679300	0.000225181	6.86381e-05	0.000533302	0.000329619	0.000630222	0.000521055	1000
30	ENSGALP00000000069	LAMTOR3	ENSGALP00000000069	30	30	30167	ENSGALP00000026395	Calbindin 1, 28kDa	CALB1	1221000	0	0	0	0	0	0	0	0	0	0	0	0	0							0						0	0	52136	556760	71363	540730			2.59731e-05	0.000107365	1.43176e-05	0.000105158	1000
557	ENSGALP00000009708	HDGFRP3	ENSGALP00000009708	557	557	56758	ENSGALP00000026399	Syntrophin, beta 1 (dystrophin-associated protein A1, 59kDa, basic component 1)	SNTB1	1287100	0	0	0	0	0	0	0	0	0	0	0	0	0							0						51559	151440	134110	284020	314100	351860	3.6277e-05	9.74459e-05	6.6811e-05	5.477e-05	6.30182e-05	6.84277e-05	1000
306	ENSGALP00000040737;ENSGALP00000005167	HSDL1	ENSGALP00000005167;ENSGALP00000040737	306	306	199360	ENSGALP00000026419	Collagen, type XIV, alpha 1	COL14A1	415500	0	0	0	0	0	0	0	0	0	0	0	0	0							0						38381	21211	37921	87773	88235	141980	2.70049e-05	1.36485e-05	1.88915e-05	1.6926e-05	1.77027e-05	2.76114e-05	1000
973	ENSGALP00000017456	YIPF1	ENSGALP00000017456	973	973	59552	ENSGALP00000026423	Membrane bound O-acyltransferase domain containing 2	MBOAT2	200270	0	0	0	0	0	0	0	0	0	0	0	0	0							0						0	17167	0	101620	40029	41449		1.10463e-05		1.95962e-05	8.03105e-06	8.06076e-06	1000
1278	ENSGALP00000024331	TJP2	ENSGALP00000024331	1278	1278	44442	ENSGALP00000026457	Pyruvate dehydrogenase (lipoamide) alpha 1	PDHA1	818400	0	0	0	0	0	0	0	0	0	0	0	0	0							0						44863	7091.7	54373	200900	224080	287090	3.15657e-05	4.56324e-06	2.70876e-05	3.87413e-05	4.49574e-05	5.58316e-05	1000
107	ENSGALP00000001480	EPX	ENSGALP00000001480	107	107	48787	ENSGALP00000026487	Protein disulfide isomerase family A, member 6	PDIA6	42051000	0	0	0	0	0	0	0	0	6129.7	0	0	0	0		0.000226695					1	0.000226695			0.00184309	#VALUE!	4104600	2883300	5511200	9557200	9899500	10089000	0.002888	0.00185529	0.00274557	0.001843	0.00198615	0.00196205	1000	0.00184309
1229	ENSGALP00000023267	RETSAT	ENSGALP00000023267	1229	1229	81890	ENSGALP00000026509	DEAD (Asp-Glu-Ala-Asp) box helicase 1	DDX1	140940	0	0	0	0	0	0	0	0	0	0	0	0	0							0						17379	15255	0	21335	8704.3	78267	1.22279e-05	9.81601e-06		4.11421e-06	1.74635e-06	1.52209e-05	1000
1683	ENSGALP00000040975	TOR1AIP1	ENSGALP00000040975	1683	1683	14585	ENSGALP00000026567	Pre-mRNA branch site protein p14	SF3B14	1405400	0	0	0	0	0	0	0	0	0	0	0	0	0							0						0	0	0	461670	481080	462690				8.90277e-05	9.65195e-05	8.99813e-05	1000
823	ENSGALP00000014529	NEXN	ENSGALP00000014529	823	823	85725	ENSGALP00000026633	Hydroxyacyl-CoA dehydrogenase/3-ketoacyl-CoA thiolase/enoyl-CoA hydratase (trifunctional protein), alpha subunit	HADHA	34099000	0	0	0	0	0	0	0	13104	0	0	0	4592.5	0	0.000176974				0.000105919		2	0.000141447	5.02436e-05	2.05118e-05	0.00115	0.00032734	2066800	1478700	2839300	8876100	9704400	9116000	0.0014542	0.000951487	0.00141448	0.00171165	0.001947	0.00177283	1000	0.00115
548	ENSGALP00000009528	RUVBL1	ENSGALP00000009528	548	548	46120	ENSGALP00000026672	Ethanolaminephosphotransferase 1 (CDP-ethanolamine-specific)	EPT1	2108500	0	0	0	0	0	0	0	0	0	0	0	0	0							0						81118	69127	143390	625940	496220	692720	5.70748e-05	4.44806e-05	7.14341e-05	0.000120705	9.9557e-05	0.000134716	1000
1607	ENSGALP00000038462	BPIFB7	ENSGALP00000038462	1607	1607	63249	ENSGALP00000026689	Epoxide hydrolase 2, cytoplasmic	EPHX2	83484	0	0	0	53442	0	0	1	0	0	0	0	0	0							0						7703.9	0	9326.4	0	0	13012	5.42048e-06		4.64623e-06			2.5305e-06	1000
1406	ENSGALP00000041328;ENSGALP00000027112	TMCO3	ENSGALP00000027112;ENSGALP00000041328	1406	1406	92297	ENSGALP00000026748	EFR3 homolog A	EFR3A	41331	0	0	0	0	0	0	0	0	0	0	0	0	0							0						0	2859.4	6395.2	0	16708	15368		1.83991e-06	3.18596e-06		3.35214e-06	2.98868e-06	1000
1801	ENSGALP00000043053	GNG2	ENSGALP00000043053	1801	1801	66730	ENSGALP00000026809	Arylsulfatase E (chondrodysplasia punctata 1)	ARSE	1391800	0	0	0	0	0	0	0	0	0	0	0	0	0							0						18018	15663	106000	425110	409990	416980	1.26775e-05	1.00785e-05	5.28071e-05	8.19776e-05	8.22566e-05	8.10918e-05	1000
1487	ENSGALP00000032471	PLA2R1	ENSGALP00000032471	1487	1487	66495	ENSGALP00000026829	Arylsulfatase E (chondrodysplasia punctata 1)	ARSE	40038	0	0	0	0	0	0	0	0	0	0	0	0	0							0						0	0	0	20391	0	19647				3.93217e-06		3.82083e-06	1000
1098	ENSGALP00000020093;ENSGALP00000041765	GCAT	ENSGALP00000020093	1098	1098	39722	ENSGALP00000026942	Retinitis pigmentosa 2 (X-linked recessive)	RP2	130710	0	0	0	0	0	0	0	0	0	0	0	0	0							0						14038	0	0	0	0	116670	9.87716e-06					2.26893e-05	1000
162	ENSGALP00000002520	SEPT1_	ENSGALP00000002520	162	162	145540	ENSGALP00000026957	Cytoplasmic FMR1 interacting protein 1	CYFIP1	128230	0	0	0	0	0	0	0	0	0	0	0	0	0							0						46790	0	7236.6	31904	30913	11390	3.29215e-05		3.60513e-06	6.15232e-06	6.2021e-06	2.21506e-06	1000
659	ENSGALP00000011509	TNC	ENSGALP00000011509	659	659	136480	ENSGALP00000027015	Eukaryotic translation initiation factor 5B	EIF5B	51796	0	0	0	0	0	0	0	0	0	0	0	0	0							0						0	0	0	21765	0	30031				4.19713e-06		5.84025e-06	1000
1823	NP_001159798.1;ENSGALP00000041690	PPIA	ENSGALP00000041690;NP_001159798.1	1823	1823	14692	ENSGALP00000027030	Ribosomal protein L31	RPL31	6851300	0	0	0	0	0	0	0	0	0	125040	0	0	0			0.00126688				1	0.00126688			0.0103001	#VALUE!	219180	908270	163370	1315300	1656100	2464100	0.000154215	0.000584437	8.13878e-05	0.00025364	0.000332265	0.000479204	1000	0.0103001
1423	ENSGALP00000027424	SPRYD7	ENSGALP00000027424	1423	1423	42924	ENSGALP00000027063	Mitochondrial ribosomal protein S9	MRPS9	391330	0	0	0	0	0	0	0	0	0	0	0	0	0							0						14829	0	12327	64718	128830	170630	1.04337e-05		6.14107e-06	1.24801e-05	2.58473e-05	3.31831e-05	1000
853	ENSGALP00000015099	EPHX1	ENSGALP00000015099	853	853	47638	ENSGALP00000027072	UDP-glucuronate decarboxylase 1	UXS1	897070	0	0	0	0	0	0	0	0	0	0	0	0	0							0						0	0	101560	312780	168000	314740			5.05952e-05	6.0316e-05	3.3706e-05	6.12088e-05	1000
66	ENSGALP00000000669	NACA	ENSGALP00000000669	66	66	44680	ENSGALP00000027119	Lysosomal-associated membrane protein 1	LAMP1	2491600	0	0	0	0	0	0	0	0	0	0	0	0	0							0						189980	925980	164240	439770	506080	265550	0.00013367	0.000595833	8.18212e-05	8.48046e-05	0.000101535	5.16426e-05	1000
1710	ENSGALP00000041478	EMILIN3	ENSGALP00000041478	1710	1710	160740	ENSGALP00000027146	Collagen, type IV, alpha 1	COL4A1	60229	0	0	0	0	0	0	0	0	0	0	0	0	0							0						7796.8	9864.7	11852	13071	17645	0	5.48584e-06	6.34756e-06	5.90444e-06	2.52059e-06	3.54013e-06		1000
35	ENSGALP00000000135	ANTXR1	ENSGALP00000000135	35	35	32237	ENSGALP00000027161	Carbohydrate kinase domain containing	CARKD	81936	0	0	0	0	0	0	0	0	0	0	0	0	0							0						0	0	0	0	81936	0					1.64389e-05		1000
147	ENSGALP00000002338	SF3A3	ENSGALP00000002338	147	147	51497	ENSGALP00000027189	KDEL (Lys-Asp-Glu-Leu) containing 1	KDELC1	105020	0	0	0	0	0	0	0	0	0	0	0	0	0							0						22489	0	0	0	0	82536	1.58233e-05					1.60511e-05	1000
1631	ENSGALP00000039141	GDE1	ENSGALP00000039141	1631	1631	83554	ENSGALP00000027206	Transmembrane and tetratricopeptide repeat containing 4	TMTC4	362220	0	0	0	0	0	0	0	0	0	0	0	0	0							0						0	0	12321	76009	168580	105310			6.13808e-06	1.46575e-05	3.38223e-05	2.04801e-05	1000
719	ENSGALP00000012652	HID1	ENSGALP00000012652	719	719	78554	ENSGALP00000027209	Propionyl CoA carboxylase, alpha polypeptide	PCCA	98213	0	0	0	0	0	0	0	0	0	0	0	0	0							0						19269	9565.6	29092	16469	23816	0	1.35577e-05	6.1551e-06	1.44931e-05	3.17586e-06	4.77822e-06		1000
403	ENSGALP00000006708;ENSGALP00000006706	HK1;HKDC1	ENSGALP00000006708	403;896	403	75310	ENSGALP00000027216	Transmembrane 9 superfamily member 2	TM9SF2	9603700	0	0	0	0	0	0	0	0	0	0	0	0	0							0						178350	156420	502700	2621700	3117400	3027100	0.000125487	0.00010065	0.000250435	0.000505565	0.000625447	0.000588693	1000
328	ENSGALP00000005548	TCIRG1	ENSGALP00000005548	328	328	20654	ENSGALP00000027241	RAP2A, member of RAS oncogene family	RAP2A	198140	0	0	0	0	0	0	0	0	0	0	0	0	0							0						0	33510	0	70934	93692	0		2.15624e-05		1.36788e-05	1.87975e-05		1000
1402	ENSGALP00000027015	EIF5B	ENSGALP00000027015	1402	1402	178990	ENSGALP00000027247	UDP-glucose glycoprotein glucosyltransferase 2	UGGT2	72021	0	0	0	0	0	0	0	0	0	0	0	0	0							0						0	0	0	13096	24179	34746				2.52541e-06	4.85105e-06	6.7572e-06	1000
1434	ENSGALP00000027805	FOLH1	ENSGALP00000027805	1434	1434	57397	ENSGALP00000027249	DnaJ (Hsp40) homolog, subfamily C, member 3	DNAJC3	355780	0	0	0	0	0	0	0	0	0	0	0	0	0							0						17502	91269	26850	36206	0	183960	1.23144e-05	5.87281e-05	1.33761e-05	6.98191e-06		3.57755e-05	1000
40	ENSGALP00000000220	CDS2	ENSGALP00000000220	40	40	38680	ENSGALP00000027337	Leukocyte cell derived chemotaxin 1	LECT1	164050	0	0	0	0	0	0	0	0	0	0	0	0	0							0						29492	0	36278	57657	0	40619	2.07506e-05		1.8073e-05	1.11185e-05		7.89935e-06	1000
775	ENSGALP00000013544	F2	ENSGALP00000013544	775	775	49997	ENSGALP00000027401	Succinate-CoA ligase, ADP-forming, beta subunit	SUCLA2	82660	0	0	0	0	0	0	0	0	0	0	0	0	0							0						0	0	22540	0	0	60120			1.1229e-05			1.16918e-05	1000
814	ENSGALP00000014306	SLC1A4	ENSGALP00000014306	814	814	131600	ENSGALP00000027412	Fibronectin type III domain containing 3A	FNDC3A	139780	0	0	0	0	0	0	0	0	0	0	0	0	0							0						12207	0	0	45827	43566	38185	8.58887e-06			8.83721e-06	8.74068e-06	7.426e-06	1000
846	ENSGALP00000015016	AGPS	ENSGALP00000015016	846	846	21735	ENSGALP00000027424	SPRY domain containing 7	SPRYD7	285700	0	0	0	0	0	0	0	0	0	0	0	0	0							0						0	0	0	69657	69689	146350				1.34326e-05	1.39818e-05	2.84613e-05	1000
819	ENSGALP00000014374	MDH1	ENSGALP00000014374	819	819	32781	ENSGALP00000027467	Solute carrier family 25 (mitochondrial carrier; ornithine transporter) member 15 (SLC25A15), nuclear gene encoding mitochondrial protein, mRNA.	SLC25A15	2841300	0	0	0	0	0	0	0	0	0	0	0	0	0							0						0	0	40246	791750	1000500	1008800			2.00498e-05	0.00015268	0.000200731	0.000196186	1000
731	ENSGALP00000012869	DLD	ENSGALP00000012869	731	731	37259	ENSGALP00000027494	ALG5, dolichyl-phosphate beta-glucosyltransferase	ALG5	1179700	0	0	0	0	0	0	0	0	0	0	0	0	0							0						15818	88835	0	126990	213160	734860	1.11296e-05	5.71619e-05		2.44886e-05	4.27665e-05	0.000142911	1000
144	ENSGALP00000002297	CNTRL	ENSGALP00000002297	144	144	164750	ENSGALP00000027519	PDS5, regulator of cohesion maintenance, homolog B	PDS5B	24800	0	0	0	0	0	0	0	0	0	0	0	0	0							0						0	0	0	24800	0	0				4.78239e-06			1000
1748	ENSGALP00000042172	COX7A2L	ENSGALP00000042172	1748	1748	24909	ENSGALP00000027541	High mobility group box 1	HMGB1	16020000	0	0	0	0	0	0	0	0	0	0	0	0	0							0						908070	531140	1291300	4116200	4814100	4359400	0.00063892	0.000341768	0.0006433	0.000793762	0.000965857	0.000847791	1000
1078	ENSGALP00000019563	XPNPEP3	ENSGALP00000019563	1078	1078	17605	ENSGALP00000027618	Sin3A-associated protein, 18kDa	SAP18	808350	0	0	0	0	0	0	0	0	0	0	0	0	0							0						51178	0	86455	192860	286450	191410	3.60089e-05		4.30702e-05	3.71908e-05	5.74707e-05	3.72243e-05	1000
1667	ENSGALP00000040606	CD99	ENSGALP00000040606	1667	1667	30923	ENSGALP00000027628	Gap junction protein, beta 2, 26kDa	GJB2	3892900	0	0	0	0	0	0	0	0	0	0	0	0	0							0						67866	0	124190	1345900	1467700	887250	4.77506e-05		6.1869e-05	0.000259541	0.000294466	0.000172547	1000
319	ENSGALP00000005448	MGST3	ENSGALP00000005448	319	319	44090	ENSGALP00000027665	Acetyl-CoA acetyltransferase 1	ACAT1	3895500	0	0	0	0	0	0	0	0	0	0	0	0	0							0						401780	303660	390360	816700	1019100	963950	0.000282693	0.000195394	0.00019447	0.000157491	0.000204463	0.000187463	1000
1124	ENSGALP00000020744	HSP90B1	ENSGALP00000020744	931;1124	1124	40993	ENSGALP00000027692	Myb/SANT-like DNA-binding domain containing 4 with coiled-coils	MSANTD4	180730	0	0	0	0	0	0	0	0	0	123760	12805	0	44165			0.00125391	0.000541758		0.00161331	3	0.00113633	0.000545368	0.000222645	0.00923863	0.00275207	0	0	0	0	0	0							1000	0.00923863
610	ENSGALP00000010560	CD81	ENSGALP00000010560	610	610	98589	ENSGALP00000027741	Rho GTPase activating protein 42	ARHGAP42	522370	0	0	0	0	0	0	0	0	0	0	0	0	0							0						110860	0	0	0	411500	0	7.80013e-05				8.25596e-05		1000
1154	ENSGALP00000021459	CHMP5	ENSGALP00000021459	1154	1154	52541	ENSGALP00000027758	Endonuclease domain containing 1	ENDOD1	1009600	0	0	0	0	0	0	0	0	0	0	0	0	0							0						0	15517	34034	304810	279810	375480		9.9846e-06	1.69551e-05	5.87791e-05	5.61385e-05	7.30212e-05	1000
285	ENSGALP00000004596;ENSGALP00000006925	NEDD4;NEDD4L	ENSGALP00000004596	285	285	84017	ENSGALP00000027805	Folate hydrolase (prostate-specific membrane antigen) 1	FOLH1	429040	0	0	0	0	0	0	0	0	0	0	0	0	0							0						0	0	0	116400	154850	157790				2.24464e-05	3.10677e-05	3.06861e-05	1000
331	ENSGALP00000005587	SLC12A4	ENSGALP00000005587	331;645;1110	331	29583	ENSGALP00000027835	Coiled-coil domain containing 90B	CCDC90B	183000	0	0	0	0	0	0	0	0	0	0	0	0	0							0						0	0	10518	18163	95890	58425			5.23986e-06	3.50253e-06	1.92385e-05	1.13622e-05	1000
1324	ENSGALP00000025165	RPL7	ENSGALP00000025165	1324	1324	43079	ENSGALP00000027884	NADH dehydrogenase (ubiquinone) 1 alpha subcomplex, 9, 39kDa	NDUFA9	12725000	0	0	0	0	0	0	0	0	0	12006	0	0	0			0.000121642				1	0.000121642			0.000988984	#VALUE!	733280	335330	1026800	3890200	3350100	3377500	0.000515937	0.000215772	0.000511532	0.00075018	0.000672133	0.000656836	1000	0.000988984
1717	ENSGALP00000041639	RPS26	ENSGALP00000041639	1717	1717	21585	ENSGALP00000027920	Signal peptidase complex subunit 2 homolog	SPCS2	5309200	0	0	0	0	0	0	0	0	0	0	0	0	0							0						110810	66700	0	1698400	1302400	2130900	7.79661e-05	4.29189e-05		0.000327517	0.000261302	0.000414405	1000
1301	ENSGALP00000024821	SDR16C5	ENSGALP00000024821	1301	1301	73070	ENSGALP00000027982	Stromal interaction molecule 1	STIM1	1155300	0	0	0	0	0	0	0	0	0	0	0	0	0							0						77942	59892	82789	319910	368350	246390	5.48401e-05	3.85382e-05	4.12439e-05	6.1691e-05	7.39024e-05	4.79165e-05	1000
1042	ENSGALP00000018849	ILF2	ENSGALP00000018849	1042	1042	25524	ENSGALP00000027988	Serine/arginine-rich splicing factor 2	SRSF2	2838300	0	0	0	0	0	0	0	0	0	0	0	0	0							0						89713	226670	99054	761560	688710	972560	6.31222e-05	0.000145854	4.93468e-05	0.000146858	0.000138176	0.000189138	1000
304	ENSGALP00000005157	SFXN1	ENSGALP00000005157	304;1610	304	27195	ENSGALP00000027997	Dolichyl-phosphate mannosyltransferase polypeptide 1, catalytic subunit	DPM1	5382000	0	0	0	0	0	0	0	0	0	0	0	0	0							0						244380	187240	115120	1742300	1672400	1420600	0.000171946	0.000120482	5.73505e-05	0.000335983	0.000335535	0.00027627	1000
1681	ENSGALP00000040941	NDUFC2	ENSGALP00000040941	1681	1681	10062	ENSGALP00000028012	Ubiquinol-cytochrome c reductase hinge protein	UQCRH	11844000	0	0	0	0	0	0	0	0	0	0	0	0	0							0						1073100	702120	1402100	3314900	3548900	1803100	0.000755035	0.000451787	0.000698499	0.00063924	0.000712019	0.000350656	1000
1390	ENSGALP00000026487	PDIA6	ENSGALP00000026487	1390	1390	12289	ENSGALP00000028016	Enhancer of rudimentary homolog	ERH	47272000	0	0	0	0	0	0	0	0	0	0	0	0	0							0						3680400	2931000	4919000	10303000	13943000	11496000	0.00258954	0.00188599	0.00245055	0.00198681	0.0027974	0.00223567	1000
1512	ENSGALP00000034254;ENSGALP00000043362;ENSGALP00000019314	CDC42;RHOG;RHOJ	ENSGALP00000034254	512;1512	1512	82125	ENSGALP00000028049	Junction plakoglobin	JUP	4304500	139500	0	287860	29336	28333	22103	5	66717	0	84089	14421	35806	17873	0.000901037		0.000851972	0.000610128	0.000825811	0.000652886	5	0.000768367	0.000128711	5.25461e-05			212350	216980	1013600	650260	782910	702390	0.00014941	0.000139618	0.000504956	0.000125395	0.000157076	0.000136597	1000
1300	ENSGALP00000024757	ATP5I	ENSGALP00000024757	1300	1300	21651	ENSGALP00000028073	ADP-ribosylation-like factor 6 interacting protein 5	ARL6IP5	34782000	0	0	0	0	0	0	0	0	0	0	0	0	0							0						928770	356350	905620	11282000	10779000	10531000	0.000653484	0.000229298	0.000451162	0.0021756	0.0021626	0.00204801	1000
479	ENSGALP00000008128	NUP210	ENSGALP00000008128	479	479	25265	ENSGALP00000028214	Ankyrin repeat domain 46	ANKRD46	754370	0	0	0	0	0	0	0	0	0	0	0	0	0							0						155310	122890	0	249410	226760	0	0.000109276	7.9075e-05		4.80958e-05	4.54951e-05		1000
1564	ENSGALP00000036720	DYNC1H1	ENSGALP00000036720	1564	1564	13583	ENSGALP00000028277	H2A histone family, member Z	H2AFZ	124370000	0	0	0	0	0	0	0	0	0	0	0	0	0							0						8803800	5790500	17258000	31801000	33117000	27600000	0.00619437	0.00372597	0.0085976	0.00613246	0.00664429	0.00536749	1000
1113	ENSGALP00000020445;ENSGALP00000001182;ENSGALP00000012485;ENSGALP00000022340;ENSGALP00000001418;ENSGALP00000041897;ENSGALP00000042123;ENSGALP00000039087;ENSGALP00000001422;ENSGALP00000001425	MYH1;MYH13;MYH1C;MYH1D;MYH3;MYH4;MYH6;MYH7B;MYH8;MYH9	ENSGALP00000020445	1113;1237	1113	16946	ENSGALP00000028374	VAMP (vesicle-associated membrane protein)-associated protein A, 33kDa	VAPA	19155000	0	0	0	0	0	0	0	0	0	0	0	23568	0					0.00054356		1	0.00054356			0.00441929	#VALUE!	972230	1052100	2316100	4963900	4631800	5195000	0.000684063	0.000676986	0.00115384	0.000957231	0.000929282	0.00101029	1000	0.00441929
1179	ENSGALP00000021957	SYNE1	ENSGALP00000021957	1179	1179	27775	ENSGALP00000028746	Tyrosine 3-monooxygenase/tryptophan 5-monooxygenase activation protein, zeta polypeptide	YWHAZ	10208000	88497	0	0	0	0	0	1	0	0	35468	0	0	0			0.000359354				1	0.000359354					655820	466530	364160	2917300	2707200	2973100	0.000461436	0.000300194	0.000181417	0.000562568	0.000543148	0.000578191	1000
890	ENSGALP00000015687	COL1A2	ENSGALP00000015687	890	890	14821	ENSGALP00000028747	Heat-responsive protein 12	HRSP12	50657	0	0	0	0	0	0	0	0	0	0	0	0	0							0						0	0	0	0	0	50657						9.85148e-06	1000
1060	ENSGALP00000019200	ITGB5	ENSGALP00000019200	1060	1060	115180	ENSGALP00000028857	Oxoglutarate (alpha-ketoglutarate) dehydrogenase (lipoamide)	OGDH	468880	0	0	0	0	0	0	0	0	0	0	0	0	0							0						70641	21997	59689	71631	122010	122910	4.97031e-05	1.41542e-05	2.97359e-05	1.38132e-05	2.4479e-05	2.39028e-05	1000
1570	ENSGALP00000037103	REEP5	ENSGALP00000037103	1570	1570	24289	ENSGALP00000028958_family	Family {Hydroxysteroid (17-beta) dehydrogenase 10}	HSD17B10	3832660	0	0	0	0	0	0	0	0	0	0	0	0	0							0						277090	158300	363160	1063600	953290	1017210	0.000194961	0.00010186	0.000180919	0.000205103	0.000191259	0.000197821	1000
1447	ENSGALP00000028277;ENSGALP00000022676	H2AFV;H2AFZ	ENSGALP00000022676;ENSGALP00000028277	1447;1670	1447	30500	ENSGALP00000028961	Voltage-dependent anion channel 3	VDAC3	28983000	0	0	0	0	0	0	0	0	0	0	0	0	0							0						1982600	940950	2486800	6000100	8642900	8929300	0.00139496	0.000605465	0.00123888	0.00115705	0.00173403	0.00173652	1000
481	ENSGALP00000008132	C1ORF27	ENSGALP00000008132	481	481	53251	ENSGALP00000029109	Proteasome (prosome, macropain) 26S subunit, non-ATPase, 3	PSMD3	226520	0	0	0	0	0	0	0	0	0	0	0	0	0							0						0	0	20008	92578	83621	30311			9.9676e-06	1.78526e-05	1.6777e-05	5.89471e-06	1000
1787	ENSGALP00000042837	HNRNPA1	ENSGALP00000042837	1787	1787	11682	ENSGALP00000029144	Ethylmalonic encephalopathy 1	ETHE1	282240	0	0	0	0	0	0	0	0	0	0	0	0	0							0						0	0	33527	0	0	248710			1.67025e-05			4.83677e-05	1000
1464	ENSGALP00000030005	UBE2N	ENSGALP00000030005	1464	1464	22181	ENSGALP00000029249	Tumor protein D52-like 2	TPD52L2	802630	0	0	0	0	0	0	0	0	0	0	0	0	0							0						0	0	57594	253610	272530	218900			2.86922e-05	4.89058e-05	5.46779e-05	4.25704e-05	1000
1392	ENSGALP00000026567	SF3B14	ENSGALP00000026567	1392	1392	27595	ENSGALP00000029322	RNA binding motif protein 4B	RBM4B	1101600	0	0	0	0	0	0	0	0	0	0	0	0	0							0						155340	107920	166930	223360	299260	148840	0.000109297	6.94424e-05	8.31613e-05	4.30724e-05	6.00408e-05	2.89455e-05	1000
1221	ENSGALP00000023165	HNRNPK	ENSGALP00000023165	1221	1221	21163	ENSGALP00000029365	Tumor protein p53 inducible protein 11 (TP53I11	TP53I11	856140	0	0	0	0	0	0	0	0	0	0	0	0	0							0						0	0	0	0	324820	531320					6.51689e-05	0.000103328	1000
1847	REV__ENSGALP00000042324	REV__ENSGALP00000042324	REV__ENSGALP00000042324	1847	1847	24969	ENSGALP00000029405	CD9 molecule	CD9	50771000	0	0	0	0	0	0	0	0	0	0	0	0	0							0						3198700	2178500	4069300	12794000	15307000	13223000	0.00225061	0.00140178	0.00202725	0.00246718	0.00307106	0.00257153	1000
1404	ENSGALP00000027063	MRPS9	ENSGALP00000027063	1404	1404	28266	ENSGALP00000029700	ES1 protein homolog, class I glutamine amidotransferase-like	C21ORF33	352770	0	0	0	0	0	0	0	0	0	0	0	0	0							0						0	0	0	116930	65877	169960				2.25486e-05	1.3217e-05	3.30528e-05	1000
615	ENSGALP00000038505;ENSGALP00000010631	POFUT1;Q8AWB4	ENSGALP00000010631;ENSGALP00000038505	615	615	38554	ENSGALP00000029745	Coxsackie virus and adenovirus receptor	CXADR	855060	0	0	0	0	0	0	0	0	0	0	0	0	0							0						0	22623	35276	192780	363880	240500		1.4557e-05	1.75738e-05	3.71754e-05	7.30056e-05	4.6771e-05	1000
1491	ENSGALP00000033050;ENSGALP00000041539;ENSGALP00000001257	SLC7A5;SLC7A6	ENSGALP00000033050;ENSGALP00000041539	1491	1491	37394	ENSGALP00000029822	Limbic system-associated membrane protein	LSAMP	781380	0	0	0	0	0	0	0	0	0	0	0	0	0							0						50837	36454	62774	220600	342450	68261	3.5769e-05	2.34568e-05	3.12728e-05	4.25402e-05	6.8706e-05	1.3275e-05	1000
1696	ENSGALP00000041235	CLDN3	ENSGALP00000041235	1696	1696	24741	ENSGALP00000029965	Translocase of outer mitochondrial membrane 22 homolog	TOMM22	5960100	0	0	0	0	0	0	0	0	0	0	0	0	0							0						446780	152800	494430	1629000	1717000	1520100	0.000314355	9.8321e-05	0.000246315	0.000314134	0.000344483	0.00029562	1000
1462	ENSGALP00000029965	TOMM22	ENSGALP00000029965	1462	1462	46085	ENSGALP00000029968	Ribosomal protein L3	RPL3	4661400	0	0	0	0	0	0	0	0	0	0	0	0	0							0						458980	288490	497630	1195100	1278700	942530	0.000322939	0.000185632	0.00024791	0.000230461	0.000256547	0.000183298	1000
1139	ENSGALP00000021119	FAM105A	ENSGALP00000021119	1139	1139	16001	ENSGALP00000030005	Ubiquitin-conjugating enzyme E2N	UBE2N	840500	0	0	0	0	0	0	0	0	0	0	0	0	0							0						0	78033	142040	151990	235960	232480		5.02113e-05	7.07616e-05	2.93095e-05	4.73409e-05	4.52114e-05	1000
657	ENSGALP00000011493	LRRC15	ENSGALP00000011493	657	657	20960	ENSGALP00000030135	Mitochondrial ribosomal protein L13 (MRPL13), nuclear gene encoding mitochondrial protein, mRNA.	MRPL13	123290	0	0	0	0	0	0	0	0	0	0	0	0	0							0						29186	25375	36295	32433	0	0	2.05353e-05	1.63278e-05	1.80815e-05	6.25433e-06			1000
1587	ENSGALP00000037734	FUT8	ENSGALP00000037734	1587	1587	19863	ENSGALP00000030175	Mal, T-cell differentiation protein 2 (MAL2	MAL2	5745700	0	0	0	0	0	0	0	0	0	0	0	0	0							0						176870	0	0	1702700	2021100	1844900	0.000124446			0.000328346	0.000405495	0.000358785	1000
878	ENSGALP00000015519	SLC25A12	ENSGALP00000015519	877;878	878	11573	ENSGALP00000030179	Enhancer of yellow 2 homolog	ENY2	764950	0	0	0	0	0	0	0	0	0	0	0	0	0							0						0	0	0	351330	0	413620				6.77499e-05		8.04384e-05	1000
1647	ENSGALP00000039734;ENSGALP00000006295	RPL11;TCEB3	ENSGALP00000006295;ENSGALP00000039734	1647	1647	8791.4	ENSGALP00000030189	Cytochrome c oxidase subunit VIc	COX6C	89009000	0	0	0	0	0	0	0	0	0	0	0	0	0							0						8306900	7324300	11211000	21585000	15376000	25206000	0.00584475	0.00471291	0.0055851	0.00416242	0.0030849	0.00490192	1000
1497	ENSGALP00000033411	RPS21	ENSGALP00000033411	1497	1497	19911	ENSGALP00000030296	Myosin, light chain 12A, regulatory, non-sarcomeric	MYL12A	7053300	0	0	0	0	0	0	0	0	0	0	0	0	0							0						496710	260030	654720	1863700	1822900	1955200	0.000349486	0.000167319	0.000326169	0.000359393	0.00036573	0.000380236	1000
1418	ENSGALP00000027304	LMO7	ENSGALP00000027304	1418	1418	23490	ENSGALP00000030639	RAB6A, member RAS oncogene family	RAB6A	23139000	0	0	0	0	0	0	0	0	0	49963	0	49897	0			0.000506215		0.0011508		2	0.000828506	0.00045579	0.000186075	0.00673598	0.00277125	1299300	831080	1815000	5888300	6363500	6842400	0.00091419	0.000534768	0.000904198	0.00113549	0.00127671	0.00133067	1000	0.00673598
1654	ENSGALP00000040036	THY1	ENSGALP00000040036	1654	1654	10658	ENSGALP00000030672	HIG1 hypoxia inducible domain family, member 1A	HIGD1A	13642000	0	0	0	0	0	0	0	0	0	0	0	0	0							0						1182900	956940	1302300	3354600	3368800	3476100	0.00083229	0.000615754	0.00064878	0.000646896	0.000675885	0.000676012	1000
706	ENSGALP00000012301	MGRN1	ENSGALP00000012301	706	706	57137	ENSGALP00000030701	Gliomedin	GLDN	27771	0	0	0	0	0	0	0	0	0	0	0	0	0							0						0	0	0	15230	0	12540				2.93693e-06		2.43871e-06	1000
1397	ENSGALP00000026707	OTOF	ENSGALP00000026707	1397	1397	25222	ENSGALP00000030998	Glutathione S-transferase alpha 1	GSTA1	0	0	0	0	0	0	0	0	0	0	0	0	0	0							0						0	0	0	0	0	0							1000
[truncated: 415 more rows]
[truncated: 14 more columns]
