# Supplementary material for: PDZD7-MYO7A complex identified in enriched stereocilia membranes
Source: eLife. 2016 Aug 15;5:e18312. doi: 10.7554/eLife.18312 (PMC5005036; doi:10.7554/eLife.18312)
Supplement: Figure 4—source data 1. — DOI: http://dx.doi.org/10.7554/eLife.18312.015 [file elife-18312-fig4-data1.xls]

## Sheet: Read me
File:	Figure 4—Source data 1 (138-1 targeted)
In support of:	Morgan et al. "PDZD7-MYO7A Complex Identified in Enriched Stereocilia Membranes"
General comments:	Master data file for processed data. Skyline output was processed further in additional sheets.
Tabs:	Label	Description
	Read me	Read me
	MYO7A adjustment factor	Table of factors for adjusting area
	MYO7A	Analysis of MYO7A peptide data
	MYO6	Analysis of MYO6 peptide data
	GIPC3	Analysis of GIPC3 peptide data
	ANKRD24	Analysis of ANKRD24 peptide data
	PDZD7	Analysis of PDZD7 peptide data
	ADGRV1	Analysis of ADGRV1 peptide data
	USH1C	Analysis of USH1C peptide data
	USH1G	Analysis of USH1G peptide data
Samples:	Source	Sample name	RAW data file names
	Control immunoprecipitation, biological replicate 1, technical replicate 1	GIL1649_IP_CTRL	GIL1649_IP_CTRL_Tgt2_20150223_OT
	Control immunoprecipitation, biological replicate 1, technical replicate 2	GIL1649_IP_CTRL_2	GIL1649_IP_CTRL_2_Tgt2_20150324_OT
	Control immunoprecipitation, biological replicate 2, technical replicate 1	GIL1651_CtrlIP_Elut	GIL1651_CtrlIP_Elut_tgt2_20150330_OT
	Control immunoprecipitation, biological replicate 2, technical replicate 2	GIL1651_CtrlIP_Elut_2	GIL1651_CtrlIP_Elut_tgt2_2_20150331_OT
	Control immunoprecipitation, biological replicate 3, technical replicate 1	GILL-185_CtrlIP_inj1	GILL-185_CtrlIP_RIPA_100ear_inj1_tgt2_95min_20160226_OT
	Control immunoprecipitation, biological replicate 3, technical replicate 2	GILL-185_CtrlIP_inj2	GILL-185_CtrlIP_RIPA_100ear_inj2_tgt2_95min_20160226_OT
	Control immunoprecipitation, biological replicate 4, technical replicate 1	GILL201_CtrlIP_inj1	GILL201_CtrlIP_RIPA_100ear_inj1_tgt2_95min_20160411_OT
	Control immunoprecipitation, biological replicate 4, technical replicate 2	GILL201_CtrlIP_inj2	GILL201_CtrlIP_RIPA_100ear_inj2_tgt2_95min_20160411_OT
	138-1 immunoprecipitation, biological replicate 1, technical replicate 1	GIL1649_IP_MYO7	GIL1649_IP_MYO7_Tgt2_20150223_OT
	138-1 immunoprecipitation, biological replicate 1, technical replicate 2	GIL1649_IP_MYO7_2	GIL1649_IP_MYO7_Tgt2_2_20150324_OT
	138-1 immunoprecipitation, biological replicate 2, technical replicate 1	GIL1651_Myo7IP	GIL1651_Myo7IP_Elut_tgt2_20150330_OT
	138-1 immunoprecipitation, biological replicate 2, technical replicate 2	GIL1651_Myo7IP_Elut_2	GIL1651_Myo7IP_Elut_tgt2_2_20150331_OT
	138-1 immunoprecipitation, biological replicate 3, technical replicate 1	GILL-185_Myo7IP_inj1	GILL-185_Myo7IP_RIPA_100ear_inj1_tgt2_95min_20160226_OT
	138-1 immunoprecipitation, biological replicate 3, technical replicate 2	GILL-185_Myo7IP_inj2	GILL-185_Myo7IP_RIPA_100ear_inj2_tgt2_95min_20160226_OT
	138-1 immunoprecipitation, biological replicate 4, technical replicate 1	GILL201_Myo7IP_inj1	GILL201_Myo7IP_RIPA_100ear_inj1_tgt2_95min_20160411_OT
	138-1 immunoprecipitation, biological replicate 4, technical replicate 2	GILL201_Myo7IP_inj2	GILL201_Myo7IP_RIPA_100ear_inj2_tgt2_95min_20160411_OT
	138-1 immunoprecipitation, biological replicate 1, technical replicate 1	GIL1649_IP_TOT1	GIL1649_IP_TOT1_tgt2_20150331_OT
	Total (S7), biological replicate 1, technical replicate 1	GIL1649_IP_TOT3	GIL1649_IP_TOT3_tgt2_20150331_OT
	Total (S7), biological replicate 2, technical replicate 1	GIL1651_IP_TOT_1	GIL1651_IP_TOT_1_tgt2_20150330_OT
	Total (S7), biological replicate 2, technical replicate 2	GIL1651_IP_TOT_2	GIL1651_IP_TOT_2_tgt2_20150330_OT
	Total (S7), biological replicate 2, technical replicate 3	GIL1651_IP_TOT_3	GIL1651_IP_TOT_3_tgt2_20150330_OT
	Total (S7), biological replicate 2, technical replicate 4	GIL1651_IP_TOT1	GIL1651_IP_TOT1_tgt2_2_20150331_OT
	Total (S7), biological replicate 2, technical replicate 5	GIL1651_IP_TOT2	GIL1651_IP_TOT2_tgt2_2_20150331_OT
	Total (S7), biological replicate 2, technical replicate 6	GIL1651_IP_TOT3	GIL1651_IP_TOT3_tgt2_2_20150331_OT
	Total (S7), biological replicate 3, technical replicate 1	GILL-185_TOT_inj1	GILL-185_TOT_RIPA_4ear_inj1_tgt2_95min_20160226_OT
	Total (S7), biological replicate 3, technical replicate 2	GILL-185_TOT_inj2	GILL-185_TOT_RIPA_4ear_inj2_tgt2_95min_20160226_OT
	Total (S7), biological replicate 3, technical replicate 1	GILL201_TOT_inj1	GILL201_TOT_RIPA_4ear_inj1_tgt2_95min_20160411_OT
	Total (S7), biological replicate 3, technical replicate 2	GILL201_TOT_inj2	GILL201_TOT_RIPA_4ear_inj2_tgt2_95min_20160411_OT
Column Headers:	#	Header	Description	Hidden?
	1	Protein symbol	Symbol for analyzed protein	No
	2	Peptide (short)	First three amino acid abbreviation for peptide analyzed	No
	3	Type	Control immunoprecipitation (CON), 138-1 immunoprecipitation (138-1), or S7 starting material (TOT)	Yes
	4	Experiment	OHSU proteomics core code for mass spectrometry data	Yes
	5	Date	Data samples were run	Yes
	6	Replicate file name	File name used for sample	Yes
	7	Peptide sequence	Complete peptide sequence	No
	8	Precursor	Precursor m/z	No
	9	Best retention time	Estimate of retention time	No
	10	Max Fwhm	Maximum full width at half max (FWHM) of the transitions for the particular precursor	No
	11	Average mass error (ppm)	Deviation from predicted mass	Yes
	12	Library dot product	Dot product between library spectrum and observed spectrum	Yes
	13	Total area	Total integrated area within peak boundaries minus background area	Yes
	14	Summary calculations	Calculations of IP/total for control and 138-1	Yes

## Sheet: MYO7A adjustment factor
Date	ELVPQDLVR	IEQYLLEK	LLNLIPSYIPDR	TLLTDSATTAK	ELVPQDLVR	IEQYLLEK	LLNLIPSYIPDR	TLLTDSATTAK	AVG
20150223	101764408	46105104	26260140	59790784	1.57497	1.47324	2.24492	2.71605	2.00229
20150324	44677908	26335204	7826998	8304215	0.781306	0.929491	0.890944	0.377226	0.744742
20150330	42423932	20991636	9209170	869233	0.703431	0.728058	1.02045	0.0394856	0.622857
20150331	39337700	21585888	6001163	19091378	0.593579	0.686444	0.669545	0.867242	0.704202
20160226	117189844	46914266	15160844		1.46966	1.2897	1.45163		1.40367
20160411	42288682	25837720	5727123		1	1	1		1

## Sheet: MYO7A
Protein symbol	Peptide (short)	Type	Experiment	Date	Replicate file name	Peptide sequence	Precursor	Best retention time	Max Fwhm	Average mass error (ppm)	Library dot product	Total area	Area/ MYO7A factor	Summary calculations
MYO7A	ELV	Heavy	GIL-124	20151008	GIL-124_TOTAL_heavy_pt1_tMS2_25cm_95min_20151008_OT	ELVPQDLVR	539.8102++ (heavy)	41.86	0.25	-0.4	0.9764	23935928
MYO7A	ELV	CON	GIL1649	20150223	GIL1649_IP_CTRL_Tgt2_20150223_OT	ELVPQDLVR	534.8060++	#N/A	#N/A	#N/A	0	0	0	CONTROL IP	avg	0	±	0
MYO7A	ELV	CON	GIL1649	20150324	GIL1649_IP_CTRL_2_Tgt2_20150324_OT	ELVPQDLVR	534.8060++	#N/A	#N/A	#N/A	0	0	0		avg/total	0	±	0
MYO7A	ELV	CON	GIL1651	20150330	GIL1651_CtrlIP_Elut_tgt2_20150330_OT	ELVPQDLVR	534.8060++	#N/A	#N/A	#N/A	0	0	0				95% CI =	#NUM!
MYO7A	ELV	CON	GIL1651	20150331	GIL1651_CtrlIP_Elut_tgt2_2_20150331_OT	ELVPQDLVR	534.8060++	#N/A	#N/A	#N/A	0	0	0				SEM=	0
MYO7A	ELV	138-1	GIL1649	20150223	GIL1649_IP_MYO7_Tgt2_20150223_OT	ELVPQDLVR	534.8060++	33.45	0.24	4.9	0.9728	101764408	5.08239e+07	138-1 IP	avg	5.86971e+07	±	7.31072e+06	ttest=	3.70645e-06
MYO7A	ELV	138-1	GIL1649	20150324	GIL1649_IP_MYO7_Tgt2_2_20150324_OT	ELVPQDLVR	534.8060++	37.31	0.25	-0.4	0.9523	44677908	5.99911e+07		avg/total	12.8544	±	1.60102	n=	4
MYO7A	ELV	138-1	GIL1651	20150330	GIL1651_Myo7IP_Elut_tgt2_20150330_OT	ELVPQDLVR	534.8060++	36.19	0.24	-1.5	0.9569	42423932	6.81118e+07				95% CI =	1.56897
MYO7A	ELV	138-1	GIL1651	20150331	GIL1651_Myo7IP_Elut_tgt2_2_20150331_OT	ELVPQDLVR	534.8060++	36.41	0.34	1.1	0.9562	39337700	5.58613e+07				SEM=	0.80051
MYO7A	ELV	TOT	GIL1649	20150331	GIL1649_IP_TOT1_tgt2_20150331_OT	ELVPQDLVR	534.8060++	36.34	0.31	1.9	0.8793	2134153	3.0306e+06	TOTAL	avg	4.56629e+06	±	1.05663e+06
MYO7A	ELV	TOT	GIL1649	20150331	GIL1649_IP_TOT3_tgt2_20150331_OT	ELVPQDLVR	534.8060++	36.49	0.31	2	0.8786	2071473	2.94159e+06
MYO7A	ELV	TOT	GIL1651	20150330	GIL1651_IP_TOT_1_tgt2_20150330_OT	ELVPQDLVR	534.8060++	37.47	0.32	0.2	0.8958	3060148	4.91308e+06
MYO7A	ELV	TOT	GIL1651	20150330	GIL1651_IP_TOT_2_tgt2_20150330_OT	ELVPQDLVR	534.8060++	36.34	0.29	1	0.8821	3117994	5.00595e+06
MYO7A	ELV	TOT	GIL1651	20150330	GIL1651_IP_TOT_3_tgt2_20150330_OT	ELVPQDLVR	534.8060++	36.64	0.27	-0.5	0.8918	3440006	5.52294e+06
MYO7A	ELV	TOT	GIL1651	20150331	GIL1651_IP_TOT1_tgt2_2_20150331_OT	ELVPQDLVR	534.8060++	36.33	0.21	2.2	0.8855	3055815	4.3394e+06
MYO7A	ELV	TOT	GIL1651	20150331	GIL1651_IP_TOT2_tgt2_2_20150331_OT	ELVPQDLVR	534.8060++	36.03	0.31	0.5	0.8973	3580130	5.08395e+06
MYO7A	ELV	TOT	GIL1651	20150331	GIL1651_IP_TOT3_tgt2_2_20150331_OT	ELVPQDLVR	534.8060++	35.88	0.2	2.3	0.8936	4008896	5.69282e+06
MYO7A	IEQ	Heavy	GIL-124	20151008	GIL-124_TOTAL_heavy_pt1_tMS2_25cm_95min_20151008_OT	IEQYLLEK	522.2968++ (heavy)	32.79	0.3	-0.3	0.9676	12591953
MYO7A	IEQ	CON	GIL1649	20150223	GIL1649_IP_CTRL_Tgt2_20150223_OT	IEQYLLEK	518.2897++	#N/A	#N/A	#N/A	0	0	0	CONTROL IP	avg	0	±	0
MYO7A	IEQ	CON	GIL1649	20150324	GIL1649_IP_CTRL_2_Tgt2_20150324_OT	IEQYLLEK	518.2897++	#N/A	#N/A	#N/A	0	0	0		avg/total	0	±	0
MYO7A	IEQ	CON	GIL1651	20150330	GIL1651_CtrlIP_Elut_tgt2_20150330_OT	IEQYLLEK	518.2897++	#N/A	#N/A	#N/A	0	0	0				95% CI =	#NUM!
MYO7A	IEQ	CON	GIL1651	20150331	GIL1651_CtrlIP_Elut_tgt2_2_20150331_OT	IEQYLLEK	518.2897++	#N/A	#N/A	#N/A	0	0	0				SEM=	0
MYO7A	IEQ	138-1	GIL1649	20150223	GIL1649_IP_MYO7_Tgt2_20150223_OT	IEQYLLEK	518.2897++	25.53	0.24	4.8	0.9643	46105104	2.30261e+07	138-1 IP	avg	3.06857e+07	±	5.46603e+06	ttest=	2.98195e-05
MYO7A	IEQ	138-1	GIL1649	20150324	GIL1649_IP_MYO7_Tgt2_2_20150324_OT	IEQYLLEK	518.2897++	29.2	0.26	-0.3	0.9537	26335204	3.53615e+07		avg/total	17.1609	±	3.05687	n=	4
MYO7A	IEQ	138-1	GIL1651	20150330	GIL1651_Myo7IP_Elut_tgt2_20150330_OT	IEQYLLEK	518.2897++	28.15	0.25	-0.8	0.9685	20991636	3.37022e+07				95% CI =	2.99567
MYO7A	IEQ	138-1	GIL1651	20150331	GIL1651_Myo7IP_Elut_tgt2_2_20150331_OT	IEQYLLEK	518.2897++	28.39	0.25	1.3	0.9685	21585888	3.0653e+07				SEM=	1.52843
MYO7A	IEQ	TOT	GIL1649	20150331	GIL1649_IP_TOT1_tgt2_20150331_OT	IEQYLLEK	518.2897++	28.39	0.2	1.7	0.9336	1783746	2.533e+06	TOTAL	avg	1.78811e+06	±	329078
MYO7A	IEQ	TOT	GIL1649	20150331	GIL1649_IP_TOT3_tgt2_20150331_OT	IEQYLLEK	518.2897++	28.64	0.23	1.6	0.9296	1305229	1.85349e+06
MYO7A	IEQ	TOT	GIL1651	20150330	GIL1651_IP_TOT_1_tgt2_20150330_OT	IEQYLLEK	518.2897++	29.37	0.47	0.1	0.8924	1018824	1.63573e+06
MYO7A	IEQ	TOT	GIL1651	20150330	GIL1651_IP_TOT_2_tgt2_20150330_OT	IEQYLLEK	518.2897++	28.47	0.3	0.3	0.8704	1134578	1.82157e+06
MYO7A	IEQ	TOT	GIL1651	20150330	GIL1651_IP_TOT_3_tgt2_20150330_OT	IEQYLLEK	518.2897++	28.47	0.23	0.2	0.8946	1120732	1.79934e+06
MYO7A	IEQ	TOT	GIL1651	20150331	GIL1651_IP_TOT1_tgt2_2_20150331_OT	IEQYLLEK	518.2897++	28.31	0.21	2.7	0.9223	1097434	1.55841e+06
MYO7A	IEQ	TOT	GIL1651	20150331	GIL1651_IP_TOT2_tgt2_2_20150331_OT	IEQYLLEK	518.2897++	28.15	0.22	0.4	0.8853	1043179	1.48136e+06
MYO7A	IEQ	TOT	GIL1651	20150331	GIL1651_IP_TOT3_tgt2_2_20150331_OT	IEQYLLEK	518.2897++	27.98	0.22	1.4	0.905	1142231	1.62202e+06
MYO7A	LLN	Heavy	GIL-124	20151008	GIL-124_TOTAL_heavy_pt1_tMS2_25cm_95min_20151008_OT	LLNLIPSYIPDR	712.4128++ (heavy)	61.33	0.35	-0.2	0.9773	80150768
MYO7A	LLN	CON	GIL1649	20150223	GIL1649_IP_CTRL_Tgt2_20150223_OT	LLNLIPSYIPDR	707.4087++	#N/A	#N/A	#N/A	0	0	0	CONTROL IP	avg	0	±	0
MYO7A	LLN	CON	GIL1649	20150324	GIL1649_IP_CTRL_2_Tgt2_20150324_OT	LLNLIPSYIPDR	707.4087++	#N/A	#N/A	#N/A	0	0	0		avg/total	0	±	0
MYO7A	LLN	CON	GIL1651	20150330	GIL1651_CtrlIP_Elut_tgt2_20150330_OT	LLNLIPSYIPDR	707.4087++	#N/A	#N/A	#N/A	0	0	0				95% CI =	#NUM!
MYO7A	LLN	CON	GIL1651	20150331	GIL1651_CtrlIP_Elut_tgt2_2_20150331_OT	LLNLIPSYIPDR	707.4087++	#N/A	#N/A	#N/A	0	0	0				SEM=	0
MYO7A	LLN	138-1	GIL1649	20150223	GIL1649_IP_MYO7_Tgt2_20150223_OT	LLNLIPSYIPDR	707.4087++	51.35	0.35	4.6	0.9913	26260140	1.3115e+07	138-1 IP	avg	1.1733e+07	±	2.77094e+06	ttest=	0.000148166
MYO7A	LLN	138-1	GIL1649	20150324	GIL1649_IP_MYO7_Tgt2_2_20150324_OT	LLNLIPSYIPDR	707.4087++	54.94	0.36	-0.9	0.9356	7826998	1.05097e+07		avg/total	12.8719	±	3.03993	n=	4
MYO7A	LLN	138-1	GIL1651	20150330	GIL1651_Myo7IP_Elut_tgt2_20150330_OT	LLNLIPSYIPDR	707.4087++	54.08	0.28	-1.9	0.9362	9209170	1.47854e+07				95% CI =	2.97907
MYO7A	LLN	138-1	GIL1651	20150331	GIL1651_Myo7IP_Elut_tgt2_2_20150331_OT	LLNLIPSYIPDR	707.4087++	54.19	0.33	0.7	0.9341	6001163	8.52193e+06				SEM=	1.51996
MYO7A	LLN	TOT	GIL1649	20150331	GIL1649_IP_TOT1_tgt2_20150331_OT	LLNLIPSYIPDR	707.4087++	54.08	0.31	2	0.7653	329916	468496	TOTAL	avg	911517	±	356875
MYO7A	LLN	TOT	GIL1649	20150331	GIL1649_IP_TOT3_tgt2_20150331_OT	LLNLIPSYIPDR	707.4087++	54.24	0.23	2.3	0.7571	213816	303629
MYO7A	LLN	TOT	GIL1651	20150330	GIL1651_IP_TOT_1_tgt2_20150330_OT	LLNLIPSYIPDR	707.4087++	54.95	0.29	0.1	0.8311	722565	1.16008e+06
MYO7A	LLN	TOT	GIL1651	20150330	GIL1651_IP_TOT_2_tgt2_20150330_OT	LLNLIPSYIPDR	707.4087++	54.24	0.33	1.1	0.8432	788428	1.26582e+06
MYO7A	LLN	TOT	GIL1651	20150330	GIL1651_IP_TOT_3_tgt2_20150330_OT	LLNLIPSYIPDR	707.4087++	54.39	0.33	0.8	0.7831	776725	1.24704e+06
MYO7A	LLN	TOT	GIL1651	20150331	GIL1651_IP_TOT1_tgt2_2_20150331_OT	LLNLIPSYIPDR	707.4087++	54.38	0.33	0.7	0.8064	683345	970381
MYO7A	LLN	TOT	GIL1651	20150331	GIL1651_IP_TOT2_tgt2_2_20150331_OT	LLNLIPSYIPDR	707.4087++	54.08	0.3	1.6	0.7798	588750	836052
MYO7A	LLN	TOT	GIL1651	20150331	GIL1651_IP_TOT3_tgt2_2_20150331_OT	LLNLIPSYIPDR	707.4087++	53.78	0.33	1.1	0.8103	732818	1.04064e+06
MYO7A	TLL	Heavy	GIL-124	20151008	GIL-124_TOTAL_heavy_pt1_tMS2_25cm_95min_20151008_OT	TLLTDSATTAK	565.3132++ (heavy)	30.5	0.16	3.9	0.4687	60394
MYO7A	TLL	CON	GIL1649	20150223	GIL1649_IP_CTRL_Tgt2_20150223_OT	TLLTDSATTAK	561.3061++	#N/A	#N/A	#N/A	0	0	0	CONTROL IP	avg	0	±	0
MYO7A	TLL	CON	GIL1649	20150324	GIL1649_IP_CTRL_2_Tgt2_20150324_OT	TLLTDSATTAK	561.3061++	#N/A	#N/A	#N/A	0	0	0		avg/total	0	±	0
MYO7A	TLL	CON	GIL1651	20150330	GIL1651_CtrlIP_Elut_tgt2_20150330_OT	TLLTDSATTAK	561.3061++	#N/A	#N/A	#N/A	0	0	0				95% CI =	#NUM!
MYO7A	TLL	CON	GIL1651	20150331	GIL1651_CtrlIP_Elut_tgt2_2_20150331_OT	TLLTDSATTAK	561.3061++	#N/A	#N/A	#N/A	0	0	0				SEM=	0
MYO7A	TLL	138-1	GIL1649	20150223	GIL1649_IP_MYO7_Tgt2_20150223_OT	TLLTDSATTAK	561.3061++	19.34	0.34	4.5	0.9742	59790784	2.98611e+07	138-1 IP	avg	1.73794e+07	±	1.34756e+07	ttest=	0.0418032
MYO7A	TLL	138-1	GIL1649	20150324	GIL1649_IP_MYO7_Tgt2_2_20150324_OT	TLLTDSATTAK	561.3061++	21.65	0.19	-0.3	0.981	8304215	1.11505e+07		avg/total	11.5412	±	8.94874	n=	4
MYO7A	TLL	138-1	GIL1651	20150330	GIL1651_Myo7IP_Elut_tgt2_20150330_OT	TLLTDSATTAK	561.3061++	20.6	0.28	-1.2	0.8736	869233	1.39556e+06				95% CI =	8.7696
MYO7A	TLL	138-1	GIL1651	20150331	GIL1651_Myo7IP_Elut_tgt2_2_20150331_OT	TLLTDSATTAK	561.3061++	20.75	0.27	1.4	0.9975	19091378	2.71106e+07				SEM=	4.47437
MYO7A	TLL	TOT	GIL1649	20150331	GIL1649_IP_TOT1_tgt2_20150331_OT	TLLTDSATTAK	561.3061++	21.01	0.27	0.3	0.9018	2169245	3.08043e+06	TOTAL	avg	1.50586e+06	±	1.4313e+06
MYO7A	TLL	TOT	GIL1649	20150331	GIL1649_IP_TOT3_tgt2_20150331_OT	TLLTDSATTAK	561.3061++	21.32	0.32	1.7	0.909	1715575	2.4362e+06
MYO7A	TLL	TOT	GIL1651	20150330	GIL1651_IP_TOT_1_tgt2_20150330_OT	TLLTDSATTAK	561.3061++	19.84	0.28	9.1	0.567	339754	545477
MYO7A	TLL	TOT	GIL1651	20150330	GIL1651_IP_TOT_2_tgt2_20150330_OT	TLLTDSATTAK	561.3061++	21.01	0.2	-7.3	0.7686	136270	218782
MYO7A	TLL	TOT	GIL1651	20150330	GIL1651_IP_TOT_3_tgt2_20150330_OT	TLLTDSATTAK	561.3061++	#N/A	#N/A	#N/A	0	0	0
MYO7A	TLL	TOT	GIL1651	20150331	GIL1651_IP_TOT1_tgt2_2_20150331_OT	TLLTDSATTAK	561.3061++	#N/A	#N/A	#N/A	0	0	0
MYO7A	TLL	TOT	GIL1651	20150331	GIL1651_IP_TOT2_tgt2_2_20150331_OT	TLLTDSATTAK	561.3061++	20.86	0.31	0.1	0.8757	2178282	3.09326e+06
MYO7A	TLL	TOT	GIL1651	20150331	GIL1651_IP_TOT3_tgt2_2_20150331_OT	TLLTDSATTAK	561.3061++	20.56	0.26	0.2	0.924	1882166	2.67276e+06
MYO7A		Heavy	GIL1649	20150223	GIL1649_IP_CTRL_Tgt2_20150223_OT	TLLTDSATTAK	565.3132++ (heavy)	#N/A	#N/A	#N/A	0	0
MYO7A		Heavy	GIL1649	20150223	GIL1649_IP_MYO7_Tgt2_20150223_OT	TLLTDSATTAK	565.3132++ (heavy)	#N/A	#N/A	#N/A	0	0
MYO7A		Heavy	GIL1649	20150324	GIL1649_IP_CTRL_2_Tgt2_20150324_OT	TLLTDSATTAK	565.3132++ (heavy)	#N/A	#N/A	#N/A	0	0
MYO7A		Heavy	GIL1649	20150324	GIL1649_IP_MYO7_Tgt2_2_20150324_OT	TLLTDSATTAK	565.3132++ (heavy)	#N/A	#N/A	#N/A	0	#N/A
MYO7A		Heavy	GIL1649	20150331	GIL1649_IP_TOT1_tgt2_20150331_OT	TLLTDSATTAK	565.3132++ (heavy)	#N/A	#N/A	#N/A	0	#N/A
MYO7A		Heavy	GIL1649	20150331	GIL1649_IP_TOT3_tgt2_20150331_OT	TLLTDSATTAK	565.3132++ (heavy)	#N/A	#N/A	#N/A	0	#N/A
MYO7A		Heavy	GIL1651	20150330	GIL1651_CtrlIP_Elut_tgt2_20150330_OT	TLLTDSATTAK	565.3132++ (heavy)	#N/A	#N/A	#N/A	0	0
MYO7A		Heavy	GIL1651	20150330	GIL1651_IP_TOT_1_tgt2_20150330_OT	TLLTDSATTAK	565.3132++ (heavy)	#N/A	#N/A	#N/A	0	#N/A
MYO7A		Heavy	GIL1651	20150330	GIL1651_IP_TOT_2_tgt2_20150330_OT	TLLTDSATTAK	565.3132++ (heavy)	#N/A	#N/A	#N/A	0	#N/A
MYO7A		Heavy	GIL1651	20150330	GIL1651_IP_TOT_3_tgt2_20150330_OT	TLLTDSATTAK	565.3132++ (heavy)	#N/A	#N/A	#N/A	0	#N/A
MYO7A		Heavy	GIL1651	20150330	GIL1651_Myo7IP_Elut_tgt2_20150330_OT	TLLTDSATTAK	565.3132++ (heavy)	#N/A	#N/A	#N/A	0	0
MYO7A		Heavy	GIL1651	20150331	GIL1651_CtrlIP_Elut_tgt2_2_20150331_OT	TLLTDSATTAK	565.3132++ (heavy)	#N/A	#N/A	#N/A	0	0
MYO7A		Heavy	GIL1651	20150331	GIL1651_IP_TOT1_tgt2_2_20150331_OT	TLLTDSATTAK	565.3132++ (heavy)	#N/A	#N/A	#N/A	0	#N/A
MYO7A		Heavy	GIL1651	20150331	GIL1651_IP_TOT2_tgt2_2_20150331_OT	TLLTDSATTAK	565.3132++ (heavy)	#N/A	#N/A	#N/A	0	#N/A
MYO7A		Heavy	GIL1651	20150331	GIL1651_IP_TOT3_tgt2_2_20150331_OT	TLLTDSATTAK	565.3132++ (heavy)	#N/A	#N/A	#N/A	0	#N/A
MYO7A		Heavy	GIL1651	20150331	GIL1651_Myo7IP_Elut_tgt2_2_20150331_OT	TLLTDSATTAK	565.3132++ (heavy)	#N/A	#N/A	#N/A	0	0

## Sheet: MYO6
Protein symbol	Peptide (short)	Type	Experiment	Date	Replicate file name	Peptide sequence	Precursor	Best retention time	Max Fwhm	Average mass error (ppm)	Library dot product	Total area	Area/ MYO7A factor
MYO6	FAE	Heavy	GIL-124	20151008	GIL-124_TOTAL_heavy_pt1_tMS2_25cm_95min_20151008_OT	FAEFDQIMK	568.7804++ (heavy)	47.52	0.29	-0.5	0.9606	4316212
MYO6	FAE	CON	GIL1649	20150223	GIL1649_IP_CTRL_Tgt2_20150223_OT	FAEFDQIMK	564.7733++	#N/A	#N/A	#N/A	0	0	0	CONTROL IP	avg	0	±	0
MYO6	FAE	CON	GIL1649	20150324	GIL1649_IP_CTRL_2_Tgt2_20150324_OT	FAEFDQIMK	564.7733++	#N/A	#N/A	#N/A	0	0	0		avg/total	0	±	0
MYO6	FAE	CON	GIL1651	20150330	GIL1651_CtrlIP_Elut_tgt2_20150330_OT	FAEFDQIMK	564.7733++	#N/A	#N/A	#N/A	0	0	0				95% CI =	#NUM!
MYO6	FAE	CON	GIL1651	20150331	GIL1651_CtrlIP_Elut_tgt2_2_20150331_OT	FAEFDQIMK	564.7733++	#N/A	#N/A	#N/A	0	0	0
MYO6	FAE	138-1	GIL1649	20150223	GIL1649_IP_MYO7_Tgt2_20150223_OT	FAEFDQIMK	564.7733++	38.45	0.26	4.2	0.9667	5850506	2.9219e+06	138-1 IP	avg	3.75257e+06	±	822286	ttest=	9.72603e-05
MYO6	FAE	138-1	GIL1649	20150324	GIL1649_IP_MYO7_Tgt2_2_20150324_OT	FAEFDQIMK	564.7733++	42.32	0.31	-0.3	0.971	3596229	4.82883e+06		avg/total	0.908998	±	0.199186	n=	4
MYO6	FAE	138-1	GIL1651	20150330	GIL1651_Myo7IP_Elut_tgt2_20150330_OT	FAEFDQIMK	564.7733++	41.11	0.34	-1.6	0.9747	2431384	3.9036e+06				95% CI =	0.195198
MYO6	FAE	138-1	GIL1651	20150331	GIL1651_Myo7IP_Elut_tgt2_2_20150331_OT	FAEFDQIMK	564.7733++	41.42	0.3	1	0.9623	2363261	3.35594e+06				SEM=	0.0995928
MYO6	FAE	TOT	GIL1649	20150331	GIL1649_IP_TOT1_tgt2_20150331_OT	FAEFDQIMK	564.7733++	41.34	0.27	0.9	0.9427	979235	1.39056e+06	TOTAL	avg	4.12824e+06	±	1.77484e+06
MYO6	FAE	TOT	GIL1649	20150331	GIL1649_IP_TOT3_tgt2_20150331_OT	FAEFDQIMK	564.7733++	41.64	0.28	0.5	0.9411	918649	1.30452e+06
MYO6	FAE	TOT	GIL1651	20150330	GIL1651_IP_TOT_1_tgt2_20150330_OT	FAEFDQIMK	564.7733++	42.33	0.21	-0.9	0.9853	3495343	5.61179e+06
MYO6	FAE	TOT	GIL1651	20150330	GIL1651_IP_TOT_2_tgt2_20150330_OT	FAEFDQIMK	564.7733++	41.34	0.29	-0.6	0.9785	3087941	4.9577e+06
MYO6	FAE	TOT	GIL1651	20150330	GIL1651_IP_TOT_3_tgt2_20150330_OT	FAEFDQIMK	564.7733++	41.64	0.18	-0.3	0.9844	3567384	5.72745e+06
MYO6	FAE	TOT	GIL1651	20150331	GIL1651_IP_TOT1_tgt2_2_20150331_OT	FAEFDQIMK	564.7733++	41.48	0.3	0.5	0.976	3165399	4.49501e+06
MYO6	FAE	TOT	GIL1651	20150331	GIL1651_IP_TOT2_tgt2_2_20150331_OT	FAEFDQIMK	564.7733++	41.18	0.22	0.3	0.9814	3569301	5.06857e+06
MYO6	FAE	TOT	GIL1651	20150331	GIL1651_IP_TOT3_tgt2_2_20150331_OT	FAEFDQIMK	564.7733++	40.88	0.33	-0.5	0.9826	3148027	4.47034e+06
MYO6	IVE	Heavy	GIL-124	20151008	GIL-124_TOTAL_heavy_pt1_tMS2_25cm_95min_20151008_OT	IVEANPLLEAFGNAK	797.4400++ (heavy)	59.55	0.27	-0.2	0.8788	56785572
MYO6	IVE	CON	GIL1649	20150223	GIL1649_IP_CTRL_Tgt2_20150223_OT	IVEANPLLEAFGNAK	793.4329++	#N/A	#N/A	#N/A	0	0	0	CONTROL IP	avg	0	±	0
MYO6	IVE	CON	GIL1649	20150324	GIL1649_IP_CTRL_2_Tgt2_20150324_OT	IVEANPLLEAFGNAK	793.4329++	#N/A	#N/A	#N/A	0	0	0		avg/total	0	±	0
MYO6	IVE	CON	GIL1651	20150330	GIL1651_CtrlIP_Elut_tgt2_20150330_OT	IVEANPLLEAFGNAK	793.4329++	#N/A	#N/A	#N/A	0	0	0				95% CI =	#NUM!
MYO6	IVE	CON	GIL1651	20150331	GIL1651_CtrlIP_Elut_tgt2_2_20150331_OT	IVEANPLLEAFGNAK	793.4329++	#N/A	#N/A	#N/A	0	0	0				SEM=	0
MYO6	IVE	138-1	GIL1649	20150223	GIL1649_IP_MYO7_Tgt2_20150223_OT	IVEANPLLEAFGNAK	793.4329++	50.13	0.37	4.1	0.9132	19048724	9.51345e+06	138-1 IP	avg	8.96643e+06	±	1.90331e+06	ttest=	8.12543e-05
MYO6	IVE	138-1	GIL1649	20150324	GIL1649_IP_MYO7_Tgt2_2_20150324_OT	IVEANPLLEAFGNAK	793.4329++	53.57	0.35	-0.8	0.8866	7304249	9.80776e+06		avg/total	1.18139	±	0.250776	n=	4
MYO6	IVE	138-1	GIL1651	20150330	GIL1651_Myo7IP_Elut_tgt2_20150330_OT	IVEANPLLEAFGNAK	793.4329++	52.81	0.34	-2	0.8975	6466129	1.03814e+07				95% CI =	0.245756
MYO6	IVE	138-1	GIL1651	20150331	GIL1651_Myo7IP_Elut_tgt2_2_20150331_OT	IVEANPLLEAFGNAK	793.4329++	52.81	0.33	0.6	0.8941	4340078	6.16311e+06				SEM=	0.125388
MYO6	IVE	TOT	GIL1649	20150331	GIL1649_IP_TOT1_tgt2_20150331_OT	IVEANPLLEAFGNAK	793.4329++	52.71	0.33	0.8	0.89	3419430	4.85575e+06	TOTAL	avg	7.5897e+06	±	2.07273e+06
MYO6	IVE	TOT	GIL1649	20150331	GIL1649_IP_TOT3_tgt2_20150331_OT	IVEANPLLEAFGNAK	793.4329++	53.01	0.33	1.6	0.8838	2770757	3.9346e+06
MYO6	IVE	TOT	GIL1651	20150330	GIL1651_IP_TOT_1_tgt2_20150330_OT	IVEANPLLEAFGNAK	793.4329++	53.73	0.3	0.3	0.8994	5630932	9.04049e+06
MYO6	IVE	TOT	GIL1651	20150330	GIL1651_IP_TOT_2_tgt2_20150330_OT	IVEANPLLEAFGNAK	793.4329++	53.01	0.34	0.9	0.9049	5535204	8.88679e+06
MYO6	IVE	TOT	GIL1651	20150330	GIL1651_IP_TOT_3_tgt2_20150330_OT	IVEANPLLEAFGNAK	793.4329++	53.16	0.33	0.3	0.8943	5785413	9.28851e+06
MYO6	IVE	TOT	GIL1651	20150331	GIL1651_IP_TOT1_tgt2_2_20150331_OT	IVEANPLLEAFGNAK	793.4329++	53.01	0.3	1.1	0.9029	5835272	8.28636e+06
MYO6	IVE	TOT	GIL1651	20150331	GIL1651_IP_TOT2_tgt2_2_20150331_OT	IVEANPLLEAFGNAK	793.4329++	52.71	0.3	0.2	0.8994	5214486	7.40481e+06
MYO6	IVE	TOT	GIL1651	20150331	GIL1651_IP_TOT3_tgt2_2_20150331_OT	IVEANPLLEAFGNAK	793.4329++	52.56	0.36	0.5	0.8918	6352107	9.02029e+06
MYO6	SLG	Heavy	GIL-124	20151008	GIL-124_TOTAL_heavy_pt1_tMS2_25cm_95min_20151008_OT	SLGTLPPHVFAIADK	525.2991+++ (heavy)	46.7	1.96	-0.8	0.8953	31870260
MYO6	SLG	CON	GIL1649	20150223	GIL1649_IP_CTRL_Tgt2_20150223_OT	SLGTLPPHVFAIADK	522.6277+++	#N/A	#N/A	#N/A	0	0	0	CONTROL IP	avg	0	±	0
MYO6	SLG	CON	GIL1649	20150324	GIL1649_IP_CTRL_2_Tgt2_20150324_OT	SLGTLPPHVFAIADK	522.6277+++	#N/A	#N/A	#N/A	0	0	0		avg/total	0	±	0
MYO6	SLG	CON	GIL1651	20150330	GIL1651_CtrlIP_Elut_tgt2_20150330_OT	SLGTLPPHVFAIADK	522.6277+++	#N/A	#N/A	#N/A	0	0	0				95% CI =	#NUM!
MYO6	SLG	CON	GIL1651	20150331	GIL1651_CtrlIP_Elut_tgt2_2_20150331_OT	SLGTLPPHVFAIADK	522.6277+++	#N/A	#N/A	#N/A	0	0	0				SEM=	0
MYO6	SLG	138-1	GIL1649	20150223	GIL1649_IP_MYO7_Tgt2_20150223_OT	SLGTLPPHVFAIADK	522.6277+++	38.12	1.36	4.8	0.9	55380392	2.76585e+07	138-1 IP	avg	2.1078e+07	±	6.71694e+06	ttest=	0.000760772
MYO6	SLG	138-1	GIL1649	20150324	GIL1649_IP_MYO7_Tgt2_2_20150324_OT	SLGTLPPHVFAIADK	522.6277+++	42.15	1.36	-0.5	0.8951	18963180	2.54628e+07		avg/total	1.2246	±	0.390245	n=	4
MYO6	SLG	138-1	GIL1651	20150330	GIL1651_Myo7IP_Elut_tgt2_20150330_OT	SLGTLPPHVFAIADK	522.6277+++	41.24	1.35	-1.7	0.913	11283434	1.81156e+07				95% CI =	0.382433
MYO6	SLG	138-1	GIL1651	20150331	GIL1651_Myo7IP_Elut_tgt2_2_20150331_OT	SLGTLPPHVFAIADK	522.6277+++	41.55	1.29	0.8	0.9002	9207473	1.3075e+07				SEM=	0.195122
MYO6	SLG	TOT	GIL1649	20150331	GIL1649_IP_TOT1_tgt2_20150331_OT	SLGTLPPHVFAIADK	522.6277+++	41.46	1.29	1.4	0.9135	12798498	1.81745e+07	TOTAL	avg	1.72121e+07	±	1.66099e+06
MYO6	SLG	TOT	GIL1649	20150331	GIL1649_IP_TOT3_tgt2_20150331_OT	SLGTLPPHVFAIADK	522.6277+++	41.46	1.17	1.6	0.9124	10413185	1.47872e+07
MYO6	SLG	TOT	GIL1651	20150330	GIL1651_IP_TOT_1_tgt2_20150330_OT	SLGTLPPHVFAIADK	522.6277+++	42.15	1.37	-0.3	0.9047	11153392	1.79068e+07
MYO6	SLG	TOT	GIL1651	20150330	GIL1651_IP_TOT_2_tgt2_20150330_OT	SLGTLPPHVFAIADK	522.6277+++	41.16	1.21	0.2	0.9037	12042640	1.93345e+07
MYO6	SLG	TOT	GIL1651	20150330	GIL1651_IP_TOT_3_tgt2_20150330_OT	SLGTLPPHVFAIADK	522.6277+++	41.76	1.56	-0.2	0.915	11761200	1.88827e+07
MYO6	SLG	TOT	GIL1651	20150331	GIL1651_IP_TOT1_tgt2_2_20150331_OT	SLGTLPPHVFAIADK	522.6277+++	41.61	1.29	1.9	0.8217	11016921	1.56445e+07
MYO6	SLG	TOT	GIL1651	20150331	GIL1651_IP_TOT2_tgt2_2_20150331_OT	SLGTLPPHVFAIADK	522.6277+++	41.31	1.64	0.4	0.901	11060192	1.5706e+07
MYO6	SLG	TOT	GIL1651	20150331	GIL1651_IP_TOT3_tgt2_2_20150331_OT	SLGTLPPHVFAIADK	522.6277+++	41.01	1.82	0	0.9165	12155145	1.72609e+07

## Sheet: GIPC3
Protein symbol	Peptide (short)	Type	Date	Replicate file name	Peptide Sequence	Precursor	Best retention time	Max Fwhm	Average Mass Error PPM	Library dot product	Total area	Area/ MYO7A factor
GIPC3	IEG	CON	20160226	GILL-185_CtrlIP_RIPA_100ear_inj1_tgt2_95min_20160226_OT	IEGFTNVK	454.248	24.23	#N/A	#N/A	#N/A	0	0	CONTROL IP	avg	37355.9	±	48919.1
GIPC3	IEG	CON	20160226	GILL-185_CtrlIP_RIPA_100ear_inj2_tgt2_95min_20160226_OT	IEGFTNVK	454.248	24.39	0.28	0.5	#N/A	65201	46450.5		avg/total	0.149331	±	0.195556
GIPC3	IEG	CON	20160411	GILL201_CtrlIP_RIPA_100ear_inj1_tgt2_95min_20160411_OT	IEGFTNVK	454.248	24.07	0.21	-0.1	#N/A	102973	102973				95% CI =	0.191641
GIPC3	IEG	CON	20160411	GILL201_CtrlIP_RIPA_100ear_inj2_tgt2_95min_20160411_OT	IEGFTNVK	454.248	24.07	#N/A	#N/A	#N/A	0	0				SEM=	0.0977778
GIPC3	IEG	138-1	20160226	GILL-185_Myo7IP_RIPA_100ear_inj1_tgt2_95min_20160226_OT	IEGFTNVK	454.248	24.23	0.29	-3.6	#N/A	406817	289824	138-1 IP	avg	250154	±	188188	ttest=	0.0711917
GIPC3	IEG	138-1	20160226	GILL-185_Myo7IP_RIPA_100ear_inj2_tgt2_95min_20160226_OT	IEGFTNVK	454.248	22.8	0.23	0	#N/A	639020	455250		avg/total	5.99757	±	4.5119	n=	4
GIPC3	IEG	138-1	20160411	GILL201_Myo7IP_RIPA_100ear_inj1_tgt2_95min_20160411_OT	IEGFTNVK	454.248	24.07	0.37	-0.8	#N/A	255543	255543				95% CI =	4.42158
GIPC3	IEG	138-1	20160411	GILL201_Myo7IP_RIPA_100ear_inj2_tgt2_95min_20160411_OT	IEGFTNVK	454.248	23.28	#N/A	#N/A	#N/A	0	0				SEM=	2.25595
GIPC3	IEG	TOT	20160226	GILL-185_TOT_RIPA_4ear_inj1_tgt2_95min_20160226_OT	IEGFTNVK	454.248	22.96	#N/A	#N/A	#N/A	0	0	TOTAL	avg	41709.3	±	79244.2
GIPC3	IEG	TOT	20160226	GILL-185_TOT_RIPA_4ear_inj2_tgt2_95min_20160226_OT	IEGFTNVK	454.248	23.44	0.24	-6.4	#N/A	37316	26584.7
GIPC3	IEG	TOT	20160411	GILL201_TOT_RIPA_4ear_inj1_tgt2_95min_20160411_OT	IEGFTNVK	454.248	23.12	#N/A	#N/A	#N/A	0	0
GIPC3	IEG	TOT	20160411	GILL201_TOT_RIPA_4ear_inj2_tgt2_95min_20160411_OT	IEGFTNVK	454.248	23.44	0.23	-8.5	#N/A	181962	181962
GIPC3	AQP	CON	20160226	GILL-185_CtrlIP_RIPA_100ear_inj1_tgt2_95min_20160226_OT	AQPFTLR	416.737	26.93	#N/A	#N/A	#N/A	0	0	CONTROL IP	avg	23876.4	±	47752.8
GIPC3	AQP	CON	20160226	GILL-185_CtrlIP_RIPA_100ear_inj2_tgt2_95min_20160226_OT	AQPFTLR	416.737	26.46	#N/A	3.7	#N/A	134058	95505.6		avg/total	0.00966904	±	0.0193381
GIPC3	AQP	CON	20160411	GILL201_CtrlIP_RIPA_100ear_inj1_tgt2_95min_20160411_OT	AQPFTLR	416.737	26.14	#N/A	#N/A	#N/A	0	0				95% CI =	0.018951
GIPC3	AQP	CON	20160411	GILL201_CtrlIP_RIPA_100ear_inj2_tgt2_95min_20160411_OT	AQPFTLR	416.737	26.61	#N/A	#N/A	#N/A	0	0				SEM=	0.00966904
GIPC3	AQP	138-1	20160226	GILL-185_Myo7IP_RIPA_100ear_inj1_tgt2_95min_20160226_OT	AQPFTLR	416.737	26.93	0.32	-2.9	#N/A	4412229	3.14336e+06	138-1 IP	avg	2.46937e+06	±	1.60884e+06	ttest=	0.0228402
GIPC3	AQP	138-1	20160226	GILL-185_Myo7IP_RIPA_100ear_inj2_tgt2_95min_20160226_OT	AQPFTLR	416.737	25.82	0.25	-1.8	#N/A	5943425	4.23421e+06		avg/total	15.6555	±	10.1999	n=	4
GIPC3	AQP	138-1	20160411	GILL201_Myo7IP_RIPA_100ear_inj1_tgt2_95min_20160411_OT	AQPFTLR	416.737	26.3	0.2	-1.2	#N/A	2031669	2031669				95% CI =	9.9957
GIPC3	AQP	138-1	20160411	GILL201_Myo7IP_RIPA_100ear_inj2_tgt2_95min_20160411_OT	AQPFTLR	416.737	25.82	#N/A	4.5	#N/A	468223	468223				SEM=	5.09994
GIPC3	AQP	TOT	20160226	GILL-185_TOT_RIPA_4ear_inj1_tgt2_95min_20160226_OT	AQPFTLR	416.737	25.35	0.32	-3.2	#N/A	741247	528079	TOTAL	avg	157731	±	210066
GIPC3	AQP	TOT	20160226	GILL-185_TOT_RIPA_4ear_inj2_tgt2_95min_20160226_OT	AQPFTLR	416.737	25.66	0.31	-0.3	#N/A	166812	118840
GIPC3	AQP	TOT	20160411	GILL201_TOT_RIPA_4ear_inj1_tgt2_95min_20160411_OT	AQPFTLR	416.737	25.51	0.31	-0.9	#N/A	33237	33237
GIPC3	AQP	TOT	20160411	GILL201_TOT_RIPA_4ear_inj2_tgt2_95min_20160411_OT	AQPFTLR	416.737	25.82	0.26	0.6	#N/A	75763	75763
GIPC3	AQG	CON	20160226	GILL-185_CtrlIP_RIPA_100ear_inj1_tgt2_95min_20160226_OT	AQGPATLQEEPSAVEEEAAR	695.003	33.2	0.25	3.1	#N/A	45952	32737.1	CONTROL IP	avg	8184.28	±	16368.6
GIPC3	AQG	CON	20160226	GILL-185_CtrlIP_RIPA_100ear_inj2_tgt2_95min_20160226_OT	AQGPATLQEEPSAVEEEAAR	695.003	32.17	#N/A	#N/A	#N/A	0	0		avg/total	0.0324636	±	0.0649272
GIPC3	AQG	CON	20160411	GILL201_CtrlIP_RIPA_100ear_inj1_tgt2_95min_20160411_OT	AQGPATLQEEPSAVEEEAAR	695.003	32.01	#N/A	#N/A	#N/A	0	0				95% CI =	0.0636274
GIPC3	AQG	CON	20160411	GILL201_CtrlIP_RIPA_100ear_inj2_tgt2_95min_20160411_OT	AQGPATLQEEPSAVEEEAAR	695.003	32.49	#N/A	#N/A	#N/A	0	0				SEM=	0.0324636
GIPC3	AQG	138-1	20160226	GILL-185_Myo7IP_RIPA_100ear_inj1_tgt2_95min_20160226_OT	AQGPATLQEEPSAVEEEAAR	695.003	32.8	0.32	-2.4	#N/A	399179	284383	138-1 IP	avg	252106	±	111338	ttest=	0.00490153
GIPC3	AQG	138-1	20160226	GILL-185_Myo7IP_RIPA_100ear_inj2_tgt2_95min_20160226_OT	AQGPATLQEEPSAVEEEAAR	695.003	31.85	0.25	-3	#N/A	555414	395688		avg/total	0.830598	±	0.366816	n=	4
GIPC3	AQG	138-1	20160411	GILL201_Myo7IP_RIPA_100ear_inj1_tgt2_95min_20160411_OT	AQGPATLQEEPSAVEEEAAR	695.003	32.01	0.33	-3.5	#N/A	158357	158357				95% CI =	0.359473
GIPC3	AQG	138-1	20160411	GILL201_Myo7IP_RIPA_100ear_inj2_tgt2_95min_20160411_OT	AQGPATLQEEPSAVEEEAAR	695.003	32.17	0.31	-1.2	#N/A	169998	169998				SEM=	0.183408
GIPC3	AQG	TOT	20160226	GILL-185_TOT_RIPA_4ear_inj1_tgt2_95min_20160226_OT	AQGPATLQEEPSAVEEEAAR	695.003	31.69	0.28	-3	#N/A	525135	374116	TOTAL	avg	303524	±	58525.1
GIPC3	AQG	TOT	20160226	GILL-185_TOT_RIPA_4ear_inj2_tgt2_95min_20160226_OT	AQGPATLQEEPSAVEEEAAR	695.003	32.01	0.27	-0.2	#N/A	458876	326912
GIPC3	AQG	TOT	20160411	GILL201_TOT_RIPA_4ear_inj1_tgt2_95min_20160411_OT	AQGPATLQEEPSAVEEEAAR	695.003	32.01	0.18	0	#N/A	243707	243707
GIPC3	AQG	TOT	20160411	GILL201_TOT_RIPA_4ear_inj2_tgt2_95min_20160411_OT	AQGPATLQEEPSAVEEEAAR	695.003	32.33	0.25	0.1	#N/A	269360	269360

## Sheet: ANKRD24
Protein symbol	Peptide (short)	Type	Date	Replicate Name	Peptide Sequence	Precursor Mz	Peptide Retention Time	Max Fwhm	Average Mass Error PPM	Library dot product	Total Area	Area/ MYO7A factor
ANKRD24	LLQ	CON	20160226	GILL-185_CtrlIP_RIPA_100ear_inj1_tgt2_95min_20160226_OT	LLQAVDYNDAGK	653.836	28.63	#N/A	#N/A	#N/A	0	0	CONTROL IP	avg	0	±	0
ANKRD24	LLQ	CON	20160226	GILL-185_CtrlIP_RIPA_100ear_inj2_tgt2_95min_20160226_OT	LLQAVDYNDAGK	653.836	27.84	#N/A	#N/A	#N/A	0	0		avg/total	0	±	0
ANKRD24	LLQ	CON	20160411	GILL201_CtrlIP_RIPA_100ear_inj1_tgt2_95min_20160411_OT	LLQAVDYNDAGK	653.836	27.63	#N/A	#N/A	#N/A	0	0				95% CI =	#NUM!
ANKRD24	LLQ	CON	20160411	GILL201_CtrlIP_RIPA_100ear_inj2_tgt2_95min_20160411_OT	LLQAVDYNDAGK	653.836	28.16	#N/A	#N/A	#N/A	0	0				SEM=	0
ANKRD24	LLQ	138-1	20160226	GILL-185_Myo7IP_RIPA_100ear_inj1_tgt2_95min_20160226_OT	LLQAVDYNDAGK	653.836	28.16	0.33	-0.8	#N/A	767688	546916	138-1 IP	avg	506640	±	210687	ttest=	0.00297206
ANKRD24	LLQ	138-1	20160226	GILL-185_Myo7IP_RIPA_100ear_inj2_tgt2_95min_20160226_OT	LLQAVDYNDAGK	653.836	27.13	0.23	-1.5	#N/A	1093253	778855		avg/total	0.980351	±	0.407681	n=	4
ANKRD24	LLQ	138-1	20160411	GILL201_Myo7IP_RIPA_100ear_inj1_tgt2_95min_20160411_OT	LLQAVDYNDAGK	653.836	27.52	0.38	2	#N/A	284747	284747				95% CI =	0.39952
ANKRD24	LLQ	138-1	20160411	GILL201_Myo7IP_RIPA_100ear_inj2_tgt2_95min_20160411_OT	LLQAVDYNDAGK	653.836	27.29	0.51	2.6	#N/A	416042	416042				SEM=	0.203841
ANKRD24	LLQ	TOT	20160226	GILL-185_TOT_RIPA_4ear_inj1_tgt2_95min_20160226_OT	LLQAVDYNDAGK	653.836	27.13	0.37	0.3	#N/A	978659	697216	TOTAL	avg	516795	±	344179
ANKRD24	LLQ	TOT	20160226	GILL-185_TOT_RIPA_4ear_inj2_tgt2_95min_20160226_OT	LLQAVDYNDAGK	653.836	27.37	0.32	1.6	#N/A	1305417	930005
ANKRD24	LLQ	TOT	20160411	GILL201_TOT_RIPA_4ear_inj1_tgt2_95min_20160411_OT	LLQAVDYNDAGK	653.836	27.37	0.45	-1.5	#N/A	494384	494384
ANKRD24	LLQ	TOT	20160411	GILL201_TOT_RIPA_4ear_inj2_tgt2_95min_20160411_OT	LLQAVDYNDAGK	653.836	27.68	0.37	2.5	#N/A	462369	462369
ANKRD24	LQA	CON	20160226	GILL-185_CtrlIP_RIPA_100ear_inj1_tgt2_95min_20160226_OT	LQAELAAAVPR	569.833	32.76	#N/A	#N/A	#N/A	0	0	CONTROL IP	avg	0	±	0
ANKRD24	LQA	CON	20160226	GILL-185_CtrlIP_RIPA_100ear_inj2_tgt2_95min_20160226_OT	LQAELAAAVPR	569.833	31.97	#N/A	#N/A	#N/A	0	0		avg/total	0	±	0
ANKRD24	LQA	CON	20160411	GILL201_CtrlIP_RIPA_100ear_inj1_tgt2_95min_20160411_OT	LQAELAAAVPR	569.833	31.65	#N/A	#N/A	#N/A	0	0				95% CI =	#NUM!
ANKRD24	LQA	CON	20160411	GILL201_CtrlIP_RIPA_100ear_inj2_tgt2_95min_20160411_OT	LQAELAAAVPR	569.833	32.29	#N/A	#N/A	#N/A	0	0				SEM=	0
ANKRD24	LQA	138-1	20160226	GILL-185_Myo7IP_RIPA_100ear_inj1_tgt2_95min_20160226_OT	LQAELAAAVPR	569.833	32.44	0.3	-3.1	#N/A	1729758	1.23231e+06	138-1 IP	avg	1.08634e+06	±	365548	ttest=	0.00101344
ANKRD24	LQA	138-1	20160226	GILL-185_Myo7IP_RIPA_100ear_inj2_tgt2_95min_20160226_OT	LQAELAAAVPR	569.833	31.49	0.3	-3.1	#N/A	2155783	1.53582e+06		avg/total	0.737129	±	0.248039	n=	4
ANKRD24	LQA	138-1	20160411	GILL201_Myo7IP_RIPA_100ear_inj1_tgt2_95min_20160411_OT	LQAELAAAVPR	569.833	31.65	0.25	-2.2	#N/A	777193	777193				95% CI =	0.243074
ANKRD24	LQA	138-1	20160411	GILL201_Myo7IP_RIPA_100ear_inj2_tgt2_95min_20160411_OT	LQAELAAAVPR	569.833	31.49	0.33	-0.2	#N/A	800049	800049				SEM=	0.12402
ANKRD24	LQA	TOT	20160226	GILL-185_TOT_RIPA_4ear_inj1_tgt2_95min_20160226_OT	LQAELAAAVPR	569.833	31.49	0.28	-3.6	#N/A	4293267	3.05861e+06	TOTAL	avg	1.47375e+06	±	1.22502e+06
ANKRD24	LQA	TOT	20160226	GILL-185_TOT_RIPA_4ear_inj2_tgt2_95min_20160226_OT	LQAELAAAVPR	569.833	31.81	0.29	0.2	#N/A	3329152	2.37175e+06
ANKRD24	LQA	TOT	20160411	GILL201_TOT_RIPA_4ear_inj1_tgt2_95min_20160411_OT	LQAELAAAVPR	569.833	31.66	0.22	1	#N/A	927769	927769
ANKRD24	LQA	TOT	20160411	GILL201_TOT_RIPA_4ear_inj2_tgt2_95min_20160411_OT	LQAELAAAVPR	569.833	31.97	0.63	0.2	#N/A	1010626	1010626
ANKRD24	LAA	CON	20160226	GILL-185_CtrlIP_RIPA_100ear_inj1_tgt2_95min_20160226_OT	LAAVQQQLAEAR	649.365	27.06	#N/A	#N/A	#N/A	0	0	CONTROL IP	avg	3540.5	±	7081
ANKRD24	LAA	CON	20160226	GILL-185_CtrlIP_RIPA_100ear_inj2_tgt2_95min_20160226_OT	LAAVQQQLAEAR	649.365	26.42	#N/A	#N/A	#N/A	0	0		avg/total	0.00640826	±	0.0128165
ANKRD24	LAA	CON	20160411	GILL201_CtrlIP_RIPA_100ear_inj1_tgt2_95min_20160411_OT	LAAVQQQLAEAR	649.365	26.26	#N/A	#N/A	#N/A	0	0				95% CI =	0.01256
ANKRD24	LAA	CON	20160411	GILL201_CtrlIP_RIPA_100ear_inj2_tgt2_95min_20160411_OT	LAAVQQQLAEAR	649.365	26.74	0.31	8.5	#N/A	14162	14162				SEM=	0.00640826
ANKRD24	LAA	138-1	20160226	GILL-185_Myo7IP_RIPA_100ear_inj1_tgt2_95min_20160226_OT	LAAVQQQLAEAR	649.365	26.9	0.17	-2.9	#N/A	1106933	788601	138-1 IP	avg	552490	±	396926	ttest=	0.0326133
ANKRD24	LAA	138-1	20160226	GILL-185_Myo7IP_RIPA_100ear_inj2_tgt2_95min_20160226_OT	LAAVQQQLAEAR	649.365	25.87	0.35	-1.7	#N/A	1335585	951497		avg/total	0.522052	±	0.375059	n=	4
ANKRD24	LAA	138-1	20160411	GILL201_Myo7IP_RIPA_100ear_inj1_tgt2_95min_20160411_OT	LAAVQQQLAEAR	649.365	26.26	0.19	-2.5	#N/A	67586	67586				95% CI =	0.367551
ANKRD24	LAA	138-1	20160411	GILL201_Myo7IP_RIPA_100ear_inj2_tgt2_95min_20160411_OT	LAAVQQQLAEAR	649.365	25.95	0.18	-1	#N/A	402275	402275				SEM=	0.187529
ANKRD24	LAA	TOT	20160226	GILL-185_TOT_RIPA_4ear_inj1_tgt2_95min_20160226_OT	LAAVQQQLAEAR	649.365	25.47	0.32	-3.3	#N/A	1831523	1.30481e+06	TOTAL	avg	1.0583e+06	±	587773
ANKRD24	LAA	TOT	20160226	GILL-185_TOT_RIPA_4ear_inj2_tgt2_95min_20160226_OT	LAAVQQQLAEAR	649.365	25.79	0.18	-0.8	#N/A	2463536	1.75507e+06
ANKRD24	LAA	TOT	20160411	GILL201_TOT_RIPA_4ear_inj1_tgt2_95min_20160411_OT	LAAVQQQLAEAR	649.365	25.63	0.28	-0.6	#N/A	737155	737155
ANKRD24	LAA	TOT	20160411	GILL201_TOT_RIPA_4ear_inj2_tgt2_95min_20160411_OT	LAAVQQQLAEAR	649.365	25.95	0.33	0.9	#N/A	436176	436176

## Sheet: PDZD7
Protein symbol	Peptide (short)	Type	Experiment	Date	Replicate file name	Peptide sequence	Precursor	Best retention time	Max Fwhm	Average mass error (ppm)	Library dot product	Total area	Area/ MYO7A factor
PDZD7	LLS	Heavy	GIL-124	20151008	GIL-124_TOTAL_heavy_pt2_tMS2_25cm_95min_20151008_OT	LLSPDEVTAVLR	661.8813++ (heavy)	56.14	0.33	-0.4	0.9528	68312960
PDZD7	LLS	CON	GIL1649	20150223	GIL1649_IP_CTRL_Tgt2_20150223_OT	LLSPDEVTAVLR	656.8772++	#N/A	#N/A	#N/A	0	0	0	CONTROL IP	avg	0	±	0
PDZD7	LLS	CON	GIL1649	20150324	GIL1649_IP_CTRL_2_Tgt2_20150324_OT	LLSPDEVTAVLR	656.8772++	#N/A	#N/A	#N/A	0	0	0		avg/total	0	±	0
PDZD7	LLS	CON	GIL1651	20150330	GIL1651_CtrlIP_Elut_tgt2_20150330_OT	LLSPDEVTAVLR	656.8772++	#N/A	#N/A	#N/A	0	0	0				95% CI =	#NUM!
PDZD7	LLS	CON	GIL1651	20150331	GIL1651_CtrlIP_Elut_tgt2_2_20150331_OT	LLSPDEVTAVLR	656.8772++	#N/A	#N/A	#N/A	0	0	0				SEM=	0
PDZD7	LLS	138-1	GIL1649	20150223	GIL1649_IP_MYO7_Tgt2_20150223_OT	LLSPDEVTAVLR	656.8772++	46.36	0.42	4.1	0.9759	7518048	3.75472e+06	138-1 IP	avg	3.08706e+06	±	733847	ttest=	0.000153688
PDZD7	LLS	138-1	GIL1649	20150324	GIL1649_IP_MYO7_Tgt2_2_20150324_OT	LLSPDEVTAVLR	656.8772++	50.1	0.35	-0.4	0.9143	2462414	3.3064e+06		avg/total	3.82032	±	0.908157	n=	4
PDZD7	LLS	138-1	GIL1651	20150330	GIL1651_Myo7IP_Elut_tgt2_20150330_OT	LLSPDEVTAVLR	656.8772++	49.19	0.35	-1.5	0.8723	2022425	3.24701e+06				95% CI =	0.889978
PDZD7	LLS	138-1	GIL1651	20150331	GIL1651_Myo7IP_Elut_tgt2_2_20150331_OT	LLSPDEVTAVLR	656.8772++	49.19	0.39	1.1	0.8771	1436640	2.0401e+06				SEM=	0.454079
PDZD7	LLS	TOT	GIL1649	20150331	GIL1649_IP_TOT1_tgt2_20150331_OT	LLSPDEVTAVLR	656.8772++	49.25	0.34	1.2	0.8377	562591	798905	TOTAL	avg	808062	±	151809
PDZD7	LLS	TOT	GIL1649	20150331	GIL1649_IP_TOT3_tgt2_20150331_OT	LLSPDEVTAVLR	656.8772++	49.25	0.31	2.6	0.7625	409284	581202
PDZD7	LLS	TOT	GIL1651	20150330	GIL1651_IP_TOT_1_tgt2_20150330_OT	LLSPDEVTAVLR	656.8772++	50.1	0.28	0.4	0.8314	531450	853245
PDZD7	LLS	TOT	GIL1651	20150330	GIL1651_IP_TOT_2_tgt2_20150330_OT	LLSPDEVTAVLR	656.8772++	49.4	0.33	1.4	0.8337	663383	1.06506e+06
PDZD7	LLS	TOT	GIL1651	20150330	GIL1651_IP_TOT_3_tgt2_20150330_OT	LLSPDEVTAVLR	656.8772++	49.55	0.3	-0.3	0.7506	553234	888220
PDZD7	LLS	TOT	GIL1651	20150331	GIL1651_IP_TOT1_tgt2_2_20150331_OT	LLSPDEVTAVLR	656.8772++	49.39	0.31	2.2	0.8414	560056	795305
PDZD7	LLS	TOT	GIL1651	20150331	GIL1651_IP_TOT2_tgt2_2_20150331_OT	LLSPDEVTAVLR	656.8772++	49.09	0.31	0.4	0.8401	602567	855673
PDZD7	LLS	TOT	GIL1651	20150331	GIL1651_IP_TOT3_tgt2_2_20150331_OT	LLSPDEVTAVLR	656.8772++	48.74	0.32	0	0.7976	441452	626882
PDZD7	LTL	Heavy	GIL-124	20151008	GIL-124_TOTAL_heavy_pt2_tMS2_25cm_95min_20151008_OT	LTLIQDTAAR	556.3209++ (heavy)	33.34	0.17	-0.8	0.9814	31678560
PDZD7	LTL	CON	GIL1649	20150223	GIL1649_IP_CTRL_Tgt2_20150223_OT	LTLIQDTAAR	551.3168++	#N/A	#N/A	#N/A	0	0	0	CONTROL IP	avg	0	±	0
PDZD7	LTL	CON	GIL1649	20150324	GIL1649_IP_CTRL_2_Tgt2_20150324_OT	LTLIQDTAAR	551.3168++	#N/A	#N/A	#N/A	0	0	0		avg/total	0	±	0
PDZD7	LTL	CON	GIL1651	20150330	GIL1651_CtrlIP_Elut_tgt2_20150330_OT	LTLIQDTAAR	551.3168++	#N/A	#N/A	#N/A	0	0	0				95% CI =	#NUM!
PDZD7	LTL	CON	GIL1651	20150331	GIL1651_CtrlIP_Elut_tgt2_2_20150331_OT	LTLIQDTAAR	551.3168++	#N/A	#N/A	#N/A	0	0	0				SEM=	0
PDZD7	LTL	138-1	GIL1649	20150223	GIL1649_IP_MYO7_Tgt2_20150223_OT	LTLIQDTAAR	551.3168++	25.88	0.28	3.9	0.9816	4938345	2.46634e+06	138-1 IP	avg	3.19948e+06	±	612324	ttest=	4.50315e-05
PDZD7	LTL	138-1	GIL1649	20150324	GIL1649_IP_MYO7_Tgt2_2_20150324_OT	LTLIQDTAAR	551.3168++	29.57	0.34	-0.7	0.9305	2251745	3.02352e+06		avg/total	4.60756	±	0.881804	n=	4
PDZD7	LTL	138-1	GIL1651	20150330	GIL1651_Myo7IP_Elut_tgt2_20150330_OT	LTLIQDTAAR	551.3168++	28.46	0.25	0.1	0.9596	2442568	3.92155e+06				95% CI =	0.864152
PDZD7	LTL	138-1	GIL1651	20150331	GIL1651_Myo7IP_Elut_tgt2_2_20150331_OT	LTLIQDTAAR	551.3168++	28.67	0.31	0.9	0.934	2384789	3.38651e+06				SEM=	0.440902
PDZD7	LTL	TOT	GIL1649	20150331	GIL1649_IP_TOT1_tgt2_20150331_OT	LTLIQDTAAR	551.3168++	28.77	0.3	0.7	0.8477	391150	555451	TOTAL	avg	694399	±	126910
PDZD7	LTL	TOT	GIL1649	20150331	GIL1649_IP_TOT3_tgt2_20150331_OT	LTLIQDTAAR	551.3168++	28.92	0.26	2.1	0.8272	346436	491955
PDZD7	LTL	TOT	GIL1651	20150330	GIL1651_IP_TOT_1_tgt2_20150330_OT	LTLIQDTAAR	551.3168++	29.73	0.28	0.3	0.8126	517769	831280
PDZD7	LTL	TOT	GIL1651	20150330	GIL1651_IP_TOT_2_tgt2_20150330_OT	LTLIQDTAAR	551.3168++	28.77	0.22	2	0.8767	491755	789515
PDZD7	LTL	TOT	GIL1651	20150330	GIL1651_IP_TOT_3_tgt2_20150330_OT	LTLIQDTAAR	551.3168++	28.76	0.28	-0.6	0.8815	478826	768757
PDZD7	LTL	TOT	GIL1651	20150331	GIL1651_IP_TOT1_tgt2_2_20150331_OT	LTLIQDTAAR	551.3168++	28.61	0.25	0.4	0.9136	444914	631798
PDZD7	LTL	TOT	GIL1651	20150331	GIL1651_IP_TOT2_tgt2_2_20150331_OT	LTLIQDTAAR	551.3168++	28.46	0.31	1.7	0.7966	472459	670914
PDZD7	LTL	TOT	GIL1651	20150331	GIL1651_IP_TOT3_tgt2_2_20150331_OT	LTLIQDTAAR	551.3168++	28.31	0.21	-0.5	0.8866	574292	815521

## Sheet: ADGRV1
Protein symbol	Peptide (short)	Type	Experiment	Date	Replicate file name	Peptide sequence	Precursor	Best retention time	Max Fwhm	Average mass error (ppm)	Library dot product	Total area	Area/ MYO7A factor
ADGRV1	SEG	Heavy	GIL-124	20151008	GIL-124_TOTAL_heavy_pt1_tMS2_25cm_95min_20151008_OT	SEGLLTFEPGQR	672.3451++ (heavy)	44.63	0.29	-0.5	0.909	64361540
													0	CONTROL IP
ADGRV1	SEG	CON	GIL1649	20150324	GIL1649_IP_CTRL_2_Tgt2_20150324_OT	SEGLLTFEPGQR	667.3410++	#N/A	#N/A	#N/A	0	0	0		avg/total	0	±	0
ADGRV1	SEG	CON	GIL1651	20150330	GIL1651_CtrlIP_Elut_tgt2_20150330_OT	SEGLLTFEPGQR	667.3410++	#N/A	#N/A	#N/A	0	0	0				95% CI =	#NUM!
ADGRV1	SEG	CON	GIL1651	20150331	GIL1651_CtrlIP_Elut_tgt2_2_20150331_OT	SEGLLTFEPGQR	667.3410++	#N/A	#N/A	#N/A	0	0	0				SEM=	0
ADGRV1	SEG	138-1	GIL1649	20150223	GIL1649_IP_MYO7_Tgt2_20150223_OT	SEGLLTFEPGQR	667.3410++	35.81	0.31	2.7	0.7547	397531	198538	138-1 IP	avg	154962	±	31491.8	ttest=	6.3444e-05
ADGRV1	SEG	138-1	GIL1649	20150324	GIL1649_IP_MYO7_Tgt2_2_20150324_OT	SEGLLTFEPGQR	667.3410++	39.68	0.27	2.1	0.6551	107353	144148		avg/total	0.145455	±	0.0295598	n=	4
ADGRV1	SEG	138-1	GIL1651	20150330	GIL1651_Myo7IP_Elut_tgt2_20150330_OT	SEGLLTFEPGQR	667.3410++	38.63	0.29	-1.9	0.7448	95371	153119				95% CI =	0.028968
ADGRV1	SEG	138-1	GIL1651	20150331	GIL1651_Myo7IP_Elut_tgt2_2_20150331_OT	SEGLLTFEPGQR	667.3410++	38.93	0.31	-0.5	0.5336	87351	124042				SEM=	0.0147799				ALL ERRORS ARE SD
ADGRV1	SEG	TOT	GIL1649	20150331	GIL1649_IP_TOT1_tgt2_20150331_OT	SEGLLTFEPGQR	667.3410++	38.86	0.31	0.5	0.8632	579579	823029	TOTAL	avg	1.06536e+06	±	267313
ADGRV1	SEG	TOT	GIL1649	20150331	GIL1649_IP_TOT3_tgt2_20150331_OT	SEGLLTFEPGQR	667.3410++	39.01	0.32	2.3	0.7847	390989	555222
ADGRV1	SEG	TOT	GIL1651	20150330	GIL1651_IP_TOT_1_tgt2_20150330_OT	SEGLLTFEPGQR	667.3410++	39.84	0.32	0.8	0.8529	643699	1.03346e+06
ADGRV1	SEG	TOT	GIL1651	20150330	GIL1651_IP_TOT_2_tgt2_20150330_OT	SEGLLTFEPGQR	667.3410++	38.85	0.59	-0.8	0.9566	773637	1.24208e+06
ADGRV1	SEG	TOT	GIL1651	20150330	GIL1651_IP_TOT_3_tgt2_20150330_OT	SEGLLTFEPGQR	667.3410++	39.16	0.24	-0.8	0.8804	868045	1.39365e+06
ADGRV1	SEG	TOT	GIL1651	20150331	GIL1651_IP_TOT1_tgt2_2_20150331_OT	SEGLLTFEPGQR	667.3410++	38.85	0.43	2.5	0.8886	868710	1.23361e+06
ADGRV1	SEG	TOT	GIL1651	20150331	GIL1651_IP_TOT2_tgt2_2_20150331_OT	SEGLLTFEPGQR	667.3410++	38.55	0.22	0.9	0.8801	748516	1.06293e+06
ADGRV1	SEG	TOT	GIL1651	20150331	GIL1651_IP_TOT3_tgt2_2_20150331_OT	SEGLLTFEPGQR	667.3410++	38.55	0.35	1.4	0.8917	830196	1.17892e+06
ADGRV1	TFI	Heavy	GIL-124	20151008	GIL-124_TOTAL_heavy_pt1_tMS2_25cm_95min_20151008_OT	TFISPAVAGQDFAR	745.3873++ (heavy)	46.92	0.31	-0.7	0.8702	37870192
ADGRV1	TFI	CON	GIL1649	20150223	GIL1649_IP_CTRL_Tgt2_20150223_OT	TFISPAVAGQDFAR	740.3832++					0	0	CONTROL IP	avg	0	±	0
ADGRV1	TFI	CON	GIL1649	20150324	GIL1649_IP_CTRL_2_Tgt2_20150324_OT	TFISPAVAGQDFAR	740.3832++	#N/A	#N/A	#N/A	0	0	0		avg/total	0	±	0
ADGRV1	TFI	CON	GIL1651	20150330	GIL1651_CtrlIP_Elut_tgt2_20150330_OT	TFISPAVAGQDFAR	740.3832++	#N/A	#N/A	#N/A	0	0	0				95% CI =	#NUM!
ADGRV1	TFI	CON	GIL1651	20150331	GIL1651_CtrlIP_Elut_tgt2_2_20150331_OT	TFISPAVAGQDFAR	740.3832++	#N/A	#N/A	#N/A	0	0	0				SEM=	0
ADGRV1	TFI	138-1	GIL1649	20150223	GIL1649_IP_MYO7_Tgt2_20150223_OT	TFISPAVAGQDFAR	740.3832++	37.78	0.31	2.8	0.7215	282214	140945	138-1 IP	avg	99352.5	±	72176.8	ttest=	0.0331584
ADGRV1	TFI	138-1	GIL1649	20150324	GIL1649_IP_MYO7_Tgt2_2_20150324_OT	TFISPAVAGQDFAR	740.3832++	#N/A	#N/A	#N/A	0	0	0		avg/total	0.083404	±	0.0605907	n=	4
ADGRV1	TFI	138-1	GIL1651	20150330	GIL1651_Myo7IP_Elut_tgt2_20150330_OT	TFISPAVAGQDFAR	740.3832++	40.6	0.31	-4.3	0.5607	101264	162580				95% CI =	0.0593778
ADGRV1	TFI	138-1	GIL1651	20150331	GIL1651_Myo7IP_Elut_tgt2_2_20150331_OT	TFISPAVAGQDFAR	740.3832++	40.75	0.31	2.7	0.5593	66114	93884.9				SEM=	0.0302953
ADGRV1	TFI	TOT	GIL1649	20150331	GIL1649_IP_TOT1_tgt2_20150331_OT	TFISPAVAGQDFAR	740.3832++	40.83	0.33	0.3	0.7769	410213	582521	TOTAL	avg	1.19122e+06	±	371234
ADGRV1	TFI	TOT	GIL1649	20150331	GIL1649_IP_TOT3_tgt2_20150331_OT	TFISPAVAGQDFAR	740.3832++	40.98	0.35	2.3	0.8971	556077	789655
ADGRV1	TFI	TOT	GIL1651	20150330	GIL1651_IP_TOT_1_tgt2_20150330_OT	TFISPAVAGQDFAR	740.3832++	41.82	0.42	-3	0.7776	881448	1.41517e+06
ADGRV1	TFI	TOT	GIL1651	20150330	GIL1651_IP_TOT_2_tgt2_20150330_OT	TFISPAVAGQDFAR	740.3832++	40.82	0.47	-0.2	0.7948	921631	1.47968e+06
ADGRV1	TFI	TOT	GIL1651	20150330	GIL1651_IP_TOT_3_tgt2_20150330_OT	TFISPAVAGQDFAR	740.3832++	41.13	0.55	-3.1	0.8412	854172	1.37138e+06
ADGRV1	TFI	TOT	GIL1651	20150331	GIL1651_IP_TOT1_tgt2_2_20150331_OT	TFISPAVAGQDFAR	740.3832++	40.82	0.54	-1.2	0.8156	1096544	1.55714e+06
ADGRV1	TFI	TOT	GIL1651	20150331	GIL1651_IP_TOT2_tgt2_2_20150331_OT	TFISPAVAGQDFAR	740.3832++	40.52	0.31	-1.4	0.7815	640930	910150
ADGRV1	TFI	TOT	GIL1651	20150331	GIL1651_IP_TOT3_tgt2_2_20150331_OT	TFISPAVAGQDFAR	740.3832++	40.37	0.71	-1.2	0.8721	1002824	1.42406e+06
ADGRV1	VTL	Heavy	GIL-124	20151008	GIL-124_TOTAL_heavy_pt1_tMS2_25cm_95min_20151008_OT	VTLVSAVSGDGK	570.8212++ (heavy)	32.18	0.25	-0.4	0.7844	17796572
ADGRV1	VTL	CON	GIL1649	20150223	GIL1649_IP_CTRL_Tgt2_20150223_OT	VTLVSAVSGDGK	566.8141++	#N/A	#N/A	#N/A	0	0	0	CONTROL IP	avg	0	±	0
ADGRV1	VTL	CON	GIL1649	20150324	GIL1649_IP_CTRL_2_Tgt2_20150324_OT	VTLVSAVSGDGK	566.8141++	#N/A	#N/A	#N/A	0	0	0		avg/total		±
ADGRV1	VTL	CON	GIL1651	20150330	GIL1651_CtrlIP_Elut_tgt2_20150330_OT	VTLVSAVSGDGK	566.8141++	#N/A	#N/A	#N/A	0	0	0				95% CI =	#VALUE!
ADGRV1	VTL	CON	GIL1651	20150331	GIL1651_CtrlIP_Elut_tgt2_2_20150331_OT	VTLVSAVSGDGK	566.8141++	#N/A	#N/A	#N/A	0	0	0				SEM=	#VALUE!
ADGRV1	VTL	138-1	GIL1649	20150223	GIL1649_IP_MYO7_Tgt2_20150223_OT	VTLVSAVSGDGK	566.8141++	#N/A	#N/A	#N/A	0	0	0	138-1 IP	avg	0	±	0	ttest=	#DIV/0!
ADGRV1	VTL	138-1	GIL1649	20150324	GIL1649_IP_MYO7_Tgt2_2_20150324_OT	VTLVSAVSGDGK	566.8141++	#N/A	#N/A	#N/A	0	0	0		avg/total	0	±	0	n=	4
ADGRV1	VTL	138-1	GIL1651	20150330	GIL1651_Myo7IP_Elut_tgt2_20150330_OT	VTLVSAVSGDGK	566.8141++	#N/A	#N/A	#N/A	0	0	0				95% CI =	#NUM!
ADGRV1	VTL	138-1	GIL1651	20150331	GIL1651_Myo7IP_Elut_tgt2_2_20150331_OT	VTLVSAVSGDGK	566.8141++	#N/A	#N/A	#N/A	0	0	0				SEM=	0
ADGRV1	VTL	TOT	GIL1649	20150331	GIL1649_IP_TOT1_tgt2_20150331_OT	VTLVSAVSGDGK	566.8141++	27.62	0.32	0.8	0.792	233524	331615	TOTAL	avg	591082	±	193507
ADGRV1	VTL	TOT	GIL1649	20150331	GIL1649_IP_TOT3_tgt2_20150331_OT	VTLVSAVSGDGK	566.8141++	27.77	0.29	-1.4	0.8202	266602	378587
ADGRV1	VTL	TOT	GIL1651	20150330	GIL1651_IP_TOT_1_tgt2_20150330_OT	VTLVSAVSGDGK	566.8141++	28.43	0.35	3	0.9203	304271	488508
ADGRV1	VTL	TOT	GIL1651	20150330	GIL1651_IP_TOT_2_tgt2_20150330_OT	VTLVSAVSGDGK	566.8141++	27.62	0.34	0.5	0.8971	490386	787317
ADGRV1	VTL	TOT	GIL1651	20150330	GIL1651_IP_TOT_3_tgt2_20150330_OT	VTLVSAVSGDGK	566.8141++	27.62	0.33	-1	0.8472	478569	768345
ADGRV1	VTL	TOT	GIL1651	20150331	GIL1651_IP_TOT1_tgt2_2_20150331_OT	VTLVSAVSGDGK	566.8141++	27.47	0.33	2	0.7973	384442	545925
ADGRV1	VTL	TOT	GIL1651	20150331	GIL1651_IP_TOT2_tgt2_2_20150331_OT	VTLVSAVSGDGK	566.8141++	27.32	0.34	-1	0.9687	407350	578456
ADGRV1	VTL	TOT	GIL1651	20150331	GIL1651_IP_TOT3_tgt2_2_20150331_OT	VTLVSAVSGDGK	566.8141++	27.22	0.29	-0.8	0.7779	598501	849899

## Sheet: USH1C
Protein symbol	Peptide (short)	Type	Experiment	Date	Replicate file name	Peptide sequence	Precursor	Best retention time	Max Fwhm	Average mass error (ppm)	Library dot product	Total area	Area/ MYO7A factor
USH1C	LHP	Heavy	GIL-124	20151008	GIL-124_TOTAL_heavy_pt2_tMS2_25cm_95min_20151008_OT	LHPEGLGISVR	396.5639+++ (heavy)	31.27	0.27	-1.2	#N/A	13176175
USH1C	LHP	CON	GIL1649	20150223	GIL1649_IP_CTRL_Tgt2_20150223_OT	LHPEGLGISVR	393.2278+++	#N/A	#N/A	#N/A	#N/A	0	0	CONTROL IP	avg	0	±	0
USH1C	LHP	CON	GIL1649	20150324	GIL1649_IP_CTRL_2_Tgt2_20150324_OT	LHPEGLGISVR	393.2278+++	#N/A	#N/A	#N/A	#N/A	0	0		avg/total	0	±	0
USH1C	LHP	CON	GIL1651	20150330	GIL1651_CtrlIP_Elut_tgt2_20150330_OT	LHPEGLGISVR	393.2278+++	#N/A	#N/A	#N/A	#N/A	0	0				95% CI =	#NUM!
USH1C	LHP	CON	GIL1651	20150331	GIL1651_CtrlIP_Elut_tgt2_2_20150331_OT	LHPEGLGISVR	393.2278+++	#N/A	#N/A	#N/A	#N/A	0	0				SEM=	0
USH1C	LHP	CON	GIL-185	20160226	GILL-185_CtrlIP_RIPA_100ear_inj1_tgt2_95min_20160226_OT	LHPEGLGISVR	393.2278+++	27.95	#N/A	-1.8	#N/A	0	0
USH1C	LHP	CON	GIL-185	20160226	GILL-185_CtrlIP_RIPA_100ear_inj2_tgt2_95min_20160226_OT	LHPEGLGISVR	393.2278+++	27.47	#N/A	#N/A	#N/A	0	0
USH1C	LHP	138-1	GIL1649	20150223	GIL1649_IP_MYO7_Tgt2_20150223_OT	LHPEGLGISVR	393.2278+++	23.94	0.34	3.8	#N/A	1375162	686793	138-1 IP	avg	591487	±	135089	ttest=	8.33834e-07
USH1C	LHP	138-1	GIL1649	20150324	GIL1649_IP_MYO7_Tgt2_2_20150324_OT	LHPEGLGISVR	393.2278+++	27.79	0.36	-1.3	#N/A	560590	752731		avg/total	5.30619	±	1.21188	n=	6
USH1C	LHP	138-1	GIL1651	20150330	GIL1651_Myo7IP_Elut_tgt2_20150330_OT	LHPEGLGISVR	393.2278+++	27.04	0.4	0.8	#N/A	353750	567947				95% CI =	0.969684
USH1C	LHP	138-1	GIL1651	20150331	GIL1651_Myo7IP_Elut_tgt2_2_20150331_OT	LHPEGLGISVR	393.2278+++	27.34	0.44	3.5	#N/A	401875	570681				SEM=	0.494746
USH1C	LHP	138-1	GIL-185	20160226	GILL-185_Myo7IP_RIPA_100ear_inj1_tgt2_95min_20160226_OT	LHPEGLGISVR	393.2278+++	27.63	0.33	-1.3	#N/A	501945	357595
USH1C	LHP	138-1	GIL-185	20160226	GILL-185_Myo7IP_RIPA_100ear_inj2_tgt2_95min_20160226_OT	LHPEGLGISVR	393.2278+++	26.68	0.18	1.6	#N/A	860691	613173
USH1C	LHP	TOT	GIL1649	20150331	GIL1649_IP_TOT1_tgt2_20150331_OT	LHPEGLGISVR	393.2278+++	#N/A	#N/A	#N/A	#N/A	0	0	TOTAL	avg	111471	±	74506
USH1C	LHP	TOT	GIL1649	20150331	GIL1649_IP_TOT3_tgt2_20150331_OT	LHPEGLGISVR	393.2278+++	27.44	0.22	2.5	#N/A	42222	59957.2
USH1C	LHP	TOT	GIL1651	20150330	GIL1651_IP_TOT_1_tgt2_20150330_OT	LHPEGLGISVR	393.2278+++	28.1	0.29	-1.3	#N/A	83437	133958
USH1C	LHP	TOT	GIL1651	20150330	GIL1651_IP_TOT_2_tgt2_20150330_OT	LHPEGLGISVR	393.2278+++	27.13	0.23	-1.1	#N/A	70003	112390
USH1C	LHP	TOT	GIL1651	20150330	GIL1651_IP_TOT_3_tgt2_20150330_OT	LHPEGLGISVR	393.2278+++	27.28	0.3	-0.9	#N/A	59084	94859.6
USH1C	LHP	TOT	GIL1651	20150331	GIL1651_IP_TOT1_tgt2_2_20150331_OT	LHPEGLGISVR	393.2278+++	26.98	0.27	3.2	#N/A	76946	109267
USH1C	LHP	TOT	GIL1651	20150331	GIL1651_IP_TOT2_tgt2_2_20150331_OT	LHPEGLGISVR	393.2278+++	27.13	0.28	-0.1	#N/A	49702	70579.1
USH1C	LHP	TOT	GIL1651	20150331	GIL1651_IP_TOT3_tgt2_2_20150331_OT	LHPEGLGISVR	393.2278+++	26.83	0.32	-1.4	#N/A	51263	72795.8
USH1C	LHP	TOT	GIL-185	20160226	GILL-185_TOT_RIPA_4ear_inj1_tgt2_95min_20160226_OT	LHPEGLGISVR	393.2278+++	26.68	0.21	-1.1	#N/A	272745	194309
USH1C	LHP	TOT	GIL-185	20160226	GILL-185_TOT_RIPA_4ear_inj2_tgt2_95min_20160226_OT	LHPEGLGISVR	393.2278+++	27	0.27	0.3	#N/A	374211	266595
USH1C	TLT	Heavy	GIL-124	20151008	GIL-124_TOTAL_heavy_pt2_tMS2_25cm_95min_20151008_OT	TLTISVVAGAGK	562.8419++ (heavy)	39.4	0.71	-0.3	0.9826	3931149
USH1C	TLT	CON	GIL1649	20150223	GIL1649_IP_CTRL_Tgt2_20150223_OT	TLTISVVAGAGK	558.8348++	#N/A	#N/A	#N/A	0	0	0	CONTROL IP	avg	0	±	0
USH1C	TLT	CON	GIL1649	20150324	GIL1649_IP_CTRL_2_Tgt2_20150324_OT	TLTISVVAGAGK	558.8348++	#N/A	#N/A	#N/A	0	0	0		avg/total	0	±	0
USH1C	TLT	CON	GIL1651	20150330	GIL1651_CtrlIP_Elut_tgt2_20150330_OT	TLTISVVAGAGK	558.8348++	#N/A	#N/A	#N/A	0	0	0				95% CI =	#NUM!
USH1C	TLT	CON	GIL1651	20150331	GIL1651_CtrlIP_Elut_tgt2_2_20150331_OT	TLTISVVAGAGK	558.8348++	#N/A	#N/A	#N/A	0	0	0				SEM=	0
USH1C	TLT	CON	GIL-185	20160226	GILL-185_CtrlIP_RIPA_100ear_inj1_tgt2_95min_20160226_OT	TLTISVVAGAGK	558.8348++	#N/A	#N/A	#N/A	#N/A	0	0
USH1C	TLT	CON	GIL-185	20160226	GILL-185_CtrlIP_RIPA_100ear_inj2_tgt2_95min_20160226_OT	TLTISVVAGAGK	558.8348++	#N/A	#N/A	#N/A	#N/A	0	0
USH1C	TLT	138-1	GIL1649	20150223	GIL1649_IP_MYO7_Tgt2_20150223_OT	TLTISVVAGAGK	558.8348++	30.78	0.32	4	0.9708	1227618	613106	138-1 IP	avg	465366	±	465881	ttest=	0.034447
USH1C	TLT	138-1	GIL1649	20150324	GIL1649_IP_MYO7_Tgt2_2_20150324_OT	TLTISVVAGAGK	558.8348++	34.63	0.33	-0.4	0.7257	158503	212829		avg/total	5.42834	±	5.43435	n=	6
USH1C	TLT	138-1	GIL1651	20150330	GIL1651_Myo7IP_Elut_tgt2_20150330_OT	TLTISVVAGAGK	558.8348++	#N/A	#N/A	#N/A	0	0	0				95% CI =	4.3483
USH1C	TLT	138-1	GIL1651	20150331	GIL1651_Myo7IP_Elut_tgt2_2_20150331_OT	TLTISVVAGAGK	558.8348++	#N/A	#N/A	#N/A	0	0	0				SEM=	2.21856
USH1C	TLT	138-1	GIL-185	20160226	GILL-185_Myo7IP_RIPA_100ear_inj1_tgt2_95min_20160226_OT	TLTISVVAGAGK	558.8348++	34.93	0.54	2.8	#N/A	1207121	859977
USH1C	TLT	138-1	GIL-185	20160226	GILL-185_Myo7IP_RIPA_100ear_inj2_tgt2_95min_20160226_OT	TLTISVVAGAGK	558.8348++	34.14	0.77	3.7	#N/A	1552853	1.10628e+06
USH1C	TLT	TOT	GIL1649	20150331	GIL1649_IP_TOT1_tgt2_20150331_OT	TLTISVVAGAGK	558.8348++	33.82	0.26	5.5	0.3986	68003	96567.4	TOTAL	avg	85728.9	±	72856.2
USH1C	TLT	TOT	GIL1649	20150331	GIL1649_IP_TOT3_tgt2_20150331_OT	TLTISVVAGAGK	558.8348++	33.97	0.23	10.7	0.2512	79885	113440
USH1C	TLT	TOT	GIL1651	20150330	GIL1651_IP_TOT_1_tgt2_20150330_OT	TLTISVVAGAGK	558.8348++	#N/A	#N/A	#N/A	0	0	0
USH1C	TLT	TOT	GIL1651	20150330	GIL1651_IP_TOT_2_tgt2_20150330_OT	TLTISVVAGAGK	558.8348++	#N/A	#N/A	#N/A	0	0	0
USH1C	TLT	TOT	GIL1651	20150330	GIL1651_IP_TOT_3_tgt2_20150330_OT	TLTISVVAGAGK	558.8348++	34.12	0.27	2.1	0.2608	53943	86605.7
USH1C	TLT	TOT	GIL1651	20150331	GIL1651_IP_TOT1_tgt2_2_20150331_OT	TLTISVVAGAGK	558.8348++	#N/A	#N/A	#N/A	0	0	0
USH1C	TLT	TOT	GIL1651	20150331	GIL1651_IP_TOT2_tgt2_2_20150331_OT	TLTISVVAGAGK	558.8348++	33.51	0.28	3	0.2629	53032	75307.9
USH1C	TLT	TOT	GIL1651	20150331	GIL1651_IP_TOT3_tgt2_2_20150331_OT	TLTISVVAGAGK	558.8348++	33.21	0.3	10.3	0.2584	66169	93963
USH1C	TLT	TOT	GIL-185	20160226	GILL-185_TOT_RIPA_4ear_inj1_tgt2_95min_20160226_OT	TLTISVVAGAGK	558.8348++	33.9	0.27	-1.5	#N/A	296288	211081
USH1C	TLT	TOT	GIL-185	20160226	GILL-185_TOT_RIPA_4ear_inj2_tgt2_95min_20160226_OT	TLTISVVAGAGK	558.8348++	34.06	0.31	-6	#N/A	253114	180323
USH1C	YVE	Heavy	GIL-124	20151008	GIL-124_TOTAL_heavy_pt2_tMS2_25cm_95min_20151008_OT	YVEDFDPHSMFTPEQIVGK	749.6888+++ (heavy)	57.22	#N/A	-1.3	#N/A	97129	97129
USH1C	YVE	CON	GIL1649	20150223	GIL1649_IP_CTRL_Tgt2_20150223_OT	YVEDFDPHSMFTPEQIVGK	747.0174+++	#N/A	#N/A	#N/A	#N/A	0	0	CONTROL IP	avg	0	±	0
USH1C	YVE	CON	GIL1649	20150324	GIL1649_IP_CTRL_2_Tgt2_20150324_OT	YVEDFDPHSMFTPEQIVGK	747.0174+++	#N/A	#N/A	#N/A	#N/A	0	0		avg/total	0	±	0
USH1C	YVE	CON	GIL1651	20150330	GIL1651_CtrlIP_Elut_tgt2_20150330_OT	YVEDFDPHSMFTPEQIVGK	747.0174+++	#N/A	#N/A	#N/A	#N/A	0	0				95% CI =	#NUM!
USH1C	YVE	CON	GIL1651	20150331	GIL1651_CtrlIP_Elut_tgt2_2_20150331_OT	YVEDFDPHSMFTPEQIVGK	747.0174+++	#N/A	#N/A	#N/A	#N/A	0	0				SEM=	0
USH1C	YVE	CON	GIL-185	20160226	GILL-185_CtrlIP_RIPA_100ear_inj1_tgt2_95min_20160226_OT	YVEDFDPHSMFTPEQIVGK	747.0174+++	#N/A	#N/A	#N/A	#N/A		0
USH1C	YVE	CON	GIL-185	20160226	GILL-185_CtrlIP_RIPA_100ear_inj2_tgt2_95min_20160226_OT	YVEDFDPHSMFTPEQIVGK	747.0174+++	#N/A	#N/A	#N/A	#N/A		0
USH1C	YVE	138-1	GIL1649	20150223	GIL1649_IP_MYO7_Tgt2_20150223_OT	YVEDFDPHSMFTPEQIVGK	747.0174+++	47.62	0.34	3.1	#N/A	148861	74345.2	138-1 IP	avg	66810.6	±	112278	ttest=	0.175637
USH1C	YVE	138-1	GIL1649	20150324	GIL1649_IP_MYO7_Tgt2_2_20150324_OT	YVEDFDPHSMFTPEQIVGK	747.0174+++	51.05	0.17	5.2	#N/A	28898	38802.7		avg/total	4.3171	±	7.25503	n=	6
USH1C	YVE	138-1	GIL1651	20150330	GIL1651_Myo7IP_Elut_tgt2_20150330_OT	YVEDFDPHSMFTPEQIVGK	747.0174+++	#N/A	#N/A	#N/A	#N/A	0	0				95% CI =	5.80513
USH1C	YVE	138-1	GIL1651	20150331	GIL1651_Myo7IP_Elut_tgt2_2_20150331_OT	YVEDFDPHSMFTPEQIVGK	747.0174+++	#N/A	#N/A	#N/A	#N/A	0	0				SEM=	2.96185
USH1C	YVE	138-1	GIL-185	20160226	GILL-185_Myo7IP_RIPA_100ear_inj1_tgt2_95min_20160226_OT	YVEDFDPHSMFTPEQIVGK	747.0174+++	50.32	#N/A	#N/A	#N/A	403857	287716
USH1C	YVE	138-1	GIL-185	20160226	GILL-185_Myo7IP_RIPA_100ear_inj2_tgt2_95min_20160226_OT	YVEDFDPHSMFTPEQIVGK	747.0174+++	49.69	#N/A	#N/A	#N/A	0	0
USH1C	YVE	TOT	GIL1649	20150331	GIL1649_IP_TOT1_tgt2_20150331_OT	YVEDFDPHSMFTPEQIVGK	747.0174+++	#N/A	#N/A	#N/A	#N/A	0	0	TOTAL	avg	15475.8	±	35441.9
USH1C	YVE	TOT	GIL1649	20150331	GIL1649_IP_TOT3_tgt2_20150331_OT	YVEDFDPHSMFTPEQIVGK	747.0174+++	#N/A	#N/A	#N/A	#N/A	0	0
USH1C	YVE	TOT	GIL1651	20150330	GIL1651_IP_TOT_1_tgt2_20150330_OT	YVEDFDPHSMFTPEQIVGK	747.0174+++	#N/A	#N/A	#N/A	#N/A	0	0
USH1C	YVE	TOT	GIL1651	20150330	GIL1651_IP_TOT_2_tgt2_20150330_OT	YVEDFDPHSMFTPEQIVGK	747.0174+++	#N/A	#N/A	#N/A	#N/A	0	0
USH1C	YVE	TOT	GIL1651	20150330	GIL1651_IP_TOT_3_tgt2_20150330_OT	YVEDFDPHSMFTPEQIVGK	747.0174+++	#N/A	#N/A	#N/A	#N/A	0	0
USH1C	YVE	TOT	GIL1651	20150331	GIL1651_IP_TOT1_tgt2_2_20150331_OT	YVEDFDPHSMFTPEQIVGK	747.0174+++	#N/A	#N/A	#N/A	#N/A	0	0
USH1C	YVE	TOT	GIL1651	20150331	GIL1651_IP_TOT2_tgt2_2_20150331_OT	YVEDFDPHSMFTPEQIVGK	747.0174+++	#N/A	#N/A	#N/A	#N/A	0	0
USH1C	YVE	TOT	GIL1651	20150331	GIL1651_IP_TOT3_tgt2_2_20150331_OT	YVEDFDPHSMFTPEQIVGK	747.0174+++	#N/A	#N/A	#N/A	#N/A	0	0
USH1C	YVE	TOT	GIL-185	20160226	GILL-185_TOT_RIPA_4ear_inj1_tgt2_95min_20160226_OT	YVEDFDPHSMFTPEQIVGK	747.0174+++	49.85	0.23	3.8	#N/A	67390	48010
USH1C	YVE	TOT	GIL-185	20160226	GILL-185_TOT_RIPA_4ear_inj2_tgt2_95min_20160226_OT	YVEDFDPHSMFTPEQIVGK	747.0174+++	50.09	0.29	2.8	#N/A	149839	106748

## Sheet: USH1G
Protein symbol	Peptide (short)	Type	Experiment	Date	Replicate file name	Peptide sequence	Precursor	Best retention time	Max Fwhm	Average mass error (ppm)	Library dot product	Total area	Area/ MYO7A factor
USH1G	DMF	Heavy	GIL-124	20151008	GIL-124_TOTAL_heavy_pt2_tMS2_25cm_95min_20151008_OT	DMFLTDEDTVSR	719.8233++ (heavy)	46.48	0.3	-1.6	0.9699	5283528
USH1G	DMF	CON	GIL1649	20150223	GIL1649_IP_CTRL_Tgt2_20150223_OT	DMFLTDEDTVSR	714.8192++	#N/A	#N/A	#N/A	0	0	0	CONTROL IP	avg	9020.84	±	22096.5
USH1G	DMF	CON	GIL1649	20150324	GIL1649_IP_CTRL_2_Tgt2_20150324_OT	DMFLTDEDTVSR	714.8192++	#N/A	#N/A	#N/A	0	0	0		avg/total	0.109253	±	0.267613
USH1G	DMF	CON	GIL1651	20150330	GIL1651_CtrlIP_Elut_tgt2_20150330_OT	DMFLTDEDTVSR	714.8192++	#N/A	#N/A	#N/A	0	0	0				95% CI =	0.214131
USH1G	DMF	CON	GIL1651	20150331	GIL1651_CtrlIP_Elut_tgt2_2_20150331_OT	DMFLTDEDTVSR	714.8192++	37.47	0.29	6.5	0.5228	38115	54125.1				SEM=	0.109253
USH1G	DMF	CON	GILL-186	20160226	GILL-185_CtrlIP_RIPA_100ear_inj1_tgt2_95min_20160226_OT	DMFLTDEDTVSR	714.8192++	#N/A	#N/A	#N/A	#N/A	0	0
USH1G	DMF	CON	GILL-186	20160226	GILL-185_CtrlIP_RIPA_100ear_inj2_tgt2_95min_20160226_OT	DMFLTDEDTVSR	714.8192++	#N/A	#N/A	#N/A	#N/A	0	0
USH1G	DMF	138-1	GIL1649	20150223	GIL1649_IP_MYO7_Tgt2_20150223_OT	DMFLTDEDTVSR	714.8192++	37.01	0.31	2.5	0.79	285172	142423	138-1 IP	avg	82568.7	±	61904.2	ttest=	0.0208025
USH1G	DMF	138-1	GIL1649	20150324	GIL1649_IP_MYO7_Tgt2_2_20150324_OT	DMFLTDEDTVSR	714.8192++	#N/A	#N/A	#N/A	0	0	0		avg/total	3.59841	±	2.69784	n=	6
USH1G	DMF	138-1	GIL1651	20150330	GIL1651_Myo7IP_Elut_tgt2_20150330_OT	DMFLTDEDTVSR	714.8192++	39.74	0.19	0.3	0.6677	81803	131335				95% CI =	2.15868
USH1G	DMF	138-1	GIL1651	20150331	GIL1651_Myo7IP_Elut_tgt2_2_20150331_OT	DMFLTDEDTVSR	714.8192++	39.97	0.29	-1.5	0.5974	97143	137948				SEM=	1.10139
USH1G	DMF	138-1	GILL-186	20160226	GILL-185_Myo7IP_RIPA_100ear_inj1_tgt2_95min_20160226_OT	DMFLTDEDTVSR	714.8192++	40.33	0.19	-1.2	#N/A	58346	41566.8
USH1G	DMF	138-1	GILL-186	20160226	GILL-185_Myo7IP_RIPA_100ear_inj2_tgt2_95min_20160226_OT	DMFLTDEDTVSR	714.8192++	39.38	0.2	-3.2	#N/A	59151	42140.3
USH1G	DMF	TOT	GIL1649	20150331	GIL1649_IP_TOT1_tgt2_20150331_OT	DMFLTDEDTVSR	714.8192++	#N/A	#N/A	#N/A	0	0	0	TOTAL	avg	22945.9	±	48502.6
USH1G	DMF	TOT	GIL1649	20150331	GIL1649_IP_TOT3_tgt2_20150331_OT	DMFLTDEDTVSR	714.8192++	#N/A	#N/A	#N/A	0	0	0
USH1G	DMF	TOT	GIL1651	20150330	GIL1651_IP_TOT_1_tgt2_20150330_OT	DMFLTDEDTVSR	714.8192++	38.6	0.31	10.6	0.493	76121	122213
USH1G	DMF	TOT	GIL1651	20150330	GIL1651_IP_TOT_2_tgt2_20150330_OT	DMFLTDEDTVSR	714.8192++	38.38	0.22	5.5	0.5604	66799	107246
USH1G	DMF	TOT	GIL1651	20150330	GIL1651_IP_TOT_3_tgt2_20150330_OT	DMFLTDEDTVSR	714.8192++	#N/A	#N/A	#N/A	0	0	0
USH1G	DMF	TOT	GIL1651	20150331	GIL1651_IP_TOT1_tgt2_2_20150331_OT	DMFLTDEDTVSR	714.8192++	#N/A	#N/A	#N/A	0	0	0
USH1G	DMF	TOT	GIL1651	20150331	GIL1651_IP_TOT2_tgt2_2_20150331_OT	DMFLTDEDTVSR	714.8192++	#N/A	#N/A	#N/A	0	0	0
USH1G	DMF	TOT	GIL1651	20150331	GIL1651_IP_TOT3_tgt2_2_20150331_OT	DMFLTDEDTVSR	714.8192++	#N/A	#N/A	#N/A	0	0	0
USH1G	DMF	TOT	GILL-186	20160226	GILL-185_TOT_RIPA_4ear_inj1_tgt2_95min_20160226_OT	DMFLTDEDTVSR	714.8192++	#N/A	#N/A	#N/A	#N/A	0	0
USH1G	DMF	TOT	GILL-186	20160226	GILL-185_TOT_RIPA_4ear_inj2_tgt2_95min_20160226_OT	DMFLTDEDTVSR	714.8192++	#N/A	#N/A	#N/A	#N/A	0	0
USH1G	EDA	Heavy	GIL-124	20151008	GIL-124_TOTAL_heavy_pt2_tMS2_25cm_95min_20151008_OT	EDAGVLGEGNADGAGLK	790.8857++ (heavy)	34.44	0.14	-0.7	0.9527	900375
USH1G	EDA	CON	GIL1649	20150223	GIL1649_IP_CTRL_Tgt2_20150223_OT	EDAGVLGEGNADGAGLK	786.8786++	#N/A	#N/A	#N/A	0	0	0	CONTROL IP	avg	6187.96	±	10178.5
USH1G	EDA	CON	GIL1649	20150324	GIL1649_IP_CTRL_2_Tgt2_20150324_OT	EDAGVLGEGNADGAGLK	786.8786++	#N/A	#N/A	#N/A	0	0	0		avg/total	0.0413637	±	0.0680384
USH1G	EDA	CON	GIL1651	20150330	GIL1651_CtrlIP_Elut_tgt2_20150330_OT	EDAGVLGEGNADGAGLK	786.8786++	#N/A	#N/A	#N/A	0	0	0				95% CI =	0.0544411
USH1G	EDA	CON	GIL1651	20150331	GIL1651_CtrlIP_Elut_tgt2_2_20150331_OT	EDAGVLGEGNADGAGLK	786.8786++	#N/A	#N/A	#N/A	0	0	0				SEM=	0.0277766
USH1G	EDA	CON	GILL-186	20160226	GILL-185_CtrlIP_RIPA_100ear_inj1_tgt2_95min_20160226_OT	EDAGVLGEGNADGAGLK	786.8786++	29.87	#N/A	1.4	#N/A	18465	13154.8
USH1G	EDA	CON	GILL-186	20160226	GILL-185_CtrlIP_RIPA_100ear_inj2_tgt2_95min_20160226_OT	EDAGVLGEGNADGAGLK	786.8786++	28.92	0.29	-1.6	#N/A	33650	23972.9
USH1G	EDA	138-1	GIL1649	20150223	GIL1649_IP_MYO7_Tgt2_20150223_OT	EDAGVLGEGNADGAGLK	786.8786++	26.09	0.32	2.8	0.5876	230561	115148	138-1 IP	avg	149599	±	27788.3	ttest=	3.23583e-07
USH1G	EDA	138-1	GIL1649	20150324	GIL1649_IP_MYO7_Tgt2_2_20150324_OT	EDAGVLGEGNADGAGLK	786.8786++	30.09	0.17	0.5	0.6571	130494	175220		avg/total	10.9048	±	2.02559	n=	6
USH1G	EDA	138-1	GIL1651	20150330	GIL1651_Myo7IP_Elut_tgt2_20150330_OT	EDAGVLGEGNADGAGLK	786.8786++	28.73	0.27	-1.1	0.6197	107981	173364				95% CI =	1.62078
USH1G	EDA	138-1	GIL1651	20150331	GIL1651_Myo7IP_Elut_tgt2_2_20150331_OT	EDAGVLGEGNADGAGLK	786.8786++	28.88	0.32	-0.1	0.5781	112868	160278				SEM=	0.826942
USH1G	EDA	138-1	GILL-186	20160226	GILL-185_CtrlIP_RIPA_100ear_inj1_tgt2_95min_20160226_OT	EDAGVLGEGNADGAGLK	786.8786++	29.72	0.31	-1.5	#N/A	223564	159271
USH1G	EDA	138-1	GILL-186	20160226	GILL-185_CtrlIP_RIPA_100ear_inj2_tgt2_95min_20160226_OT	EDAGVLGEGNADGAGLK	786.8786++	28.61	0.31	-3.2	#N/A	160454	114311
USH1G	EDA	TOT	GIL1649	20150331	GIL1649_IP_TOT1_tgt2_20150331_OT	EDAGVLGEGNADGAGLK	786.8786++	#N/A	#N/A	#N/A	0	0	0	TOTAL	avg	13718.6	±	29985.6
USH1G	EDA	TOT	GIL1649	20150331	GIL1649_IP_TOT3_tgt2_20150331_OT	EDAGVLGEGNADGAGLK	786.8786++	#N/A	#N/A	#N/A	0	0	0
USH1G	EDA	TOT	GIL1651	20150330	GIL1651_IP_TOT_1_tgt2_20150330_OT	EDAGVLGEGNADGAGLK	786.8786++	#N/A	#N/A	#N/A	0	0	0
USH1G	EDA	TOT	GIL1651	20150330	GIL1651_IP_TOT_2_tgt2_20150330_OT	EDAGVLGEGNADGAGLK	786.8786++	#N/A	#N/A	#N/A	0	0	0
USH1G	EDA	TOT	GIL1651	20150330	GIL1651_IP_TOT_3_tgt2_20150330_OT	EDAGVLGEGNADGAGLK	786.8786++	#N/A	#N/A	#N/A	0	0	0
USH1G	EDA	TOT	GIL1651	20150331	GIL1651_IP_TOT1_tgt2_2_20150331_OT	EDAGVLGEGNADGAGLK	786.8786++	#N/A	#N/A	#N/A	0	0	0
USH1G	EDA	TOT	GIL1651	20150331	GIL1651_IP_TOT2_tgt2_2_20150331_OT	EDAGVLGEGNADGAGLK	786.8786++	#N/A	#N/A	#N/A	0	0	0
USH1G	EDA	TOT	GIL1651	20150331	GIL1651_IP_TOT3_tgt2_2_20150331_OT	EDAGVLGEGNADGAGLK	786.8786++	#N/A	#N/A	#N/A	0	0	0
USH1G	EDA	TOT	GILL-186	20160226	GILL-185_TOT_RIPA_4ear_inj1_tgt2_95min_20160226_OT	EDAGVLGEGNADGAGLK	786.8786++	28.76	0.31	-2.2	#N/A	72707	51797.9
USH1G	EDA	TOT	GILL-186	20160226	GILL-185_TOT_RIPA_4ear_inj2_tgt2_95min_20160226_OT	EDAGVLGEGNADGAGLK	786.8786++	28.93	0.26	-1.5	#N/A	119857	85388.5
USH1G	NYV	Heavy	GIL-124	20151008	GIL-124_TOTAL_heavy_pt2_tMS2_25cm_95min_20151008_OT	NYVSSGLFGIGR	640.3371++ (heavy)	51.07	#N/A	0.9	0.765	104255
USH1G	NYV	CON	GIL1649	20150223	GIL1649_IP_CTRL_Tgt2_20150223_OT	NYVSSGLFGIGR	635.3329++	#N/A	#N/A	#N/A	0	0	0	CONTROL IP	avg	0	±	0
USH1G	NYV	CON	GIL1649	20150324	GIL1649_IP_CTRL_2_Tgt2_20150324_OT	NYVSSGLFGIGR	635.3329++	#N/A	#N/A	#N/A	0	0	0		avg/total	0	±	0
USH1G	NYV	CON	GIL1651	20150330	GIL1651_CtrlIP_Elut_tgt2_20150330_OT	NYVSSGLFGIGR	635.3329++	#N/A	#N/A	#N/A	0	0	0				95% CI =	#NUM!
USH1G	NYV	CON	GIL1651	20150331	GIL1651_CtrlIP_Elut_tgt2_2_20150331_OT	NYVSSGLFGIGR	635.3329++	#N/A	#N/A	#N/A	0	0	0				SEM=	0
USH1G	NYV	CON	GILL-186	20160226	GILL-185_CtrlIP_RIPA_100ear_inj1_tgt2_95min_20160226_OT	NYVSSGLFGIGR	635.3329++	#N/A	#N/A	#N/A	#N/A	0	0
USH1G	NYV	CON	GILL-186	20160226	GILL-185_CtrlIP_RIPA_100ear_inj2_tgt2_95min_20160226_OT	NYVSSGLFGIGR	635.3329++	#N/A	#N/A	#N/A	#N/A	0	0
USH1G	NYV	138-1	GIL1649	20150223	GIL1649_IP_MYO7_Tgt2_20150223_OT	NYVSSGLFGIGR	635.3329++	41.41	0.34	4.1	0.9075	334974	167295	138-1 IP	avg	132365	±	37019.5	ttest=	5.28236e-06
USH1G	NYV	138-1	GIL1649	20150324	GIL1649_IP_MYO7_Tgt2_2_20150324_OT	NYVSSGLFGIGR	635.3329++	45.44	0.31	0.5	0.6406	53467	71792.7		avg/total	3.51295	±	0.982496	n=	6
USH1G	NYV	138-1	GIL1651	20150330	GIL1651_Myo7IP_Elut_tgt2_20150330_OT	NYVSSGLFGIGR	635.3329++	44.38	0.31	0.5	0.811	99912	160409				95% CI =	0.786146
USH1G	NYV	138-1	GIL1651	20150331	GIL1651_Myo7IP_Elut_tgt2_2_20150331_OT	NYVSSGLFGIGR	635.3329++	44.53	0.24	0.1	0.64	85285	121109				SEM=	0.401102
USH1G	NYV	138-1	GILL-186	20160226	GILL-185_CtrlIP_RIPA_100ear_inj1_tgt2_95min_20160226_OT	NYVSSGLFGIGR	635.3329++	44.46	0.32	-2.2	#N/A	223564	159271
USH1G	NYV	138-1	GILL-186	20160226	GILL-185_CtrlIP_RIPA_100ear_inj2_tgt2_95min_20160226_OT	NYVSSGLFGIGR	635.3329++	43.51	0.32	-2.1	#N/A	160454	114311
USH1G	NYV	TOT	GIL1649	20150331	GIL1649_IP_TOT1_tgt2_20150331_OT	NYVSSGLFGIGR	635.3329++	#N/A	#N/A	#N/A	0	0	0	TOTAL	avg	37679	±	114052
USH1G	NYV	TOT	GIL1649	20150331	GIL1649_IP_TOT3_tgt2_20150331_OT	NYVSSGLFGIGR	635.3329++	#N/A	#N/A	#N/A	0	0	0
USH1G	NYV	TOT	GIL1651	20150330	GIL1651_IP_TOT_1_tgt2_20150330_OT	NYVSSGLFGIGR	635.3329++	#N/A	#N/A	#N/A	0	0	0
USH1G	NYV	TOT	GIL1651	20150330	GIL1651_IP_TOT_2_tgt2_20150330_OT	NYVSSGLFGIGR	635.3329++	#N/A	#N/A	#N/A	0	0	0
USH1G	NYV	TOT	GIL1651	20150330	GIL1651_IP_TOT_3_tgt2_20150330_OT	NYVSSGLFGIGR	635.3329++	#N/A	#N/A	#N/A	0	0	0
USH1G	NYV	TOT	GIL1651	20150331	GIL1651_IP_TOT1_tgt2_2_20150331_OT	NYVSSGLFGIGR	635.3329++	#N/A	#N/A	#N/A	0	0	0
USH1G	NYV	TOT	GIL1651	20150331	GIL1651_IP_TOT2_tgt2_2_20150331_OT	NYVSSGLFGIGR	635.3329++	44.29	0.22	13.3	0.4356	254927	362008
USH1G	NYV	TOT	GIL1651	20150331	GIL1651_IP_TOT3_tgt2_2_20150331_OT	NYVSSGLFGIGR	635.3329++	#N/A	#N/A	#N/A	0	0	0
USH1G	NYV	TOT	GILL-186	20160226	GILL-185_TOT_RIPA_4ear_inj1_tgt2_95min_20160226_OT	NYVSSGLFGIGR	635.3329++	44.14	#N/A	#N/A	#N/A	0	0
USH1G	NYV	TOT	GILL-186	20160226	GILL-185_TOT_RIPA_4ear_inj2_tgt2_95min_20160226_OT	NYVSSGLFGIGR	635.3329++	44.46	0.18	-1.7	#N/A	20749	14782
